# Supplementary material for: Identification of N-Glycoproteins of Knee Cartilage from Adult Osteoarthritis and Kashin-Beck Disease Based on Quantitative Glycoproteomics, Compared with Normal Control Cartilage
Source: MDPI journal article supplement (doi:10.3390/cells11162513), 2022-08-12
Supplement: s1 [file s1]

## Supplementary materials

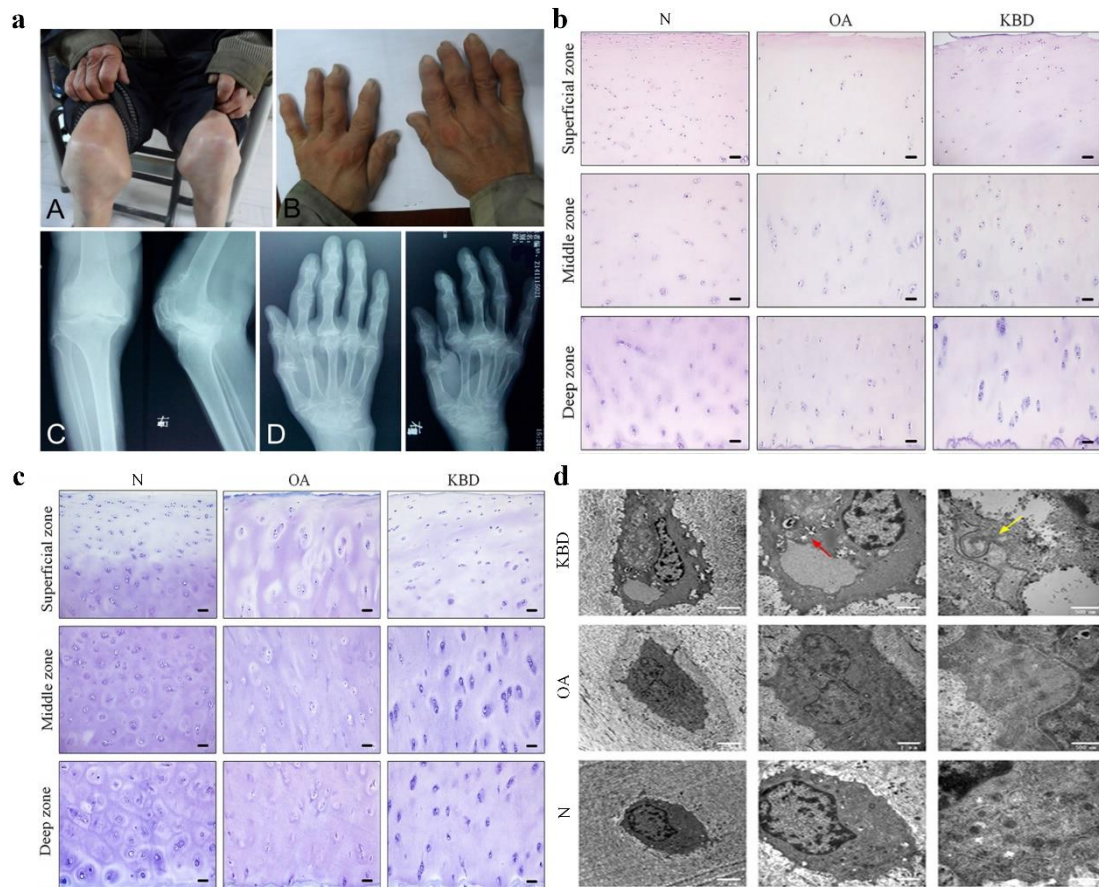

**Figure S1.** Clinical symptoms and pathological features of Kashin-beck disease. **a.** The main pathological features of Kashin-Beck disease (KBD) patients. Typical clinical manifestations of KBD patients [54]. **(A)** Deform joints in two knees and **(B)** flexion of the terminal finger joints or deformed fingers of grade III KBD adult. Radiographic findings in the right knee and right hand of a patient with grade II KBD. **(C)** Obvious joint space narrowing and loosened bodies in knee and D wrist joint crowded and space narrowing, phalanx thickening, and osteophyte formation. **b.** Hematoxylin and eosin (HE) staining of articular cartilage in normal (N), KBD, and osteoarthritis (OA) groups [55]. In KBD and OA groups, the cell numbers were much lower in all 3 layers compared with the N group. scale bar 20  $\mu\text{m}$ . **c.** Toluidine blue (TB) staining of articular cartilage in N, KBD, and OA groups [55]. In KBD and OA groups, the rates of intensive staining areas were much lower in all 3 layers compared with the N group. scale bar 20  $\mu\text{m}$ . **d.** TEM images of chondrocytes from KBD, OA patients compared with N (This part of the results has not yet been published). Compared with the N group, the KBD chondrocytes were observed mitochondrial damage (red box) and endoplasmic reticulum autophagy (yellow box).

**Table S1.** Characteristics of experiment subjects. OA: Osteoarthritis; KBD: Kashin-Beck-Disease; N: Normal adult; F: Female; M: Male.  $\chi^2_{\text{Gender}}=0.9$ ,  $F_{\text{Age}}=0.389$ , both  $P$  value  $> 0.05$ .

| Sample set | KBD    |         |        |        | OA     |         |        |        | N      |         |        |        |
|------------|--------|---------|--------|--------|--------|---------|--------|--------|--------|---------|--------|--------|
|            | Sample | Subject | Age    | Gender | Sample | Subject | Age    | Gender | Sample | Subject | Age    | Gender |
| 1          | KBD1   | ①       | 50     | F      | OA1    | ①       | 51     | M      | N1     | ①       | 65     | F      |
|            |        | ②       | 58     | F      |        | ②       | 56     | F      |        | ②       | 61     | M      |
|            |        | ③       | 50     | M      |        | ③       | 68     | M      |        | ③       | 59     | M      |
|            |        | ④       | 55     | M      |        | ④       | 58     | M      |        | ④       | 62     | F      |
| 2          | KBD2   | ⑤       | 61     | M      | OA2    | ⑤       | 60     | F      | N2     | ⑤       | 61     | M      |
|            |        | ⑥       | 66     | F      |        | ⑥       | 57     | F      |        | ⑥       | 57     | M      |
|            |        | ⑦       | 54     | F      |        | ⑦       | 67     | F      |        | ⑦       | 60     | M      |
|            |        | ⑧       | 68     | M      |        | ⑧       | 55     | M      |        | ⑧       | 63     | F      |
| 3          | KBD3   | ⑨       | 67     | F      | OA3    | ⑨       | 61     | M      | N3     | ⑨       | 60     | M      |
|            |        | Mean    | 58.778 | -      |        | Mean    | 59.222 | -      |        | Mean    | 60.889 | -      |

**Table S2.** The N-glycoproteins quantification results of the sample after pyrolysis. OA: Osteoarthritis; KBD: Kashin-Beck-Disease; N: Normal adult.

| Sample | Weight (μg) | Volume(μL) | Concentration (μg/μL) |
|--------|-------------|------------|-----------------------|
| KBD1   | 900         | 120.5      | 7.47                  |
| KBD2   | 900         | 140.46     | 6.41                  |
| KBD3   | 900         | 134.63     | 6.68                  |
| OA1    | 900         | 161.23     | 5.58                  |
| OA2    | 900         | 128.71     | 6.99                  |
| OA3    | 900         | 122.25     | 7.36                  |
| N1     | 900         | 87.66      | 10.27                 |
| N2     | 900         | 82.87      | 10.86                 |
| N3     | 900         | 85.17      | 10.57                 |

**Table S3.** The results of quantification of enzymatic hydrolysis peptide concentration. OA: osteoarthritis; KBD: Kashin-Beck-Disease; N: normal adult.

| Sample | Volume( $\mu$ L) | Concentration( $\mu$ g/ $\mu$ L) | Weight ( $\mu$ g) |
|--------|------------------|----------------------------------|-------------------|
| KBD1   | 200              | 1.609                            | 321.8             |
| KBD2   | 220              | 1.725                            | 379.5             |
| KBD3   | 220              | 1.848                            | 406.56            |
| OA1    | 170              | 2.014                            | 342.38            |
| OA2    | 180              | 1.743                            | 313.74            |
| OA3    | 170              | 2.109                            | 358.53            |
| N1     | 160              | 2.223                            | 355.68            |
| N2     | 160              | 2.104                            | 336.64            |
| N3     | 160              | 2.165                            | 368.05            |

Table S4. The list of identified N-glycoproteins.

Table S5. The list of identified N-glycopeptides.

Table S6. The list of identified N-glycosylation sites.

**Table S7.** The list of significant N-glycoproteins for analysis.

Table S8. TOP relative proteins or N-glycoproteins ranked by the involved signaling pathway.

1

| Uniprot Entry ID | Protein or N-glycoprotein                         | KBD vs OA/KBD vs N/OA vs N | Pathway name                                                                                                                                                                                                                                                                                                                                                                                                                                                                                                                                                                                                                    |
|------------------|---------------------------------------------------|----------------------------|---------------------------------------------------------------------------------------------------------------------------------------------------------------------------------------------------------------------------------------------------------------------------------------------------------------------------------------------------------------------------------------------------------------------------------------------------------------------------------------------------------------------------------------------------------------------------------------------------------------------------------|
| P05556           | ITGB1/Integrin beta-1                             | up/up/up                   | Phagosome; ECM-receptor interaction; Focal adhesion; Human papillomavirus infection; Cell adhesion molecules; PI3K-Akt signaling pathway; Shigellosis; Bacterial invasion of epithelial cells; Pertussis; Leishmaniasis; Arrhythmogenic right ventricular cardiomyopathy (ARVC); Hypertrophic cardiomyopathy (HCM); Small cell lung cancer; Dilated cardiomyopathy (DCM); Leukocyte transendothelial migration; Toxoplasmosis; Platelet activation; Tight junction; Axon guidance; Pathogenic Escherichia coli infection; Rap1 signaling pathway; Regulation of actin cytoskeleton; Pathways in cancer; Proteoglycans in cancer |
| P35442           | THBS2/Thrombospondin 2                            | down/up/up                 | Phagosome; ECM-receptor interaction; Focal adhesion; Human papillomavirus infection; PI3K-Akt signaling pathway                                                                                                                                                                                                                                                                                                                                                                                                                                                                                                                 |
| P08236           | GUSB/Beta-glucuronidase                           | -/up/-                     | Lysosome; Drug metabolism – other enzymes; Glycosaminoglycan degradation; Pentose and glucuronate interconversions Porphyrin and chlorophyll metabolism; Metabolic pathways                                                                                                                                                                                                                                                                                                                                                                                                                                                     |
| Q16853           | AOC3/Membrane primary amine oxidase               | -/-/up                     | Phenylalanine metabolism; beta-Alanine metabolism; Tyrosine metabolism; Glycine, serine, and threonine metabolism; Metabolic pathways                                                                                                                                                                                                                                                                                                                                                                                                                                                                                           |
| P24821           | TNC/Tenascin-C                                    | down/up/up                 | ECM-receptor interaction; Focal adhesion; Human papillomavirus infection; PI3K-Akt signaling pathway; MicroRNAs in cancer                                                                                                                                                                                                                                                                                                                                                                                                                                                                                                       |
| P02458           | COL2A1/Collagen alpha-1 (II) chain                | -/up/up                    | ECM-receptor interaction; Protein digestion and absorption; Focal adhesion; Human papillomavirus infection; PI3K-Akt signaling pathway                                                                                                                                                                                                                                                                                                                                                                                                                                                                                          |
| P13473           | LAMP2/Lysosome-associated membrane glycoprotein 2 | down/up/up                 | Phagosome; Lysosome; Tuberculosis; Autophagy                                                                                                                                                                                                                                                                                                                                                                                                                                                                                                                                                                                    |
| Q7Z5Y6           | BMP8A/Bone morphogenetic protein 8A               | up/-/-                     | TGF-beta signaling pathway; Cytokine-cytokine receptor interaction; Hippo signaling pathway; Thermogenesis                                                                                                                                                                                                                                                                                                                                                                                                                                                                                                                      |
| P05164           | MPO/Myeloperoxidase                               | down/down/down/            | Phagosome; Transcriptional misregulation in cancer; Acute myeloid leukemia; Drug metabolism - other enzymes                                                                                                                                                                                                                                                                                                                                                                                                                                                                                                                     |
| P27487           | DPP4/Dipeptidyl peptidase 4                       | up/up/-                    | Protein digestion and absorption                                                                                                                                                                                                                                                                                                                                                                                                                                                                                                                                                                                                |
| Q02388           | COL7A1/Collagen alpha-1 (VII) chain               | up/up/-                    | Protein digestion and absorption                                                                                                                                                                                                                                                                                                                                                                                                                                                                                                                                                                                                |
| Q7LGC8           | CHST-3/Carbohydrate sulfotransferase 3            | down/down/-                | Glycosaminoglycan biosynthesis - chondroitin sulfate / dermatan sulfate                                                                                                                                                                                                                                                                                                                                                                                                                                                                                                                                                         |
| Q8NCG5           | CHST-4/Carbohydrate sulfotransferase 4            | down/down/-                | Glycosaminoglycan biosynthesis - keratan sulfate                                                                                                                                                                                                                                                                                                                                                                                                                                                                                                                                                                                |

2
