# Supplementary material for: Identification of N-Glycoproteins of Knee Cartilage from Adult Osteoarthritis and Kashin-Beck Disease Based on Quantitative Glycoproteomics, Compared with Normal Control Cartilage
Source: Cells. 2022 Aug 12;11(16):2513. doi: 10.3390/cells11162513 (PMC9406367; doi:10.3390/cells11162513)
Supplement: Supplementary file 1 [file cells-11-02513-s001.zip]

Archive with 5 entries (5 files):
- cells-1797819-supplementary.pdf
- Tabel S4 N-GlycoProtein-Identification-list.xlsx
- Tabel S5 N-GlycoPeptide-Identification-list.xlsx
- Tabel S6 N-GlycoSite-Identification-list.xlsx
- Table S7 Significant-GlycoProtein-analysis.xlsx
