# Supplementary material for: Identification of N-Glycoproteins of Knee Cartilage from Adult Osteoarthritis and Kashin-Beck Disease Based on Quantitative Glycoproteomics, Compared with Normal Control Cartilage
Source: Cells. 2022 Aug 12;11(16):2513. doi: 10.3390/cells11162513 (PMC9406367; doi:10.3390/cells11162513)
Supplement: Supplementary file 1 [file cells-11-02513-s001.zip › Tabel S4 N-GlycoProtein-Identification-list.xlsx]

## Sheet: proteinGroups
ID	Protein IDs	Protein names	Gene names	Majority protein IDs	Fasta headers	Number of proteins	Peptides	Unique peptides	Peptides CK1	Peptides CK2	Peptides CK3	Peptides KBD1	Peptides KBD2	Peptides KBD3	Peptides OA1	Peptides OA2	Peptides OA3	Unique peptides CK1	Unique peptides CK2	Unique peptides CK3	Unique peptides KBD1	Unique peptides KBD2	Unique peptides KBD3	Unique peptides OA1	Unique peptides OA2	Unique peptides OA3	Sequence coverage [%]	Unique sequence coverage [%]	Mol. weight [kDa]	Sequence length	Q-value	Score	Sequence coverage CK1 [%]	Sequence coverage CK2 [%]	Sequence coverage CK3 [%]	Sequence coverage KBD1 [%]	Sequence coverage KBD2 [%]	Sequence coverage KBD3 [%]	Sequence coverage OA1 [%]	Sequence coverage OA2 [%]	Sequence coverage OA3 [%]	LFQ intensity CK1	LFQ intensity CK2	LFQ intensity CK3	LFQ intensity KBD1	LFQ intensity KBD2	LFQ intensity KBD3	LFQ intensity OA1	LFQ intensity OA2
8	A0A024QZ95	Olfactomedin 4, isoform CRA_a	OLFM4 hCG_29567	A0A024QZ95;Q6UX06	tr|A0A024QZ95|A0A024QZ95_HUMAN Olfactomedin 4, isoform CRA_a OS=Homo sapiens OX=9606 GN=OLFM4 PE=4 SV=1;sp|Q6UX06|OLFM4_HUMAN Olfactomedin-4 OS=Homo sapiens OX=9606 GN=OLFM4 PE=1 SV=1	2	1	1	0	0	0	0	0	0	0	0	1	0	0	0	0	0	0	0	0	1	4.3	4.3	57.279	510	0	80.375	0	0	0	0	0	0	0	0	4.3	0	0	0	0	0	0	0	0
12	A0A024QZU7	Phosphatidic acid phosphatase type 2A, isoform CRA_b	PPAP2A hCG_39580	A0A024QZU7;A0A024QZS3;O14494	tr|A0A024QZU7|A0A024QZU7_HUMAN Phosphatidic acid phosphatase type 2A, isoform CRA_b OS=Homo sapiens OX=9606 GN=PPAP2A PE=4 SV=1;tr|A0A024QZS3|A0A024QZS3_HUMAN Phosphatidic acid phosphatase type 2A, isoform CRA_a OS=Homo sapiens OX=9606 GN=PPAP2A PE=4 SV=1;	3	1	1	0	0	0	1	0	0	1	1	1	0	0	0	1	0	0	1	1	1	4.9	4.9	32.15	285	0	63.91	0	0	0	4.9	0	0	4.9	4.9	4.9	0	0	0	9147900	0	0	13285000	7040500
17	A0A024R035	Complement component 9, isoform CRA_a	C9 hCG_37544	A0A024R035;P02748	tr|A0A024R035|A0A024R035_HUMAN Complement component 9, isoform CRA_a OS=Homo sapiens OX=9606 GN=C9 PE=4 SV=1;sp|P02748|CO9_HUMAN Complement component C9 OS=Homo sapiens OX=9606 GN=C9 PE=1 SV=2	2	1	1	0	0	0	1	0	0	0	1	0	0	0	0	1	0	0	0	1	0	3.2	3.2	63.203	559	0	16.832	0	0	0	3.2	0	0	0	3.2	0	0	0	0	0	0	0	0	0
24	A0A024R1Y9	Contactin associated protein 1, isoform CRA_a	CNTNAP1 hCG_16945	A0A024R1Y9;P78357	tr|A0A024R1Y9|A0A024R1Y9_HUMAN Contactin associated protein 1, isoform CRA_a OS=Homo sapiens OX=9606 GN=CNTNAP1 PE=4 SV=1;sp|P78357|CNTP1_HUMAN Contactin-associated protein 1 OS=Homo sapiens OX=9606 GN=CNTNAP1 PE=1 SV=1	2	1	1	0	0	0	0	0	0	1	0	0	0	0	0	0	0	0	1	0	0	0.8	0.8	99.031	878	0	1.9483	0	0	0	0	0	0	0.8	0	0	0	0	0	0	0	0	0	0
30	A0A024R3C4	KDEL (Lys-Asp-Glu-Leu) containing 2, isoform CRA_a	KDELC2 hCG_39502	A0A024R3C4;Q7Z4H8	tr|A0A024R3C4|A0A024R3C4_HUMAN KDEL (Lys-Asp-Glu-Leu) containing 2, isoform CRA_a OS=Homo sapiens OX=9606 GN=KDELC2 PE=4 SV=1;sp|Q7Z4H8|KDEL2_HUMAN KDEL motif-containing protein 2 OS=Homo sapiens OX=9606 GN=KDELC2 PE=1 SV=2	2	1	1	1	1	0	1	1	0	0	0	1	1	1	0	1	1	0	0	0	1	3.2	3.2	58.572	507	0	155.02	3.2	3.2	0	3.2	3.2	0	0	0	3.2	116110000	130160000	0	948800000	65695000	0	0	0
31	A0A024R3J7	HCG2032701, isoform CRA_a	hCG_2032701	A0A024R3J7;P46977	tr|A0A024R3J7|A0A024R3J7_HUMAN HCG2032701, isoform CRA_a OS=Homo sapiens OX=9606 GN=hCG_2032701 PE=4 SV=1;sp|P46977|STT3A_HUMAN Dolichyl-diphosphooligosaccharide--protein glycosyltransferase subunit STT3A OS=Homo sapiens OX=9606 GN=STT3A PE=1 SV=2	2	1	1	1	1	1	1	0	1	1	1	1	1	1	1	1	0	1	1	1	1	2.3	2.3	80.428	703	0	261.55	2.3	2.3	2.3	2.3	0	2.3	2.3	2.3	2.3	43089000	47753000	46394000	227810000	0	123360000	225500000	304350000
35	A0A024R462	Fibronectin 1, isoform CRA_n	FN1 hCG_1813428	A0A024R462;P02751;B7ZLE5;A0A384MR03	tr|A0A024R462|A0A024R462_HUMAN Fibronectin 1, isoform CRA_n OS=Homo sapiens OX=9606 GN=FN1 PE=4 SV=1;sp|P02751|FINC_HUMAN Fibronectin OS=Homo sapiens OX=9606 GN=FN1 PE=1 SV=4;tr|B7ZLE5|B7ZLE5_HUMAN FN1 protein OS=Homo sapiens OX=9606 GN=FN1 PE=2 SV=1;tr|A0	25	44	4	16	18	18	33	12	17	24	28	30	1	1	1	2	1	1	2	3	2	33.5	2.6	259.21	2355	0	323.31	10.7	13.8	12.5	23.9	8.6	13.1	18.3	21.7	22.8	15523000000	27819000000	16177000000	26720000000	22641000000	28235000000	34009000000	12597000000
40	A0A024R599	Solute carrier family 3 (Activators of dibasic and neutral amino acid transport), member 2, isoform CRA_e	SLC3A2 hCG_2016598	A0A024R599;B4E2Z3;F5GZS6;J3KPF3;P08195;H0YFX4	tr|A0A024R599|A0A024R599_HUMAN Solute carrier family 3 (Activators of dibasic and neutral amino acid transport), member 2, isoform CRA_e OS=Homo sapiens OX=9606 GN=SLC3A2 PE=4 SV=1;tr|B4E2Z3|B4E2Z3_HUMAN cDNA FLJ54090, highly similar to 4F2 cell-surface an	6	2	2	0	0	0	2	1	2	1	1	1	0	0	0	2	1	2	1	1	1	6.8	6.8	43.518	398	0	50.139	0	0	0	6.8	3.3	6.8	3.3	3.3	3.3	0	0	0	20208000	21352000	28528000	12781000	16647000
46	A0A024R5S2	Cancer susceptibility candidate 4, isoform CRA_a	CASC4 hCG_2003796	A0A024R5S2;A8K4R1;Q6P4E1;H0YMR0;A0A3B3IRW9	tr|A0A024R5S2|A0A024R5S2_HUMAN Cancer susceptibility candidate 4, isoform CRA_a OS=Homo sapiens OX=9606 GN=CASC4 PE=4 SV=1;tr|A8K4R1|A8K4R1_HUMAN cDNA FLJ77420, highly similar to Homo sapiens cancer susceptibility candidate 4 (CASC4), transcript variant 2,	5	2	2	0	0	0	2	0	1	1	2	1	0	0	0	2	0	1	1	2	1	13.6	13.6	20.934	177	0	3.057	0	0	0	13.6	0	4.5	4.5	13.6	4.5	0	0	0	12508000	0	13531000	10644000	32181000
49	A0A024R6E0	SPARC related modular calcium binding 1, isoform CRA_b	SMOC1 hCG_21971	A0A024R6E0;Q9H4F8	tr|A0A024R6E0|A0A024R6E0_HUMAN SPARC related modular calcium binding 1, isoform CRA_b OS=Homo sapiens OX=9606 GN=SMOC1 PE=4 SV=1;sp|Q9H4F8|SMOC1_HUMAN SPARC-related modular calcium-binding protein 1 OS=Homo sapiens OX=9606 GN=SMOC1 PE=1 SV=1	2	1	1	0	1	1	1	1	0	0	1	1	0	1	1	1	1	0	0	1	1	1.6	1.6	48.162	434	0.0064935	0.70884	0	1.6	1.6	1.6	1.6	0	0	1.6	1.6	0	31989000	8314900	129870000	156400000	0	0	76308000
55	A0A024R6P0	Serpin peptidase inhibitor, clade A (Alpha-1 antiproteinase, antitrypsin), member 3, isoform CRA_c	SERPINA3 hCG_2039549	A0A024R6P0;B3KS79;P01011;G3V595;G3V3A0	tr|A0A024R6P0|A0A024R6P0_HUMAN Serpin peptidase inhibitor, clade A (Alpha-1 antiproteinase, antitrypsin), member 3, isoform CRA_c OS=Homo sapiens OX=9606 GN=SERPINA3 PE=3 SV=1;tr|B3KS79|B3KS79_HUMAN cDNA FLJ35730 fis, clone TESTI2003131, highly similar to	6	4	4	1	3	2	3	2	2	2	3	3	1	3	2	3	2	2	2	3	3	15.6	15.6	47.65	423	0	323.31	4.7	13.2	8.5	13.2	8.5	8.5	8.5	13.2	10.9	35759000	1261800000	358200000	372040000	249930000	90578000	254540000	1121600000
58	A0A024R7B2	Endothelial differentiation, sphingolipid G-protein-coupled receptor, 5, isoform CRA_a	EDG5 hCG_28477	A0A024R7B2;O95136	tr|A0A024R7B2|A0A024R7B2_HUMAN Endothelial differentiation, sphingolipid G-protein-coupled receptor, 5, isoform CRA_a OS=Homo sapiens OX=9606 GN=EDG5 PE=3 SV=1;sp|O95136|S1PR2_HUMAN Sphingosine 1-phosphate receptor 2 OS=Homo sapiens OX=9606 GN=S1PR2 PE=1 S	2	1	1	0	0	1	1	0	0	1	1	1	0	0	1	1	0	0	1	1	1	2.5	2.5	38.867	353	0.003663	1.3673	0	0	2.5	2.5	0	0	2.5	2.5	2.5	0	0	0	0	0	0	2695600	2415900
61	A0A024R7N5	Kelch-like 26 (Drosophila), isoform CRA_a	KLHL26 hCG_37049	A0A024R7N5;Q53HC5	tr|A0A024R7N5|A0A024R7N5_HUMAN Kelch-like 26 (Drosophila), isoform CRA_a OS=Homo sapiens OX=9606 GN=KLHL26 PE=4 SV=1;sp|Q53HC5|KLH26_HUMAN Kelch-like protein 26 OS=Homo sapiens OX=9606 GN=KLHL26 PE=1 SV=2	2	1	1	0	1	1	1	0	1	1	1	1	0	1	1	1	0	1	1	1	1	1.6	1.6	68.139	615	0.0050083	0.81018	0	1.6	1.6	1.6	0	1.6	1.6	1.6	1.6	0	1435800000	1432800000	0	0	0	0	0
62	A0A024R7W0	Inositol monophosphatase domain containing 1, isoform CRA_a	IMPAD1 hCG_40999	A0A024R7W0;Q9NX62	tr|A0A024R7W0|A0A024R7W0_HUMAN Inositol monophosphatase domain containing 1, isoform CRA_a OS=Homo sapiens OX=9606 GN=IMPAD1 PE=4 SV=1;sp|Q9NX62|IMPA3_HUMAN Inositol monophosphatase 3 OS=Homo sapiens OX=9606 GN=IMPAD1 PE=1 SV=1	2	1	1	1	0	1	1	1	0	0	1	0	1	0	1	1	1	0	0	1	0	6.1	6.1	38.681	359	0	168.07	6.1	0	6.1	6.1	6.1	0	0	6.1	0	0	0	7745400	23346000	0	0	0	43750000
64	A0A024R816	Protein tweety homolog	TTYH3 hCG_18437	A0A024R816;Q9C0H2	tr|A0A024R816|A0A024R816_HUMAN Protein tweety homolog OS=Homo sapiens OX=9606 GN=TTYH3 PE=3 SV=1;sp|Q9C0H2|TTYH3_HUMAN Protein tweety homolog 3 OS=Homo sapiens OX=9606 GN=TTYH3 PE=1 SV=3	2	1	1	0	0	0	1	0	0	0	0	0	0	0	0	1	0	0	0	0	0	4	4	57.544	523	0	1.5265	0	0	0	4	0	0	0	0	0	0	0	0	13368000	0	0	0	0
70	A0A024R8G3	Prostaglandin D2 synthase 21kDa (Brain), isoform CRA_a (Testis tissue sperm-binding protein Li 63n)	PTGDS hCG_1780827	A0A024R8G3;Q5SQ11;P41222	tr|A0A024R8G3|A0A024R8G3_HUMAN Prostaglandin D2 synthase 21kDa (Brain), isoform CRA_a OS=Homo sapiens OX=9606 GN=PTGDS PE=2 SV=1;tr|Q5SQ11|Q5SQ11_HUMAN Prostaglandin-H2 D-isomerase (Fragment) OS=Homo sapiens OX=9606 GN=PTGDS PE=1 SV=1;sp|P41222|PTGDS_HUMAN	3	2	2	1	2	0	2	1	2	1	2	1	1	2	0	2	1	2	1	2	1	17.4	17.4	21.029	190	0	109.71	7.4	17.4	0	17.4	10	17.4	10	17.4	10	95065000	65586000	0	175220000	77664000	76801000	301890000	107560000
71	A0A024R8Q1	Glucosidase, alpha acid (Pompe disease, glycogen storage disease type II), isoform CRA_a	GAA hCG_27920	A0A024R8Q1;P10253;B7Z5V6	tr|A0A024R8Q1|A0A024R8Q1_HUMAN Glucosidase, alpha acid (Pompe disease, glycogen storage disease type II), isoform CRA_a OS=Homo sapiens OX=9606 GN=GAA PE=3 SV=1;sp|P10253|LYAG_HUMAN Lysosomal alpha-glucosidase OS=Homo sapiens OX=9606 GN=GAA PE=1 SV=4;tr|B7	5	4	4	1	0	1	3	0	0	1	3	1	1	0	1	3	0	0	1	3	1	7.6	7.6	105.34	952	0	203.53	1.8	0	1.6	4.4	0	0	1.8	6	1.8	38510000	0	21443000	37080000	0	0	22532000	31418000
75	A0A024R930	Proteoglycan 4, isoform CRA_a	PRG4 hCG_41181	A0A024R930;Q92954;B3KQ20;A0A0U1RR20	tr|A0A024R930|A0A024R930_HUMAN Proteoglycan 4, isoform CRA_a OS=Homo sapiens OX=9606 GN=PRG4 PE=4 SV=1;sp|Q92954|PRG4_HUMAN Proteoglycan 4 OS=Homo sapiens OX=9606 GN=PRG4 PE=1 SV=3;tr|B3KQ20|B3KQ20_HUMAN cDNA FLJ32635 fis, clone SYNOV2000178, highly simila	6	3	3	2	2	3	2	1	1	1	1	1	2	2	3	2	1	1	1	1	1	4.1	4.1	151.08	1404	0	41.943	1.8	1.8	4.1	2.9	0.6	0.6	0.6	0.6	0.6	72119000	55968000	28767000	34714000	49913000	71013000	26416000	15642000
76	A0A024R931	alpha-1,2-Mannosidase (EC 3.2.1.-)	C1orf22 hCG_2025041	A0A024R931;Q9BZQ6	tr|A0A024R931|A0A024R931_HUMAN alpha-1,2-Mannosidase OS=Homo sapiens OX=9606 GN=C1orf22 PE=3 SV=1;sp|Q9BZQ6|EDEM3_HUMAN ER degradation-enhancing alpha-mannosidase-like protein 3 OS=Homo sapiens OX=9606 GN=EDEM3 PE=1 SV=2	2	1	1	0	0	0	1	0	0	0	0	0	0	0	0	1	0	0	0	0	0	1.6	1.6	104.66	932	0	1.8227	0	0	0	1.6	0	0	0	0	0	0	0	0	0	0	0	0	0
78	A0A024R957	Torsin A interacting protein 2, isoform CRA_b	TOR1AIP2 hCG_2039855	A0A024R957;Q8NFQ8	tr|A0A024R957|A0A024R957_HUMAN Torsin A interacting protein 2, isoform CRA_b OS=Homo sapiens OX=9606 GN=TOR1AIP2 PE=4 SV=1;sp|Q8NFQ8|TOIP2_HUMAN Torsin-1A-interacting protein 2 OS=Homo sapiens OX=9606 GN=TOR1AIP2 PE=1 SV=1	2	1	1	0	0	0	1	0	0	0	0	1	0	0	0	1	0	0	0	0	1	4	4	51.263	470	0	5.8387	0	0	0	4	0	0	0	0	4	0	0	0	3352200	0	0	0	0
79	A0A024R962	HCG40889, isoform CRA_b	hCG_40889	A0A024R962;P08603;Q14006;A0A024R984;A8K5T0	tr|A0A024R962|A0A024R962_HUMAN HCG40889, isoform CRA_b OS=Homo sapiens OX=9606 GN=hCG_40889 PE=1 SV=1;sp|P08603|CFAH_HUMAN Complement factor H OS=Homo sapiens OX=9606 GN=CFH PE=1 SV=4;tr|Q14006|Q14006_HUMAN HF protein (Fragment) OS=Homo sapiens OX=9606 GN=	7	6	5	0	3	2	6	1	2	4	3	3	0	3	2	5	1	2	4	3	3	9.4	7.4	139.07	1231	0	228.2	0	5.3	2.5	9.4	1.5	2.5	6.3	3.6	3.6	0	90762000	62646000	848180000	297540000	210530000	391540000	586780000
81	A0A024R972	Laminin, gamma 1 (Formerly LAMB2), isoform CRA_a	LAMC1 hCG_40729	A0A024R972;P11047	tr|A0A024R972|A0A024R972_HUMAN Laminin, gamma 1 (Formerly LAMB2), isoform CRA_a OS=Homo sapiens OX=9606 GN=LAMC1 PE=4 SV=1;sp|P11047|LAMC1_HUMAN Laminin subunit gamma-1 OS=Homo sapiens OX=9606 GN=LAMC1 PE=1 SV=3	2	8	8	1	1	1	8	4	3	6	7	6	1	1	1	8	4	3	6	7	6	5.9	5.9	174.01	1573	0	323.31	1.1	1.1	1.1	5.9	3.1	2.6	5	5	5	199110000	169530000	74062000	429560000	474140000	135760000	385610000	400920000
89	A0A024RAB6	Heparan sulfate proteoglycan 2 (Perlecan), isoform CRA_b	HSPG2 hCG_1981506	A0A024RAB6;P98160	tr|A0A024RAB6|A0A024RAB6_HUMAN Heparan sulfate proteoglycan 2 (Perlecan), isoform CRA_b OS=Homo sapiens OX=9606 GN=HSPG2 PE=4 SV=1;sp|P98160|PGBM_HUMAN Basement membrane-specific heparan sulfate proteoglycan core protein OS=Homo sapiens OX=9606 GN=HSPG2 PE	6	8	8	5	6	5	7	4	7	6	6	3	5	6	5	7	4	7	6	6	3	3.4	3.4	464.01	4346	0	323.31	2.6	2.8	2.6	3	1.7	3.1	2.9	2.8	1.9	1335000000	860770000	1154700000	1276100000	596660000	766890000	873340000	773180000
92	A0A024RAK9	Hyaluronan and proteoglycan link protein 1, isoform CRA_a	HAPLN1 hCG_39210	A0A024RAK9;P10915;D6RBS1;D6RG04	tr|A0A024RAK9|A0A024RAK9_HUMAN Hyaluronan and proteoglycan link protein 1, isoform CRA_a OS=Homo sapiens OX=9606 GN=HAPLN1 PE=4 SV=1;sp|P10915|HPLN1_HUMAN Hyaluronan and proteoglycan link protein 1 OS=Homo sapiens OX=9606 GN=HAPLN1 PE=2 SV=2;tr|D6RBS1|D6RB	8	16	15	9	9	15	7	4	5	6	10	9	9	8	15	7	4	5	6	9	9	65.8	62.4	40.165	354	0	323.31	35.9	38.1	62.4	31.6	11.6	17.2	26.3	40.7	39	82635000000	96294000000	162460000000	14957000000	54614000000	52894000000	17477000000	18955000000
99	A0A024RC61	Aminopeptidase (EC 3.4.11.-)	ANPEP hCG_27217	A0A024RC61;Q59E93;P15144	tr|A0A024RC61|A0A024RC61_HUMAN Aminopeptidase OS=Homo sapiens OX=9606 GN=ANPEP PE=3 SV=1;tr|Q59E93|Q59E93_HUMAN Aminopeptidase (Fragment) OS=Homo sapiens OX=9606 PE=2 SV=1;sp|P15144|AMPN_HUMAN Aminopeptidase N OS=Homo sapiens OX=9606 GN=ANPEP PE=1 SV=4	8	6	6	0	0	0	6	4	6	2	4	3	0	0	0	6	4	6	2	4	3	7.3	7.3	109.54	967	0	323.31	0	0	0	7.3	6.2	7.3	3.4	5.5	4.4	0	0	0	628320000	525760000	517410000	140160000	313400000
113	A0A075B728	Platelet endothelial cell adhesion molecule (Fragment)	PECAM1	A0A075B728;A0A075B727;B7Z8Y6;P16284	tr|A0A075B728|A0A075B728_HUMAN Platelet endothelial cell adhesion molecule (Fragment) OS=Homo sapiens OX=9606 GN=PECAM1 PE=1 SV=7;tr|A0A075B727|A0A075B727_HUMAN Platelet endothelial cell adhesion molecule (Fragment) OS=Homo sapiens OX=9606 GN=PECAM1 PE=1 S	4	1	1	0	0	0	1	0	0	0	1	0	0	0	0	1	0	0	0	1	0	4.9	4.9	20.789	183	0	18.17	0	0	0	4.9	0	0	0	4.9	0	0	0	0	3281700	0	0	0	0
116	A0A087WSY5	Carboxypeptidase B2	CPB2	A0A087WSY5;Q96IY4	tr|A0A087WSY5|A0A087WSY5_HUMAN Carboxypeptidase B2 OS=Homo sapiens OX=9606 GN=CPB2 PE=1 SV=1;sp|Q96IY4|CBPB2_HUMAN Carboxypeptidase B2 OS=Homo sapiens OX=9606 GN=CPB2 PE=1 SV=2	2	1	1	0	1	1	1	0	1	1	1	0	0	1	1	1	0	1	1	1	0	3.9	3.9	44.022	386	0	58.025	0	3.9	3.9	3.9	0	3.9	3.9	3.9	0	0	0	0	25952000	0	0	0	36752000
117	A0A087WT00	CD302 antigen	CD302	A0A087WT00;Q8IX05	tr|A0A087WT00|A0A087WT00_HUMAN CD302 antigen OS=Homo sapiens OX=9606 GN=CD302 PE=4 SV=1;sp|Q8IX05|CD302_HUMAN CD302 antigen OS=Homo sapiens OX=9606 GN=CD302 PE=1 SV=1	2	1	1	0	0	0	1	0	0	1	1	1	0	0	0	1	0	0	1	1	1	5.6	5.6	21.851	195	0	3.3569	0	0	0	5.6	0	0	5.6	5.6	5.6	0	0	0	6008100	0	0	8023400	7839100
127	A0A087WUZ2	IgGFc-binding protein	FCGBP	A0A087WUZ2;A0A087WXI2;Q9Y6R7	tr|A0A087WUZ2|A0A087WUZ2_HUMAN IgGFc-binding protein OS=Homo sapiens OX=9606 GN=FCGBP PE=1 SV=1;tr|A0A087WXI2|A0A087WXI2_HUMAN IgGFc-binding protein (Fragment) OS=Homo sapiens OX=9606 GN=FCGBP PE=1 SV=2;sp|Q9Y6R7|FCGBP_HUMAN IgGFc-binding protein OS=Homo s	3	1	1	0	0	0	1	0	0	0	0	0	0	0	0	1	0	0	0	0	0	1.5	1.5	174.12	1642	0	3.0162	0	0	0	1.5	0	0	0	0	0	0	0	0	0	0	0	0	0
130	A0A087WVP1	Protocadherin Fat 1	FAT1	A0A087WVP1;Q14517	tr|A0A087WVP1|A0A087WVP1_HUMAN Protocadherin Fat 1 OS=Homo sapiens OX=9606 GN=FAT1 PE=1 SV=1;sp|Q14517|FAT1_HUMAN Protocadherin Fat 1 OS=Homo sapiens OX=9606 GN=FAT1 PE=1 SV=2	2	1	1	0	0	0	0	0	0	1	0	0	0	0	0	0	0	0	1	0	0	0.3	0.3	506.37	4590	0.0018657	1.521	0	0	0	0	0	0	0.3	0	0	0	0	0	0	0	0	0	0
125	A0A087WVS4	High affinity immunoglobulin gamma Fc receptor IB	FCGR1B	A0A087WVS4;A0A087WUG7;A0A087WXZ6;A0A0A0MRM3;Q92637;P12314;C9JSN8	tr|A0A087WVS4|A0A087WVS4_HUMAN High affinity immunoglobulin gamma Fc receptor IB OS=Homo sapiens OX=9606 GN=FCGR1B PE=4 SV=1;tr|A0A087WUG7|A0A087WUG7_HUMAN High affinity immunoglobulin gamma Fc receptor IB OS=Homo sapiens OX=9606 GN=FCGR1B PE=4 SV=1;tr|A0A	7	2	2	0	0	0	2	1	1	0	0	0	0	0	0	2	1	1	0	0	0	12.9	12.9	25.217	224	0	21.558	0	0	0	12.9	5.8	5.8	0	0	0	0	0	0	15395000	0	5998300	0	0
131	A0A087WW43	Inter-alpha-trypsin inhibitor heavy chain H3	ITIH3	A0A087WW43;Q06033	tr|A0A087WW43|A0A087WW43_HUMAN Inter-alpha-trypsin inhibitor heavy chain H3 OS=Homo sapiens OX=9606 GN=ITIH3 PE=1 SV=1;sp|Q06033|ITIH3_HUMAN Inter-alpha-trypsin inhibitor heavy chain H3 OS=Homo sapiens OX=9606 GN=ITIH3 PE=1 SV=2	2	1	1	0	0	0	1	0	0	0	1	0	0	0	0	1	0	0	0	1	0	1.9	1.9	75.077	670	0	6.9651	0	0	0	1.9	0	0	0	1.9	0	0	0	0	17343000	0	0	0	5934600
134	A0A087WXP0	Azurocidin	AZU1	A0A087WXP0;Q86SR2;P20160	tr|A0A087WXP0|A0A087WXP0_HUMAN Azurocidin OS=Homo sapiens OX=9606 GN=AZU1 PE=1 SV=1;tr|Q86SR2|Q86SR2_HUMAN AZU1 protein (Fragment) OS=Homo sapiens OX=9606 GN=AZU1 PE=2 SV=1;sp|P20160|CAP7_HUMAN Azurocidin OS=Homo sapiens OX=9606 GN=AZU1 PE=1 SV=3	3	1	1	1	1	1	0	0	0	0	0	1	1	1	1	0	0	0	0	0	1	16.7	16.7	16.423	150	0	179.35	16.7	16.7	16.7	0	0	0	0	0	16.7	117030000	0	137700000	0	0	0	0	0
133	A0A087WYF1	Laminin subunit alpha-2	LAMA2	A0A087WYF1;A0A087WX80;P24043;Q59H37	tr|A0A087WYF1|A0A087WYF1_HUMAN Laminin subunit alpha-2 OS=Homo sapiens OX=9606 GN=LAMA2 PE=1 SV=1;tr|A0A087WX80|A0A087WX80_HUMAN Laminin subunit alpha-2 OS=Homo sapiens OX=9606 GN=LAMA2 PE=1 SV=1;sp|P24043|LAMA2_HUMAN Laminin subunit alpha-2 OS=Homo sapien	4	4	4	0	0	0	4	0	0	4	3	2	0	0	0	4	0	0	4	3	2	1.4	1.4	343.41	3118	0	136.83	0	0	0	1.4	0	0	1.4	1	0.7	0	0	0	14474000	0	0	30958000	9658100
101	A0A087WYV6	Tetraspanin-6	TSPAN6	A0A087WYV6;A0A087WZU5;A0A024RCI0;B4DRB0;B4DUZ1;B3KQJ7;Q59ED5;O43657	tr|A0A087WYV6|A0A087WYV6_HUMAN Tetraspanin-6 OS=Homo sapiens OX=9606 GN=TSPAN6 PE=1 SV=1;tr|A0A087WZU5|A0A087WZU5_HUMAN Tetraspanin-6 OS=Homo sapiens OX=9606 GN=TSPAN6 PE=1 SV=1;tr|A0A024RCI0|A0A024RCI0_HUMAN Tetraspanin 6, isoform CRA_a OS=Homo sapiens OX	8	1	1	0	1	1	1	1	0	0	0	0	0	1	1	1	1	0	0	0	0	7	7	14.958	129	0	1.5946	0	7	7	7	7	0	0	0	0	0	53826000	43743000	40797000	23185000	0	0	0
138	A0A087X0A8	Collagen alpha-1(XII) chain	COL12A1	A0A087X0A8;B9EJB8;D6RGG3;Q99715;H0Y5N9	tr|A0A087X0A8|A0A087X0A8_HUMAN Collagen alpha-1(XII) chain OS=Homo sapiens OX=9606 GN=COL12A1 PE=1 SV=1;tr|B9EJB8|B9EJB8_HUMAN Collagen, type XII, alpha 1 OS=Homo sapiens OX=9606 GN=COL12A1 PE=2 SV=1;tr|D6RGG3|D6RGG3_HUMAN Collagen alpha-1(XII) chain OS=Ho	7	4	4	3	3	3	4	3	4	3	4	3	3	3	3	4	3	4	3	4	3	3.4	3.4	203.11	1874	0	213.18	2.1	2.1	2.1	3.4	2.1	3.4	2.1	3.4	2.1	511370000	630890000	561320000	7382100000	583280000	3676700000	1466600000	2599800000
141	A0A087X0S5	Collagen alpha-1(VI) chain	COL6A1	A0A087X0S5;A0A384P5H7;P12109;B4DRR8;D3DSM7	tr|A0A087X0S5|A0A087X0S5_HUMAN Collagen alpha-1(VI) chain OS=Homo sapiens OX=9606 GN=COL6A1 PE=1 SV=1;tr|A0A384P5H7|A0A384P5H7_HUMAN Collagen, type VI, alpha 1, isoform CRA_b OS=Homo sapiens OX=9606 GN=COL6A1 PE=2 SV=1;sp|P12109|CO6A1_HUMAN Collagen alpha-	8	17	17	2	2	2	12	4	5	10	14	12	2	2	2	12	4	5	10	14	12	26.2	26.2	108.34	1026	0	323.31	1.2	1.2	1.2	16.6	4.5	4.6	16.9	21.8	18.7	107360000	103900000	109990000	2159500000	503900000	1177200000	1504400000	1821300000
143	A0A087X191	Beta-1,3-N-acetylglucosaminyltransferase lunatic fringe	LFNG	A0A087X191;Q8NES3	tr|A0A087X191|A0A087X191_HUMAN Beta-1,3-N-acetylglucosaminyltransferase lunatic fringe OS=Homo sapiens OX=9606 GN=LFNG PE=1 SV=1;sp|Q8NES3|LFNG_HUMAN Beta-1,3-N-acetylglucosaminyltransferase lunatic fringe OS=Homo sapiens OX=9606 GN=LFNG PE=1 SV=2	2	1	1	1	1	1	0	0	1	1	0	0	1	1	1	0	0	1	1	0	0	6.5	6.5	28.024	248	0	18.367	6.5	6.5	6.5	0	0	6.5	6.5	0	0	22419000	48775000	0	0	0	3975300	3379200	0
144	A0A087X1T7	Aggrecan core protein	ACAN	A0A087X1T7;H0YMF1;Q6PID9	tr|A0A087X1T7|A0A087X1T7_HUMAN Aggrecan core protein OS=Homo sapiens OX=9606 GN=ACAN PE=1 SV=1;tr|H0YMF1|H0YMF1_HUMAN Aggrecan core protein OS=Homo sapiens OX=9606 GN=ACAN PE=1 SV=2;tr|Q6PID9|Q6PID9_HUMAN Aggrecan OS=Homo sapiens OX=9606 GN=ACAN PE=1 SV=1	4	32	1	20	19	25	17	8	7	16	21	19	0	0	0	0	0	0	1	1	1	18.2	0.7	255.58	2473	0	323.31	13.7	11.5	15	11.2	4.2	4	12.1	13.4	13.7	443500000000	414140000000	583630000000	86475000000	143140000000	127480000000	93515000000	58950000000
119	A0A087X1V2	Neural cell adhesion molecule 1 (Fragment)	NCAM1	A0A087X1V2;H7BYX6;A0A087WTE4;A0A087WTF6;A0A087WX77;A0A087WWD4;A0A087WV75;P13591	tr|A0A087X1V2|A0A087X1V2_HUMAN Neural cell adhesion molecule 1 (Fragment) OS=Homo sapiens OX=9606 GN=NCAM1 PE=1 SV=6;tr|H7BYX6|H7BYX6_HUMAN Neural cell adhesion molecule 1 OS=Homo sapiens OX=9606 GN=NCAM1 PE=1 SV=2;tr|A0A087WTE4|A0A087WTE4_HUMAN Neural cel	8	1	1	0	0	0	1	0	0	0	1	1	0	0	0	1	0	0	0	1	1	6.1	6.1	25.131	228	0	3.0869	0	0	0	6.1	0	0	0	6.1	6.1	0	0	0	4516800	0	0	0	0
56	A0A088QF11	Choline transporter-like protein 2 isoform 2	SLC44A2	A0A088QF11;A0A088QCU6;A0A024R798;A0A024R7D2;Q8IWA5;K7ESF5	tr|A0A088QF11|A0A088QF11_HUMAN Choline transporter-like protein 2 isoform 2 OS=Homo sapiens OX=9606 GN=SLC44A2 PE=3 SV=1;tr|A0A088QCU6|A0A088QCU6_HUMAN Choline transporter-like protein 2 isoform 2 OS=Homo sapiens OX=9606 GN=SLC44A2 PE=2 SV=1;tr|A0A024R798|	7	3	3	3	3	2	3	3	3	3	3	3	3	3	2	3	3	3	3	3	3	6.1	6.1	79.907	704	0	220.6	6.1	6.1	3.6	6.1	6.1	6.1	6.1	6.1	6.1	152750000	254590000	248110000	317040000	203070000	418240000	309360000	334130000
151	A0A0A0MS09	Immunoglobulin heavy constant delta (Fragment)	IGHD	A0A0A0MS09;Q8NF20;P0DOX3;P01880	tr|A0A0A0MS09|A0A0A0MS09_HUMAN Immunoglobulin heavy constant delta (Fragment) OS=Homo sapiens OX=9606 GN=IGHD PE=1 SV=1;tr|Q8NF20|Q8NF20_HUMAN FLJ00382 protein (Fragment) OS=Homo sapiens OX=9606 GN=FLJ00382 PE=2 SV=1;sp|P0DOX3|IGD_HUMAN Immunoglobulin delt	4	1	1	0	0	0	0	0	0	0	1	1	0	0	0	0	0	0	0	1	1	1.6	1.6	47.428	430	0	1.9483	0	0	0	0	0	0	0	1.6	1.6	0	0	0	0	0	0	0	0
156	A0A0A0MTT8	Growth/differentiation factor 15 (Fragment)	GDF15	A0A0A0MTT8;Q99988	tr|A0A0A0MTT8|A0A0A0MTT8_HUMAN Growth/differentiation factor 15 (Fragment) OS=Homo sapiens OX=9606 GN=GDF15 PE=1 SV=1;sp|Q99988|GDF15_HUMAN Growth/differentiation factor 15 OS=Homo sapiens OX=9606 GN=GDF15 PE=1 SV=3	2	1	1	1	1	1	1	0	0	1	1	0	1	1	1	1	0	0	1	1	0	16.8	16.8	12.474	113	0	117.81	16.8	16.8	16.8	16.8	0	0	16.8	16.8	0	0	6388100	9499400	4619200	0	0	3271000	2626200
158	A0A0A6YY99	Protein TNFSF12-TNFSF13	TNFSF12-TNFSF13	A0A0A6YY99;Q6U6I7;C9JF68;A0A0U5EM56;Q4ACW9;Q8NFH7;Q6FGR7;Q6FGN4;A0A0U5J5F5;O43508;O75888	tr|A0A0A6YY99|A0A0A6YY99_HUMAN Protein TNFSF12-TNFSF13 OS=Homo sapiens OX=9606 GN=TNFSF12-TNFSF13 PE=3 SV=1;tr|Q6U6I7|Q6U6I7_HUMAN APRIL (Fragment) OS=Homo sapiens OX=9606 PE=2 SV=1;tr|C9JF68|C9JF68_HUMAN Tumor necrosis factor ligand superfamily member 13	11	2	2	2	2	2	1	1	1	1	1	1	2	2	2	1	1	1	1	1	1	7	7	36.588	330	0	19.131	7	7	7	4.5	4.5	4.5	4.5	4.5	4.5	132980000	138200000	63723000	14204000	61776000	42016000	0	10962000
126	A0A0C4DGM1	Tryptase alpha/beta-1 (Fragment)	TPSAB1	A0A0C4DGM1;Q6FHB8;Q6B051;A0A384MTT9;A0A140VJT7;Q6NZY1;J3QTS8;A0A087WUI4;A0A087X1U0;Q15661;P20231	tr|A0A0C4DGM1|A0A0C4DGM1_HUMAN Tryptase alpha/beta-1 (Fragment) OS=Homo sapiens OX=9606 GN=TPSAB1 PE=1 SV=1;tr|Q6FHB8|Q6FHB8_HUMAN TPSB2 protein (Fragment) OS=Homo sapiens OX=9606 GN=TPSB2 PE=2 SV=1;tr|Q6B051|Q6B051_HUMAN Tryptase alpha/beta 1 OS=Homo sapi	11	1	1	0	0	0	1	0	0	0	0	0	0	0	0	1	0	0	0	0	0	13.1	13.1	23.895	213	0	2.9698	0	0	0	13.1	0	0	0	0	0	0	0	0	0	0	0	0	0
165	A0A0C4DGX7	GDP-fucose protein O-fucosyltransferase 2	POFUT2	A0A0C4DGX7;H7C2T5;A8K3W7;Q9Y2G5	tr|A0A0C4DGX7|A0A0C4DGX7_HUMAN GDP-fucose protein O-fucosyltransferase 2 OS=Homo sapiens OX=9606 GN=POFUT2 PE=1 SV=1;tr|H7C2T5|H7C2T5_HUMAN GDP-fucose protein O-fucosyltransferase 2 (Fragment) OS=Homo sapiens OX=9606 GN=POFUT2 PE=1 SV=1;tr|A8K3W7|A8K3W7_HU	4	1	1	1	1	1	0	1	1	1	1	0	1	1	1	0	1	1	1	1	0	7.1	7.1	16.478	141	0	51.083	7.1	7.1	7.1	0	7.1	7.1	7.1	7.1	0	0	13115000	17832000	0	32293000	5840500	54947000	79849000
167	A0A0C4DH07	Latent-transforming growth factor beta-binding protein 4	LTBP4	A0A0C4DH07;Q8N2S1	tr|A0A0C4DH07|A0A0C4DH07_HUMAN Latent-transforming growth factor beta-binding protein 4 OS=Homo sapiens OX=9606 GN=LTBP4 PE=1 SV=1;sp|Q8N2S1|LTBP4_HUMAN Latent-transforming growth factor beta-binding protein 4 OS=Homo sapiens OX=9606 GN=LTBP4 PE=1 SV=2	2	1	1	0	0	1	1	0	0	0	1	0	0	0	1	1	0	0	0	1	0	1	1	169.46	1587	0	211.56	0	0	1	1	0	0	0	1	0	0	0	3612900	7553400	0	0	0	0
171	A0A0G2JMB2	Immunoglobulin heavy constant alpha 2 (Fragment)	IGHA2	A0A0G2JMB2;Q6MZV6;Q7Z374;Q6MZX9;Q6P089;Q6ZVX0;Q7Z379;Q9NPP6;Q9UP60;Q8NCL6;Q6N092;Q6ZW64;Q96K68;Q96DK0;Q8WY24;Q6N090;Q6MZW0;P01876	tr|A0A0G2JMB2|A0A0G2JMB2_HUMAN Immunoglobulin heavy constant alpha 2 (Fragment) OS=Homo sapiens OX=9606 GN=IGHA2 PE=1 SV=1;tr|Q6MZV6|Q6MZV6_HUMAN Uncharacterized protein DKFZp686L19235 OS=Homo sapiens OX=9606 GN=DKFZp686L19235 PE=2 SV=1;tr|Q7Z374|Q7Z374_HU	18	2	1	1	1	1	2	1	1	1	1	1	0	0	0	1	0	0	0	0	0	9.1	6.5	36.508	340	0	3.864	2.6	2.6	2.6	9.1	2.6	2.6	2.6	2.6	2.6	0	0	0	18135000	0	0	0	0
132	A0A0G2JP90	Nodal modulator 1	NOMO1	A0A0G2JP90;A0A087WW46;J3KN36;A0A0G2JN29;A0A087X117;Q15155;P69849;Q5JPE7;Q1LZN2	tr|A0A0G2JP90|A0A0G2JP90_HUMAN Nodal modulator 1 OS=Homo sapiens OX=9606 GN=NOMO1 PE=1 SV=1;tr|A0A087WW46|A0A087WW46_HUMAN Nodal modulator 1 OS=Homo sapiens OX=9606 GN=NOMO1 PE=1 SV=1;tr|J3KN36|J3KN36_HUMAN Nodal modulator 3 OS=Homo sapiens OX=9606 GN=NOMO	9	2	2	0	0	0	2	0	0	0	0	0	0	0	0	2	0	0	0	0	0	3.1	3.1	122.18	1100	0	2.2696	0	0	0	3.1	0	0	0	0	0	0	0	0	8703900	0	0	0	0
51	A0A0G2JRN3	Alpha-1-antitrypsin	SERPINA1	A0A0G2JRN3;E9KL23;A0A384MDQ7;A0A024R6I7;P01009;Q2L9S7;G3V2B9;A0A0B4J278;G3V544;Q13747	tr|A0A0G2JRN3|A0A0G2JRN3_HUMAN Alpha-1-antitrypsin OS=Homo sapiens OX=9606 GN=SERPINA1 PE=1 SV=1;tr|E9KL23|E9KL23_HUMAN Epididymis secretory sperm binding protein Li 44a OS=Homo sapiens OX=9606 GN=SERPINA1 PE=2 SV=1;tr|A0A384MDQ7|A0A384MDQ7_HUMAN Epididymi	10	2	2	1	2	2	2	1	1	2	1	1	1	2	2	2	1	1	2	1	1	13.4	13.4	40.234	359	0	129.11	4.5	13.4	13.4	13.4	4.5	4.5	13.4	4.5	4.5	784140000	1536200000	1274100000	1376900000	401190000	691980000	1066500000	1603100000
174	A0A0H3WBE8	Thrombospondin receptor (Fragment)	CD36	A0A0H3WBE8;A0A0G3VRE1;E9PLT1;B7Z6C3;E7EU05;D9IX65;D9IX64;B3KUB8;A4D1B1;P16671	tr|A0A0H3WBE8|A0A0H3WBE8_HUMAN Thrombospondin receptor (Fragment) OS=Homo sapiens OX=9606 GN=CD36 PE=3 SV=1;tr|A0A0G3VRE1|A0A0G3VRE1_HUMAN Thrombospondin receptor (Fragment) OS=Homo sapiens OX=9606 GN=CD36 PE=3 SV=1;tr|E9PLT1|E9PLT1_HUMAN Platelet glycopro	10	1	1	0	0	0	0	0	0	1	1	1	0	0	0	0	0	0	1	1	1	26.4	26.4	8.1258	72	0	53.072	0	0	0	0	0	0	26.4	26.4	26.4	0	0	0	0	0	0	13571000	19567000
176	A0A0J9YVX1	Sortilin (Fragment)	SORT1	A0A0J9YVX1;A0A0J9YX61;A8KAQ3;Q99523	tr|A0A0J9YVX1|A0A0J9YVX1_HUMAN Sortilin (Fragment) OS=Homo sapiens OX=9606 GN=SORT1 PE=1 SV=1;tr|A0A0J9YX61|A0A0J9YX61_HUMAN Sortilin (Fragment) OS=Homo sapiens OX=9606 GN=SORT1 PE=1 SV=3;tr|A8KAQ3|A8KAQ3_HUMAN Sortilin OS=Homo sapiens OX=9606 PE=2 SV=1;sp	4	1	1	0	0	0	0	0	1	0	0	0	0	0	0	0	0	1	0	0	0	20	20	6.5623	60	0.0049917	0.80196	0	0	0	0	0	20	0	0	0	0	0	0	0	0	0	0	0
77	A0A0K0Q2Z1	Serpin peptidase inhibitor clade C member 1	SERPINC1	A0A0K0Q2Z1;A0A024R944;A0A2S0BDD1;P01008;Q8TCE1	tr|A0A0K0Q2Z1|A0A0K0Q2Z1_HUMAN Serpin peptidase inhibitor clade C member 1 OS=Homo sapiens OX=9606 GN=SERPINC1 PE=2 SV=1;tr|A0A024R944|A0A024R944_HUMAN Serpin peptidase inhibitor, clade C (Antithrombin), member 1, isoform CRA_a OS=Homo sapiens OX=9606 GN=S	5	2	2	2	2	1	2	1	1	2	2	2	2	2	1	2	1	1	2	2	2	7.5	7.5	52.542	464	0	323.31	7.5	7.5	3.4	7.5	3.4	3.4	7.5	7.5	7.5	79315000	136200000	78820000	172790000	57216000	81877000	155930000	310450000
180	A0A0S2Z3H6	Cleft lip and palate associated transmembrane protein 1 isoform 1 (Fragment)	CLPTM1	A0A0S2Z3H6;A0A0S2Z3H2;O96005	tr|A0A0S2Z3H6|A0A0S2Z3H6_HUMAN Cleft lip and palate associated transmembrane protein 1 isoform 1 (Fragment) OS=Homo sapiens OX=9606 GN=CLPTM1 PE=2 SV=1;tr|A0A0S2Z3H2|A0A0S2Z3H2_HUMAN Cleft lip and palate associated transmembrane protein 1 isoform 2 OS=Homo	3	1	1	0	0	0	1	0	0	0	1	1	0	0	0	1	0	0	0	1	1	2.2	2.2	77.958	686	0	12.02	0	0	0	2.2	0	0	0	2.2	2.2	0	0	0	18214000	0	0	0	10470000
181	A0A0S2Z3X0	Hexosaminidase A isoform 2	HEXA	A0A0S2Z3X0;H3BU85;A0A0S2Z3L7;H3BTD4;Q9BVJ8;H3BS10;A0A0S2Z3W3;H3BP20;B4DVA7;P06865	tr|A0A0S2Z3X0|A0A0S2Z3X0_HUMAN Hexosaminidase A isoform 2 OS=Homo sapiens OX=9606 GN=HEXA PE=2 SV=1;tr|H3BU85|H3BU85_HUMAN Beta-hexosaminidase subunit alpha (Fragment) OS=Homo sapiens OX=9606 GN=HEXA PE=1 SV=1;tr|A0A0S2Z3L7|A0A0S2Z3L7_HUMAN Hexosaminidase	10	1	1	1	1	1	1	1	1	1	1	1	1	1	1	1	1	1	1	1	1	5.2	5.2	21.538	193	0	2.4229	5.2	5.2	5.2	5.2	5.2	5.2	5.2	5.2	5.2	82169000	34028000	31536000	64358000	91870000	68759000	51596000	52049000
189	A0A0U1RQT9	Synaptophysin-like protein 1 (Fragment)	SYPL1	A0A0U1RQT9;C9JYN0;A8K865;A4D0R1;Q16563	tr|A0A0U1RQT9|A0A0U1RQT9_HUMAN Synaptophysin-like protein 1 (Fragment) OS=Homo sapiens OX=9606 GN=SYPL1 PE=1 SV=1;tr|C9JYN0|C9JYN0_HUMAN Synaptophysin-like protein 1 OS=Homo sapiens OX=9606 GN=SYPL1 PE=1 SV=1;tr|A8K865|A8K865_HUMAN cDNA FLJ75789, highly si	5	2	2	1	1	2	1	0	0	1	1	1	1	1	2	1	0	0	1	1	1	27.4	27.4	14.967	135	0	121.75	12.6	12.6	27.4	14.8	0	0	14.8	14.8	14.8	61990000	101500000	161240000	73812000	0	0	85820000	73820000
191	A0A140T9H1	HLA class II histocompatibility antigen, DP alpha 1 chain (Fragment)	HLA-DPA1	A0A140T9H1;A0A140T914;A0A1L5LC20;X5CKE2;X5CMJ1;A0A172WC68;A0A172WC72;A0A172WC73;A0A172WCA5;A0A172WC71;A0A2U9K719;A0A140T9R4;A0A140T9U4;A0A140T9Y9;A0A140T9F8;A0A140T9D6;J3KQ99;A0A140C6V4;P20036	tr|A0A140T9H1|A0A140T9H1_HUMAN HLA class II histocompatibility antigen, DP alpha 1 chain (Fragment) OS=Homo sapiens OX=9606 GN=HLA-DPA1 PE=1 SV=1;tr|A0A140T914|A0A140T914_HUMAN HLA class II histocompatibility antigen, DP alpha 1 chain (Fragment) OS=Homo sa	19	1	1	0	0	0	1	0	1	0	0	0	0	0	0	1	0	1	0	0	0	8.6	8.6	24.059	209	0	5.2895	0	0	0	8.6	0	8.6	0	0	0	0	0	0	19559000	0	14504000	0	0
193	A0A140T9K6	Atypical chemokine receptor 3 (Fragment)	ACKR3	A0A140T9K6;P25106	tr|A0A140T9K6|A0A140T9K6_HUMAN Atypical chemokine receptor 3 (Fragment) OS=Homo sapiens OX=9606 GN=ACKR3 PE=1 SV=2;sp|P25106|ACKR3_HUMAN Atypical chemokine receptor 3 OS=Homo sapiens OX=9606 GN=ACKR3 PE=1 SV=3	2	1	1	0	0	0	1	0	0	1	1	0	0	0	0	1	0	0	1	1	0	6.2	6.2	24.166	210	0	49.712	0	0	0	6.2	0	0	6.2	6.2	0	0	0	0	2304800	0	0	1989400	7045300
195	A0A140VJJ6	Testicular tissue protein Li 70		A0A140VJJ6;C9JEU5;C9JC84;P02679;D3DP16;Q7Z664;C9JPQ9;C9JU00	tr|A0A140VJJ6|A0A140VJJ6_HUMAN Testicular tissue protein Li 70 OS=Homo sapiens OX=9606 PE=2 SV=1;tr|C9JEU5|C9JEU5_HUMAN Fibrinogen gamma chain OS=Homo sapiens OX=9606 GN=FGG PE=1 SV=1;tr|C9JC84|C9JC84_HUMAN Fibrinogen gamma chain OS=Homo sapiens OX=9606 GN	8	9	9	2	2	2	8	2	7	2	2	4	2	2	2	8	2	7	2	2	4	21.1	21.1	49.496	437	0	323.31	4.1	4.1	4.1	21.1	4.1	19.9	4.1	4.1	9.8	1335800000	1893700000	469320000	86803000000	4086500000	26437000000	1976200000	4087500000
197	A0A140VJU8	Superoxide dismutase [Cu-Zn] (EC 1.15.1.1)		A0A140VJU8;B2R9V7;P08294	tr|A0A140VJU8|A0A140VJU8_HUMAN Superoxide dismutase [Cu-Zn] OS=Homo sapiens OX=9606 PE=2 SV=1;tr|B2R9V7|B2R9V7_HUMAN Superoxide dismutase [Cu-Zn] OS=Homo sapiens OX=9606 PE=2 SV=1;sp|P08294|SODE_HUMAN Extracellular superoxide dismutase [Cu-Zn] OS=Homo sapi	3	1	1	1	1	1	1	1	1	1	1	1	1	1	1	1	1	1	1	1	1	7.9	7.9	25.851	240	0	125.52	7.9	7.9	7.9	7.9	7.9	7.9	7.9	7.9	7.9	2449700000	2542100000	2194700000	717910000	188430000	152970000	658660000	964550000
198	A0A140VJW3	Sushi domain containing 2, isoform CRA_a (Testicular tissue protein Li 190)	SUSD2 hCG_2043017	A0A140VJW3;Q9UGT4	tr|A0A140VJW3|A0A140VJW3_HUMAN Sushi domain containing 2, isoform CRA_a OS=Homo sapiens OX=9606 GN=SUSD2 PE=2 SV=1;sp|Q9UGT4|SUSD2_HUMAN Sushi domain-containing protein 2 OS=Homo sapiens OX=9606 GN=SUSD2 PE=1 SV=1	2	1	1	0	0	0	1	1	1	0	0	0	0	0	0	1	1	1	0	0	0	1.6	1.6	90.207	822	0.0052724	1.1424	0	0	0	1.6	1.6	1.6	0	0	0	0	0	0	10550000	10370000	10743000	0	0
202	A0A146E5L3	Mesenchymal stromal cell-and fibroblast-expressing Linx paralogue	Meflin	A0A146E5L3;O14498;H0YN67;H0YL90	tr|A0A146E5L3|A0A146E5L3_HUMAN Mesenchymal stromal cell-and fibroblast-expressing Linx paralogue OS=Homo sapiens OX=9606 GN=Meflin PE=2 SV=1;sp|O14498|ISLR_HUMAN Immunoglobulin superfamily containing leucine-rich repeat protein OS=Homo sapiens OX=9606 GN=I	4	2	2	0	0	0	2	0	0	1	1	0	0	0	0	2	0	0	1	1	0	8.9	8.9	45.997	428	0	33.12	0	0	0	8.9	0	0	3.7	3.7	0	0	0	0	116400000	0	0	24599000	0
168	A0A172Q3A0	Fibroblast activation protein (Fragment)		A0A172Q3A0;A0A0D9SEN1;B2RD89;A0A140GPP7;Q12884;B4DLR2	tr|A0A172Q3A0|A0A172Q3A0_HUMAN Fibroblast activation protein (Fragment) OS=Homo sapiens OX=9606 PE=2 SV=1;tr|A0A0D9SEN1|A0A0D9SEN1_HUMAN Prolyl endopeptidase FAP OS=Homo sapiens OX=9606 GN=FAP PE=1 SV=1;tr|B2RD89|B2RD89_HUMAN cDNA, FLJ96506, highly similar	9	5	5	0	0	0	4	2	3	2	4	2	0	0	0	4	2	3	2	4	2	7	7	84.875	733	0	291.63	0	0	0	7	3.1	4.9	3.1	5.9	3.1	0	0	0	87302000	57817000	41681000	49929000	87903000
44	A0A172Q3A8	Folate receptor (Fragment)		A0A172Q3A8;A0A024R5H1;P15328	tr|A0A172Q3A8|A0A172Q3A8_HUMAN Folate receptor (Fragment) OS=Homo sapiens OX=9606 PE=2 SV=1;tr|A0A024R5H1|A0A024R5H1_HUMAN Folate receptor 1 (Adult), isoform CRA_a OS=Homo sapiens OX=9606 GN=FOLR1 PE=4 SV=1;sp|P15328|FOLR1_HUMAN Folate receptor alpha OS=Ho	13	3	3	0	0	0	2	0	1	0	0	0	0	0	0	2	0	1	0	0	0	14.5	14.5	24.281	207	0	4.2692	0	0	0	7.7	0	6.8	0	0	0	0	0	0	18833000	0	0	0	0
2	A0A180H6N8	MHC class II antigen (Fragment)	HLA-DRB4	A0A180H6N8;A0A2U7NIC9;A0A2H4FZZ4;O19738;D1MYB6;A0A2U7NIB5;A0A2U7NN60;A0A2U7NN54;A0A2U7NN48;A0A2U7NID4;A0A2U7MWP7;Q9GIJ6;A0A2H4FZY3;A0A2U7MZR8;A0A2U7MWP1;A0A2H4FZY4;A0A2H4G0I9;A0A2U7MWP0;A0A2H4G0I2;A0A2H4G0H9;O19743;Q9GJ49;A0A1X9I5B8;A0A2U7N3J3;A0A2U7N3I7;Q9MYE4;A0A2U7N9V4;A0A2U7N9U9;A0A2U7N9U1;A0A2U7N6W5;A0A2U7N6V6;A0A2U7N3K0;A0A2U7MZU1;Q9NQ54;A0A2H4G2W1;A0A2U7MZT2;A0A2U7MZS7;A0A2H4FZX0;A0A2U7NH0…	tr|A0A180H6N8|A0A180H6N8_HUMAN MHC class II antigen (Fragment) OS=Homo sapiens OX=9606 GN=HLA-DRB4 PE=4 SV=1;tr|A0A2U7NIC9|A0A2U7NIC9_HUMAN MHC class II antigen (Fragment) OS=Homo sapiens OX=9606 GN=HLA-DRB4 PE=4 SV=1;tr|A0A2H4FZZ4|A0A2H4FZZ4_HUMAN MHC cla	172	1	1	0	0	0	1	0	0	0	0	0	0	0	0	1	0	0	0	0	0	20.4	20.4	6.5031	54	0.0018553	1.4957	0	0	0	20.4	0	0	0	0	0	0	0	0	3487500	0	0	0	0
115	A0A180H729	MHC class II antigen (Fragment)	HLA-DPB1	A0A180H729;A0A0A7C596;A0A1C8DV15;A0A1C8DTY9;A0A1C8DTX3;A0A1C8DTW6;A0A1C8DTG8;A0A1C8DTF9;A0A1C8DTF2;A0A1C8DTE6;A0A1C8DTD8;A0A1C8DTB3;A0A1C8DSX4;A0A1C8DTY2;A0A1C8DTZ7;A0A1X9I4L2;A0A1X9I4M1;A0A0A7C578;A0A0A7C582;A0A0A7C583;A0A0A7C585;I3RVA4;A0A0A7C588;A0A0A7C592;H2A3H7;A0A0A7C593;A0A0A7C577;A0A0A7C595;A0A0A7C5K9;E1Y7U4;A0A1C8DU09;A0A1C8DUV9;A0A1C8DUU3;A0A0A7C650;A0A1C8DSU5;A0A1C8DSU0;A0A1C8DST7;A0A1…	tr|A0A180H729|A0A180H729_HUMAN MHC class II antigen (Fragment) OS=Homo sapiens OX=9606 GN=HLA-DPB1 PE=4 SV=1;tr|A0A0A7C596|A0A0A7C596_HUMAN MHC class II antigen (Fragment) OS=Homo sapiens OX=9606 GN=HLA-DPB1 PE=4 SV=1;tr|A0A1C8DV15|A0A1C8DV15_HUMAN MHC cla	1940	1	1	0	0	0	1	0	0	0	0	0	0	0	0	1	0	0	0	0	0	20.8	20.8	6.525	53	0	4.2782	0	0	0	20.8	0	0	0	0	0	0	0	0	45412000	0	0	0	0
205	A0A182DWH8	Selenoprotein P (Fragment)	SELENOP	A0A182DWH8;A0A182DWH7;P49908	tr|A0A182DWH8|A0A182DWH8_HUMAN Selenoprotein P (Fragment) OS=Homo sapiens OX=9606 GN=SELENOP PE=1 SV=1;tr|A0A182DWH7|A0A182DWH7_HUMAN Selenoprotein P (Fragment) OS=Homo sapiens OX=9606 GN=SELENOP PE=1 SV=1;sp|P49908|SEPP1_HUMAN Selenoprotein P OS=Homo sapi	3	2	2	0	0	0	2	0	0	1	1	1	0	0	0	2	0	0	1	1	1	21.1	21.1	23.657	209	0	28.009	0	0	0	21.1	0	0	9.1	9.1	9.1	0	0	0	18426000	0	0	13518000	8175500
200	A0A1B0GTU3	Kinesin-like protein KIF16B	KIF16B	A0A1B0GTU3;A0A140VK74;Q96L93	tr|A0A1B0GTU3|A0A1B0GTU3_HUMAN Kinesin-like protein KIF16B OS=Homo sapiens OX=9606 GN=KIF16B PE=1 SV=1;tr|A0A140VK74|A0A140VK74_HUMAN Testis secretory sperm-binding protein Li 201a OS=Homo sapiens OX=9606 PE=2 SV=1;sp|Q96L93|KI16B_HUMAN Kinesin-like protei	3	1	1	0	0	0	0	0	0	1	0	0	0	0	0	0	0	0	1	0	0	1.6	1.6	146.32	1266	1	-2	0	0	0	0	0	0	1.6	0	0	0	0	0	0	0	0	42369000	0
209	A0A1B0GTY3	A disintegrin and metalloproteinase with thrombospondin motifs 2	ADAMTS2	A0A1B0GTY3;O95450	tr|A0A1B0GTY3|A0A1B0GTY3_HUMAN A disintegrin and metalloproteinase with thrombospondin motifs 2 OS=Homo sapiens OX=9606 GN=ADAMTS2 PE=1 SV=2;sp|O95450|ATS2_HUMAN A disintegrin and metalloproteinase with thrombospondin motifs 2 OS=Homo sapiens OX=9606 GN=AD	2	1	1	0	0	0	1	0	0	0	1	0	0	0	0	1	0	0	0	1	0	1	1	121.35	1094	0.0065147	0.7137	0	0	0	1	0	0	0	1	0	0	0	0	1996900	0	0	0	0
207	A0A1B0GV06	Acid ceramidase (Fragment)	ASAH1	A0A1B0GV06;A0A1B0GUB3;A8K0B6;A0A1B0GUH5;A0A1B0GTZ5;A0A1B0GTM3;A0A1B0GUA4;A0A1B0GW68;E7EMM4;A0A1B0GUW4;A0A1B0GUG1;A0A1B0GVG2;A0A1B0GUE3;B3KUZ6;A0A1B0GTP7;D3DSQ1;Q13510;Q53H01	tr|A0A1B0GV06|A0A1B0GV06_HUMAN Acid ceramidase (Fragment) OS=Homo sapiens OX=9606 GN=ASAH1 PE=1 SV=1;tr|A0A1B0GUB3|A0A1B0GUB3_HUMAN Acid ceramidase (Fragment) OS=Homo sapiens OX=9606 GN=ASAH1 PE=1 SV=1;tr|A8K0B6|A8K0B6_HUMAN cDNA FLJ77858, highly similar t	18	2	2	1	1	1	2	1	1	1	1	1	1	1	1	2	1	1	1	1	1	17.5	17.5	22.837	200	0	31.826	6.5	6.5	6.5	17.5	6.5	6.5	6.5	6.5	6.5	25654000	39213000	22973000	36733000	0	21046000	0	25706000
211	A0A1B0RPQ5	Anosmin-1 (EC 3.4.21.4)	ANOS1	A0A1B0RPQ5;P23352	tr|A0A1B0RPQ5|A0A1B0RPQ5_HUMAN Anosmin-1 OS=Homo sapiens OX=9606 GN=ANOS1 PE=2 SV=1;sp|P23352|KALM_HUMAN Anosmin-1 OS=Homo sapiens OX=9606 GN=ANOS1 PE=1 SV=3	2	2	2	2	2	2	2	2	2	2	2	2	2	2	2	2	2	2	2	2	2	3.5	3.5	76.21	680	0	47.316	3.5	3.5	3.5	3.5	3.5	3.5	3.5	3.5	3.5	170730000	90348000	106770000	17855000	22593000	38890000	66027000	52238000
212	A0A1B1SMR9	Collagen type IX alpha 1	COL9A1	A0A1B1SMR9;P20849	tr|A0A1B1SMR9|A0A1B1SMR9_HUMAN Collagen type IX alpha 1 OS=Homo sapiens OX=9606 GN=COL9A1 PE=4 SV=1;sp|P20849|CO9A1_HUMAN Collagen alpha-1(IX) chain OS=Homo sapiens OX=9606 GN=COL9A1 PE=1 SV=3	2	2	2	0	1	1	1	0	2	1	1	0	0	1	1	1	0	2	1	1	0	3.4	3.4	93.587	931	0	238.77	0	2.6	2.6	2.6	0	3.4	2.6	2.6	0	0	0	157230000	196360000	0	123060000	211330000	71231000
213	A0A1I9LHJ2	Sulfotransferase (EC 2.8.2.-)	CHST6	A0A1I9LHJ2;A0A1I9LHJ1;A0A1I9LHJ0;Q9GZX3	tr|A0A1I9LHJ2|A0A1I9LHJ2_HUMAN Sulfotransferase OS=Homo sapiens OX=9606 GN=CHST6 PE=3 SV=1;tr|A0A1I9LHJ1|A0A1I9LHJ1_HUMAN Sulfotransferase OS=Homo sapiens OX=9606 GN=CHST6 PE=3 SV=1;tr|A0A1I9LHJ0|A0A1I9LHJ0_HUMAN Sulfotransferase OS=Homo sapiens OX=9606 GN	4	2	2	1	1	2	1	0	0	1	1	1	1	1	2	1	0	0	1	1	1	5.8	5.8	44.088	395	0	77.783	2.5	2.5	5.8	2.5	0	0	2.5	2.5	2.5	0	8612600	8844100	4468500	0	0	36415000	16524000
214	A0A1S5UZ16	Target of Nesh-SH3	ABI3BP	A0A1S5UZ16;D3YTG3;Q7Z7G0;Q9H717;Q5JPC9;H7C4X4	tr|A0A1S5UZ16|A0A1S5UZ16_HUMAN Target of Nesh-SH3 OS=Homo sapiens OX=9606 GN=ABI3BP PE=2 SV=1;tr|D3YTG3|D3YTG3_HUMAN Target of Nesh-SH3 OS=Homo sapiens OX=9606 GN=ABI3BP PE=1 SV=1;sp|Q7Z7G0|TARSH_HUMAN Target of Nesh-SH3 OS=Homo sapiens OX=9606 GN=ABI3BP P	11	8	8	5	6	5	5	6	6	5	6	5	5	6	5	5	6	6	5	6	5	10.7	10.7	121.2	1100	0	167.89	6.3	8.3	5.6	6.3	8.3	8.3	6.3	8.4	6.3	1046900000	812430000	574790000	1913000000	1940500000	1743200000	1624400000	595020000
218	A0A1W2PNW4	Vascular endothelial growth factor receptor 1	FLT1	A0A1W2PNW4;L7RSL3;P17948	tr|A0A1W2PNW4|A0A1W2PNW4_HUMAN Vascular endothelial growth factor receptor 1 OS=Homo sapiens OX=9606 GN=FLT1 PE=1 SV=1;tr|L7RSL3|L7RSL3_HUMAN Fms-related tyrosine kinase 1 (Vascular endothelial growth factor/vascular permeability factor receptor) OS=Homo s	4	4	4	3	2	1	0	0	0	3	3	3	3	2	1	0	0	0	3	3	3	7.4	7.4	74.925	665	0	18.587	5.7	4.1	2.6	0	0	0	4.8	5.9	5.7	24009000	19327000	18163000	0	0	0	0	16300000
102	A0A1W2PQR6	Lysosome membrane protein 2	SCARB2	A0A1W2PQR6;A0A1W2PQB7;A0A1W2PS43;A0A024RDG6;A0A1W2PRS1;Q14108;A0A1W2PRF6;A0A1W2PPX5;A0A1W2PPU6	tr|A0A1W2PQR6|A0A1W2PQR6_HUMAN Lysosome membrane protein 2 OS=Homo sapiens OX=9606 GN=SCARB2 PE=1 SV=1;tr|A0A1W2PQB7|A0A1W2PQB7_HUMAN Lysosome membrane protein 2 OS=Homo sapiens OX=9606 GN=SCARB2 PE=1 SV=1;tr|A0A1W2PS43|A0A1W2PS43_HUMAN Lysosome membrane p	14	3	3	3	1	1	3	1	3	3	3	2	3	1	1	3	1	3	3	3	2	11.8	11.8	51.049	449	0	117.96	11.8	4	3.8	11.8	3.8	11.8	11.8	11.8	8	45029000	25580000	0	113390000	76507000	65473000	127530000	219370000
224	A0A286YEY4	Immunoglobulin heavy constant gamma 2 (Fragment)	IGHG2	A0A286YEY4;Q6N093;Q6MZU6;Q68CN4;P01859	tr|A0A286YEY4|A0A286YEY4_HUMAN Immunoglobulin heavy constant gamma 2 (Fragment) OS=Homo sapiens OX=9606 GN=IGHG2 PE=1 SV=1;tr|Q6N093|Q6N093_HUMAN Uncharacterized protein DKFZp686I04196 (Fragment) OS=Homo sapiens OX=9606 GN=DKFZp686I04196 PE=2 SV=1;tr|Q6MZU	5	2	0	1	1	1	2	1	1	1	1	1	0	0	0	0	0	0	0	0	0	6.3	0	43.805	395	1	-2	2.3	2.3	2.3	6.3	2.3	2.3	2.3	2.3	2.3	0	0	0	1279900	0	0	0	0
225	A0A286YEY5	Immunoglobulin heavy constant alpha 2 (Fragment)	IGHA2	A0A286YEY5;P0DOX2;Q6N041;Q6N091;P01877	tr|A0A286YEY5|A0A286YEY5_HUMAN Immunoglobulin heavy constant alpha 2 (Fragment) OS=Homo sapiens OX=9606 GN=IGHA2 PE=1 SV=1;sp|P0DOX2|IGA2_HUMAN Immunoglobulin alpha-2 heavy chain OS=Homo sapiens OX=9606 PE=1 SV=2;tr|Q6N041|Q6N041_HUMAN Uncharacterized prot	5	2	1	1	2	1	2	2	1	1	2	2	0	1	0	1	1	0	0	1	1	5.9	3.6	42.333	391	0	149.51	2.3	5.9	2.3	5.9	5.9	2.3	2.3	5.9	5.9	18150000	65731000	8136600	102860000	62897000	181560000	53324000	163640000
192	A0A2K9UYS7	MHC class II antigen	HLA-DPA1	A0A2K9UYS7;A0A172WCC2;A0A172WC90;A0A172WC80;A0A172WC77;A0A172WC74;Q95HB9;I2G9G1;A0A2U9K708;A0A2K9UYS6;A0A140EDI6	tr|A0A2K9UYS7|A0A2K9UYS7_HUMAN MHC class II antigen OS=Homo sapiens OX=9606 GN=HLA-DPA1 PE=3 SV=1;tr|A0A172WCC2|A0A172WCC2_HUMAN MHC class II antigen (Fragment) OS=Homo sapiens OX=9606 GN=HLA-DPA1 PE=3 SV=1;tr|A0A172WC90|A0A172WC90_HUMAN MHC class II antig	11	1	1	0	0	0	1	0	1	0	0	0	0	0	0	1	0	1	0	0	0	6.9	6.9	29.206	259	0.0052539	1.1104	0	0	0	6.9	0	6.9	0	0	0	0	0	0	3691700	0	13027000	0	0
230	A0A2P9AT05	Uncharacterized protein	BQ8482_400015	A0A2P9AT05	tr|A0A2P9AT05|A0A2P9AT05_HUMAN Uncharacterized protein OS=Homo sapiens OX=9606 GN=BQ8482_400015 PE=3 SV=1	1	1	1	0	0	0	0	0	0	0	1	0	0	0	0	0	0	0	0	1	0	3.3	3.3	73.436	666	0.0051195	0.90093	0	0	0	0	0	0	0	3.3	0	0	0	0	0	0	0	0	0
232	A0A2P9AUM2	D-amino acid dehydrogenase 3 small subunit (EC 1.4.99.6)	dadA BQ8482_520005	A0A2P9AUM2	tr|A0A2P9AUM2|A0A2P9AUM2_HUMAN D-amino acid dehydrogenase 3 small subunit OS=Homo sapiens OX=9606 GN=dadA PE=4 SV=1	1	1	1	0	0	0	0	0	0	1	1	1	0	0	0	0	0	0	1	1	1	2.9	2.9	46.793	417	0.005	0.80722	0	0	0	0	0	0	2.9	2.9	2.9	0	0	0	0	0	0	9516600	6235700
234	A0A2R8Y484	Leukocyte surface antigen CD47 (Fragment)	CD47	A0A2R8Y484;A0A0A1TSG4;Q08722	tr|A0A2R8Y484|A0A2R8Y484_HUMAN Leukocyte surface antigen CD47 (Fragment) OS=Homo sapiens OX=9606 GN=CD47 PE=1 SV=1;tr|A0A0A1TSG4|A0A0A1TSG4_HUMAN CD47 OS=Homo sapiens OX=9606 GN=CD47 PE=2 SV=1;sp|Q08722|CD47_HUMAN Leukocyte surface antigen CD47 OS=Homo sap	3	4	4	2	4	2	3	1	1	2	3	2	2	4	2	3	1	1	2	3	2	23	23	20.313	183	0	323.31	16.4	23	16.4	22.4	10.4	10.4	16.4	22.4	16.4	220410000	213370000	194580000	274040000	27601000	230170000	424930000	340200000
185	A0A2R8Y5L4	Epsilon-sarcoglycan (Fragment)	SGCE	A0A2R8Y5L4;A0A2R8Y2R1;A0A2R8Y4E3;A0A2R8Y4X1;A0A2R8Y6U6;A0A2R8YH84;A0A2R8Y5X5;A0A2R8Y5J3;A0A2R8Y4P8;B7Z2R4;A0A2R8YD68;A0A2R8YGQ3;A0A2R8Y652;A0A2R8YEY2;A0A2R8Y5J6;A0A2R8Y5X0;A0A2R8Y638;A0A2R8Y5R7;A0A2R8Y5M2;A0A2R8YE48;A0A2R8YFA5;A0A2R8Y5Q3;A0A2R8Y7J1;A0A2R8Y6S4;A0A2R8Y5P8;A0A2R8Y6Y5;A0A2R8Y7Q5;A0A2R8Y6G8;A0A2R8Y448;A0A2R8Y6D4;B4DP78;E9PEH6;A0A2R8Y5H7;A0A2R8YE16;A0A2R8YE99;A0A2R8Y821;A0A2R8Y416;A0A2…	tr|A0A2R8Y5L4|A0A2R8Y5L4_HUMAN Epsilon-sarcoglycan (Fragment) OS=Homo sapiens OX=9606 GN=SGCE PE=1 SV=1;tr|A0A2R8Y2R1|A0A2R8Y2R1_HUMAN Epsilon-sarcoglycan (Fragment) OS=Homo sapiens OX=9606 GN=SGCE PE=1 SV=1;tr|A0A2R8Y4E3|A0A2R8Y4E3_HUMAN Epsilon-sarcoglyc	45	1	1	1	0	0	1	1	1	0	0	0	1	0	0	1	1	1	0	0	0	7.5	7.5	18.182	161	0	3.7905	7.5	0	0	7.5	7.5	7.5	0	0	0	0	0	0	6744700	0	0	0	0
190	A0A2R8Y5Q7	Natural resistance-associated macrophage protein 2 (Fragment)	SLC11A2	A0A2R8Y5Q7;B3KY44;F8W1P7;B7Z9M2;A0A0X8GKR4;A0A2R8YD71;P49281	tr|A0A2R8Y5Q7|A0A2R8Y5Q7_HUMAN Natural resistance-associated macrophage protein 2 (Fragment) OS=Homo sapiens OX=9606 GN=SLC11A2 PE=1 SV=1;tr|B3KY44|B3KY44_HUMAN Solute carrier family 11 (Proton-coupled divalent metal ion transporters), member 2, isoform CR	7	1	1	0	0	0	1	0	0	0	0	0	0	0	0	1	0	0	0	0	0	6.6	6.6	36.297	331	0.0049751	0.78028	0	0	0	6.6	0	0	0	0	0	0	0	0	0	0	0	0	0
37	A0A2R8Y6G6	Alpha-enolase	ENO1	A0A2R8Y6G6;A0A024R4F1;P06733;E2DRY6;A0A2R8YEM5;K7EM90	tr|A0A2R8Y6G6|A0A2R8Y6G6_HUMAN Alpha-enolase OS=Homo sapiens OX=9606 GN=ENO1 PE=1 SV=1;tr|A0A024R4F1|A0A024R4F1_HUMAN Enolase 1, (Alpha), isoform CRA_a OS=Homo sapiens OX=9606 GN=ENO1 PE=2 SV=1;sp|P06733|ENOA_HUMAN Alpha-enolase OS=Homo sapiens OX=9606 GN=	12	4	4	1	1	1	0	0	1	0	3	0	1	1	1	0	0	1	0	3	0	17.7	17.7	47.327	434	0	78.908	4.6	4.6	4.6	0	0	3.2	0	14.5	0	37151000	23484000	17027000	0	0	0	0	0
237	A0A2R8YCX5	Semaphorin-3E	SEMA3E	A0A2R8YCX5;B4DLY1;O15041	tr|A0A2R8YCX5|A0A2R8YCX5_HUMAN Semaphorin-3E OS=Homo sapiens OX=9606 GN=SEMA3E PE=1 SV=1;tr|B4DLY1|B4DLY1_HUMAN cDNA FLJ60682, highly similar to Semaphorin-3E OS=Homo sapiens OX=9606 PE=2 SV=1;sp|O15041|SEM3E_HUMAN Semaphorin-3E OS=Homo sapiens OX=9606 GN=	3	3	3	1	2	0	0	0	0	1	1	0	1	2	0	0	0	0	1	1	0	5.6	5.6	71.772	630	0	14.529	3.3	4.4	0	0	0	0	1.1	1.1	0	44593000	43503000	0	0	0	0	0	0
238	A0A2R8YGD1	Tripeptidyl-peptidase 1	TPP1	A0A2R8YGD1;B4E0C7;A0A2R8YD45;B2R608;D3DQU2;B4DIV8;O14773;B4DE89;B4DSE2;A0A2R8Y7U1;Q53HP2	tr|A0A2R8YGD1|A0A2R8YGD1_HUMAN Tripeptidyl-peptidase 1 OS=Homo sapiens OX=9606 GN=TPP1 PE=1 SV=1;tr|B4E0C7|B4E0C7_HUMAN cDNA FLJ58558, highly similar to Tripeptidyl-peptidase 1 OS=Homo sapiens OX=9606 PE=2 SV=1;tr|A0A2R8YD45|A0A2R8YD45_HUMAN Tripeptidyl-pe	11	2	2	0	0	0	2	1	1	1	0	0	0	0	0	2	1	1	1	0	0	11.9	11.9	50.889	470	0	138.78	0	0	0	11.9	4	4	4	0	0	0	0	0	19847000	0	0	0	0
242	A0A384MDM4	Epididymis secretory sperm binding protein		A0A384MDM4;P35555;B4E3I6	tr|A0A384MDM4|A0A384MDM4_HUMAN Epididymis secretory sperm binding protein OS=Homo sapiens OX=9606 PE=2 SV=1;sp|P35555|FBN1_HUMAN Fibrillin-1 OS=Homo sapiens OX=9606 GN=FBN1 PE=1 SV=3;tr|B4E3I6|B4E3I6_HUMAN cDNA FLJ61597, highly similar to Fibrillin-1 (Frag	12	7	7	2	3	3	7	2	3	5	5	5	2	3	3	7	2	3	5	5	5	3.6	3.6	312.24	2871	0	253.28	1.1	1.4	1.4	3.6	0.8	1.4	2.8	2.8	2.8	175570000	222890000	255670000	7136900000	1066000000	988730000	1459500000	653260000
243	A0A384MDP3	Epididymis secretory sperm binding protein		A0A384MDP3;P12110;Q9BUM6	tr|A0A384MDP3|A0A384MDP3_HUMAN Epididymis secretory sperm binding protein OS=Homo sapiens OX=9606 PE=2 SV=1;sp|P12110|CO6A2_HUMAN Collagen alpha-2(VI) chain OS=Homo sapiens OX=9606 GN=COL6A2 PE=1 SV=4;tr|Q9BUM6|Q9BUM6_HUMAN COL6A2 protein OS=Homo sapiens O	7	16	16	4	4	3	14	6	5	8	9	8	4	4	3	14	6	5	8	9	8	22.5	22.5	108.58	1019	0	323.31	6.4	7.9	5.4	19.1	11	8.5	13.2	13.2	12.9	4093500000	5219800000	2349400000	18621000000	8946000000	10447000000	11498000000	6536500000
245	A0A384MDV6	Carboxypeptidase Z, isoform CRA_b (Epididymis secretory sperm binding protein)	CPZ hCG_16447	A0A384MDV6;Q66K79	tr|A0A384MDV6|A0A384MDV6_HUMAN Carboxypeptidase Z, isoform CRA_b OS=Homo sapiens OX=9606 GN=CPZ PE=2 SV=1;sp|Q66K79|CBPZ_HUMAN Carboxypeptidase Z OS=Homo sapiens OX=9606 GN=CPZ PE=1 SV=2	2	2	2	0	0	0	2	0	1	0	0	0	0	0	0	2	0	1	0	0	0	3.8	3.8	73.627	652	0	6.264	0	0	0	3.8	0	2.9	0	0	0	0	0	0	6528500	0	40631000	0	0
250	A0A384NKS6	Clusterin		A0A384NKS6;P10909;E7ETB4;E7ERK6;H0YLK8	tr|A0A384NKS6|A0A384NKS6_HUMAN Epididymis secretory sperm binding protein OS=Homo sapiens OX=9606 PE=2 SV=1;sp|P10909|CLUS_HUMAN Clusterin OS=Homo sapiens OX=9606 GN=CLU PE=1 SV=1;tr|E7ETB4|E7ETB4_HUMAN Clusterin (Fragment) OS=Homo sapiens OX=9606 GN=CLU P	15	20	18	14	16	16	9	6	8	11	15	13	13	15	16	9	6	8	11	14	12	40.5	34.9	57.832	501	0	323.31	30.9	31.1	30.7	15.8	10.4	19.4	21	30.1	25.9	198880000000	205650000000	300610000000	24736000000	23050000000	20101000000	44540000000	34677000000
254	A0A3B3IRL2	Cellular repressor of E1A-stimulated genes 1, isoform CRA_a (Protein CREG1)	CREG1 hCG_41319	A0A3B3IRL2;B3KQR3;O75629	tr|A0A3B3IRL2|A0A3B3IRL2_HUMAN Cellular repressor of E1A-stimulated genes 1, isoform CRA_a OS=Homo sapiens OX=9606 GN=CREG1 PE=4 SV=1;tr|B3KQR3|B3KQR3_HUMAN cDNA PSEC0065 fis, clone NT2RP2000997, highly similar to Protein CREG1 OS=Homo sapiens OX=9606 PE=2	3	1	1	0	1	1	1	0	0	1	1	1	0	1	1	1	0	0	1	1	1	3.9	3.9	28.058	255	0	2.3776	0	3.9	3.9	3.9	0	0	3.9	3.9	3.9	0	15357000	7339100	9973700	0	0	6598000	19014000
80	A0A3B3IRN5	Fibromodulin	FMOD	A0A3B3IRN5;B4E1J3;A0A024R971;Q06828;B3KS64	tr|A0A3B3IRN5|A0A3B3IRN5_HUMAN Fibromodulin OS=Homo sapiens OX=9606 GN=FMOD PE=4 SV=1;tr|B4E1J3|B4E1J3_HUMAN cDNA FLJ53615, highly similar to Fibromodulin OS=Homo sapiens OX=9606 PE=2 SV=1;tr|A0A024R971|A0A024R971_HUMAN Epididymis secretory sperm binding p	7	12	12	10	10	11	8	7	6	7	9	11	10	10	11	8	7	6	7	9	11	76.3	76.3	32.768	287	0	323.31	69.7	69.7	73.9	56.4	46.7	39	55.7	66.6	69.3	189480000000	148340000000	166360000000	38412000000	124960000000	65301000000	55182000000	35429000000
257	A0A3B3IS66	Coagulation factor XIII B chain (Fragment)	F13B	A0A3B3IS66;P05160	tr|A0A3B3IS66|A0A3B3IS66_HUMAN Coagulation factor XIII B chain (Fragment) OS=Homo sapiens OX=9606 GN=F13B PE=4 SV=1;sp|P05160|F13B_HUMAN Coagulation factor XIII B chain OS=Homo sapiens OX=9606 GN=F13B PE=1 SV=3	2	1	1	0	0	0	1	0	0	0	0	0	0	0	0	1	0	0	0	0	0	8.5	8.5	28.361	246	0	33.236	0	0	0	8.5	0	0	0	0	0	0	0	0	7351400	0	0	0	0
259	A0A3B3ISX9	Tenascin-X	TNXB	A0A3B3ISX9;A0A087WWA5;A0A140T9C0;A0A140T902;A0A140T8Y3;A0A140TA52;A0A140TA41;A0A140TA33;P22105	tr|A0A3B3ISX9|A0A3B3ISX9_HUMAN Tenascin-X OS=Homo sapiens OX=9606 GN=TNXB PE=4 SV=1;tr|A0A087WWA5|A0A087WWA5_HUMAN Tenascin-X OS=Homo sapiens OX=9606 GN=TNXB PE=1 SV=1;tr|A0A140T9C0|A0A140T9C0_HUMAN Tenascin-X OS=Homo sapiens OX=9606 GN=TNXB PE=1 SV=1;tr|A	16	4	4	2	2	2	4	3	2	4	2	3	2	2	2	4	3	2	4	2	3	1.8	1.8	485.42	4491	0	323.31	0.7	0.7	0.7	1.8	0.9	0.7	1.8	0.7	1.6	17562000	69647000	36740000	361610000	373460000	128310000	453230000	211930000
244	A0A3B3IUC0	Integral membrane protein 2B	ITM2B	A0A3B3IUC0;Q9NX12;Q7Z528;A0A384MDP7;Q9Y287	tr|A0A3B3IUC0|A0A3B3IUC0_HUMAN Integral membrane protein 2B OS=Homo sapiens OX=9606 GN=ITM2B PE=4 SV=1;tr|Q9NX12|Q9NX12_HUMAN cDNA FLJ20496 fis, clone KAT08729 OS=Homo sapiens OX=9606 PE=2 SV=1;tr|Q7Z528|Q7Z528_HUMAN E3-16 OS=Homo sapiens OX=9606 PE=2 SV=1	5	1	1	1	1	1	1	0	0	0	0	0	1	1	1	1	0	0	0	0	0	7.1	7.1	24.2	210	0	10.568	7.1	7.1	7.1	7.1	0	0	0	0	0	0	57589000	46742000	6820500	0	0	0	0
47	A0AV88	ADAM10 protein	ADAM10	A0AV88;A0A024R5U5;O14672	tr|A0AV88|A0AV88_HUMAN ADAM10 protein OS=Homo sapiens OX=9606 GN=ADAM10 PE=2 SV=1;tr|A0A024R5U5|A0A024R5U5_HUMAN ADAM metallopeptidase domain 10, isoform CRA_b OS=Homo sapiens OX=9606 GN=ADAM10 PE=4 SV=1;sp|O14672|ADA10_HUMAN Disintegrin and metalloprotein	3	1	1	0	0	0	1	0	0	0	0	0	0	0	0	1	0	0	0	0	0	2.9	2.9	57.896	512	0	3.0088	0	0	0	2.9	0	0	0	0	0	0	0	0	17974000	0	0	0	0
199	A0JLQ0	AZGP1 protein (Fragment)	AZGP1	A0JLQ0;C9JEV0;A0A140VK00;P25311	tr|A0JLQ0|A0JLQ0_HUMAN AZGP1 protein (Fragment) OS=Homo sapiens OX=9606 GN=AZGP1 PE=2 SV=1;tr|C9JEV0|C9JEV0_HUMAN Zinc-alpha-2-glycoprotein OS=Homo sapiens OX=9606 GN=AZGP1 PE=1 SV=1;tr|A0A140VK00|A0A140VK00_HUMAN Testicular tissue protein Li 227 OS=Homo s	4	2	2	0	0	0	1	0	0	0	2	2	0	0	0	1	0	0	0	2	2	17	17	18.707	159	0	20.557	0	0	0	5.7	0	0	0	17	17	0	0	0	0	0	0	0	7158600
264	A0PJ49	FGFRL1 protein (Fragment)	FGFRL1	A0PJ49;Q6ZMD4;Q8N441	tr|A0PJ49|A0PJ49_HUMAN FGFRL1 protein (Fragment) OS=Homo sapiens OX=9606 GN=FGFRL1 PE=2 SV=1;tr|Q6ZMD4|Q6ZMD4_HUMAN cDNA FLJ23990 fis, clone HRC08053, highly similar to Homo sapiens fibroblast growth factor receptor-like 1 (FGFRL1) OS=Homo sapiens OX=9606	3	2	2	1	2	2	2	1	0	1	1	1	1	2	2	2	1	0	1	1	1	6.3	6.3	33.929	315	0	153.99	2.9	6.3	6.3	6.3	2.9	0	3.5	3.5	3.5	11312000	13347000	16238000	4153100	9727600	0	7504600	9613600
1	A0T4C3	Truncated MHC class II antigen (Fragment)	HLA-DRB1	A0T4C3;R4L8Z3;Q9TQ46;Q9TQ45;Q9TQ44;Q9TQ43;Q9MYD7;Q9MYA1;S4T6M6;U3UA21;Q95IF0;Q95HL4;Q8WLU0;Q8SNC3;Q8SNB5;Q8MH61;Q860V5;Q860S8;Q860E1;V5JAA0;V5NR41;V6BNZ6;V9N2U6;W0HE91;W0NT93;R9WRN8;W0NTG8;S4T6U9;S4T6R2;S4T6R1;Q9GJ28;Q7YPZ5;Q7YQ30;Q9TQ47;U5IT82;M9PAJ3;S0F2C4;I6MHJ8;I6M558;I3TBB6;H9C8Y0;H8WV64;H8WV63;H8WV62;G9HWD1;H8WV60;H8WV59;H8WV58;H8WV57;H8WUJ3;H6VQN9;H2E2A7;H2DML5;H2BDT9;S4T6M5;M4YNP5;M9PA05;…	tr|A0T4C3|A0T4C3_HUMAN Truncated MHC class II antigen (Fragment) OS=Homo sapiens OX=9606 GN=HLA-DRB1 PE=4 SV=1;tr|R4L8Z3|R4L8Z3_HUMAN MHC class II antigen (Fragment) OS=Homo sapiens OX=9606 GN=HLA-DRB1 PE=4 SV=1;tr|Q9TQ46|Q9TQ46_HUMAN MHC class II antigen	557	1	1	0	0	0	1	0	1	0	0	0	0	0	0	1	0	1	0	0	0	19	19	6.2851	58	0	24.376	0	0	0	19	0	19	0	0	0	0	0	0	94418000	0	68472000	0	0
267	A2A2S5	Ribosome-binding protein 1 (Fragment)	RRBP1	A2A2S5;Q32NB1;A7BI36;Q9P2E9	tr|A2A2S5|A2A2S5_HUMAN Ribosome-binding protein 1 (Fragment) OS=Homo sapiens OX=9606 GN=RRBP1 PE=1 SV=1;tr|Q32NB1|Q32NB1_HUMAN RRBP1 protein (Fragment) OS=Homo sapiens OX=9606 GN=RRBP1 PE=2 SV=1;tr|A7BI36|A7BI36_HUMAN p180/ribosome receptor OS=Homo sapiens	4	1	1	0	0	0	0	0	0	0	1	0	0	0	0	0	0	0	0	1	0	5	5	31.721	300	0.0050761	0.87844	0	0	0	0	0	0	0	5	0	0	0	0	0	0	0	0	0
272	A3KC71	Nuclear envelope protein okuribin	okuribin	A3KC71;Q76M96;C9J8I6;H7C5K4;B4E342;A8KA16	tr|A3KC71|A3KC71_HUMAN Nuclear envelope protein okuribin OS=Homo sapiens OX=9606 GN=okuribin PE=2 SV=1;sp|Q76M96|CCD80_HUMAN Coiled-coil domain-containing protein 80 OS=Homo sapiens OX=9606 GN=CCDC80 PE=1 SV=1;tr|C9J8I6|C9J8I6_HUMAN Coiled-coil domain-cont	6	2	2	0	0	1	1	1	1	1	2	2	0	0	1	1	1	1	1	2	2	4.3	4.3	108.08	950	0	239.18	0	0	1.7	1.7	1.7	1.7	1.7	4.3	4.3	0	0	128070000	79711000	60988000	84954000	0	44410000
274	A3KMG0	MATN1 protein (Fragment)	MATN1	A3KMG0;B3KQU9;P21941	tr|A3KMG0|A3KMG0_HUMAN MATN1 protein (Fragment) OS=Homo sapiens OX=9606 GN=MATN1 PE=2 SV=1;tr|B3KQU9|B3KQU9_HUMAN cDNA PSEC0217 fis, clone HEMBA1004833, highly similar to CARTILAGE MATRIX PROTEIN OS=Homo sapiens OX=9606 PE=2 SV=1;sp|P21941|MATN1_HUMAN Cart	3	1	1	1	1	1	0	0	0	0	0	0	1	1	1	0	0	0	0	0	0	3.8	3.8	51.972	480	0	79.478	3.8	3.8	3.8	0	0	0	0	0	0	13696000	17726000	36218000	0	0	0	0	0
277	A4D213	DKFZP586J0619 protein	DKFZP586J0619 tcag7.531	A4D213;A4D212;Q8N201	tr|A4D213|A4D213_HUMAN DKFZP586J0619 protein OS=Homo sapiens OX=9606 GN=DKFZP586J0619 PE=4 SV=1;tr|A4D212|A4D212_HUMAN DKFZP586J0619 protein OS=Homo sapiens OX=9606 GN=DKFZP586J0619 PE=4 SV=1;sp|Q8N201|INT1_HUMAN Integrator complex subunit 1 OS=Homo sapien	3	1	1	0	0	0	0	0	0	0	1	0	0	0	0	0	0	0	0	1	0	0.7	0.7	266.64	2408	0.0050505	0.8454	0	0	0	0	0	0	0	0.7	0	0	0	0	0	0	0	0	33955000
279	A4QPA1	PTGFRN protein (Fragment)	PTGFRN	A4QPA1;Q1WWL2;Q4QQP8;Q9P2B2	tr|A4QPA1|A4QPA1_HUMAN PTGFRN protein (Fragment) OS=Homo sapiens OX=9606 GN=PTGFRN PE=2 SV=1;tr|Q1WWL2|Q1WWL2_HUMAN PTGFRN protein (Fragment) OS=Homo sapiens OX=9606 GN=PTGFRN PE=2 SV=1;tr|Q4QQP8|Q4QQP8_HUMAN PTGFRN protein (Fragment) OS=Homo sapiens OX=96	5	3	3	1	1	0	1	0	0	2	1	2	1	1	0	1	0	0	2	1	2	4.4	4.4	73.746	653	0	30.905	1.4	1.4	0	1.4	0	0	2.6	1.4	3.2	0	0	0	17811000	0	0	18559000	22418000
280	A5D8U1	Matrilin 4	MATN4	A5D8U1	tr|A5D8U1|A5D8U1_HUMAN Matrilin 4 OS=Homo sapiens OX=9606 GN=MATN4 PE=2 SV=1	1	2	1	0	0	1	1	1	2	1	2	1	0	0	0	0	1	1	1	1	0	6.7	4.8	59.518	540	0	89.995	0	0	1.9	1.9	4.8	6.7	4.8	6.7	1.9	0	0	429070000	70947000	144500000	235650000	58680000	848940000
286	A6NCT7	Collagen alpha-1(XVI) chain	COL16A1	A6NCT7;Q07092	tr|A6NCT7|A6NCT7_HUMAN Collagen alpha-1(XVI) chain OS=Homo sapiens OX=9606 GN=COL16A1 PE=1 SV=1;sp|Q07092|COGA1_HUMAN Collagen alpha-1(XVI) chain OS=Homo sapiens OX=9606 GN=COL16A1 PE=1 SV=2	2	2	2	1	1	1	2	1	1	1	1	1	1	1	1	2	1	1	1	1	1	3.2	3.2	96.792	966	0	90.014	2	2	2	3.2	2	2	2	2	2	37032000	27250000	28859000	13105000	59366000	57402000	18641000	19169000
169	A6NL68	Solute carrier family 2, facilitated glucose transporter member 1 (Fragment)	SLC2A1	A6NL68;A0A0D9SG74;A0A0D9SFK9;B4DKW1;B4DDR6;Q0P512;Q59GX2;P11166	tr|A6NL68|A6NL68_HUMAN Solute carrier family 2, facilitated glucose transporter member 1 (Fragment) OS=Homo sapiens OX=9606 GN=SLC2A1 PE=1 SV=2;tr|A0A0D9SG74|A0A0D9SG74_HUMAN Solute carrier family 2, facilitated glucose transporter member 1 (Fragment) OS=H	8	1	1	1	1	1	0	0	0	1	1	1	1	1	1	0	0	0	1	1	1	11.2	11.2	12.868	116	0	38.42	11.2	11.2	11.2	0	0	0	11.2	11.2	11.2	143730000	132910000	194950000	0	0	0	297590000	238190000
166	A6NLC6	V-type proton ATPase subunit S1 (Fragment)	ATP6AP1	A6NLC6;A0A0C4DGX8;Q8NF19;B3KR70;A0A384MQW4;Q15904	tr|A6NLC6|A6NLC6_HUMAN V-type proton ATPase subunit S1 (Fragment) OS=Homo sapiens OX=9606 GN=ATP6AP1 PE=1 SV=3;tr|A0A0C4DGX8|A0A0C4DGX8_HUMAN ATPase, H+ transporting, lysosomal accessory protein 1, isoform CRA_c OS=Homo sapiens OX=9606 GN=ATP6AP1 PE=1 SV=1	6	1	1	0	0	0	1	1	1	1	1	1	0	0	0	1	1	1	1	1	1	7	7	30.122	273	0	3.5156	0	0	0	7	7	7	7	7	7	0	0	0	5201000	16355000	9172200	9535700	14083000
288	A6NLG9	Biglycan		A6NLG9;B4DDQ2;Q53FI4;A8K7E0;P21810;B3KS75;Q53HU6;Q8NAB7;B4DNL4;B4DQD6;B4DDN7	tr|A6NLG9|A6NLG9_HUMAN Biglycan OS=Homo sapiens OX=9606 PE=2 SV=1;tr|B4DDQ2|B4DDQ2_HUMAN Biglycan OS=Homo sapiens OX=9606 PE=2 SV=1;tr|Q53FI4|Q53FI4_HUMAN Biglycan (Fragment) OS=Homo sapiens OX=9606 PE=2 SV=1;tr|A8K7E0|A8K7E0_HUMAN Biglycan OS=Homo sapiens	11	15	9	10	10	10	8	5	4	10	12	10	6	7	6	4	4	3	7	8	6	61.2	40.4	34.875	307	0	323.31	42	49.5	41	35.8	22.5	19.5	45.3	55.7	45	139130000000	107720000000	163100000000	41915000000	180770000000	80281000000	65771000000	48600000000
289	A6NMZ7	Collagen alpha-6(VI) chain	COL6A6	A6NMZ7	sp|A6NMZ7|CO6A6_HUMAN Collagen alpha-6(VI) chain OS=Homo sapiens OX=9606 GN=COL6A6 PE=1 SV=2	1	1	1	0	0	0	0	0	0	0	1	0	0	0	0	0	0	0	0	1	0	0.4	0.4	247.17	2263	0.0050934	0.88135	0	0	0	0	0	0	0	0.4	0	0	0	0	0	0	0	0	1904800
290	A6XAA7	Gremlin	GREM1 hCG_1811964	A6XAA7;O60565	tr|A6XAA7|A6XAA7_HUMAN Gremlin OS=Homo sapiens OX=9606 GN=GREM1 PE=2 SV=1;sp|O60565|GREM1_HUMAN Gremlin-1 OS=Homo sapiens OX=9606 GN=GREM1 PE=1 SV=1	2	1	1	0	1	1	1	0	0	1	1	1	0	1	1	1	0	0	1	1	1	9.8	9.8	20.697	184	0	323.31	0	9.8	9.8	9.8	0	0	9.8	9.8	9.8	0	215600000	280570000	23928000	0	0	138780000	91523000
293	A8K0R3	Osteoglycin (Osteoinductive factor, mimecan), isoform CRA_a (cDNA FLJ78199, highly similar to Homo sapiens osteoglycin (osteoinductive factor, mimecan) (OGN), transcript variant 3, mRNA) (cDNA PSEC0219 fis, clone HEMBA1005229, highly similar to Mimecan)	OGN hCG_31130	A8K0R3;B4DI63;P20774;Q7Z532	tr|A8K0R3|A8K0R3_HUMAN Osteoglycin (Osteoinductive factor, mimecan), isoform CRA_a OS=Homo sapiens OX=9606 GN=OGN PE=2 SV=1;tr|B4DI63|B4DI63_HUMAN cDNA FLJ59205, highly similar to Mimecan OS=Homo sapiens OX=9606 PE=2 SV=1;sp|P20774|MIME_HUMAN Mimecan OS=Ho	5	8	8	2	2	2	4	4	5	7	8	8	2	2	2	4	4	5	7	8	8	29.5	29.5	33.922	298	0	323.31	11.4	11.4	11.4	15.1	20.1	20.1	23.5	29.5	29.5	6929800000	13869000000	13010000000	21849000000	48947000000	33752000000	21616000000	18448000000
295	A8K2T4	Complement component C7	C7	A8K2T4;B2R6W1;P10643	tr|A8K2T4|A8K2T4_HUMAN cDNA FLJ78207, highly similar to Human complement protein component C7 mRNA OS=Homo sapiens OX=9606 PE=2 SV=1;tr|B2R6W1|B2R6W1_HUMAN cDNA, FLJ93143, highly similar to Homo sapiens complement component 7 (C7), mRNA OS=Homo sapiens OX=	3	1	1	0	0	0	0	0	0	0	1	0	0	0	0	0	0	0	0	1	0	0.8	0.8	93.406	843	1	-2	0	0	0	0	0	0	0	0.8	0	0	0	0	0	0	0	0	0
292	A8K369	cDNA FLJ76707, highly similar to Homo sapiens transmembrane protein 87A, mRNA		A8K369;B4DN92;A8K285;A8K0M6;Q8NBN3	tr|A8K369|A8K369_HUMAN cDNA FLJ76707, highly similar to Homo sapiens transmembrane protein 87A, mRNA OS=Homo sapiens OX=9606 PE=2 SV=1;tr|B4DN92|B4DN92_HUMAN cDNA FLJ58594 OS=Homo sapiens OX=9606 PE=2 SV=1;tr|A8K285|A8K285_HUMAN cDNA FLJ78239 OS=Homo sapie	5	1	1	0	0	0	1	1	1	1	1	1	0	0	0	1	1	1	1	1	1	2	2	56.715	494	0	2.1579	0	0	0	2	2	2	2	2	2	0	0	0	24614000	0	12185000	11282000	19829000
306	A8K8F6	cDNA FLJ78417, highly similar to Homo sapiens low density lipoprotein receptor-related protein associated protein 1 (LRPAP1), mRNA		A8K8F6;B2R6S9;P30533	tr|A8K8F6|A8K8F6_HUMAN cDNA FLJ78417, highly similar to Homo sapiens low density lipoprotein receptor-related protein associated protein 1 (LRPAP1), mRNA OS=Homo sapiens OX=9606 PE=2 SV=1;tr|B2R6S9|B2R6S9_HUMAN cDNA, FLJ93097, highly similar to Homo sapien	3	1	1	1	0	0	1	0	0	1	1	1	1	0	0	1	0	0	1	1	1	4.5	4.5	41.412	357	0	83.729	4.5	0	0	4.5	0	0	4.5	4.5	4.5	24194000	0	0	45298000	0	0	50639000	58771000
307	A8K8T0	cDNA FLJ78760, highly similar to Homo sapiens integrin, alpha 11 (ITGA11), transcript variant 1, mRNA		A8K8T0;Q9UKX5;B4E3M0	tr|A8K8T0|A8K8T0_HUMAN cDNA FLJ78760, highly similar to Homo sapiens integrin, alpha 11 (ITGA11), transcript variant 1, mRNA OS=Homo sapiens OX=9606 PE=2 SV=1;sp|Q9UKX5|ITA11_HUMAN Integrin alpha-11 OS=Homo sapiens OX=9606 GN=ITGA11 PE=1 SV=2;tr|B4E3M0|B4E	4	6	6	0	0	0	5	0	0	1	4	0	0	0	0	5	0	0	1	4	0	7.3	7.3	133.41	1188	0	136.26	0	0	0	6.6	0	0	0.7	4.7	0	0	0	0	19077000	0	0	3355500	0
313	A8KAM8	Platelet-derived growth factor receptor beta (PDGF-R-beta) (PDGFR-beta) (EC 2.7.10.1) (Beta platelet-derived growth factor receptor) (Beta-type platelet-derived growth factor receptor)		A8KAM8;P09619	tr|A8KAM8|A8KAM8_HUMAN Platelet-derived growth factor receptor beta OS=Homo sapiens OX=9606 PE=2 SV=1;sp|P09619|PGFRB_HUMAN Platelet-derived growth factor receptor beta OS=Homo sapiens OX=9606 GN=PDGFRB PE=1 SV=1	2	1	1	0	0	0	1	1	1	0	0	0	0	0	0	1	1	1	0	0	0	1.2	1.2	123.92	1106	0	4.5447	0	0	0	1.2	1.2	1.2	0	0	0	0	0	0	11829000	0	0	0	0
163	A8MSM7	Microtubule-associated protein 9	MAP9	A8MSM7;Q6PH77;A0A0C4DG83;Q05CN5;A2VCS9;A2VCT0;B4DVG9;E7ETZ8;B9EJB6;Q49MG5	tr|A8MSM7|A8MSM7_HUMAN Microtubule-associated protein 9 OS=Homo sapiens OX=9606 GN=MAP9 PE=1 SV=1;tr|Q6PH77|Q6PH77_HUMAN MAP9 protein (Fragment) OS=Homo sapiens OX=9606 GN=MAP9 PE=2 SV=1;tr|A0A0C4DG83|A0A0C4DG83_HUMAN Aster-associated protein, isoform CRA_	10	1	1	0	0	1	0	0	0	0	0	0	0	0	1	0	0	0	0	0	0	7.9	7.9	21.763	190	0	1.6	0	0	7.9	0	0	0	0	0	0	0	0	36068000	0	0	0	0	0
22	B0QY60	SUN domain-containing protein 2 (Fragment)	SUN2	B0QY60;Q6NT72;B4DIU6;A8K129;A0A024R1P7;B4E2A6;Q9UH99	tr|B0QY60|B0QY60_HUMAN SUN domain-containing protein 2 (Fragment) OS=Homo sapiens OX=9606 GN=SUN2 PE=1 SV=1;tr|Q6NT72|Q6NT72_HUMAN UNC84B protein (Fragment) OS=Homo sapiens OX=9606 GN=UNC84B PE=2 SV=1;tr|B4DIU6|B4DIU6_HUMAN cDNA FLJ59542, highly similar to	7	1	1	0	1	0	1	0	0	0	0	0	0	1	0	1	0	0	0	0	0	6.6	6.6	21.772	198	0	1.8494	0	6.6	0	6.6	0	0	0	0	0	0	10845000	0	21688000	0	0	0	0
318	B1ALB4	Protein SMG7 (Fragment)	SMG7	B1ALB4;Q8NB69;Q96N31;Q6TV06;B4DLY0;E9PD50;Q92540	tr|B1ALB4|B1ALB4_HUMAN Protein SMG7 (Fragment) OS=Homo sapiens OX=9606 GN=SMG7 PE=1 SV=8;tr|Q8NB69|Q8NB69_HUMAN cDNA FLJ34158 fis, clone FCBBF3013589, weakly similar to GLUTENIN, LOW MOLECULAR WEIGHT SUBUNIT (Fragment) OS=Homo sapiens OX=9606 PE=2 SV=1;tr|	7	1	1	1	0	0	0	0	0	0	0	0	1	0	0	0	0	0	0	0	0	1.9	1.9	84.829	756	0.0049505	0.77674	1.9	0	0	0	0	0	0	0	0	0	0	0	0	0	0	0	0
27	B1APY4	Receptor tyrosine kinase-like orphan receptor 2, isoform CRA_b (Tyrosine-protein kinase transmembrane receptor ROR2)	ROR2 hCG_1985325	B1APY4;A0A024R2A0;A1L4F5;Q01974	tr|B1APY4|B1APY4_HUMAN Receptor tyrosine kinase-like orphan receptor 2, isoform CRA_b OS=Homo sapiens OX=9606 GN=ROR2 PE=1 SV=1;tr|A0A024R2A0|A0A024R2A0_HUMAN Receptor tyrosine kinase-like orphan receptor 2, isoform CRA_a OS=Homo sapiens OX=9606 GN=ROR2 PE	4	1	1	0	0	0	1	0	0	0	0	0	0	0	0	1	0	0	0	0	0	1.8	1.8	79.27	704	1	-2	0	0	0	1.8	0	0	0	0	0	0	0	0	2769700	0	0	0	0
95	B2R627	cDNA, FLJ92752, highly similar to Homo sapiens integrin, alpha 5 (fibronectin receptor, alphapolypeptide) (ITGA5), mRNA		B2R627;A8K6A5;A0A024RB01;P08648	tr|B2R627|B2R627_HUMAN cDNA, FLJ92752, highly similar to Homo sapiens integrin, alpha 5 (fibronectin receptor, alphapolypeptide) (ITGA5), mRNA OS=Homo sapiens OX=9606 PE=2 SV=1;tr|A8K6A5|A8K6A5_HUMAN cDNA FLJ77742, highly similar to Homo sapiens integrin,	4	7	7	4	4	3	6	3	5	5	6	4	4	4	3	6	3	5	5	6	4	10.4	10.4	114.48	1049	0	323.31	6.1	6.1	4.9	10.4	4.5	8.3	8.2	8.2	6.1	86830000	73932000	69227000	154920000	191450000	161210000	174050000	259330000
324	B2R7N9	cDNA, FLJ93532, highly similar to Homo sapiens osteomodulin (OMD), mRNA		B2R7N9;Q99983	tr|B2R7N9|B2R7N9_HUMAN cDNA, FLJ93532, highly similar to Homo sapiens osteomodulin (OMD), mRNA OS=Homo sapiens OX=9606 PE=2 SV=1;sp|Q99983|OMD_HUMAN Osteomodulin OS=Homo sapiens OX=9606 GN=OMD PE=1 SV=1	2	3	3	1	1	1	1	1	2	0	1	1	1	1	1	1	1	2	0	1	1	17.3	17.3	49.422	421	0	60.069	5.2	5.2	5.2	6.7	5.2	11.9	0	5.5	5.2	52416000	84198000	57812000	60479000	244460000	201190000	0	0
315	B2R8K9	Aminopeptidase (EC 3.4.11.-)		B2R8K9;B0BCZ7;B0BCZ6;B0BCZ5;B0BCZ4;B0BCZ2;B0BCZ1;B0BCZ0;B0BCY9;B0BCY8;B0BCY7;Q07075;B0BCZ3	tr|B2R8K9|B2R8K9_HUMAN Aminopeptidase OS=Homo sapiens OX=9606 PE=2 SV=1;tr|B0BCZ7|B0BCZ7_HUMAN Aminopeptidase OS=Homo sapiens OX=9606 GN=ENPEP PE=2 SV=1;tr|B0BCZ6|B0BCZ6_HUMAN Aminopeptidase OS=Homo sapiens OX=9606 GN=ENPEP PE=2 SV=1;tr|B0BCZ5|B0BCZ5_HUMAN	13	3	3	0	0	0	3	1	1	1	0	1	0	0	0	3	1	1	1	0	1	4.1	4.1	109.27	957	0	34.417	0	0	0	4.1	1.1	1.1	1.1	0	1.1	0	0	0	21196000	31829000	28233000	0	0
327	B2R9K6	cDNA, FLJ94436, highly similar to Homo sapiens platelet derived growth factor C (PDGFC), mRNA		B2R9K6;Q9NRA1	tr|B2R9K6|B2R9K6_HUMAN cDNA, FLJ94436, highly similar to Homo sapiens platelet derived growth factor C (PDGFC), mRNA OS=Homo sapiens OX=9606 PE=2 SV=1;sp|Q9NRA1|PDGFC_HUMAN Platelet-derived growth factor C OS=Homo sapiens OX=9606 GN=PDGFC PE=1 SV=2	2	1	1	0	0	0	0	0	0	1	0	1	0	0	0	0	0	0	1	0	1	4.1	4.1	39.039	345	0	3.7318	0	0	0	0	0	0	4.1	0	4.1	0	0	0	0	0	0	25658000	0
328	B2RA94	cDNA, FLJ94779		B2RA94;Q7Z5L7	tr|B2RA94|B2RA94_HUMAN cDNA, FLJ94779 OS=Homo sapiens OX=9606 PE=2 SV=1;sp|Q7Z5L7|PODN_HUMAN Podocan OS=Homo sapiens OX=9606 GN=PODN PE=1 SV=2	2	1	1	1	0	0	1	0	1	1	1	1	1	0	0	1	0	1	1	1	1	4	4	45.733	402	0	226.48	4	0	0	4	0	4	4	4	4	9376800	0	0	23416000	0	0	28677000	24138000
330	B2RAK1	cDNA, FLJ94965, highly similar to Homo sapiens leucyl/cystinyl aminopeptidase (LNPEP), mRNA		B2RAK1;Q9UIQ6	tr|B2RAK1|B2RAK1_HUMAN cDNA, FLJ94965, highly similar to Homo sapiens leucyl/cystinyl aminopeptidase (LNPEP), mRNA OS=Homo sapiens OX=9606 PE=2 SV=1;sp|Q9UIQ6|LCAP_HUMAN Leucyl-cystinyl aminopeptidase OS=Homo sapiens OX=9606 GN=LNPEP PE=1 SV=3	2	3	3	0	0	0	2	0	0	2	3	1	0	0	0	2	0	0	2	3	1	4.4	4.4	117.34	1025	0	74.359	0	0	0	2.9	0	0	3	4.4	1.6	0	0	0	17114000	0	0	11400000	19113000
50	B2RBZ5	cDNA, FLJ95778, highly similar to Homo sapiens serpin peptidase inhibitor, clade A (alpha-1 antiproteinase, antitrypsin), member 10 (SERPINA10), mRNA		B2RBZ5;A0A024R6I6;G3V2W1;Q9UK55	tr|B2RBZ5|B2RBZ5_HUMAN cDNA, FLJ95778, highly similar to Homo sapiens serpin peptidase inhibitor, clade A (alpha-1 antiproteinase, antitrypsin), member 10 (SERPINA10), mRNA OS=Homo sapiens OX=9606 PE=2 SV=1;tr|A0A024R6I6|A0A024R6I6_HUMAN Serpin peptidase i	4	1	1	0	0	0	1	0	0	1	1	1	0	0	0	1	0	0	1	1	1	1.8	1.8	50.674	444	0.005102	0.88135	0	0	0	1.8	0	0	1.8	1.8	1.8	0	0	0	4830700	0	0	5103300	6692700
333	B2RC09	cDNA, FLJ95794, highly similar to Homo sapiens apolipoprotein F (APOF), mRNA		B2RC09;Q13790	tr|B2RC09|B2RC09_HUMAN cDNA, FLJ95794, highly similar to Homo sapiens apolipoprotein F (APOF), mRNA OS=Homo sapiens OX=9606 PE=2 SV=1;sp|Q13790|APOF_HUMAN Apolipoprotein F OS=Homo sapiens OX=9606 GN=APOF PE=1 SV=2	2	1	1	0	0	0	1	1	1	1	0	1	0	0	0	1	1	1	1	0	1	4.6	4.6	35.373	326	0	1.9504	0	0	0	4.6	4.6	4.6	4.6	0	4.6	0	0	0	1931200	0	8452000	5220700	0
334	B2RC89	cDNA, FLJ95913, highly similar to Homo sapiens keratocan (KERA), mRNA		B2RC89;O60938	tr|B2RC89|B2RC89_HUMAN cDNA, FLJ95913, highly similar to Homo sapiens keratocan (KERA), mRNA OS=Homo sapiens OX=9606 PE=2 SV=1;sp|O60938|KERA_HUMAN Keratocan OS=Homo sapiens OX=9606 GN=KERA PE=1 SV=1	2	1	1	0	0	0	0	0	0	0	0	1	0	0	0	0	0	0	0	0	1	5.1	5.1	40.421	352	0	1.6784	0	0	0	0	0	0	0	0	5.1	0	0	0	0	0	0	0	0
337	B2RXL4	Aquaporin	AQP12B	B2RXL4;C9J6F6;Q8IXF9	tr|B2RXL4|B2RXL4_HUMAN Aquaporin OS=Homo sapiens OX=9606 GN=AQP12B PE=2 SV=1;tr|C9J6F6|C9J6F6_HUMAN Aquaporin OS=Homo sapiens OX=9606 GN=AQP12A PE=3 SV=1;sp|Q8IXF9|AQ12A_HUMAN Aquaporin-12A OS=Homo sapiens OX=9606 GN=AQP12A PE=2 SV=1	3	1	1	0	0	0	0	0	0	0	1	0	0	0	0	0	0	0	0	1	0	7.2	7.2	32.66	307	1	-2	0	0	0	0	0	0	0	7.2	0	0	0	0	0	0	0	0	0
343	B3KNV8	Polypeptide N-acetylgalactosaminyltransferase (EC 2.4.1.-) (Protein-UDP acetylgalactosaminyltransferase)		B3KNV8;Q58A54;Q6P9A2	tr|B3KNV8|B3KNV8_HUMAN Polypeptide N-acetylgalactosaminyltransferase OS=Homo sapiens OX=9606 PE=2 SV=1;tr|Q58A54|Q58A54_HUMAN Polypeptide N-acetylgalactosaminyltransferase OS=Homo sapiens OX=9606 GN=GalNAc-T18 PE=2 SV=1;sp|Q6P9A2|GLT18_HUMAN Polypeptide N-	3	1	1	1	1	0	0	0	0	1	1	1	1	1	0	0	0	0	1	1	1	1.5	1.5	69.588	607	0.0049834	0.80182	1.5	1.5	0	0	0	0	1.5	1.5	1.5	2238100	3294500	0	0	0	0	8689800	3139100
269	B3KQB2	cDNA FLJ90112 fis, clone HEMBA1006707, highly similar to Matrilin-4		B3KQB2;A2RRP8;O95460;A6NNA4	tr|B3KQB2|B3KQB2_HUMAN cDNA FLJ90112 fis, clone HEMBA1006707, highly similar to Matrilin-4 OS=Homo sapiens OX=9606 PE=2 SV=1;tr|A2RRP8|A2RRP8_HUMAN Matrilin 4 OS=Homo sapiens OX=9606 GN=MATN4 PE=2 SV=1;sp|O95460|MATN4_HUMAN Matrilin-4 OS=Homo sapiens OX=96	4	2	1	0	0	1	2	1	2	1	2	2	0	0	0	1	1	1	1	1	1	5.9	4.1	64.136	581	0	39.765	0	0	1.7	5.9	4.1	5.9	4.1	5.9	5.9	0	0	0	49945000	89501000	79898000	66624000	377080000
345	B3KQE1	cDNA FLJ90315 fis, clone NT2RP2001480, highly similar to Thrombospondin-3		B3KQE1;F5H4Z8;Q53FK6;Q2HIZ0;P49746;B4DQQ9;B4DQH6;Q2HIZ1	tr|B3KQE1|B3KQE1_HUMAN cDNA FLJ90315 fis, clone NT2RP2001480, highly similar to Thrombospondin-3 OS=Homo sapiens OX=9606 PE=2 SV=1;tr|F5H4Z8|F5H4Z8_HUMAN Thrombospondin-3 OS=Homo sapiens OX=9606 GN=THBS3 PE=1 SV=2;tr|Q53FK6|Q53FK6_HUMAN Thrombospondin 3 va	8	2	2	0	2	2	2	1	1	2	2	2	0	2	2	2	1	1	2	2	2	3.7	3.7	83.002	762	0	287.83	0	3.7	3.7	3.7	2	2	3.7	3.7	3.7	0	22508000	26902000	235040000	109800000	165950000	440420000	620780000
348	B3KQQ3	cDNA PSEC0016 fis, clone NT2RM1001076, highly similar to Procollagen-lysine,2-oxoglutarate 5-dioxygenase 3		B3KQQ3;O60568;C9JIX5;C9JU11;H7C2S8;B4DMP0;Q9UG85	tr|B3KQQ3|B3KQQ3_HUMAN cDNA PSEC0016 fis, clone NT2RM1001076, highly similar to Procollagen-lysine,2-oxoglutarate 5-dioxygenase 3 OS=Homo sapiens OX=9606 PE=2 SV=1;sp|O60568|PLOD3_HUMAN Multifunctional procollagen lysine hydroxylase and glycosyltransferase	7	2	2	0	1	1	1	0	0	2	2	1	0	1	1	1	0	0	2	2	1	2.7	2.7	84.643	738	0	2.3259	0	1.4	1.4	1.4	0	0	2.7	2.7	1.4	0	8576100	10640000	20494000	0	0	9366000	24055000
266	B3KQX7	cDNA FLJ33256 fis, clone ASTRO2005557, highly similar to MAJOR PRION PROTEIN		B3KQX7;B4DI53;Q6SES1;Q6FGR8;Q6FGN5;Q5U0K3;Q53YK7;A1YVW6;A2A2V1;Q540C4;Q86XR1;B2NI05;B2NI04;B4DJ65;X6RKS3;B4DDS1;O75942;P04156	tr|B3KQX7|B3KQX7_HUMAN cDNA FLJ33256 fis, clone ASTRO2005557, highly similar to MAJOR PRION PROTEIN OS=Homo sapiens OX=9606 PE=2 SV=1;tr|B4DI53|B4DI53_HUMAN cDNA FLJ52543, highly similar to Major prion protein OS=Homo sapiens OX=9606 PE=2 SV=1;tr|Q6SES1|Q6	18	1	1	1	1	1	1	1	1	1	1	1	1	1	1	1	1	1	1	1	1	6.1	6.1	18.177	163	0	2.362	6.1	6.1	6.1	6.1	6.1	6.1	6.1	6.1	6.1	82621000	264260000	193980000	37545000	0	0	162710000	115490000
106	B3KRY3	cDNA FLJ35079 fis, clone PLACE6005283, highly similar to Lysosome-associated membrane glycoprotein 1		B3KRY3;A0A024RDY3;P11279;Q59FZ0	tr|B3KRY3|B3KRY3_HUMAN cDNA FLJ35079 fis, clone PLACE6005283, highly similar to Lysosome-associated membrane glycoprotein 1 OS=Homo sapiens OX=9606 PE=2 SV=1;tr|A0A024RDY3|A0A024RDY3_HUMAN Lysosomal-associated membrane protein 1, isoform CRA_a OS=Homo sapi	4	6	6	3	3	2	4	3	3	3	4	2	3	3	2	4	3	3	3	4	2	13.9	13.9	42.585	395	0	182.29	8.1	4.6	6.1	9.9	8.1	8.1	7.8	11.9	6.1	63269000	37260000	53575000	133060000	269120000	93364000	135260000	180030000
339	B3KS71	cDNA FLJ35671 fis, clone SPLEN2018180, highly similar to Cartilage-associated protein		B3KS71;C9JP16;Q8NB01;B3KME2;O75718;B4DPA3;B3KUP0;B3KQR7;B3KX16	tr|B3KS71|B3KS71_HUMAN cDNA FLJ35671 fis, clone SPLEN2018180, highly similar to Cartilage-associated protein OS=Homo sapiens OX=9606 PE=2 SV=1;tr|C9JP16|C9JP16_HUMAN Cartilage-associated protein OS=Homo sapiens OX=9606 GN=CRTAP PE=1 SV=1;tr|Q8NB01|Q8NB01_H	9	2	2	0	0	0	0	0	0	0	2	0	0	0	0	0	0	0	0	2	0	14	14	39.991	343	0	110.49	0	0	0	0	0	0	0	14	0	0	0	0	0	0	0	0	64647000
282	B3KTA8	cDNA FLJ37971 fis, clone CTONG2009958, highly similar to CERULOPLASMIN		B3KTA8;H7C5R1;E9PFZ2;B7Z5Q2;Q1L857;A8K5A4;A5PL27;P00450	tr|B3KTA8|B3KTA8_HUMAN cDNA FLJ37971 fis, clone CTONG2009958, highly similar to CERULOPLASMIN OS=Homo sapiens OX=9606 PE=2 SV=1;tr|H7C5R1|H7C5R1_HUMAN Ceruloplasmin (Fragment) OS=Homo sapiens OX=9606 GN=CP PE=1 SV=1;tr|E9PFZ2|E9PFZ2_HUMAN Ceruloplasmin OS=	8	2	2	2	2	2	2	1	2	2	1	2	2	2	2	2	1	2	2	1	2	4.8	4.8	89.045	778	0	315.91	4.8	4.8	4.8	4.8	2.6	4.8	4.8	2.2	4.8	144520000	333720000	160200000	478860000	38103000	291680000	142970000	96355000
98	B3KTQ2	cDNA FLJ38589 fis, clone HCHON2010074, highly similar to LACTADHERIN		B3KTQ2;A0A024RC55;Q08431;B4E396;X6R3G6;A0A024RC59;H0YKS8	tr|B3KTQ2|B3KTQ2_HUMAN cDNA FLJ38589 fis, clone HCHON2010074, highly similar to LACTADHERIN OS=Homo sapiens OX=9606 PE=2 SV=1;tr|A0A024RC55|A0A024RC55_HUMAN Milk fat globule-EGF factor 8 protein, isoform CRA_a OS=Homo sapiens OX=9606 GN=MFGE8 PE=4 SV=1;sp|	8	8	8	3	6	5	3	1	2	3	6	3	3	6	5	3	1	2	3	6	3	29	29	42.459	379	0	323.31	12.4	22.4	20.6	11.9	2.6	7.1	11.9	21.9	11.9	2080000000	1936300000	2133900000	1075700000	1022100000	311870000	965580000	1163500000
356	B3KUI0	cDNA FLJ39945 fis, clone SPLEN2023977, highly similar to Homo sapiens CD97 antigen (CD97), transcript variant 2, mRNA		B3KUI0;P48960;B4E336;B4DTS6	tr|B3KUI0|B3KUI0_HUMAN cDNA FLJ39945 fis, clone SPLEN2023977, highly similar to Homo sapiens CD97 antigen (CD97), transcript variant 2, mRNA OS=Homo sapiens OX=9606 PE=2 SV=1;sp|P48960|CD97_HUMAN CD97 antigen OS=Homo sapiens OX=9606 GN=CD97 PE=1 SV=4;tr|B4	4	2	2	0	0	0	1	1	1	1	1	0	0	0	0	1	1	1	1	1	0	4	4	78.028	707	0	79.367	0	0	0	2.1	2.1	2.1	1.8	2.1	0	0	0	0	4988400	12638000	11304000	0	0
357	B3KVV1	cDNA FLJ41563 fis, clone CTONG1000341, highly similar to THROMBOMODULIN		B3KVV1;P07204	tr|B3KVV1|B3KVV1_HUMAN cDNA FLJ41563 fis, clone CTONG1000341, highly similar to THROMBOMODULIN OS=Homo sapiens OX=9606 PE=2 SV=1;sp|P07204|TRBM_HUMAN Thrombomodulin OS=Homo sapiens OX=9606 GN=THBD PE=1 SV=2	2	1	1	0	1	1	1	0	0	0	0	0	0	1	1	1	0	0	0	0	0	2.7	2.7	58.672	557	0	17.63	0	2.7	2.7	2.7	0	0	0	0	0	0	0	20048000	0	0	0	0	0
358	B3KWI4	cDNA FLJ43122 fis, clone CTONG3003737, highly similar to Leucine-rich repeat-containing protein 15		B3KWI4;Q8TF66	tr|B3KWI4|B3KWI4_HUMAN cDNA FLJ43122 fis, clone CTONG3003737, highly similar to Leucine-rich repeat-containing protein 15 OS=Homo sapiens OX=9606 PE=2 SV=1;sp|Q8TF66|LRC15_HUMAN Leucine-rich repeat-containing protein 15 OS=Homo sapiens OX=9606 GN=LRRC15 PE	2	1	1	0	0	0	0	1	1	1	1	1	0	0	0	0	1	1	1	1	1	2.4	2.4	64.394	581	0	190.02	0	0	0	0	2.4	2.4	2.4	2.4	2.4	0	0	0	0	18871000	22210000	11056000	21009000
291	B3KWK7	Insulin-like growth factor binding protein 3, isoform CRA_b (Insulin-like growth factor-binding protein 3) (cDNA FLJ43234 fis, clone HCHON2002964, highly similar to Insulin-like growth factor-binding protein 3)	IGFBP3 hCG_1735376	B3KWK7;B3KTQ0;B4DP07;A6XNC9;A6XND1;B3KVF9;A6XND0;B4DN53;B3KRZ1;P17936	tr|B3KWK7|B3KWK7_HUMAN Insulin-like growth factor binding protein 3, isoform CRA_b OS=Homo sapiens OX=9606 GN=IGFBP3 PE=1 SV=1;tr|B3KTQ0|B3KTQ0_HUMAN cDNA FLJ38581 fis, clone HCHON2008672, highly similar to Insulin-like growth factor-binding protein 3 OS=H	10	2	2	0	0	0	1	0	0	0	1	0	0	0	0	1	0	0	0	1	0	16	16	21.844	194	0	14.375	0	0	0	5.7	0	0	0	10.3	0	0	0	0	0	0	0	0	3651400
359	B3KXM6	cDNA FLJ45735 fis, clone JCMLC2000273, highly similar to Integrin alpha-M		B3KXM6;P11215	tr|B3KXM6|B3KXM6_HUMAN cDNA FLJ45735 fis, clone JCMLC2000273, highly similar to Integrin alpha-M OS=Homo sapiens OX=9606 PE=2 SV=1;sp|P11215|ITAM_HUMAN Integrin alpha-M OS=Homo sapiens OX=9606 GN=ITGAM PE=1 SV=2	2	3	3	0	0	0	1	0	2	0	1	0	0	0	0	1	0	2	0	1	0	5.7	5.7	62.259	558	0	10.504	0	0	0	2	0	3.8	0	2.2	0	0	0	0	0	0	20155000	0	0
54	B4DDH1	cDNA FLJ53503, highly similar to Plasma serine protease inhibitor		B4DDH1;G3V5Q9;B4DPC7;B3KTV6;A0A024R6N9;P05154	tr|B4DDH1|B4DDH1_HUMAN cDNA FLJ53503, highly similar to Plasma serine protease inhibitor OS=Homo sapiens OX=9606 PE=2 SV=1;tr|G3V5Q9|G3V5Q9_HUMAN Plasma serine protease inhibitor (Fragment) OS=Homo sapiens OX=9606 GN=SERPINA5 PE=1 SV=1;tr|B4DPC7|B4DPC7_HUM	6	1	1	1	1	1	1	1	1	1	1	1	1	1	1	1	1	1	1	1	1	8.1	8.1	29.411	258	0	32.771	8.1	8.1	8.1	8.1	8.1	8.1	8.1	8.1	8.1	178980000	0	167960000	0	64369000	116730000	123460000	82397000
360	B4DDJ5	Macrophage scavenger receptor types I and II (cDNA FLJ55770, highly similar to Macrophage scavenger receptor types I and II)	MSR1	B4DDJ5;P21757;H0YBY2	tr|B4DDJ5|B4DDJ5_HUMAN cDNA FLJ55770, highly similar to Macrophage scavenger receptor types I and II OS=Homo sapiens OX=9606 GN=MSR1 PE=1 SV=1;sp|P21757|MSRE_HUMAN Macrophage scavenger receptor types I and II OS=Homo sapiens OX=9606 GN=MSR1 PE=1 SV=1;tr|H0	4	3	3	0	0	0	3	0	2	0	2	1	0	0	0	3	0	2	0	2	1	6.6	6.6	51.725	469	0	4.9518	0	0	0	6.6	0	4.7	0	4.7	2.1	0	0	0	17756000	0	18160000	0	8342800
362	B4DDQ4	cDNA FLJ53707, highly similar to Lysyl oxidase homolog 2		B4DDQ4;W6I206;W8QRJ0;Q9Y4K0	tr|B4DDQ4|B4DDQ4_HUMAN cDNA FLJ53707, highly similar to Lysyl oxidase homolog 2 OS=Homo sapiens OX=9606 PE=2 SV=1;tr|W6I206|W6I206_HUMAN Lysyl oxidase-like 2 delta e13 OS=Homo sapiens OX=9606 GN=LOXL2 PE=2 SV=1;tr|W8QRJ0|W8QRJ0_HUMAN Lysyl oxidase-like 2 p	4	1	1	0	0	0	1	0	0	0	0	0	0	0	0	1	0	0	0	0	0	6.3	6.3	35.332	318	0	29.089	0	0	0	6.3	0	0	0	0	0	0	0	0	6633600	0	0	0	0
364	B4DEC8	cDNA FLJ56340, highly similar to Beta-1,3-N-acetylglucosaminyltransferase radical fringe		B4DEC8;Q9Y644	tr|B4DEC8|B4DEC8_HUMAN cDNA FLJ56340, highly similar to Beta-1,3-N-acetylglucosaminyltransferase radical fringe OS=Homo sapiens OX=9606 PE=2 SV=1;sp|Q9Y644|RFNG_HUMAN Beta-1,3-N-acetylglucosaminyltransferase radical fringe OS=Homo sapiens OX=9606 GN=RFNG P	2	1	1	0	0	1	1	0	0	1	1	1	0	0	1	1	0	0	1	1	1	3.4	3.4	32.365	290	0.00491	0.75183	0	0	3.4	3.4	0	0	3.4	3.4	3.4	0	0	1625900	972810	0	0	0	1715900
20	B4DEL6	cDNA FLJ59669, highly similar to Homo sapiens phospholipase D family, member 3 (PLD3), transcript variant 1, mRNA		B4DEL6;A0A024R0Q4;Q8IV08	tr|B4DEL6|B4DEL6_HUMAN cDNA FLJ59669, highly similar to Homo sapiens phospholipase D family, member 3 (PLD3), transcript variant 1, mRNA OS=Homo sapiens OX=9606 PE=2 SV=1;tr|A0A024R0Q4|A0A024R0Q4_HUMAN Phospholipase D family, member 3, isoform CRA_b OS=Hom	3	1	1	0	1	0	1	0	0	1	0	1	0	1	0	1	0	0	1	0	1	2.7	2.7	44.822	402	0	3.6615	0	2.7	0	2.7	0	0	2.7	0	2.7	0	0	0	0	0	0	1845300	0
366	B4DEW5	cDNA FLJ54049, highly similar to Multimerin-2		B4DEW5;B4E3H8;Q9H8L6	tr|B4DEW5|B4DEW5_HUMAN cDNA FLJ54049, highly similar to Multimerin-2 OS=Homo sapiens OX=9606 PE=2 SV=1;tr|B4E3H8|B4E3H8_HUMAN cDNA FLJ54082, highly similar to Multimerin-2 OS=Homo sapiens OX=9606 PE=2 SV=1;sp|Q9H8L6|MMRN2_HUMAN Multimerin-2 OS=Homo sapiens	3	1	1	0	0	0	1	0	1	0	0	0	0	0	0	1	0	1	0	0	0	2.8	2.8	80.038	727	0	44.056	0	0	0	2.8	0	2.8	0	0	0	0	0	0	0	0	26886000	0	0
260	B4DF84	cDNA FLJ60463, highly similar to Homo sapiens glycosyltransferase 25 domain containing 2 (GLT25D2), mRNA		B4DF84;A0A3B3IT37;Q8IYK4;Q5SXQ3;B3KT71;B3KT92	tr|B4DF84|B4DF84_HUMAN cDNA FLJ60463, highly similar to Homo sapiens glycosyltransferase 25 domain containing 2 (GLT25D2), mRNA OS=Homo sapiens OX=9606 PE=2 SV=1;tr|A0A3B3IT37|A0A3B3IT37_HUMAN Procollagen galactosyltransferase 2 OS=Homo sapiens OX=9606 GN=	6	2	2	0	2	0	2	0	0	0	2	1	0	2	0	2	0	0	0	2	1	4.9	4.9	64.578	554	0	323.31	0	4.9	0	4.9	0	0	0	4.9	3.4	0	12333000	0	8884400	0	0	0	12995000
83	B4DFW1	cDNA FLJ52457, highly similar to Protein NOV homolog		B4DFW1;A0A024R9J4;P48745	tr|B4DFW1|B4DFW1_HUMAN cDNA FLJ52457, highly similar to Protein NOV homolog OS=Homo sapiens OX=9606 PE=2 SV=1;tr|A0A024R9J4|A0A024R9J4_HUMAN Nephroblastoma overexpressed gene, isoform CRA_a OS=Homo sapiens OX=9606 GN=NOV PE=4 SV=1;sp|P48745|NOV_HUMAN Prote	3	1	1	0	0	0	0	0	1	0	0	0	0	0	0	0	0	1	0	0	0	3.2	3.2	37.652	342	1	-2	0	0	0	0	0	3.2	0	0	0	0	0	0	0	0	5830100	0	0
367	B4DGC3	cDNA FLJ57921, highly similar to Apolipoprotein D		B4DGC3;C9JX71;C9JF17;P05090	tr|B4DGC3|B4DGC3_HUMAN cDNA FLJ57921, highly similar to Apolipoprotein D OS=Homo sapiens OX=9606 PE=2 SV=1;tr|C9JX71|C9JX71_HUMAN Apolipoprotein D (Fragment) OS=Homo sapiens OX=9606 GN=APOD PE=1 SV=1;tr|C9JF17|C9JF17_HUMAN Apolipoprotein D (Fragment) OS=Ho	4	3	3	3	2	2	2	1	1	2	2	1	3	2	2	2	1	1	2	2	1	30.5	30.5	14.397	128	0	323.31	30.5	27.3	20.3	27.3	10.2	10.2	27.3	27.3	17.2	2080500000	1562700000	2077600000	105200000	125910000	175850000	224480000	163410000
38	B4DGN8	cDNA FLJ53377, highly similar to Procollagen-lysine, 2-oxoglutarate 5-dioxygenase 1		B4DGN8;B2R5M9;A0A024R4H0;Q02809;Q5JXB7;B4DHT1	tr|B4DGN8|B4DGN8_HUMAN cDNA FLJ53377, highly similar to Procollagen-lysine, 2-oxoglutarate 5-dioxygenase 1 OS=Homo sapiens OX=9606 PE=2 SV=1;tr|B2R5M9|B2R5M9_HUMAN cDNA, FLJ92537, highly similar to Homo sapiens procollagen-lysine, 2-oxoglutarate 5-dioxygen	6	2	2	2	2	2	2	2	2	2	2	1	2	2	2	2	2	2	2	2	1	2.6	2.6	79.398	690	0	154.74	2.6	2.6	2.6	2.6	2.6	2.6	2.6	2.6	1.2	143450000	87024000	82683000	208830000	151820000	126140000	68365000	57757000
140	B4DHM2	cDNA FLJ57983, highly similar to Cat eye syndrome critical region protein 1		B4DHM2;A0A087X0I3;B4E3Q4;B2RAS2;Q9NZK5	tr|B4DHM2|B4DHM2_HUMAN cDNA FLJ57983, highly similar to Cat eye syndrome critical region protein 1 OS=Homo sapiens OX=9606 PE=2 SV=1;tr|A0A087X0I3|A0A087X0I3_HUMAN Adenosine deaminase 2 OS=Homo sapiens OX=9606 GN=ADA2 PE=1 SV=1;tr|B4E3Q4|B4E3Q4_HUMAN Adeno	5	1	1	0	0	0	1	0	0	0	1	0	0	0	0	1	0	0	0	1	0	5.2	5.2	30.114	252	0	7.7276	0	0	0	5.2	0	0	0	5.2	0	0	0	0	9482800	0	0	0	15439000
369	B4DHZ6	Transferrin, isoform CRA_c (cDNA FLJ54029, highly similar to Serotransferrin)	TF hCG_2023558	B4DHZ6;B4DI57;B4E1B2;Q53H26;Q06AH7;P02787;A0A0K0K1H8	tr|B4DHZ6|B4DHZ6_HUMAN Transferrin, isoform CRA_c OS=Homo sapiens OX=9606 GN=TF PE=2 SV=1;tr|B4DI57|B4DI57_HUMAN cDNA FLJ54111, highly similar to Serotransferrin OS=Homo sapiens OX=9606 PE=2 SV=1;tr|B4E1B2|B4E1B2_HUMAN cDNA FLJ53691, highly similar to Sero	7	4	4	2	3	2	2	1	2	2	4	2	2	3	2	2	1	2	2	4	2	14.6	14.6	47.387	424	0	323.31	8	10.8	8	8	3.1	8	8	14.6	8	114420000	405020000	193840000	376520000	146710000	349900000	459150000	651760000
361	B4DIF5	Cell cycle control protein		B4DIF5;B4DDK3;Q9NV96	tr|B4DIF5|B4DIF5_HUMAN Cell cycle control protein OS=Homo sapiens OX=9606 PE=2 SV=1;tr|B4DDK3|B4DDK3_HUMAN Cell cycle control protein OS=Homo sapiens OX=9606 PE=2 SV=1;sp|Q9NV96|CC50A_HUMAN Cell cycle control protein 50A OS=Homo sapiens OX=9606 GN=TMEM30A	3	1	1	0	0	0	1	0	0	0	0	0	0	0	0	1	0	0	0	0	0	4.9	4.9	39.218	345	0	1.8261	0	0	0	4.9	0	0	0	0	0	0	0	0	6304000	0	0	0	0
159	B4DIP7	cDNA FLJ57114, highly similar to Niemann-Pick C1 protein		B4DIP7;A0A0S2A5C8;K7EQ23;A0A193DRS0;A0A0A8JCD0;Q59GR1;O15118	tr|B4DIP7|B4DIP7_HUMAN cDNA FLJ57114, highly similar to Niemann-Pick C1 protein OS=Homo sapiens OX=9606 PE=2 SV=1;tr|A0A0S2A5C8|A0A0S2A5C8_HUMAN Truncated Niemann-Pick C1 OS=Homo sapiens OX=9606 GN=NPC1 PE=4 SV=1;tr|K7EQ23|K7EQ23_HUMAN NPC intracellular ch	7	1	1	0	0	0	1	0	0	0	0	0	0	0	0	1	0	0	0	0	0	1.5	1.5	86.357	776	0.0053571	1.231	0	0	0	1.5	0	0	0	0	0	0	0	0	1875700	0	0	0	0
370	B4DJ06	cDNA FLJ56620		B4DJ06	tr|B4DJ06|B4DJ06_HUMAN cDNA FLJ56620 OS=Homo sapiens OX=9606 PE=2 SV=1	1	1	1	1	1	0	1	0	0	1	1	0	1	1	0	1	0	0	1	1	0	3	3	67.946	629	0	63.831	3	3	0	3	0	0	3	3	0	0	8600500	0	9442600	0	0	12753000	7897300
372	B4DJN0	cDNA FLJ51641, highly similar to Nicastrin		B4DJN0	tr|B4DJN0|B4DJN0_HUMAN cDNA FLJ51641, highly similar to Nicastrin OS=Homo sapiens OX=9606 PE=2 SV=1	1	4	1	0	0	0	3	1	1	2	0	0	0	0	0	1	1	1	0	0	0	14.4	3.3	50.288	451	1	-2	0	0	0	10	3.3	3.3	8.6	0	0	0	0	0	5347000	0	0	0	0
373	B4DJQ8	cDNA FLJ55694, highly similar to Dipeptidyl-peptidase 1		B4DJQ8;P53634;I3V9V6;I3V9V3;H0YCY8	tr|B4DJQ8|B4DJQ8_HUMAN cDNA FLJ55694, highly similar to Dipeptidyl-peptidase 1 OS=Homo sapiens OX=9606 PE=2 SV=1;sp|P53634|CATC_HUMAN Dipeptidyl peptidase 1 OS=Homo sapiens OX=9606 GN=CTSC PE=1 SV=2;tr|I3V9V6|I3V9V6_HUMAN Dipeptidyl peptidase 1 isoform a p	5	2	2	0	0	0	1	0	0	1	2	1	0	0	0	1	0	0	1	2	1	7	7	50.151	446	0	59.573	0	0	0	4.3	0	0	4.3	7	4.3	0	0	0	8725000	0	0	37606000	32701000
255	B4DJU3	cDNA FLJ50742, highly similar to Inositol 1,4,5-trisphosphate receptor type 1		B4DJU3;B4DGH1;B7ZMI3;Q59H91;A0A3B3IRP0;A0A3B3IU13;A0A3B3IU05;A0A3B3ITQ1;A0A3B3ITU8;A0A3B3IU04;Q14643	tr|B4DJU3|B4DJU3_HUMAN cDNA FLJ50742, highly similar to Inositol 1,4,5-trisphosphate receptor type 1 OS=Homo sapiens OX=9606 PE=2 SV=1;tr|B4DGH1|B4DGH1_HUMAN cDNA FLJ54348, highly similar to Inositol 1,4,5-trisphosphate receptor type 1 OS=Homo sapiens OX=9	11	1	1	0	0	0	1	0	0	0	1	0	0	0	0	1	0	0	0	1	0	3	3	49.444	434	0.0053381	1.222	0	0	0	3	0	0	0	3	0	0	0	0	763850	0	0	0	462560
302	B4DK26	cDNA FLJ61301, highly similar to CD276 antigen		B4DK26;A8K6Q6;Q5ZPR3;A8K9J6;A0A0C4DGH0;H0YLT8;H0YN85;H0YK40;H0YK59	tr|B4DK26|B4DK26_HUMAN cDNA FLJ61301, highly similar to CD276 antigen OS=Homo sapiens OX=9606 PE=2 SV=1;tr|A8K6Q6|A8K6Q6_HUMAN cDNA FLJ78639 OS=Homo sapiens OX=9606 PE=2 SV=1;sp|Q5ZPR3|CD276_HUMAN CD276 antigen OS=Homo sapiens OX=9606 GN=CD276 PE=1 SV=1;tr	13	4	4	0	0	0	3	3	2	3	3	2	0	0	0	3	3	2	3	3	2	18.3	18.3	51.725	480	0	133.33	0	0	0	16.5	16.5	10.6	16.5	16.2	12.5	0	0	0	142920000	228680000	161840000	105810000	106730000
215	B4DLJ6	cDNA FLJ56989, highly similar to Macrophage receptor MARCO		B4DLJ6;A0A1S5UZ24;Q4ZG40;Q9UEW3	tr|B4DLJ6|B4DLJ6_HUMAN cDNA FLJ56989, highly similar to Macrophage receptor MARCO OS=Homo sapiens OX=9606 PE=2 SV=1;tr|A0A1S5UZ24|A0A1S5UZ24_HUMAN Macrophage receptor OS=Homo sapiens OX=9606 GN=MARCO PE=2 SV=1;tr|Q4ZG40|Q4ZG40_HUMAN Macrophage receptor wit	4	1	1	0	1	1	1	1	1	1	1	1	0	1	1	1	1	1	1	1	1	2.4	2.4	49.733	495	0	44.445	0	2.4	2.4	2.4	2.4	2.4	2.4	2.4	2.4	0	14464000	5119500	27916000	27151000	21963000	60523000	21791000
376	B4DLK9	cDNA FLJ56855, highly similar to Macrophage mannose receptor 1		B4DLK9;Q0Z8D6;B9EJA8;P22897	tr|B4DLK9|B4DLK9_HUMAN cDNA FLJ56855, highly similar to Macrophage mannose receptor 1 OS=Homo sapiens OX=9606 PE=2 SV=1;tr|Q0Z8D6|Q0Z8D6_HUMAN Mannose receptor OS=Homo sapiens OX=9606 PE=2 SV=1;tr|B9EJA8|B9EJA8_HUMAN Mannose receptor, C type 1-like 1 OS=Ho	4	1	1	0	0	0	1	0	0	0	0	0	0	0	0	1	0	0	0	0	0	3	3	72.296	636	0	43.914	0	0	0	3	0	0	0	0	0	0	0	0	9435600	0	0	0	0
86	B4DLL8	cDNA FLJ59335, highly similar to Transmembrane glycoprotein NMB		B4DLL8;B4DLJ7;B2R5R1;A8K7R3;A0A024RA55;A0A3B3ISS6;B4E3D4;Q14956;B4DZS5;B4DN79;B4DLL5	tr|B4DLL8|B4DLL8_HUMAN cDNA FLJ59335, highly similar to Transmembrane glycoprotein NMB OS=Homo sapiens OX=9606 PE=2 SV=1;tr|B4DLJ7|B4DLJ7_HUMAN cDNA FLJ59334, highly similar to Transmembrane glycoprotein NMB OS=Homo sapiens OX=9606 PE=2 SV=1;tr|B2R5R1|B2R5	11	2	2	0	0	0	1	0	0	0	1	1	0	0	0	1	0	0	0	1	1	7.3	7.3	50.579	455	0	83.116	0	0	0	4.6	0	0	0	2.6	2.6	0	0	0	63575000	0	0	0	0
378	B4DN67	Kin of IRRE-like protein 1 (cDNA FLJ56360, highly similar to Kin of IRRE-like protein 1)	KIRREL1	B4DN67;Q96J84	tr|B4DN67|B4DN67_HUMAN cDNA FLJ56360, highly similar to Kin of IRRE-like protein 1 OS=Homo sapiens OX=9606 GN=KIRREL1 PE=1 SV=1;sp|Q96J84|KIRR1_HUMAN Kin of IRRE-like protein 1 OS=Homo sapiens OX=9606 GN=KIRREL1 PE=1 SV=2	2	1	1	0	0	0	1	0	0	0	0	0	0	0	0	1	0	0	0	0	0	3	3	72.721	657	0	1.5516	0	0	0	3	0	0	0	0	0	0	0	0	2253600	0	0	0	0
379	B4DN75	cDNA FLJ60724, highly similar to Cartilage oligomeric matrix protein		B4DN75	tr|B4DN75|B4DN75_HUMAN cDNA FLJ60724, highly similar to Cartilage oligomeric matrix protein OS=Homo sapiens OX=9606 PE=2 SV=1	1	25	2	3	5	12	8	2	2	11	18	17	0	0	1	0	0	0	1	2	2	51.5	5.8	75.101	684	0	225.22	9.4	12.1	24	23	6.4	6.4	28.9	43.6	40.2	0	0	42762000	0	0	0	47715000	49130000
380	B4DNB1	cDNA FLJ52001, highly similar to SPARC-related modular calcium-binding protein 2 (cDNA, FLJ78819, highly similar to SPARC-related modular calcium-binding protein 2)		B4DNB1;Q9H3U7	tr|B4DNB1|B4DNB1_HUMAN cDNA FLJ52001, highly similar to SPARC-related modular calcium-binding protein 2 OS=Homo sapiens OX=9606 PE=2 SV=1;sp|Q9H3U7|SMOC2_HUMAN SPARC-related modular calcium-binding protein 2 OS=Homo sapiens OX=9606 GN=SMOC2 PE=2 SV=2	2	1	1	0	1	0	0	0	0	1	0	1	0	1	0	0	0	0	1	0	1	9.8	9.8	13.896	123	0	23.915	0	9.8	0	0	0	0	9.8	0	9.8	0	6672700	0	0	0	0	8437100	0
381	B4DNE0	cDNA FLJ52573, highly similar to Elongation factor 1-alpha 1		B4DNE0;Q53G85;A0A087WVQ9;Q6IPN6;Q6IPT9;Q6IPS9;Q53HR5;Q53HM9;Q5VTE0;P68104;Q53GE9;A8K9C4;Q53HQ7	tr|B4DNE0|B4DNE0_HUMAN cDNA FLJ52573, highly similar to Elongation factor 1-alpha 1 OS=Homo sapiens OX=9606 PE=2 SV=1;tr|Q53G85|Q53G85_HUMAN Elongation factor 1-alpha (Fragment) OS=Homo sapiens OX=9606 PE=2 SV=1;tr|A0A087WVQ9|A0A087WVQ9_HUMAN Elongation fa	38	3	3	1	2	1	1	0	0	0	0	0	1	2	1	1	0	0	0	0	0	14.7	14.7	42.596	395	0	2.4748	3.8	8.6	3.8	6.1	0	0	0	0	0	18540000	28824000	7671000	0	0	0	0	0
382	B4DNG0	Olfactomedin-like protein 3 (cDNA FLJ58142, highly similar to Olfactomedin-like protein 3)	OLFML3	B4DNG0;M1LAK4;Q9NRN5	tr|B4DNG0|B4DNG0_HUMAN cDNA FLJ58142, highly similar to Olfactomedin-like protein 3 OS=Homo sapiens OX=9606 GN=OLFML3 PE=1 SV=1;tr|M1LAK4|M1LAK4_HUMAN Olfactomedin-like 3, isoform CRA_b OS=Homo sapiens OX=9606 GN=OLFML3 PE=4 SV=1;sp|Q9NRN5|OLFL3_HUMAN Olfa	3	2	2	1	2	1	1	1	1	2	1	2	1	2	1	1	1	1	2	1	2	6.7	6.7	38.982	345	0	200.27	4.9	6.7	4.9	4.9	4.9	4.9	6.7	4.9	6.7	0	46953000	18881000	231670000	27427000	38994000	159430000	332000000
383	B4DNM8	cDNA FLJ53395, highly similar to Prolyl 3-hydroxylase 1		B4DNM8;Q32P28;Q68CW0;H7C2W6	tr|B4DNM8|B4DNM8_HUMAN cDNA FLJ53395, highly similar to Prolyl 3-hydroxylase 1 OS=Homo sapiens OX=9606 PE=2 SV=1;sp|Q32P28|P3H1_HUMAN Prolyl 3-hydroxylase 1 OS=Homo sapiens OX=9606 GN=P3H1 PE=1 SV=2;tr|Q68CW0|Q68CW0_HUMAN Uncharacterized protein DKFZp547C1	4	2	2	0	0	0	1	0	1	0	2	1	0	0	0	1	0	1	0	2	1	3.7	3.7	68.988	601	0	57.017	0	0	0	1.2	0	2.5	0	3.7	2.5	0	0	0	0	0	31444000	0	0
246	B4DNT6	cDNA FLJ53631, highly similar to Intercellular adhesion molecule 1		B4DNT6;B4DQW5;Q5NKV8;A0A384MEK5;P05362;Q15462;K7EKL8	tr|B4DNT6|B4DNT6_HUMAN cDNA FLJ53631, highly similar to Intercellular adhesion molecule 1 OS=Homo sapiens OX=9606 PE=2 SV=1;tr|B4DQW5|B4DQW5_HUMAN cDNA FLJ53641, highly similar to Intercellular adhesion molecule 1 OS=Homo sapiens OX=9606 PE=2 SV=1;tr|Q5NKV	10	3	3	3	3	3	2	3	3	3	3	2	3	3	3	2	3	3	3	3	2	7.7	7.7	48.442	442	0	40.712	7.7	7.7	7.7	4.3	7.7	7.7	7.7	7.7	5.7	131310000	85043000	70652000	109670000	81615000	167020000	45736000	91425000
375	B4DPC6	cDNA FLJ51022, highly similar to Extracellular matrix protein 2		B4DPC6;B4E1N8;Q3KR19;B4DK93;O94769	tr|B4DPC6|B4DPC6_HUMAN cDNA FLJ51022, highly similar to Extracellular matrix protein 2 OS=Homo sapiens OX=9606 PE=2 SV=1;tr|B4E1N8|B4E1N8_HUMAN cDNA FLJ51183, highly similar to Extracellular matrix protein 2 OS=Homo sapiens OX=9606 PE=2 SV=1;tr|Q3KR19|Q3KR	5	1	1	1	1	1	1	1	1	1	1	1	1	1	1	1	1	1	1	1	1	3	3	41.87	367	0	6.1188	3	3	3	3	3	3	3	3	3	30713000	34635000	63688000	86352000	207050000	191490000	219440000	150570000
233	B4DPP0	cDNA FLJ51032, highly similar to CD9 antigen		B4DPP0;A6NNI4;A0A2R8Y478;G8JLH6;P21926	tr|B4DPP0|B4DPP0_HUMAN cDNA FLJ51032, highly similar to CD9 antigen OS=Homo sapiens OX=9606 PE=2 SV=1;tr|A6NNI4|A6NNI4_HUMAN Tetraspanin OS=Homo sapiens OX=9606 GN=CD9 PE=1 SV=1;tr|A0A2R8Y478|A0A2R8Y478_HUMAN Tetraspanin OS=Homo sapiens OX=9606 GN=CD9 PE=1	5	1	1	0	0	1	1	1	1	0	0	0	0	0	1	1	1	1	0	0	0	17.7	17.7	15.906	141	0	63.857	0	0	17.7	17.7	17.7	17.7	0	0	0	0	0	24613000	27255000	59735000	39464000	0	0
60	B4DPP4	cDNA FLJ56646, highly similar to Transmembrane emp24 domain-containing protein 9		B4DPP4;A0A024R7M0;Q9BVK6	tr|B4DPP4|B4DPP4_HUMAN cDNA FLJ56646, highly similar to Transmembrane emp24 domain-containing protein 9 OS=Homo sapiens OX=9606 PE=2 SV=1;tr|A0A024R7M0|A0A024R7M0_HUMAN Transmembrane emp24 protein transport domain containing 9, isoform CRA_a OS=Homo sapien	3	1	1	1	1	1	1	1	0	0	0	0	1	1	1	1	1	0	0	0	0	17.4	17.4	13.735	121	0	33.148	17.4	17.4	17.4	17.4	17.4	0	0	0	0	21245000	33953000	12973000	60035000	90529000	0	0	0
386	B4DPP8	cDNA FLJ53075, highly similar to Kininogen-1		B4DPP8;P01042	tr|B4DPP8|B4DPP8_HUMAN cDNA FLJ53075, highly similar to Kininogen-1 OS=Homo sapiens OX=9606 PE=2 SV=1;sp|P01042|KNG1_HUMAN Kininogen-1 OS=Homo sapiens OX=9606 GN=KNG1 PE=1 SV=2	2	3	1	2	2	1	3	2	2	2	2	2	0	0	0	1	0	0	0	0	0	11.1	5.3	46.496	415	0	148.61	5.8	5.8	2.9	11.1	5.8	5.8	5.8	5.8	5.8	0	0	0	14258000	0	0	0	0
204	B4DPY4	cDNA FLJ54272, highly similar to Complement decay-accelerating factor		B4DPY4;H3BLV0;B2R658;A0A172WBW8;B1AP13;H7BY55;P08174	tr|B4DPY4|B4DPY4_HUMAN cDNA FLJ54272, highly similar to Complement decay-accelerating factor OS=Homo sapiens OX=9606 PE=2 SV=1;tr|H3BLV0|H3BLV0_HUMAN Complement decay-accelerating factor (Fragment) OS=Homo sapiens OX=9606 GN=CD55 PE=1 SV=1;tr|B2R658|B2R658	7	1	1	1	1	1	1	0	0	1	1	1	1	1	1	1	0	0	1	1	1	10.1	10.1	14.337	129	0	295.82	10.1	10.1	10.1	10.1	0	0	10.1	10.1	10.1	16481000	85106000	60222000	106540000	0	0	163690000	134790000
175	B4DQA0	L-selectin		B4DQA0;A0A0H5AY34;Q8WW79;P14151	tr|B4DQA0|B4DQA0_HUMAN L-selectin OS=Homo sapiens OX=9606 PE=2 SV=1;tr|A0A0H5AY34|A0A0H5AY34_HUMAN L-selectin OS=Homo sapiens OX=9606 GN=SELL PE=2 SV=1;tr|Q8WW79|Q8WW79_HUMAN L-selectin OS=Homo sapiens OX=9606 GN=SELL PE=2 SV=1;sp|P14151|LYAM1_HUMAN L-sele	4	1	1	0	0	0	0	0	0	0	1	0	0	0	0	0	0	0	0	1	0	3.7	3.7	36.342	325	0	26.411	0	0	0	0	0	0	0	3.7	0	0	0	0	0	0	0	0	2798300
387	B4DQZ0	cDNA FLJ57066, highly similar to Collagen alpha-1(XI) chain		B4DQZ0;Q59HB5;D3DT71;D3DT72;P12107	tr|B4DQZ0|B4DQZ0_HUMAN cDNA FLJ57066, highly similar to Collagen alpha-1(XI) chain OS=Homo sapiens OX=9606 PE=2 SV=1;tr|Q59HB5|Q59HB5_HUMAN Alpha 1 type XI collagen isoform C preproprotein variant (Fragment) OS=Homo sapiens OX=9606 PE=2 SV=1;tr|D3DT71|D3DT	5	1	1	0	0	0	1	0	1	1	1	0	0	0	0	1	0	1	1	1	0	7.9	7.9	24.184	214	0	34.854	0	0	0	7.9	0	7.9	7.9	7.9	0	0	0	0	10403000	0	11829000	5647100	19222000
87	B4DRK1	cDNA FLJ50841, highly similar to Zinc finger protein GLI3		B4DRK1;A0A2R8YGX0;A0A024RA92;P10071	tr|B4DRK1|B4DRK1_HUMAN cDNA FLJ50841, highly similar to Zinc finger protein GLI3 OS=Homo sapiens OX=9606 PE=2 SV=1;tr|A0A2R8YGX0|A0A2R8YGX0_HUMAN Transcriptional activator GLI3 OS=Homo sapiens OX=9606 GN=GLI3 PE=1 SV=1;tr|A0A024RA92|A0A024RA92_HUMAN GLI-Kr	4	1	1	0	0	0	0	0	0	1	1	1	0	0	0	0	0	0	1	1	1	1.1	1.1	163.34	1521	1	-2	0	0	0	0	0	0	1.1	1.1	1.1	0	0	0	0	0	0	4543800	0
265	B4DRZ0	cDNA FLJ61364, highly similar to Gamma-glutamyltransferase 4		B4DRZ0;A0PJJ9;A4FU32;A5D8W8;Q9UJ14	tr|B4DRZ0|B4DRZ0_HUMAN cDNA FLJ61364, highly similar to Gamma-glutamyltransferase 4 OS=Homo sapiens OX=9606 PE=2 SV=1;tr|A0PJJ9|A0PJJ9_HUMAN GGT7 protein (Fragment) OS=Homo sapiens OX=9606 GN=GGT7 PE=2 SV=1;tr|A4FU32|A4FU32_HUMAN GGT7 protein (Fragment) OS	5	1	1	0	0	0	1	0	0	0	0	0	0	0	0	1	0	0	0	0	0	3.6	3.6	29.477	279	1	-2	0	0	0	3.6	0	0	0	0	0	0	0	0	0	0	0	0	0
390	B4DS89	cDNA FLJ53091, highly similar to GDNF family receptor alpha-2		B4DS89;O00451	tr|B4DS89|B4DS89_HUMAN cDNA FLJ53091, highly similar to GDNF family receptor alpha-2 OS=Homo sapiens OX=9606 PE=2 SV=1;sp|O00451|GFRA2_HUMAN GDNF family receptor alpha-2 OS=Homo sapiens OX=9606 GN=GFRA2 PE=1 SV=2	2	1	1	0	0	0	0	0	0	1	0	0	0	0	0	0	0	0	1	0	0	5.1	5.1	36.427	331	0	2.3768	0	0	0	0	0	0	5.1	0	0	0	0	0	0	0	0	0	0
136	B4DTC0	cDNA FLJ53096, highly similar to Collagen alpha-2(V) chain		B4DTC0;D3DPH5;A0A087WYX9;Q5PR22;P05997	tr|B4DTC0|B4DTC0_HUMAN cDNA FLJ53096, highly similar to Collagen alpha-2(V) chain OS=Homo sapiens OX=9606 PE=2 SV=1;tr|D3DPH5|D3DPH5_HUMAN Collagen, type V, alpha 2, isoform CRA_b OS=Homo sapiens OX=9606 GN=COL5A2 PE=4 SV=1;tr|A0A087WYX9|A0A087WYX9_HUMAN C	5	1	1	0	0	1	1	1	1	1	1	1	0	0	1	1	1	1	1	1	1	3	3	39.993	362	0	6.3768	0	0	3	3	3	3	3	3	3	0	0	8627700	110970000	78767000	81587000	50305000	62771000
74	B4DTH4	cDNA FLJ51304, highly similar to Angiopoietin-related protein 1		B4DTH4;Q53F22;A0A024R908;O95841	tr|B4DTH4|B4DTH4_HUMAN cDNA FLJ51304, highly similar to Angiopoietin-related protein 1 OS=Homo sapiens OX=9606 PE=2 SV=1;tr|Q53F22|Q53F22_HUMAN Angiopoietin-like 1 variant (Fragment) OS=Homo sapiens OX=9606 PE=2 SV=1;tr|A0A024R908|A0A024R908_HUMAN Angiopoi	4	1	1	0	0	0	1	0	0	1	1	1	0	0	0	1	0	0	1	1	1	3.6	3.6	32.239	280	0	2.3789	0	0	0	3.6	0	0	3.6	3.6	3.6	0	0	0	2207700	0	0	5552000	4902100
391	B4DTY8	cDNA FLJ61587, highly similar to Integrin alpha-1 (Fragment)		B4DTY8;P56199	tr|B4DTY8|B4DTY8_HUMAN cDNA FLJ61587, highly similar to Integrin alpha-1 (Fragment) OS=Homo sapiens OX=9606 PE=2 SV=1;sp|P56199|ITA1_HUMAN Integrin alpha-1 OS=Homo sapiens OX=9606 GN=ITGA1 PE=1 SV=2	2	6	6	0	1	0	6	3	3	1	3	0	0	1	0	6	3	3	1	3	0	7.2	7.2	130	1173	0	119.94	0	0.9	0	7.2	3	3.9	1.8	4	0	0	0	0	66466000	74864000	76950000	46947000	59780000
392	B4DTZ8	cDNA FLJ52277, highly similar to Follistatin-related protein 1		B4DTZ8;Q12841	tr|B4DTZ8|B4DTZ8_HUMAN cDNA FLJ52277, highly similar to Follistatin-related protein 1 OS=Homo sapiens OX=9606 PE=2 SV=1;sp|Q12841|FSTL1_HUMAN Follistatin-related protein 1 OS=Homo sapiens OX=9606 GN=FSTL1 PE=1 SV=1	2	1	1	0	0	0	1	0	0	0	1	0	0	0	0	1	0	0	0	1	0	4	4	28.412	251	0.004918	0.75183	0	0	0	4	0	0	0	4	0	0	0	0	17297000	0	0	0	26079000
374	B4DU57	cDNA FLJ50051, highly similar to Carboxypeptidase-like protein X2		B4DU57;Q658N0;B4DK28;B4E1X6;Q8N436	tr|B4DU57|B4DU57_HUMAN cDNA FLJ50051, highly similar to Carboxypeptidase-like protein X2 OS=Homo sapiens OX=9606 PE=2 SV=1;tr|Q658N0|Q658N0_HUMAN Uncharacterized protein DKFZp666J235 (Fragment) OS=Homo sapiens OX=9606 GN=DKFZp666J235 PE=2 SV=1;tr|B4DK28|B4	5	1	1	0	1	0	1	1	1	1	1	1	0	1	0	1	1	1	1	1	1	2.2	2.2	58.665	511	0	3.4464	0	2.2	0	2.2	2.2	2.2	2.2	2.2	2.2	0	18530000	0	23515000	13747000	49383000	0	23472000
314	B4DUJ2	cDNA FLJ54063, highly similar to Homo sapiens CD74 antigen, transcript variant 2, mRNA		B4DUJ2;H0YBZ2;U6FVB0;A9YLN4;M1VPF6;P04233	tr|B4DUJ2|B4DUJ2_HUMAN cDNA FLJ54063, highly similar to Homo sapiens CD74 antigen, transcript variant 2, mRNA OS=Homo sapiens OX=9606 PE=2 SV=1;tr|H0YBZ2|H0YBZ2_HUMAN HLA class II histocompatibility antigen gamma chain (Fragment) OS=Homo sapiens OX=9606 GN	6	1	1	0	0	0	1	0	0	0	0	0	0	0	0	1	0	0	0	0	0	13.9	13.9	16.67	144	0	12.329	0	0	0	13.9	0	0	0	0	0	0	0	0	6517300	0	0	0	0
184	B4DVE1	cDNA FLJ53478, highly similar to Galectin-3-binding protein		B4DVE1;A0A0S2Z3Y1;Q08380;K7ESM3;K7EKQ5;K7EP36;B4DI70;B4DWA8;B3KP88;B4DDG4	tr|B4DVE1|B4DVE1_HUMAN cDNA FLJ53478, highly similar to Galectin-3-binding protein OS=Homo sapiens OX=9606 PE=2 SV=1;tr|A0A0S2Z3Y1|A0A0S2Z3Y1_HUMAN Lectin galactoside-binding soluble 3 binding protein isoform 1 (Fragment) OS=Homo sapiens OX=9606 GN=LGALS3B	15	5	5	0	0	0	5	3	4	1	4	3	0	0	0	5	3	4	1	4	3	11.9	11.9	64.096	573	0	192.28	0	0	0	11.9	6.3	8.6	2.3	8.6	6.5	0	0	0	216200000	149390000	252510000	11144000	52901000
155	B4DVS2	cDNA FLJ57617		B4DVS2;B4DZS8;A0A0A0MT60;Q5T1M5	tr|B4DVS2|B4DVS2_HUMAN cDNA FLJ57617 OS=Homo sapiens OX=9606 PE=2 SV=1;tr|B4DZS8|B4DZS8_HUMAN Peptidylprolyl isomerase (Fragment) OS=Homo sapiens OX=9606 PE=2 SV=1;tr|A0A0A0MT60|A0A0A0MT60_HUMAN Peptidylprolyl isomerase (Fragment) OS=Homo sapiens OX=9606 G	4	1	1	0	0	0	1	0	1	1	0	0	0	0	0	1	0	1	1	0	0	2.6	2.6	88.888	800	1	-2	0	0	0	2.6	0	2.6	2.6	0	0	0	0	0	20226000	0	15147000	21164000	0
183	B4DWE0	cDNA FLJ50260, highly similar to Cytochrome b-245 heavy chain		B4DWE0;A0A0S2Z3S6;P04839;A0A0S2Z4A9	tr|B4DWE0|B4DWE0_HUMAN cDNA FLJ50260, highly similar to Cytochrome b-245 heavy chain OS=Homo sapiens OX=9606 PE=2 SV=1;tr|A0A0S2Z3S6|A0A0S2Z3S6_HUMAN Cytochrome b-245 beta polypeptide isoform 1 (Fragment) OS=Homo sapiens OX=9606 GN=CYBB PE=2 SV=1;sp|P04839	4	3	3	0	0	0	3	0	1	0	1	0	0	0	0	3	0	1	0	1	0	8.4	8.4	61.311	538	0	39.63	0	0	0	8.4	0	1.9	0	3.3	0	0	0	0	16363000	0	7433500	0	0
398	B4DX19	cDNA FLJ57644, highly similar to Serum paraoxonase/arylesterase 1		B4DX19;P27169	tr|B4DX19|B4DX19_HUMAN cDNA FLJ57644, highly similar to Serum paraoxonase/arylesterase 1 OS=Homo sapiens OX=9606 PE=2 SV=1;sp|P27169|PON1_HUMAN Serum paraoxonase/arylesterase 1 OS=Homo sapiens OX=9606 GN=PON1 PE=1 SV=3	2	2	2	0	1	0	2	0	1	1	1	2	0	1	0	2	0	1	1	1	2	9	9	39.721	355	0	312.77	0	6.2	0	9	0	2.8	2.8	2.8	9	0	16094000	0	64331000	0	22380000	23563000	28483000
342	B4DX43	cDNA FLJ52980, highly similar to CD166 antigen		B4DX43;F5GXJ9;B3KNN9;Q13740	tr|B4DX43|B4DX43_HUMAN cDNA FLJ52980, highly similar to CD166 antigen OS=Homo sapiens OX=9606 PE=2 SV=1;tr|F5GXJ9|F5GXJ9_HUMAN CD166 antigen OS=Homo sapiens OX=9606 GN=ALCAM PE=1 SV=1;tr|B3KNN9|B3KNN9_HUMAN cDNA FLJ30070 fis, clone ASTRO2000046, highly sim	4	2	2	0	0	0	1	0	0	0	1	0	0	0	0	1	0	0	0	1	0	12.2	12.2	31.612	279	0	78.632	0	0	0	5.4	0	0	0	6.8	0	0	0	0	0	0	0	0	7093900
399	B4DZ36	cDNA FLJ58441, highly similar to Attractin		B4DZ36;O75882	tr|B4DZ36|B4DZ36_HUMAN cDNA FLJ58441, highly similar to Attractin OS=Homo sapiens OX=9606 PE=2 SV=1;sp|O75882|ATRN_HUMAN Attractin OS=Homo sapiens OX=9606 GN=ATRN PE=1 SV=2	2	3	3	0	0	1	1	0	0	0	0	1	0	0	1	1	0	0	0	0	1	2.6	2.6	129.83	1156	0	10.537	0	0	0.5	1.3	0	0	0	0	0.8	0	0	0	3201600	0	0	0	0
401	B4DZA5	Anoctamin		B4DZA5;Q4KMQ2	tr|B4DZA5|B4DZA5_HUMAN Anoctamin OS=Homo sapiens OX=9606 PE=2 SV=1;sp|Q4KMQ2|ANO6_HUMAN Anoctamin-6 OS=Homo sapiens OX=9606 GN=ANO6 PE=1 SV=2	2	1	1	0	0	0	1	1	1	0	1	0	0	0	0	1	1	1	0	1	0	1.5	1.5	108.03	929	0	7.4415	0	0	0	1.5	1.5	1.5	0	1.5	0	0	0	0	0	17586000	12522000	0	0
196	B4E0H8	cDNA FLJ60385, highly similar to Integrin alpha-3		B4E0H8;A0A140VJM0;P26006	tr|B4E0H8|B4E0H8_HUMAN cDNA FLJ60385, highly similar to Integrin alpha-3 OS=Homo sapiens OX=9606 PE=2 SV=1;tr|A0A140VJM0|A0A140VJM0_HUMAN Testicular tissue protein Li 96 OS=Homo sapiens OX=9606 PE=2 SV=1;sp|P26006|ITA3_HUMAN Integrin alpha-3 OS=Homo sapien	3	1	1	0	0	0	1	0	0	0	1	0	0	0	0	1	0	0	0	1	0	1.1	1.1	115.17	1037	0	2.863	0	0	0	1.1	0	0	0	1.1	0	0	0	0	2560800	0	0	0	3133400
300	B4E0K9	Alpha-mannosidase (EC 3.2.1.-)		B4E0K9;Q59E90;A8K6A7;O00754	tr|B4E0K9|B4E0K9_HUMAN Alpha-mannosidase OS=Homo sapiens OX=9606 PE=2 SV=1;tr|Q59E90|Q59E90_HUMAN Alpha-mannosidase (Fragment) OS=Homo sapiens OX=9606 PE=2 SV=1;tr|A8K6A7|A8K6A7_HUMAN Alpha-mannosidase OS=Homo sapiens OX=9606 PE=2 SV=1;sp|O00754|MA2B1_HUMA	4	1	1	0	0	0	1	0	0	0	0	0	0	0	0	1	0	0	0	0	0	1.8	1.8	107.46	950	0	12.627	0	0	0	1.8	0	0	0	0	0	0	0	0	5869000	0	0	0	0
59	B4E0Z6	cDNA FLJ59809, highly similar to Bone marrow stromal antigen 2		B4E0Z6;A0A024R7H5;Q10589	tr|B4E0Z6|B4E0Z6_HUMAN cDNA FLJ59809, highly similar to Bone marrow stromal antigen 2 OS=Homo sapiens OX=9606 PE=2 SV=1;tr|A0A024R7H5|A0A024R7H5_HUMAN Bone marrow stromal antigen 2 OS=Homo sapiens OX=9606 GN=BST2 PE=4 SV=1;sp|Q10589|BST2_HUMAN Bone marrow	3	1	1	0	0	0	1	0	0	0	0	0	0	0	0	1	0	0	0	0	0	6.9	6.9	23.537	216	0	2.1243	0	0	0	6.9	0	0	0	0	0	0	0	0	0	0	0	0	0
258	B4E1B0	cDNA FLJ54318, highly similar to Complement C1r subcomponent		B4E1B0;F5H2D0;Q53HU9;Q53HT9;A8K5J8;A0A3B3ISR2;B4DPQ0;P00736;A0A3B3ITU4;D3DUT5	tr|B4E1B0|B4E1B0_HUMAN cDNA FLJ54318, highly similar to Complement C1r subcomponent OS=Homo sapiens OX=9606 PE=2 SV=1;tr|F5H2D0|F5H2D0_HUMAN Complement C1r subcomponent OS=Homo sapiens OX=9606 GN=C1R PE=1 SV=3;tr|Q53HU9|Q53HU9_HUMAN Complement component 1,	10	2	2	0	0	0	1	0	0	0	2	1	0	0	0	1	0	0	0	2	1	5	5	68.537	599	0	323.31	0	0	0	1	0	0	0	5	4	0	0	0	0	0	0	0	0
405	B4E1I8	cDNA FLJ54228, highly similar to Leucine-rich alpha-2-glycoprotein		B4E1I8;Q68CK4;P02750	tr|B4E1I8|B4E1I8_HUMAN cDNA FLJ54228, highly similar to Leucine-rich alpha-2-glycoprotein OS=Homo sapiens OX=9606 PE=2 SV=1;tr|Q68CK4|Q68CK4_HUMAN Leucine-rich alpha-2-glycoprotein 1 OS=Homo sapiens OX=9606 GN=HMFT1766 PE=2 SV=1;sp|P02750|A2GL_HUMAN Leucin	3	2	2	0	1	1	2	0	0	1	2	2	0	1	1	2	0	0	1	2	2	6.4	6.4	36.494	330	0	8.2471	0	2.4	2.4	6.4	0	0	3.9	6.4	6.4	0	39717000	27391000	13697000	0	0	0	47623000
406	B4E1T4	cDNA FLJ53955, highly similar to Secreted frizzled-related protein 4		B4E1T4;Q6FHJ7	tr|B4E1T4|B4E1T4_HUMAN cDNA FLJ53955, highly similar to Secreted frizzled-related protein 4 OS=Homo sapiens OX=9606 PE=2 SV=1;sp|Q6FHJ7|SFRP4_HUMAN Secreted frizzled-related protein 4 OS=Homo sapiens OX=9606 GN=SFRP4 PE=1 SV=2	2	2	2	2	1	1	2	0	0	2	2	2	2	1	1	2	0	0	2	2	2	8.2	8.2	39.216	343	0	29.856	8.2	5.8	5.8	8.2	0	0	8.2	8.2	8.2	28387000	39028000	31950000	19175000	0	0	20751000	25483000
407	B4E216	cDNA FLJ57339, highly similar to Complement C3		B4E216;V9HWA9;P01024;M0R1Q1;B4DR57	tr|B4E216|B4E216_HUMAN cDNA FLJ57339, highly similar to Complement C3 OS=Homo sapiens OX=9606 PE=2 SV=1;tr|V9HWA9|V9HWA9_HUMAN Epididymis secretory sperm binding protein Li 62p OS=Homo sapiens OX=9606 GN=HEL-S-62p PE=2 SV=1;sp|P01024|CO3_HUMAN Complement C	5	2	2	1	1	2	1	1	1	1	1	1	1	1	2	1	1	1	1	1	1	3.1	3.1	122.59	1098	0	323.31	1.9	1.9	3.1	1.9	1.9	1.9	1.9	1.9	1.9	28996000	106030000	28136000	88612000	38718000	45831000	37924000	105420000
203	B4E278	cDNA FLJ55571, highly similar to Sad1/unc-84 protein-like 1		B4E278;H0Y6N5;H0Y742;A7MCZ7;E9PHI4;A0A146IHP0;A4D2Q0;O94901;Q5S4N2;H7C2K3	tr|B4E278|B4E278_HUMAN cDNA FLJ55571, highly similar to Sad1/unc-84 protein-like 1 OS=Homo sapiens OX=9606 PE=2 SV=1;tr|H0Y6N5|H0Y6N5_HUMAN SUN domain-containing protein 1 (Fragment) OS=Homo sapiens OX=9606 GN=SUN1 PE=1 SV=1;tr|H0Y742|H0Y742_HUMAN SUN doma	10	2	2	0	0	0	2	0	0	0	1	0	0	0	0	2	0	0	0	1	0	3.9	3.9	66.176	583	0	2.8989	0	0	0	3.9	0	0	0	1.7	0	0	0	0	22787000	0	0	0	0
408	B4E282	cDNA FLJ52401, highly similar to Integrin alpha-10		B4E282;O75578	tr|B4E282|B4E282_HUMAN cDNA FLJ52401, highly similar to Integrin alpha-10 OS=Homo sapiens OX=9606 PE=2 SV=1;sp|O75578|ITA10_HUMAN Integrin alpha-10 OS=Homo sapiens OX=9606 GN=ITGA10 PE=2 SV=2	2	1	1	1	1	1	0	0	0	1	1	1	1	1	1	0	0	0	1	1	1	1.2	1.2	113.76	1036	0	84.408	1.2	1.2	1.2	0	0	0	1.2	1.2	1.2	3388400	4964200	5216300	0	0	0	10054000	9916700
172	B4E2U4	cDNA FLJ52115, highly similar to HLA class II histocompatibility antigen, DRalpha chain		B4E2U4;Q59GE3;B0UXD8;A0A1V0E3V4;A0A0G2JMH6;P01903;B4DLJ8;Q30118;B4DVL4;A0A0G2JH46	tr|B4E2U4|B4E2U4_HUMAN cDNA FLJ52115, highly similar to HLA class II histocompatibility antigen, DRalpha chain OS=Homo sapiens OX=9606 PE=2 SV=1;tr|Q59GE3|Q59GE3_HUMAN Major histocompatibility complex, class II, DR alpha variant (Fragment) OS=Homo sapiens	12	3	3	1	0	1	2	0	1	2	1	1	1	0	1	2	0	1	2	1	1	27.3	27.3	18.258	165	0	6.2803	5.5	0	5.5	21.8	0	7.3	12.7	7.3	5.5	11266000	0	15047000	0	0	0	5149500	0
410	B4E367	cDNA FLJ61564, highly similar to Plexin domain-containing protein 2		B4E367;Q6UX71	tr|B4E367|B4E367_HUMAN cDNA FLJ61564, highly similar to Plexin domain-containing protein 2 OS=Homo sapiens OX=9606 PE=2 SV=1;sp|Q6UX71|PXDC2_HUMAN Plexin domain-containing protein 2 OS=Homo sapiens OX=9606 GN=PLXDC2 PE=1 SV=1	2	1	1	0	0	0	0	0	0	1	1	0	0	0	0	0	0	0	1	1	0	5.6	5.6	58.183	515	0	198.45	0	0	0	0	0	0	5.6	5.6	0	0	0	0	0	0	0	12053000	20263000
18	B4E385	cDNA FLJ52846, highly similar to Homo sapiens matrix-remodelling associated 8 (MXRA8), mRNA		B4E385;A0A024R0A0;Q9BRK3	tr|B4E385|B4E385_HUMAN cDNA FLJ52846, highly similar to Homo sapiens matrix-remodelling associated 8 (MXRA8), mRNA OS=Homo sapiens OX=9606 PE=2 SV=1;tr|A0A024R0A0|A0A024R0A0_HUMAN Matrix-remodelling associated 8, isoform CRA_a OS=Homo sapiens OX=9606 GN=MX	3	1	1	0	0	0	1	0	0	0	1	0	0	0	0	1	0	0	0	1	0	5.8	5.8	39.542	359	0	14.53	0	0	0	5.8	0	0	0	5.8	0	0	0	0	31613000	0	0	0	15204000
104	B4E3A7	cDNA FLJ52057, highly similar to Periostin		B4E3A7;B7Z4V4;A0A024RDT5;C0IMJ3;B1ALD9;A0A024RDS2;Q15063	tr|B4E3A7|B4E3A7_HUMAN cDNA FLJ52057, highly similar to Periostin OS=Homo sapiens OX=9606 PE=2 SV=1;tr|B7Z4V4|B7Z4V4_HUMAN cDNA FLJ50589, highly similar to Periostin OS=Homo sapiens OX=9606 PE=2 SV=1;tr|A0A024RDT5|A0A024RDT5_HUMAN Periostin, osteoblast spe	7	1	1	0	0	0	1	1	1	1	1	1	0	0	0	1	1	1	1	1	1	4.5	4.5	30.194	266	0	56.847	0	0	0	4.5	4.5	4.5	4.5	4.5	4.5	0	0	0	449320000	12057000	72561000	339400000	172620000
411	B4E3G9	cDNA FLJ61084, highly similar to Angiopoietin-1		B4E3G9;Q15389	tr|B4E3G9|B4E3G9_HUMAN cDNA FLJ61084, highly similar to Angiopoietin-1 OS=Homo sapiens OX=9606 PE=2 SV=1;sp|Q15389|ANGP1_HUMAN Angiopoietin-1 OS=Homo sapiens OX=9606 GN=ANGPT1 PE=1 SV=2	2	1	1	0	0	0	1	0	0	0	0	0	0	0	0	1	0	0	0	0	0	3.4	3.4	47.313	409	0.0054152	1.2961	0	0	0	3.4	0	0	0	0	0	0	0	0	1764700	0	0	0	0
412	B4E3S3	cDNA FLJ56673, highly similar to Homo sapiens adipocyte-specific adhesion molecule (ASAM), mRNA		B4E3S3;Q9H6B4	tr|B4E3S3|B4E3S3_HUMAN cDNA FLJ56673, highly similar to Homo sapiens adipocyte-specific adhesion molecule (ASAM), mRNA OS=Homo sapiens OX=9606 PE=2 SV=1;sp|Q9H6B4|CLMP_HUMAN CXADR-like membrane protein OS=Homo sapiens OX=9606 GN=CLMP PE=1 SV=1	2	1	1	0	0	0	1	0	1	0	0	1	0	0	0	1	0	1	0	0	1	5.9	5.9	21.068	188	0	78.5	0	0	0	5.9	0	5.9	0	0	5.9	0	0	0	14028000	0	4622800	0	0
182	B5A959	Soluble FGFR1 variant 2	FGFR1	B5A959;A0A0S2Z3P8;A0A0S2Z3P4;D3DSX4;A0A0S2Z3T4;A0A0S2Z3T9;A0A3B3ISD1;A0A0S2Z3Q6;A0A1B0RPQ4;P11362;A0N6Y5;E9PN14;B5A958;Q53G05;C1KBH7;E7EU09	tr|B5A959|B5A959_HUMAN Soluble FGFR1 variant 2 OS=Homo sapiens OX=9606 GN=FGFR1 PE=2 SV=1;tr|A0A0S2Z3P8|A0A0S2Z3P8_HUMAN Fibroblast growth factor receptor 1 isoform 4 OS=Homo sapiens OX=9606 GN=FGFR1 PE=2 SV=1;tr|A0A0S2Z3P4|A0A0S2Z3P4_HUMAN Fibroblast grow	16	2	2	0	0	0	1	1	2	0	0	0	0	0	0	1	1	2	0	0	0	5.3	5.3	35.534	320	0	1.7009	0	0	0	2.5	2.5	5.3	0	0	0	0	0	0	11369000	24910000	12652000	0	0
21	B5MC36	Glutathione hydrolase 1 proenzyme	GGT1	B5MC36;Q6ISU8;A0A0C4DG87;A2VCM7;Q6NZY2;D3DW46;B5MC34;A0A140VJJ9;A0A024R1F4;Q14390;Q9BX51;P19440	tr|B5MC36|B5MC36_HUMAN Glutathione hydrolase 1 proenzyme OS=Homo sapiens OX=9606 GN=GGT1 PE=1 SV=1;tr|Q6ISU8|Q6ISU8_HUMAN GGT1 protein OS=Homo sapiens OX=9606 GN=GGT1 PE=2 SV=1;tr|A0A0C4DG87|A0A0C4DG87_HUMAN Glutathione hydrolase light chain 2 OS=Homo sapi	12	1	1	0	0	0	0	0	0	1	0	0	0	0	0	0	0	0	1	0	0	6.4	6.4	23.577	218	0.0065253	0.71547	0	0	0	0	0	0	6.4	0	0	0	0	0	0	0	0	2921500	0
415	B5MEF5	Sushi, nidogen and EGF-like domain-containing protein 1	SNED1	B5MEF5;Q8TER0	tr|B5MEF5|B5MEF5_HUMAN Sushi, nidogen and EGF-like domain-containing protein 1 OS=Homo sapiens OX=9606 GN=SNED1 PE=1 SV=3;sp|Q8TER0|SNED1_HUMAN Sushi, nidogen and EGF-like domain-containing protein 1 OS=Homo sapiens OX=9606 GN=SNED1 PE=2 SV=2	2	1	1	0	0	0	1	1	1	1	0	1	0	0	0	1	1	1	1	0	1	2.5	2.5	65.223	599	0	25.25	0	0	0	2.5	2.5	2.5	2.5	0	2.5	0	0	0	5658000	7967800	5350100	8275100	0
90	B7Z1D1	Alkaline phosphatase (EC 3.1.3.1)		B7Z1D1;B2R6Q2;A0A024RAG0;P05186;Q9UIL5	tr|B7Z1D1|B7Z1D1_HUMAN Alkaline phosphatase OS=Homo sapiens OX=9606 PE=2 SV=1;tr|B2R6Q2|B2R6Q2_HUMAN Alkaline phosphatase OS=Homo sapiens OX=9606 PE=2 SV=1;tr|A0A024RAG0|A0A024RAG0_HUMAN Alkaline phosphatase OS=Homo sapiens OX=9606 GN=ALPL PE=3 SV=1;sp|P05	6	4	4	0	0	0	3	2	3	3	3	2	0	0	0	3	2	3	3	3	2	11.9	11.9	51.759	472	0	323.31	0	0	0	10.2	7.6	9.3	10.2	10.2	5.5	0	0	0	192180000	239000000	156680000	92246000	146830000
146	B7Z230	Peptidylprolyl isomerase (EC 5.2.1.8)		B7Z230;B3KQQ0;A0A090N8P3;O95302;C9J4P8;B7Z1U8	tr|B7Z230|B7Z230_HUMAN Peptidylprolyl isomerase OS=Homo sapiens OX=9606 PE=2 SV=1;tr|B3KQQ0|B3KQQ0_HUMAN Peptidylprolyl isomerase OS=Homo sapiens OX=9606 PE=2 SV=1;tr|A0A090N8P3|A0A090N8P3_HUMAN Peptidylprolyl isomerase OS=Homo sapiens OX=9606 GN=FKBP9 PE=	8	3	3	1	1	1	2	2	1	1	3	1	1	1	1	2	2	1	1	3	1	13.7	13.7	47.808	432	0	323.31	4.4	4.4	4.4	8.8	8.8	4.4	4.4	13.7	4.4	35221000	17559000	0	157420000	53932000	171910000	70829000	111520000
416	B7Z236	cDNA FLJ54304, highly similar to Cadherin-13		B7Z236;B7Z3H7;P55290;B7Z985;B7Z9B1	tr|B7Z236|B7Z236_HUMAN cDNA FLJ54304, highly similar to Cadherin-13 OS=Homo sapiens OX=9606 PE=2 SV=1;tr|B7Z3H7|B7Z3H7_HUMAN cDNA FLJ50547, highly similar to Cadherin-13 OS=Homo sapiens OX=9606 PE=2 SV=1;sp|P55290|CAD13_HUMAN Cadherin-13 OS=Homo sapiens OX	5	5	5	0	0	0	5	2	3	4	4	4	0	0	0	5	2	3	4	4	4	24.6	24.6	45.189	415	0	323.31	0	0	0	24.6	6.7	12.5	18.1	18.1	18.1	0	0	0	162440000	114220000	30601000	161210000	144440000
418	B7Z3E3	Reticulon		B7Z3E3;B7Z8W8;O95197	tr|B7Z3E3|B7Z3E3_HUMAN Reticulon OS=Homo sapiens OX=9606 PE=2 SV=1;tr|B7Z8W8|B7Z8W8_HUMAN Reticulon OS=Homo sapiens OX=9606 PE=2 SV=1;sp|O95197|RTN3_HUMAN Reticulon-3 OS=Homo sapiens OX=9606 GN=RTN3 PE=1 SV=2	3	1	1	0	0	0	0	0	0	0	1	0	0	0	0	0	0	0	0	1	0	2.1	2.1	100.82	920	0.0064516	0.68445	0	0	0	0	0	0	0	2.1	0	0	0	0	0	0	0	0	5086400
299	B7Z4A4	cDNA FLJ53058, highly similar to Legumain		B7Z4A4;B7Z4S8;Q6I9U9;Q53XC6;A8K669;Q99538;G3V4E4	tr|B7Z4A4|B7Z4A4_HUMAN cDNA FLJ53058, highly similar to Legumain OS=Homo sapiens OX=9606 PE=2 SV=1;tr|B7Z4S8|B7Z4S8_HUMAN cDNA FLJ53066, highly similar to Legumain OS=Homo sapiens OX=9606 PE=2 SV=1;tr|Q6I9U9|Q6I9U9_HUMAN LGMN protein OS=Homo sapiens OX=960	7	2	2	0	0	0	2	1	1	1	2	1	0	0	0	2	1	1	1	2	1	6.3	6.3	45.637	398	0	51.674	0	0	0	6.3	3.5	3.5	3.5	6.3	3.5	0	0	0	35943000	38348000	23240000	10546000	24143000
421	B7Z4C9	cDNA FLJ59717, highly similar to T-brain-1 protein		B7Z4C9;B7Z5X5;Q16650	tr|B7Z4C9|B7Z4C9_HUMAN cDNA FLJ59717, highly similar to T-brain-1 protein OS=Homo sapiens OX=9606 PE=2 SV=1;tr|B7Z5X5|B7Z5X5_HUMAN cDNA FLJ51062, highly similar to T-brain-1 protein OS=Homo sapiens OX=9606 PE=2 SV=1;sp|Q16650|TBR1_HUMAN T-box brain protein	3	1	1	0	0	0	0	0	0	0	1	0	0	0	0	0	0	0	0	1	0	6.8	6.8	29.26	279	0.0036697	1.3767	0	0	0	0	0	0	0	6.8	0	0	0	0	0	0	0	0	0
422	B7Z539	cDNA FLJ56954, highly similar to Inter-alpha-trypsin inhibitor heavy chain H1		B7Z539;B7Z8B6;B7Z549;P19827	tr|B7Z539|B7Z539_HUMAN cDNA FLJ56954, highly similar to Inter-alpha-trypsin inhibitor heavy chain H1 OS=Homo sapiens OX=9606 PE=2 SV=1;tr|B7Z8B6|B7Z8B6_HUMAN cDNA FLJ54395, highly similar to Inter-alpha-trypsin inhibitor heavy chain H1 OS=Homo sapiens OX=9	4	2	2	0	0	0	1	0	1	1	2	2	0	0	0	1	0	1	1	2	2	5.3	5.3	72.119	645	0	12.199	0	0	0	1.4	0	1.4	1.4	5.3	5.3	0	0	0	44122000	0	47757000	30750000	89759000
426	B7Z5I3	cDNA FLJ59593		B7Z5I3;H3BTN6;Q9H6L2	tr|B7Z5I3|B7Z5I3_HUMAN cDNA FLJ59593 OS=Homo sapiens OX=9606 PE=2 SV=1;tr|H3BTN6|H3BTN6_HUMAN Transmembrane protein 231 OS=Homo sapiens OX=9606 GN=TMEM231 PE=1 SV=1;sp|Q9H6L2|TM231_HUMAN Transmembrane protein 231 OS=Homo sapiens OX=9606 GN=TMEM231 PE=1 SV=	3	1	1	0	0	0	1	0	0	0	1	0	0	0	0	1	0	0	0	1	0	10.1	10.1	19.163	169	0	78.021	0	0	0	10.1	0	0	0	10.1	0	0	0	0	9625000	0	0	0	7666400
122	B7Z687	cDNA FLJ59293, highly similar to Roundabout homolog 1 (Fragment)		B7Z687;A0A087WZ85;A0A0A0MSX4;Q1RMC8;A0A087WTM1;Q2M1J3;Q9Y6N7	tr|B7Z687|B7Z687_HUMAN cDNA FLJ59293, highly similar to Roundabout homolog 1 (Fragment) OS=Homo sapiens OX=9606 PE=2 SV=1;tr|A0A087WZ85|A0A087WZ85_HUMAN Roundabout homolog 1 OS=Homo sapiens OX=9606 GN=ROBO1 PE=1 SV=1;tr|A0A0A0MSX4|A0A0A0MSX4_HUMAN Roundabo	7	1	1	0	0	0	1	0	0	0	0	0	0	0	0	1	0	0	0	0	0	0.8	0.8	122.94	1128	1	-2	0	0	0	0.8	0	0	0	0	0	0	0	0	0	0	0	0	0
252	B7Z766	cDNA FLJ54564, highly similar to 150 kDa oxygen-regulated protein (Orp150)		B7Z766;B3KXH0;A0A384P5T6;Q9Y4L1;B7Z602;A0A087X054;B7Z2N4;Q68D25	tr|B7Z766|B7Z766_HUMAN cDNA FLJ54564, highly similar to 150 kDa oxygen-regulated protein (Orp150) OS=Homo sapiens OX=9606 PE=2 SV=1;tr|B3KXH0|B3KXH0_HUMAN cDNA FLJ45395 fis, clone BRHIP3027191, highly similar to 150 kDa oxygen-regulated protein (Orp150) OS	13	6	6	0	2	1	5	0	1	4	5	3	0	2	1	5	0	1	4	5	3	9.3	9.3	94.198	848	0	323.31	0	3.3	2.2	8.3	0	1.3	6.5	8.3	4.6	0	27861000	22569000	60154000	0	0	65750000	101300000
423	B7Z7D2	Lysosomal acid phosphatase (cDNA FLJ51131, highly similar to Lysosomal acid phosphatase)	ACP2	B7Z7D2;E9PQY3;B7Z552;B7Z6L8;P11117;E9PKW9;E9PQW9;B7Z6T8;B7Z6U3;E9PP23;E9PHY0;B7Z4Z2	tr|B7Z7D2|B7Z7D2_HUMAN Lysosomal acid phosphatase OS=Homo sapiens OX=9606 GN=ACP2 PE=1 SV=1;tr|E9PQY3|E9PQY3_HUMAN Lysosomal acid phosphatase OS=Homo sapiens OX=9606 GN=ACP2 PE=1 SV=1;tr|B7Z552|B7Z552_HUMAN cDNA FLJ51033, highly similar to Lysosomal acid p	13	4	4	1	1	1	4	2	2	2	1	2	1	1	1	4	2	2	2	1	2	13.3	13.3	44.511	391	0	18.713	2.3	2.3	2.3	13.3	5.1	5.1	5.1	2.8	5.1	7291800	0	14155000	40148000	38118000	28761000	19139000	12725000
429	B7Z7R8	cDNA FLJ55622, highly similar to Multimerin-1		B7Z7R8;E7EPG1;Q13201	tr|B7Z7R8|B7Z7R8_HUMAN cDNA FLJ55622, highly similar to Multimerin-1 OS=Homo sapiens OX=9606 PE=2 SV=1;tr|E7EPG1|E7EPG1_HUMAN Multimerin-1 OS=Homo sapiens OX=9606 GN=MMRN1 PE=1 SV=1;sp|Q13201|MMRN1_HUMAN Multimerin-1 OS=Homo sapiens OX=9606 GN=MMRN1 PE=1 S	3	1	1	0	0	0	0	0	0	0	1	0	0	0	0	0	0	0	0	1	0	1.1	1.1	110.76	970	0	3.3316	0	0	0	0	0	0	0	1.1	0	0	0	0	0	0	0	0	2172000
430	B7Z8E7	cDNA FLJ55400, highly similar to Protein OS-9		B7Z8E7;Q13438	tr|B7Z8E7|B7Z8E7_HUMAN cDNA FLJ55400, highly similar to Protein OS-9 OS=Homo sapiens OX=9606 PE=2 SV=1;sp|Q13438|OS9_HUMAN Protein OS-9 OS=Homo sapiens OX=9606 GN=OS9 PE=1 SV=1	2	1	1	0	1	0	1	0	0	0	1	1	0	1	0	1	0	0	0	1	1	1.5	1.5	83.568	740	0	38.518	0	1.5	0	1.5	0	0	0	1.5	1.5	0	5652700	0	3462900	0	0	0	0
335	B7Z8Q7	cDNA FLJ53871, highly similar to Inter-alpha-trypsin inhibitor heavy chain H4		B7Z8Q7;Q68DH2;B7Z551;Q59FS1;H7C0L5;B7Z544;B2RMS9;B7ZKJ8;Q14624	tr|B7Z8Q7|B7Z8Q7_HUMAN cDNA FLJ53871, highly similar to Inter-alpha-trypsin inhibitor heavy chain H4 OS=Homo sapiens OX=9606 PE=2 SV=1;tr|Q68DH2|Q68DH2_HUMAN Uncharacterized protein DKFZp686G21125 (Fragment) OS=Homo sapiens OX=9606 GN=DKFZp686G21125 PE=2 S	9	1	1	0	1	0	1	0	0	1	1	1	0	1	0	1	0	0	1	1	1	4.5	4.5	62.161	560	0	323.31	0	4.5	0	4.5	0	0	4.5	4.5	4.5	0	64219000	0	40488000	0	0	62805000	135550000
148	B7Z938	cDNA FLJ61727, highly similar to Laminin alpha-4 chain (Fragment)		B7Z938;Q5D044;H0UI49;A0A0A0MTC7;A0A0A0MQS9;Q16363	tr|B7Z938|B7Z938_HUMAN cDNA FLJ61727, highly similar to Laminin alpha-4 chain (Fragment) OS=Homo sapiens OX=9606 PE=2 SV=1;tr|Q5D044|Q5D044_HUMAN LAMA4 protein OS=Homo sapiens OX=9606 GN=LAMA4 PE=2 SV=1;tr|H0UI49|H0UI49_HUMAN Laminin, alpha 4, isoform CRA_	10	6	6	0	0	0	4	2	2	3	4	1	0	0	0	4	2	2	3	4	1	5.2	5.2	157.47	1413	0	323.31	0	0	0	2.8	1.8	1.8	2.3	3.9	0.8	0	0	0	67955000	62874000	74604000	43923000	75037000
431	B7Z9G1	cDNA, FLJ78825		B7Z9G1;B7Z8N8;Q5SZJ8	tr|B7Z9G1|B7Z9G1_HUMAN cDNA, FLJ78825 OS=Homo sapiens OX=9606 PE=2 SV=1;tr|B7Z8N8|B7Z8N8_HUMAN cDNA FLJ50941 OS=Homo sapiens OX=9606 PE=2 SV=1;sp|Q5SZJ8|BEND6_HUMAN BEN domain-containing protein 6 OS=Homo sapiens OX=9606 GN=BEND6 PE=1 SV=2	3	1	1	0	1	1	1	0	0	0	1	1	0	1	1	1	0	0	0	1	1	9.6	9.6	9.3266	83	0.0051903	1.0177	0	9.6	9.6	9.6	0	0	0	9.6	9.6	0	34011000	32247000	17345000	0	0	0	20632000
323	B7Z9M1	cDNA, FLJ78885, highly similar to Neutral amino acid transporter A		B7Z9M1;B7Z561;Q9P2X2;Q53F03;B2R7N6;P43007	tr|B7Z9M1|B7Z9M1_HUMAN cDNA, FLJ78885, highly similar to Neutral amino acid transporter A OS=Homo sapiens OX=9606 PE=2 SV=1;tr|B7Z561|B7Z561_HUMAN cDNA FLJ53154, highly similar to Neutral amino acid transporter A OS=Homo sapiens OX=9606 PE=2 SV=1;tr|Q9P2X2	6	1	1	0	0	1	0	0	1	1	0	1	0	0	1	0	0	1	1	0	1	3.3	3.3	47.726	452	0	9.1713	0	0	3.3	0	0	3.3	3.3	0	3.3	0	0	0	0	0	3254000	5464000	0
434	B7ZAV4	cDNA, FLJ79318, highly similar to 24-dehydrocholesterol reductase		B7ZAV4	tr|B7ZAV4|B7ZAV4_HUMAN cDNA, FLJ79318, highly similar to 24-dehydrocholesterol reductase OS=Homo sapiens OX=9606 PE=2 SV=1	1	1	1	0	0	0	0	0	0	0	0	1	0	0	0	0	0	0	0	0	1	2.9	2.9	54.723	475	0.0054446	1.3044	0	0	0	0	0	0	0	0	2.9	0	0	0	0	0	0	0	0
261	B7ZKN7	BLM protein	BLM	B7ZKN7;B7Z2X2;H0YNU5;A0A3B3IT82;B2RAN0;P54132	tr|B7ZKN7|B7ZKN7_HUMAN BLM protein OS=Homo sapiens OX=9606 GN=BLM PE=2 SV=1;tr|B7Z2X2|B7Z2X2_HUMAN cDNA FLJ56969, highly similar to Bloom syndrome protein OS=Homo sapiens OX=9606 PE=2 SV=1;tr|H0YNU5|H0YNU5_HUMAN Bloom syndrome protein OS=Homo sapiens OX=96	6	1	1	0	0	0	1	0	0	1	1	1	0	0	0	1	0	0	1	1	1	0.8	0.8	117.06	1042	0.0036496	1.3419	0	0	0	0.8	0	0	0.8	0.8	0.8	0	0	0	47011000	0	0	25149000	54618000
435	B7ZKY6	Membrane metallo-endopeptidase	MME	B7ZKY6;P08473;C9J9X7;C9JR96	tr|B7ZKY6|B7ZKY6_HUMAN Membrane metallo-endopeptidase OS=Homo sapiens OX=9606 GN=MME PE=2 SV=1;sp|P08473|NEP_HUMAN Neprilysin OS=Homo sapiens OX=9606 GN=MME PE=1 SV=2;tr|C9J9X7|C9J9X7_HUMAN Neprilysin (Fragment) OS=Homo sapiens OX=9606 GN=MME PE=1 SV=1;tr|	4	2	2	0	0	0	1	0	0	1	2	0	0	0	0	1	0	0	1	2	0	3.1	3.1	85.512	750	0	3.2126	0	0	0	1.6	0	0	1.6	3.1	0	0	0	0	5705800	0	0	1856500	4890300
312	B7ZL93	GPR107 protein (Fragment)	GPR107	B7ZL93;A8KAM7;G5E994;Q5VW38	tr|B7ZL93|B7ZL93_HUMAN GPR107 protein (Fragment) OS=Homo sapiens OX=9606 GN=GPR107 PE=2 SV=1;tr|A8KAM7|A8KAM7_HUMAN cDNA FLJ75421, highly similar to Homo sapiens lung seven transmembrane receptor 1 (LUSTR1) mRNA OS=Homo sapiens OX=9606 PE=2 SV=1;tr|G5E994|	4	1	1	0	0	0	1	0	0	0	0	0	0	0	0	1	0	0	0	0	0	5.5	5.5	42.273	379	0	6.4185	0	0	0	5.5	0	0	0	0	0	0	0	0	0	0	0	0	0
437	B7ZMJ3	ADAMTSL4 protein	ADAMTSL4	B7ZMJ3;Q6UY14;Q9UFG7;A8KAH2	tr|B7ZMJ3|B7ZMJ3_HUMAN ADAMTSL4 protein OS=Homo sapiens OX=9606 GN=ADAMTSL4 PE=2 SV=1;sp|Q6UY14|ATL4_HUMAN ADAMTS-like protein 4 OS=Homo sapiens OX=9606 GN=ADAMTSL4 PE=1 SV=2;tr|Q9UFG7|Q9UFG7_HUMAN Uncharacterized protein DKFZp434K1772 (Fragment) OS=Homo s	4	2	2	1	1	2	2	0	1	2	2	2	1	1	2	2	0	1	2	2	2	2.2	2.2	112.03	1035	0	158.91	0.9	0.9	2.2	2.2	0	1.4	2.2	2.2	2.2	42679000	71418000	83084000	58916000	0	0	88886000	67212000
440	B8ZZC1	Fibulin-7	FBLN7	B8ZZC1;Q53RD9	tr|B8ZZC1|B8ZZC1_HUMAN Fibulin-7 OS=Homo sapiens OX=9606 GN=FBLN7 PE=1 SV=1;sp|Q53RD9|FBLN7_HUMAN Fibulin-7 OS=Homo sapiens OX=9606 GN=FBLN7 PE=2 SV=1	2	1	1	1	1	1	1	1	1	1	1	1	1	1	1	1	1	1	1	1	1	6.3	6.3	39.38	366	0	75.246	6.3	6.3	6.3	6.3	6.3	6.3	6.3	6.3	6.3	132390000	125630000	142310000	71035000	32974000	47941000	168520000	131760000
220	C1PHC3	CD44 molecule (Fragment)	CD44	C1PHC3;E9PKC6;Q86UZ1;H0YDX6;A0A1Z1VXF2;H0YD13;H0YDW7;H0YCV9;H0Y2P0;H0Y5E4;B4DN59;A8K309;A0A385KNS5;P16070	tr|C1PHC3|C1PHC3_HUMAN CD44 molecule (Fragment) OS=Homo sapiens OX=9606 GN=CD44 PE=4 SV=1;tr|E9PKC6|E9PKC6_HUMAN CD44 antigen OS=Homo sapiens OX=9606 GN=CD44 PE=1 SV=1;tr|Q86UZ1|Q86UZ1_HUMAN CD44 antigen OS=Homo sapiens OX=9606 GN=CD44 PE=1 SV=1;tr|H0YDX6|	14	1	1	0	1	1	1	1	1	1	1	1	0	1	1	1	1	1	1	1	1	31.1	31.1	5.0508	45	0	15.696	0	31.1	31.1	31.1	31.1	31.1	31.1	31.1	31.1	0	22524000	14033000	120960000	111360000	83948000	97647000	234460000
221	C8KHU1	Equilibrative nucleoside transporter 1 (Fragment)	SLC29A1	C8KHU1;A0A2R8Y567;A0A2R8YEH8;A0A2R8Y801;A0A2R8Y854;A0A2R8YFI6;B7Z1J8;A0A2U3TZM5;A0A2U3TZM6;B7Z914;A0A2U3TZJ7;A0A2R8Y6D1;A0A220K8H0;Q99808	tr|C8KHU1|C8KHU1_HUMAN Equilibrative nucleoside transporter 1 (Fragment) OS=Homo sapiens OX=9606 GN=SLC29A1 PE=2 SV=1;tr|A0A2R8Y567|A0A2R8Y567_HUMAN Equilibrative nucleoside transporter 1 (Fragment) OS=Homo sapiens OX=9606 GN=SLC29A1 PE=1 SV=1;tr|A0A2R8YEH	14	1	1	0	0	0	1	1	1	1	1	1	0	0	0	1	1	1	1	1	1	25.8	25.8	7.1762	62	0	323.31	0	0	0	25.8	25.8	25.8	25.8	25.8	25.8	0	0	0	198720000	0	0	106930000	137060000
153	C9IYP2	Phosphatidate phosphatase LPIN1 (Fragment)	LPIN1	C9IYP2;A0A0A0MS66;Q14693	tr|C9IYP2|C9IYP2_HUMAN Phosphatidate phosphatase LPIN1 (Fragment) OS=Homo sapiens OX=9606 GN=LPIN1 PE=1 SV=1;tr|A0A0A0MS66|A0A0A0MS66_HUMAN Phosphatidate phosphatase LPIN1 OS=Homo sapiens OX=9606 GN=LPIN1 PE=1 SV=1;sp|Q14693|LPIN1_HUMAN Phosphatidate phosp	3	1	1	0	0	1	0	0	0	0	0	0	0	0	1	0	0	0	0	0	0	16.7	16.7	10.654	96	0.0064412	0.6788	0	0	16.7	0	0	0	0	0	0	0	0	0	0	0	0	0	0
36	C9J4Y6	Glypican-1 (Fragment)	GPC1	C9J4Y6;H7BZE9;Q53EX3;H7C024;Q59GI7;H7C410;A0A024R4D5;A0A384NPH9;P35052	tr|C9J4Y6|C9J4Y6_HUMAN Glypican-1 (Fragment) OS=Homo sapiens OX=9606 GN=GPC1 PE=1 SV=1;tr|H7BZE9|H7BZE9_HUMAN Glypican-1 (Fragment) OS=Homo sapiens OX=9606 GN=GPC1 PE=1 SV=2;tr|Q53EX3|Q53EX3_HUMAN Glypican 1 variant (Fragment) OS=Homo sapiens OX=9606 PE=2	9	1	1	1	1	1	1	0	0	0	0	0	1	1	1	1	0	0	0	0	0	9.6	9.6	18.085	156	0	3.2756	9.6	9.6	9.6	9.6	0	0	0	0	0	0	5900800	6916500	11492000	0	0	0	0
414	C9J6F5	Vitrin	VIT	C9J6F5;B5MD45;Q6UXI7	tr|C9J6F5|C9J6F5_HUMAN Vitrin OS=Homo sapiens OX=9606 GN=VIT PE=1 SV=1;tr|B5MD45|B5MD45_HUMAN Vitrin OS=Homo sapiens OX=9606 GN=VIT PE=1 SV=1;sp|Q6UXI7|VITRN_HUMAN Vitrin OS=Homo sapiens OX=9606 GN=VIT PE=2 SV=1	3	1	1	1	1	1	1	1	1	0	1	1	1	1	1	1	1	1	0	1	1	3.2	3.2	38.666	347	0	3.3432	3.2	3.2	3.2	3.2	3.2	3.2	0	3.2	3.2	1032800000	653660000	645760000	0	0	312120000	0	102550000
445	C9JA36	Sodium/potassium-transporting ATPase subunit beta-3 (Fragment)	ATP1B3	C9JA36;D3DNF9;P54709	tr|C9JA36|C9JA36_HUMAN Sodium/potassium-transporting ATPase subunit beta-3 (Fragment) OS=Homo sapiens OX=9606 GN=ATP1B3 PE=1 SV=1;tr|D3DNF9|D3DNF9_HUMAN Sodium/potassium-transporting ATPase subunit beta OS=Homo sapiens OX=9606 GN=ATP1B3 PE=3 SV=1;sp|P54709	3	1	1	0	0	0	1	0	0	0	1	1	0	0	0	1	0	0	0	1	1	10.5	10.5	14.968	133	0	7.4134	0	0	0	10.5	0	0	0	10.5	10.5	0	0	0	9585400	0	0	0	6994200
420	C9JGT6	Prenylcysteine oxidase 1 (Fragment)	PCYOX1	C9JGT6;C9JM55;C9K055;F8W8W4;Q584P1;B7Z3Y2;B7Z8A2;Q9UHG3	tr|C9JGT6|C9JGT6_HUMAN Prenylcysteine oxidase 1 (Fragment) OS=Homo sapiens OX=9606 GN=PCYOX1 PE=1 SV=8;tr|C9JM55|C9JM55_HUMAN Prenylcysteine oxidase 1 (Fragment) OS=Homo sapiens OX=9606 GN=PCYOX1 PE=1 SV=1;tr|C9K055|C9K055_HUMAN Prenylcysteine oxidase 1 (F	8	1	1	1	1	1	1	1	1	1	1	1	1	1	1	1	1	1	1	1	1	12.4	12.4	14.874	129	0	12.914	12.4	12.4	12.4	12.4	12.4	12.4	12.4	12.4	12.4	41804000	0	21855000	29769000	0	15005000	47039000	61281000
34	C9JN98	Glia-derived nexin (Fragment)	SERPINE2	C9JN98;B4DMR3;A0A024R498;A0A024R451;P07093	tr|C9JN98|C9JN98_HUMAN Glia-derived nexin (Fragment) OS=Homo sapiens OX=9606 GN=SERPINE2 PE=1 SV=8;tr|B4DMR3|B4DMR3_HUMAN cDNA FLJ51896, highly similar to Glia-derived nexin OS=Homo sapiens OX=9606 PE=2 SV=1;tr|A0A024R498|A0A024R498_HUMAN Serpin peptidase	5	1	1	1	1	1	0	0	0	1	1	1	1	1	1	0	0	0	1	1	1	4.4	4.4	30.439	275	0	16.643	4.4	4.4	4.4	0	0	0	4.4	4.4	4.4	110330000	77109000	60527000	0	0	0	0	20930000
14	C9JNZ3	Butyrophilin subfamily 3 member A3 (Fragment)	BTN3A3	C9JNZ3;A8K4B5;Q53FK5;A0A024R042;A8K6Q7;Q53FI5;B4DQ62;A0A089GIA6;A8K547;E9PRX1;A0A024QZZ1;B2R753;C9JUV8;C9JQT8;C9JZT5;E9PRR1;E9PJE9;C9J877;C9J3Q8;C9JVU4;P78409;P78410;O00481;O00478	tr|C9JNZ3|C9JNZ3_HUMAN Butyrophilin subfamily 3 member A3 (Fragment) OS=Homo sapiens OX=9606 GN=BTN3A3 PE=4 SV=1;tr|A8K4B5|A8K4B5_HUMAN cDNA FLJ75152, highly similar to Homo sapiens butyrophilin, subfamily 3, member A2 (BTN3A2), mRNA OS=Homo sapiens OX=960	24	1	1	0	0	0	1	0	0	1	1	0	0	0	0	1	0	0	1	1	0	11	11	11.191	100	0	2.8193	0	0	0	11	0	0	11	11	0	0	0	0	6833600	0	0	3568800	0
448	C9JSN9	Biotinidase (Fragment)	BTD	C9JSN9;P43251	tr|C9JSN9|C9JSN9_HUMAN Biotinidase (Fragment) OS=Homo sapiens OX=9606 GN=BTD PE=1 SV=1;sp|P43251|BTD_HUMAN Biotinidase OS=Homo sapiens OX=9606 GN=BTD PE=1 SV=2	2	1	1	0	0	0	1	0	0	0	0	0	0	0	0	1	0	0	0	0	0	3.6	3.6	28.585	251	1	-2	0	0	0	3.6	0	0	0	0	0	0	0	0	5893200	0	0	0	0
449	C9JV37	Prothrombin (Fragment)	F2	C9JV37;E9PIT3;P00734	tr|C9JV37|C9JV37_HUMAN Prothrombin (Fragment) OS=Homo sapiens OX=9606 GN=F2 PE=1 SV=1;tr|E9PIT3|E9PIT3_HUMAN Prothrombin OS=Homo sapiens OX=9606 GN=F2 PE=1 SV=1;sp|P00734|THRB_HUMAN Prothrombin OS=Homo sapiens OX=9606 GN=F2 PE=1 SV=2	3	2	2	0	1	0	1	0	0	1	1	1	0	1	0	1	0	0	1	1	1	9.3	9.3	35.931	324	0	48.772	0	7.1	0	7.1	0	0	2.2	7.1	7.1	0	74200000	0	70223000	0	0	0	74742000
432	C9JV77	Alpha-2-HS-glycoprotein	AHSG	C9JV77;B7Z8Q2;P02765;B7Z556	tr|C9JV77|C9JV77_HUMAN Alpha-2-HS-glycoprotein OS=Homo sapiens OX=9606 GN=AHSG PE=1 SV=1;tr|B7Z8Q2|B7Z8Q2_HUMAN cDNA FLJ55606, highly similar to Alpha-2-HS-glycoprotein OS=Homo sapiens OX=9606 PE=2 SV=1;sp|P02765|FETUA_HUMAN Alpha-2-HS-glycoprotein OS=Homo	4	3	3	1	2	1	3	1	3	2	2	2	1	2	1	3	1	3	2	2	2	15.5	15.5	39.411	368	0	323.31	4.1	10.1	4.1	15.5	4.1	15.5	10.1	10.1	10.1	13805000	83857000	50504000	220490000	0	91983000	212820000	154100000
450	C9JVN1	Melanotransferrin (Fragment)	MELTF	C9JVN1;Q53XS6;P08582	tr|C9JVN1|C9JVN1_HUMAN Melanotransferrin (Fragment) OS=Homo sapiens OX=9606 GN=MELTF PE=1 SV=1;tr|Q53XS6|Q53XS6_HUMAN Antigen p97 (Melanoma associated) identified by monoclonal antibodies 133.2 and 96.5 OS=Homo sapiens OX=9606 GN=MFI2 PE=2 SV=1;sp|P08582|T	3	2	2	1	0	0	1	1	2	2	1	0	1	0	0	1	1	2	2	1	0	9.4	9.4	19.309	181	0	1.8404	5	0	0	5	5	9.4	9.4	5	0	1402800000	0	0	411910000	2003300000	734730000	1752700000	2398800000
256	C9JY01	Translocon-associated protein subunit alpha (Fragment)	SSR1	C9JY01;C9JBX5;C9J3L8;C9J5W0;B2R6N9;A0A3B3IRT8;E9PAL7;C9IZQ1;P43307	tr|C9JY01|C9JY01_HUMAN Translocon-associated protein subunit alpha (Fragment) OS=Homo sapiens OX=9606 GN=SSR1 PE=1 SV=1;tr|C9JBX5|C9JBX5_HUMAN Translocon-associated protein subunit alpha OS=Homo sapiens OX=9606 GN=SSR1 PE=1 SV=1;tr|C9J3L8|C9J3L8_HUMAN Tran	9	1	1	0	0	0	1	0	0	0	1	0	0	0	0	1	0	0	0	1	0	20.4	20.4	11.629	103	0	180.03	0	0	0	20.4	0	0	0	20.4	0	0	0	0	0	0	0	0	0
341	C9JYM4	Golgi membrane protein 1 (Fragment)	GOLM1	C9JYM4;B3KNK9;Q8NBJ4	tr|C9JYM4|C9JYM4_HUMAN Golgi membrane protein 1 (Fragment) OS=Homo sapiens OX=9606 GN=GOLM1 PE=1 SV=1;tr|B3KNK9|B3KNK9_HUMAN Epididymis luminal protein 46 OS=Homo sapiens OX=9606 GN=GOLPH2 PE=2 SV=1;sp|Q8NBJ4|GOLM1_HUMAN Golgi membrane protein 1 OS=Homo sa	3	1	1	1	1	1	1	0	1	1	1	1	1	1	1	1	0	1	1	1	1	9.9	9.9	13.713	121	0	44.323	9.9	9.9	9.9	9.9	0	9.9	9.9	9.9	9.9	42327000	37333000	21720000	32232000	0	38879000	46458000	86592000
458	D2Y6X4	NADH dehydrogenase subunit 4 (EC 1.6.5.3) (Fragment)	ND4	D2Y6X4	tr|D2Y6X4|D2Y6X4_HUMAN NADH dehydrogenase subunit 4 (Fragment) OS=Homo sapiens OX=9606 GN=ND4 PE=4 SV=1	1	1	1	0	0	0	0	0	0	0	0	1	0	0	0	0	0	0	0	0	1	35.7	35.7	4.7695	42	1	-2	0	0	0	0	0	0	0	0	35.7	0	0	0	0	0	0	0	0
404	D3DP13	Fibrinogen beta chain, isoform CRA_e	FGB hCG_2026446	D3DP13;B4E1D3;V9HVY1;P02675;D6REL8	tr|D3DP13|D3DP13_HUMAN Fibrinogen beta chain, isoform CRA_e OS=Homo sapiens OX=9606 GN=FGB PE=4 SV=1;tr|B4E1D3|B4E1D3_HUMAN cDNA FLJ53952, highly similar to Fibrinogen beta chain OS=Homo sapiens OX=9606 PE=2 SV=1;tr|V9HVY1|V9HVY1_HUMAN Epididymis secretory	6	14	14	0	0	0	14	1	3	1	1	2	0	0	0	14	1	3	1	1	2	52.6	52.6	39.736	344	0	323.31	0	0	0	52.6	5.5	14.5	5.5	5.5	9.3	0	0	0	449700000	98003000	477800000	169630000	93636000
461	D3DTX7	Collagen, type I, alpha 1, isoform CRA_a	COL1A1 hCG_29609	D3DTX7	tr|D3DTX7|D3DTX7_HUMAN Collagen, type I, alpha 1, isoform CRA_a OS=Homo sapiens OX=9606 GN=COL1A1 PE=4 SV=1	1	6	1	0	0	0	3	1	0	1	6	2	0	0	0	1	0	0	0	1	0	9.7	2	84.739	885	0	323.31	0	0	0	5.4	1.7	0	1.7	9.7	2.7	0	0	0	72500000	5069400	0	1689200	146270000
304	D3DVN8	Iduronidase, alpha-L-, isoform CRA_a	IDUA hCG_34451	D3DVN8;D6REB5;Q56A80;D3DVN7;A8K701;P35475	tr|D3DVN8|D3DVN8_HUMAN Iduronidase, alpha-L-, isoform CRA_a OS=Homo sapiens OX=9606 GN=IDUA PE=4 SV=1;tr|D6REB5|D6REB5_HUMAN Alpha-L-iduronidase OS=Homo sapiens OX=9606 GN=IDUA PE=1 SV=1;tr|Q56A80|Q56A80_HUMAN IDUA protein (Fragment) OS=Homo sapiens OX=960	6	1	1	1	0	0	1	1	1	0	0	0	1	0	0	1	1	1	0	0	0	4.7	4.7	34.303	316	0	1.7453	4.7	0	0	4.7	4.7	4.7	0	0	0	4222600	0	0	3844800	19682000	7266700	0	0
463	D6RD17	Immunoglobulin J chain (Fragment)	JCHAIN	D6RD17;D6RHJ6;P01591	tr|D6RD17|D6RD17_HUMAN Immunoglobulin J chain (Fragment) OS=Homo sapiens OX=9606 GN=JCHAIN PE=1 SV=8;tr|D6RHJ6|D6RHJ6_HUMAN Immunoglobulin J chain (Fragment) OS=Homo sapiens OX=9606 GN=JCHAIN PE=1 SV=1;sp|P01591|IGJ_HUMAN Immunoglobulin J chain OS=Homo sap	3	1	1	0	0	0	1	0	1	1	1	1	0	0	0	1	0	1	1	1	1	7	7	18.02	157	0	3.8387	0	0	0	7	0	7	7	7	7	0	0	0	70469000	0	0	30810000	30942000
178	D6RD48	Claudin domain-containing protein 1 (Fragment)	CLDND1	D6RD48;D6RAZ7;D6RIU2;D6RDP6;D6RHU6;D6RDY1;D6RA76;D6RC11;D6R9S8;D6RCE6;D6RFX6;D6RDI6;D6RCR8;A0A0R4J2F2;Q9NY35;H0Y8T9	tr|D6RD48|D6RD48_HUMAN Claudin domain-containing protein 1 (Fragment) OS=Homo sapiens OX=9606 GN=CLDND1 PE=1 SV=1;tr|D6RAZ7|D6RAZ7_HUMAN Claudin domain-containing protein 1 OS=Homo sapiens OX=9606 GN=CLDND1 PE=1 SV=1;tr|D6RIU2|D6RIU2_HUMAN Claudin domain-c	16	2	2	0	1	0	2	1	1	1	1	2	0	1	0	2	1	1	1	1	2	23.6	23.6	10.329	89	0	296.82	0	10.1	0	23.6	13.5	13.5	10.1	13.5	23.6	0	5608200	0	10266000	0	0	0	0
464	D6RDV5	Ephrin-A5	EFNA5	D6RDV5;P52803	tr|D6RDV5|D6RDV5_HUMAN Ephrin-A5 OS=Homo sapiens OX=9606 GN=EFNA5 PE=1 SV=1;sp|P52803|EFNA5_HUMAN Ephrin-A5 OS=Homo sapiens OX=9606 GN=EFNA5 PE=1 SV=1	2	1	1	0	1	1	1	0	0	1	0	1	0	1	1	1	0	0	1	0	1	5.5	5.5	23.295	201	0	3.1013	0	5.5	5.5	5.5	0	0	5.5	0	5.5	0	13456000	5017300	4373900	0	0	12227000	0
188	D6REA1	Nucleotide exchange factor SIL1	SIL1	D6REA1;A0A0S2Z6B4;Q9H173	tr|D6REA1|D6REA1_HUMAN Nucleotide exchange factor SIL1 OS=Homo sapiens OX=9606 GN=SIL1 PE=1 SV=1;tr|A0A0S2Z6B4|A0A0S2Z6B4_HUMAN SIL1-like protein endoplasmic reticulum chaperone isoform 1 (Fragment) OS=Homo sapiens OX=9606 GN=SIL1 PE=2 SV=1;sp|Q9H173|SIL1_	3	1	1	1	1	1	1	0	1	1	1	1	1	1	1	1	0	1	1	1	1	2.4	2.4	52.748	468	0	13.494	2.4	2.4	2.4	2.4	0	2.4	2.4	2.4	2.4	18926000	39683000	40729000	6822200	0	4734400	0	0
93	D6RGZ6	Versican core protein (Fragment)	VCAN	D6RGZ6;A0A024RAL1;A0A024RAQ9;Q59FG9;P13611;Q86W61;B7Z638;E9PF17;A0A024RAP3;Q6MZK8	tr|D6RGZ6|D6RGZ6_HUMAN Versican core protein (Fragment) OS=Homo sapiens OX=9606 GN=VCAN PE=1 SV=1;tr|A0A024RAL1|A0A024RAL1_HUMAN Chondroitin sulfate proteoglycan 2 (Versican), isoform CRA_c OS=Homo sapiens OX=9606 GN=CSPG2 PE=4 SV=1;tr|A0A024RAQ9|A0A024RAQ	10	2	2	1	2	2	2	1	1	2	2	2	1	2	2	2	1	1	2	2	2	3.2	3.2	135.74	1240	0	216.26	1	3.2	3.2	3.2	1	1	3.2	3.2	3.2	112750000	133290000	196630000	220620000	115230000	197660000	529600000	318980000
465	D6W633	Protein tyrosine phosphatase, receptor type, S, isoform CRA_a	PTPRS hCG_23499	D6W633;Q13332	tr|D6W633|D6W633_HUMAN Protein tyrosine phosphatase, receptor type, S, isoform CRA_a OS=Homo sapiens OX=9606 GN=PTPRS PE=4 SV=1;sp|Q13332|PTPRS_HUMAN Receptor-type tyrosine-protein phosphatase S OS=Homo sapiens OX=9606 GN=PTPRS PE=1 SV=3	2	2	2	1	1	0	1	0	0	0	1	0	1	1	0	1	0	0	0	1	0	2.5	2.5	143.43	1310	0	8.0844	1.5	1	0	1.5	0	0	0	1.5	0	3029800	0	0	4975600	0	0	0	1856300
249	D9IWP9	Beta-2-glycoprotein I (Fragment)		D9IWP9;A0A384NKM6;P02749;J3QLI0	tr|D9IWP9|D9IWP9_HUMAN Beta-2-glycoprotein I (Fragment) OS=Homo sapiens OX=9606 PE=2 SV=1;tr|A0A384NKM6|A0A384NKM6_HUMAN Apolipoprotein H (Beta-2-glycoprotein I), isoform CRA_a OS=Homo sapiens OX=9606 GN=APOH PE=2 SV=1;sp|P02749|APOH_HUMAN Beta-2-glycoprot	7	3	3	3	3	3	3	2	2	3	3	3	3	3	3	3	2	2	3	3	3	16.3	16.3	36.254	326	0	316.09	16.3	16.3	16.3	16.3	7.4	7.4	16.3	16.3	16.3	312640000	885370000	585100000	1053300000	536370000	678250000	671580000	1538100000
466	D9MWI3	Prostaglandin-endoperoxidase synthase 2 (EC 1.14.99.1) (Fragment)	PTGS2	D9MWI3;Q6ZYK7;Q8IZA9;P35354	tr|D9MWI3|D9MWI3_HUMAN Prostaglandin-endoperoxidase synthase 2 (Fragment) OS=Homo sapiens OX=9606 GN=PTGS2 PE=2 SV=1;tr|Q6ZYK7|Q6ZYK7_HUMAN Prostaglandin G/H synthase 2 OS=Homo sapiens OX=9606 GN=PTGS2 PE=1 SV=1;tr|Q8IZA9|Q8IZA9_HUMAN Cyclooxygenase 2b OS=	4	1	1	0	1	0	0	0	0	0	0	0	0	1	0	0	0	0	0	0	0	30.2	30.2	6.137	53	0	2.5407	0	30.2	0	0	0	0	0	0	0	0	12749000	0	0	0	0	0	0
468	D9ZGF2	Collagen, type VI, alpha 3 (Epididymis secretory sperm binding protein)	COL6A3	D9ZGF2;P12111;E7ENL6;B7ZW00;B4E0A4	tr|D9ZGF2|D9ZGF2_HUMAN Collagen, type VI, alpha 3 OS=Homo sapiens OX=9606 GN=COL6A3 PE=2 SV=1;sp|P12111|CO6A3_HUMAN Collagen alpha-3(VI) chain OS=Homo sapiens OX=9606 GN=COL6A3 PE=1 SV=5;tr|E7ENL6|E7ENL6_HUMAN Collagen alpha-3(VI) chain OS=Homo sapiens OX=	10	48	48	9	9	7	37	13	16	19	35	22	9	9	7	37	13	16	19	35	22	22.8	22.8	343.67	3177	0	323.31	4.4	4.3	3.7	17.5	7	7.9	9.8	17.6	10.7	336970000	257360000	254680000	3587200000	3566800000	2584300000	1776100000	2318900000
442	E1A689	Mutant Apo B 100		E1A689;C0JYY2;P04114;Q59HB3	tr|E1A689|E1A689_HUMAN Mutant Apo B 100 OS=Homo sapiens OX=9606 PE=2 SV=1;tr|C0JYY2|C0JYY2_HUMAN Apolipoprotein B (Including Ag(X) antigen), isoform CRA_a OS=Homo sapiens OX=9606 GN=APOB PE=4 SV=1;sp|P04114|APOB_HUMAN Apolipoprotein B-100 OS=Homo sapiens O	6	5	5	0	1	0	5	2	3	5	5	3	0	1	0	5	2	3	5	5	3	1.7	1.7	489.81	4344	0	323.31	0	0.3	0	1.7	0.7	1	1.7	1.7	1	0	23251000	0	333580000	87949000	103530000	165070000	177220000
187	E5RFZ8	Zinc transporter ZIP14 (Fragment)	SLC39A14	E5RFZ8;E5RGA7;E5RJ40;E5RJG5;E5RIP4;A0A0S2Z5C8;A0A0S2Z5B1;A0A0S2Z5Z7;A0A0S2Z534;Q15043	tr|E5RFZ8|E5RFZ8_HUMAN Zinc transporter ZIP14 (Fragment) OS=Homo sapiens OX=9606 GN=SLC39A14 PE=1 SV=1;tr|E5RGA7|E5RGA7_HUMAN Zinc transporter ZIP14 (Fragment) OS=Homo sapiens OX=9606 GN=SLC39A14 PE=1 SV=1;tr|E5RJ40|E5RJ40_HUMAN Zinc transporter ZIP14 (Fra	10	1	1	1	1	1	1	1	1	1	1	1	1	1	1	1	1	1	1	1	1	12.4	12.4	9.632	89	0	200.14	12.4	12.4	12.4	12.4	12.4	12.4	12.4	12.4	12.4	0	26262000	37570000	68078000	226160000	86558000	0	0
469	E5RIA2	Ectonucleotide pyrophosphatase/phosphodiesterase family member 2	ENPP2	E5RIA2;E7EUF1;Q13822	tr|E5RIA2|E5RIA2_HUMAN Ectonucleotide pyrophosphatase/phosphodiesterase family member 2 OS=Homo sapiens OX=9606 GN=ENPP2 PE=1 SV=1;tr|E7EUF1|E7EUF1_HUMAN Ectonucleotide pyrophosphatase/phosphodiesterase family member 2 OS=Homo sapiens OX=9606 GN=ENPP2 PE=1	3	1	1	0	1	0	1	1	1	1	0	1	0	1	0	1	1	1	1	0	1	1.8	1.8	57.724	498	0.0054054	1.2865	0	1.8	0	1.8	1.8	1.8	1.8	0	1.8	0	7788800	0	9756400	12975000	24930000	0	0
82	E5RJA8	Carboxypeptidase Q (Fragment)	CPQ	E5RJA8;B4DJC2;A0A024R9B8;Q9Y646	tr|E5RJA8|E5RJA8_HUMAN Carboxypeptidase Q (Fragment) OS=Homo sapiens OX=9606 GN=CPQ PE=1 SV=1;tr|B4DJC2|B4DJC2_HUMAN cDNA FLJ51665, highly similar to Homo sapiens plasma glutamate carboxypeptidase (PGCP), mRNA OS=Homo sapiens OX=9606 PE=2 SV=1;tr|A0A024R9B	4	1	1	1	1	1	0	0	0	1	0	0	1	1	1	0	0	0	1	0	0	7	7	20.705	186	0	14.781	7	7	7	0	0	0	7	0	0	37215000	27498000	0	0	0	0	0	0
425	E7EQ29	Beta-galactosidase	GLB1	E7EQ29;B7Z5H9;Q53H18;Q53G40;B7Z6Q5;P16278	tr|E7EQ29|E7EQ29_HUMAN Beta-galactosidase OS=Homo sapiens OX=9606 GN=GLB1 PE=1 SV=1;tr|B7Z5H9|B7Z5H9_HUMAN cDNA FLJ53291, highly similar to Beta-galactosidase-related protein OS=Homo sapiens OX=9606 PE=2 SV=1;tr|Q53H18|Q53H18_HUMAN Beta-galactosidase (Frag	6	1	1	0	0	0	1	1	0	0	0	0	0	0	0	1	1	0	0	0	0	2	2	60.482	546	0.0036969	1.4051	0	0	0	2	2	0	0	0	0	0	0	0	5659600	9652700	0	0	0
471	E7ETN3	Uncharacterized protein		E7ETN3;B4E1Z4;P06681;A0A0G2JL69;Q53GZ8;A0A1U9X8X9;A0A1U9X8X3;A0A1U9X8W4;Q53HP3;Q5JP69;B4DV48;Q7Z685;E9PDZ0;B4DQI1;A0A0G2JIE7;H0Y3H6	tr|E7ETN3|E7ETN3_HUMAN Uncharacterized protein OS=Homo sapiens OX=9606 PE=1 SV=1;tr|B4E1Z4|B4E1Z4_HUMAN cDNA FLJ55673, highly similar to Complement factor B OS=Homo sapiens OX=9606 PE=1 SV=1;sp|P06681|CO2_HUMAN Complement C2 OS=Homo sapiens OX=9606 GN=C2 P	33	6	6	0	4	1	5	1	1	2	4	4	0	4	1	5	1	1	2	4	4	10.4	10.4	124.02	1115	0	259.83	0	6.7	1.9	7.7	1.3	1.3	2.2	5.8	5.8	0	47904000	25039000	83699000	34408000	19023000	49875000	148840000
368	E7ETU9	Procollagen-lysine,2-oxoglutarate 5-dioxygenase 2	PLOD2	E7ETU9;B4DHG3;O00469;C9JXZ0	tr|E7ETU9|E7ETU9_HUMAN Procollagen-lysine,2-oxoglutarate 5-dioxygenase 2 OS=Homo sapiens OX=9606 GN=PLOD2 PE=1 SV=1;tr|B4DHG3|B4DHG3_HUMAN cDNA FLJ55329, highly similar to Procollagen-lysine,2-oxoglutarate5-dioxygenase 2 OS=Homo sapiens OX=9606 PE=2 SV=1;s	6	3	3	2	2	2	3	2	2	2	2	2	2	2	2	3	2	2	2	2	2	3.7	3.7	81.169	703	0	14.248	2.7	2.7	2.7	3.7	2.7	2.7	2.7	2.7	2.7	39910000	29483000	45316000	131660000	91775000	106970000	110260000	152450000
308	E9PBC5	Plasma kallikrein	KLKB1	E9PBC5;B4DMX2;A8K9A9;H0YAC1;P03952	tr|E9PBC5|E9PBC5_HUMAN Plasma kallikrein OS=Homo sapiens OX=9606 GN=KLKB1 PE=1 SV=2;tr|B4DMX2|B4DMX2_HUMAN cDNA FLJ51250, highly similar to Plasma kallikrein OS=Homo sapiens OX=9606 PE=2 SV=1;tr|A8K9A9|A8K9A9_HUMAN cDNA FLJ77744, highly similar to Homo sap	7	3	3	0	0	0	3	0	0	2	2	2	0	0	0	3	0	0	2	2	2	7.6	7.6	57.642	514	0	37.706	0	0	0	7.6	0	0	6	6	6	0	0	0	46061000	0	0	49587000	62880000
332	E9PE72	Ectonucleotide pyrophosphatase/phosphodiesterase family member 1	ENPP1	E9PE72;B2RBY8;P22413	tr|E9PE72|E9PE72_HUMAN Ectonucleotide pyrophosphatase/phosphodiesterase family member 1 OS=Homo sapiens OX=9606 GN=ENPP1 PE=1 SV=1;tr|B2RBY8|B2RBY8_HUMAN cDNA, FLJ95771, highly similar to Homo sapiens ectonucleotide pyrophosphatase/phosphodiesterase 1 (ENP	3	2	2	1	2	1	2	2	2	1	1	1	1	2	1	2	2	2	1	1	1	5	5	42.132	378	0	6.7545	2.9	5	2.9	5	5	5	2.9	2.9	2.9	21434000	17022000	18698000	63832000	43542000	42268000	82409000	74260000
474	E9PGV9	ATP-binding cassette sub-family G member 1	ABCG1	E9PGV9	tr|E9PGV9|E9PGV9_HUMAN ATP-binding cassette sub-family G member 1 OS=Homo sapiens OX=9606 GN=ABCG1 PE=1 SV=1	1	1	1	0	0	1	0	0	0	0	0	0	0	0	1	0	0	0	0	0	0	2.4	2.4	90.862	824	1	-2	0	0	2.4	0	0	0	0	0	0	0	0	17830000	0	0	0	0	0
226	E9PIA8	Palmitoyl-protein thioesterase 1 (Fragment)	PPT1	E9PIA8;A0A286YFE3;A0A2C9F2P4;A0A286YFL8;A0A286YFF7;P50897;E9PSE5;B4DWU3;Q5T0S4	tr|E9PIA8|E9PIA8_HUMAN Palmitoyl-protein thioesterase 1 (Fragment) OS=Homo sapiens OX=9606 GN=PPT1 PE=1 SV=10;tr|A0A286YFE3|A0A286YFE3_HUMAN Palmitoyl-protein thioesterase 1 OS=Homo sapiens OX=9606 GN=PPT1 PE=1 SV=1;tr|A0A2C9F2P4|A0A2C9F2P4_HUMAN Palmitoyl	9	2	2	0	0	0	0	0	0	0	1	1	0	0	0	0	0	0	0	1	1	12.5	12.5	23.254	208	0	136.16	0	0	0	0	0	0	0	9.1	3.4	0	0	0	0	0	0	0	0
394	E9PJ35	Translocon-associated protein subunit beta	SSR2	E9PJ35;Q6MZE4;E9PQI4;B4DUJ9;P43308	tr|E9PJ35|E9PJ35_HUMAN Translocon-associated protein subunit beta OS=Homo sapiens OX=9606 GN=SSR2 PE=1 SV=1;tr|Q6MZE4|Q6MZE4_HUMAN Uncharacterized protein DKFZp686F19123 (Fragment) OS=Homo sapiens OX=9606 GN=DKFZp686F19123 PE=2 SV=1;tr|E9PQI4|E9PQI4_HUMAN	5	1	1	0	1	1	1	1	1	1	1	0	0	1	1	1	1	1	1	1	0	12.8	12.8	14.435	133	0	18.417	0	12.8	12.8	12.8	12.8	12.8	12.8	12.8	0	0	34644000	11694000	44306000	231130000	102600000	0	61364000
100	E9PJC8	Tetraspanin (Fragment)	CD151	E9PJC8;E9PLZ6;E9PRJ3;K4DIB7;K4DIA7;E9PMR4;Q53FU5;A0A024RCB3;P48509	tr|E9PJC8|E9PJC8_HUMAN Tetraspanin (Fragment) OS=Homo sapiens OX=9606 GN=CD151 PE=1 SV=1;tr|E9PLZ6|E9PLZ6_HUMAN Tetraspanin (Fragment) OS=Homo sapiens OX=9606 GN=CD151 PE=1 SV=1;tr|E9PRJ3|E9PRJ3_HUMAN Tetraspanin (Fragment) OS=Homo sapiens OX=9606 GN=CD151	9	1	1	0	0	0	1	0	0	0	0	0	0	0	0	1	0	0	0	0	0	18.8	18.8	19.221	170	0	12.568	0	0	0	18.8	0	0	0	0	0	0	0	0	9519600	0	0	0	0
39	E9PJT6	Solute carrier family 43 member 3 (Fragment)	SLC43A3	E9PJT6;E9PLW1;E9PPE4;E9PLF2;E9PJL3;E9PSH9;E9PMZ1;E9PR64;B4DV87;E9PS74;B0AZP8;A8K2X6;A0A024R4Y2;Q8NBI5	tr|E9PJT6|E9PJT6_HUMAN Solute carrier family 43 member 3 (Fragment) OS=Homo sapiens OX=9606 GN=SLC43A3 PE=1 SV=1;tr|E9PLW1|E9PLW1_HUMAN Solute carrier family 43 member 3 (Fragment) OS=Homo sapiens OX=9606 GN=SLC43A3 PE=1 SV=8;tr|E9PPE4|E9PPE4_HUMAN Solute	14	1	1	0	1	1	1	0	0	0	1	1	0	1	1	1	0	0	0	1	1	25.6	25.6	8.2514	78	0	52.674	0	25.6	25.6	25.6	0	0	0	25.6	25.6	0	5548200	0	8255800	0	0	0	12104000
42	E9PKA3	EGF-containing fibulin-like extracellular matrix protein 2 (Fragment)	EFEMP2	E9PKA3;E9PRU1;Q9H3D5;Q96TF5;Q6FH22;B2RCM5;A0A024R5G1;Q59GI8;O95967	tr|E9PKA3|E9PKA3_HUMAN EGF-containing fibulin-like extracellular matrix protein 2 (Fragment) OS=Homo sapiens OX=9606 GN=EFEMP2 PE=1 SV=1;tr|E9PRU1|E9PRU1_HUMAN EGF-containing fibulin-like extracellular matrix protein 2 OS=Homo sapiens OX=9606 GN=EFEMP2 PE=	9	1	1	0	1	1	1	0	1	1	1	0	0	1	1	1	0	1	1	1	0	6.9	6.9	22.233	202	0	82.645	0	6.9	6.9	6.9	0	6.9	6.9	6.9	0	0	14397000	23636000	32685000	0	20688000	0	20303000
402	E9PME7	SID1 transmembrane family member 2 (Fragment)	SIDT2	E9PME7;E9PPN9;B4DZN7;Q24JR2;F5H8L4;C9JBG5;Q8NBJ9	tr|E9PME7|E9PME7_HUMAN SID1 transmembrane family member 2 (Fragment) OS=Homo sapiens OX=9606 GN=SIDT2 PE=1 SV=8;tr|E9PPN9|E9PPN9_HUMAN SID1 transmembrane family member 2 (Fragment) OS=Homo sapiens OX=9606 GN=SIDT2 PE=1 SV=2;tr|B4DZN7|B4DZN7_HUMAN cDNA FLJ6	7	1	1	0	0	0	1	0	0	0	0	0	0	0	0	1	0	0	0	0	0	18.6	18.6	11.357	97	0	12.29	0	0	0	18.6	0	0	0	0	0	0	0	0	5962100	0	0	0	0
400	E9PNH1	Neutral alpha-glucosidase AB (Fragment)	GANAB	E9PNH1;E9PKU7;B4DZ53	tr|E9PNH1|E9PNH1_HUMAN Neutral alpha-glucosidase AB (Fragment) OS=Homo sapiens OX=9606 GN=GANAB PE=1 SV=1;tr|E9PKU7|E9PKU7_HUMAN Neutral alpha-glucosidase AB OS=Homo sapiens OX=9606 GN=GANAB PE=1 SV=1;tr|B4DZ53|B4DZ53_HUMAN cDNA FLJ59643, highly similar to	3	1	1	1	1	1	1	0	0	0	0	0	1	1	1	1	0	0	0	0	0	9.2	9.2	13.163	119	0	3.3239	9.2	9.2	9.2	9.2	0	0	0	0	0	6133600	0	8219800	4241100	0	0	0	0
305	E9PNW2	Transmembrane 9 superfamily member (Fragment)	TM9SF1	E9PNW2;E9PJC4;E9PQY7;E9PS99;E9PL78;E9PJM1;G3V1B9;E9PMQ9;A8K7U5;E9PSI1;B7Z6C9;O15321	tr|E9PNW2|E9PNW2_HUMAN Transmembrane 9 superfamily member (Fragment) OS=Homo sapiens OX=9606 GN=TM9SF1 PE=3 SV=8;tr|E9PJC4|E9PJC4_HUMAN Transmembrane 9 superfamily member (Fragment) OS=Homo sapiens OX=9606 GN=TM9SF1 PE=3 SV=1;tr|E9PQY7|E9PQY7_HUMAN Transme	12	1	1	0	0	0	1	0	0	1	0	0	0	0	0	1	0	0	1	0	0	4.3	4.3	24.131	207	1	-2	0	0	0	4.3	0	0	4.3	0	0	0	0	0	4332900	0	0	0	0
239	E9PNW4	UPAR/Ly6 domain-containing protein		E9PNW4;E9PI80;A0A2U3TZL5;Q6FHM9;E9PR17;P13987	tr|E9PNW4|E9PNW4_HUMAN Uncharacterized protein OS=Homo sapiens OX=9606 PE=1 SV=1;tr|E9PI80|E9PI80_HUMAN CD59 glycoprotein OS=Homo sapiens OX=9606 GN=CD59 PE=1 SV=1;tr|A0A2U3TZL5|A0A2U3TZL5_HUMAN CD59 glycoprotein (Fragment) OS=Homo sapiens OX=9606 GN=CD59	6	1	1	1	1	1	1	0	1	1	1	1	1	1	1	1	0	1	1	1	1	14.8	14.8	11.985	108	0	87.189	14.8	14.8	14.8	14.8	0	14.8	14.8	14.8	14.8	0	184070000	200260000	130720000	0	64212000	0	195700000
354	E9PP15	Low-density lipoprotein receptor-related protein 8 (Fragment)	LRP8	E9PP15;B3KU40	tr|E9PP15|E9PP15_HUMAN Low-density lipoprotein receptor-related protein 8 OS=Homo sapiens OX=9606 GN=LRP8 PE=1 SV=1;tr|B3KU40|B3KU40_HUMAN cDNA FLJ39163 fis, clone OCBBF2002615, highly similar to Low-density lipoprotein receptor-related protein 8 OS=Homo s	2	1	1	0	0	0	1	0	0	0	0	0	0	0	0	1	0	0	0	0	0	3.3	3.3	50.913	457	1	-2	0	0	0	3.3	0	0	0	0	0	0	0	0	0	0	0	0	0
121	E9PPH3	Receptor-type tyrosine-protein phosphatase eta (Fragment)	PTPRJ	E9PPH3;Q9NPR5;A0A087WTK0;A0A087WVC6;Q12913	tr|E9PPH3|E9PPH3_HUMAN Receptor-type tyrosine-protein phosphatase eta (Fragment) OS=Homo sapiens OX=9606 GN=PTPRJ PE=1 SV=1;tr|Q9NPR5|Q9NPR5_HUMAN PTPRJ, protein tyrosine phosphatase receptor J, eta (Fragment) OS=Homo sapiens OX=9606 PE=2 SV=1;tr|A0A087WTK	5	1	1	0	0	0	0	0	0	0	1	1	0	0	0	0	0	0	0	1	1	8.3	8.3	13.291	120	0	1.8495	0	0	0	0	0	0	0	8.3	8.3	0	0	0	0	0	0	0	1150900
45	E9PQ34	Serpin H1 (Fragment)	SERPINH1	E9PQ34;E9PJH8;E9PIG2;E9PRS3;Q9NPA9;E9PNX1;E9PK86;E9PMI5;E9PR70;E9PPV6;A8K259;A0A024R5K8;P50454	tr|E9PQ34|E9PQ34_HUMAN Serpin H1 (Fragment) OS=Homo sapiens OX=9606 GN=SERPINH1 PE=1 SV=1;tr|E9PJH8|E9PJH8_HUMAN Serpin H1 (Fragment) OS=Homo sapiens OX=9606 GN=SERPINH1 PE=1 SV=1;tr|E9PIG2|E9PIG2_HUMAN Serpin H1 (Fragment) OS=Homo sapiens OX=9606 GN=SERPI	13	1	1	1	1	1	1	1	1	1	1	1	1	1	1	1	1	1	1	1	1	5.6	5.6	15.301	142	0.0036832	1.3912	5.6	5.6	5.6	5.6	5.6	5.6	5.6	5.6	5.6	77551000	36437000	21593000	547990000	1056100000	666030000	61915000	209140000
475	E9PRZ7	Stromal interaction molecule 1 (Fragment)	STIM1	E9PRZ7;E9PR09;E9PN27;E9PIQ8;V5J3L2;G0XQ39;Q13586	tr|E9PRZ7|E9PRZ7_HUMAN Stromal interaction molecule 1 (Fragment) OS=Homo sapiens OX=9606 GN=STIM1 PE=1 SV=1;tr|E9PR09|E9PR09_HUMAN Stromal interaction molecule 1 (Fragment) OS=Homo sapiens OX=9606 GN=STIM1 PE=1 SV=1;tr|E9PN27|E9PN27_HUMAN Stromal interacti	7	1	1	0	0	0	1	0	1	0	0	0	0	0	0	1	0	1	0	0	0	12.7	12.7	12.853	110	0	6.3817	0	0	0	12.7	0	12.7	0	0	0	0	0	0	9029700	0	9846400	0	0
477	F2YYR6	Vascular cell adhesion molecule 1 (Fragment)	VCAM1	F2YYR6;Q53FL7;P19320	tr|F2YYR6|F2YYR6_HUMAN Vascular cell adhesion molecule 1 (Fragment) OS=Homo sapiens OX=9606 GN=VCAM1 PE=4 SV=1;tr|Q53FL7|Q53FL7_HUMAN Vascular cell adhesion molecule 1 isoform a variant (Fragment) OS=Homo sapiens OX=9606 PE=2 SV=1;sp|P19320|VCAM1_HUMAN Vas	3	1	1	0	0	0	1	0	1	0	0	0	0	0	0	1	0	1	0	0	0	16.7	16.7	19.495	180	0	13.445	0	0	0	16.7	0	16.7	0	0	0	0	0	0	10665000	0	28940000	0	0
424	F5GX75	Vitronectin (Fragment)	VTN	F5GX75;B7Z553;D9ZGG2;P04004	tr|F5GX75|F5GX75_HUMAN Vitronectin (Fragment) OS=Homo sapiens OX=9606 GN=VTN PE=1 SV=2;tr|B7Z553|B7Z553_HUMAN cDNA FLJ51266, highly similar to Vitronectin OS=Homo sapiens OX=9606 PE=2 SV=1;tr|D9ZGG2|D9ZGG2_HUMAN Vitronectin OS=Homo sapiens OX=9606 GN=VTN P	4	1	1	1	1	1	1	1	1	1	1	1	1	1	1	1	1	1	1	1	1	19.5	19.5	13.041	118	0	323.31	19.5	19.5	19.5	19.5	19.5	19.5	19.5	19.5	19.5	385000000	1031300000	316620000	745800000	305250000	589190000	2096800000	846910000
478	F5GXA0	Formylglycine-generating enzyme	SUMF1	F5GXA0;Q8NBK3	tr|F5GXA0|F5GXA0_HUMAN Formylglycine-generating enzyme OS=Homo sapiens OX=9606 GN=SUMF1 PE=1 SV=1;sp|Q8NBK3|SUMF1_HUMAN Formylglycine-generating enzyme OS=Homo sapiens OX=9606 GN=SUMF1 PE=1 SV=3	2	1	1	0	0	0	1	0	1	1	1	1	0	0	0	1	0	1	1	1	1	3.1	3.1	46.834	426	0	7.8515	0	0	0	3.1	0	3.1	3.1	3.1	3.1	0	0	0	4131700	0	6402000	5195500	10937000
170	F5GXS0	Complement C4-B	C4B	F5GXS0;A0A140TA49;A0A140TA44;A0A140TA32;A0A140TA29;A0A0G2JL54;A0A0G2JPR0;P0C0L5;P0C0L4;A0A3B3ISD7;B4DDH0;B4E344;A0A3B3ISA6	tr|F5GXS0|F5GXS0_HUMAN Complement C4-B OS=Homo sapiens OX=9606 GN=C4B PE=1 SV=1;tr|A0A140TA49|A0A140TA49_HUMAN Complement C4-A OS=Homo sapiens OX=9606 GN=C4A PE=1 SV=1;tr|A0A140TA44|A0A140TA44_HUMAN Complement C4-A OS=Homo sapiens OX=9606 GN=C4A PE=1 SV=1;	15	3	3	2	2	2	3	2	2	2	2	2	2	2	2	3	2	2	2	2	2	2.4	2.4	187.67	1698	0	315.33	1.6	1.6	1.6	2.4	1.6	1.6	1.6	1.6	1.6	85981000	172560000	78475000	317830000	244280000	148530000	181230000	209750000
479	F5GYM2	Protein Wnt	WNT5B	F5GYM2;F5H034;F5H364;F5H7Q6;Q59G81;Q9H1J7	tr|F5GYM2|F5GYM2_HUMAN Protein Wnt OS=Homo sapiens OX=9606 GN=WNT5B PE=1 SV=1;tr|F5H034|F5H034_HUMAN Protein Wnt (Fragment) OS=Homo sapiens OX=9606 GN=WNT5B PE=1 SV=1;tr|F5H364|F5H364_HUMAN Protein Wnt (Fragment) OS=Homo sapiens OX=9606 GN=WNT5B PE=1 SV=1;	6	1	1	0	0	0	1	0	0	0	0	0	0	0	0	1	0	0	0	0	0	12.5	12.5	12.51	112	0	107.99	0	0	0	12.5	0	0	0	0	0	0	0	0	9191500	0	0	0	0
94	F5GYV0	Epithelial membrane protein 1 (Fragment)	EMP1	F5GYV0;A0A024RAT0;P54849	tr|F5GYV0|F5GYV0_HUMAN Epithelial membrane protein 1 (Fragment) OS=Homo sapiens OX=9606 GN=EMP1 PE=4 SV=1;tr|A0A024RAT0|A0A024RAT0_HUMAN Epithelial membrane protein 1 OS=Homo sapiens OX=9606 GN=EMP1 PE=3 SV=1;sp|P54849|EMP1_HUMAN Epithelial membrane protei	3	1	1	0	0	0	1	1	0	1	1	1	0	0	0	1	1	0	1	1	1	13.7	13.7	16.337	146	0	223.63	0	0	0	13.7	13.7	0	13.7	13.7	13.7	0	0	0	0	0	0	66442000	64707000
446	F5GZZ9	Scavenger receptor cysteine-rich type 1 protein M130	CD163	F5GZZ9;C9JHR8;Q86VB7;D3DUU0;D3DUU2	tr|F5GZZ9|F5GZZ9_HUMAN Scavenger receptor cysteine-rich type 1 protein M130 OS=Homo sapiens OX=9606 GN=CD163 PE=1 SV=1;tr|C9JHR8|C9JHR8_HUMAN Scavenger receptor cysteine-rich type 1 protein M130 OS=Homo sapiens OX=9606 GN=CD163 PE=1 SV=1;sp|Q86VB7|C163A_HU	7	4	4	0	0	0	4	0	1	0	1	0	0	0	0	4	0	1	0	1	0	5.4	5.4	120.32	1109	0	16.001	0	0	0	5.4	0	1.3	0	1.2	0	0	0	0	27863000	0	0	0	9315800
142	F5H125	Cell adhesion molecule 1 (Fragment)	CADM1	F5H125;H0YG94;A0A087X0T8;A0A4Z1;A0A087X1W8;A0A0A0MTJ8;X5D8W0;X5DQS5;X5DQR8;X5DNF2;X5D7A8;Q9BY67	tr|F5H125|F5H125_HUMAN Cell adhesion molecule 1 (Fragment) OS=Homo sapiens OX=9606 GN=CADM1 PE=1 SV=1;tr|H0YG94|H0YG94_HUMAN Cell adhesion molecule 1 (Fragment) OS=Homo sapiens OX=9606 GN=CADM1 PE=1 SV=8;tr|A0A087X0T8|A0A087X0T8_HUMAN Cell adhesion molecul	12	3	3	0	0	0	2	2	2	2	2	1	0	0	0	2	2	2	2	2	1	23.6	23.6	20.514	182	0	123.54	0	0	0	17	13.7	13.7	13.7	13.7	7.1	0	0	0	111340000	45657000	116210000	71377000	75342000
296	F5H1C0	Microfibrillar-associated protein 5 (Fragment)	MFAP5	F5H1C0;F5H2W4;H0YG03;A8K3H0;Q13361	tr|F5H1C0|F5H1C0_HUMAN Microfibrillar-associated protein 5 (Fragment) OS=Homo sapiens OX=9606 GN=MFAP5 PE=1 SV=1;tr|F5H2W4|F5H2W4_HUMAN Microfibrillar-associated protein 5 OS=Homo sapiens OX=9606 GN=MFAP5 PE=1 SV=1;tr|H0YG03|H0YG03_HUMAN Microfibrillar-ass	5	1	1	0	0	0	1	0	0	1	1	1	0	0	0	1	0	0	1	1	1	11	11	9.8158	91	0	2.1195	0	0	0	11	0	0	11	11	11	0	0	0	115750000	0	0	0	10810000
41	F5H5R4	Mas-related G-protein-coupled receptor member F	MRGPRF	F5H5R4;Q8N2G2;B4DE51;A0A2I4R878;A0A024R5F0;Q96AM1	tr|F5H5R4|F5H5R4_HUMAN Mas-related G-protein-coupled receptor member F OS=Homo sapiens OX=9606 GN=MRGPRF PE=4 SV=1;tr|Q8N2G2|Q8N2G2_HUMAN cDNA PSEC0187 fis, clone HEMBA1000034, highly similar to Rat pot. G protein coupled receptor (RTA) mRNA OS=Homo sapien	6	1	1	0	0	0	1	1	1	1	1	1	0	0	0	1	1	1	1	1	1	12.5	12.5	10.614	104	0	189.54	0	0	0	12.5	12.5	12.5	12.5	12.5	12.5	0	0	0	78220000	42830000	17876000	40261000	64275000
353	F5H627	Tumor necrosis factor receptor superfamily member 3	LTBR	F5H627;F5H6F8;F5H2E7;B3KTD9;P36941	tr|F5H627|F5H627_HUMAN Tumor necrosis factor receptor superfamily member 3 OS=Homo sapiens OX=9606 GN=LTBR PE=1 SV=1;tr|F5H6F8|F5H6F8_HUMAN Tumor necrosis factor receptor superfamily member 3 (Fragment) OS=Homo sapiens OX=9606 GN=LTBR PE=1 SV=8;tr|F5H2E7|F	5	1	1	0	0	0	1	0	0	1	0	1	0	0	0	1	0	0	1	0	1	8.8	8.8	15.718	148	0.0018519	1.4786	0	0	0	8.8	0	0	8.8	0	8.8	0	0	0	3349200	0	0	0	0
395	F6SDV2	Tubulointerstitial nephritis antigen-like (Tubulointerstitial nephritis antigen-like 1, isoform CRA_a)	TINAGL1 hCG_41620	F6SDV2;B4DVG5;Q9GZM7	tr|F6SDV2|F6SDV2_HUMAN Tubulointerstitial nephritis antigen-like 1, isoform CRA_a OS=Homo sapiens OX=9606 GN=TINAGL1 PE=1 SV=1;tr|B4DVG5|B4DVG5_HUMAN cDNA FLJ53214, highly similar to Tubulointerstitial nephritis antigen-like OS=Homo sapiens OX=9606 PE=2 SV	3	1	1	0	0	0	0	0	0	0	1	0	0	0	0	0	0	0	0	1	0	7.5	7.5	40.867	362	0.0049261	0.75365	0	0	0	0	0	0	0	7.5	0	0	0	0	0	0	0	0	0
428	F6SFZ6	P2X purinoceptor 4	P2RX4	F6SFZ6;B7Z6W8;Q99571;B7Z1K8;Q0GM93;H0YF70;F5H1M6;B7Z1M5;F5GZQ9;B7Z4R5	tr|F6SFZ6|F6SFZ6_HUMAN P2X purinoceptor 4 OS=Homo sapiens OX=9606 GN=P2RX4 PE=1 SV=1;tr|B7Z6W8|B7Z6W8_HUMAN P2X purinoceptor OS=Homo sapiens OX=9606 PE=2 SV=1;sp|Q99571|P2RX4_HUMAN P2X purinoceptor 4 OS=Homo sapiens OX=9606 GN=P2RX4 PE=1 SV=2;tr|B7Z1K8|B7Z	10	2	2	0	0	0	2	0	0	0	1	1	0	0	0	2	0	0	0	1	1	5.6	5.6	37.979	341	0.0036563	1.3534	0	0	0	5.6	0	0	0	2.6	2.6	0	0	0	5067600	0	0	0	3078900
96	F8VV56	CD63 antigen	CD63	F8VV56;F8W022;F8VWK8;A0A024RB05;P08962;W6A4U0	tr|F8VV56|F8VV56_HUMAN CD63 antigen OS=Homo sapiens OX=9606 GN=CD63 PE=1 SV=1;tr|F8W022|F8W022_HUMAN Tetraspanin (Fragment) OS=Homo sapiens OX=9606 GN=CD63 PE=1 SV=1;tr|F8VWK8|F8VWK8_HUMAN Tetraspanin (Fragment) OS=Homo sapiens OX=9606 GN=CD63 PE=1 SV=1;tr	6	3	3	3	3	3	3	2	3	3	3	3	3	3	3	3	2	3	3	3	3	29	29	16.021	145	0	323.31	29	29	29	29	15.2	29	29	29	29	291430000	494420000	249060000	331130000	472320000	378440000	629750000	516470000
481	F8W7F7	Transmembrane emp24 domain-containing protein 4	TMED4	F8W7F7;Q7Z7H5	tr|F8W7F7|F8W7F7_HUMAN Transmembrane emp24 domain-containing protein 4 OS=Homo sapiens OX=9606 GN=TMED4 PE=1 SV=1;sp|Q7Z7H5|TMED4_HUMAN Transmembrane emp24 domain-containing protein 4 OS=Homo sapiens OX=9606 GN=TMED4 PE=1 SV=1	2	1	1	1	1	1	1	1	1	1	1	0	1	1	1	1	1	1	1	1	0	11.8	11.8	20.118	178	0	33.907	11.8	11.8	11.8	11.8	11.8	11.8	11.8	11.8	0	45099000	60637000	26776000	37485000	112770000	95608000	70963000	32337000
482	F8WAZ6	Mitochondrial-processing peptidase subunit beta	PMPCB	F8WAZ6	tr|F8WAZ6|F8WAZ6_HUMAN Mitochondrial-processing peptidase subunit beta OS=Homo sapiens OX=9606 GN=PMPCB PE=1 SV=1	1	1	1	1	1	1	1	1	1	1	1	1	1	1	1	1	1	1	1	1	1	4.5	4.5	22.149	202	0.0053191	1.2144	4.5	4.5	4.5	4.5	4.5	4.5	4.5	4.5	4.5	301320000	456310000	386660000	61347000	194680000	136970000	96087000	57783000
388	F8WCU2	Peptidyl-prolyl cis-trans isomerase FKBP7	FKBP7	F8WCU2;F8WBF2;F8WE12;B4DRE2;D3DPF8;Q9Y680	tr|F8WCU2|F8WCU2_HUMAN Peptidyl-prolyl cis-trans isomerase FKBP7 OS=Homo sapiens OX=9606 GN=FKBP7 PE=1 SV=1;tr|F8WBF2|F8WBF2_HUMAN Peptidyl-prolyl cis-trans isomerase FKBP7 OS=Homo sapiens OX=9606 GN=FKBP7 PE=1 SV=1;tr|F8WE12|F8WE12_HUMAN Peptidylprolyl is	6	1	1	1	1	1	1	1	1	1	1	1	1	1	1	1	1	1	1	1	1	16.2	16.2	8.8541	74	0	4.3151	16.2	16.2	16.2	16.2	16.2	16.2	16.2	16.2	16.2	22413000	28961000	19997000	61960000	98239000	67326000	39031000	66548000
210	F8WD96	Cathepsin D	CTSD	F8WD96;C9JH19;H7C469;A0A1B0GW44;A0A1B0GVP3;A0A1B0GV23;A0A1B0GVD5;A0A1B0GWE8;V9HWI3;A0A1B0GU92;A0A1B0GU03;P07339	tr|F8WD96|F8WD96_HUMAN Cathepsin D OS=Homo sapiens OX=9606 GN=CTSD PE=1 SV=1;tr|C9JH19|C9JH19_HUMAN Cathepsin D (Fragment) OS=Homo sapiens OX=9606 GN=CTSD PE=1 SV=1;tr|H7C469|H7C469_HUMAN Uncharacterized protein (Fragment) OS=Homo sapiens OX=9606 PE=1 SV=7	12	1	1	1	1	1	0	0	1	1	1	0	1	1	1	0	0	1	1	1	0	3.6	3.6	30	276	0	1.9033	3.6	3.6	3.6	0	0	3.6	3.6	3.6	0	263440000	92796000	78225000	0	0	200320000	131160000	131220000
73	F8WFC4	Myelin protein zero-like protein 1	MPZL1	F8WFC4;Q9UEL6;A0A024R8Y3;Q9UEL4;Q5U0H8;A8K5D4;O95297	tr|F8WFC4|F8WFC4_HUMAN Myelin protein zero-like protein 1 OS=Homo sapiens OX=9606 GN=MPZL1 PE=1 SV=1;tr|Q9UEL6|Q9UEL6_HUMAN Myelin protein zero-like protein 1 (Fragment) OS=Homo sapiens OX=9606 GN=MPZL1 PE=1 SV=1;tr|A0A024R8Y3|A0A024R8Y3_HUMAN Myelin prote	7	1	1	0	1	0	1	1	1	1	1	1	0	1	0	1	1	1	1	1	1	11.6	11.6	9.8041	95	0	10.441	0	11.6	0	11.6	11.6	11.6	11.6	11.6	11.6	0	12523000	0	29930000	76196000	61778000	56267000	44418000
303	G3V0E5	Transferrin receptor (P90, CD71), isoform CRA_c (Transferrin receptor protein 1)	TFRC hCG_22086	G3V0E5;A8K6Q8;P02786	tr|G3V0E5|G3V0E5_HUMAN Transferrin receptor (P90, CD71), isoform CRA_c OS=Homo sapiens OX=9606 GN=TFRC PE=1 SV=1;tr|A8K6Q8|A8K6Q8_HUMAN cDNA FLJ75881, highly similar to Homo sapiens transferrin receptor (p90, CD71) (TFRC), mRNA OS=Homo sapiens OX=9606 PE=2	3	1	1	0	0	0	1	0	0	1	1	1	0	0	0	1	0	0	1	1	1	2.5	2.5	75.963	679	0	28.127	0	0	0	2.5	0	0	2.5	2.5	2.5	0	0	0	35277000	0	0	9831500	10446000
483	G3V357	Ribonuclease pancreatic	RNASE1	G3V357;W0UV93;P07998	tr|G3V357|G3V357_HUMAN Ribonuclease pancreatic OS=Homo sapiens OX=9606 GN=RNASE1 PE=1 SV=1;tr|W0UV93|W0UV93_HUMAN Ribonuclease A C1 OS=Homo sapiens OX=9606 GN=RAC1 PE=3 SV=1;sp|P07998|RNAS1_HUMAN Ribonuclease pancreatic OS=Homo sapiens OX=9606 GN=RNASE1 PE	3	3	3	3	2	1	1	1	1	1	1	2	3	2	1	1	1	1	1	1	2	36.2	36.2	13.049	116	0	122.36	36.2	30.2	9.5	9.5	9.5	9.5	9.5	9.5	15.5	690110000	512170000	155890000	207380000	607670000	137380000	983600000	389010000
240	G3V4V7	Corticosteroid-binding globulin (Fragment)	SERPINA6	G3V4V7;G3V350;B2R9F2;A0A2Z4LCH4;P08185	tr|G3V4V7|G3V4V7_HUMAN Corticosteroid-binding globulin (Fragment) OS=Homo sapiens OX=9606 GN=SERPINA6 PE=1 SV=1;tr|G3V350|G3V350_HUMAN Corticosteroid-binding globulin OS=Homo sapiens OX=9606 GN=SERPINA6 PE=1 SV=1;tr|B2R9F2|B2R9F2_HUMAN cDNA, FLJ94361, high	5	1	1	0	1	1	1	0	0	0	1	1	0	1	1	1	0	0	0	1	1	10.3	10.3	14.965	136	0	22.075	0	10.3	10.3	10.3	0	0	0	10.3	10.3	0	17420000	18993000	15187000	0	0	0	57300000
485	G3XAI2	Laminin subunit beta-1 (Laminin, beta 1, isoform CRA_a)	LAMB1 hCG_17112	G3XAI2;P07942;Q8TAS6	tr|G3XAI2|G3XAI2_HUMAN Laminin subunit beta-1 OS=Homo sapiens OX=9606 GN=LAMB1 PE=1 SV=1;sp|P07942|LAMB1_HUMAN Laminin subunit beta-1 OS=Homo sapiens OX=9606 GN=LAMB1 PE=1 SV=2;tr|Q8TAS6|Q8TAS6_HUMAN LAMB1 protein (Fragment) OS=Homo sapiens OX=9606 GN=LAMB	4	4	4	0	0	0	4	1	1	1	1	2	0	0	0	4	1	1	1	1	2	3.1	3.1	200.48	1810	0	94.944	0	0	0	3.1	0.7	0.7	0.7	0.7	1.1	0	0	0	117180000	191230000	96781000	20867000	84477000
486	G3XAP6	Cartilage oligomeric matrix protein (Cartilage oligomeric matrix protein, isoform CRA_b)	COMP hCG_37043	G3XAP6;P49747;A8K3I0;B4DN90	tr|G3XAP6|G3XAP6_HUMAN Cartilage oligomeric matrix protein OS=Homo sapiens OX=9606 GN=COMP PE=1 SV=1;sp|P49747|COMP_HUMAN Cartilage oligomeric matrix protein OS=Homo sapiens OX=9606 GN=COMP PE=1 SV=2;tr|A8K3I0|A8K3I0_HUMAN cDNA FLJ78437, highly similar to	5	27	1	4	6	13	9	2	2	13	18	16	0	0	0	0	0	0	1	1	1	56.1	5	79.696	724	0	323.31	11	13.7	25.1	23.9	6.1	6.1	33.7	45.6	40.2	22931000000	58027000000	44029000000	6941000000	1812200000	2977500000	25900000000	19596000000
488	H0Y4I5	Chondroadherin-like protein (Fragment)	CHADL	H0Y4I5;Q6NUI6	tr|H0Y4I5|H0Y4I5_HUMAN Chondroadherin-like protein (Fragment) OS=Homo sapiens OX=9606 GN=CHADL PE=1 SV=1;sp|Q6NUI6|CHADL_HUMAN Chondroadherin-like protein OS=Homo sapiens OX=9606 GN=CHADL PE=1 SV=2	2	1	1	1	1	1	1	0	0	1	1	1	1	1	1	1	0	0	1	1	1	2.5	2.5	73.836	684	0	245.96	2.5	2.5	2.5	2.5	0	0	2.5	2.5	2.5	38596000	23533000	41047000	39421000	0	0	45331000	44362000
489	H0Y512	Adipocyte plasma membrane-associated protein (Fragment)	APMAP	H0Y512;Q9HDC9	tr|H0Y512|H0Y512_HUMAN Adipocyte plasma membrane-associated protein (Fragment) OS=Homo sapiens OX=9606 GN=APMAP PE=1 SV=1;sp|Q9HDC9|APMAP_HUMAN Adipocyte plasma membrane-associated protein OS=Homo sapiens OX=9606 GN=APMAP PE=1 SV=2	2	2	2	1	1	1	2	0	1	1	2	1	1	1	1	2	0	1	1	2	1	7.1	7.1	45.294	409	0	69.041	3.4	3.4	3.4	7.1	0	3.4	3.4	7.1	3.4	13328000	5873700	3767600	15475000	0	10421000	13255000	7242000
490	H0Y7C8	Torsin-1B (Fragment)	TOR1B	H0Y7C8;O14657	tr|H0Y7C8|H0Y7C8_HUMAN Torsin-1B (Fragment) OS=Homo sapiens OX=9606 GN=TOR1B PE=1 SV=1;sp|O14657|TOR1B_HUMAN Torsin-1B OS=Homo sapiens OX=9606 GN=TOR1B PE=1 SV=2	2	1	1	0	0	0	1	0	0	0	0	0	0	0	0	1	0	0	0	0	0	7.8	7.8	15.557	141	0.005059	0.8527	0	0	0	7.8	0	0	0	0	0	0	0	0	1397300	0	0	0	0
331	H0Y7R7	5'-nucleotidase (Fragment)	NT5E	H0Y7R7;Q6NZX3;Q53Z63;B2RBH2;P21589;H0Y3X5	tr|H0Y7R7|H0Y7R7_HUMAN 5-nucleotidase (Fragment) OS=Homo sapiens OX=9606 GN=NT5E PE=1 SV=1;tr|Q6NZX3|Q6NZX3_HUMAN 5-nucleotidase, ecto (CD73) OS=Homo sapiens OX=9606 GN=NT5E PE=2 SV=1;tr|Q53Z63|Q53Z63_HUMAN 5-nucleotidase, ecto (CD73), isoform CRA_a OS=	6	2	2	1	2	1	2	1	2	2	2	2	1	2	1	2	1	2	2	2	2	15.2	15.2	25.636	230	0	161.93	4.8	15.2	10.4	15.2	10.4	15.2	15.2	15.2	15.2	0	175130000	88390000	210160000	175180000	115830000	224920000	188560000
32	H0Y7Y8	AT-rich interactive domain-containing protein 4B (Fragment)	ARID4B	H0Y7Y8;H7C5R6;A0A024R3V1;A0A024R3R1;Q4LE39	tr|H0Y7Y8|H0Y7Y8_HUMAN AT-rich interactive domain-containing protein 4B (Fragment) OS=Homo sapiens OX=9606 GN=ARID4B PE=1 SV=2;tr|H7C5R6|H7C5R6_HUMAN AT-rich interactive domain-containing protein 4B (Fragment) OS=Homo sapiens OX=9606 GN=ARID4B PE=1 SV=1;tr	5	1	1	1	1	1	1	1	1	1	1	1	1	1	1	1	1	1	1	1	1	1.4	1.4	61.372	553	0.0036364	1.323	1.4	1.4	1.4	1.4	1.4	1.4	1.4	1.4	1.4	1180500000	1245300000	1157700000	456200000	1409800000	333510000	347340000	207090000
253	H0Y8G4	ADP-ribosyl cyclase/cyclic ADP-ribose hydrolase 2 (Fragment)	BST1	H0Y8G4;H0Y984;A6NC48;A0A386NEX7;Q10588	tr|H0Y8G4|H0Y8G4_HUMAN ADP-ribosyl cyclase/cyclic ADP-ribose hydrolase 2 (Fragment) OS=Homo sapiens OX=9606 GN=BST1 PE=1 SV=1;tr|H0Y984|H0Y984_HUMAN ADP-ribosyl cyclase/cyclic ADP-ribose hydrolase 2 (Fragment) OS=Homo sapiens OX=9606 GN=BST1 PE=1 SV=1;tr|A	5	1	1	0	0	0	1	0	0	0	0	1	0	0	0	1	0	0	0	0	1	14.2	14.2	17.563	155	0	11.56	0	0	0	14.2	0	0	0	0	14.2	0	0	0	5395400	0	0	0	0
389	H0Y928	Thioredoxin domain-containing protein 15 (Fragment)	TXNDC15	H0Y928;B4DS52;H0Y997;Q7Z345;Q96J42	tr|H0Y928|H0Y928_HUMAN Thioredoxin domain-containing protein 15 (Fragment) OS=Homo sapiens OX=9606 GN=TXNDC15 PE=1 SV=1;tr|B4DS52|B4DS52_HUMAN cDNA FLJ56237, highly similar to Homo sapiens thioredoxin domain containing 15 (TXNDC15), mRNA OS=Homo sapiens OX	5	1	1	0	0	0	0	0	0	0	1	0	0	0	0	0	0	0	0	1	0	10.4	10.4	12.93	115	0.005291	1.1934	0	0	0	0	0	0	0	10.4	0	0	0	0	0	0	0	0	3115900
13	H0YAF9	Follistatin (Fragment)	FST	H0YAF9;H0YA75;Q6FHE1;A0A024QZU6;P19883	tr|H0YAF9|H0YAF9_HUMAN Follistatin (Fragment) OS=Homo sapiens OX=9606 GN=FST PE=1 SV=1;tr|H0YA75|H0YA75_HUMAN Follistatin (Fragment) OS=Homo sapiens OX=9606 GN=FST PE=1 SV=1;tr|Q6FHE1|Q6FHE1_HUMAN FST protein OS=Homo sapiens OX=9606 GN=FST PE=2 SV=1;tr|A0A	5	1	1	0	0	0	1	0	0	0	0	0	0	0	0	1	0	0	0	0	0	19.6	19.6	10.704	102	0	17.036	0	0	0	19.6	0	0	0	0	0	0	0	0	9518500	0	0	0	0
491	H0YC24	Anthrax toxin receptor 1 (Fragment)	ANTXR1	H0YC24;Q53FL1;Q508I8;Q508I6;Q508I5;Q508I7;Q9H6X2	tr|H0YC24|H0YC24_HUMAN Anthrax toxin receptor 1 (Fragment) OS=Homo sapiens OX=9606 GN=ANTXR1 PE=1 SV=1;tr|Q53FL1|Q53FL1_HUMAN Tumor endothelial marker 8 isoform 3 variant (Fragment) OS=Homo sapiens OX=9606 PE=2 SV=1;tr|Q508I8|Q508I8_HUMAN Anthrax toxin rec	7	1	1	0	0	0	1	0	1	0	1	0	0	0	0	1	0	1	0	1	0	5	5	19.738	179	0	11.084	0	0	0	5	0	5	0	5	0	0	0	0	20329000	0	6182000	0	0
492	H0YD57	CD82 antigen (Fragment)	CD82	H0YD57;Q6LET0;P27701	tr|H0YD57|H0YD57_HUMAN CD82 antigen (Fragment) OS=Homo sapiens OX=9606 GN=CD82 PE=1 SV=1;tr|Q6LET0|Q6LET0_HUMAN Tetraspanin (Fragment) OS=Homo sapiens OX=9606 GN=KAI1 PE=2 SV=1;sp|P27701|CD82_HUMAN CD82 antigen OS=Homo sapiens OX=9606 GN=CD82 PE=1 SV=1	3	2	2	0	0	0	1	0	0	0	2	0	0	0	0	1	0	0	0	2	0	17.5	17.5	6.4922	57	0.005386	1.266	0	0	0	15.8	0	0	0	17.5	0	0	0	0	5454500	0	0	0	3948400
43	H0YD65	Cathepsin F (Fragment)	CTSF	H0YD65;A0A024R5G9;Q9UBX1;Q6FHS1	tr|H0YD65|H0YD65_HUMAN Cathepsin F (Fragment) OS=Homo sapiens OX=9606 GN=CTSF PE=1 SV=8;tr|A0A024R5G9|A0A024R5G9_HUMAN Cathepsin F, isoform CRA_a OS=Homo sapiens OX=9606 GN=CTSF PE=3 SV=1;sp|Q9UBX1|CATF_HUMAN Cathepsin F OS=Homo sapiens OX=9606 GN=CTSF PE=	5	3	3	2	2	2	2	1	1	1	2	3	2	2	2	2	1	1	1	2	3	17.4	17.4	31.695	282	0	272.1	8.2	8.2	8.2	8.2	2.8	2.8	5.3	8.2	17.4	167630000	106320000	163580000	19411000	45787000	47191000	0	26975000
476	H0YE75	Latent-transforming growth factor beta-binding protein 3 (Fragment)	LTBP3	H0YE75;E9PRF2;H0YC99;Q9NS15	tr|H0YE75|H0YE75_HUMAN Latent-transforming growth factor beta-binding protein 3 (Fragment) OS=Homo sapiens OX=9606 GN=LTBP3 PE=1 SV=1;tr|E9PRF2|E9PRF2_HUMAN Latent-transforming growth factor beta-binding protein 3 OS=Homo sapiens OX=9606 GN=LTBP3 PE=1 SV=1	4	1	1	0	0	0	0	0	0	1	0	0	0	0	0	0	0	0	1	0	0	40.6	40.6	7.0389	69	0.0052083	1.0279	0	0	0	0	0	0	40.6	0	0	0	0	0	0	0	0	0	0
271	H0YEA7	N-acetylglucosamine-1-phosphotransferase subunit gamma (Fragment)	GNPTG	H0YEA7;A2VDJ4;Q96RZ2;Q9UJJ9	tr|H0YEA7|H0YEA7_HUMAN N-acetylglucosamine-1-phosphotransferase subunit gamma (Fragment) OS=Homo sapiens OX=9606 GN=GNPTG PE=1 SV=8;tr|A2VDJ4|A2VDJ4_HUMAN GNPTG protein (Fragment) OS=Homo sapiens OX=9606 GN=GNPTG PE=2 SV=1;tr|Q96RZ2|Q96RZ2_HUMAN N-acetylgl	4	1	1	1	1	1	0	0	0	0	0	0	1	1	1	0	0	0	0	0	0	9.2	9.2	20.149	184	0	8.8177	9.2	9.2	9.2	0	0	0	0	0	0	13599000	11623000	13894000	0	0	0	0	0
97	H0YFA9	N-acetylglucosamine-6-sulfatase (Fragment)	GNS	H0YFA9;B4DTT0;Q7Z3X3;H7C3P4;A8K6V6;A0A024RBC5;F6S8M0;B4E284;P15586;F5H4C6	tr|H0YFA9|H0YFA9_HUMAN N-acetylglucosamine-6-sulfatase (Fragment) OS=Homo sapiens OX=9606 GN=GNS PE=1 SV=1;tr|B4DTT0|B4DTT0_HUMAN N-acetylglucosamine-6-sulfatase OS=Homo sapiens OX=9606 PE=2 SV=1;tr|Q7Z3X3|Q7Z3X3_HUMAN N-acetylglucosamine-6-sulfatase OS=Ho	10	2	2	0	0	0	2	1	1	0	0	0	0	0	0	2	1	1	0	0	0	8.9	8.9	34.608	303	0	2.207	0	0	0	8.9	3.6	3.6	0	0	0	0	0	0	3231400	0	8648000	0	0
320	H0YGE9	Cation-dependent mannose-6-phosphate receptor (Fragment)	M6PR	H0YGE9;F5GXU0;F5H883;F5GX30;Q6I9U3;Q53GY9;B2R6S2;P20645	tr|H0YGE9|H0YGE9_HUMAN Cation-dependent mannose-6-phosphate receptor (Fragment) OS=Homo sapiens OX=9606 GN=M6PR PE=1 SV=1;tr|F5GXU0|F5GXU0_HUMAN Cation-dependent mannose-6-phosphate receptor (Fragment) OS=Homo sapiens OX=9606 GN=M6PR PE=1 SV=1;tr|F5H883|F5	8	1	1	0	0	0	1	0	1	1	1	0	0	0	0	1	0	1	1	1	0	15.4	15.4	11.539	104	0	99.021	0	0	0	15.4	0	15.4	15.4	15.4	0	0	0	0	33171000	0	0	46178000	87842000
436	H0YJI6	Thioredoxin domain-containing protein 16 (Fragment)	TXNDC16	H0YJI6;B7ZME4;Q9P2K2	tr|H0YJI6|H0YJI6_HUMAN Thioredoxin domain-containing protein 16 (Fragment) OS=Homo sapiens OX=9606 GN=TXNDC16 PE=1 SV=1;tr|B7ZME4|B7ZME4_HUMAN TXNDC16 protein OS=Homo sapiens OX=9606 GN=TXNDC16 PE=2 SV=1;sp|Q9P2K2|TXD16_HUMAN Thioredoxin domain-containing	3	1	1	1	0	1	0	0	0	0	0	0	1	0	1	0	0	0	0	0	0	9.3	9.3	12.02	107	0.0065041	0.71122	9.3	0	9.3	0	0	0	0	0	0	0	0	3707200	0	0	0	0	0
365	H0YKJ9	Tetraspanin-3	TSPAN3	H0YKJ9;B4DEK8;O60637	tr|H0YKJ9|H0YKJ9_HUMAN Tetraspanin-3 OS=Homo sapiens OX=9606 GN=TSPAN3 PE=1 SV=1;tr|B4DEK8|B4DEK8_HUMAN Tetraspanin OS=Homo sapiens OX=9606 PE=2 SV=1;sp|O60637|TSN3_HUMAN Tetraspanin-3 OS=Homo sapiens OX=9606 GN=TSPAN3 PE=2 SV=1	3	2	2	1	1	2	0	1	1	0	1	2	1	1	2	0	1	1	0	1	2	23.8	23.8	18.349	164	0	24.36	7.3	7.3	23.8	0	7.3	7.3	0	7.3	23.8	10517000	20497000	30126000	0	33895000	16072000	0	32858000
493	H0YNA7	Signal peptide peptidase-like 2A (Fragment)	SPPL2A	H0YNA7;Q8TCT8	tr|H0YNA7|H0YNA7_HUMAN Signal peptide peptidase-like 2A (Fragment) OS=Homo sapiens OX=9606 GN=SPPL2A PE=1 SV=8;sp|Q8TCT8|SPP2A_HUMAN Signal peptide peptidase-like 2A OS=Homo sapiens OX=9606 GN=SPPL2A PE=1 SV=2	2	1	1	0	0	0	1	0	0	0	1	1	0	0	0	1	0	0	0	1	1	8.7	8.7	16.432	149	0	6.6132	0	0	0	8.7	0	0	0	8.7	8.7	0	0	0	12382000	0	0	0	38429000
385	H3BQ21	Signal-regulatory protein beta-1 (Fragment)	SIRPB1	H3BQ21;B4DP97;D3DVW9;Q5TFQ8;P78324;H3BSK5	tr|H3BQ21|H3BQ21_HUMAN Signal-regulatory protein beta-1 (Fragment) OS=Homo sapiens OX=9606 GN=SIRPB1 PE=1 SV=1;tr|B4DP97|B4DP97_HUMAN cDNA FLJ52934, highly similar to Tyrosine-protein phosphatase non-receptortype substrate 1 OS=Homo sapiens OX=9606 PE=2 SV	6	2	2	0	2	0	2	1	1	1	1	1	0	2	0	2	1	1	1	1	1	9.3	9.3	26.012	236	0	114.11	0	9.3	0	9.3	5.1	5.1	5.1	5.1	5.1	0	8825300	0	7856400	9121400	5910500	0	10602000
377	H3BUU9	Cadherin-11	CDH11	H3BUU9;B4DMA7;Q96CZ9;Q59EQ1;P55287	tr|H3BUU9|H3BUU9_HUMAN Cadherin-11 OS=Homo sapiens OX=9606 GN=CDH11 PE=1 SV=1;tr|B4DMA7|B4DMA7_HUMAN cDNA FLJ58514, highly similar to Cadherin-11 OS=Homo sapiens OX=9606 PE=2 SV=1;tr|Q96CZ9|Q96CZ9_HUMAN Cadherin 11, type 2, OB-cadherin (Osteoblast) OS=Homo	5	1	1	0	0	0	1	0	0	0	1	0	0	0	0	1	0	0	0	1	0	2.7	2.7	73.792	670	0	4.2484	0	0	0	2.7	0	0	0	2.7	0	0	0	0	9363200	0	0	0	0
427	H7BXL0	Fibulin-2 (Fragment)	FBLN2	H7BXL0;B7Z6T9;Q9Y3V7;Q86V58;B7Z9B8;P98095	tr|H7BXL0|H7BXL0_HUMAN Fibulin-2 (Fragment) OS=Homo sapiens OX=9606 GN=FBLN2 PE=1 SV=1;tr|B7Z6T9|B7Z6T9_HUMAN cDNA FLJ50237, highly similar to Homo sapiens fibulin 2 (FBLN2), transcript variant 1, mRNA OS=Homo sapiens OX=9606 PE=2 SV=1;tr|Q9Y3V7|Q9Y3V7_HUM	6	1	1	0	0	0	1	0	0	1	1	0	0	0	0	1	0	0	1	1	0	23.9	23.9	11.674	109	0	252.16	0	0	0	23.9	0	0	23.9	23.9	0	0	0	0	37315000	0	0	147120000	56393000
350	H7BZJ3	Protein disulfide-isomerase A3 (Fragment)	PDIA3	H7BZJ3;B3KQT9;B3KQT2;V9HVY3;P30101	tr|H7BZJ3|H7BZJ3_HUMAN Protein disulfide-isomerase A3 (Fragment) OS=Homo sapiens OX=9606 GN=PDIA3 PE=1 SV=1;tr|B3KQT9|B3KQT9_HUMAN Protein disulfide-isomerase OS=Homo sapiens OX=9606 PE=2 SV=1;tr|B3KQT2|B3KQT2_HUMAN Protein disulfide-isomerase OS=Homo sapi	5	1	1	0	0	0	1	0	0	1	0	0	0	0	0	1	0	0	1	0	0	9.8	9.8	13.519	123	0	3.4613	0	0	0	9.8	0	0	9.8	0	0	0	0	0	2177900	0	0	1608400	0
495	H7C0G1	Transmembrane protein 245 (Fragment)	TMEM245	H7C0G1;Q9H330	tr|H7C0G1|H7C0G1_HUMAN Transmembrane protein 245 (Fragment) OS=Homo sapiens OX=9606 GN=TMEM245 PE=1 SV=1;sp|Q9H330|TM245_HUMAN Transmembrane protein 245 OS=Homo sapiens OX=9606 GN=TMEM245 PE=1 SV=3	2	1	1	1	1	1	1	0	0	1	1	1	1	1	1	1	0	0	1	1	1	1.9	1.9	52.72	472	0	1.5766	1.9	1.9	1.9	1.9	0	0	1.9	1.9	1.9	3390600	3257000	2839900	8200100	0	0	3103600	4753800
281	H7C0M6	Sialoadhesin (Fragment)	SIGLEC1	H7C0M6;A5D8Z7;Q9BZZ2	tr|H7C0M6|H7C0M6_HUMAN Sialoadhesin (Fragment) OS=Homo sapiens OX=9606 GN=SIGLEC1 PE=1 SV=1;tr|A5D8Z7|A5D8Z7_HUMAN SIGLEC1 protein (Fragment) OS=Homo sapiens OX=9606 GN=SIGLEC1 PE=2 SV=1;sp|Q9BZZ2|SN_HUMAN Sialoadhesin OS=Homo sapiens OX=9606 GN=SIGLEC1 PE	3	2	2	0	0	0	2	0	1	0	0	0	0	0	0	2	0	1	0	0	0	7.1	7.1	48.394	463	0	51.074	0	0	0	7.1	0	2.8	0	0	0	0	0	0	8078800	0	7578400	0	0
85	H7C0X5	Probable serine carboxypeptidase CPVL (Fragment)	CPVL	H7C0X5;O75225;B3KW79;A0A024RA40;Q9H3G5	tr|H7C0X5|H7C0X5_HUMAN Probable serine carboxypeptidase CPVL (Fragment) OS=Homo sapiens OX=9606 GN=CPVL PE=1 SV=1;tr|O75225|O75225_HUMAN Carboxypeptidase (Fragment) OS=Homo sapiens OX=9606 GN=CPVL PE=3 SV=1;tr|B3KW79|B3KW79_HUMAN Carboxypeptidase OS=Homo s	5	1	1	0	0	0	1	0	0	0	0	0	0	0	0	1	0	0	0	0	0	10	10	21.076	180	0	5.6779	0	0	0	10	0	0	0	0	0	0	0	0	8162500	0	0	0	0
441	H7C248	Lysyl oxidase homolog 3 (Fragment)	LOXL3	H7C248;Q53TY1;B9A025;E7END4;P58215	tr|H7C248|H7C248_HUMAN Lysyl oxidase homolog 3 (Fragment) OS=Homo sapiens OX=9606 GN=LOXL3 PE=1 SV=1;tr|Q53TY1|Q53TY1_HUMAN Uncharacterized protein LOXL3 (Fragment) OS=Homo sapiens OX=9606 GN=LOXL3 PE=4 SV=1;tr|B9A025|B9A025_HUMAN Lysyl oxidase homolog 3 O	5	1	1	0	0	0	0	0	0	1	1	1	0	0	0	0	0	0	1	1	1	8.9	8.9	19.508	180	0	18.262	0	0	0	0	0	0	8.9	8.9	8.9	0	0	0	0	0	0	0	2843400
459	H7C5U2	Integrin beta (Fragment)	ITGB5	H7C5U2;D3DNA1;L7RT22;P18084;V9GZ57	tr|H7C5U2|H7C5U2_HUMAN Integrin beta (Fragment) OS=Homo sapiens OX=9606 GN=ITGB5 PE=1 SV=1;tr|D3DNA1|D3DNA1_HUMAN Integrin beta OS=Homo sapiens OX=9606 GN=ITGB5 PE=3 SV=1;tr|L7RT22|L7RT22_HUMAN Integrin beta OS=Homo sapiens OX=9606 GN=ITGB5 PE=2 SV=1;sp|P1	5	4	4	1	1	1	3	0	0	1	2	1	1	1	1	3	0	0	1	2	1	18	18	43.65	401	0	84.834	1.7	1.7	1.7	12.5	0	0	1.7	7.2	1.7	0	0	0	0	0	0	0	4787800
0	H8WV86	MHC class II antigen (Fragment)	HLA-DRB1	H8WV86;R4S853;Q9TQ62;Q9TQ61;Q9TQ48;Q9TQ42;Q9TQ41;Q9TPE1;Q9TQ64;Q9TP92;Q9TNV2;Q9NPL1;Q9MYG3;Q9MY91;Q9GJG2;Q9GJF7;Q9GIY9;Q9TNV3;Q9GIY6;Q9UIM7;Q9UM34;R9WSK7;R9USG0;Q9TQ63;J7RFS4;M9PAH5;F8RHK1;F8RHM5;G8HT84;G8HT85;G8HT86;G8HT87;F8RHJ4;F8RHJ5;F8RHJ7;F8RHJ9;F8RHK2;J7K483;F8RHK5;F8RHK6;F8RHK8;F8RHK9;F8RHL0;F8RHL1;F8RHL5;F8RHL7;F8RHJ2;Q95HK3;R4S813;Q95HK2;R4QU67;Q7YQ32;Q7YQ31;Q7YQ27;Q7YPZ9;Q7YPZ8;Q7YPZ4;…	tr|H8WV86|H8WV86_HUMAN MHC class II antigen (Fragment) OS=Homo sapiens OX=9606 GN=HLA-DRB1 PE=4 SV=1;tr|R4S853|R4S853_HUMAN MHC class I antigen (Fragment) OS=Homo sapiens OX=9606 GN=HLA-C PE=4 SV=1;tr|Q9TQ62|Q9TQ62_HUMAN MHC class II antigen (Fragment) OS=	1558	1	1	0	0	0	1	0	0	0	0	0	0	0	0	1	0	0	0	0	0	23.6	23.6	8.6783	72	0	2.214	0	0	0	23.6	0	0	0	0	0	0	0	0	39992000	0	0	0	0
216	I2D5J2	Apolipoprotein M (Fragment)	APOM	I2D5J2;I2D5I8;A0A1U9X793;Q5SRP5;O95445	tr|I2D5J2|I2D5J2_HUMAN Apolipoprotein M (Fragment) OS=Homo sapiens OX=9606 GN=APOM PE=4 SV=1;tr|I2D5I8|I2D5I8_HUMAN Apolipoprotein M (Fragment) OS=Homo sapiens OX=9606 GN=APOM PE=4 SV=1;tr|A0A1U9X793|A0A1U9X793_HUMAN APOM OS=Homo sapiens OX=9606 PE=4 SV=1;	5	1	1	0	0	0	0	0	0	0	1	0	0	0	0	0	0	0	0	1	0	26.7	26.7	9.3636	86	0	55.292	0	0	0	0	0	0	0	26.7	0	0	0	0	0	0	0	0	5683700
145	I3L192	Basigin (Fragment)	BSG	I3L192;A0A087X2B5;B4DY23;Q54A51;B4DNE1;P35613;R4GMX5;A0A2R8YDZ0;A8MZ77;A0A087WUV8	tr|I3L192|I3L192_HUMAN Basigin (Fragment) OS=Homo sapiens OX=9606 GN=BSG PE=1 SV=8;tr|A0A087X2B5|A0A087X2B5_HUMAN Basigin (Fragment) OS=Homo sapiens OX=9606 GN=BSG PE=1 SV=1;tr|B4DY23|B4DY23_HUMAN cDNA FLJ61188, highly similar to Basigin OS=Homo sapiens OX	10	2	2	2	1	2	2	2	2	2	2	2	2	1	2	2	2	2	2	2	2	16.9	16.9	17.247	160	0	127.59	16.9	11.2	16.9	16.9	16.9	16.9	16.9	16.9	16.9	134640000	396560000	121720000	257470000	286730000	307880000	370930000	447570000
498	J3KPA2	TM2 domain containing 1, isoform CRA_c (TM2 domain-containing protein 1)	TM2D1 hCG_1780983	J3KPA2;Q9BX74	tr|J3KPA2|J3KPA2_HUMAN TM2 domain containing 1, isoform CRA_c OS=Homo sapiens OX=9606 GN=TM2D1 PE=1 SV=1;sp|Q9BX74|TM2D1_HUMAN TM2 domain-containing protein 1 OS=Homo sapiens OX=9606 GN=TM2D1 PE=1 SV=1	2	1	1	0	0	0	0	0	1	0	0	0	0	0	0	0	0	1	0	0	0	3.3	3.3	28.807	269	0.0052174	1.0413	0	0	0	0	0	3.3	0	0	0	0	0	0	0	0	6386700	0	0
317	J3QRJ3	Thy-1 membrane glycoprotein	THY1	J3QRJ3;Q59GA0;E9PIM6;B0YJA4;E9PNQ8;P04216	tr|J3QRJ3|J3QRJ3_HUMAN Thy-1 membrane glycoprotein OS=Homo sapiens OX=9606 GN=THY1 PE=1 SV=1;tr|Q59GA0|Q59GA0_HUMAN Thy-1 cell surface antigen variant (Fragment) OS=Homo sapiens OX=9606 PE=2 SV=1;tr|E9PIM6|E9PIM6_HUMAN Thy-1 membrane glycoprotein (Fragment	6	3	3	0	0	0	2	3	2	3	2	2	0	0	0	2	3	2	3	2	2	34.7	34.7	16.149	144	0	323.31	0	0	0	30.6	34.7	30.6	34.7	30.6	30.6	0	0	0	368120000	340920000	465880000	301730000	344590000
57	K7EKF6	Angiopoietin-related protein 6	ANGPTL6	K7EKF6;A0A024R7A9;Q8NI99	tr|K7EKF6|K7EKF6_HUMAN Angiopoietin-related protein 6 OS=Homo sapiens OX=9606 GN=ANGPTL6 PE=1 SV=1;tr|A0A024R7A9|A0A024R7A9_HUMAN Angiopoietin-like 6, isoform CRA_a OS=Homo sapiens OX=9606 GN=ANGPTL6 PE=4 SV=1;sp|Q8NI99|ANGL6_HUMAN Angiopoietin-related pro	3	2	2	0	1	1	0	0	0	2	0	1	0	1	1	0	0	0	2	0	1	5.8	5.8	46.991	430	0	3.635	0	3.5	3.5	0	0	0	5.8	0	2.3	0	11175000	10133000	0	0	0	5063800	0
164	K7ELZ9	Nicalin (Fragment)	NCLN	K7ELZ9;K7ENM2;A0A0C4DGP7;K7EMW4;B2RA56;Q969V3	tr|K7ELZ9|K7ELZ9_HUMAN Nicalin (Fragment) OS=Homo sapiens OX=9606 GN=NCLN PE=1 SV=1;tr|K7ENM2|K7ENM2_HUMAN Nicalin (Fragment) OS=Homo sapiens OX=9606 GN=NCLN PE=1 SV=1;tr|A0A0C4DGP7|A0A0C4DGP7_HUMAN Nicalin (Fragment) OS=Homo sapiens OX=9606 GN=NCLN PE=1 S	6	1	1	0	0	0	1	0	0	0	0	0	0	0	0	1	0	0	0	0	0	2.8	2.8	32.457	282	1	-2	0	0	0	2.8	0	0	0	0	0	0	0	0	9667900	0	0	0	0
284	K7EMC3	Apolipoprotein C-IV	APOC4	K7EMC3;A5YAK2;K7ER74;P55056	tr|K7EMC3|K7EMC3_HUMAN Apolipoprotein C-IV OS=Homo sapiens OX=9606 GN=APOC4 PE=4 SV=1;tr|A5YAK2|A5YAK2_HUMAN Apolipoprotein C-IV OS=Homo sapiens OX=9606 GN=APOC4 PE=2 SV=1;tr|K7ER74|K7ER74_HUMAN APOC4-APOC2 readthrough (NMD candidate) OS=Homo sapiens OX=96	4	1	1	0	0	0	1	0	0	0	0	0	0	0	0	1	0	0	0	0	0	12.3	12.3	8.3669	73	1	-2	0	0	0	12.3	0	0	0	0	0	0	0	0	2739600	0	0	0	0
340	K7EP71	Heparan sulfate 2-O-sulfotransferase 1 (Fragment)	HS2ST1	K7EP71;B3KN15;Q7LGA3	tr|K7EP71|K7EP71_HUMAN Heparan sulfate 2-O-sulfotransferase 1 (Fragment) OS=Homo sapiens OX=9606 GN=HS2ST1 PE=1 SV=1;tr|B3KN15|B3KN15_HUMAN cDNA FLJ13198 fis, clone NT2RP3004454, highly similar to Heparan sulfate 2-O-sulfotransferase 1 OS=Homo sapiens OX=9	3	1	1	0	0	0	1	0	0	0	0	1	0	0	0	1	0	0	0	0	1	9	9	12.936	111	0.006483	0.69896	0	0	0	9	0	0	0	0	9	0	0	0	5851600	0	0	0	0
329	K7EPJ4	Cartilage intermediate layer protein 2 (Cartilage intermediate layer protein 2, isoform CRA_b)	CILP2 hCG_38566	K7EPJ4;B2RAJ0;Q8IUL8	tr|K7EPJ4|K7EPJ4_HUMAN Cartilage intermediate layer protein 2, isoform CRA_b OS=Homo sapiens OX=9606 GN=CILP2 PE=1 SV=1;tr|B2RAJ0|B2RAJ0_HUMAN cDNA, FLJ94946, highly similar to Homo sapiens cartilage intermediate layer protein 2 (CILP2), mRNA OS=Homo sapie	3	6	6	3	5	5	3	2	3	2	3	2	3	5	5	3	2	3	2	3	2	7	7	126.86	1162	0	92.994	2.8	6.2	6	2.8	2	2.8	1.8	2.8	1.9	959260000	1328900000	1368700000	150880000	88309000	301920000	1229200000	887590000
28	K7EQG0	GPI ethanolamine phosphate transferase 1 (Fragment)	PIGN	K7EQG0;K7EID9;A0A1W2PS19;A0A024R2C3;B2RCI8;A0A1W2PNH8;A0A1W2PNR0;A0A1W2PQP4;A0A1W2PQR8;A0A1W2PNQ8;A0A1W2PQZ1;A0A1W2PPR7;A0A1W2PPB6;A0A1W2PNW5;K7ELE1;K7EMD7;K7EPJ2;A0A1W2PRH3;K7EL34;K7ESH9;A0A1W2PQ49;A0A1W2PQA9;O95427	tr|K7EQG0|K7EQG0_HUMAN GPI ethanolamine phosphate transferase 1 (Fragment) OS=Homo sapiens OX=9606 GN=PIGN PE=1 SV=2;tr|K7EID9|K7EID9_HUMAN GPI ethanolamine phosphate transferase 1 (Fragment) OS=Homo sapiens OX=9606 GN=PIGN PE=1 SV=1;tr|A0A1W2PS19|A0A1W2PS	23	1	1	0	0	0	0	0	0	0	1	0	0	0	0	0	0	0	0	1	0	10.1	10.1	15.608	138	0	3.7173	0	0	0	0	0	0	0	10.1	0	0	0	0	0	0	0	0	0
371	K7EQI0	Progranulin (Fragment)	GRN	K7EQI0;K7EKL3;K7EQ05;B4E1G5;B4DJI2;P28799	tr|K7EQI0|K7EQI0_HUMAN Granulins (Fragment) OS=Homo sapiens OX=9606 GN=GRN PE=1 SV=1;tr|K7EKL3|K7EKL3_HUMAN Granulins (Fragment) OS=Homo sapiens OX=9606 GN=GRN PE=1 SV=1;tr|K7EQ05|K7EQ05_HUMAN Granulins OS=Homo sapiens OX=9606 GN=GRN PE=1 SV=1;tr|B4E1G5|B4	6	1	1	0	0	1	1	0	0	1	1	1	0	0	1	1	0	0	1	1	1	16.4	16.4	11.722	110	0	20.388	0	0	16.4	16.4	0	0	16.4	16.4	16.4	0	0	13227000	0	0	0	22763000	8837400
7	K7ES70	Microfibril-associated glycoprotein 4	MFAP4	K7ES70;A0A024QZ34;P55083	tr|K7ES70|K7ES70_HUMAN Microfibril-associated glycoprotein 4 OS=Homo sapiens OX=9606 GN=MFAP4 PE=1 SV=1;tr|A0A024QZ34|A0A024QZ34_HUMAN Microfibrillar-associated protein 4, isoform CRA_a OS=Homo sapiens OX=9606 GN=MFAP4 PE=4 SV=1;sp|P55083|MFAP4_HUMAN Micro	3	3	3	1	2	2	3	1	2	2	1	2	1	2	2	3	1	2	2	1	2	10.4	10.4	31.326	280	0	285.79	3.2	8.2	8.2	10.4	3.2	8.2	8.2	5	8.2	509540000	454120000	417260000	383380000	297310000	119000000	598180000	336970000
123	K9J972	FAS receptor variant 9 (Tumor necrosis factor receptor superfamily member 6)	FAS	K9J972;E6Y7C4;F0UWG7;A0A1C6ZWA8;H7C5Z8;A0A087WTM9;B6VNV5;E6Y7C3;Q6ICT6;A0A1B0QZF0;Q59FU8;P25445	tr|K9J972|K9J972_HUMAN FAS receptor variant 9 OS=Homo sapiens OX=9606 PE=2 SV=1;tr|E6Y7C4|E6Y7C4_HUMAN FAS variant OS=Homo sapiens OX=9606 GN=FAS PE=2 SV=1;tr|F0UWG7|F0UWG7_HUMAN FAS 827dupA variant OS=Homo sapiens OX=9606 GN=FAS PE=2 SV=1;tr|A0A1C6ZWA8|A0	12	1	1	0	0	0	1	0	0	0	0	0	0	0	0	1	0	0	0	0	0	8.1	8.1	21.955	197	0	2.6955	0	0	0	8.1	0	0	0	0	0	0	0	0	0	0	0	0	0
285	L7RXH0	Integrin, alpha V	ITGAV	L7RXH0;A5YM53;P06756	tr|L7RXH0|L7RXH0_HUMAN Integrin, alpha V OS=Homo sapiens OX=9606 GN=ITGAV PE=3 SV=1;tr|A5YM53|A5YM53_HUMAN ITGAV protein OS=Homo sapiens OX=9606 GN=ITGAV PE=2 SV=1;sp|P06756|ITAV_HUMAN Integrin alpha-V OS=Homo sapiens OX=9606 GN=ITGAV PE=1 SV=2	5	5	5	3	2	3	4	3	2	4	4	4	3	2	3	4	3	2	4	4	4	7	7	116.04	1048	0	323.31	5.4	3.3	3.9	6.4	5.4	3.3	6.4	6.4	4.9	52847000	119290000	62686000	203710000	133150000	45500000	126330000	191260000
500	M0QYS6	Urokinase plasminogen activator surface receptor (Fragment)	PLAUR	M0QYS6;M0R383;M0R0Y4;M0QYR6;Q9UPI5;M0R1I2;Q03405	tr|M0QYS6|M0QYS6_HUMAN Urokinase plasminogen activator surface receptor (Fragment) OS=Homo sapiens OX=9606 GN=PLAUR PE=1 SV=1;tr|M0R383|M0R383_HUMAN Urokinase plasminogen activator surface receptor (Fragment) OS=Homo sapiens OX=9606 GN=PLAUR PE=1 SV=1;tr|M	7	1	1	1	0	0	0	0	0	0	1	0	1	0	0	0	0	0	0	1	0	18	18	14.863	133	1	-2	18	0	0	0	0	0	0	18	0	0	0	0	0	0	0	0	5223500
268	M0QYW8	L-amino-acid oxidase (Fragment)	IL4I1	M0QYW8;A2RRH1;Q96RQ9	tr|M0QYW8|M0QYW8_HUMAN L-amino-acid oxidase (Fragment) OS=Homo sapiens OX=9606 GN=IL4I1 PE=1 SV=1;tr|A2RRH1|A2RRH1_HUMAN Amine oxidase OS=Homo sapiens OX=9606 GN=IL4I1 PE=2 SV=1;sp|Q96RQ9|OXLA_HUMAN L-amino-acid oxidase OS=Homo sapiens OX=9606 GN=IL4I1 PE=	3	1	1	0	0	0	1	1	1	0	0	0	0	0	0	1	1	1	0	0	0	7.3	7.3	17.291	150	0.0053476	1.2231	0	0	0	7.3	7.3	7.3	0	0	0	0	0	0	27494000	0	32560000	0	0
501	M0QZH0	Reticulocalbin-3 (Fragment)	RCN3	M0QZH0;Q96D15	tr|M0QZH0|M0QZH0_HUMAN Reticulocalbin-3 (Fragment) OS=Homo sapiens OX=9606 GN=RCN3 PE=1 SV=1;sp|Q96D15|RCN3_HUMAN Reticulocalbin-3 OS=Homo sapiens OX=9606 GN=RCN3 PE=1 SV=1	2	2	2	0	0	1	1	0	0	1	2	2	0	0	1	1	0	0	1	2	2	14.2	14.2	19.813	169	0	168.64	0	0	13.6	13.6	0	0	13.6	14.2	14.2	0	0	13874000	80166000	0	0	91705000	136420000
9	M0R122	Epithelial membrane protein 3	EMP3	M0R122;M0QZ66;Q6IBD3;A0A024QZF8;P54852	tr|M0R122|M0R122_HUMAN Epithelial membrane protein 3 OS=Homo sapiens OX=9606 GN=EMP3 PE=1 SV=1;tr|M0QZ66|M0QZ66_HUMAN Epithelial membrane protein 3 (Fragment) OS=Homo sapiens OX=9606 GN=EMP3 PE=1 SV=8;tr|Q6IBD3|Q6IBD3_HUMAN Epithelial membrane protein 3 OS	5	1	1	1	1	1	1	0	0	1	1	1	1	1	1	1	0	0	1	1	1	25.4	25.4	7.1382	63	0	323.31	25.4	25.4	25.4	25.4	0	0	25.4	25.4	25.4	17492000	22868000	26801000	29316000	0	0	0	24751000
10	M0R266	IgG receptor FcRn large subunit p51 (Fragment)	FCGRT	M0R266;M0R0H0;M0QYM4;M0R220;M0QYN1;M0QYN9;A0A1W6R2Z1;A0A1W6R2Y2;A0A024QZI2;P55899	tr|M0R266|M0R266_HUMAN IgG receptor FcRn large subunit p51 (Fragment) OS=Homo sapiens OX=9606 GN=FCGRT PE=1 SV=1;tr|M0R0H0|M0R0H0_HUMAN IgG receptor FcRn large subunit p51 (Fragment) OS=Homo sapiens OX=9606 GN=FCGRT PE=1 SV=1;tr|M0QYM4|M0QYM4_HUMAN IgG rec	10	1	1	0	0	0	1	0	0	0	1	0	0	0	0	1	0	0	0	1	0	17	17	15.498	141	0	297.48	0	0	0	17	0	0	0	17	0	0	0	0	9990700	0	0	0	0
502	O00300	Tumor necrosis factor receptor superfamily member 11B (Osteoclastogenesis inhibitory factor) (Osteoprotegerin)	TNFRSF11B OCIF OPG	O00300	sp|O00300|TR11B_HUMAN Tumor necrosis factor receptor superfamily member 11B OS=Homo sapiens OX=9606 GN=TNFRSF11B PE=1 SV=3	1	4	4	4	4	4	3	2	2	4	2	3	4	4	4	3	2	2	4	2	3	14.5	14.5	46.026	401	0	323.31	14.5	14.5	14.5	10	7.7	7.7	14.5	7.7	11	818020000	3013800000	1627700000	135920000	74766000	56473000	280030000	207220000
503	O00468	Agrin [Cleaved into: Agrin N-terminal 110 kDa subunit; Agrin C-terminal 110 kDa subunit; Agrin C-terminal 90 kDa fragment (C90); Agrin C-terminal 22 kDa fragment (C22)]	AGRN AGRIN	O00468	sp|O00468|AGRIN_HUMAN Agrin OS=Homo sapiens OX=9606 GN=AGRN PE=1 SV=6	1	1	1	0	0	0	1	0	0	0	0	0	0	0	0	1	0	0	0	0	0	0.5	0.5	217.32	2068	0.0050847	0.87921	0	0	0	0.5	0	0	0	0	0	0	0	0	2025300	0	0	0	0
504	O15031	Plexin-B2 (MM1)	PLXNB2 KIAA0315	O15031	sp|O15031|PLXB2_HUMAN Plexin-B2 OS=Homo sapiens OX=9606 GN=PLXNB2 PE=1 SV=3	3	5	5	0	0	0	5	0	0	0	1	0	0	0	0	5	0	0	0	1	0	4.6	4.6	205.12	1838	0	209.59	0	0	0	4.6	0	0	0	0.9	0	0	0	0	32993000	0	0	0	0
505	O15230	Laminin subunit alpha-5 (Laminin-10 subunit alpha) (Laminin-11 subunit alpha) (Laminin-15 subunit alpha)	LAMA5 KIAA0533 KIAA1907	O15230	sp|O15230|LAMA5_HUMAN Laminin subunit alpha-5 OS=Homo sapiens OX=9606 GN=LAMA5 PE=1 SV=8	1	2	2	0	0	0	1	0	0	0	2	0	0	0	0	1	0	0	0	2	0	1.1	1.1	399.73	3695	0	114.62	0	0	0	0.4	0	0	0	1.1	0	0	0	0	11765000	0	0	0	8661800
110	O19189	HLA-B protein (Fragment)	HLA-B	O19189;F8R178;F4YZT9;F4ZZU4;F5CJE0;F6KRP8;F6KRT5;F6KRU4;F6KS39;T1R3B4;C9WEQ2;F8R179;F8R191;F8R192;F8R196;F8R8J3;G0Z8C7;G1ENF5;T1WEP8;G0Z8D6;G0Z8D3;G0KXF1;G1EPQ1;G1EPQ7;G1EPL5;G3CC81;T1R3B1;G1EPX5;G1EPJ0;G3CC82;G3D6I8;G3LX85;G9I2L4;H2BEA9;H2E2A5;G1EPX3;G1ENL5;R4ZGR6;G0ZMH6;Q29760;Q8MHN3;Q861A2;Q4F7G3;Q4JHL0;Q50HP8;Q5ND70;Q56SH9;Q5EJW2;Q56SI0;Q95IB9;M9P9L5;M4MD28;Q9GIM8;I3QHR5;I4ENX3;M9P9Z9;Q8MHM8;…	tr|O19189|O19189_HUMAN HLA-B protein (Fragment) OS=Homo sapiens OX=9606 GN=HLA-B PE=2 SV=1;tr|F8R178|F8R178_HUMAN MHC class I antigen (Fragment) OS=Homo sapiens OX=9606 GN=HLA-B PE=3 SV=1;tr|F4YZT9|F4YZT9_HUMAN MHC class I antigen (Fragment) OS=Homo sapien	304	1	1	0	0	0	0	0	0	0	1	0	0	0	0	0	0	0	0	1	0	18.8	18.8	15.491	133	0	78.107	0	0	0	0	0	0	0	18.8	0	0	0	0	0	0	0	0	24362000
508	O43157	Plexin-B1 (Semaphorin receptor SEP)	PLXNB1 KIAA0407 PLXN5 SEP	O43157	sp|O43157|PLXB1_HUMAN Plexin-B1 OS=Homo sapiens OX=9606 GN=PLXNB1 PE=1 SV=3	1	1	1	0	0	0	1	0	0	0	0	0	0	0	0	1	0	0	0	0	0	0.7	0.7	232.3	2135	1	-2	0	0	0	0.7	0	0	0	0	0	0	0	0	1650200	0	0	0	0
509	O43827	Angiopoietin-related protein 7 (Angiopoietin-like factor) (Angiopoietin-like protein 7) (Cornea-derived transcript 6 protein)	ANGPTL7 CDT6 UNQ313/PRO356	O43827	sp|O43827|ANGL7_HUMAN Angiopoietin-related protein 7 OS=Homo sapiens OX=9606 GN=ANGPTL7 PE=1 SV=1	1	3	3	2	0	0	3	3	3	2	3	2	2	0	0	3	3	3	2	3	2	14.5	14.5	40.018	346	0	123.53	11.8	0	0	14.5	14.5	14.5	6.9	14.5	6.9	21922000	0	0	251760000	105640000	74544000	15779000	174410000
510	O43854	EGF-like repeat and discoidin I-like domain-containing protein 3 (Developmentally-regulated endothelial cell locus 1 protein) (Integrin-binding protein DEL1)	EDIL3 DEL1	O43854	sp|O43854|EDIL3_HUMAN EGF-like repeat and discoidin I-like domain-containing protein 3 OS=Homo sapiens OX=9606 GN=EDIL3 PE=1 SV=1	1	2	2	1	1	1	0	0	0	0	2	2	1	1	1	0	0	0	0	2	2	7.3	7.3	53.764	480	0	85.039	2.5	2.5	2.5	0	0	0	0	7.3	7.3	15936000	43426000	0	0	0	0	0	0
512	O60687	Sushi repeat-containing protein SRPX2 (Sushi-repeat protein upregulated in leukemia)	SRPX2 SRPUL	O60687;A0A1W2PNZ6	sp|O60687|SRPX2_HUMAN Sushi repeat-containing protein SRPX2 OS=Homo sapiens OX=9606 GN=SRPX2 PE=1 SV=1;tr|A0A1W2PNZ6|A0A1W2PNZ6_HUMAN Sushi repeat-containing protein SRPX2 (Fragment) OS=Homo sapiens OX=9606 GN=SRPX2 PE=1 SV=1	2	2	2	0	0	0	0	0	0	2	2	2	0	0	0	0	0	0	2	2	2	7.5	7.5	52.971	465	0	52.346	0	0	0	0	0	0	7.5	7.5	7.5	0	0	0	0	0	0	15031000	8283600
513	O75106	Retina-specific copper amine oxidase (RAO) (EC 1.4.3.21) (Amine oxidase [copper-containing]) (Semicarbazide-sensitive amine oxidase) (SSAO)	AOC2	O75106	sp|O75106|AOC2_HUMAN Retina-specific copper amine oxidase OS=Homo sapiens OX=9606 GN=AOC2 PE=1 SV=2	1	1	1	0	0	0	1	1	0	0	1	1	0	0	0	1	1	0	0	1	1	2.1	2.1	83.672	756	0	12.672	0	0	0	2.1	2.1	0	0	2.1	2.1	0	0	0	4696900	10206000	0	0	23723000
514	O75294	Chromosome 19 open reading frame 15, isoform CRA_e (R27328_1)	C19orf15 hCG_1642159	O75294	tr|O75294|O75294_HUMAN Chromosome 19 open reading frame 15, isoform CRA_e OS=Homo sapiens OX=9606 GN=C19orf15 PE=4 SV=1	1	1	1	1	0	0	1	0	0	1	0	0	1	0	0	1	0	0	1	0	0	2.9	2.9	58.07	517	0.0049423	0.76941	2.9	0	0	2.9	0	0	2.9	0	0	0	0	0	0	0	0	0	0
515	O75339	Cartilage intermediate layer protein 1 (CILP-1) (Cartilage intermediate-layer protein) [Cleaved into: Cartilage intermediate layer protein 1 C1; Cartilage intermediate layer protein 1 C2]	CILP UNQ602/PRO1188	O75339	sp|O75339|CILP1_HUMAN Cartilage intermediate layer protein 1 OS=Homo sapiens OX=9606 GN=CILP PE=1 SV=4	1	15	15	10	12	13	8	5	6	10	11	11	10	12	13	8	5	6	10	11	11	16.1	16.1	132.56	1184	0	323.31	12.2	13.3	14.9	7.7	5.6	7.2	11.5	12.6	12.6	22426000000	40003000000	46989000000	3360000000	1854000000	3414200000	22208000000	10082000000
516	O75462	Cytokine receptor-like factor 1 (Cytokine-like factor 1) (CLF-1) (ZcytoR5)	CRLF1 UNQ288/PRO327	O75462	sp|O75462|CRLF1_HUMAN Cytokine receptor-like factor 1 OS=Homo sapiens OX=9606 GN=CRLF1 PE=1 SV=1	2	3	3	1	3	2	3	2	2	2	2	2	1	3	2	3	2	2	2	2	2	11.4	11.4	46.301	422	0	108.4	2.8	11.4	7.1	11.4	7.1	7.1	7.1	7.1	7.1	20090000	182920000	168200000	126810000	34685000	29899000	52183000	47065000
517	O75829	Leukocyte cell-derived chemotaxin 1 (Chondromodulin) [Cleaved into: Chondrosurfactant protein (CH-SP); Chondromodulin-1 (Chondromodulin-I) (ChM-I)]	CNMD CHMI LECT1 MYETS1	O75829	sp|O75829|CNMD_HUMAN Leukocyte cell-derived chemotaxin 1 OS=Homo sapiens OX=9606 GN=CNMD PE=1 SV=1	1	1	1	1	1	1	1	0	0	1	1	1	1	1	1	1	0	0	1	1	1	10.5	10.5	37.102	334	0	146.99	10.5	10.5	10.5	10.5	0	0	10.5	10.5	10.5	54729000	119520000	130910000	49036000	0	0	166430000	197180000
518	O75976	Carboxypeptidase D (EC 3.4.17.22) (Metallocarboxypeptidase D) (gp180)	CPD	O75976	sp|O75976|CBPD_HUMAN Carboxypeptidase D OS=Homo sapiens OX=9606 GN=CPD PE=1 SV=2	1	1	1	0	0	0	0	0	0	0	1	0	0	0	0	0	0	0	0	1	0	1.4	1.4	152.93	1380	0.0049342	0.768	0	0	0	0	0	0	0	1.4	0	0	0	0	0	0	0	0	0
349	O95084	Serine protease 23 (EC 3.4.21.-) (Putative secreted protein Zsig13)	PRSS23 ZSIG13 UNQ270/PRO307	O95084;B3KQQ9;E9PRR2	sp|O95084|PRS23_HUMAN Serine protease 23 OS=Homo sapiens OX=9606 GN=PRSS23 PE=1 SV=1;tr|B3KQQ9|B3KQQ9_HUMAN cDNA PSEC0048 fis, clone NT2RP2000028, highly similar to Serine protease 23 OS=Homo sapiens OX=9606 PE=2 SV=1;tr|E9PRR2|E9PRR2_HUMAN Serine protease	3	2	2	0	0	0	2	0	0	0	1	0	0	0	0	2	0	0	0	1	0	7.3	7.3	43.001	383	0	50.974	0	0	0	7.3	0	0	0	3.7	0	0	0	0	13205000	0	0	0	13713000
519	O95631	Netrin-1 (Epididymis tissue protein Li 131P)	NTN1 NTN1L	O95631;H7BZF4;O00634	sp|O95631|NET1_HUMAN Netrin-1 OS=Homo sapiens OX=9606 GN=NTN1 PE=1 SV=2;tr|H7BZF4|H7BZF4_HUMAN Netrin-1 (Fragment) OS=Homo sapiens OX=9606 GN=NTN1 PE=1 SV=3;sp|O00634|NET3_HUMAN Netrin-3 OS=Homo sapiens OX=9606 GN=NTN3 PE=1 SV=1	3	2	2	0	2	0	2	1	1	2	2	2	0	2	0	2	1	1	2	2	2	3.8	3.8	67.748	604	0	323.31	0	3.8	0	3.8	2	2	3.8	3.8	3.8	0	40007000	0	25370000	61589000	22410000	25329000	11613000
219	P00533	Epidermal growth factor receptor (EC 2.7.10.1) (Proto-oncogene c-ErbB-1) (Receptor tyrosine-protein kinase erbB-1)	EGFR ERBB ERBB1 HER1	P00533;E7BSV0;A8K2T7;A9CB80;Q2TTR7;F2YGG7;E9PFD7;B7Z2I3;Q504U8;Q59FL8;Q68GS6;A0A1W2PRR9;Q147T7;A2VCQ7;Q9H3C8;A0A2D3C335;F1JTL6;Q9H3D0	sp|P00533|EGFR_HUMAN Epidermal growth factor receptor OS=Homo sapiens OX=9606 GN=EGFR PE=1 SV=2;tr|E7BSV0|E7BSV0_HUMAN Receptor protein-tyrosine kinase OS=Homo sapiens OX=9606 GN=EGFR PE=2 SV=1;tr|A8K2T7|A8K2T7_HUMAN Receptor protein-tyrosine kinase OS=Hom	18	2	2	0	0	0	2	0	0	0	1	0	0	0	0	2	0	0	0	1	0	2.2	2.2	134.28	1210	0	13.442	0	0	0	2.2	0	0	0	1.3	0	0	0	0	8290400	0	0	0	0
520	P01023	Alpha-2-macroglobulin (Alpha-2-M) (C3 and PZP-like alpha-2-macroglobulin domain-containing protein 5)	A2M CPAMD5 FWP007	P01023;F5H1E8;F8W7L3	sp|P01023|A2MG_HUMAN Alpha-2-macroglobulin OS=Homo sapiens OX=9606 GN=A2M PE=1 SV=3;tr|F5H1E8|F5H1E8_HUMAN Alpha-2-macroglobulin OS=Homo sapiens OX=9606 GN=A2M PE=1 SV=1;tr|F8W7L3|F8W7L3_HUMAN Alpha-2-macroglobulin (Fragment) OS=Homo sapiens OX=9606 GN=A2M	3	2	2	0	1	0	1	1	0	0	0	1	0	1	0	1	1	0	0	0	1	3.7	3.7	163.29	1474	0	85.646	0	1.5	0	2.2	1.5	0	0	0	1.5	0	0	0	35960000	0	0	0	0
150	P01857	Immunoglobulin heavy constant gamma 1 (Ig gamma-1 chain C region) (Ig gamma-1 chain C region EU) (Ig gamma-1 chain C region KOL) (Ig gamma-1 chain C region NIE)	IGHG1	P01857;Q6N096;Q6N097;Q6N094;Q5EFE5;Q6MZQ6;Q6N095;Q6MZV7;A8K008;Q6N089;V9HW68;S6B291;Q6GMX6;P0DOX5;A0A0A0MS08;Q6PYX1;Q7Z351	sp|P01857|IGHG1_HUMAN Immunoglobulin heavy constant gamma 1 OS=Homo sapiens OX=9606 GN=IGHG1 PE=1 SV=1;tr|Q6N096|Q6N096_HUMAN Uncharacterized protein DKFZp686I15196 OS=Homo sapiens OX=9606 GN=DKFZp686I15196 PE=2 SV=1;tr|Q6N097|Q6N097_HUMAN Uncharacterized	24	3	2	2	2	2	3	1	2	2	3	3	2	2	2	2	1	2	2	2	2	13.3	8.5	36.105	330	0	323.31	8.5	8.5	8.5	13.3	2.7	8.5	8.5	13.3	13.3	773010000	2109800000	1473200000	2813600000	1047700000	1610100000	3803200000	9849600000
521	P01871	Immunoglobulin heavy constant mu (Ig mu chain C region) (Ig mu chain C region BOT) (Ig mu chain C region GAL) (Ig mu chain C region OU)	IGHM	P01871;A0A1B0GUU9	sp|P01871|IGHM_HUMAN Immunoglobulin heavy constant mu OS=Homo sapiens OX=9606 GN=IGHM PE=1 SV=4;tr|A0A1B0GUU9|A0A1B0GUU9_HUMAN Immunoglobulin heavy constant mu (Fragment) OS=Homo sapiens OX=9606 GN=IGHM PE=1 SV=1	4	5	5	0	2	2	5	1	4	4	4	3	0	2	2	5	1	4	4	4	3	19	19	49.439	453	0	323.31	0	7.1	6.6	19	2	11.9	11.9	11.9	7.1	0	33708000	11504000	466200000	20303000	216090000	98926000	101410000
522	P02452	Collagen alpha-1(I) chain (Alpha-1 type I collagen)	COL1A1	P02452;Q6LAN8;H9C5C5	sp|P02452|CO1A1_HUMAN Collagen alpha-1(I) chain OS=Homo sapiens OX=9606 GN=COL1A1 PE=1 SV=5;tr|Q6LAN8|Q6LAN8_HUMAN Collagen type I alpha 1 (Fragment) OS=Homo sapiens OX=9606 GN=COL1A1 PE=4 SV=1;tr|H9C5C5|H9C5C5_HUMAN Collagen alpha-1(I) chain preproprotein	7	6	1	0	0	0	3	1	0	1	5	2	0	0	0	1	0	0	0	0	0	5.3	0.6	138.94	1464	1	-2	0	0	0	2.7	1	0	1	4.6	1.6	0	0	0	12945000	0	0	0	0
523	P02458	Collagen alpha-1(II) chain (Alpha-1 type II collagen) [Cleaved into: Collagen alpha-1(II) chain; Chondrocalcin]	COL2A1	P02458	sp|P02458|CO2A1_HUMAN Collagen alpha-1(II) chain OS=Homo sapiens OX=9606 GN=COL2A1 PE=1 SV=3	1	6	6	5	3	4	4	4	2	4	5	3	5	3	4	4	4	2	4	5	3	5.4	5.4	141.78	1487	0	323.31	4.1	2.9	3.5	3.5	3.5	1.6	3.5	4.8	2.3	496680000	19332000	2047600000	96061000	281670000	27979000	140860000	200070000
526	P02790	Hemopexin (Beta-1B-glycoprotein)	HPX	P02790;B7Z8Q4;Q9BS19	sp|P02790|HEMO_HUMAN Hemopexin OS=Homo sapiens OX=9606 GN=HPX PE=1 SV=2;tr|B7Z8Q4|B7Z8Q4_HUMAN cDNA FLJ56652, highly similar to Hemopexin OS=Homo sapiens OX=9606 PE=2 SV=1;tr|Q9BS19|Q9BS19_HUMAN Epididymis secretory sperm binding protein OS=Homo sapiens OX	3	2	2	1	1	1	2	1	1	1	1	1	1	1	1	2	1	1	1	1	1	8.2	8.2	51.676	462	0	101.77	3.5	3.5	3.5	8.2	3.5	3.5	3.5	3.5	3.5	208670000	336160000	231710000	314960000	218710000	262080000	486100000	668250000
527	P03951	Coagulation factor XI (FXI) (EC 3.4.21.27) (Plasma thromboplastin antecedent) (PTA) [Cleaved into: Coagulation factor XIa heavy chain; Coagulation factor XIa light chain]	F11	P03951	sp|P03951|FA11_HUMAN Coagulation factor XI OS=Homo sapiens OX=9606 GN=F11 PE=1 SV=1	3	3	3	0	0	1	2	1	3	2	3	3	0	0	1	2	1	3	2	3	3	6.6	6.6	70.108	625	0	111	0	0	3	4.6	1.6	6.6	3.5	6.6	6.6	0	0	0	34973000	28991000	42429000	66129000	44575000
111	P04062	Lysosomal acid glucosylceramidase (Lysosomal acid GCase) (EC 3.2.1.45) (Acid beta-glucosidase) (Alglucerase) (Beta-glucocerebrosidase) (Beta-GC) (Cholesterol glucosyltransferase) (SGTase) (EC 2.4.1.-) (Cholesteryl-beta-glucosidase) (EC 3.2.1.104) (D-glucosyl-N-acylsphingosine glucohydrolase) (Imiglucerase)	GBA GC GLUC	P04062;B7Z7G9;A0A068F658;A0A0G2JLB3;D3DV87;A0A223PQI4;B7Z731;A0A068FB60;A0A0G2JNZ5;B2R6A7;B7Z6E6;A0A0G2JNZ0;B4DMV8;A0A068F661;A0A068F753;A0A068F4C8;B4DHT6;B3KQW3;B7Z6S9;A0A068F579	sp|P04062|GLCM_HUMAN Glucosylceramidase OS=Homo sapiens OX=9606 GN=GBA PE=1 SV=3;tr|B7Z7G9|B7Z7G9_HUMAN Glucosylceramidase OS=Homo sapiens OX=9606 PE=2 SV=1;tr|A0A068F658|A0A068F658_HUMAN Glucosylceramidase OS=Homo sapiens OX=9606 GN=GBA PE=2 SV=1;tr|A0A0G	20	2	2	1	1	1	2	1	1	2	2	1	1	1	1	2	1	1	2	2	1	7.3	7.3	59.716	536	0	21.497	2.8	2.8	2.8	7.3	2.8	2.8	7.3	7.3	2.8	85580000	44255000	76171000	17658000	54653000	60406000	36492000	34000000
530	P04196	Histidine-rich glycoprotein (Histidine-proline-rich glycoprotein) (HPRG)	HRG	P04196;Q68DR3;B2R8I2	sp|P04196|HRG_HUMAN Histidine-rich glycoprotein OS=Homo sapiens OX=9606 GN=HRG PE=1 SV=1;tr|Q68DR3|Q68DR3_HUMAN Uncharacterized protein DKFZp779H1622 (Fragment) OS=Homo sapiens OX=9606 GN=DKFZp779H1622 PE=2 SV=1;tr|B2R8I2|B2R8I2_HUMAN cDNA, FLJ93914, highl	3	2	2	1	2	1	2	2	1	1	1	1	1	2	1	2	2	1	1	1	1	6.3	6.3	59.578	525	0	318.81	3.6	6.3	3.6	6.3	6.3	3.6	3.6	3.6	3.6	32080000	72648000	49105000	328290000	51768000	91026000	109790000	115750000
531	P05164	Myeloperoxidase (MPO) (EC 1.11.2.2) [Cleaved into: Myeloperoxidase; 89 kDa myeloperoxidase; 84 kDa myeloperoxidase; Myeloperoxidase light chain; Myeloperoxidase heavy chain]	MPO	P05164	sp|P05164|PERM_HUMAN Myeloperoxidase OS=Homo sapiens OX=9606 GN=MPO PE=1 SV=1	2	4	4	2	3	2	3	0	1	0	2	2	2	3	2	3	0	1	0	2	2	7.2	7.2	83.868	745	0	18.471	4.2	5.4	3	4.8	0	1.7	0	4.2	4.2	28251000	18673000	9821300	35579000	0	53731000	0	57210000
532	P05543	Thyroxine-binding globulin (Serpin A7) (T4-binding globulin)	SERPINA7 TBG	P05543	sp|P05543|THBG_HUMAN Thyroxine-binding globulin OS=Homo sapiens OX=9606 GN=SERPINA7 PE=1 SV=2	1	2	2	0	0	0	2	0	0	0	2	1	0	0	0	2	0	0	0	2	1	8.2	8.2	46.324	415	0	128.48	0	0	0	8.2	0	0	0	8.2	3.6	0	0	0	9529600	0	0	0	12453000
534	P05556	Integrin beta-1 (Fibronectin receptor subunit beta) (Glycoprotein IIa) (GPIIA) (VLA-4 subunit beta) (CD antigen CD29)	ITGB1 FNRB MDF2 MSK12	P05556	sp|P05556|ITB1_HUMAN Integrin beta-1 OS=Homo sapiens OX=9606 GN=ITGB1 PE=1 SV=2	8	6	6	0	1	2	6	1	5	3	5	2	0	1	2	6	1	5	3	5	2	12.2	12.2	88.414	798	0	323.31	0	2	3.8	12.2	1.8	8.4	6.5	8.4	3.5	0	24755000	16251000	173070000	11338000	65669000	0	39101000
535	P07357	Complement component C8 alpha chain (Complement component 8 subunit alpha)	C8A	P07357	sp|P07357|CO8A_HUMAN Complement component C8 alpha chain OS=Homo sapiens OX=9606 GN=C8A PE=1 SV=2	1	1	1	0	0	0	1	0	1	1	1	1	0	0	0	1	0	1	1	1	1	2.4	2.4	65.163	584	0	157.27	0	0	0	2.4	0	2.4	2.4	2.4	2.4	0	0	0	110960000	0	28914000	0	56095000
322	P08236	Beta-glucuronidase (EC 3.2.1.31) (Beta-G1)	GUSB	P08236;B2R6X2;B4DTH9	sp|P08236|BGLR_HUMAN Beta-glucuronidase OS=Homo sapiens OX=9606 GN=GUSB PE=1 SV=2;tr|B2R6X2|B2R6X2_HUMAN Beta-glucuronidase OS=Homo sapiens OX=9606 PE=2 SV=1;tr|B4DTH9|B4DTH9_HUMAN cDNA FLJ53190, highly similar to Beta-glucuronidase OS=Homo sapiens OX=9606	3	2	2	1	2	1	1	1	1	1	1	2	1	2	1	1	1	1	1	1	2	2.9	2.9	74.731	651	0	21.727	2	2.9	2	2	2	2	2	2	2.9	15213000	16080000	14733000	29300000	57620000	30952000	21975000	45825000
537	P08254	Stromelysin-1 (SL-1) (EC 3.4.24.17) (Matrix metalloproteinase-3) (MMP-3) (Transin-1)	MMP3 STMY1	P08254	sp|P08254|MMP3_HUMAN Stromelysin-1 OS=Homo sapiens OX=9606 GN=MMP3 PE=1 SV=2	1	2	2	0	0	0	0	0	0	0	1	2	0	0	0	0	0	0	0	1	2	8.2	8.2	53.977	477	0	1.6262	0	0	0	0	0	0	0	2.1	8.2	0	0	0	0	0	0	0	2873800
542	P12273	Prolactin-inducible protein (Gross cystic disease fluid protein 15) (GCDFP-15) (Prolactin-induced protein) (Secretory actin-binding protein) (SABP) (gp17)	PIP GCDFP15 GPIP4	P12273	sp|P12273|PIP_HUMAN Prolactin-inducible protein OS=Homo sapiens OX=9606 GN=PIP PE=1 SV=1	1	1	1	0	0	0	0	0	0	1	0	1	0	0	0	0	0	0	1	0	1	6.8	6.8	16.572	146	0	20.957	0	0	0	0	0	0	6.8	0	6.8	0	0	0	0	0	0	0	0
543	P13473	Lysosome-associated membrane glycoprotein 2 (LAMP-2) (Lysosome-associated membrane protein 2) (CD107 antigen-like family member B) (LGP-96) (CD antigen CD107b)	LAMP2	P13473;B4E2S7;H0YCG2;B4DF49;B7Z2R9	sp|P13473|LAMP2_HUMAN Lysosome-associated membrane glycoprotein 2 OS=Homo sapiens OX=9606 GN=LAMP2 PE=1 SV=2;tr|B4E2S7|B4E2S7_HUMAN cDNA FLJ58780, highly similar to Homo sapiens lysosomal-associated membrane protein 2 (LAMP2), transcript variant LAMP2B, mR	5	4	4	1	1	2	3	2	3	3	4	2	1	1	2	3	2	3	3	4	2	15.1	15.1	44.96	410	0	112.74	4.6	2.4	7.1	12.7	7.1	9	9	15.1	7.1	0	42724000	24934000	111520000	144840000	206760000	216160000	190680000
544	P13535	Myosin-8 (Myosin heavy chain 8) (Myosin heavy chain, skeletal muscle, perinatal) (MyHC-perinatal)	MYH8	P13535	sp|P13535|MYH8_HUMAN Myosin-8 OS=Homo sapiens OX=9606 GN=MYH8 PE=1 SV=3	1	1	1	1	1	0	1	0	0	0	0	0	1	1	0	1	0	0	0	0	0	0.7	0.7	222.76	1937	1	-2	0.7	0.7	0	0.7	0	0	0	0	0	22568000	23236000	0	4555600	0	0	0	0
546	P14415	Sodium/potassium-transporting ATPase subunit beta-2 (Adhesion molecule in glia) (AMOG) (Sodium/potassium-dependent ATPase subunit beta-2)	ATP1B2	P14415;I3L1V9;I3L3J8	sp|P14415|AT1B2_HUMAN Sodium/potassium-transporting ATPase subunit beta-2 OS=Homo sapiens OX=9606 GN=ATP1B2 PE=1 SV=3;tr|I3L1V9|I3L1V9_HUMAN Sodium/potassium-transporting ATPase subunit beta (Fragment) OS=Homo sapiens OX=9606 GN=ATP1B2 PE=1 SV=8;tr|I3L3J8|	3	2	2	0	0	0	1	1	0	2	2	2	0	0	0	1	1	0	2	2	2	9.7	9.7	33.367	290	0	33.026	0	0	0	5.2	5.2	0	9.7	9.7	9.7	0	0	0	5613700	0	0	0	4411900
548	P16112	Aggrecan core protein (Cartilage-specific proteoglycan core protein) (CSPCP) (Chondroitin sulfate proteoglycan core protein 1) (Chondroitin sulfate proteoglycan 1) [Cleaved into: Aggrecan core protein 2]	ACAN AGC1 CSPG1 MSK16	P16112	sp|P16112|PGCA_HUMAN Aggrecan core protein OS=Homo sapiens OX=9606 GN=ACAN PE=1 SV=3	1	32	1	20	19	25	17	8	7	15	21	18	0	0	0	0	0	0	0	1	0	18.3	1.3	261.33	2530	0	34.033	13.4	11.3	14.7	11	4.1	3.9	11.1	13.6	12.6	0	0	0	0	0	0	0	9985300
549	P19652	Alpha-1-acid glycoprotein 2 (AGP 2) (Orosomucoid-2) (OMD 2)	ORM2 AGP2	P19652	sp|P19652|A1AG2_HUMAN Alpha-1-acid glycoprotein 2 OS=Homo sapiens OX=9606 GN=ORM2 PE=1 SV=2	1	1	1	0	1	1	1	1	1	1	1	1	0	1	1	1	1	1	1	1	1	7.5	7.5	23.602	201	0	252.67	0	7.5	7.5	7.5	7.5	7.5	7.5	7.5	7.5	0	194260000	118760000	134090000	59800000	91932000	275880000	482560000
494	P20702	Integrin alpha-X (CD11 antigen-like family member C) (Leu M5) (Leukocyte adhesion glycoprotein p150,95 alpha chain) (Leukocyte adhesion receptor p150,95) (CD antigen CD11c)	ITGAX CD11C	P20702;H3BN02;Q8TES5	sp|P20702|ITAX_HUMAN Integrin alpha-X OS=Homo sapiens OX=9606 GN=ITGAX PE=1 SV=3;tr|H3BN02|H3BN02_HUMAN Integrin alpha-X OS=Homo sapiens OX=9606 GN=ITGAX PE=1 SV=1;tr|Q8TES5|Q8TES5_HUMAN FLJ00114 protein (Fragment) OS=Homo sapiens OX=9606 GN=FLJ00114 PE=2	3	2	2	0	0	0	1	0	0	0	0	1	0	0	0	1	0	0	0	0	1	2.7	2.7	127.83	1163	0	2.6062	0	0	0	0.9	0	0	0	0	1.8	0	0	0	5956000	0	0	0	0
550	P22792	Carboxypeptidase N subunit 2 (Carboxypeptidase N 83 kDa chain) (Carboxypeptidase N large subunit) (Carboxypeptidase N polypeptide 2) (Carboxypeptidase N regulatory subunit)	CPN2 ACBP	P22792	sp|P22792|CPN2_HUMAN Carboxypeptidase N subunit 2 OS=Homo sapiens OX=9606 GN=CPN2 PE=1 SV=3	1	1	1	0	0	0	1	0	0	0	0	0	0	0	0	1	0	0	0	0	0	3.9	3.9	60.556	545	0	1.7608	0	0	0	3.9	0	0	0	0	0	0	0	0	10916000	0	0	0	0
551	P23142	Fibulin-1 (FIBL-1)	FBLN1 PP213	P23142;Q8NBH6;B4DUV1;B1AHL2	sp|P23142|FBLN1_HUMAN Fibulin-1 OS=Homo sapiens OX=9606 GN=FBLN1 PE=1 SV=4;tr|Q8NBH6|Q8NBH6_HUMAN Fibulin-1 OS=Homo sapiens OX=9606 PE=2 SV=1;tr|B4DUV1|B4DUV1_HUMAN Fibulin-1 OS=Homo sapiens OX=9606 PE=2 SV=1;tr|B1AHL2|B1AHL2_HUMAN Fibulin-1 OS=Homo sapien	10	3	3	1	2	1	1	1	1	2	1	1	1	2	1	1	1	1	2	1	1	8.5	8.5	77.213	703	0	175.53	2.4	6.5	2.4	2.4	2.4	2.4	4.4	2.4	2.4	159080000	609500000	30157000	430890000	112930000	476280000	2303500000	692710000
553	P24821	Tenascin (TN) (Cytotactin) (GMEM) (GP 150-225) (Glioma-associated-extracellular matrix antigen) (Hexabrachion) (JI) (Myotendinous antigen) (Neuronectin) (Tenascin-C) (TN-C)	TNC HXB	P24821;E9PC84;J3QSU6;A0A024R884;Q4LE33;A7MBN2;F5H7V9;D3YHM4	sp|P24821|TENA_HUMAN Tenascin OS=Homo sapiens OX=9606 GN=TNC PE=1 SV=3;tr|E9PC84|E9PC84_HUMAN Tenascin OS=Homo sapiens OX=9606 GN=TNC PE=1 SV=1;tr|J3QSU6|J3QSU6_HUMAN Tenascin OS=Homo sapiens OX=9606 GN=TNC PE=1 SV=1;tr|A0A024R884|A0A024R884_HUMAN Tenascin	11	29	29	3	6	2	23	11	12	14	23	15	3	6	2	23	11	12	14	23	15	26.3	26.3	240.85	2201	0	323.31	2.3	5.1	1.5	21.7	8.8	9.6	12	22.4	13.8	639550000	1151600000	121190000	24922000000	12205000000	14077000000	14867000000	14963000000
556	P27487	Dipeptidyl peptidase 4 (EC 3.4.14.5) (ADABP) (Adenosine deaminase complexing protein 2) (ADCP-2) (Dipeptidyl peptidase IV) (DPP IV) (T-cell activation antigen CD26) (TP103) (CD antigen CD26) [Cleaved into: Dipeptidyl peptidase 4 membrane form (Dipeptidyl peptidase IV membrane form); Dipeptidyl peptidase 4 soluble form (Dipeptidyl peptidase IV soluble form)]	DPP4 ADCP2 CD26	P27487	sp|P27487|DPP4_HUMAN Dipeptidyl peptidase 4 OS=Homo sapiens OX=9606 GN=DPP4 PE=1 SV=2	2	4	4	0	0	0	3	1	1	2	3	1	0	0	0	3	1	1	2	3	1	5.9	5.9	88.278	766	0	39.741	0	0	0	5.9	1.4	2.1	3.5	3.5	2.1	0	0	0	24282000	21132000	10752000	0	23959000
52	P29622	Kallistatin (Kallikrein inhibitor) (Peptidase inhibitor 4) (PI-4) (Serpin A4)	SERPINA4 KST PI4	P29622;A0A024R6I9;B2R815	sp|P29622|KAIN_HUMAN Kallistatin OS=Homo sapiens OX=9606 GN=SERPINA4 PE=1 SV=3;tr|A0A024R6I9|A0A024R6I9_HUMAN Serpin peptidase inhibitor, clade A (Alpha-1 antiproteinase, antitrypsin), member 4, isoform CRA_a OS=Homo sapiens OX=9606 GN=SERPINA4 PE=2 SV=1;t	3	3	3	2	2	1	2	0	2	3	3	3	2	2	1	2	0	2	3	3	3	10.3	10.3	48.541	427	0	238.71	5.4	7.7	2.8	7.7	0	5.4	10.3	10.3	10.3	12711000	89516000	16732000	95850000	0	14727000	82704000	137520000
557	P33908	Mannosyl-oligosaccharide 1,2-alpha-mannosidase IA (EC 3.2.1.113) (Man(9)-alpha-mannosidase) (Man9-mannosidase) (Mannosidase alpha class 1A member 1) (Processing alpha-1,2-mannosidase IA) (Alpha-1,2-mannosidase IA)	MAN1A1	P33908	sp|P33908|MA1A1_HUMAN Mannosyl-oligosaccharide 1,2-alpha-mannosidase IA OS=Homo sapiens OX=9606 GN=MAN1A1 PE=1 SV=3	1	1	1	0	1	0	0	1	0	0	0	0	0	1	0	0	1	0	0	0	0	1.2	1.2	72.968	653	1	-2	0	1.2	0	0	1.2	0	0	0	0	0	13467000	0	0	7738200	0	0	0
262	P35442	Thrombospondin-2	THBS2 TSP2	P35442;A0A3B3ITK0;Q6MZL6	sp|P35442|TSP2_HUMAN Thrombospondin-2 OS=Homo sapiens OX=9606 GN=THBS2 PE=1 SV=2;tr|A0A3B3ITK0|A0A3B3ITK0_HUMAN Thrombospondin-2 OS=Homo sapiens OX=9606 GN=THBS2 PE=4 SV=1;tr|Q6MZL6|Q6MZL6_HUMAN Uncharacterized protein DKFZp686G02190 (Fragment) OS=Homo sap	3	2	2	1	1	1	2	1	1	1	1	1	1	1	1	2	1	1	1	1	1	2.7	2.7	129.99	1172	0	108.23	1.1	1.1	1.1	2.7	1.1	1.1	1.1	1.1	1.1	44946000	34579000	57663000	434770000	358670000	392490000	170680000	235710000
470	P35443	Thrombospondin-4	THBS4 TSP4	P35443;E7ES19;B7Z832	sp|P35443|TSP4_HUMAN Thrombospondin-4 OS=Homo sapiens OX=9606 GN=THBS4 PE=1 SV=2;tr|E7ES19|E7ES19_HUMAN Thrombospondin-4 OS=Homo sapiens OX=9606 GN=THBS4 PE=1 SV=1;tr|B7Z832|B7Z832_HUMAN cDNA FLJ51409, highly similar to Thrombospondin-4 OS=Homo sapiens OX=	3	6	4	2	1	2	1	0	0	2	3	4	2	1	1	1	0	0	1	1	3	12.8	10.1	105.87	961	0	260.22	3.5	2	3	2	0	0	3.6	4.7	10.2	122040000	227050000	147280000	92061000	0	0	138850000	150700000
560	P43652	Afamin (Alpha-albumin) (Alpha-Alb)	AFM ALB2 ALBA	P43652	sp|P43652|AFAM_HUMAN Afamin OS=Homo sapiens OX=9606 GN=AFM PE=1 SV=1	1	3	3	0	1	1	3	0	1	0	2	1	0	1	1	3	0	1	0	2	1	5.2	5.2	69.068	599	0	257.55	0	1.7	2	5.2	0	1.7	0	3.7	2	0	0	6962900	19030000	0	0	0	42836000
562	P47972	Neuronal pentraxin-2 (NP2) (Neuronal pentraxin II) (NP-II)	NPTX2	P47972	sp|P47972|NPTX2_HUMAN Neuronal pentraxin-2 OS=Homo sapiens OX=9606 GN=NPTX2 PE=1 SV=2	1	1	1	0	0	0	1	0	0	0	0	0	0	0	0	1	0	0	0	0	0	2.6	2.6	47.041	431	0.0018587	1.5121	0	0	0	2.6	0	0	0	0	0	0	0	0	1736000	0	0	0	0
248	P51884	Lumican (Keratan sulfate proteoglycan lumican) (KSPG lumican)	LUM LDC SLRR2D	P51884;A0A384N669;Q53FV4	sp|P51884|LUM_HUMAN Lumican OS=Homo sapiens OX=9606 GN=LUM PE=1 SV=2;tr|A0A384N669|A0A384N669_HUMAN Epididymis secretory sperm binding protein OS=Homo sapiens OX=9606 PE=2 SV=1;tr|Q53FV4|Q53FV4_HUMAN Lumican variant (Fragment) OS=Homo sapiens OX=9606 PE=2	3	13	10	6	6	8	7	6	6	11	12	11	4	4	6	5	4	4	8	9	8	58	43.2	38.429	338	0	323.31	31.7	31.7	37.9	35.8	31.7	31.7	50.3	54.7	50.3	18454000000	15044000000	10170000000	22824000000	79747000000	63170000000	23668000000	12275000000
563	P51888	Prolargin (Proline-arginine-rich end leucine-rich repeat protein)	PRELP SLRR2A	P51888;Q7Z4B2	sp|P51888|PRELP_HUMAN Prolargin OS=Homo sapiens OX=9606 GN=PRELP PE=1 SV=1;tr|Q7Z4B2|Q7Z4B2_HUMAN MSTP161 OS=Homo sapiens OX=9606 GN=MST161 PE=2 SV=1	2	13	2	11	10	10	9	8	9	9	10	9	1	2	1	1	1	1	1	1	1	49	8.9	43.809	382	0	323.31	46.9	41.4	43.5	39	35.9	39	37.4	43.5	40.3	98303000000	111380000000	90102000000	15633000000	53178000000	42306000000	46355000000	43714000000
566	P80108	Phosphatidylinositol-glycan-specific phospholipase D (PI-G PLD) (EC 3.1.4.50) (Glycoprotein phospholipase D) (Glycosyl-phosphatidylinositol-specific phospholipase D) (GPI-PLD) (GPI-specific phospholipase D)	GPLD1 PIGPLD1	P80108	sp|P80108|PHLD_HUMAN Phosphatidylinositol-glycan-specific phospholipase D OS=Homo sapiens OX=9606 GN=GPLD1 PE=1 SV=3	1	1	1	0	1	1	0	0	0	0	0	0	0	1	1	0	0	0	0	0	0	0.8	0.8	92.335	840	1	-2	0	0.8	0.8	0	0	0	0	0	0	0	0	19735000	0	0	0	0	0
567	P82987	ADAMTS-like protein 3 (ADAMTSL-3) (Punctin-2)	ADAMTSL3 KIAA1233	P82987	sp|P82987|ATL3_HUMAN ADAMTS-like protein 3 OS=Homo sapiens OX=9606 GN=ADAMTSL3 PE=1 SV=4	1	5	5	3	3	3	2	0	1	2	3	2	3	3	3	2	0	1	2	3	2	3.4	3.4	188.69	1691	0	82.901	1.8	1.8	1.8	1.2	0	0.7	1.4	2.3	1.4	84924000	154140000	98936000	11703000	0	0	60956000	39663000
568	P98161	Polycystin-1 (PC1) (Autosomal dominant polycystic kidney disease 1 protein)	PKD1	P98161;Q15142	sp|P98161|PKD1_HUMAN Polycystin-1 OS=Homo sapiens OX=9606 GN=PKD1 PE=1 SV=3;tr|Q15142|Q15142_HUMAN Polycystic kidney disease-associated protein OS=Homo sapiens OX=9606 GN=PKD1 PE=4 SV=1	4	3	3	1	1	1	0	0	0	0	0	0	1	1	1	0	0	0	0	0	0	0.8	0.8	462.52	4303	0.0036765	1.3876	0.3	0.3	0.2	0	0	0	0	0	0	0	0	5794900	0	0	0	0	0
569	Q02388	Collagen alpha-1(VII) chain (Long-chain collagen) (LC collagen)	COL7A1	Q02388	sp|Q02388|CO7A1_HUMAN Collagen alpha-1(VII) chain OS=Homo sapiens OX=9606 GN=COL7A1 PE=1 SV=2	1	1	1	0	0	0	1	0	1	0	0	0	0	0	0	1	0	1	0	0	0	0.4	0.4	295.22	2944	0.0052632	1.1157	0	0	0	0.4	0	0.4	0	0	0	0	0	0	5904900	0	7313100	0	0
570	Q02413	Desmoglein-1 (Cadherin family member 4) (Desmosomal glycoprotein 1) (DG1) (DGI) (Pemphigus foliaceus antigen)	DSG1 CDHF4	Q02413	sp|Q02413|DSG1_HUMAN Desmoglein-1 OS=Homo sapiens OX=9606 GN=DSG1 PE=1 SV=2	1	1	1	1	0	1	0	0	0	1	0	1	1	0	1	0	0	0	1	0	1	1.1	1.1	113.75	1049	0	6.7945	1.1	0	1.1	0	0	0	1.1	0	1.1	6458800	0	6314000	0	0	0	32319000	0
571	Q03591	Complement factor H-related protein 1 (FHR-1) (H factor-like protein 1) (H-factor-like 1) (H36)	CFHR1 CFHL CFHL1 CFHL1P CFHR1P FHR1 HFL1 HFL2	Q03591;A0A3B3IRW0;A0A3B3IS00;V9GYE7;B1AKG0;A0A3B3IQ51;P36980	sp|Q03591|FHR1_HUMAN Complement factor H-related protein 1 OS=Homo sapiens OX=9606 GN=CFHR1 PE=1 SV=2;tr|A0A3B3IRW0|A0A3B3IRW0_HUMAN Complement factor H-related protein 2 OS=Homo sapiens OX=9606 GN=CFHR2 PE=4 SV=1;tr|A0A3B3IS00|A0A3B3IS00_HUMAN Complement	7	2	1	1	1	1	2	1	1	1	1	1	1	1	1	1	1	1	1	1	1	11.5	3.9	37.65	330	0	91.491	3.9	3.9	3.9	11.5	3.9	3.9	3.9	3.9	3.9	15699000	124240000	121560000	365920000	51412000	103190000	375180000	284450000
572	Q05707	Collagen alpha-1(XIV) chain (Undulin)	COL14A1 UND	Q05707;Q4G0W3;A0A0A0MQT7;A8KAL5	sp|Q05707|COEA1_HUMAN Collagen alpha-1(XIV) chain OS=Homo sapiens OX=9606 GN=COL14A1 PE=1 SV=3;tr|Q4G0W3|Q4G0W3_HUMAN COL14A1 protein OS=Homo sapiens OX=9606 GN=COL14A1 PE=1 SV=1;tr|A0A0A0MQT7|A0A0A0MQT7_HUMAN Collagen alpha-1(XIV) chain OS=Homo sapiens OX	6	4	4	0	2	2	2	3	3	2	3	2	0	2	2	2	3	3	2	3	2	3.6	3.6	193.51	1796	0	289.49	0	1.8	1.8	1.8	2.6	2.8	1.8	2.6	1.8	0	51679000	54250000	1853700000	238620000	855670000	531070000	1305900000
403	Q05CF8	KNG1 protein	KNG1	Q05CF8;D3DNU8;B4E1C2	tr|Q05CF8|Q05CF8_HUMAN KNG1 protein OS=Homo sapiens OX=9606 GN=KNG1 PE=2 SV=1;tr|D3DNU8|D3DNU8_HUMAN Kininogen 1, isoform CRA_a OS=Homo sapiens OX=9606 GN=KNG1 PE=4 SV=1;tr|B4E1C2|B4E1C2_HUMAN Kininogen 1, isoform CRA_b OS=Homo sapiens OX=9606 GN=KNG1 PE=2	3	3	1	2	3	2	3	2	3	3	3	3	0	1	1	1	0	1	1	1	1	15.8	7.6	33.055	291	0	323.31	8.2	15.8	11.7	15.8	8.2	15.8	15.8	15.8	15.8	18437000	137320000	75203000	151080000	108330000	196400000	122710000	170470000
507	Q05DA4	p4HA2 protein	P4HA2	Q05DA4;Q5HYD8;O15460	tr|Q05DA4|Q05DA4_HUMAN p4HA2 protein OS=Homo sapiens OX=9606 GN=P4HA2 PE=2 SV=1;tr|Q5HYD8|Q5HYD8_HUMAN Uncharacterized protein DKFZp686M0919 OS=Homo sapiens OX=9606 GN=DKFZp686M0919 PE=2 SV=1;sp|O15460|P4HA2_HUMAN Prolyl 4-hydroxylase subunit alpha-2 OS=Ho	3	1	1	1	0	1	1	0	0	1	0	1	1	0	1	1	0	0	1	0	1	5.4	5.4	57.377	504	0	254.45	5.4	0	5.4	5.4	0	0	5.4	0	5.4	21226000	0	7572500	30262000	0	0	15921000	0
573	Q05DB4	HEBP2 protein (Fragment)	HEBP2	Q05DB4;Q9Y5Z4	tr|Q05DB4|Q05DB4_HUMAN HEBP2 protein (Fragment) OS=Homo sapiens OX=9606 GN=HEBP2 PE=2 SV=1;sp|Q9Y5Z4|HEBP2_HUMAN Heme-binding protein 2 OS=Homo sapiens OX=9606 GN=HEBP2 PE=1 SV=1	2	1	1	0	1	0	0	0	0	0	0	0	0	1	0	0	0	0	0	0	0	6.1	6.1	24.029	214	1	-2	0	6.1	0	0	0	0	0	0	0	0	8487500000	0	0	0	0	0	0
575	Q07954	Prolow-density lipoprotein receptor-related protein 1 (LRP-1) (Alpha-2-macroglobulin receptor) (A2MR) (Apolipoprotein E receptor) (APOER) (CD antigen CD91) [Cleaved into: Low-density lipoprotein receptor-related protein 1 85 kDa subunit (LRP-85); Low-density lipoprotein receptor-related protein 1 515 kDa subunit (LRP-515); Low-density lipoprotein receptor-related protein 1 intracellular domain (L…	LRP1 A2MR APR	Q07954;Q59FG2	sp|Q07954|LRP1_HUMAN Prolow-density lipoprotein receptor-related protein 1 OS=Homo sapiens OX=9606 GN=LRP1 PE=1 SV=2;tr|Q59FG2|Q59FG2_HUMAN Low density lipoprotein-related protein 1 variant (Fragment) OS=Homo sapiens OX=9606 PE=2 SV=1	5	25	25	11	17	13	24	17	17	16	20	16	11	17	13	24	17	17	16	20	16	7.3	7.3	504.6	4544	0	323.31	3.1	5	3.8	6.8	5	5.2	4.3	5.9	4.3	492100000	540810000	432900000	1339900000	929000000	801110000	1344200000	1383900000
576	Q0PNF2	FEX1		Q0PNF2;Q9NY15	tr|Q0PNF2|Q0PNF2_HUMAN FEX1 OS=Homo sapiens OX=9606 PE=2 SV=1;sp|Q9NY15|STAB1_HUMAN Stabilin-1 OS=Homo sapiens OX=9606 GN=STAB1 PE=1 SV=3	2	3	3	0	0	0	3	0	1	0	1	0	0	0	0	3	0	1	0	1	0	2	2	275.44	2570	0	15.139	0	0	0	2	0	0.5	0	0.7	0	0	0	0	29862000	0	0	0	31656000
577	Q12797	Aspartyl/asparaginyl beta-hydroxylase (EC 1.14.11.16) (Aspartate beta-hydroxylase) (ASP beta-hydroxylase) (Peptide-aspartate beta-dioxygenase)	ASPH BAH	Q12797;A0A087WUJ2;E5RG29;B7ZM96;B4DQ07;Q6PJH4;A8K721;E5RG56;B3GQE5;B8Y0L3	sp|Q12797|ASPH_HUMAN Aspartyl/asparaginyl beta-hydroxylase OS=Homo sapiens OX=9606 GN=ASPH PE=1 SV=3;tr|A0A087WUJ2|A0A087WUJ2_HUMAN Aspartyl/asparaginyl beta-hydroxylase (Fragment) OS=Homo sapiens OX=9606 GN=ASPH PE=1 SV=1;tr|E5RG29|E5RG29_HUMAN Aspartyl/a	10	2	2	1	1	1	2	1	1	1	1	1	1	1	1	2	1	1	1	1	1	6.3	6.3	85.862	758	0	13.682	1.6	1.6	1.6	6.3	1.6	1.6	1.6	1.6	1.6	19958000	16404000	19783000	80993000	0	0	72939000	77807000
65	Q13219	Pappalysin-1 (EC 3.4.24.79) (Insulin-like growth factor-dependent IGF-binding protein 4 protease) (IGF-dependent IGFBP-4 protease) (IGFBP-4ase) (Pregnancy-associated plasma protein A) (PAPP-A)	PAPPA	Q13219;A0A024R842;B4DTA7	sp|Q13219|PAPP1_HUMAN Pappalysin-1 OS=Homo sapiens OX=9606 GN=PAPPA PE=1 SV=3;tr|A0A024R842|A0A024R842_HUMAN Pregnancy-associated plasma protein A, pappalysin 1, isoform CRA_b OS=Homo sapiens OX=9606 GN=PAPPA PE=4 SV=1;tr|B4DTA7|B4DTA7_HUMAN cDNA FLJ50207,	3	2	2	0	0	0	2	0	0	0	0	0	0	0	0	2	0	0	0	0	0	3.1	3.1	180.97	1627	0	4.394	0	0	0	3.1	0	0	0	0	0	0	0	0	6425900	0	0	0	0
579	Q13433	Zinc transporter ZIP6 (Estrogen-regulated protein LIV-1) (Solute carrier family 39 member 6) (Zrt- and Irt-like protein 6) (ZIP-6)	SLC39A6 LIV1 ZIP6	Q13433	sp|Q13433|S39A6_HUMAN Zinc transporter ZIP6 OS=Homo sapiens OX=9606 GN=SLC39A6 PE=1 SV=3	1	3	3	1	0	0	1	0	0	1	1	0	1	0	0	1	0	0	1	1	0	3	3	85.046	755	0	10.793	1.7	0	0	1.7	0	0	1.3	1.2	0	0	0	0	5916500	0	0	0	0
580	Q13641	Trophoblast glycoprotein (5T4 oncofetal antigen) (5T4 oncofetal trophoblast glycoprotein) (5T4 oncotrophoblast glycoprotein) (M6P1) (Wnt-activated inhibitory factor 1) (WAIF1)	TPBG 5T4	Q13641	sp|Q13641|TPBG_HUMAN Trophoblast glycoprotein OS=Homo sapiens OX=9606 GN=TPBG PE=1 SV=1	1	4	4	0	0	0	2	1	0	2	3	2	0	0	0	2	1	0	2	3	2	15	15	46.031	420	0	7.9171	0	0	0	7.1	3.8	0	7.9	11.7	7.9	0	0	0	0	0	0	21190000	16842000
582	Q14766	Latent-transforming growth factor beta-binding protein 1 (LTBP-1) (Transforming growth factor beta-1-binding protein 1) (TGF-beta1-BP-1)	LTBP1	Q14766;C9JD84;E7EV71;B7ZLY3;H7C0I7;B4DRF7;B4DZD1;B4DNR7;B4DST8	sp|Q14766|LTBP1_HUMAN Latent-transforming growth factor beta-binding protein 1 OS=Homo sapiens OX=9606 GN=LTBP1 PE=1 SV=4;tr|C9JD84|C9JD84_HUMAN Latent-transforming growth factor beta-binding protein 1 OS=Homo sapiens OX=9606 GN=LTBP1 PE=1 SV=1;tr|E7EV71|E	9	4	4	2	2	3	3	0	0	1	2	1	2	2	3	3	0	0	1	2	1	3.7	3.7	186.79	1721	0	104.48	2.4	2.4	3.7	2.7	0	0	1.3	2.4	1	52682000	44039000	37493000	38223000	0	0	25870000	23747000
298	Q14CE1	GPR64 protein	GPR64	Q14CE1;A8K4P7;Q8IZP9;Q8NF77;Q499H0	tr|Q14CE1|Q14CE1_HUMAN GPR64 protein OS=Homo sapiens OX=9606 GN=GPR64 PE=2 SV=1;tr|A8K4P7|A8K4P7_HUMAN cDNA FLJ77493, highly similar to Homo sapiens G protein-coupled receptor 64 (GPR64), mRNA OS=Homo sapiens OX=9606 PE=2 SV=1;sp|Q8IZP9|AGRG2_HUMAN Adhesio	5	2	2	0	1	0	0	0	0	1	1	1	0	1	0	0	0	0	1	1	1	3.8	3.8	104.81	950	0	3.4283	0	1.2	0	0	0	0	1.2	2.6	2.6	0	0	0	0	0	0	0	5585900
584	Q15198	Platelet-derived growth factor receptor-like protein (PDGFR-like protein) (PDGF receptor beta-like tumor suppressor)	PDGFRL PRLTS	Q15198	sp|Q15198|PGFRL_HUMAN Platelet-derived growth factor receptor-like protein OS=Homo sapiens OX=9606 GN=PDGFRL PE=1 SV=1	1	1	1	1	1	1	1	0	1	1	1	1	1	1	1	1	0	1	1	1	1	3.7	3.7	41.86	375	0	3.8483	3.7	3.7	3.7	3.7	0	3.7	3.7	3.7	3.7	29449000	67881000	64964000	48787000	0	0	89471000	58576000
194	Q16610	Extracellular matrix protein 1 (Secretory component p85)	ECM1	Q16610;A0A140VJI7;C8CHS3	sp|Q16610|ECM1_HUMAN Extracellular matrix protein 1 OS=Homo sapiens OX=9606 GN=ECM1 PE=1 SV=2;tr|A0A140VJI7|A0A140VJI7_HUMAN Testicular tissue protein Li 61 OS=Homo sapiens OX=9606 PE=2 SV=1;tr|C8CHS3|C8CHS3_HUMAN Truncated extracellular matrix protein 1 O	3	2	2	0	1	1	2	1	1	2	2	1	0	1	1	2	1	1	2	2	1	4.1	4.1	60.673	540	0	6.2291	0	2.2	2.2	4.1	2.2	2.2	4.1	4.1	2.2	0	38734000	8332800	74963000	36997000	93028000	40493000	87299000
587	Q16853	Membrane primary amine oxidase (EC 1.4.3.21) (Copper amine oxidase) (HPAO) (Semicarbazide-sensitive amine oxidase) (SSAO) (Vascular adhesion protein 1) (VAP-1)	AOC3 VAP1	Q16853;K7EQZ5;K7EL47	sp|Q16853|AOC3_HUMAN Membrane primary amine oxidase OS=Homo sapiens OX=9606 GN=AOC3 PE=1 SV=3;tr|K7EQZ5|K7EQZ5_HUMAN Amine oxidase (Fragment) OS=Homo sapiens OX=9606 GN=AOC3 PE=1 SV=1;tr|K7EL47|K7EL47_HUMAN Amine oxidase (Fragment) OS=Homo sapiens OX=9606	3	2	2	0	0	0	2	1	0	1	1	2	0	0	0	2	1	0	1	1	2	4.2	4.2	84.621	763	0	4.5751	0	0	0	4.2	1.4	0	1.4	1.4	4.2	0	0	0	20887000	35288000	0	38586000	50973000
157	Q29834	HLA-DRB1*1605 protein (Fragment)	HLA-DRB1*1605	Q29834;A0A288R112;A0A288QFE1;R9WVY2;Q9TQ60;Q95IE2;Q7YQ35;A0A0K0KRE1;A0A1X9I4V1;D6CJD7;C8C9V9;A0A2H4G4C7;S0F159;A0A0K0KRF2;A0A2H4G493;A0A2H4FZS7;A0A2H4FZR6;A0A2H4FZR4;A0A288R1P4;A0A288QRZ9;C0MP10;A0A288QFF2;S0F0N0;S0F2D3;A0A141AZJ2;D6PZZ4;D6PZZ0;S0F2K5;G9HRQ2;D1GZJ1;A0A0K0KRE7;F8SY56;F4NBL4;E1V2J5;A0A0K0KRE8;A0A0K0KRE4;S0F3I7;A0A0K0KRQ1;A0A0K0KRE3;A0A0K0KRE2;Q45FY1;U6EFX2;A0A0A8R917;A0A0K0KRD8;S5U…	tr|Q29834|Q29834_HUMAN HLA-DRB1*1605 protein (Fragment) OS=Homo sapiens OX=9606 GN=HLA-DRB1*1605 PE=4 SV=1;tr|A0A288R112|A0A288R112_HUMAN MHC class II antigen (Fragment) OS=Homo sapiens OX=9606 GN=HLA-DRB1 PE=4 SV=1;tr|A0A288QFE1|A0A288QFE1_HUMAN MHC class	188	1	1	0	0	0	0	0	1	0	0	0	0	0	0	0	0	1	0	0	0	12.5	12.5	8.6343	72	1	-2	0	0	0	0	0	12.5	0	0	0	0	0	0	0	0	16626000	0	0
107	Q29900	HLA-DR (Fragment)		Q29900;A0A0A7C769;A0A0A7C767;J7JLT4;A0A0A7C7I5;A0A0A7C7J6;A0A0A7C7L9;A0A0A7C7N9;A0A0A7C7C6;K7WRG9;L0BXP7;L0BX77;L0BX82;L0BX86;L0BX94;L0BX97;L0BXL3;L0BXN0;I7H3Z5;L0BXN3;L0BX28;A0A0A7C7N5;K7R1Q4;A0A0A7C7T1;A0A0A7C7T6;A0A0A7C7T7;A0A0A7C7Q6;A0A0A7C7G6;A0A0A7C7Q5;A0A0A7C7E0;I7EL85;A0A0A7C7H3;A0A0A7C798;A0A0A7C786;A0A0A7C782;A0A0A7C780;A0A0A7C775;I6X987;A0A0A7C7H9;L0BXQ0;F8LFY8;K7X4E3;L0BVU4;A0A0A7C7U1…	tr|Q29900|Q29900_HUMAN HLA-DR (Fragment) OS=Homo sapiens OX=9606 PE=2 SV=1;tr|A0A0A7C769|A0A0A7C769_HUMAN MHC class II antigen (Fragment) OS=Homo sapiens OX=9606 GN=HLA-DQB1 PE=4 SV=1;tr|A0A0A7C767|A0A0A7C767_HUMAN MHC class II antigen (Fragment) OS=Homo s	1271	1	1	0	0	0	1	0	1	0	0	0	0	0	0	1	0	1	0	0	0	26.2	26.2	5.0676	42	0.0053667	1.2405	0	0	0	26.2	0	26.2	0	0	0	0	0	0	6627000	0	7412300	0	0
4	Q2HQJ5	MHC class I antigen (Fragment)	HLA-A	Q2HQJ5;G9HW33;G1EPD4;G1EPD9;G1EPF2;G1EPG8;G1EPH1;G1EP13;G0KXG7;G1EPB0;G1EP04;F6KRP5;F8R100;F8R109;F8R111;F8R124;F8R128;F8R132;F8R133;F6KRP3;F8R8G5;G1EPB9;F8R8G4;G1EPA8;G1EP81;G9HW61;G9HW66;G9HW71;G9HW77;G9I2I9;G9I2J4;G1EPH3;G1EPA6;G1EPA5;G1EPA1;G1EP84;G1EP86;G1EP87;G1EP90;G1EP91;G1EP92;G1EP94;G1EPG9;F8R8I5;F8R8I8;F8SKT2;F2X614;F6KRL0;F6KRL2;F6KRL3;F6KRL5;F6KRM0;F6KRN0;F2X606;F2X5Z7;F2X5Y6;F2X5Z8;…	tr|Q2HQJ5|Q2HQJ5_HUMAN MHC class I antigen (Fragment) OS=Homo sapiens OX=9606 GN=HLA-A PE=3 SV=1;tr|G9HW33|G9HW33_HUMAN MHC class I antigen (Fragment) OS=Homo sapiens OX=9606 GN=HLA-A PE=3 SV=1;tr|G1EPD4|G1EPD4_HUMAN MHC class I antigen (Fragment) OS=Homo	1422	1	1	1	0	1	1	1	1	1	0	1	1	0	1	1	1	1	1	0	1	13.2	13.2	13.282	114	0	226.07	13.2	0	13.2	13.2	13.2	13.2	13.2	0	13.2	11402000	0	13916000	91561000	121090000	20535000	9871300	0
588	Q2TA85	C10orf54 protein (Fragment)	C10orf54	Q2TA85;Q9H7M9	tr|Q2TA85|Q2TA85_HUMAN C10orf54 protein (Fragment) OS=Homo sapiens OX=9606 GN=C10orf54 PE=2 SV=1;sp|Q9H7M9|VISTA_HUMAN V-type immunoglobulin domain-containing suppressor of T-cell activation OS=Homo sapiens OX=9606 GN=VSIR PE=1 SV=3	2	1	1	0	0	0	1	0	0	0	0	0	0	0	0	1	0	0	0	0	0	5.9	5.9	33.62	307	0	6.2269	0	0	0	5.9	0	0	0	0	0	0	0	0	4660500	0	0	0	0
3	Q31639	DRB1 transplantation antigen (Fragment)	HLA-DRB1	Q31639;F2VNU9;F2VNV1;F2VNV2;F2VNW0;F2VNW3;F2VNW4;F2X650;F2X651;F4NBK5;F4NBM0;F4NBM1;E9NVH6;H8WV70;H8WV71;H8WV72;Q5U9D1;Q5XWD6;F1CCN8;F2VNV0;A0A0G2R120;Q6S5I0;A0A0A7C4W1;F4NBM2;D9U3I0;A0A141AZJ6;E0X9N0;E1U685;E1U687;E2D5U2;E2D5U9;E2DHB9;E2GJP1;E3SGD3;E3SGD6;E3SWP6;E3SWQ7;E7D850;F4NBM3;A0A0K0KRS0;L0BVW1;Q860Y8;H8WV56;U5IQJ3;V5JAP2;V5TG83;W0HE86;R4S4G5;Q5DUF5;Q59HP9;Q546B9;I0J8R2;I1V1W8;I2CSG7;I6NN6…	tr|Q31639|Q31639_HUMAN DRB1 transplantation antigen (Fragment) OS=Homo sapiens OX=9606 GN=HLA-DRB1 PE=4 SV=1;tr|F2VNU9|F2VNU9_HUMAN MHC class II antigen (Fragment) OS=Homo sapiens OX=9606 GN=HLA-DRB1 PE=4 SV=1;tr|F2VNV1|F2VNV1_HUMAN MHC class II antigen (F	334	1	1	0	0	0	1	1	0	0	0	0	0	0	0	1	1	0	0	0	0	15.1	15.1	8.8416	73	0.0018622	1.5144	0	0	0	15.1	15.1	0	0	0	0	0	0	0	50369000	0	0	0	0
589	Q3B7K3	IKIP protein (Fragment)	IKIP	Q3B7K3;Q70UQ0	tr|Q3B7K3|Q3B7K3_HUMAN IKIP protein (Fragment) OS=Homo sapiens OX=9606 GN=IKIP PE=2 SV=1;sp|Q70UQ0|IKIP_HUMAN Inhibitor of nuclear factor kappa-B kinase-interacting protein OS=Homo sapiens OX=9606 GN=IKBIP PE=1 SV=1	2	2	2	0	0	0	2	1	1	0	2	1	0	0	0	2	1	1	0	2	1	10.9	10.9	30.367	267	0	323.31	0	0	0	10.9	4.5	4.5	0	10.9	4.5	0	0	0	12620000	16635000	10487000	0	13952000
591	Q3SY74	Protocadherin gamma subfamily B, 1	PCDHGB1	Q3SY74;Q9Y5G0;Q9UN71;Q9Y5G3;Q9Y5F8;Q9Y5G2	tr|Q3SY74|Q3SY74_HUMAN Protocadherin gamma subfamily B, 1 OS=Homo sapiens OX=9606 GN=PCDHGB1 PE=2 SV=1;sp|Q9Y5G0|PCDGH_HUMAN Protocadherin gamma-B5 OS=Homo sapiens OX=9606 GN=PCDHGB5 PE=2 SV=1;sp|Q9UN71|PCDGG_HUMAN Protocadherin gamma-B4 OS=Homo sapiens OX	6	1	1	0	0	0	1	0	0	0	0	1	0	0	0	1	0	0	0	0	1	1.7	1.7	88.239	810	0.005425	1.2981	0	0	0	1.7	0	0	0	0	1.7	0	0	0	4844100	0	0	0	0
417	Q49A61	MST1 protein	MST1	Q49A61;B7Z557;B7Z250;Q13208;Q53GN8;G3XAK1;P26927	tr|Q49A61|Q49A61_HUMAN MST1 protein OS=Homo sapiens OX=9606 GN=MST1 PE=2 SV=1;tr|B7Z557|B7Z557_HUMAN cDNA FLJ53076, highly similar to Hepatocyte growth factor-like protein OS=Homo sapiens OX=9606 PE=2 SV=1;tr|B7Z250|B7Z250_HUMAN cDNA FLJ56324, highly simil	7	1	1	0	1	1	1	1	1	1	1	1	0	1	1	1	1	1	1	1	1	7.4	7.4	21.42	188	0	167.23	0	7.4	7.4	7.4	7.4	7.4	7.4	7.4	7.4	0	6131700	4204700	19169000	10266000	7278000	13547000	19955000
592	Q4AC94	C2 domain-containing protein 3	C2CD3	Q4AC94	sp|Q4AC94|C2CD3_HUMAN C2 domain-containing protein 3 OS=Homo sapiens OX=9606 GN=C2CD3 PE=1 SV=4	1	1	1	0	0	0	0	0	0	1	1	0	0	0	0	0	0	0	1	1	0	0.6	0.6	260.39	2353	0.0049669	0.77712	0	0	0	0	0	0	0.6	0.6	0	0	0	0	0	0	0	25607000	15354000
11	Q53FJ5	Prosaposin (Variant Gaucher disease and variant metachromatic leukodystrophy) variant (Fragment)		Q53FJ5;A0A024QZQ2;C9JIZ6;B4DRB7;Q59EN5;P07602;B4DEK5	tr|Q53FJ5|Q53FJ5_HUMAN Prosaposin (Variant Gaucher disease and variant metachromatic leukodystrophy) variant (Fragment) OS=Homo sapiens OX=9606 PE=2 SV=1;tr|A0A024QZQ2|A0A024QZQ2_HUMAN Prosaposin (Variant Gaucher disease and variant metachromatic leukodyst	8	5	5	1	0	0	3	1	1	2	2	3	1	0	0	3	1	1	2	2	3	12	12	58.14	524	0	102.74	4.8	0	0	8.2	2.7	2.7	5.3	5.3	7.1	0	0	0	17182000	42566000	17748000	23009000	30995000
593	Q53FR6	Cartilage oligomeric matrix protein variant (Fragment)		Q53FR6	tr|Q53FR6|Q53FR6_HUMAN Cartilage oligomeric matrix protein variant (Fragment) OS=Homo sapiens OX=9606 PE=2 SV=1	1	26	1	4	6	13	8	2	2	11	17	14	0	0	0	0	0	0	0	1	0	48.9	4.2	82.774	757	0.00369	1.4025	10.6	13.1	24	18.6	5.8	5.8	23.2	38.8	29.5	0	0	0	0	0	0	0	0
66	Q53FU0	Carbohydrate sulfotransferase (EC 2.8.2.-) (Fragment)		Q53FU0;Q53FS1;A0A024R860;Q9NRB3;C9J991	tr|Q53FU0|Q53FU0_HUMAN Carbohydrate sulfotransferase (Fragment) OS=Homo sapiens OX=9606 PE=2 SV=1;tr|Q53FS1|Q53FS1_HUMAN Carbohydrate sulfotransferase (Fragment) OS=Homo sapiens OX=9606 PE=2 SV=1;tr|A0A024R860|A0A024R860_HUMAN Carbohydrate sulfotransferase	5	2	2	2	1	2	1	1	1	1	1	1	2	1	2	1	1	1	1	1	1	6.5	6.5	48.442	414	0	24.204	6.5	3.1	6.5	3.1	3.1	3.1	3.1	3.1	3.1	43695000	62620000	68501000	6234800	18679000	12957000	0	38775000
276	Q53GD2	Fibrinogen-like 2 variant (Fragment)		Q53GD2;A4D1B8;Q14314	tr|Q53GD2|Q53GD2_HUMAN Fibrinogen-like 2 variant (Fragment) OS=Homo sapiens OX=9606 PE=2 SV=1;tr|A4D1B8|A4D1B8_HUMAN Fibrinogen-like 2 OS=Homo sapiens OX=9606 GN=FGL2 PE=2 SV=1;sp|Q14314|FGL2_HUMAN Fibroleukin OS=Homo sapiens OX=9606 GN=FGL2 PE=1 SV=1	3	2	2	0	1	0	2	2	2	1	1	2	0	1	0	2	2	2	1	1	2	5.5	5.5	50.268	439	0	3.6828	0	3.4	0	5.5	5.5	5.5	2.1	2.1	5.5	0	0	0	27142000	53780000	21599000	30846000	60911000
186	Q53GU8	Transforming growth factor, beta-induced, 68kDa variant (Fragment)		Q53GU8;A0A0S2Z4Q2;Q15582;H0Y8L3;A0A0S2Z4K6	tr|Q53GU8|Q53GU8_HUMAN Transforming growth factor, beta-induced, 68kDa variant (Fragment) OS=Homo sapiens OX=9606 PE=2 SV=1;tr|A0A0S2Z4Q2|A0A0S2Z4Q2_HUMAN Transforming growth factor beta-induced 68kDa isoform 1 (Fragment) OS=Homo sapiens OX=9606 GN=TGFBI P	9	5	5	0	0	0	3	1	2	0	2	0	0	0	0	3	1	2	0	2	0	12.2	12.2	74.65	683	0	63.584	0	0	0	7.6	2.6	5.4	0	4.5	0	0	0	0	11337000	44113000	30895000	0	0
355	Q53H91	Phospholipid transfer protein isoform a variant (Fragment)		Q53H91;B3KUE5;P55058	tr|Q53H91|Q53H91_HUMAN Phospholipid transfer protein isoform a variant (Fragment) OS=Homo sapiens OX=9606 PE=2 SV=1;tr|B3KUE5|B3KUE5_HUMAN Phospholipid transfer protein, isoform CRA_c OS=Homo sapiens OX=9606 GN=PLTP PE=2 SV=1;sp|P55058|PLTP_HUMAN Phospholi	3	2	2	1	1	1	2	2	2	2	2	2	1	1	1	2	2	2	2	2	2	4.9	4.9	54.707	493	0	188.05	2.4	2.4	2.4	4.9	4.9	4.9	4.9	4.9	4.9	51098000	102760000	36921000	165880000	79645000	130820000	200140000	92269000
321	Q53QN4	Uncharacterized protein FRZB (Fragment)	FRZB	Q53QN4;D9ZGF6;B2R6W4;Q92765	tr|Q53QN4|Q53QN4_HUMAN Uncharacterized protein FRZB (Fragment) OS=Homo sapiens OX=9606 GN=FRZB PE=4 SV=1;tr|D9ZGF6|D9ZGF6_HUMAN Frizzled-related protein OS=Homo sapiens OX=9606 GN=FRZB PE=4 SV=1;tr|B2R6W4|B2R6W4_HUMAN cDNA, FLJ93149, highly similar to Homo	4	1	1	0	1	1	1	0	0	1	1	1	0	1	1	1	0	0	1	1	1	5	5	17.322	159	0.0050167	0.81788	0	5	5	5	0	0	5	5	5	0	59803000	91799000	41111000	0	0	77443000	63606000
336	Q53RS1	Uncharacterized protein ADAM17 (Fragment)	ADAM17	Q53RS1;B2RNB2;P78536	tr|Q53RS1|Q53RS1_HUMAN Uncharacterized protein ADAM17 (Fragment) OS=Homo sapiens OX=9606 GN=ADAM17 PE=4 SV=1;tr|B2RNB2|B2RNB2_HUMAN ADAM metallopeptidase domain 17 OS=Homo sapiens OX=9606 GN=ADAM17 PE=2 SV=1;sp|P78536|ADA17_HUMAN Disintegrin and metallopro	3	2	2	0	0	0	2	0	0	0	0	0	0	0	0	2	0	0	0	0	0	5	5	60.375	543	0	23.096	0	0	0	5	0	0	0	0	0	0	0	0	1984000	0	0	0	0
594	Q58EX2	Protein sidekick-2	SDK2 KIAA1514	Q58EX2;H7C2P2	sp|Q58EX2|SDK2_HUMAN Protein sidekick-2 OS=Homo sapiens OX=9606 GN=SDK2 PE=1 SV=3;tr|H7C2P2|H7C2P2_HUMAN Protein sidekick-2 (Fragment) OS=Homo sapiens OX=9606 GN=SDK2 PE=1 SV=1	2	7	7	1	2	3	5	2	1	3	7	2	1	2	3	5	2	1	3	7	2	4.7	4.7	239.39	2172	0	171.53	0.4	0.8	1.8	2.8	1.1	0.6	1.9	4.7	1.1	14304000	31141000	23801000	20507000	24592000	21463000	61924000	75435000
326	Q59EE5	Tissue factor pathway inhibitor (Lipoprotein-associated coagulation inhibitor) variant (Fragment)		Q59EE5;C9JKV3;B2R8Y9;P10646	tr|Q59EE5|Q59EE5_HUMAN Tissue factor pathway inhibitor (Lipoprotein-associated coagulation inhibitor) variant (Fragment) OS=Homo sapiens OX=9606 PE=2 SV=1;tr|C9JKV3|C9JKV3_HUMAN Tissue factor pathway inhibitor (Fragment) OS=Homo sapiens OX=9606 GN=TFPI PE=	4	1	1	0	0	0	1	0	0	0	0	0	0	0	0	1	0	0	0	0	0	4	4	23.458	201	1	-2	0	0	0	4	0	0	0	0	0	0	0	0	3770000	0	0	0	0
484	Q59EE6	Latent transforming growth factor beta binding protein 2 variant (Fragment)		Q59EE6;G3V511;G3V3X5;Q6AZ94;Q14767	tr|Q59EE6|Q59EE6_HUMAN Latent transforming growth factor beta binding protein 2 variant (Fragment) OS=Homo sapiens OX=9606 PE=2 SV=1;tr|G3V511|G3V511_HUMAN Latent-transforming growth factor beta-binding protein 2 OS=Homo sapiens OX=9606 GN=LTBP2 PE=1 SV=1;	5	4	4	1	1	2	3	0	0	2	1	1	1	1	2	3	0	0	2	1	1	5.1	5.1	181.81	1700	0	259.51	1.4	1.4	3.2	3.2	0	0	2.1	1.4	1.4	133960000	95796000	95544000	366060000	0	0	203510000	188410000
69	Q59EE7	Pro-alpha-1 type V collagen variant (Fragment)		Q59EE7;B2ZZ86;A0A024R8E5;P20908	tr|Q59EE7|Q59EE7_HUMAN Pro-alpha-1 type V collagen variant (Fragment) OS=Homo sapiens OX=9606 PE=2 SV=1;tr|B2ZZ86|B2ZZ86_HUMAN Collagen type V alpha 1 OS=Homo sapiens OX=9606 GN=COL5A1 PE=2 SV=1;tr|A0A024R8E5|A0A024R8E5_HUMAN Collagen, type V, alpha 1, iso	6	3	3	0	0	0	3	0	0	1	1	2	0	0	0	3	0	0	1	1	2	1.5	1.5	178.51	1792	0	25.786	0	0	0	1.5	0	0	0.5	0.5	1.5	0	0	0	18277000	0	0	13974000	8451700
541	Q59EZ3	Insulin-like growth factor 2 receptor variant (Fragment)		Q59EZ3;P11717	tr|Q59EZ3|Q59EZ3_HUMAN Insulin-like growth factor 2 receptor variant (Fragment) OS=Homo sapiens OX=9606 PE=2 SV=1;sp|P11717|MPRI_HUMAN Cation-independent mannose-6-phosphate receptor OS=Homo sapiens OX=9606 GN=IGF2R PE=1 SV=3	2	6	6	0	0	0	3	0	0	1	3	1	0	0	0	3	0	0	1	3	1	3.6	3.6	266.11	2414	0	57.421	0	0	0	2.1	0	0	0.8	1.7	0.3	0	0	0	0	0	0	5108400	11376000
316	Q59F32	Myosin VIIA variant (Fragment)		Q59F32;H7C4D8;B0I1T3	tr|Q59F32|Q59F32_HUMAN Myosin VIIA variant (Fragment) OS=Homo sapiens OX=9606 PE=2 SV=1;tr|H7C4D8|H7C4D8_HUMAN Unconventional myosin-VIIa (Fragment) OS=Homo sapiens OX=9606 GN=MYO7A PE=1 SV=1;tr|B0I1T3|B0I1T3_HUMAN MYO7A variant protein (Fragment) OS=Homo	3	1	1	0	0	0	0	0	0	1	0	0	0	0	0	0	0	0	1	0	0	2.6	2.6	96.132	843	0.0050251	0.8252	0	0	0	0	0	0	2.6	0	0	0	0	0	0	0	0	72385000	0
283	Q59F71	Metalloendopeptidase (EC 3.4.24.-) (Fragment)		Q59F71;A5PLK9;P13497	tr|Q59F71|Q59F71_HUMAN Metalloendopeptidase (Fragment) OS=Homo sapiens OX=9606 PE=2 SV=1;tr|A5PLK9|A5PLK9_HUMAN Metalloendopeptidase OS=Homo sapiens OX=9606 GN=BMP1 PE=2 SV=1;sp|P13497|BMP1_HUMAN Bone morphogenetic protein 1 OS=Homo sapiens OX=9606 GN=BMP1	3	1	1	1	1	1	1	0	0	0	0	0	1	1	1	1	0	0	0	0	0	1.5	1.5	90.63	803	0	4.0454	1.5	1.5	1.5	1.5	0	0	0	0	0	16640000	12242000	16327000	12891000	0	0	0	0
547	Q59FC6	Tumor rejection antigen (Gp96) 1 variant (Fragment)		Q59FC6;Q5CAQ5;V9HWP2;P14625;Q96GW1;A0A1W2PRR1	tr|Q59FC6|Q59FC6_HUMAN Tumor rejection antigen (Gp96) 1 variant (Fragment) OS=Homo sapiens OX=9606 PE=2 SV=1;tr|Q5CAQ5|Q5CAQ5_HUMAN Epididymis secretory sperm binding protein OS=Homo sapiens OX=9606 GN=TRA1 PE=2 SV=1;tr|V9HWP2|V9HWP2_HUMAN Epididymis lumin	8	5	5	1	2	2	2	0	0	2	4	4	1	2	2	2	0	0	2	4	4	11.5	11.5	65.953	576	0	323.31	2.8	6.8	6.8	6.8	0	0	6.8	10.1	10.9	64825000	205450000	199670000	361650000	0	0	185750000	197370000
578	Q59FV9	PTK7 protein tyrosine kinase 7 isoform a variant (Fragment)		Q59FV9;Q13308;B7Z471;Q86X91	tr|Q59FV9|Q59FV9_HUMAN PTK7 protein tyrosine kinase 7 isoform a variant (Fragment) OS=Homo sapiens OX=9606 PE=2 SV=1;sp|Q13308|PTK7_HUMAN Inactive tyrosine-protein kinase 7 OS=Homo sapiens OX=9606 GN=PTK7 PE=1 SV=2;tr|B7Z471|B7Z471_HUMAN cDNA FLJ54697, hig	6	3	3	0	0	0	2	0	1	1	2	1	0	0	0	2	0	1	1	2	1	6.1	6.1	84.364	773	0	14.7	0	0	0	3.9	0	2.2	2.2	4.9	2.2	0	0	0	0	0	8340900	0	1175600
554	Q59GD4	Collagen, type V, alpha 3 preproprotein variant (Fragment)		Q59GD4;P25940	tr|Q59GD4|Q59GD4_HUMAN Collagen, type V, alpha 3 preproprotein variant (Fragment) OS=Homo sapiens OX=9606 PE=2 SV=1;sp|P25940|CO5A3_HUMAN Collagen alpha-3(V) chain OS=Homo sapiens OX=9606 GN=COL5A3 PE=1 SV=3	2	1	1	0	0	0	1	0	0	1	1	0	0	0	0	1	0	0	1	1	0	1	1	162.77	1658	0	71.224	0	0	0	1	0	0	1	1	0	0	0	0	13994000	0	0	3725300	8040300
511	Q59H44	Lymphocyte antigen 75 variant (Fragment)		Q59H44;O60449	tr|Q59H44|Q59H44_HUMAN Lymphocyte antigen 75 variant (Fragment) OS=Homo sapiens OX=9606 PE=2 SV=1;sp|O60449|LY75_HUMAN Lymphocyte antigen 75 OS=Homo sapiens OX=9606 GN=LY75 PE=1 SV=3	2	2	2	0	0	0	2	0	0	2	0	0	0	0	0	2	0	0	2	0	0	1.3	1.3	154.59	1340	0	3.8605	0	0	0	1.3	0	0	1.3	0	0	0	0	0	4063000	0	0	0	0
595	Q5CZ68	Uncharacterized protein DKFZp686D20108 (Fragment)	DKFZp686D20108	Q5CZ68;Q8NAV8;Q8IX30	tr|Q5CZ68|Q5CZ68_HUMAN Uncharacterized protein DKFZp686D20108 (Fragment) OS=Homo sapiens OX=9606 GN=DKFZp686D20108 PE=4 SV=1;tr|Q8NAV8|Q8NAV8_HUMAN cDNA FLJ34691 fis, clone MESAN2000909, moderately similar to Homo sapiens CEGP1 protein (CEGP1), mRNA OS=Hom	3	1	1	0	0	0	1	0	1	0	0	0	0	0	0	1	0	1	0	0	0	3.1	3.1	53.895	484	0	1.6107	0	0	0	3.1	0	3.1	0	0	0	0	0	0	0	0	13749000	0	0
346	Q5H9B4	Metalloproteinase inhibitor 1 (Fragment)	TIMP1	Q5H9B4;Q5H9B5;Q58P21;Q6FGX5;B3KQF4;P01033	tr|Q5H9B4|Q5H9B4_HUMAN Metalloproteinase inhibitor 1 (Fragment) OS=Homo sapiens OX=9606 GN=TIMP1 PE=1 SV=8;tr|Q5H9B5|Q5H9B5_HUMAN Metalloproteinase inhibitor 1 OS=Homo sapiens OX=9606 GN=TIMP1 PE=1 SV=1;tr|Q58P21|Q58P21_HUMAN Tissue inhibitor of metallopro	6	1	1	1	1	1	1	1	1	0	1	1	1	1	1	1	1	1	0	1	1	15.8	15.8	10.607	95	0	323.31	15.8	15.8	15.8	15.8	15.8	15.8	0	15.8	15.8	650130000	654760000	881100000	184530000	138190000	213870000	0	203550000
596	Q5HYE3	Uncharacterized protein DKFZp686H1812	DKFZp686H1812	Q5HYE3;Q6UWY5	tr|Q5HYE3|Q5HYE3_HUMAN Uncharacterized protein DKFZp686H1812 OS=Homo sapiens OX=9606 GN=DKFZp686H1812 PE=2 SV=1;sp|Q6UWY5|OLFL1_HUMAN Olfactomedin-like protein 1 OS=Homo sapiens OX=9606 GN=OLFML1 PE=1 SV=2	2	1	1	0	0	0	1	0	0	1	1	1	0	0	0	1	0	0	1	1	1	3.7	3.7	45.921	402	0	86.229	0	0	0	3.7	0	0	3.7	3.7	3.7	0	0	0	82160000	0	0	54271000	0
154	Q5JB40	Selectin-like protein		Q5JB40;A0A0A0MSD0;Q4LDE5	tr|Q5JB40|Q5JB40_HUMAN Selectin-like protein OS=Homo sapiens OX=9606 PE=2 SV=1;tr|A0A0A0MSD0|A0A0A0MSD0_HUMAN Sushi, von Willebrand factor type A, EGF and pentraxin domain-containing protein 1 OS=Homo sapiens OX=9606 GN=SVEP1 PE=1 SV=1;sp|Q4LDE5|SVEP1_HUMA	4	5	5	0	0	0	4	0	2	0	0	0	0	0	0	4	0	2	0	0	0	2.1	2.1	390.54	3574	0	197.53	0	0	0	1.6	0	0.9	0	0	0	0	0	0	21557000	0	25605000	0	0
597	Q5JRA6	Transport and Golgi organization protein 1 homolog (TANGO1) (C219-reactive peptide) (D320) (Melanoma inhibitory activity protein 3)	MIA3 KIAA0268 TANGO UNQ6077/PRO20088	Q5JRA6	sp|Q5JRA6|TGO1_HUMAN Transport and Golgi organization protein 1 homolog OS=Homo sapiens OX=9606 GN=MIA3 PE=1 SV=1	1	1	1	0	0	0	1	0	0	0	0	0	0	0	0	1	0	0	0	0	0	0.7	0.7	213.7	1907	0	6.8429	0	0	0	0.7	0	0	0	0	0	0	0	0	2358900	0	0	0	0
301	Q5JRP2	Disintegrin and metalloproteinase domain-containing protein 12 (Fragment)	ADAM12	Q5JRP2;A8K6G4;U5NE98;O43184	tr|Q5JRP2|Q5JRP2_HUMAN Disintegrin and metalloproteinase domain-containing protein 12 (Fragment) OS=Homo sapiens OX=9606 GN=ADAM12 PE=1 SV=1;tr|A8K6G4|A8K6G4_HUMAN cDNA FLJ77564 OS=Homo sapiens OX=9606 PE=2 SV=1;tr|U5NE98|U5NE98_HUMAN Metalloprotease-disin	4	1	1	0	0	0	1	0	0	0	0	0	0	0	0	1	0	0	0	0	0	5.8	5.8	31.111	278	0	1.6667	0	0	0	5.8	0	0	0	0	0	0	0	0	0	0	0	0	0
598	Q5JSG7	Proprotein convertase subtilisin/kexin type 5 (Fragment)	PCSK5	Q5JSG7;Q92824	tr|Q5JSG7|Q5JSG7_HUMAN Proprotein convertase subtilisin/kexin type 5 (Fragment) OS=Homo sapiens OX=9606 GN=PCSK5 PE=1 SV=1;sp|Q92824|PCSK5_HUMAN Proprotein convertase subtilisin/kexin type 5 OS=Homo sapiens OX=9606 GN=PCSK5 PE=1 SV=4	2	1	1	0	0	0	1	0	0	0	0	0	0	0	0	1	0	0	0	0	0	0.8	0.8	173.89	1560	0	1.534	0	0	0	0.8	0	0	0	0	0	0	0	0	2432700	0	0	0	0
599	Q5KU26	Collectin-12 (Collectin placenta protein 1) (CL-P1) (hCL-P1) (Nurse cell scavenger receptor 2) (Scavenger receptor class A member 4) (Scavenger receptor with C-type lectin)	COLEC12 CLP1 NSR2 SCARA4 SRCL	Q5KU26	sp|Q5KU26|COL12_HUMAN Collectin-12 OS=Homo sapiens OX=9606 GN=COLEC12 PE=1 SV=3	1	3	3	0	0	0	3	1	1	2	2	1	0	0	0	3	1	1	2	2	1	6.3	6.3	81.514	742	0	323.31	0	0	0	6.3	2.2	2.2	4.3	4.3	2.2	0	0	0	40162000	39119000	23312000	47506000	26354000
19	Q5PY19	Transforming growth factor beta 1 (Fragment)		Q5PY19;A0A024R0P8;P01137	tr|Q5PY19|Q5PY19_HUMAN Transforming growth factor beta 1 (Fragment) OS=Homo sapiens OX=9606 PE=2 SV=1;tr|A0A024R0P8|A0A024R0P8_HUMAN Transforming growth factor beta OS=Homo sapiens OX=9606 GN=TGFB1 PE=3 SV=1;sp|P01137|TGFB1_HUMAN Transforming growth factor	3	1	1	0	0	0	1	0	0	1	0	0	0	0	0	1	0	0	1	0	0	9.6	9.6	8.4222	73	0.0053957	1.2779	0	0	0	9.6	0	0	9.6	0	0	0	0	0	8291600	0	0	0	0
600	Q5T795	Midasin (Fragment)	MDN1	Q5T795;Q9NU22	tr|Q5T795|Q5T795_HUMAN Midasin (Fragment) OS=Homo sapiens OX=9606 GN=MDN1 PE=1 SV=1;sp|Q9NU22|MDN1_HUMAN Midasin OS=Homo sapiens OX=9606 GN=MDN1 PE=1 SV=2	2	1	1	0	1	0	1	0	0	0	0	0	0	1	0	1	0	0	0	0	0	1.5	1.5	133.23	1181	0.0053763	1.2431	0	1.5	0	1.5	0	0	0	0	0	0	38823000	0	4385200	0	0	0	0
270	Q5T987	Inter-alpha-trypsin inhibitor heavy chain H2 (Fragment)	ITIH2	Q5T987;Q5T985;A2RTY6;D3DRR6;P19823	tr|Q5T987|Q5T987_HUMAN Inter-alpha-trypsin inhibitor heavy chain H2 (Fragment) OS=Homo sapiens OX=9606 GN=ITIH2 PE=1 SV=1;tr|Q5T985|Q5T985_HUMAN Inter-alpha-trypsin inhibitor heavy chain H2 OS=Homo sapiens OX=9606 GN=ITIH2 PE=1 SV=1;tr|A2RTY6|A2RTY6_HUMAN	5	1	1	1	0	0	1	0	1	0	1	1	1	0	0	1	0	1	0	1	1	5.9	5.9	26.821	237	0	7.6609	5.9	0	0	5.9	0	5.9	0	5.9	5.9	7119800	0	0	41484000	0	58423000	0	0
5	Q5TB53	Transmembrane 9 superfamily member (Fragment)	TM9SF3	Q5TB53;Q8WUB5;Q96JZ5;A0A024QYS2;Q9HD45	tr|Q5TB53|Q5TB53_HUMAN Transmembrane 9 superfamily member (Fragment) OS=Homo sapiens OX=9606 GN=TM9SF3 PE=1 SV=8;tr|Q8WUB5|Q8WUB5_HUMAN Transmembrane 9 superfamily member (Fragment) OS=Homo sapiens OX=9606 GN=TM9SF3 PE=2 SV=2;tr|Q96JZ5|Q96JZ5_HUMAN Transme	5	1	1	1	1	0	1	0	1	1	1	1	1	1	0	1	0	1	1	1	1	4.3	4.3	29.881	253	0	3.4404	4.3	4.3	0	4.3	0	4.3	4.3	4.3	4.3	11031000	19055000	0	70913000	0	0	36427000	90615000
601	Q5U000	Cathepsin Z		Q5U000;Q9UBR2	tr|Q5U000|Q5U000_HUMAN Cathepsin Z OS=Homo sapiens OX=9606 PE=2 SV=1;sp|Q9UBR2|CATZ_HUMAN Cathepsin Z OS=Homo sapiens OX=9606 GN=CTSZ PE=1 SV=1	2	1	1	0	0	0	0	0	0	0	1	0	0	0	0	0	0	0	0	1	0	2	2	33.868	303	0	1.5395	0	0	0	0	0	0	0	2	0	0	0	0	0	0	0	0	0
241	Q5UGI6	Serine/cysteine proteinase inhibitor clade G member 1 splice variant 2 (Fragment)	SERPING1	Q5UGI6;A0A348GSH7;H9KV48;E9KL26;A0A384MDV8;E9PGN7;P05155	tr|Q5UGI6|Q5UGI6_HUMAN Serine/cysteine proteinase inhibitor clade G member 1 splice variant 2 (Fragment) OS=Homo sapiens OX=9606 GN=SERPING1 PE=2 SV=1;tr|A0A348GSH7|A0A348GSH7_HUMAN Serpin peptidase inhibitor clade G member 1 OS=Homo sapiens OX=9606 GN=SER	7	2	2	2	2	2	2	0	1	1	1	2	2	2	2	2	0	1	1	1	2	8.1	8.1	37.288	333	0	323.31	8.1	8.1	8.1	8.1	0	5.7	2.4	2.4	8.1	63686000	170420000	89532000	201080000	0	56593000	187530000	280830000
545	Q5VSQ6	Procollagen-proline, 2-oxoglutarate 4-dioxygenase (Proline 4-hydroxylase), alpha polypeptide I variant (Procollagen-proline, 2-oxoglutarate 4-dioxygenase (Proline 4-hydroxylase), alpha polypeptide I, isoform CRA_a) (Procollagen-proline, 2-oxoglutarate 4-dioxygenase (Proline 4-hydroxylase), alpha polypeptide I, isoform CRA_b) (Fragment)	P4HA1 hCG_19276	Q5VSQ6;P13674	tr|Q5VSQ6|Q5VSQ6_HUMAN Procollagen-proline, 2-oxoglutarate 4-dioxygenase (Proline 4-hydroxylase), alpha polypeptide I variant (Fragment) OS=Homo sapiens OX=9606 GN=P4HA1 PE=2 SV=1;sp|P13674|P4HA1_HUMAN Prolyl 4-hydroxylase subunit alpha-1 OS=Homo sapiens O	2	1	1	1	1	1	1	0	0	1	1	1	1	1	1	1	0	0	1	1	1	2.6	2.6	60.966	534	0	15.767	2.6	2.6	2.6	2.6	0	0	2.6	2.6	2.6	13319000	0	0	215000000	0	0	14749000	57471000
363	Q5VVQ7	C4b-binding protein beta chain (Fragment)	C4BPB	Q5VVQ7;B4DDY0;P20851	tr|Q5VVQ7|Q5VVQ7_HUMAN C4b-binding protein beta chain (Fragment) OS=Homo sapiens OX=9606 GN=C4BPB PE=1 SV=1;tr|B4DDY0|B4DDY0_HUMAN cDNA FLJ52252, highly similar to C4b-binding protein beta chain OS=Homo sapiens OX=9606 PE=2 SV=1;sp|P20851|C4BPB_HUMAN C4b-b	3	1	1	0	0	0	1	0	0	0	1	0	0	0	0	1	0	0	0	1	0	5.5	5.5	20.298	181	0	2.0242	0	0	0	5.5	0	0	0	5.5	0	0	0	0	14574000	0	0	0	8628500
602	Q687X5	Metalloreductase STEAP4 (EC 1.16.1.9) (Six-transmembrane epithelial antigen of prostate 4) (SixTransMembrane protein of prostate 2) (Tumor necrosis factor, alpha-induced protein 9)	STEAP4 STAMP2 TNFAIP9	Q687X5	sp|Q687X5|STEA4_HUMAN Metalloreductase STEAP4 OS=Homo sapiens OX=9606 GN=STEAP4 PE=1 SV=1	1	1	1	1	1	1	1	1	1	1	1	1	1	1	1	1	1	1	1	1	1	2.6	2.6	51.981	459	0	71.778	2.6	2.6	2.6	2.6	2.6	2.6	2.6	2.6	2.6	18207000	23163000	0	62603000	84507000	63588000	30234000	50774000
603	Q68CP4	Heparan-alpha-glucosaminide N-acetyltransferase (EC 2.3.1.78) (Transmembrane protein 76)	HGSNAT TMEM76	Q68CP4;E5RJC4;Q8IVU6;H0YAZ0;E5RJN0;Q96M97	sp|Q68CP4|HGNAT_HUMAN Heparan-alpha-glucosaminide N-acetyltransferase OS=Homo sapiens OX=9606 GN=HGSNAT PE=1 SV=2;tr|E5RJC4|E5RJC4_HUMAN Heparan-alpha-glucosaminide N-acetyltransferase OS=Homo sapiens OX=9606 GN=HGSNAT PE=1 SV=1;tr|Q8IVU6|Q8IVU6_HUMAN HGSN	6	2	2	0	0	0	2	0	0	0	0	0	0	0	0	2	0	0	0	0	0	3.9	3.9	73.293	663	0	11.386	0	0	0	3.9	0	0	0	0	0	0	0	0	10945000	0	0	0	0
604	Q68DQ2	Very large A-kinase anchor protein (vlAKAP) (Beta/gamma crystallin domain-containing protein 3)	CRYBG3	Q68DQ2	sp|Q68DQ2|CRBG3_HUMAN Very large A-kinase anchor protein OS=Homo sapiens OX=9606 GN=CRYBG3 PE=1 SV=3	1	1	1	0	0	0	0	0	0	0	1	0	0	0	0	0	0	0	0	1	0	0.6	0.6	330.63	2970	1	-2	0	0	0	0	0	0	0	0.6	0	0	0	0	0	0	0	0	59804000
310	Q6AWA9	Uncharacterized protein DKFZp686A03134 (Fragment)	DKFZp686A03134	Q6AWA9;Q5JWQ4;Q71SW6;E7EX60;Q9H2E1;Q5T7F0;Q59F20;Q6X907;E9PEP6;A8K9V7;Q68DN3;O14786;V9GYL7;Q5JWQ6	tr|Q6AWA9|Q6AWA9_HUMAN Uncharacterized protein DKFZp686A03134 (Fragment) OS=Homo sapiens OX=9606 GN=DKFZp686A03134 PE=2 SV=1;tr|Q5JWQ4|Q5JWQ4_HUMAN Neuropilin-1 OS=Homo sapiens OX=9606 GN=NRP1 PE=1 SV=2;tr|Q71SW6|Q71SW6_HUMAN Neuropilin OS=Homo sapiens OX=	14	2	2	0	0	0	2	0	0	0	1	0	0	0	0	2	0	0	0	1	0	5	5	60.594	538	0	301.71	0	0	0	5	0	0	0	2	0	0	0	0	25129000	0	0	0	0
605	Q6AZY7	Scavenger receptor class A member 3 (Cellular stress response gene protein)	SCARA3 CSR	Q6AZY7	sp|Q6AZY7|SCAR3_HUMAN Scavenger receptor class A member 3 OS=Homo sapiens OX=9606 GN=SCARA3 PE=1 SV=1	1	5	5	0	2	1	3	2	2	2	4	2	0	2	1	3	2	2	2	4	2	13.2	13.2	65.136	606	0	120.68	0	4.8	1.7	7.9	4.8	4.8	5.3	10.1	4.8	0	27408000	0	33223000	57576000	35228000	79917000	83473000
606	Q6EMK4	Vasorin (Protein slit-like 2)	VASN SLITL2 UNQ314/PRO357/PRO1282	Q6EMK4	sp|Q6EMK4|VASN_HUMAN Vasorin OS=Homo sapiens OX=9606 GN=VASN PE=1 SV=1	1	1	1	0	1	0	1	0	0	0	1	0	0	1	0	1	0	0	0	1	0	1.5	1.5	71.712	673	0	7.4715	0	1.5	0	1.5	0	0	0	1.5	0	0	6895200	0	11621000	0	0	0	0
536	Q6FH10	Decorin (Bone proteoglycan II)	DCN DKFZp686J19238 hCG_24110	Q6FH10;P07585	tr|Q6FH10|Q6FH10_HUMAN Decorin OS=Homo sapiens OX=9606 GN=DCN PE=2 SV=1;sp|P07585|PGS2_HUMAN Decorin OS=Homo sapiens OX=9606 GN=DCN PE=1 SV=1	15	13	12	9	8	7	8	3	5	5	9	9	8	7	7	7	3	5	5	8	8	56.3	54	39.746	359	0	323.31	46.2	42.1	34	39	17.3	30.1	27.6	39.3	40.1	67007000000	61843000000	38214000000	18284000000	56626000000	35321000000	32436000000	15836000000
607	Q6FHG6	PRELP protein (Fragment)	PRELP	Q6FHG6	tr|Q6FHG6|Q6FHG6_HUMAN PRELP protein (Fragment) OS=Homo sapiens OX=9606 GN=PRELP PE=2 SV=1	1	12	1	10	8	9	8	8	8	9	10	9	0	0	0	0	1	0	1	1	1	49	6.8	43.782	382	0	10.371	40.1	32.5	36.6	32.2	35.9	32.2	37.4	43.5	40.3	0	0	0	0	0	0	0	0
608	Q6IAG3	IL17B protein	IL17B	Q6IAG3;Q9UHF5	tr|Q6IAG3|Q6IAG3_HUMAN IL17B protein OS=Homo sapiens OX=9606 GN=IL17B PE=2 SV=1;sp|Q9UHF5|IL17B_HUMAN Interleukin-17B OS=Homo sapiens OX=9606 GN=IL17B PE=2 SV=1	2	1	1	0	0	1	0	0	0	1	0	0	0	0	1	0	0	0	1	0	0	4.4	4.4	20.465	180	1	-2	0	0	4.4	0	0	0	4.4	0	0	0	0	2534600	0	0	0	1238500	0
325	Q6IAP9	PRPF4 protein	PRPF4	Q6IAP9;Q5T1M7;B2R7V4;Q59EL4;O43172	tr|Q6IAP9|Q6IAP9_HUMAN PRPF4 protein OS=Homo sapiens OX=9606 GN=PRPF4 PE=2 SV=1;tr|Q5T1M7|Q5T1M7_HUMAN 60 kDa U4/U6 snRNP-specific spliceosomal protein OS=Homo sapiens OX=9606 GN=PRPF4 PE=2 SV=1;tr|B2R7V4|B2R7V4_HUMAN cDNA, FLJ93619, highly similar to Homo	5	1	1	0	0	0	0	0	0	0	0	1	0	0	0	0	0	0	0	0	1	2.3	2.3	58.306	521	0.0053097	1.2142	0	0	0	0	0	0	0	0	2.3	0	0	0	0	0	0	0	0
347	Q6IAW5	CALU protein (Calumenin) (Calumenin, isoform CRA_b) (cDNA, FLJ92797, Homo sapiens calumenin (CALU), mRNA)	CALU hCG_41656 tcag7.422	Q6IAW5;B3KQF5;O43852	tr|Q6IAW5|Q6IAW5_HUMAN CALU protein OS=Homo sapiens OX=9606 GN=CALU PE=2 SV=1;tr|B3KQF5|B3KQF5_HUMAN cDNA FLJ90381 fis, clone NT2RP2005035, highly similar to Calumenin OS=Homo sapiens OX=9606 PE=2 SV=1;sp|O43852|CALU_HUMAN Calumenin OS=Homo sapiens OX=9606	3	1	1	0	0	0	0	0	0	1	1	1	0	0	0	0	0	0	1	1	1	6.3	6.3	37.106	315	0	199.01	0	0	0	0	0	0	6.3	6.3	6.3	0	0	0	0	0	0	17837000	26754000
586	Q6IBJ4	SGCB protein	SGCB	Q6IBJ4;Q5U0N0;Q16585	tr|Q6IBJ4|Q6IBJ4_HUMAN SGCB protein OS=Homo sapiens OX=9606 GN=SGCB PE=2 SV=1;tr|Q5U0N0|Q5U0N0_HUMAN Sarcoglycan, beta (43kDa dystrophin-associated glycoprotein) OS=Homo sapiens OX=9606 GN=SGCB PE=2 SV=1;sp|Q16585|SGCB_HUMAN Beta-sarcoglycan OS=Homo sapien	3	1	1	0	1	0	1	1	1	1	1	1	0	1	0	1	1	1	1	1	1	3.8	3.8	34.742	318	0	12.501	0	3.8	0	3.8	3.8	3.8	3.8	3.8	3.8	0	6423500	0	19146000	0	20275000	21783000	31952000
139	Q6LAM1	Heavy chain of factor I (Fragment)		Q6LAM1;Q8WW88;A0A087X0I2;G3XAM2;A0A0U4BCF5;A8K3L0;E7ETH0;B4DRF2;A0A2R8Y3M9;P05156;D6R9Z8	tr|Q6LAM1|Q6LAM1_HUMAN Heavy chain of factor I (Fragment) OS=Homo sapiens OX=9606 PE=2 SV=1;tr|Q8WW88|Q8WW88_HUMAN CFI protein OS=Homo sapiens OX=9606 GN=CFI PE=2 SV=1;tr|A0A087X0I2|A0A087X0I2_HUMAN Complement factor I OS=Homo sapiens OX=9606 GN=CFI PE=1 S	11	2	2	0	1	2	1	1	2	1	1	1	0	1	2	1	1	2	1	1	1	9	9	35.883	321	0	29.399	0	3.7	9	3.7	3.7	9	3.7	3.7	3.7	0	31631000	0	46311000	0	26324000	32222000	53400000
609	Q6LDQ3	Sulfated glycoprotein 2 (Fragment)		Q6LDQ3	tr|Q6LDQ3|Q6LDQ3_HUMAN Sulfated glycoprotein 2 (Fragment) OS=Homo sapiens OX=9606 PE=2 SV=1	1	3	1	2	2	1	0	0	0	1	2	2	1	1	1	0	0	0	1	1	1	66.7	24.2	7.8029	66	0	45.467	54.5	54.5	24.2	0	0	0	24.2	36.4	36.4	51953000	18418000	6105200	0	0	0	6776100	8372900
384	Q6LEP5	TIMP-3 (Fragment)		Q6LEP5;B4DNZ4;P35625	tr|Q6LEP5|Q6LEP5_HUMAN TIMP-3 (Fragment) OS=Homo sapiens OX=9606 PE=2 SV=1;tr|B4DNZ4|B4DNZ4_HUMAN cDNA FLJ51917, highly similar to Metalloproteinase inhibitor 3 OS=Homo sapiens OX=9606 PE=2 SV=1;sp|P35625|TIMP3_HUMAN Metalloproteinase inhibitor 3 OS=Homo s	3	1	1	0	0	1	0	0	0	1	0	0	0	0	1	0	0	0	1	0	0	72.7	72.7	1.1703	11	1	-2	0	0	72.7	0	0	0	72.7	0	0	0	0	97657000	0	0	0	37609000	0
610	Q6MZM7	Uncharacterized protein DKFZp686O12165 (Fragment)	DKFZp686O12165	Q6MZM7	tr|Q6MZM7|Q6MZM7_HUMAN Uncharacterized protein DKFZp686O12165 (Fragment) OS=Homo sapiens OX=9606 GN=DKFZp686O12165 PE=2 SV=1	1	39	0	16	17	16	30	12	17	22	25	28	0	0	0	0	0	0	0	0	0	31.7	0	240.64	2193	0	20.625	11.7	14	11.6	23.3	9.4	14.3	17.3	20.6	22.2	166450000	4634500000	112960000	7136000000	3812900000	3384700000	4574500000	1898800000
611	Q6N084	Uncharacterized protein DKFZp686L11144 (Fragment)	DKFZp686L11144	Q6N084	tr|Q6N084|Q6N084_HUMAN Uncharacterized protein DKFZp686L11144 (Fragment) OS=Homo sapiens OX=9606 GN=DKFZp686L11144 PE=2 SV=1	1	18	1	4	4	5	14	2	6	7	10	10	0	0	0	1	0	0	1	0	1	34.1	1.9	113.37	1034	0	117.42	5.7	6.6	9.3	26.3	2.7	10.3	14	19.3	20.1	0	0	0	9564800	0	0	0	0
612	Q6P528	ASPN protein	ASPN	Q6P528;Q9BXN1	tr|Q6P528|Q6P528_HUMAN Asporin OS=Homo sapiens OX=9606 GN=ASPN PE=2 SV=1;sp|Q9BXN1|ASPN_HUMAN Asporin OS=Homo sapiens OX=9606 GN=ASPN PE=1 SV=2	4	3	3	1	1	1	3	2	2	3	3	2	1	1	1	3	2	2	3	3	2	12	12	43.891	384	0	197.5	3.6	3.6	3.6	12	8.1	7.6	12	12	8.1	574490000	397450000	341930000	4271800000	2463300000	3327300000	5494900000	3367200000
344	Q6PEJ8	HP protein	HP	Q6PEJ8;B3KP77;Q6NSB4;A0A087WU08;A0A0C4DGL8;J3QR68;H0Y300;P00738;H3BS21;A0A0A0MRD9;J3QLC9;P00739	tr|Q6PEJ8|Q6PEJ8_HUMAN HP protein OS=Homo sapiens OX=9606 GN=HP PE=2 SV=1;tr|B3KP77|B3KP77_HUMAN cDNA FLJ31310 fis, clone LIVER1000165, highly similar to Haptoglobin OS=Homo sapiens OX=9606 PE=2 SV=1;tr|Q6NSB4|Q6NSB4_HUMAN HP protein OS=Homo sapiens OX=960	12	4	4	3	3	2	3	1	3	3	4	3	3	3	2	3	1	3	3	4	3	23.2	23.2	25.458	228	0	322.08	23.2	23.2	17.5	23.2	7	23.2	23.2	23.2	23.2	267370000	304760000	159010000	675900000	132510000	1105900000	274880000	1869900000
614	Q6Q4G3	Aminopeptidase Q (AP-Q) (APQ) (EC 3.4.11.-) (CHL2 antigen) (Laeverin)	LVRN AQPEP	Q6Q4G3;A0A0A0MS63;Q0P5U8	sp|Q6Q4G3|AMPQ_HUMAN Aminopeptidase Q OS=Homo sapiens OX=9606 GN=LVRN PE=1 SV=4;tr|A0A0A0MS63|A0A0A0MS63_HUMAN Aminopeptidase OS=Homo sapiens OX=9606 GN=LVRN PE=1 SV=1;tr|Q0P5U8|Q0P5U8_HUMAN Aminopeptidase OS=Homo sapiens OX=9606 GN=FLJ90650 PE=1 SV=1	3	2	2	0	0	0	0	0	0	0	2	0	0	0	0	0	0	0	0	2	0	2	2	113.28	990	0	2.6706	0	0	0	0	0	0	0	2	0	0	0	0	0	0	0	0	0
217	Q6Q4G8	Neurominidase (Fragment)	NEU1	Q6Q4G8;Q59GU8;Q6IBT5;Q5JQI0;A8K4K1;A0A1U9X836;Q99519	tr|Q6Q4G8|Q6Q4G8_HUMAN Neurominidase (Fragment) OS=Homo sapiens OX=9606 GN=NEU1 PE=4 SV=1;tr|Q59GU8|Q59GU8_HUMAN Neuraminidase variant (Fragment) OS=Homo sapiens OX=9606 PE=2 SV=1;tr|Q6IBT5|Q6IBT5_HUMAN NEU1 protein OS=Homo sapiens OX=9606 GN=NEU1 PE=2 SV=	7	1	1	0	0	0	0	0	0	0	1	0	0	0	0	0	0	0	0	1	0	8.6	8.6	12.795	116	0	1.862	0	0	0	0	0	0	0	8.6	0	0	0	0	0	0	0	0	2581000
114	Q6QIN1	CD45 (Fragment)	PTPRC	Q6QIN1;A0A140TA57;M9MMK9;A0A2R8YE81;A0A140TA77;A0A140TA68;A0A0G2JNW2;E9PKH0;M3ZCP1;B4DSZ5;A0A075B788;Q6PJK7;B4E0V3;P08575	tr|Q6QIN1|Q6QIN1_HUMAN CD45 (Fragment) OS=Homo sapiens OX=9606 GN=PTPRC PE=4 SV=1;tr|A0A140TA57|A0A140TA57_HUMAN Receptor-type tyrosine-protein phosphatase C (Fragment) OS=Homo sapiens OX=9606 GN=PTPRC PE=1 SV=1;tr|M9MMK9|M9MMK9_HUMAN Receptor-type tyrosin	14	1	1	0	0	0	1	0	1	0	1	1	0	0	0	1	0	1	0	1	1	16.7	16.7	8.0028	72	0	11.229	0	0	0	16.7	0	16.7	0	16.7	16.7	0	0	0	12428000	0	12491000	0	7035300
615	Q6UVK1	Chondroitin sulfate proteoglycan 4 (Chondroitin sulfate proteoglycan NG2) (Melanoma chondroitin sulfate proteoglycan) (Melanoma-associated chondroitin sulfate proteoglycan)	CSPG4 MCSP	Q6UVK1;A2VCL1	sp|Q6UVK1|CSPG4_HUMAN Chondroitin sulfate proteoglycan 4 OS=Homo sapiens OX=9606 GN=CSPG4 PE=1 SV=2;tr|A2VCL1|A2VCL1_HUMAN CSPG4 protein (Fragment) OS=Homo sapiens OX=9606 GN=CSPG4 PE=2 SV=1	2	4	4	3	3	2	3	1	3	2	2	3	3	3	2	3	1	3	2	2	3	3.5	3.5	250.53	2322	0	196.55	2.4	2.4	1.2	2.4	0.6	2.4	1.9	1.9	2.9	149390000	96626000	126080000	125850000	0	83623000	226140000	310160000
616	Q6UWX4	HHIP-like protein 2	HHIPL2 HHIP3 KIAA1822L UNQ841/PRO1779	Q6UWX4	sp|Q6UWX4|HIPL2_HUMAN HHIP-like protein 2 OS=Homo sapiens OX=9606 GN=HHIPL2 PE=1 SV=1	1	1	1	0	1	0	0	0	0	0	0	0	0	1	0	0	0	0	0	0	0	3	3	80.778	724	0	6.2946	0	3	0	0	0	0	0	0	0	0	34170000	0	0	0	0	0	0
617	Q6UXX5	Inter-alpha-trypsin inhibitor heavy chain H6 (Inter-alpha-trypsin inhibitor heavy chain H5-like protein) (Inter-alpha inhibitor H5-like protein)	ITIH6 ITIH5L UNQ6369/PRO21074	Q6UXX5	sp|Q6UXX5|ITIH6_HUMAN Inter-alpha-trypsin inhibitor heavy chain H6 OS=Homo sapiens OX=9606 GN=ITIH6 PE=2 SV=1	1	3	3	3	3	2	1	1	0	1	1	1	3	3	2	1	1	0	1	1	1	4.3	4.3	143.19	1313	0	30.416	4.3	4.3	2.4	1.4	1.4	0	1.4	1.4	1.4	33313000	43864000	35758000	12184000	18830000	0	21299000	20971000
618	Q6V0I7	Protocadherin Fat 4 (hFat4) (Cadherin family member 14) (FAT tumor suppressor homolog 4) (Fat-like cadherin protein FAT-J)	FAT4 CDHF14 FATJ Nbla00548	Q6V0I7	sp|Q6V0I7|FAT4_HUMAN Protocadherin Fat 4 OS=Homo sapiens OX=9606 GN=FAT4 PE=1 SV=2	1	3	3	0	0	1	2	0	1	1	1	1	0	0	1	2	0	1	1	1	1	0.8	0.8	542.68	4981	0	25.109	0	0	0.3	0.5	0	0.3	0.3	0.3	0.3	0	0	29030000	132380000	0	375220000	200980000	0
409	Q6WN33	Chordin-like protein 2 (Chordin-related protein 2 variant III) (Fragment)	CHRDL2 CHL2	Q6WN33;B4E311;Q6WN34	tr|Q6WN33|Q6WN33_HUMAN Chordin-like protein 2 (Fragment) OS=Homo sapiens OX=9606 GN=CHRDL2 PE=1 SV=1;tr|B4E311|B4E311_HUMAN cDNA FLJ61081, highly similar to Chordin-like protein 2 OS=Homo sapiens OX=9606 PE=2 SV=1;sp|Q6WN34|CRDL2_HUMAN Chordin-like protein	3	1	1	1	0	0	0	0	0	0	0	1	1	0	0	0	0	0	0	0	1	7.8	7.8	33.87	308	0	43.461	7.8	0	0	0	0	0	0	0	7.8	35720000	0	0	0	0	0	0	0
619	Q6YHK3	CD109 antigen (150 kDa TGF-beta-1-binding protein) (C3 and PZP-like alpha-2-macroglobulin domain-containing protein 7) (Platelet-specific Gov antigen) (p180) (r150) (CD antigen CD109)	CD109 CPAMD7	Q6YHK3	sp|Q6YHK3|CD109_HUMAN CD109 antigen OS=Homo sapiens OX=9606 GN=CD109 PE=1 SV=2	1	7	7	1	3	3	6	3	3	5	5	6	1	3	3	6	3	3	5	5	6	6.4	6.4	161.69	1445	0	323.31	0.8	2.3	2.3	5.7	2.3	2.1	4.7	4.7	5.7	143460000	180550000	172610000	488030000	746360000	446220000	473360000	612400000
23	Q6ZME7	Peptidylprolyl isomerase (EC 5.2.1.8)		Q6ZME7;Q658U4;A0A024R1W3;Q96AY3;Q8NAG5;B4DJJ5	tr|Q6ZME7|Q6ZME7_HUMAN Peptidylprolyl isomerase OS=Homo sapiens OX=9606 PE=2 SV=1;tr|Q658U4|Q658U4_HUMAN Peptidylprolyl isomerase OS=Homo sapiens OX=9606 GN=DKFZp666D193 PE=2 SV=1;tr|A0A024R1W3|A0A024R1W3_HUMAN Peptidylprolyl isomerase OS=Homo sapiens OX=9	11	7	7	3	4	3	7	5	4	7	7	6	3	4	3	7	5	4	7	7	6	20.6	20.6	59.577	543	0	323.31	12.7	14.9	9.2	20.6	14.9	14.9	20.6	20.6	17.5	168810000	86500000	114550000	641930000	350210000	533740000	428700000	709120000
620	Q6ZMJ2	Scavenger receptor class A member 5 (Scavenger receptor hlg)	SCARA5 UNQ2938/PRO28700	Q6ZMJ2;B4DVB2	sp|Q6ZMJ2|SCAR5_HUMAN Scavenger receptor class A member 5 OS=Homo sapiens OX=9606 GN=SCARA5 PE=2 SV=1;tr|B4DVB2|B4DVB2_HUMAN cDNA FLJ57441, highly similar to Homo sapiens scavenger receptor class A, member 5 (SCARA5), mRNA OS=Homo sapiens OX=9606 PE=2 SV=1	2	2	2	0	0	0	2	0	0	0	1	0	0	0	0	2	0	0	0	1	0	4.4	4.4	53.994	495	0	4.7075	0	0	0	4.4	0	0	0	2.2	0	0	0	0	2657100	0	0	0	9221400
162	Q6ZNN4	cDNA FLJ27428 fis, clone WMD05691, highly similar to Collagen alpha 2(XI) chain		Q6ZNN4;A0A0G2JHD9;A0A1U9X7J8;A0A1U9X7J1;A0A1U9X7I9;A0A1U9X7I7;A0A1U9X7H3;A0A1U9X7I1;A0A140TA43;A0A0G2JL35;Q4VXY6;A0A140T9N1;H0YIS1;A0A140TA54;A0A140T9I7;A0A0C4DFS1;P13942	tr|Q6ZNN4|Q6ZNN4_HUMAN cDNA FLJ27428 fis, clone WMD05691, highly similar to Collagen alpha 2(XI) chain OS=Homo sapiens OX=9606 PE=2 SV=1;tr|A0A0G2JHD9|A0A0G2JHD9_HUMAN Collagen alpha-2(XI) chain (Fragment) OS=Homo sapiens OX=9606 GN=COL11A2 PE=1 SV=1;tr|A0	17	1	1	0	0	0	0	1	1	0	0	1	0	0	0	0	1	1	0	0	1	5.2	5.2	33.282	306	0	21.178	0	0	0	0	5.2	5.2	0	0	5.2	0	0	0	0	57263000	60009000	0	0
621	Q6ZSU2	Disks large homolog 2 (cDNA FLJ45207 fis, clone BRCAN2010665, highly similar to Channel associated protein of synapse-110)	DLG2	Q6ZSU2	tr|Q6ZSU2|Q6ZSU2_HUMAN Disks large homolog 2 OS=Homo sapiens OX=9606 GN=DLG2 PE=1 SV=1	1	1	1	0	0	0	0	0	0	1	1	1	0	0	0	0	0	0	1	1	1	1.3	1.3	59.317	552	1	-2	0	0	0	0	0	0	1.3	1.3	1.3	0	0	0	0	0	0	0	0
581	Q75MQ2	Uncharacterized protein SEMA3A (Fragment)	SEMA3A	Q75MQ2;Q14563	tr|Q75MQ2|Q75MQ2_HUMAN Uncharacterized protein SEMA3A (Fragment) OS=Homo sapiens OX=9606 GN=SEMA3A PE=4 SV=1;sp|Q14563|SEM3A_HUMAN Semaphorin-3A OS=Homo sapiens OX=9606 GN=SEMA3A PE=1 SV=1	2	1	1	1	1	1	0	0	0	0	1	0	1	1	1	0	0	0	0	1	0	5.9	5.9	33.548	287	0	18.873	5.9	5.9	5.9	0	0	0	0	5.9	0	11646000	0	0	0	0	0	0	0
622	Q75T13	GPI inositol-deacylase (EC 3.1.-.-) (Post-GPI attachment to proteins factor 1) (hPGAP1)	PGAP1 UNQ3024/PRO9822	Q75T13	sp|Q75T13|PGAP1_HUMAN GPI inositol-deacylase OS=Homo sapiens OX=9606 GN=PGAP1 PE=1 SV=1	1	1	1	0	0	0	1	0	0	0	0	0	0	0	0	1	0	0	0	0	0	1.7	1.7	105.38	922	0	1.5992	0	0	0	1.7	0	0	0	0	0	0	0	0	5312700	0	0	0	0
623	Q7LGC8	Carbohydrate sulfotransferase 3 (EC 2.8.2.17) (Chondroitin 6-O-sulfotransferase 1) (C6ST-1) (Chondroitin 6-sulfotransferase) (Galactose/N-acetylglucosamine/N-acetylglucosamine 6-O-sulfotransferase 0) (GST-0)	CHST3	Q7LGC8	sp|Q7LGC8|CHST3_HUMAN Carbohydrate sulfotransferase 3 OS=Homo sapiens OX=9606 GN=CHST3 PE=1 SV=3	1	3	3	2	2	1	2	0	1	2	2	3	2	2	1	2	0	1	2	2	3	6.3	6.3	54.705	479	0	32.753	4.6	4.6	1.7	4.6	0	1.7	4.6	4.6	6.3	87784000	89029000	119600000	12515000	0	37834000	33914000	35972000
63	Q7Z2W2	Extracellular sulfatase (EC 3.1.6.-)	DKFZp686F13142	Q7Z2W2;A0A024R809;Q8IWU6	tr|Q7Z2W2|Q7Z2W2_HUMAN Extracellular sulfatase OS=Homo sapiens OX=9606 GN=DKFZp686F13142 PE=2 SV=1;tr|A0A024R809|A0A024R809_HUMAN Extracellular sulfatase OS=Homo sapiens OX=9606 GN=SULF1 PE=3 SV=1;sp|Q8IWU6|SULF1_HUMAN Extracellular sulfatase Sulf-1 OS=Hom	5	5	5	2	1	2	4	0	0	2	3	2	2	1	2	4	0	0	2	3	2	8.3	8.3	101.05	871	0	37.323	2.3	1.4	2.3	5.9	0	0	2.3	4.7	2.3	19224000	14301000	14063000	19058000	0	0	13032000	18883000
487	Q7Z5M0	Collagenase 3 (Collagenase-3 deletion variant COL3-DEL)	MMP13	Q7Z5M0;Q53H33;Q7Z5M1;G5E971;P45452;Q6LBE5	tr|Q7Z5M0|Q7Z5M0_HUMAN Matrix metalloproteinase OS=Homo sapiens OX=9606 GN=MMP13 PE=1 SV=1;tr|Q53H33|Q53H33_HUMAN Matrix metalloproteinase 13 preproprotein variant (Fragment) OS=Homo sapiens OX=9606 PE=2 SV=1;tr|Q7Z5M1|Q7Z5M1_HUMAN Collagenase-3 splice var	6	2	2	0	0	0	1	0	0	0	2	1	0	0	0	1	0	0	0	2	1	4.7	4.7	43.522	383	0	6.3428	0	0	0	3.1	0	0	0	4.7	3.1	0	0	0	11246000	0	0	0	25239000
559	Q7Z5Y6	Bone morphogenetic protein 8A (BMP-8A)	BMP8A	Q7Z5Y6;P34820	sp|Q7Z5Y6|BMP8A_HUMAN Bone morphogenetic protein 8A OS=Homo sapiens OX=9606 GN=BMP8A PE=2 SV=2;sp|P34820|BMP8B_HUMAN Bone morphogenetic protein 8B OS=Homo sapiens OX=9606 GN=BMP8B PE=2 SV=2	2	1	1	1	1	0	1	0	1	0	0	1	1	1	0	1	0	1	0	0	1	2.2	2.2	44.798	402	0.0052265	1.0527	2.2	2.2	0	2.2	0	2.2	0	0	2.2	4825200	0	0	3839400	0	14840000	0	0
625	Q7Z7M9	Polypeptide N-acetylgalactosaminyltransferase 5 (EC 2.4.1.41) (Polypeptide GalNAc transferase 5) (GalNAc-T5) (pp-GaNTase 5) (Protein-UDP acetylgalactosaminyltransferase 5) (UDP-GalNAc:polypeptide N-acetylgalactosaminyltransferase 5)	GALNT5	Q7Z7M9;A5PL16	sp|Q7Z7M9|GALT5_HUMAN Polypeptide N-acetylgalactosaminyltransferase 5 OS=Homo sapiens OX=9606 GN=GALNT5 PE=1 SV=1;tr|A5PL16|A5PL16_HUMAN GALNT5 protein OS=Homo sapiens OX=9606 GN=GALNT5 PE=2 SV=1	3	4	4	0	0	0	3	1	0	0	4	0	0	0	0	3	1	0	0	4	0	6	6	106.26	940	0	61.982	0	0	0	5	1.3	0	0	6	0	0	0	0	13059000	0	0	0	15036000
223	Q86TT2	Full-length cDNA clone CS0DI019YF20 of Placenta of Homo sapiens (human) (Fragment)		Q86TT2;A0A286YES1;Q6N030;Q5EBM2;P01860	tr|Q86TT2|Q86TT2_HUMAN Full-length cDNA clone CS0DI019YF20 of Placenta of Homo sapiens (human) (Fragment) OS=Homo sapiens OX=9606 PE=2 SV=1;tr|A0A286YES1|A0A286YES1_HUMAN Immunoglobulin heavy constant gamma 3 (Fragment) OS=Homo sapiens OX=9606 GN=IGHG3 PE=	5	2	1	1	1	1	2	1	1	1	2	2	1	1	1	1	1	1	1	1	1	7.1	2.5	39.125	354	0	18.513	2.5	2.5	2.5	7.1	2.5	2.5	2.5	7.1	7.1	64672000	44278000	141440000	405010000	69687000	87824000	61664000	1513000000
627	Q86WC4	Osteopetrosis-associated transmembrane protein 1 (Chloride channel 7 beta subunit)	OSTM1 GL HSPC019 UNQ6098/PRO21201	Q86WC4	sp|Q86WC4|OSTM1_HUMAN Osteopetrosis-associated transmembrane protein 1 OS=Homo sapiens OX=9606 GN=OSTM1 PE=1 SV=1	1	1	1	0	0	0	1	0	0	0	0	0	0	0	0	1	0	0	0	0	0	3.9	3.9	37.256	334	0	14.859	0	0	0	3.9	0	0	0	0	0	0	0	0	5529800	0	0	0	0
628	Q86XS5	Angiopoietin-related protein 5 (Angiopoietin-like protein 5)	ANGPTL5 UNQ5795/PRO19600	Q86XS5	sp|Q86XS5|ANGL5_HUMAN Angiopoietin-related protein 5 OS=Homo sapiens OX=9606 GN=ANGPTL5 PE=1 SV=3	1	1	1	0	1	0	0	1	0	0	1	0	0	1	0	0	1	0	0	1	0	2.1	2.1	44.144	388	0.0080386	0.67527	0	2.1	0	0	2.1	0	0	2.1	0	0	2025700	0	0	3455900	0	0	2611900
53	Q86XZ8	CDC42BPB protein (Fragment)	CDC42BPB	Q86XZ8;A0A024R6N2;Q9Y5S2	tr|Q86XZ8|Q86XZ8_HUMAN CDC42BPB protein (Fragment) OS=Homo sapiens OX=9606 GN=CDC42BPB PE=2 SV=1;tr|A0A024R6N2|A0A024R6N2_HUMAN CDC42 binding protein kinase beta (DMPK-like), isoform CRA_a OS=Homo sapiens OX=9606 GN=CDC42BPB PE=3 SV=1;sp|Q9Y5S2|MRCKB_HUMAN	3	1	1	0	0	0	1	0	0	0	0	0	0	0	0	1	0	0	0	0	0	2.6	2.6	56.805	492	1	-2	0	0	0	2.6	0	0	0	0	0	0	0	0	3237600	0	0	0	0
629	Q8IUX7	Adipocyte enhancer-binding protein 1 (AE-binding protein 1) (Aortic carboxypeptidase-like protein)	AEBP1 ACLP	Q8IUX7;B3KR36;B4DJB3	sp|Q8IUX7|AEBP1_HUMAN Adipocyte enhancer-binding protein 1 OS=Homo sapiens OX=9606 GN=AEBP1 PE=1 SV=1;tr|B3KR36|B3KR36_HUMAN cDNA FLJ33612 fis, clone BRAMY2016953, highly similar to Homo sapiens AE binding protein 1 (AEBP1), mRNA OS=Homo sapiens OX=9606 PE	3	2	2	1	2	1	2	1	2	2	2	2	1	2	1	2	1	2	2	2	2	3.4	3.4	130.93	1158	0	121.03	2.2	3.4	2.2	3.4	2.2	3.4	3.4	3.4	3.4	54854000	56212000	23103000	987950000	569060000	932610000	460350000	636890000
137	Q8IV28	NID2 protein	NID2	Q8IV28;A0A087WZP6;Q5CZI2;Q14112;H0YJV3	tr|Q8IV28|Q8IV28_HUMAN NID2 protein OS=Homo sapiens OX=9606 GN=NID2 PE=2 SV=1;tr|A0A087WZP6|A0A087WZP6_HUMAN Nidogen-2 OS=Homo sapiens OX=9606 GN=NID2 PE=1 SV=1;tr|Q5CZI2|Q5CZI2_HUMAN Uncharacterized protein DKFZp686D12108 (Fragment) OS=Homo sapiens OX=960	5	2	2	1	1	1	2	1	2	1	2	2	1	1	1	2	1	2	1	2	2	2.8	2.8	107.14	969	0	102.74	1.1	1.1	1.1	2.8	1.1	2.8	1.1	2.8	2.8	44047000	41749000	83623000	187330000	318640000	235620000	117460000	168400000
533	Q8IVC0	Serpin peptidase inhibitor, clade D (Heparin cofactor), member 1	SERPIND1	Q8IVC0;P05546	tr|Q8IVC0|Q8IVC0_HUMAN Serpin peptidase inhibitor, clade D (Heparin cofactor), member 1 OS=Homo sapiens OX=9606 GN=SERPIND1 PE=2 SV=1;sp|P05546|HEP2_HUMAN Heparin cofactor 2 OS=Homo sapiens OX=9606 GN=SERPIND1 PE=1 SV=3	2	1	1	1	1	1	1	0	0	0	0	0	1	1	1	1	0	0	0	0	0	1.6	1.6	56.957	499	1	-2	1.6	1.6	1.6	1.6	0	0	0	0	0	10916000	53830000	0	32247000	0	0	0	0
630	Q8IVN8	Somatomedin-B and thrombospondin type-1 domain-containing protein (RPE-spondin)	SBSPON C8orf84 RPESP	Q8IVN8	sp|Q8IVN8|SBSPO_HUMAN Somatomedin-B and thrombospondin type-1 domain-containing protein OS=Homo sapiens OX=9606 GN=SBSPON PE=1 SV=2	1	1	1	0	0	0	0	0	0	1	0	0	0	0	0	0	0	0	1	0	0	8.7	8.7	29.61	264	0	81.118	0	0	0	0	0	0	8.7	0	0	0	0	0	0	0	0	0	0
631	Q8IW00	V-set and transmembrane domain-containing protein 4 [Cleaved into: Peptide Lv]	VSTM4 C10orf72	Q8IW00	sp|Q8IW00|VSTM4_HUMAN V-set and transmembrane domain-containing protein 4 OS=Homo sapiens OX=9606 GN=VSTM4 PE=2 SV=3	1	2	2	0	1	2	1	0	1	1	0	2	0	1	2	1	0	1	1	0	2	7.5	7.5	36.146	320	0	9.9608	0	3.1	7.5	4.4	0	3.1	4.4	0	7.5	0	0	0	3461600	0	0	4042400	0
633	Q8IWU5	Extracellular sulfatase Sulf-2 (hSulf-2) (EC 3.1.6.-)	SULF2 KIAA1247 UNQ559/PRO1120	Q8IWU5;B1AMP9	sp|Q8IWU5|SULF2_HUMAN Extracellular sulfatase Sulf-2 OS=Homo sapiens OX=9606 GN=SULF2 PE=1 SV=1;tr|B1AMP9|B1AMP9_HUMAN Extracellular sulfatase Sulf-2 (Fragment) OS=Homo sapiens OX=9606 GN=SULF2 PE=1 SV=1	2	5	5	3	5	5	1	1	2	5	3	5	3	5	5	1	1	2	5	3	5	9.4	9.4	100.45	870	0	156.66	5.1	9.4	9.4	1.7	1.4	2.3	9.4	4.7	9.4	129580000	237290000	160390000	10273000	11252000	20489000	186860000	38329000
634	Q8IWY4	Signal peptide, CUB and EGF-like domain-containing protein 1	SCUBE1	Q8IWY4	sp|Q8IWY4|SCUB1_HUMAN Signal peptide, CUB and EGF-like domain-containing protein 1 OS=Homo sapiens OX=9606 GN=SCUBE1 PE=1 SV=3	2	3	3	1	1	1	3	1	1	1	0	0	1	1	1	3	1	1	1	0	0	3.6	3.6	107.91	988	0	25.59	1.5	1.5	1.5	3.6	1.5	1.5	1.5	0	0	27719000	73410000	14808000	73336000	14863000	79043000	9026500	0
635	Q8IZJ3	C3 and PZP-like alpha-2-macroglobulin domain-containing protein 8	CPAMD8 KIAA1283	Q8IZJ3;M0QXH3;M0R0Z5;Q6NVW5;F8W7D1	sp|Q8IZJ3|CPMD8_HUMAN C3 and PZP-like alpha-2-macroglobulin domain-containing protein 8 OS=Homo sapiens OX=9606 GN=CPAMD8 PE=1 SV=2;tr|M0QXH3|M0QXH3_HUMAN C3 and PZP-like alpha-2-macroglobulin domain-containing protein 8 (Fragment) OS=Homo sapiens OX=9606	5	2	2	2	1	2	0	0	0	0	0	0	2	1	2	0	0	0	0	0	0	1.8	1.8	206.7	1885	0	14.42	1.8	0.6	1.8	0	0	0	0	0	0	7902000	8606100	0	0	0	0	0	0
352	Q8N294	cDNA FLJ33633 fis, clone BRAMY2022786, highly similar to Homo sapiens dickkopf-3 (DKK-3) mRNA		Q8N294;E9PKW6;B3KS70;B4DI69;Q6PQ81;F6SYF8;B4DID6;Q9UBP4;E9PKK9;O43532;E9PHY3	tr|Q8N294|Q8N294_HUMAN cDNA FLJ33633 fis, clone BRAMY2022786, highly similar to Homo sapiens dickkopf-3 (DKK-3) mRNA OS=Homo sapiens OX=9606 PE=2 SV=1;tr|E9PKW6|E9PKW6_HUMAN Dickkopf-related protein 3 (Fragment) OS=Homo sapiens OX=9606 GN=DKK3 PE=1 SV=8;tr	11	2	2	1	2	2	2	1	2	2	0	1	1	2	2	2	1	2	2	0	1	9.8	9.8	23.904	215	0	31.934	5.1	9.8	9.8	9.8	5.1	9.8	9.8	0	5.1	14262000	23770000	64300000	19510000	10772000	12081000	11777000	0
636	Q8N2E1	cDNA PSEC0226 fis, clone HEMBA1005833, moderately similar to Mus musculus carboxypeptidase X2 mRNA		Q8N2E1;Q96SM3;Q8N2F1;B4DZY4	tr|Q8N2E1|Q8N2E1_HUMAN cDNA PSEC0226 fis, clone HEMBA1005833, moderately similar to Mus musculus carboxypeptidase X2 mRNA OS=Homo sapiens OX=9606 PE=2 SV=1;sp|Q96SM3|CPXM1_HUMAN Probable carboxypeptidase X1 OS=Homo sapiens OX=9606 GN=CPXM1 PE=2 SV=2;tr|Q8N	4	2	2	0	0	0	2	0	0	1	1	0	0	0	0	2	0	0	1	1	0	4	4	52.765	477	0	16.661	0	0	0	4	0	0	2.3	2.3	0	0	0	0	6096900	0	0	11884000	13759000
565	Q8N6T2	GDF10 protein		Q8N6T2;P55107	tr|Q8N6T2|Q8N6T2_HUMAN GDF10 protein OS=Homo sapiens OX=9606 PE=2 SV=1;sp|P55107|GDF10_HUMAN Growth/differentiation factor 10 OS=Homo sapiens OX=9606 GN=GDF10 PE=2 SV=1	2	2	2	1	2	2	1	0	0	1	1	1	1	2	2	1	0	0	1	1	1	8	8	32.352	288	0	5.473	4.5	8	8	4.5	0	0	4.5	4.5	4.5	44822000	79508000	74115000	6436300	0	0	35528000	0
637	Q8N766	ER membrane protein complex subunit 1	EMC1 KIAA0090 PSEC0263	Q8N766	sp|Q8N766|EMC1_HUMAN ER membrane protein complex subunit 1 OS=Homo sapiens OX=9606 GN=EMC1 PE=1 SV=1	1	1	1	1	1	0	1	1	1	1	1	1	1	1	0	1	1	1	1	1	1	1	1	111.76	993	0	20.38	1	1	0	1	1	1	1	1	1	5772200	0	0	27143000	53332000	21797000	0	53874000
29	Q8N9Q8	cDNA FLJ36731 fis, clone UTERU2012703, highly similar to LAMININ BETA-2 CHAIN		Q8N9Q8;Q15483;A0A024R319;P55268	tr|Q8N9Q8|Q8N9Q8_HUMAN cDNA FLJ36731 fis, clone UTERU2012703, highly similar to LAMININ BETA-2 CHAIN OS=Homo sapiens OX=9606 PE=2 SV=1;tr|Q15483|Q15483_HUMAN S-laminin (Fragment) OS=Homo sapiens OX=9606 PE=2 SV=1;tr|A0A024R319|A0A024R319_HUMAN Laminin, bet	4	2	2	0	0	0	1	0	0	2	2	0	0	0	0	1	0	0	2	2	0	7.1	7.1	40.503	381	0	20.485	0	0	0	5	0	0	7.1	7.1	0	0	0	0	7763400	0	0	0	0
638	Q8NBJ5	Procollagen galactosyltransferase 1 (EC 2.4.1.50) (Collagen beta(1-O)galactosyltransferase 1) (ColGalT 1) (Glycosyltransferase 25 family member 1) (Hydroxylysine galactosyltransferase 1)	COLGALT1 GLT25D1 PSEC0241	Q8NBJ5	sp|Q8NBJ5|GT251_HUMAN Procollagen galactosyltransferase 1 OS=Homo sapiens OX=9606 GN=COLGALT1 PE=1 SV=1	1	1	1	0	0	0	1	0	0	1	1	1	0	0	0	1	0	0	1	1	1	3.1	3.1	71.635	622	0	29.755	0	0	0	3.1	0	0	3.1	3.1	3.1	0	0	0	23323000	0	0	20727000	34760000
639	Q8NCG5	Carbohydrate sulfotransferase 4 (EC 2.8.2.-) (Galactose/N-acetylglucosamine/N-acetylglucosamine 6-O-sulfotransferase 3) (GST-3) (High endothelial cells N-acetylglucosamine 6-O-sulfotransferase) (HEC-GlcNAc6ST) (L-selectin ligand sulfotransferase) (LSST) (N-acetylglucosamine 6-O-sulfotransferase 2) (GlcNAc6ST-2) (Gn6st-2)	CHST4	Q8NCG5	sp|Q8NCG5|CHST4_HUMAN Carbohydrate sulfotransferase 4 OS=Homo sapiens OX=9606 GN=CHST4 PE=1 SV=2	1	1	1	1	1	1	0	0	0	1	1	1	1	1	1	0	0	0	1	1	1	2.6	2.6	45.133	386	0	29.142	2.6	2.6	2.6	0	0	0	2.6	2.6	2.6	16438000	25590000	36057000	0	0	0	25213000	6938500
640	Q8NF17	FLJ00385 protein (Fragment)	FLJ00385	Q8NF17	tr|Q8NF17|Q8NF17_HUMAN FLJ00385 protein (Fragment) OS=Homo sapiens OX=9606 GN=FLJ00385 PE=1 SV=1	1	2	0	1	1	1	2	1	1	1	2	2	0	0	0	0	0	0	0	0	0	4.9	0	56.11	509	0	259.31	1.8	1.8	1.8	4.9	1.8	1.8	1.8	4.9	4.9	921250000	3142500000	885430000	3605900000	878850000	2636700000	907250000	3181700000
173	Q8NF80	FLJ00275 protein (Fragment)	FLJ00275	Q8NF80;A0A0G2JNY7;A0A0G2JMX5;A0A0G2JPM8;A0A0G2JNP3;O75023	tr|Q8NF80|Q8NF80_HUMAN FLJ00275 protein (Fragment) OS=Homo sapiens OX=9606 GN=FLJ00275 PE=2 SV=1;tr|A0A0G2JNY7|A0A0G2JNY7_HUMAN Leukocyte immunoglobulin-like receptor subfamily B member 5 OS=Homo sapiens OX=9606 GN=LILRB5 PE=1 SV=1;tr|A0A0G2JMX5|A0A0G2JMX5	6	1	1	0	0	0	1	0	0	0	0	0	0	0	0	1	0	0	0	0	0	7.9	7.9	41.051	382	0	11.682	0	0	0	7.9	0	0	0	0	0	0	0	0	4663900	0	0	0	0
641	Q8TCJ2	Dolichyl-diphosphooligosaccharide--protein glycosyltransferase subunit STT3B (Oligosaccharyl transferase subunit STT3B) (STT3-B) (EC 2.4.99.18) (Source of immunodominant MHC-associated peptides homolog)	STT3B SIMP	Q8TCJ2	sp|Q8TCJ2|STT3B_HUMAN Dolichyl-diphosphooligosaccharide--protein glycosyltransferase subunit STT3B OS=Homo sapiens OX=9606 GN=STT3B PE=1 SV=1	1	2	2	1	2	2	2	1	1	2	2	2	1	2	2	2	1	1	2	2	2	3.6	3.6	93.673	826	0	139.91	2.3	3.6	3.6	3.6	2.3	2.3	3.6	3.6	3.6	46839000	36418000	28476000	113380000	64566000	70614000	63955000	113950000
642	Q8WUJ3	Cell migration-inducing and hyaluronan-binding protein (EC 3.2.1.35)	CEMIP KIAA1199	Q8WUJ3	sp|Q8WUJ3|CEMIP_HUMAN Cell migration-inducing and hyaluronan-binding protein OS=Homo sapiens OX=9606 GN=CEMIP PE=1 SV=2	1	1	1	1	1	1	1	0	0	0	1	1	1	1	1	1	0	0	0	1	1	0.6	0.6	153	1361	0	2.3264	0.6	0.6	0.6	0.6	0	0	0	0.6	0.6	13590000	14510000	0	1607000	0	0	0	2691900
135	Q8WW96	CFHR3 protein	CFHR3	Q8WW96;A0A087WYK9;Q6NSD3;Q02985	tr|Q8WW96|Q8WW96_HUMAN CFHR3 protein OS=Homo sapiens OX=9606 GN=CFHR3 PE=2 SV=1;tr|A0A087WYK9|A0A087WYK9_HUMAN Complement factor H-related protein 3 OS=Homo sapiens OX=9606 GN=CFHR3 PE=1 SV=1;tr|Q6NSD3|Q6NSD3_HUMAN CFHR3 protein OS=Homo sapiens OX=9606 GN=	4	1	1	1	1	0	1	1	1	1	1	1	1	1	0	1	1	1	1	1	1	9.7	9.7	22.227	195	0	12.602	9.7	9.7	0	9.7	9.7	9.7	9.7	9.7	9.7	16323000	23306000	0	14606000	12855000	19219000	56322000	44057000
460	Q8WWJ8	Integrin beta		Q8WWJ8;Q59H50;D3DSM0;J3KNI6;B4E0R1;P05107	tr|Q8WWJ8|Q8WWJ8_HUMAN Integrin beta OS=Homo sapiens OX=9606 PE=2 SV=1;tr|Q59H50|Q59H50_HUMAN Integrin beta (Fragment) OS=Homo sapiens OX=9606 PE=2 SV=1;tr|D3DSM0|D3DSM0_HUMAN Integrin beta OS=Homo sapiens OX=9606 GN=ITGB2 PE=1 SV=1;tr|J3KNI6|J3KNI6_HUMAN	14	3	3	0	0	0	3	0	2	0	1	1	0	0	0	3	0	2	0	1	1	11.9	11.9	41.786	378	0	156.61	0	0	0	11.9	0	7.1	0	3.4	3.4	0	0	0	37339000	0	28256000	0	21832000
644	Q92542	Nicastrin	NCSTN KIAA0253 UNQ1874/PRO4317	Q92542;B4DR82;Q5T209;H0Y6T7	sp|Q92542|NICA_HUMAN Nicastrin OS=Homo sapiens OX=9606 GN=NCSTN PE=1 SV=2;tr|B4DR82|B4DR82_HUMAN cDNA FLJ60331, highly similar to Nicastrin OS=Homo sapiens OX=9606 PE=2 SV=1;tr|Q5T209|Q5T209_HUMAN Nicastrin (Fragment) OS=Homo sapiens OX=9606 GN=NCSTN PE=1	8	4	1	1	0	1	3	1	1	2	0	0	1	0	1	1	1	1	0	0	0	10.7	3.7	78.41	709	0	17.162	3.7	0	3.7	7.9	3.7	3.7	5.5	0	0	18458000	0	14469000	14019000	26588000	17939000	0	0
645	Q92626	Peroxidasin homolog (EC 1.11.1.7) (Melanoma-associated antigen MG50) (Vascular peroxidase 1) (p53-responsive gene 2 protein)	PXDN KIAA0230 MG50 PRG2 VPO VPO1	Q92626	sp|Q92626|PXDN_HUMAN Peroxidasin homolog OS=Homo sapiens OX=9606 GN=PXDN PE=1 SV=2	2	3	3	0	0	0	3	0	2	2	3	2	0	0	0	3	0	2	2	3	2	2.6	2.6	165.27	1479	0	33.894	0	0	0	2.6	0	1.8	1.8	2.6	1.8	0	0	0	68081000	0	44934000	27701000	128900000
396	Q92791	Endoplasmic reticulum protein SC65 (Leprecan-like protein 4) (Nucleolar autoantigen No55) (Prolyl 3-hydroxylase family member 4) (Synaptonemal complex protein SC65)	P3H4 LEPREL4 NOL55 SC65	Q92791;B4DVZ5;K7ERA3	sp|Q92791|SC65_HUMAN Endoplasmic reticulum protein SC65 OS=Homo sapiens OX=9606 GN=P3H4 PE=1 SV=1;tr|B4DVZ5|B4DVZ5_HUMAN cDNA FLJ53481, highly similar to Nucleolar autoantigen No55 OS=Homo sapiens OX=9606 PE=2 SV=1;tr|K7ERA3|K7ERA3_HUMAN Endoplasmic reticu	3	2	2	0	0	0	2	1	1	1	1	2	0	0	0	2	1	1	1	1	2	8.9	8.9	50.381	437	0	67.105	0	0	0	8.9	3.2	3.2	3.2	3.2	8.9	0	0	0	0	11211000	15684000	53165000	82358000
646	Q92859	Neogenin (Immunoglobulin superfamily DCC subclass member 2)	NEO1 IGDCC2 NGN	Q92859;Q59FP8;A0A024R610	sp|Q92859|NEO1_HUMAN Neogenin OS=Homo sapiens OX=9606 GN=NEO1 PE=1 SV=2;tr|Q59FP8|Q59FP8_HUMAN Neogenin homolog 1 variant (Fragment) OS=Homo sapiens OX=9606 GN=NEO1 PE=1 SV=1;tr|A0A024R610|A0A024R610_HUMAN Neogenin homolog 1 (Chicken), isoform CRA_a OS=Hom	3	2	2	0	0	0	1	0	0	1	0	0	0	0	0	1	0	0	1	0	0	2.4	2.4	160.01	1461	0	10.53	0	0	0	1.2	0	0	1.2	0	0	0	0	0	6905200	0	0	0	0
647	Q92896	Golgi apparatus protein 1 (CFR-1) (Cysteine-rich fibroblast growth factor receptor) (E-selectin ligand 1) (ESL-1) (Golgi sialoglycoprotein MG-160)	GLG1 CFR1 ESL1 MG160	Q92896;H3BQU9;H3BM42	sp|Q92896|GSLG1_HUMAN Golgi apparatus protein 1 OS=Homo sapiens OX=9606 GN=GLG1 PE=1 SV=2;tr|H3BQU9|H3BQU9_HUMAN Golgi apparatus protein 1 OS=Homo sapiens OX=9606 GN=GLG1 PE=1 SV=1;tr|H3BM42|H3BM42_HUMAN Golgi apparatus protein 1, isoform CRA_c OS=Homo sap	5	3	3	0	0	0	1	1	2	1	2	1	0	0	0	1	1	2	1	2	1	2.5	2.5	134.55	1179	0	4.1918	0	0	0	1.2	1.2	1.9	0.7	1.9	0.7	0	0	0	25223000	28285000	29692000	0	0
648	Q969P0	Immunoglobulin superfamily member 8 (IgSF8) (CD81 partner 3) (Glu-Trp-Ile EWI motif-containing protein 2) (EWI-2) (Keratinocytes-associated transmembrane protein 4) (KCT-4) (LIR-D1) (Prostaglandin regulatory-like protein) (PGRL) (CD antigen CD316)	IGSF8 CD81P3 EWI2 KCT4	Q969P0	sp|Q969P0|IGSF8_HUMAN Immunoglobulin superfamily member 8 OS=Homo sapiens OX=9606 GN=IGSF8 PE=1 SV=1	1	2	2	1	0	0	2	1	0	0	0	0	1	0	0	2	1	0	0	0	0	5.7	5.7	65.033	613	0	7.1307	2.1	0	0	5.7	2.1	0	0	0	0	0	0	0	6280700	13477000	0	0	0
649	Q96HE7	ERO1-like protein alpha (ERO1-L) (ERO1-L-alpha) (EC 1.8.4.-) (Endoplasmic oxidoreductin-1-like protein) (Endoplasmic reticulum oxidoreductase alpha) (Oxidoreductin-1-L-alpha)	ERO1A ERO1L UNQ434/PRO865	Q96HE7	sp|Q96HE7|ERO1A_HUMAN ERO1-like protein alpha OS=Homo sapiens OX=9606 GN=ERO1A PE=1 SV=2	1	1	1	1	1	0	1	1	1	0	1	0	1	1	0	1	1	1	0	1	0	2.4	2.4	54.392	468	0	33.36	2.4	2.4	0	2.4	2.4	2.4	0	2.4	0	0	12764000	0	33627000	0	15044000	0	22923000
472	Q96HU3	FAM38A protein	FAM38A	Q96HU3;E7EUT2;M4QHP2;Q92508	tr|Q96HU3|Q96HU3_HUMAN FAM38A protein OS=Homo sapiens OX=9606 GN=FAM38A PE=2 SV=2;tr|E7EUT2|E7EUT2_HUMAN Piezo-type mechanosensitive ion channel component 1 OS=Homo sapiens OX=9606 GN=PIEZO1 PE=1 SV=1;tr|M4QHP2|M4QHP2_HUMAN Piezo-type mechanosensitive ion	4	1	1	0	0	0	0	0	0	0	1	0	0	0	0	0	0	0	0	1	0	3.2	3.2	41.258	373	0	2.0251	0	0	0	0	0	0	0	3.2	0	0	0	0	0	0	0	0	7057800
650	Q96JB6	Lysyl oxidase homolog 4 (EC 1.4.3.-) (Lysyl oxidase-like protein 4) (Lysyl oxidase-related protein C)	LOXL4 LOXC	Q96JB6	sp|Q96JB6|LOXL4_HUMAN Lysyl oxidase homolog 4 OS=Homo sapiens OX=9606 GN=LOXL4 PE=1 SV=1	1	1	1	0	0	0	0	0	1	0	0	0	0	0	0	0	0	1	0	0	0	2.6	2.6	84.483	756	0	1.8783	0	0	0	0	0	2.6	0	0	0	0	0	0	0	0	22434000	0	0
651	Q96JQ0	Protocadherin-16 (Cadherin-19) (Cadherin-25) (Fibroblast cadherin-1) (Protein dachsous homolog 1)	DCHS1 CDH19 CDH25 FIB1 KIAA1773 PCDH16	Q96JQ0	sp|Q96JQ0|PCD16_HUMAN Protocadherin-16 OS=Homo sapiens OX=9606 GN=DCHS1 PE=1 SV=1	1	1	1	0	0	0	0	0	0	0	1	0	0	0	0	0	0	0	0	1	0	0.4	0.4	346.18	3298	0.0051107	0.88875	0	0	0	0	0	0	0	0.4	0	0	0	0	0	0	0	0	0
147	Q96JW9	cDNA FLJ14925 fis, clone PLACE1008643, weakly similar to INTER-ALPHA-TRYPSIN INHIBITOR HEAVY CHAIN H2		Q96JW9;Q96JV8;G5E9D8;A0A096LP62;C9J2H1;Q86UX2	tr|Q96JW9|Q96JW9_HUMAN cDNA FLJ14925 fis, clone PLACE1008643, weakly similar to INTER-ALPHA-TRYPSIN INHIBITOR HEAVY CHAIN H2 OS=Homo sapiens OX=9606 PE=2 SV=1;tr|Q96JV8|Q96JV8_HUMAN cDNA FLJ14943 fis, clone PLACE1011371, weakly similar to INTER-ALPHA-TRYPS	6	1	1	1	0	1	1	0	0	1	1	1	1	0	1	1	0	0	1	1	1	4.3	4.3	44.345	397	0	12.962	4.3	0	4.3	4.3	0	0	4.3	4.3	4.3	29291000	0	21009000	14038000	0	0	21865000	20180000
652	Q96PD5	N-acetylmuramoyl-L-alanine amidase (EC 3.5.1.28) (Peptidoglycan recognition protein 2) (Peptidoglycan recognition protein long) (PGRP-L)	PGLYRP2 PGLYRPL PGRPL UNQ3103/PRO10102	Q96PD5	sp|Q96PD5|PGRP2_HUMAN N-acetylmuramoyl-L-alanine amidase OS=Homo sapiens OX=9606 GN=PGLYRP2 PE=1 SV=1	1	2	2	1	1	1	2	1	1	0	1	1	1	1	1	2	1	1	0	1	1	8	8	62.216	576	0	168.91	3.6	3.6	3.6	8	3.6	3.6	0	3.6	3.6	31286000	55854000	26579000	60024000	46160000	75411000	0	21658000
457	Q96PQ9	Lysyl oxidase	LOX	Q96PQ9;D0PNI2;P28300	tr|Q96PQ9|Q96PQ9_HUMAN Lysyl oxidase OS=Homo sapiens OX=9606 GN=LOX PE=4 SV=1;tr|D0PNI2|D0PNI2_HUMAN Lysyl oxidase OS=Homo sapiens OX=9606 GN=LOX PE=4 SV=1;sp|P28300|LYOX_HUMAN Protein-lysine 6-oxidase OS=Homo sapiens OX=9606 GN=LOX PE=1 SV=2	4	3	3	2	2	2	1	3	3	2	2	2	2	2	2	1	3	3	2	2	2	9.6	9.6	46.97	417	0	42.307	9.6	9.6	9.6	4.6	9.6	9.6	4.6	4.6	4.6	45260000	37514000	80912000	25250000	113550000	70375000	44657000	42543000
653	Q96RW7	Hemicentin-1 (Fibulin-6) (FIBL-6)	HMCN1 FIBL6	Q96RW7	sp|Q96RW7|HMCN1_HUMAN Hemicentin-1 OS=Homo sapiens OX=9606 GN=HMCN1 PE=1 SV=2	1	2	2	0	1	0	2	0	0	0	0	0	0	1	0	2	0	0	0	0	0	0.4	0.4	613.38	5635	0	2.2487	0	0.2	0	0.4	0	0	0	0	0	0	0	0	9905500	0	0	0	0
656	Q9BU23	Lipase maturation factor 2 (Transmembrane protein 112B) (Transmembrane protein 153)	LMF2 TMEM112B TMEM153	Q9BU23	sp|Q9BU23|LMF2_HUMAN Lipase maturation factor 2 OS=Homo sapiens OX=9606 GN=LMF2 PE=1 SV=2	1	1	1	0	0	0	1	1	0	1	1	0	0	0	0	1	1	0	1	1	0	2	2	79.697	707	0	82.855	0	0	0	2	2	0	2	2	0	0	0	0	11432000	8381900	0	9987600	22689000
657	Q9BXX0	EMILIN-2 (Elastin microfibril interface-located protein 2) (Elastin microfibril interfacer 2) (Protein FOAP-10)	EMILIN2	Q9BXX0	sp|Q9BXX0|EMIL2_HUMAN EMILIN-2 OS=Homo sapiens OX=9606 GN=EMILIN2 PE=1 SV=3	1	2	2	0	0	0	2	0	0	0	1	0	0	0	0	2	0	0	0	1	0	3	3	115.69	1053	0	25.467	0	0	0	3	0	0	0	2.3	0	0	0	0	47415000	0	0	0	17028000
658	Q9BY76	Angiopoietin-related protein 4 (Angiopoietin-like protein 4) (Hepatic fibrinogen/angiopoietin-related protein) (HFARP) [Cleaved into: ANGPTL4 N-terminal chain; ANGPTL4 C-terminal chain]	ANGPTL4 ARP4 HFARP PGAR PP1158 PSEC0166 UNQ171/PRO197	Q9BY76	sp|Q9BY76|ANGL4_HUMAN Angiopoietin-related protein 4 OS=Homo sapiens OX=9606 GN=ANGPTL4 PE=1 SV=2	1	2	2	1	2	2	1	1	1	0	1	0	1	2	2	1	1	1	0	1	0	4.2	4.2	45.214	406	0	13.841	3.9	4.2	4.2	3.9	3.9	3.9	0	3.9	0	49372000	77905000	50909000	20831000	22973000	44491000	0	0
659	Q9H3R7	Dickkopf homolog 2 (Xenopus laevis), isoform CRA_a (Dickkopf-2 variant)	DKK2 hCG_19901	Q9H3R7;Q9UBU2	tr|Q9H3R7|Q9H3R7_HUMAN Dickkopf homolog 2 (Xenopus laevis), isoform CRA_a OS=Homo sapiens OX=9606 GN=DKK2 PE=2 SV=1;sp|Q9UBU2|DKK2_HUMAN Dickkopf-related protein 2 OS=Homo sapiens OX=9606 GN=DKK2 PE=2 SV=1	2	1	1	0	1	0	0	0	0	1	0	0	0	1	0	0	0	0	1	0	0	7.4	7.4	20.345	188	0	7.3045	0	7.4	0	0	0	0	7.4	0	0	0	6793300	0	0	0	0	2964000	0
206	Q9H9K4	cDNA FLJ12685 fis, clone NT2RM4002493		Q9H9K4;Q9H9G5;A0A185QE25;A8K1W7;Q8NFY4	tr|Q9H9K4|Q9H9K4_HUMAN cDNA FLJ12685 fis, clone NT2RM4002493 OS=Homo sapiens OX=9606 PE=2 SV=1;tr|Q9H9G5|Q9H9G5_HUMAN cDNA FLJ12769 fis, clone NT2RP2001581 OS=Homo sapiens OX=9606 PE=2 SV=1;tr|A0A185QE25|A0A185QE25_HUMAN Semaphorin-6D isoform 8 OS=Homo sap	5	1	1	0	0	0	1	0	0	1	0	1	0	0	0	1	0	0	1	0	1	3.8	3.8	49.681	451	0.0064725	0.69607	0	0	0	3.8	0	0	3.8	0	3.8	0	0	0	13022000	0	0	0	0
26	Q9HBQ7	Cathepsin L, isoform CRA_b	CTSL hCG_30369	Q9HBQ7;Q6LAF7;B3KQK4;A5PLM9;A0A024R276;P07711	tr|Q9HBQ7|Q9HBQ7_HUMAN Cathepsin L, isoform CRA_b OS=Homo sapiens OX=9606 GN=CTSL PE=2 SV=1;tr|Q6LAF7|Q6LAF7_HUMAN Cathepsin L (Fragment) OS=Homo sapiens OX=9606 PE=2 SV=1;tr|B3KQK4|B3KQK4_HUMAN cDNA FLJ90619 fis, clone PLACE1002374, highly similar to Cath	6	1	1	1	0	1	1	0	0	1	0	1	1	0	1	1	0	0	1	0	1	9.3	9.3	16.838	151	0	7.4042	9.3	0	9.3	9.3	0	0	9.3	0	9.3	12688000	0	14353000	14381000	0	0	8577600	0
660	Q9HCB6	Spondin-1 (F-spondin) (Vascular smooth muscle cell growth-promoting factor)	SPON1 KIAA0762 VSGP	Q9HCB6	sp|Q9HCB6|SPON1_HUMAN Spondin-1 OS=Homo sapiens OX=9606 GN=SPON1 PE=1 SV=2	1	1	1	0	0	0	0	0	0	0	1	0	0	0	0	0	0	0	0	1	0	1.2	1.2	90.973	807	0	2.1778	0	0	0	0	0	0	0	1.2	0	0	0	0	0	0	0	0	10377000
661	Q9NP29	Microfibrillar protein 2 (Fragment)		Q9NP29	tr|Q9NP29|Q9NP29_HUMAN Microfibrillar protein 2 (Fragment) OS=Homo sapiens OX=9606 PE=2 SV=1	1	1	1	0	0	0	0	0	0	1	0	1	0	0	0	0	0	0	1	0	1	13.8	13.8	13.688	130	1	-2	0	0	0	0	0	0	13.8	0	13.8	0	0	0	0	0	0	35666000	0
662	Q9NR99	Matrix-remodeling-associated protein 5 (Adhesion protein with leucine-rich repeats and immunoglobulin domains related to perlecan) (Adlican)	MXRA5	Q9NR99	sp|Q9NR99|MXRA5_HUMAN Matrix-remodeling-associated protein 5 OS=Homo sapiens OX=9606 GN=MXRA5 PE=1 SV=3	1	9	9	1	1	0	7	5	5	4	7	4	1	1	0	7	5	5	4	7	4	3.7	3.7	312.15	2828	0	264.85	0.4	0.4	0	3.3	2.2	2.4	1.2	3.1	1.4	7747500	13179000	0	324870000	156380000	244860000	189280000	217280000
663	Q9NT22	EMILIN-3 (EMILIN-5) (Elastin microfibril interface-located protein 3) (Elastin microfibril interfacer 3) (Elastin microfibril interface-located protein 5) (Elastin microfibril interfacer 5)	EMILIN3 C20orf130 EMILIN5	Q9NT22	sp|Q9NT22|EMIL3_HUMAN EMILIN-3 OS=Homo sapiens OX=9606 GN=EMILIN3 PE=1 SV=2	1	3	3	1	2	2	1	0	0	1	1	0	1	2	2	1	0	0	1	1	0	10.1	10.1	82.646	766	0	139.61	1.6	6.7	5	1.6	0	0	1.6	1.6	0	56131000	56524000	108340000	2420000	0	0	36594000	19016000
6	Q9P073	HSPC309 (Fragment)		Q9P073;B3KXD2;Q9BVC1;A0A024QZ14;Q96IR5;B4DLL0;Q8NBL9;B2RBB2;Q96S52	tr|Q9P073|Q9P073_HUMAN HSPC309 (Fragment) OS=Homo sapiens OX=9606 PE=2 SV=1;tr|B3KXD2|B3KXD2_HUMAN cDNA FLJ45226 fis, clone BRCAN2020412, highly similar to GPI transamidase component PIG-S OS=Homo sapiens OX=9606 PE=2 SV=1;tr|Q9BVC1|Q9BVC1_HUMAN PIGS prote	9	1	1	0	0	0	1	0	0	1	1	0	0	0	0	1	0	0	1	1	0	6.2	6.2	17.607	162	0.0053286	1.2171	0	0	0	6.2	0	0	6.2	6.2	0	0	0	0	3655100	0	0	0	0
287	Q9P255	Zinc finger protein 492 (Zinc finger protein 115)	ZNF492 KIAA1473 ZNF115	Q9P255;A6NK75	sp|Q9P255|ZN492_HUMAN Zinc finger protein 492 OS=Homo sapiens OX=9606 GN=ZNF492 PE=2 SV=2;sp|A6NK75|ZNF98_HUMAN Zinc finger protein 98 OS=Homo sapiens OX=9606 GN=ZNF98 PE=2 SV=4	2	1	1	1	1	1	1	0	1	1	1	1	1	1	1	1	0	1	1	1	1	3.6	3.6	61.158	531	0	12.433	3.6	3.6	3.6	3.6	0	3.6	3.6	3.6	3.6	2570500000	47449000	1705100000	522810000	0	0	652300000	391450000
664	Q9P266	Junctional protein associated with coronary artery disease (JCAD)	JCAD KIAA1462	Q9P266	sp|Q9P266|JCAD_HUMAN Junctional protein associated with coronary artery disease OS=Homo sapiens OX=9606 GN=JCAD PE=1 SV=3	1	1	1	0	1	1	0	0	1	1	0	0	0	1	1	0	0	1	1	0	0	0.9	0.9	148.35	1359	0.0051813	1.0164	0	0.9	0.9	0	0	0.9	0.9	0	0	0	445400000	84293000	0	0	100680000	56528000	0
665	Q9UBG0	C-type mannose receptor 2 (C-type lectin domain family 13 member E) (Endocytic receptor 180) (Macrophage mannose receptor 2) (Urokinase-type plasminogen activator receptor-associated protein) (UPAR-associated protein) (Urokinase receptor-associated protein) (CD antigen CD280)	MRC2 CLEC13E ENDO180 KIAA0709 UPARAP	Q9UBG0	sp|Q9UBG0|MRC2_HUMAN C-type mannose receptor 2 OS=Homo sapiens OX=9606 GN=MRC2 PE=1 SV=2	1	6	6	1	2	0	6	4	4	5	6	4	1	2	0	6	4	4	5	6	4	5.6	5.6	166.67	1479	0	323.31	0.9	1.9	0	5.6	3.6	3.6	3.7	5.6	3.6	12545000	31760000	0	380160000	228100000	176440000	181380000	259880000
666	Q9UBV2	Protein sel-1 homolog 1 (Suppressor of lin-12-like protein 1) (Sel-1L)	SEL1L TSA305 UNQ128/PRO1063	Q9UBV2	sp|Q9UBV2|SE1L1_HUMAN Protein sel-1 homolog 1 OS=Homo sapiens OX=9606 GN=SEL1L PE=1 SV=3	1	2	2	0	0	0	2	0	0	2	2	2	0	0	0	2	0	0	2	2	2	4.3	4.3	88.754	794	0	10.702	0	0	0	4.3	0	0	4.3	4.3	4.3	0	0	0	38662000	0	0	42013000	58517000
667	Q9UFM8	Neuroplastin (Fragment)	NPTN DKFZp566H1924	Q9UFM8;Q9Y639;Q9Y499	tr|Q9UFM8|Q9UFM8_HUMAN Neuroplastin (Fragment) OS=Homo sapiens OX=9606 GN=NPTN PE=1 SV=2;sp|Q9Y639|NPTN_HUMAN Neuroplastin OS=Homo sapiens OX=9606 GN=NPTN PE=1 SV=2;tr|Q9Y499|Q9Y499_HUMAN Homo sapiens clone 23742 (Fragment) OS=Homo sapiens OX=9606 PE=2 SV=	6	5	5	2	2	1	3	2	1	4	3	3	2	2	1	3	2	1	4	3	3	18.8	18.8	34.815	308	0	266.21	11.4	11.4	2.6	9.7	5.5	2.6	14.3	11.7	5.5	32226000	73045000	39385000	78800000	295110000	151270000	61123000	86399000
311	Q9UH97	Hematopoietic progenitor cell antigen CD34 (Fragment)	CD34	Q9UH97;B4DG27;Q8IUM0;Q3C1E7;B4DUX4;A8KAG5;P28906	tr|Q9UH97|Q9UH97_HUMAN Hematopoietic progenitor cell antigen CD34 (Fragment) OS=Homo sapiens OX=9606 GN=CD34 PE=2 SV=1;tr|B4DG27|B4DG27_HUMAN cDNA FLJ53734, highly similar to Hematopoietic progenitor cell antigen CD34 OS=Homo sapiens OX=9606 PE=2 SV=1;tr|Q	7	1	1	0	0	0	1	0	0	1	0	0	0	0	0	1	0	0	1	0	0	5.7	5.7	20.709	193	0	7.1984	0	0	0	5.7	0	0	5.7	0	0	0	0	0	0	0	0	0	0
668	Q9UHL4	Dipeptidyl peptidase 2 (EC 3.4.14.2) (Dipeptidyl aminopeptidase II) (Dipeptidyl peptidase 7) (Dipeptidyl peptidase II) (DPP II) (Quiescent cell proline dipeptidase)	DPP7 DPP2 QPP	Q9UHL4	sp|Q9UHL4|DPP2_HUMAN Dipeptidyl peptidase 2 OS=Homo sapiens OX=9606 GN=DPP7 PE=1 SV=3	1	1	1	1	1	1	1	1	1	1	1	1	1	1	1	1	1	1	1	1	1	4.1	4.1	54.341	492	0	88.824	4.1	4.1	4.1	4.1	4.1	4.1	4.1	4.1	4.1	30708000	25634000	12263000	19185000	11280000	11865000	32733000	19557000
564	Q9UIU0	Dihydropyridine receptor alpha 2 subunit	CACNA2D1	Q9UIU0;P54289;Q9UDQ3	tr|Q9UIU0|Q9UIU0_HUMAN Dihydropyridine receptor alpha 2 subunit OS=Homo sapiens OX=9606 GN=CACNA2D1 PE=4 SV=1;sp|P54289|CA2D1_HUMAN Voltage-dependent calcium channel subunit alpha-2/delta-1 OS=Homo sapiens OX=9606 GN=CACNA2D1 PE=1 SV=3;tr|Q9UDQ3|Q9UDQ3_HUM	7	4	4	0	0	1	4	1	1	0	0	1	0	0	1	4	1	1	0	0	1	4.9	4.9	125.31	1110	0	27.11	0	0	1.2	4.9	0.8	0.8	0	0	0.8	0	0	6867400	37495000	29271000	25145000	0	0
67	Q9UKU9	Angiopoietin-related protein 2 (Angiopoietin-like protein 2)	ANGPTL2 ARP2 UNQ170/PRO196	Q9UKU9;A0A024R868;B2R780	sp|Q9UKU9|ANGL2_HUMAN Angiopoietin-related protein 2 OS=Homo sapiens OX=9606 GN=ANGPTL2 PE=1 SV=1;tr|A0A024R868|A0A024R868_HUMAN Angiopoietin-like 2, isoform CRA_a OS=Homo sapiens OX=9606 GN=ANGPTL2 PE=4 SV=1;tr|B2R780|B2R780_HUMAN cDNA, FLJ93320, highly s	3	2	2	2	2	2	2	2	2	2	2	2	2	2	2	2	2	2	2	2	2	7.7	7.7	57.104	493	0	323.31	7.7	7.7	7.7	7.7	7.7	7.7	7.7	7.7	7.7	2389000000	2148400000	1882300000	303550000	313240000	587520000	900880000	430880000
670	Q9UPN7	Serine/threonine-protein phosphatase 6 regulatory subunit 1 (SAPS domain family member 1)	PPP6R1 KIAA1115 PP6R1 SAPS1	Q9UPN7	sp|Q9UPN7|PP6R1_HUMAN Serine/threonine-protein phosphatase 6 regulatory subunit 1 OS=Homo sapiens OX=9606 GN=PPP6R1 PE=1 SV=5	1	1	1	0	0	0	1	1	1	1	1	0	0	0	0	1	1	1	1	1	0	1.2	1.2	96.723	881	0.0096308	0.67052	0	0	0	1.2	1.2	1.2	1.2	1.2	0	0	0	0	6551800	6943700	9100700	0	11294000
671	Q9Y6C2	EMILIN-1 (Elastin microfibril interface-located protein 1) (Elastin microfibril interfacer 1)	EMILIN1 EMI	Q9Y6C2;A0A0A0MT20	sp|Q9Y6C2|EMIL1_HUMAN EMILIN-1 OS=Homo sapiens OX=9606 GN=EMILIN1 PE=1 SV=3;tr|A0A0A0MT20|A0A0A0MT20_HUMAN EMILIN-1 (Fragment) OS=Homo sapiens OX=9606 GN=EMILIN1 PE=1 SV=1	2	4	4	3	4	4	4	1	3	4	3	4	3	4	4	4	1	3	4	3	4	5.3	5.3	106.69	1016	0	323.31	4.6	5.3	5.3	5.3	1.4	4.6	5.3	3.5	5.3	1209500000	650470000	1082400000	855530000	472280000	443610000	616260000	543000000
25	S5MD53	Neurotrophic tyrosine receptor kinase type 2 (Fragment)		S5MD53;Q5VWE5;Q548C2;A0A024R230;Q16620	tr|S5MD53|S5MD53_HUMAN Neurotrophic tyrosine receptor kinase type 2 (Fragment) OS=Homo sapiens OX=9606 PE=2 SV=1;tr|Q5VWE5|Q5VWE5_HUMAN Neurotrophic tyrosine kinase, receptor, type 2, isoform CRA_a OS=Homo sapiens OX=9606 GN=NTRK2 PE=2 SV=1;tr|Q548C2|Q548C	5	2	2	0	0	0	2	1	0	1	2	1	0	0	0	2	1	0	1	2	1	34.3	34.3	7.4671	70	0	6.329	0	0	0	34.3	18.6	0	15.7	34.3	15.7	0	0	0	6025800	10162000	0	7254200	5582600
105	U3KPX5	Integrin beta-like protein 1 (Fragment)	ITGBL1	U3KPX5;B4DN32;A0A087WXI7;O14549;A0A087WY35;A0A024RDW7;O95965	tr|U3KPX5|U3KPX5_HUMAN Integrin beta-like protein 1 (Fragment) OS=Homo sapiens OX=9606 GN=ITGBL1 PE=1 SV=1;tr|B4DN32|B4DN32_HUMAN cDNA FLJ60311, highly similar to Homo sapiens integrin, beta-like 1 (with EGF-like repeat domains) (ITGBL1), mRNA OS=Homo sapi	7	2	2	0	0	0	2	0	1	1	0	0	0	0	0	2	0	1	1	0	0	4.8	4.8	22.52	208	0	216.71	0	0	0	4.8	0	4.8	4.8	0	0	0	0	0	17273000	0	0	45589000	0
109	V5NQS1	Truncated MHC class I antigen	HLA-C	V5NQS1;G1EQC2;A0A0K0KR97;H9C5J0;H9C5H7;H9BQ95;A0A0K0KRK8;H8WR61;H6V7S2;H6V7S1;H6V082;I7AY96;G1EQ73;I6NS41;G1EQA3;F8R8K6;F8R8K5;F8R8K4;F6KS03;F6KRV3;A0A0X7YJ25;F8RHH5;A0A109NRE5;I6NS46;I6MHI2;I6TF04;D6ML98;G1EQK7;A0A0F7RNH7;A0A110AZI3;E3Q0X7;A0A0K0KSD4;G9I2M2;G9HWA4;G9HW59;G3D6G1;G3D6D4;G3D6C1;I7API5;D5FZQ8;G1EQK6;G1EQJ7;G1EQG1;G1EQF4;G1EQF0;A0A0K0KS97;A0A2U7NGY5;H2DMK1;H6A2F9;G3D6C0;A0A0B5CZ67;A0…	tr|V5NQS1|V5NQS1_HUMAN Truncated MHC class I antigen OS=Homo sapiens OX=9606 GN=HLA-C PE=3 SV=1;tr|G1EQC2|G1EQC2_HUMAN MHC class I antigen (Fragment) OS=Homo sapiens OX=9606 GN=HLA-C PE=3 SV=1;tr|A0A0K0KR97|A0A0K0KR97_HUMAN MHC class I antigen (Fragment) O	408	1	1	0	0	0	1	0	0	0	0	0	0	0	0	1	0	0	0	0	0	5.8	5.8	18.007	156	0	1.6023	0	0	0	5.8	0	0	0	0	0	0	0	0	16252000	0	0	0	0
273	V9GYR2	Sodium/potassium-transporting ATPase subunit beta (Fragment)	ATP1B1	V9GYR2;B7Z9S8;A6NGH2;Q6LEU2;A3KLL5;P05026	tr|V9GYR2|V9GYR2_HUMAN Sodium/potassium-transporting ATPase subunit beta (Fragment) OS=Homo sapiens OX=9606 GN=ATP1B1 PE=1 SV=1;tr|B7Z9S8|B7Z9S8_HUMAN Sodium/potassium-transporting ATPase subunit beta OS=Homo sapiens OX=9606 PE=2 SV=1;tr|A6NGH2|A6NGH2_HUMA	6	1	1	1	1	1	1	0	0	1	1	1	1	1	1	1	0	0	1	1	1	13.8	13.8	15.125	130	0	187.19	13.8	13.8	13.8	13.8	0	0	13.8	13.8	13.8	0	55525000	47798000	44867000	0	0	209880000	161670000
585	V9HW95	Epididymis secretory protein Li 84	HEL-S-84	V9HW95;Q15293	tr|V9HW95|V9HW95_HUMAN Epididymis secretory protein Li 84 OS=Homo sapiens OX=9606 GN=HEL-S-84 PE=2 SV=1;sp|Q15293|RCN1_HUMAN Reticulocalbin-1 OS=Homo sapiens OX=9606 GN=RCN1 PE=1 SV=1	2	1	1	0	0	1	1	0	0	1	1	1	0	0	1	1	0	0	1	1	1	8.8	8.8	38.89	331	0	103.28	0	0	8.8	8.8	0	0	8.8	8.8	8.8	0	0	29126000	47343000	0	0	70430000	132430000
552	V9HWC6	Peptidyl-prolyl cis-trans isomerase (PPIase) (EC 5.2.1.8)	HEL-S-39	V9HWC6;P23284	tr|V9HWC6|V9HWC6_HUMAN Peptidyl-prolyl cis-trans isomerase OS=Homo sapiens OX=9606 GN=HEL-S-39 PE=2 SV=1;sp|P23284|PPIB_HUMAN Peptidyl-prolyl cis-trans isomerase B OS=Homo sapiens OX=9606 GN=PPIB PE=1 SV=2	2	1	1	1	1	1	0	0	0	1	0	1	1	1	1	0	0	0	1	0	1	6.2	6.2	22.742	208	0	125.71	6.2	6.2	6.2	0	0	0	6.2	0	6.2	23784000	27507000	28857000	0	0	0	9077900	0
525	V9HWF6	Alpha-1-acid glycoprotein	HEL-S-153w	V9HWF6;P02763	tr|V9HWF6|V9HWF6_HUMAN Alpha-1-acid glycoprotein OS=Homo sapiens OX=9606 GN=HEL-S-153w PE=2 SV=1;sp|P02763|A1AG1_HUMAN Alpha-1-acid glycoprotein 1 OS=Homo sapiens OX=9606 GN=ORM1 PE=1 SV=1	2	2	2	1	1	1	1	1	2	1	1	1	1	1	1	1	1	2	1	1	1	10.9	10.9	23.511	201	0	323.31	7.5	7.5	7.5	7.5	7.5	10.9	7.5	7.5	7.5	249560000	1372900000	970160000	478510000	240840000	530980000	468840000	516900000
524	V9HWP0	Pentaxin (Pentraxin)	HEL-S-92n APCS hCG_39427	V9HWP0;P02743	tr|V9HWP0|V9HWP0_HUMAN Pentaxin OS=Homo sapiens OX=9606 GN=HEL-S-92n PE=2 SV=1;sp|P02743|SAMP_HUMAN Serum amyloid P-component OS=Homo sapiens OX=9606 GN=APCS PE=1 SV=2	2	1	1	1	1	1	0	0	1	0	0	0	1	1	1	0	0	1	0	0	0	11.2	11.2	25.387	223	0	87.929	11.2	11.2	11.2	0	0	11.2	0	0	0	380820000	183380000	128660000	0	0	110620000	0	0
684	W0UUR6	Ribonuclease A F1 (Ribonuclease, RNase A family, 3 (Eosinophil cationic protein))	RAF1 RNASE3 hCG_40478	W0UUR6	tr|W0UUR6|W0UUR6_HUMAN Ribonuclease A F1 OS=Homo sapiens OX=9606 GN=RAF1 PE=3 SV=1	1	1	1	1	0	1	1	0	0	0	0	1	1	0	1	1	0	0	0	0	1	12.5	12.5	18.44	160	0	3.7205	12.5	0	12.5	12.5	0	0	0	0	12.5	68027000	0	54865000	7199900	0	0	0	0
540	X6R5C5	Carboxypeptidase (EC 3.4.16.-)	CTSA	X6R5C5;Q59EV6;X6R8A1;P10619	tr|X6R5C5|X6R5C5_HUMAN Carboxypeptidase OS=Homo sapiens OX=9606 GN=CTSA PE=1 SV=1;tr|Q59EV6|Q59EV6_HUMAN Carboxypeptidase (Fragment) OS=Homo sapiens OX=9606 GN=PPGB PE=2 SV=1;tr|X6R8A1|X6R8A1_HUMAN Carboxypeptidase OS=Homo sapiens OX=9606 GN=CTSA PE=1 SV=1	4	1	1	0	0	0	1	0	0	0	0	0	0	0	0	1	0	0	0	0	0	4.4	4.4	54.255	481	0	13.004	0	0	0	4.4	0	0	0	0	0	0	0	0	2913000	0	0	0	0
128	X6R6A3	Glycosylated lysosomal membrane protein	GLMP	X6R6A3;A0A087WV34;A0A087X0W3;Q8WWB7	tr|X6R6A3|X6R6A3_HUMAN Glycosylated lysosomal membrane protein OS=Homo sapiens OX=9606 GN=GLMP PE=1 SV=1;tr|A0A087WV34|A0A087WV34_HUMAN Glycosylated lysosomal membrane protein OS=Homo sapiens OX=9606 GN=GLMP PE=1 SV=1;tr|A0A087X0W3|A0A087X0W3_HUMAN Glycosy	4	1	1	0	0	0	1	0	0	0	0	0	0	0	0	1	0	0	0	0	0	5.5	5.5	20.02	183	0	1.5627	0	0	0	5.5	0	0	0	0	0	0	0	0	5399900	0	0	0	0
338	X6R8F3	Neutrophil gelatinase-associated lipocalin	LCN2	X6R8F3;B2ZDQ1;P80188	tr|X6R8F3|X6R8F3_HUMAN Neutrophil gelatinase-associated lipocalin OS=Homo sapiens OX=9606 GN=LCN2 PE=1 SV=1;tr|B2ZDQ1|B2ZDQ1_HUMAN Neutrophil gelatinase-associated lipocalin OS=Homo sapiens OX=9606 GN=NGAL PE=2 SV=1;sp|P80188|NGAL_HUMAN Neutrophil gelatina	3	1	1	0	1	1	0	0	0	0	1	0	0	1	1	0	0	0	0	1	0	5	5	22.788	200	0.005042	0.83815	0	5	5	0	0	0	0	5	0	0	15450000	9743500	0	0	0	0	3576600
654	X6RFN3	E3 ubiquitin-protein ligase RING2 (Fragment)	RNF2	X6RFN3;Q99496	tr|X6RFN3|X6RFN3_HUMAN E3 ubiquitin-protein ligase RING2 (Fragment) OS=Homo sapiens OX=9606 GN=RNF2 PE=1 SV=2;sp|Q99496|RING2_HUMAN E3 ubiquitin-protein ligase RING2 OS=Homo sapiens OX=9606 GN=RNF2 PE=1 SV=1	2	1	1	0	0	0	0	0	0	1	1	1	0	0	0	0	0	0	1	1	1	6.1	6.1	27.277	245	1	-2	0	0	0	0	0	0	6.1	6.1	6.1	0	0	0	0	0	0	32482000	46172000
68	X6RH99	Alpha-N-acetylgalactosaminide alpha-2,6-sialyltransferase 6 (Fragment)	ST6GALNAC6	X6RH99;A0A0S2Z653;A0A024R8C6;A0A0S2Z5G9;A0A2R8YFX0;Q969X2	tr|X6RH99|X6RH99_HUMAN Alpha-N-acetylgalactosaminide alpha-2,6-sialyltransferase 6 (Fragment) OS=Homo sapiens OX=9606 GN=ST6GALNAC6 PE=3 SV=1;tr|A0A0S2Z653|A0A0S2Z653_HUMAN ST6-N-acetylgalactosaminide alpha-26-sialyltransferase 6 isoform 2 OS=Homo sapiens	6	1	1	0	1	1	0	0	0	0	0	0	0	1	1	0	0	0	0	0	0	4	4	22.453	200	1	-2	0	4	4	0	0	0	0	0	0	0	14115000	10872000	0	0	0	0	0
632	X6RK76	Inositol 1,4,5-trisphosphate receptor-interacting protein (Fragment)	ITPRIP	X6RK76;Q8IWB1	tr|X6RK76|X6RK76_HUMAN Inositol 1,4,5-trisphosphate receptor-interacting protein (Fragment) OS=Homo sapiens OX=9606 GN=ITPRIP PE=1 SV=1;sp|Q8IWB1|IPRI_HUMAN Inositol 1,4,5-trisphosphate receptor-interacting protein OS=Homo sapiens OX=9606 GN=ITPRIP PE=1 SV	2	1	1	0	0	0	1	0	0	0	0	0	0	0	0	1	0	0	0	0	0	12.3	12.3	13.32	114	0	2.1966	0	0	0	12.3	0	0	0	0	0	0	0	0	1945200	0	0	0	0
91	X6RLJ0	Complement C1q subcomponent subunit A (Fragment)	C1QA	X6RLJ0;A0A024RAG6;P02745	tr|X6RLJ0|X6RLJ0_HUMAN Complement C1q subcomponent subunit A (Fragment) OS=Homo sapiens OX=9606 GN=C1QA PE=1 SV=7;tr|A0A024RAG6|A0A024RAG6_HUMAN Adiponectin C OS=Homo sapiens OX=9606 GN=C1QA PE=4 SV=1;sp|P02745|C1QA_HUMAN Complement C1q subcomponent subuni	3	2	2	2	1	2	2	2	2	2	2	2	2	1	2	2	2	2	2	2	2	13.2	13.2	23.351	220	0	323.31	13.2	12.7	13.2	13.2	13.2	13.2	13.2	13.2	13.2	347640000	191380000	349190000	2400800000	272390000	455710000	1364200000	449590000
[truncated: 21 more columns]
