# Supplementary material for: Identification of N-Glycoproteins of Knee Cartilage from Adult Osteoarthritis and Kashin-Beck Disease Based on Quantitative Glycoproteomics, Compared with Normal Control Cartilage
Source: Cells. 2022 Aug 12;11(16):2513. doi: 10.3390/cells11162513 (PMC9406367; doi:10.3390/cells11162513)
Supplement: Supplementary file 1 [file cells-11-02513-s001.zip › Tabel S5 N-GlycoPeptide-Identification-list.xlsx]

## Sheet: peptides
ID	Sequence	N-term cleavage window	C-term cleavage window	Amino acid before	First amino acid	Second amino acid	Second last amino acid	Last amino acid	Amino acid after	Length	Missed cleavages	Mass	Proteins	Leading razor protein	Start position	End position	Gene names	Protein names	Unique (Groups)	Unique (Proteins)	Charges	PEP	Score	Intensity CK1	Intensity CK2	Intensity CK3	Intensity KBD1	Intensity KBD2	Intensity KBD3	Intensity OA1	Intensity OA2	Intensity OA3	Protein group IDs	Mod. peptide IDs	Evidence IDs	MS/MS IDs	Best MS/MS	Deamidation 18O (N) site IDs	Oxidation (M) site IDs	MS/MS Count	LFQ intensity CK1	LFQ intensity CK2	LFQ intensity CK3	LFQ intensity KBD1	LFQ intensity KBD2	LFQ intensity KBD3	LFQ intensity OA1	LFQ intensity OA2	LFQ intensity OA3
2	AAENFTLLVK	PVEDDTHVPQPAFLKAAENFTLLVKNNIWY	PAFLKAAENFTLLVKNNIWYPKFNFSKRNI	K	A	A	V	K	N	10	0	1104.62	F6SFZ6;B7Z6W8;Q99571;Q0GM93;F5H1M6;B7Z4R5	F6SFZ6	181	190	P2RX4	P2X purinoceptor;P2X purinoceptor 4	yes	no	2	0.012878	92.838	0	0	0	5465300	0	0	0	0	0	428	2	2	2	2	765		1	0	0	0	2664000	0	0	0	0	0
4	AAGNTSESQSCAR	PLFQQVVSKMDNISRAAGNTSESQSCARSL	SRAAGNTSESQSCARSLLMADRMQIVVILS	R	A	A	A	R	S	13	0	1337.56	Q86WC4	Q86WC4	132	144	OSTM1	Osteopetrosis-associated transmembrane protein 1	yes	yes	2	1.0277e-16	202.56	0	0	0	11345000	0	0	0	0	0	627	4	4	4	4	1175		1	0	0	0	5529800	0	0	0	0	0
5	AAIPSALDTNSSK	EGLFVADVTDFEGWKAAIPSALDTNSSKST	WKAAIPSALDTNSSKSTSSFPCPAGHFNGF	K	A	A	S	K	S	13	0	1273.65	B4DVE1;A0A0S2Z3Y1;Q08380;B4DI70;B4DWA8;B3KP88;B4DDG4	B4DVE1	530	542	LGALS3BP	Galectin-3-binding protein	yes	no	2	0.0055964	93.258	0	0	0	81882000	0	32356000	0	0	0	184	5	5;6;7;8	5;6;7;8	5	353		4	0	0	0	39912000	0	27844000	0	0	0
6	AALAAFNAQNNGSNFQLEEISR	LLAPLNDTRVVHAAKAALAAFNAQNNGSNF	AQNNGSNFQLEEISRAQLVPLPPSTYVEFT	K	A	A	S	R	A	22	0	2364.15	C9JV77;B7Z8Q2;P02765;B7Z556	C9JV77	167	188	AHSG	Alpha-2-HS-glycoprotein;Alpha-2-HS-glycoprotein chain A;Alpha-2-HS-glycoprotein chain B	yes	no	2;3	0	360.82	0	46605000	0	233690000	0	87197000	746220000	580140000	1196200000	432	6	9;10;11;12;13;14;15;16;17;18	9;10;11;12;13;14;15;16;17;18;19;20;21	11	770;771		10	0	39372000	0	113910000	0	75039000	96405000	45339000	129820000
7	AANCCEEVK	QKLSKHKTPAQPQLKAANCCEEVKELKAQV	AQPQLKAANCCEEVKELKAQVANLSSLLSE	K	A	A	V	K	E	9	0	1079.44	O43827	O43827	42	50	ANGPTL7	Angiopoietin-related protein 7	yes	yes	2	0.0020309	135.83	0	0	0	35512000	0	9585200	7823500	108720000	0	509	7	19;20;21;22;23;24	22;23;24;25;26;27	26	894		6	0	0	0	17310000	0	8248800	1010700	8496300	0
10	AAPNNSADPR	LQRYDPFPAGDPEPRAAPNNSADPRVRRAA	DPEPRAAPNNSADPRVRRAAQATGPLQDNE	R	A	A	P	R	V	10	0	1011.47	Q8N6T2;P55107	Q8N6T2	88	97	GDF10	Growth/differentiation factor 10	yes	no	2	0.010833	91.867	0	0	0	0	0	0	0	0	0	565	10	29;30	32;33	33	1039		2	0	0	0	0	0	0	0	0	0
11	AAVHQINFTVGQTSEWIHGIQR	DLSLKDLTQECYDVKAAVHQINFTVGQTSE	FTVGQTSEWIHGIQRKTDEETLTLQKIVTD	K	A	A	Q	R	K	22	0	2491.27	Q6AZY7	Q6AZY7	218	239	SCARA3	Scavenger receptor class A member 3	yes	yes	3;4	2.6001e-57	211.68	0	0	0	0	0	0	74237000	381340000	0	605	11	31;32;33	34;35;36	36	1131		3	0	0	0	0	0	0	9590700	29803000	0
15	ACNCSGLGSK	CDRCARGYTGYPDCKACNCSGLGSKNEDPC	YPDCKACNCSGLGSKNEDPCFGPCICKENV	K	A	C	S	K	N	10	0	1052.44	A0A087WYF1;A0A087WX80;P24043	A0A087WYF1	468	477	LAMA2	Laminin subunit alpha-2	yes	no	2	0.0075024	103.55	0	0	0	3127500	0	0	15502000	12681000	0	133	16	63;64;65	86;87;88	87	256		3	0	0	0	1524400	0	0	2002700	991080	0
17	ACTEAEFACHSYNECVALEYR	GFQFRRLGTVPQFPRACTEAEFACHSYNEC	FACHSYNECVALEYRCDRRPDCRDMSDELN	R	A	C	Y	R	C	21	0	2579.05	A0A024RAB6;P98160;A0A3B3IT11	A0A024RAB6	153	173	HSPG2	Basement membrane-specific heparan sulfate proteoglycan core protein;Endorepellin;LG3 peptide	yes	no	2;3	7.6343e-106	260.53	121930000	9744300	113490000	234380000	0	82024000	664070000	57476000	0	89	18	69;70;71;72;73;74;75;76;77;78;79;80	93;94;95;96;97;98;99;100;101;102;103;104;105;106;107;108;109	98	178		17	121930000	8232100	121680000	114240000	0	70587000	85792000	4491900	0
19	ADGTVNQIEGEATPVNLTEPAK	LMENGKIKVLNQELRADGTVNQIEGEATPV	IEGEATPVNLTEPAKLEVKFSWCKYPLFPG	R	A	D	A	K	L	22	0	2253.11	B4DGC3;C9JX71;C9JF17;P05090	B4DGC3	83	104	APOD	Apolipoprotein D	yes	no	2;3	0	442.7	1582700000	1853800000	2869300000	308990000	0	0	2209700000	2914700000	2567900000	367	20	82;83;84;85;86;87;88;89;90;91;92;93;94;95;96;97;98	112;113;114;115;116;117;118;119;120;121;122;123;124;125;126;127;128;129;130;131;132;133;134;135;136;137;138;139;140;141;142;143;144;145;146;147;148;149;150;151;152;153;154	124	663		42	1582700000	1566100000	3076500000	150610000	0	0	285480000	227790000	278690000
20	ADGTVNQIEGEATPVNLTEPAKLEVK	LMENGKIKVLNQELRADGTVNQIEGEATPV	ATPVNLTEPAKLEVKFSWCKYPLFPGGFRD	R	A	D	V	K	F	26	1	2722.4	B4DGC3;C9JX71;C9JF17;P05090	B4DGC3	83	108	APOD	Apolipoprotein D	yes	no	3	2.762e-48	167.28	21175000	0	13835000	0	0	0	0	0	0	367	21	99;100	155;156	156	663		2	21175000	0	14834000	0	0	0	0	0	0
21	ADHHATNGVVHLIDK	YPNGIVTVNCARLLKADHHATNGVVHLIDK	ADHHATNGVVHLIDKVISTITNNIQQIIEI	K	A	D	D	K	V	15	0	1625.83	Q53GU8;A0A0S2Z4Q2;Q15582	Q53GU8	220	234	TGFBI	Transforming growth factor-beta-induced protein ig-h3	yes	no	3	2.8901e-14	152.94	0	0	0	49823000	0	0	0	0	0	186	22	101	157	157	359		1	0	0	0	24285000	0	0	0	0	0
24	ADTHDEILEGLNFNLTEIPEAQIHEGFQELLR	VSIATAFAMLSLGTKADTHDEILEGLNFNL	IPEAQIHEGFQELLRTLNQPDSQLQLTTGN	K	A	D	L	R	T	32	0	3690.82	A0A0G2JRN3;E9KL23;A0A384MDQ7;A0A024R6I7;P01009;G3V2B9;A0A0B4J278;G3V544	A0A0G2JRN3	94	125	SERPINA1	Alpha-1-antitrypsin;Short peptide from AAT	yes	no	3;4	3.1889e-47	160.48	0	29824000	136380000	26110000	0	0	58882000	0	0	51	25	107;108;109;110	163;164;165;166;167;168	164	83		6	0	25195000	146220000	12727000	0	0	7607000	0	0
25	AEFNITLIHPK	DARKSFPCFDEPAMKAEFNITLIHPKDLTA	PAMKAEFNITLIHPKDLTALSNMLPKGPST	K	A	E	P	K	D	11	0	1281.71	A0A024RC61;Q59E93;P15144	A0A024RC61	231	241	ANPEP	Aminopeptidase N	yes	no	2;3	2.1258e-13	175.49	0	0	0	302090000	168500000	137300000	275660000	1032400000	207770000	99	26	111;112;113;114;115;116;117;118;119;120;121	169;170;171;172;173;174;175;176;177;178;179;180;181	179	217		11	0	0	0	147250000	205370000	118160000	35613000	80683000	22549000
26	AENQTAPGEVPALSNLRPPSR	AGYSTSRAREPGASRAENQTAPGEVPALSN	PGEVPALSNLRPPSRVDGMVGDDPYNPYKY	R	A	E	S	R	V	21	0	2203.13	Q96PQ9;D0PNI2;P28300;B4DQF8	Q96PQ9	142	162	LOX	Protein-lysine 6-oxidase	yes	no	3	0.00046974	103.17	52318000	13793000	48325000	0	26042000	28360000	0	0	0	457	27	122;123;124;125;126	182;183;184;185;186;187;188;189;190	185	806		9	52318000	11653000	51814000	0	31740000	24406000	0	0	0
27	AENQVNVTCQVR	IRVPPTLEVTQQPVRAENQVNVTCQVRKFY	PVRAENQVNVTCQVRKFYPQRLQLTWLENG	R	A	E	V	R	K	12	0	1416.68	H3BQ21;B4DP97;D3DVW9;Q5TFQ8;P78324;H3BSK5	H3BQ21	102	113	SIRPB1;PTPNS1;SIRPA	Signal-regulatory protein beta-1 isoform 3;Tyrosine-protein phosphatase non-receptor type substrate 1	yes	no	2	4.842e-114	238.51	0	7897800	0	13535000	5962900	5472300	0	108090000	106030000	385	28	127;128;129;130;131;132;133	191;192;193;194;195;196;197	195	695		7	0	6672100	0	6597200	7267700	4709300	0	8447400	11507000
28	AEPPLNASASDQGEK	FTKPRPRPKDKNGTRAEPPLNASASDQGEK	AEPPLNASASDQGEKVIPPAGQTEDAEPIS	R	A	E	E	K	V	15	0	1512.71	B7Z766;B3KXH0;A0A384P5T6;Q9Y4L1;A0A087X054;B7Z2N4	B7Z766	775	789	HYOU1	Hypoxia up-regulated protein 1	yes	no	2	4.1209e-06	117.2	0	0	0	22196000	0	0	0	0	0	252	29	134;135	198;199	199	479		2	0	0	0	10819000	0	0	0	0	0
30	AFINGTGVETVVSADLPNAHGLAVDWVSR	QRVYWSDVRTQAIKRAFINGTGVETVVSAD	DLPNAHGLAVDWVSRNLFWTSYDTNKKQIN	R	A	F	S	R	N	29	0	2994.52	Q07954	Q07954	1642	1670	LRP1	Prolow-density lipoprotein receptor-related protein 1;Low-density lipoprotein receptor-related protein 1 85 kDa subunit;Low-density lipoprotein receptor-related protein 1 515 kDa subunit;Low-density lipoprotein receptor-related protein 1 intracellular domain	yes	yes	3	1.8342e-65	177.73	0	46568000	22261000	162710000	22314000	38890000	207830000	391560000	94596000	575	32	205;206;207;208;209;210;211;212;213;214	343;344;345;346;347;348;349;350;351;352;353	353	1056		11	0	39341000	23868000	79309000	27197000	33468000	26850000	30601000	10266000
31	AFNNSSILNRHKMIHTGEK	IHTGEKPYKCEECGKAFNNSSILNRHKMIH	SSILNRHKMIHTGEKLYKPESCNNACDNIA	K	A	F	E	K	L	19	2	2196.12	Q9P255;A6NK75	Q9P255	485	503	ZNF492;ZNF98	Zinc finger protein 492;Zinc finger protein 98	yes	no	2	2.7396e-14	138.63	2584300000	56166000	1627700000	1101500000	0	0	5698800000	5421100000	5324200000	287	33	215;216;217;218;219;220;221;222;223;224;225;226;227;228;229;230;231;232;233;234;235;236;237;238;239;240;241;242;243	354;355;356;357;358;359;360;361;362;363;364;365;366;367;368;369;370;371;372;373;374;375;376;377;378;379;380;381;382;383;384;385;386;387;388;389;390;391;392;393;394;395;396;397;398;399;400;401;402;403;404;405;406;407;408;409;410;411;412;413	371	537;538		60	2584300000	47449000	1745200000	536900000	0	0	736240000	423670000	577810000
32	AFNSTLPTMAQMEK	GRYSISRTEAADLCKAFNSTLPTMAQMEK_	KAFNSTLPTMAQMEK_______________	K	A	F	E	K	-	14	0	1567.74	C1PHC3;E9PKC6;Q86UZ1;H0YDX6;A0A1Z1VXF2;H0YD13;H0YDW7;H0YCV9;H0Y2P0;H0Y5E4;B4DN59;A8K309;A0A385KNS5;P16070	C1PHC3	32	45	CD44	CD44 antigen	yes	no	2	1.4954e-17	204	0	26661000	13088000	261820000	105430000	116980000	755830000	3000100000	709000000	220	34;35;36	244;245;246;247;248;249;250;251;252;253;254;255;256;257;258;259	414;415;416;417;418;419;420;421;422;423;424;425;426;427;428;429;430;431;432;433;434;435;436	426	416	40;41	23	0	22524000	14033000	127620000	128500000	100670000	97647000	234460000	76946000
35	AGAINATYK	RPEDSGKYTCRVSNRAGAINATYKVDVIQR	CRVSNRAGAINATYKVDVIQRTRSKPVLTG	R	A	G	Y	K	V	9	0	907.476	A0PJ49;Q6ZMD4;Q8N441	A0PJ49	38	46	FGFRL1	Fibroblast growth factor receptor-like 1	yes	no	2	0.0047529	114.5	8015700	10651000	11880000	4595400	5655300	0	0	0	0	264	39	267;268;269;270;271	447;448;449;450;451	449	502		5	8015700	8997800	12738000	2239900	6892800	0	0	0	0
37	AGHFQNTSSPSAR	KDEVGKGNNHCVPCKAGHFQNTSSPSARCQ	CKAGHFQNTSSPSARCQPHTRCENQGLVEA	K	A	G	A	R	C	13	0	1358.63	F5H627;F5H6F8;F5H2E7;B3KTD9;P36941	F5H627	65	77	LTBR	Tumor necrosis factor receptor superfamily member 3	yes	no	2;3	0.0024651	93.203	0	0	0	6871200	0	0	3065000	0	16488000	353	41	273;274;275	453;454;455	455	641		3	0	0	0	3349200	0	0	395970	0	1789400
39	AGNCSWEAHPGNR	______________________________	______________________________	M	A	G	N	R	N	13	0	1454.61	F5H5R4;Q8N2G2;B4DE51;A0A2I4R878;A0A024R5F0;Q96AM1	F5H5R4	2	14	MRGPRF	Mas-related G-protein coupled receptor member F	yes	no	2	2.1544e-191	308	0	0	0	160470000	35141000	20772000	311640000	822430000	292050000	41	43	279;280;281;282;283;284	459;460;461;462;463;464;465;466;467	466	69		9	0	0	0	78220000	42830000	17876000	40261000	64275000	31695000
40	AGPNGTLFVADAYK	TRDDEPVCGRPLGIRAGPNGTLFVADAYKG	RAGPNGTLFVADAYKGLFEVNPWKREVKLL	R	A	G	Y	K	G	14	0	1422.71	H0Y512;Q9HDC9	H0Y512	142	155	APMAP	Adipocyte plasma membrane-associated protein	yes	no	2	8.4417e-44	188.26	12787000	6670700	3371400	29157000	0	11619000	98439000	0	183870000	489	44	285;286;287;288;289;290;291;292	468;469;470;471;472;473;474;475	474	866		8	12787000	5635500	3614800	14212000	0	9998700	12717000	0	19955000
41	AGQPATAFSQQDLLDGAVLYSHNGSLSPR	HYHVTAGPRWGQLVRAGQPATAFSQQDLLD	DGAVLYSHNGSLSPRDTMAFSVEAGPVHTD	R	A	G	P	R	D	29	0	2999.47	Q6UVK1	Q6UVK1	1180	1208	CSPG4	Chondroitin sulfate proteoglycan 4	yes	yes	3	1.9352e-131	249.96	43334000	34130000	0	119510000	0	77208000	679100000	1469200000	410110000	615	45	293;294;295;296;297;298;299;300	476;477;478;479;480;481;482;483;484;485;486;487;488;489;490;491	487	1146		16	43334000	28833000	0	58252000	0	66443000	87733000	114820000	44507000
44	AIDYCSFGNHSCQHECVSTPGGPR	CQVGFVLQQDQRSCRAIDYCSFGNHSCQHE	HSCQHECVSTPGGPRCHCREGHDLQPDGRS	R	A	I	P	R	C	24	0	2735.13	B3KQB2;A2RRP8;O95460	B3KQB2	256	279	MATN4	Matrilin-4	yes	no	3;4	1.276e-41	179.36	0	0	0	97334000	69755000	132040000	489870000	4583300000	789980000	269	48	303;304;305;306;307;308;309	494;495;496;497;498;499;500;501;502;503;504;505;506;507;508;509	503	508		16	0	0	0	47443000	85017000	113630000	63287000	358190000	85734000
45	AIHIQAENGPHLLVEAEQAK	WADHLSDNYTLDHDRAIHIQAENGPHLLVE	AENGPHLLVEAEQAKVFSHRGGNVTLPCKF	R	A	I	A	K	V	20	0	2167.14	A0A024RAK9;P10915;D6RBS1;D6RG04;D6RBX9;D6RC59;D6RAK7	A0A024RAK9	29	48	HAPLN1	Hyaluronan and proteoglycan link protein 1	yes	no	2;3	3.0772e-07	92.939	0	0	0	0	0	0	23581000	0	0	92	49	310;311;312;313;314;315;316	510;511;512;513;514;515;516	511	191		6	0	0	0	0	0	0	3046500	0	0
46	AIHYALNCCGLAGGVEQFISDICPK	NKLKTKDEPQRETLKAIHYALNCCGLAGGV	LAGGVEQFISDICPKKDVLETFTVKSCPDA	K	A	I	P	K	K	25	0	2792.31	B4DPP0;A6NNI4;A0A2R8Y478;G8JLH6;P21926	B4DPP0	58	82	CD9	Tetraspanin;CD9 antigen	yes	no	3	1.0319e-65	184.95	0	0	22955000	55916000	49011000	45858000	0	0	0	233	50	317;318;319;320;321	517;518;519;520;521;522;523	523	427		7	0	0	24613000	27255000	59735000	39464000	0	0	0
47	AIIANLTCK	RIRSKFSNNAKYDPKAIIANLTCKKPDQHF	AKYDPKAIIANLTCKKPDQHFKPYLKQHLP	K	A	I	C	K	K	9	0	1002.55	E5RIA2;E7EUF1;Q13822	E5RIA2	46	54	ENPP2	Ectonucleotide pyrophosphatase/phosphodiesterase family member 2	yes	no	2	0.0038366	117.04	0	9219600	0	20016000	10646000	28969000	0	0	218280000	469	51	322;323;324;325;326;327	524;525;526;527;528;529	529	833		6	0	7788800	0	9756400	12975000	24930000	0	0	23689000
48	AINITVVESGYVR	TCNVTESVNDHQDEKAINITVVESGYVRLL	EKAINITVVESGYVRLLGEVGTLQFAELHR	K	A	I	V	R	L	13	0	1419.77	A8KAM8;P09619	A8KAM8	305	317	PDGFRB	Platelet-derived growth factor receptor beta	yes	no	2	2.1172e-06	133.89	0	0	0	24268000	0	0	0	0	0	313	52	328;329;330	530;531;532	530	581		3	0	0	0	11829000	0	0	0	0	0
49	AINQGNYGWQAGNHSAFWGMTLDEGIR	QCDQEPCLVDPDMIKAINQGNYGWQAGNHS	NHSAFWGMTLDEGIRYRLGTIRPSSSVMNM	K	A	I	I	R	Y	27	0	2992.37	F6SDV2;B4DVG5;Q9GZM7	F6SDV2	44	70	TINAGL1	Tubulointerstitial nephritis antigen-like	yes	no	3	0.013085	41.188	0	0	0	0	0	0	0	0	0	395	53	331	533	533	713		1	0	0	0	0	0	0	0	0	0
51	ALAGLVYNASGSEHCYDIYR	CDRLLSEAQRITGLRALAGLVYNASGSEHC	VYNASGSEHCYDIYRLYHSCADPTGCGTGP	R	A	L	Y	R	L	20	0	2258.04	Q9UHL4	Q9UHL4	308	327	DPP7	Dipeptidyl peptidase 2	yes	yes	2;3	1.1127e-90	249.41	29245000	28898000	10893000	37484000	8814000	13130000	241300000	238320000	299250000	668	55	334;335;336;337;338;339;340;341;342;343	537;538;539;540;541;542;543;544;545;546;547;548;549;550	549	1252		13	29245000	24413000	11679000	18271000	10743000	11299000	31174000	18625000	32477000
52	ALGFENATQALGR	CDNLWDLTDASVVCRALGFENATQALGRAA	CRALGFENATQALGRAAFGQGSGPIMLADC	R	A	L	G	R	A	13	0	1346.69	B4DVE1;A0A0S2Z3Y1;Q08380;K7ESM3;K7EKQ5;K7EP36;B4DI70;K7ES75;K7EN99;K7ERZ6;K7EJD3	B4DVE1	64	76	LGALS3BP	Galectin-3-binding protein	yes	no	2	7.9711e-78	253.71	0	0	0	136290000	45501000	112430000	44498000	250270000	123130000	184	56	344;345;346;347;348;349	551;552;553;554;555;556	551	354		6	0	0	0	66433000	55457000	96751000	5748700	19559000	13363000
56	ALLPFDNLHDDPCLLTNR	LGLLAVNQRFQDNGRALLPFDNLHDDPCLL	PFDNLHDDPCLLTNRSARIPCFLAGDTRSS	R	A	L	N	R	S	18	0	2123.05	P05164;P11678	P05164	375	392	MPO;EPX	Myeloperoxidase;Myeloperoxidase;89 kDa myeloperoxidase;84 kDa myeloperoxidase;Myeloperoxidase light chain;Myeloperoxidase heavy chain;Eosinophil peroxidase;Eosinophil peroxidase light chain;Eosinophil peroxidase heavy chain	yes	no	3	7.612e-11	138.55	12763000	6940700	0	0	0	0	0	270630000	771540000	531	60	360;361;362;363	568;569;570;571;572;573;574	572	947		7	12763000	5863600	0	0	0	0	0	21151000	83733000
57	ALMNGSESR	VTDWAWYKITDSEDKALMNGSESRFFVSSS	TDSEDKALMNGSESRFFVSSSQGRSE____	K	A	L	S	R	F	9	0	963.444	I3L192;A0A087X2B5;B4DY23;Q54A51;B4DNE1;P35613;R4GMX5;A0A087WUV8	I3L192	141	149	BSG;hEMMPRIN	Basigin	yes	no	2	0.00014853	164.72	62016000	0	90823000	305120000	278110000	243070000	1808900000	3622200000	3778800000	145	61;62	364;365;366;367;368;369;370;371;372;373;374	575;576;577;578;579;580;581;582;583;584;585;586;587	587	292	29	12	62016000	0	97381000	148720000	338970000	209180000	233690000	283080000	410100000
59	ALNNCSFCHEAGQLGPEIR	KLVLMQKNLQGLDPKALNNCSFCHEAGQLG	CSFCHEAGQLGPEIRKLQEELEGIQKLLLA	K	A	L	I	R	K	19	0	2171.98	Q6AZY7	Q6AZY7	112	130	SCARA3	Scavenger receptor class A member 3	yes	yes	3	5.8562e-61	175.21	0	0	0	0	22377000	16319000	0	0	0	605	64	376;377;378;379;380	589;590;591;592;593	592	1132		5	0	0	0	0	27274000	14044000	0	0	0
60	ALNTSQLK	EQEIEVKIVEAVDGKALNTSQLKALNIEML	VEAVDGKALNTSQLKALNIEMLPGYRDPYS	K	A	L	L	K	A	8	0	873.492	B4DF84;A0A3B3IT37;Q8IYK4;Q5SXQ3;B3KT71;B3KT92	B4DF84	380	387	COLGALT2;GLT25D2	Procollagen galactosyltransferase 2	yes	no	2	0.018901	100.19	0	8725900	0	7837000	0	0	0	0	0	260	65	381;382;383	594;595;596	595	497		3	0	7371700	0	3820000	0	0	0	0	0
61	ALPQPQNVTSLLGCTH	NLYCYSDVEKLNAAKALPQPQNVTSLLGCT	LPQPQNVTSLLGCTH_______________	K	A	L	T	H	-	16	0	1734.87	P02790	P02790	447	462	HPX	Hemopexin	yes	yes	2;3	5.8351e-61	212.82	206180000	393170000	213520000	638450000	177300000	300900000	3717700000	8888000000	5285300000	526	66	384;385;386;387;388;389;390;391;392;393;394	597;598;599;600;601;602;603;604;605;606;607;608;609;610;611;612;613;614	612	938		18	206180000	332150000	228940000	311200000	216100000	258950000	480300000	694610000	573590000
62	ALSPNSTISSAPK	ARIRPTAVTLEHVPKALSPNSTISSAPKDF	PKALSPNSTISSAPKDFAIFGFDEDLQQEG	K	A	L	P	K	D	13	0	1271.67	B0QY60;Q6NT72;B4DIU6;A8K129;A0A024R1P7;B4E2A6;Q9UH99	B0QY60	105	117	SUN2;UNC84B	SUN domain-containing protein 2	yes	no	2	0.0010496	115.18	0	12837000	0	44495000	0	0	0	0	0	22	67	395;396	615;616;617	617	25		3	0	10845000	0	21688000	0	0	0	0	0
65	ALVNFTR	SGDLGSGDFQMVYFRALVNFTRSIEYSPQL	DFQMVYFRALVNFTRSIEYSPQLEDAGSRE	R	A	L	T	R	S	7	0	819.46	A0A024RAB6;P98160;A0A3B3IT11	A0A024RAB6	41	47	HSPG2	Basement membrane-specific heparan sulfate proteoglycan core protein;Endorepellin;LG3 peptide	yes	no	1;2	0.0096131	139.92	155460000	50022000	0	99175000	214020000	575270000	0	1230400000	0	89	70	403;404;405;406;407;408;409;410	624;625;626;627;628;629;630;631	630	179		3	155460000	42259000	0	48341000	260840000	495060000	0	96158000	0
66	AMNASANITSDGVEVLGK	TLVKVVIDCKQVGEKAMNASANITSDGVEV	ASANITSDGVEVLGKMVRSRGPGGNSAPFQ	K	A	M	G	K	M	18	0	1775.87	Q05707;A0A0A0MQT7	Q05707	1382	1399	COL14A1	Collagen alpha-1(XIV) chain	yes	no	2	1.082e-109	266.35	0	20500000	4596200	739580000	0	0	802350000	5194900000	352530000	572	71;72;73;74	411;412;413;414;415;416;417;418;419;420;421;422;423;424;425;426;427;428;429;430;431;432;433;434	632;633;634;635;636;637;638;639;640;641;642;643;644;645;646;647;648;649;650;651;652;653;654;655;656;657;658;659;660;661;662;663	660	1050;1051	107	31	0	17318000	4928000	360490000	0	0	103660000	405990000	38259000
68	AMSSNETAAYK	DNNTWNNSHIALVGKAMSSNETAAYKIMRT	LVGKAMSSNETAAYKIMRTLDVDYVLVIFG	K	A	M	Y	K	I	11	0	1171.52	Q8TCJ2	Q8TCJ2	637	647	STT3B	Dolichyl-diphosphooligosaccharide--protein glycosyltransferase subunit STT3B	yes	yes	2	6.176e-05	126.07	0	18239000	0	88809000	0	0	211780000	798840000	289410000	641	76;77	440;441;442;443;444;445;446;447	671;672;673;674;675;676;677;678	675	1200	120	7	0	15409000	0	43288000	0	0	27360000	62431000	31409000
69	ANATIEVK	SGEYHCVYHFVSAPKANATIEVKAAPDITG	HFVSAPKANATIEVKAAPDITGHKRSENKN	K	A	N	V	K	A	8	0	844.465	Q9UFM8;Q9Y639;Q9Y499	Q9UFM8	191	198	DKFZp566H1924;NPTN	Neuroplastin	yes	no	2	0.013471	109.01	30963000	73703000	35293000	155330000	274360000	168880000	0	0	949560000	667	78	448;449;450;451;452;453;454;455	679;680;681;682;683;684;685;686;687	681	1248		9	30963000	62265000	37841000	75711000	334390000	145340000	0	0	103050000
70	ANDTSYIR	QFNNIASITDDTFCKANDTSYIRDRIEEIR	TDDTFCKANDTSYIRDRIEEIRLEGNPIVL	K	A	N	I	R	D	8	0	938.446	A8K0R3;B4DI63;P20774;Q7Z532	A8K0R3	257	264	OGN	Mimecan	yes	no	1;2	4.355e-13	189.14	10609000000	19893000000	13556000000	55635000000	38731000000	36107000000	149830000000	199190000000	157950000000	293	79	456;457;458;459;460;461;462;463;464;465;466;467;468;469;470;471;472;473;474;475;476;477;478;479	688;689;690;691;692;693;694;695;696;697;698;699;700;701;702;703;704;705;706;707;708;709;710;711;712;713;714;715;716;717;718;719;720;721;722;723;724;725;726;727;728;729;730;731;732;733;734;735;736;737;738	733	547		50	10609000000	16806000000	14535000000	27118000000	47205000000	31072000000	19357000000	15567000000	17142000000
71	ANDTSYIRDR	QFNNIASITDDTFCKANDTSYIRDRIEEIR	DTFCKANDTSYIRDRIEEIRLEGNPIVLGK	K	A	N	D	R	I	10	1	1209.57	A8K0R3;B4DI63;P20774;Q7Z532	A8K0R3	257	266	OGN	Mimecan	yes	no	2;3	8.7193e-66	261.03	0	0	0	74968000	0	61183000	1187900000	198830000	991030000	293	80	480;481;482;483;484;485;486;487;488	739;740;741;742;743;744;745;746;747;748;749;750;751	744	547		13	0	0	0	36542000	0	52652000	153460000	15539000	107550000
72	ANDTSYIRDRIEEIR	QFNNIASITDDTFCKANDTSYIRDRIEEIR	ANDTSYIRDRIEEIRLEGNPIVLGKHPNSF	K	A	N	I	R	L	15	2	1849.93	A8K0R3;B4DI63;P20774;Q7Z532	A8K0R3	257	271	OGN	Mimecan	yes	no	3	1.4435e-13	156	0	0	0	0	13294000	41816000	196960000	219950000	0	293	81	489;490;491;492;493	752;753;754;755;756;757	754	547		4	0	0	0	0	16202000	35986000	25445000	17190000	0
73	ANGTVQVVSPR	GEGYHSRQVTCKRTKANGTVQVVSPRACAP	KRTKANGTVQVVSPRACAPKDRPLGRKPCF	K	A	N	P	R	A	11	0	1126.61	P82987	P82987	1515	1525	ADAMTSL3	ADAMTS-like protein 3	yes	yes	2	8.0686e-81	204.5	6999800	0	0	0	0	0	0	67042000	93060000	567	82	494;495;496;497;498;499	758;759;760;761;762;763;764	761	1042		7	6999800	0	0	0	0	0	0	5239500	10099000
74	ANIQFGDNGTTISAVSNK	VEEVGPYTYRELRNKANIQFGDNGTTISAV	QFGDNGTTISAVSNKAYVFERDQSVGDPKI	K	A	N	N	K	A	18	0	1835.9	A0A1W2PQR6;A0A1W2PQB7;A0A1W2PS43;A0A024RDG6;A0A1W2PRS1;Q14108;A0A1W2PPX5;A0A1W2PPU6;A0A1W2PS70;A0A1W2PNX7;A0A1W2PSE4	A0A1W2PQR6	98	115	SCARB2	Lysosome membrane protein 2	yes	no	2;3	3.5462e-94	256.04	15962000	16131000	0	189220000	0	28183000	405050000	1175900000	383310000	102	83	500;501;502;503;504;505;506;507;508	765;766;767;768;769;770;771;772;773;774;775	768	224		10	15962000	13628000	0	92229000	0	24253000	52329000	91898000	41599000
75	ANLEIMTKR	SFEAQGALANIAVDKANLEIMTKRSNYTPI	NIAVDKANLEIMTKRSNYTPITNVPPEVTV	K	A	N	K	R	S	9	1	1074.59	B4E2U4;Q59GE3;B0UXD8;A0A1V0E3V4;A0A0G2JMH6;P01903;B4DLJ8;Q30118;B4DVL4;A0A0G2JH46;B4DW37	B4E2U4	33	41	HLA-DRA1;HLA-DRA	HLA class II histocompatibility antigen, DR alpha chain	yes	no	2	0.017143	91.626	11266000	0	14034000	0	0	0	39859000	0	71184000	172	84	509;510;511;512	776;777;778;779	777	338	33	4	11266000	0	15047000	0	0	0	5149500	0	7725300
76	ANLSSQALR	QELLAKRMKVDREVRANLSSQALRMSLDYG	VDREVRANLSSQALRMSLDYGFVTPLTSMS	R	A	N	L	R	M	9	0	958.52	B7Z539;B7Z8B6	B7Z539	587	595			yes	no	2	3.0104e-05	193.86	0	0	0	66870000	0	40996000	175830000	856730000	458700000	422	85	513;514;515;516;517	780;781;782;783;784;785;786;787	784	754		8	0	0	0	32594000	0	35280000	22716000	66955000	49781000
77	ANLTVVLLR	KNLTLRCQVEGGAPRANLTVVLLRGEKELK	EGGAPRANLTVVLLRGEKELKREPAVGEPA	R	A	N	L	R	G	9	0	997.628	B4DNT6;B4DQW5;Q5NKV8;A0A384MEK5;P05362;Q15462;K7EKL8	B4DNT6	54	62	ICAM1;P3.58	Intercellular adhesion molecule 1	yes	no	2	4.742e-28	178.83	18427000	12752000	6347600	18113000	13052000	23648000	0	241750000	0	246	86	518;519;520;521;522;523;524;525	788;789;790;791;792;793;794;795	794	455		8	18427000	10773000	6806000	8828700	15907000	20351000	0	18893000	0
79	ANQSWEDSNTDLVPAPAVR	RELRKRYEDLLTRLRANQSWEDSNTDLVPA	WEDSNTDLVPAPAVRILTPEVRLGSGGHLH	R	A	N	V	R	I	19	0	2068.98	A0A0A0MTT8;Q99988	A0A0A0MTT8	69	87	GDF15	Growth/differentiation factor 15	yes	no	2	1.143e-119	263.59	0	7561600	8859700	9476600	0	0	25319000	33604000	0	156	88	527;528;529;530;531;532	797;798;799;800;801;802	801	316		6	0	6388100	9499400	4619200	0	0	3271000	2626200	0
80	ANQTYTSVAR	QDLERHLRAHGYPLRANQTYTSVARHIHEY	GYPLRANQTYTSVARHIHEYLQRRLLAAAP	R	A	N	A	R	H	10	0	1109.55	A0A3B3ISX9;A0A087WWA5	A0A3B3ISX9	1016	1025	TNXB		yes	no	2	2.4135e-10	204.7	7365100	16744000	6823700	212310000	110230000	46771000	663820000	832010000	541950000	259	89	533;534;535;536;537;538;539;540;541	803;804;805;806;807;808;809;810;811;812;813;814	809	493		12	7365100	14146000	7316400	103490000	134350000	40249000	85759000	65023000	58815000
81	ANTSALAVPSPVSNSASAR	SIRHAHSQSAEAERRANTSALAVPSPVSNS	ALAVPSPVSNSASARHRTEALMDAQKEDFN	R	A	N	A	R	H	19	0	1798.92	Q8N9Q8;Q15483;A0A024R319;P55268	Q8N9Q8	114	132	LAMB2	Laminin subunit beta-2	yes	no	2	1.1475e-12	133.16	0	0	0	15927000	0	0	0	0	0	29	90	542;543;544	815;816;817	815	38		3	0	0	0	7763400	0	0	0	0	0
83	ANTTQPGIVEGGQVLK	PSASSRMFLLVGAPKANTTQPGIVEGGQVL	NTTQPGIVEGGQVLKCDWSSTRRCQPIEFD	K	A	N	L	K	C	16	0	1610.86	L7RXH0;A5YM53;P06756;B4DYQ7	L7RXH0	73	88	ITGAV	Integrin alpha-V;Integrin alpha-V heavy chain;Integrin alpha-V light chain	yes	no	2	2.1832e-14	156.69	27105000	49995000	18771000	154320000	56068000	37385000	419680000	755120000	273830000	285	92	546;547;548;549;550;551;552;553;554	819;820;821;822;823;824;825;826;827;828;829;830;831	823	530		13	27105000	42236000	20127000	75219000	68336000	32172000	54218000	59015000	29718000
84	ANVTSENNMPR	DVDSKASLGNKLLLKANVTSENNMPRTNKT	LLLKANVTSENNMPRTNKTEFQLELPVKYA	K	A	N	P	R	T	11	0	1231.56	B3KXM6;P11215	B3KXM6	305	315	ITGAM	Integrin alpha-M	yes	no	2	3.5446e-05	138.98	0	0	0	6119300	0	0	0	0	0	359	93	555	832	832	650		1	0	0	0	2982700	0	0	0	0	0
85	ANYNLPIMVTDSGKPPMTNITDLR	NNTHALVSLLQNLNKANYNLPIMVTDSGKP	TDSGKPPMTNITDLRVQVCSCRNSKVDCNA	K	A	N	L	R	V	24	0	2660.33	B7Z236;B7Z3H7;P55290;B7Z985;B7Z9B1	B7Z236	355	378	CDH13	Cadherin-13	yes	no	3	8.7515e-27	151.33	0	0	0	79210000	0	0	329870000	102800000	237350000	416	94;95	556;557;558;559;560;561	833;834;835;836;837;838;839;840;841;842;843;844	837	743	80	12	0	0	0	38609000	0	0	42616000	8033700	25759000
86	APGWANSSAGSGR	VSVICNQLGCPTAIKAPGWANSSAGSGRIW	IKAPGWANSSAGSGRIWMDHVSCRGNESAL	K	A	P	G	R	I	13	0	1216.56	F5GZZ9;C9JHR8;Q86VB7;D3DUU0;D3DUU2	F5GZZ9	88	100	CD163	Scavenger receptor cysteine-rich type 1 protein M130;Soluble CD163	yes	no	2	0.0053089	94.82	0	0	0	21286000	0	0	0	84849000	0	446	96	562;563	845;846	845	788		2	0	0	0	10376000	0	0	0	6631100	0
87	APLGGVILVHLIIPGLNETTVK	IQNVTHKDSAKSPEKAPLGGVILVHLIIPG	LVHLIIPGLNETTVKLPASLMFEISDALKT	K	A	P	V	K	L	22	0	2253.35	A0A1S5UZ16;D3YTG3;Q7Z7G0;Q9H717;Q5JPC9;H7C4X4	A0A1S5UZ16	272	293	ABI3BP;DKFZp667H216	Target of Nesh-SH3	yes	no	3	5.3137e-13	106.03	0	0	0	0	0	18667000	0	0	0	214	97	564;565;566	847;848;849;850	848	398		4	0	0	0	0	0	16065000	0	0	0
89	APQLNHSNSDVVSINCNIR	STEYRPTPVEEDLRRAPQLNHSNSDVVSIN	NHSNSDVVSINCNIRLVPNQEINFHLLGNL	R	A	P	I	R	L	19	0	2137.03	A8K8T0;Q9UKX5	A8K8T0	1055	1073	ITGA11	Integrin alpha-11	yes	no	3	3.3699e-19	148.97	0	0	0	11399000	0	0	0	0	0	307	99	568	852	852	568		1	0	0	0	5556200	0	0	0	0	0
90	APSTEYNQSHIK	LTGGLEPAKINITAKAPSTEYNQSHIKALL	TAKAPSTEYNQSHIKALLPEDSGTHQVLRI	K	A	P	I	K	A	12	0	1373.66	Q7Z7M9;A5PL16	Q7Z7M9	400	411	GALNT5	Polypeptide N-acetylgalactosaminyltransferase 5	yes	no	2;3	6.9916e-06	150.1	0	0	0	3984900	7204700	0	0	0	0	625	100	569;570;571	853;854;855	853	1172		3	0	0	0	1942300	8781200	0	0	0	0
91	AQHNDSEQTQSPQQPGSR	GKKKGSQGAIPPPDKAQHNDSEQTQSPQQP	NDSEQTQSPQQPGSRNRGRGQGRGTAMPGE	K	A	Q	S	R	N	18	0	1993.88	A6XAA7;O60565	A6XAA7	39	56	GREM1	Gremlin;Gremlin-1	yes	no	2;3	0	363.37	0	274020000	281760000	52612000	0	0	960210000	1046800000	1141400000	290	101	572;573;574;575;576;577;578;579;580	856;857;858;859;860;861;862;863;864;865;866;867;868;869;870;871;872	861	543		17	0	231490000	302110000	25644000	0	0	124050000	81810000	123870000
92	AQLLQGLGFNLTER	MALAMLSLGTCGHTRAQLLQGLGFNLTERS	RAQLLQGLGFNLTERSETEIHQGFQHLHQL	R	A	Q	E	R	S	14	0	1558.85	G3V4V7;G3V350;B2R9F2;A0A2Z4LCH4;P08185	G3V4V7	87	100	SERPINA6	Corticosteroid-binding globulin	yes	no	2	6.2403e-24	214.26	0	20620000	17714000	31157000	0	0	0	733180000	361390000	240	102	581;582;583;584;585	873;874;875;876;877;878;879;880	880	438		8	0	17420000	18993000	15187000	0	0	0	57300000	39220000
93	AQMDGFSAGEAQAQANGSISVVTIILDK	FRVPGVCADSRANIRAQMDGFSAGEAQAQA	QANGSISVVTIILDKLEKPYLVKHPESRVR	R	A	Q	D	K	L	28	0	2820.4	K7EPJ4;B2RAJ0;Q8IUL8	K7EPJ4	267	294	CILP2	Cartilage intermediate layer protein 2;Cartilage intermediate layer protein 2 C1;Cartilage intermediate layer protein 2 C2	yes	no	3	4.1913e-06	100.68	0	9383500	9670200	0	0	0	0	0	0	329	103	586;587	881;882;883	881	603		3	0	7927300	10368000	0	0	0	0	0	0
94	AQPGTMSNGTETR	VLLEAALTDLRVQARAQPGTMSNGTETRGT	ARAQPGTMSNGTETRGTGLTAVAVQEGNSD	R	A	Q	T	R	G	13	0	1348.6	A0A140VJW3;Q9UGT4	A0A140VJW3	487	499	SUSD2	Sushi domain-containing protein 2	yes	no	2	0.0053463	94.616	0	0	0	26111000	8508000	12484000	0	0	0	198	104;105	588;589;590;591	884;885;886;887	885	374	36	4	0	0	0	12727000	10370000	10743000	0	0	0
95	AQVANLSSLLSELNK	QLKAANCCEEVKELKAQVANLSSLLSELNK	AQVANLSSLLSELNKKQERDWVSVVMQVME	K	A	Q	N	K	K	15	0	1585.87	O43827	O43827	54	68	ANGPTL7	Angiopoietin-related protein 7	yes	yes	2	1.9908e-71	244.47	0	0	0	427120000	51589000	0	114770000	1408800000	245310000	509	106	592;593;594;595;596;597;598	888;889;890;891;892;893;894;895	894	895		8	0	0	0	208190000	62877000	0	14827000	110100000	26623000
96	ASLQFLQNYTALASAVDAMDFINDATDVNDALGYVTR	AVVQYSGTGQQRPERASLQFLQNYTALASA	NDATDVNDALGYVTRFYREASSGAAKKRLL	R	A	S	T	R	F	37	0	3992.91	A0A087X0S5;A0A384P5H7;P12109;Q8TBN2	A0A087X0S5	887	923	COL6A1	Collagen alpha-1(VI) chain	yes	no	3	6.0112e-20	115.2	0	0	0	0	0	0	0	39497000	23402000	141	107;108	599;600;601;602;603;604;605;606;607	896;897;898;899;900;901;902;903;904;905;906;907;908;909;910;911;912;913;914;915;916	898	272;273		21	0	0	0	0	0	0	0	3086800	2539800
99	ASTEQAPELENLTVTEVGWDGLR	TAEKGRHKSKPARVKASTEQAPELENLTVT	LENLTVTEVGWDGLRLNWTAADQAYEHFII	K	A	S	L	R	L	23	0	2514.22	P24821;E9PC84;J3QSU6;A0A024R884;Q4LE33;A7MBN2	P24821	1069	1091	TNC;TNC variant protein	Tenascin	yes	no	2;3	6.6945e-191	291.06	0	0	0	403600000	0	0	264320000	988940000	0	553	111	617;618;619;620;621	926;927;928;929;930;931	930	997		6	0	0	0	196720000	0	0	34148000	77288000	0
101	ATDGDLGDNGTVR	VVENAPTGTELLMLRATDGDLGDNGTVRFS	LRATDGDLGDNGTVRFSLQEAETDRRSFRL	R	A	T	V	R	F	13	0	1289.58	Q6V0I7	Q6V0I7	607	619	FAT4	Protocadherin Fat 4	yes	yes	2	4.7192e-23	152.54	0	0	0	0	0	0	0	0	0	618	114	626	937	937	1155		1	0	0	0	0	0	0	0	0	0
103	ATINCRSSQRLFFGSNSK	MTQSPDSLGVSLGERATINCRSSQRLFFGS	NCRSSQRLFFGSNSKNYLAWYQQKPGQSPK	R	A	T	S	K	N	18	2	2072.02	Q9NP29	Q9NP29	39	56			yes	yes	3	0.022641	67.605	0	0	0	0	0	0	276070000	0	385000000	661	116	628;629	939;940;941	939	1227		3	0	0	0	0	0	0	35666000	0	41783000
105	ATPEAANASELAALR	KFTGAVCWSGPASTRATPEAANASELAALR	ATPEAANASELAALRMRVGRHEELLRELQR	R	A	T	L	R	M	15	0	1483.76	K7EKF6;A0A024R7A9;Q8NI99	K7EKF6	52	66	ANGPTL6	Angiopoietin-related protein 6	yes	no	2	0.0014018	107.97	0	11116000	7941900	0	0	0	30156000	0	0	57	118	631;632;633	943;944;945;946;947	944	96		5	0	9390800	8515300	0	0	0	3895900	0	0
109	AVLVNNITTGER	NFQLESVNKLYQDEKAVLVNNITTGERLIR	DEKAVLVNNITTGERLIRVLQ_________	K	A	V	E	R	L	12	0	1285.7	C9JYM4;B3KNK9;Q8NBJ4	C9JYM4	104	115	GOLM1;GOLPH2	Golgi membrane protein 1	yes	no	2	3.5311e-46	234.81	42327000	44191000	20257000	66126000	0	45178000	359610000	1108000000	340470000	341	122	638;639;640;641;642;643;644;645	952;953;954;955;956;957;958;959;960;961;962;963;964;965;966;967;968	966	623		17	42327000	37333000	21720000	32232000	0	38879000	46458000	86592000	36950000
111	AVNITSENLIDDVVSLIR	AEFNKDDCVKRGEGRAVNITSENLIDDVVS	ITSENLIDDVVSLIRGGTRKYAFELKEKLL	R	A	V	I	R	G	18	0	1970.07	A0A024R035;P02748	A0A024R035	413	430	C9	Complement component C9;Complement component C9a;Complement component C9b	yes	no	2	1.0927e-18	139.64	0	0	0	0	0	0	0	0	0	17	124	647;648	970;971	971	20		2	0	0	0	0	0	0	0	0	0
112	AWGTPCEMCPAVNTSEYK	GVGVSKASCCCSLGKAWGTPCEMCPAVNTS	TPCEMCPAVNTSEYKILCPGGEGFRPNPIT	K	A	W	Y	K	I	18	0	2099.88	A0A384MDM4;P35555;B4E3I6;Q59HB9;H0YND0	A0A384MDM4	1569	1586	FBN1	Fibrillin-1	yes	no	2;3	8.8439e-68	241.56	13499000	28731000	29485000	2321100000	0	97009000	1867100000	645700000	505440000	242	125;126	649;650;651;652;653;654;655;656;657;658;659;660;661;662	972;973;974;975;976;977;978;979;980;981;982;983;984;985;986;987;988;989;990;991;992;993;994	993	441	46	22	13499000	24272000	31614000	1131400000	0	83483000	241210000	50463000	54853000
113	AYLLPAPPAPGNASESEEDR	GRGLCVNASAVSRLRAYLLPAPPAPGNASE	APPAPGNASESEEDRSAGSVESPSVSSTHR	R	A	Y	D	R	S	20	0	2082.99	B3KWK7;B3KTQ0;B4DP07;A6XNC9;A6XND1;B3KVF9;A6XND0;B4DN53;B3KRZ1;P17936	B3KWK7	28	47	IGFBP3	Insulin-like growth factor-binding protein 3	yes	no	2	2.6352e-14	137.8	0	0	0	0	0	0	0	46721000	0	291	127	663	995;996	996	544		2	0	0	0	0	0	0	0	3651400	0
114	AYLLPNTSVIIK	QTREEKRINLTIGSRAYLLPNTSVIIKCPV	GSRAYLLPNTSVIIKCPVRRFQKSLIQWEK	R	A	Y	I	K	C	12	0	1330.79	P82987	P82987	922	933	ADAMTSL3	ADAMTS-like protein 3	yes	yes	2	0.0054694	98.044	68415000	137630000	77815000	20009000	0	0	383410000	393310000	520130000	567	128	664;665;666;667;668;669;670	997;998;999;1000;1001;1002;1003	998	1043		7	68415000	116270000	83433000	9752800	0	0	49533000	30738000	56448000
115	AYQNTALGR	QTVYYAKAFSKDLPRAYQNTALGRTILGPT	SKDLPRAYQNTALGRTILGPTENIKSISRK	R	A	Y	G	R	T	9	0	992.504	F8WAZ6	F8WAZ6	153	161	PMPCB		yes	yes	2	0.0045297	114.78	301320000	540130000	360620000	125860000	159730000	159160000	743760000	739370000	851200000	482	129	671;672;673;674;675;676;677;678;679	1004;1005;1006;1007;1008;1009;1010;1011;1012;1013;1014;1015;1016;1017;1018;1019	1008	851		16	301320000	456310000	386660000	61347000	194680000	136970000	96087000	57783000	92377000
117	CATPHGDNASLEATFVK	LHCATGISLANEQDRCATPHGDNASLEATF	TPHGDNASLEATFVKRCCHCCLLGRAAQAQ	R	C	A	V	K	R	17	0	1816.84	P23142;B4DUV1;B1AHL2;B1AHM6;B1AHM7;B1AHN3;B1AHM8;B1AHM9	P23142	91	107	FBLN1	Fibulin-1	yes	no	2;3	2.0692e-109	265.12	144240000	627530000	24464000	1035600000	80593000	506410000	15872000000	10711000000	11501000000	551	132	682;683;684;685;686;687;688;689;690;691;692;693;694;695;696;697;698;699;700;701	1023;1024;1025;1026;1027;1028;1029;1030;1031;1032;1033;1034;1035;1036;1037;1038;1039;1040;1041;1042;1043;1044;1045;1046;1047;1048;1049;1050;1051;1052;1053;1054;1055;1056	1038	993		33	144240000	530140000	26231000	504780000	98227000	435800000	2050500000	837090000	1248200000
119	CCGAANYTDWEK	NHTASILDRMQADFKCCGAANYTDWEKIPS	DFKCCGAANYTDWEKIPSMSKNRVPDSCCI	K	C	C	E	K	I	12	0	1473.57	F8VV56;F8W022;F8VWK8;A0A024RB05;P08962;W6A4U0	F8VV56	52	63	CD63	Tetraspanin;CD63 antigen	yes	no	2	6.394e-72	252.82	137440000	365010000	232860000	434480000	37180000	72652000	3054900000	3680800000	3103300000	96	134	703;704;705;706;707;708;709;710;711;712	1058;1059;1060;1061;1062;1063;1064;1065;1066;1067;1068;1069;1070;1071;1072;1073;1074;1075;1076;1077;1078;1079	1077	206		22	137440000	308360000	249680000	211780000	45315000	62522000	394660000	287660000	336790000
124	CDMDGQNR	KVFFTDYGQIPKVERCDMDGQNRTKLVDSK	QIPKVERCDMDGQNRTKLVDSKIVFPHGIT	R	C	D	N	R	T	8	0	994.36	Q07954;Q6PJ72	Q07954	351	358	LRP1	Prolow-density lipoprotein receptor-related protein 1;Low-density lipoprotein receptor-related protein 1 85 kDa subunit;Low-density lipoprotein receptor-related protein 1 515 kDa subunit;Low-density lipoprotein receptor-related protein 1 intracellular domain	yes	no	2	0.0040612	173.59	0	0	0	20494000	0	0	0	0	0	575	139	718	1085	1085	1057		1	0	0	0	9989200	0	0	0	0	0
125	CDQCEENYFYNR	DDGRCECREGFVGNRCDQCEENYFYNRSWP	GNRCDQCEENYFYNRSWPGCQECPACYRLV	R	C	D	N	R	S	12	0	1696.62	A0A024R972;P11047	A0A024R972	976	987	LAMC1	Laminin subunit gamma-1	yes	no	2	2.4272e-138	296.78	0	0	0	21357000	0	0	149780000	299770000	0	81	140	719;720;721;722	1086;1087;1088;1089;1090	1087	159		5	0	0	0	10410000	0	0	19351000	23428000	0
127	CECHFLNGTER	______________________________	EQAKCECHFLNGTERVWNLIRYIYNQEEYA	K	C	E	E	R	V	11	0	1421.58	A0A180H6N8;A0A2U7NIC9;A0A2H4FZZ4;O19738;D1MYB6;A0A2U7NIB5;A0A2U7NN60;A0A2U7NN54;A0A2U7NN48;A0A2U7NID4;A0A2U7MWP7;Q9GIJ6;A0A2H4FZY3;A0A2U7MZR8;A0A2U7MWP1;A0A2H4FZY4;A0A2H4G0I9;A0A2U7MWP0;A0A2H4G0I2;A0A2H4G0H9;O19743;Q9GJ49;A0A1X9I5B8;A0A2U7N3J3;A0A2U7N3I7;Q9MYE4;A0A2U7N9V4;A0A2U7N9U9;A0A2U7N9U1;A0A2U7N6W5;A0A2U7N6V6;A0A2U7N3K0;A0A2U7MZU1;Q9NQ54;A0A2H4G2W1;A0A2U7MZT2;A0A2U7MZS7;A0A2H4FZX0;A0A2U7NH0…	A0A180H6N8	8	18	HLA-DRB1;HLA-DRB4;DRB4;HLA-DRB4* variant allele;HLA-DRB2;HLA-DRB	HLA class II histocompatibility antigen, DR beta 4 chain	yes	no	3	0.0023701	92.925	0	0	0	7154800	0	0	0	0	0	2	142	724	1092	1092	2		1	0	0	0	3487500	0	0	0	0	0
131	CGALDVVFVIDSSESIGYTNFTLEK	TYVRETCGCCDCEKRCGALDVVFVIDSSES	DSSESIGYTNFTLEKNFVINVVNRLGAIAK	R	C	G	E	K	N	25	0	2763.33	A0A384MDP3;P12110;Q9BUM6;H7C0M5	A0A384MDP3	611	635	COL6A2	Collagen alpha-2(VI) chain	yes	no	2;3	2.6584e-69	207.39	0	6906300	0	4409100	0	0	37377000	27464000	31522000	243	147	761;762;763;764;765;766;767;768;769;770;771;772;773;774;775;776;777;778;779;780;781;782;783;784;785;786;787	1144;1145;1146;1147;1148;1149;1150;1151;1152;1153;1154;1155;1156;1157;1158;1159;1160;1161;1162;1163;1164;1165;1166;1167;1168;1169;1170;1171;1172;1173;1174;1175;1176;1177;1178;1179;1180	1167	449		36	0	5834500	0	2149100	0	0	4828800	2146300	3421000
132	CGLVPVLAENYNK	DAMSLDGGFVYIAGKCGLVPVLAENYNKSD	GKCGLVPVLAENYNKSDNCEDTPEAGYFAV	K	C	G	N	K	S	13	0	1475.74	B4DHZ6;B4DI57;B4E1B2;Q53H26;Q06AH7;P02787;A0A0K0K1H8	B4DHZ6	147	159	TF	Serotransferrin	yes	no	2	1.9997e-09	180.67	36836000	180110000	58861000	357530000	54524000	170970000	1439400000	3755700000	2419600000	369	148	788;789;790;791;792;793;794;795;796	1181;1182;1183;1184;1185;1186;1187;1188;1189;1190;1191	1183	668;669		11	36836000	152160000	63111000	174270000	66454000	147140000	185960000	293510000	262590000
133	CGNMSEAFR	MEVRWCATSDPEQHKCGNMSEAFREAGIQP	DPEQHKCGNMSEAFREAGIQPSLLCVRGTS	K	C	G	F	R	E	9	0	1070.43	C9JVN1;Q53XS6;P08582	C9JVN1	36	44	MFI2	Melanotransferrin	yes	no	2	0.02284	91.853	12070000	0	0	7398100	14389000	13882000	69761000	268710000	0	450	149	797;798;799;800;801;802	1192;1193;1194;1195;1196;1197;1198	1198	794	86	5	12070000	0	0	3606100	17538000	11946000	9012500	21001000	0
135	CGPLNVTLAAEACR	FVKKVFEKYHCKNRRCGPLNVTLAAEACRR	RCGPLNVTLAAEACRRKEHMALKAVRIRQL	R	C	G	C	R	R	14	0	1530.73	Q7LGC8	Q7LGC8	252	265	CHST3	Carbohydrate sulfotransferase 3	yes	yes	2	7.0857e-33	169.65	15512000	14864000	0	4982300	0	0	0	43749000	0	623	151	823;824;825;826;827;828	1244;1245;1246;1247;1248;1249	1247	1170		6	15512000	12557000	0	2428500	0	0	0	3419100	0
136	CHAGYIGDNCNCSTDISTCR	VLCSGHGECHCGECKCHAGYIGDNCNCSTD	IGDNCNCSTDISTCRGRDGQICSERGHCLC	K	C	H	C	R	G	20	0	2359.9	H7C5U2;D3DNA1;L7RT22;P18084;V9GZ57	H7C5U2	266	285	ITGB5	Integrin beta;Integrin beta-5	yes	no	3	3.1594e-15	141.22	0	0	0	11239000	0	0	0	0	0	459	152	829	1250	1250	809		1	0	0	0	5478100	0	0	0	0	0
137	CHEGNGTFECGACR	CECECQSEGIPESPKCHEGNGTFECGACRC	KCHEGNGTFECGACRCNEGRVGRHCECSTD	K	C	H	C	R	C	14	0	1653.61	P05556	P05556	477	490	ITGB1	Integrin beta-1	yes	yes	3	4.3653e-17	147.26	0	0	0	31630000	6978500	9605200	0	0	0	534	153	830;831;832;833;834;835	1251;1252;1253;1254;1255;1256	1254	954		5	0	0	0	15417000	8505400	8265900	0	0	0
138	CHFFNGTER	______________________________	______________________________	-	C	H	E	R	V	9	0	1166.49	Q29834;A0A288R112;A0A288QFE1;R9WVY2;Q9TQ60;Q95IE2;Q7YQ35;A0A0K0KRE1;A0A1X9I4V1;D6CJD7;C8C9V9;A0A2H4G4C7;S0F159;A0A0K0KRF2;A0A2H4G493;A0A2H4FZS7;A0A2H4FZR6;A0A2H4FZR4;A0A288R1P4;A0A288QRZ9;C0MP10;A0A288QFF2;S0F0N0;S0F2D3;A0A141AZJ2;D6PZZ4;D6PZZ0;S0F2K5;G9HRQ2;D1GZJ1;A0A0K0KRE7;F8SY56;F4NBL4;E1V2J5;A0A0K0KRE8;A0A0K0KRE4;S0F3I7;A0A0K0KRQ1;A0A0K0KRE3;A0A0K0KRE2;Q45FY1;U6EFX2;A0A0A8R917;A0A0K0KRD8;S5U…	Q29834	1	9	HLA-DRB1*1605;HLA-DRB1;HLA-DR4/Dw13;DRB1	HLA class II histocompatibility antigen, DRB1-7 beta chain	yes	no	2	0.017907	96.253	0	0	0	0	0	19319000	0	0	0	157	154	836	1257	1257	317		1	0	0	0	0	0	16626000	0	0	0
139	CICNSGYEVDSTGK	ICPNGICENLRGTYKCICNSGYEVDSTGKN	KCICNSGYEVDSTGKNCVDINECVLNSLLC	K	C	I	G	K	N	14	0	1588.65	A0A384MDM4;P35555;Q75N88	A0A384MDM4	748	761	FBN1	Fibrillin-1	yes	no	2	0.011459	77.64	0	0	0	0	0	0	0	0	0	242	155	837	1258	1258	442		1	0	0	0	0	0	0	0	0	0
140	CINGTCYCEEGFTGEDCGKPTCPHACHTQGR	CSELICPNDCFDRGRCINGTCYCEEGFTGE	CGKPTCPHACHTQGRCEEGQCVCDEGFAGV	R	C	I	G	R	C	31	0	3658.42	P24821;E9PC84;J3QSU6;A0A024R884;Q4LE33;F5H7V9;D3YHM4;B4E1W8	P24821	325	355	TNC;TNC variant protein	Tenascin	yes	no	4;5	7.9554e-68	185.02	0	0	0	37009000	0	0	0	2809200000	0	553	156	838;839;840	1259;1260;1261;1262	1260	998		3	0	0	0	18039000	0	0	0	219540000	0
141	CIQANYSLMENGK	WYEIEKIPTTFENGRCIQANYSLMENGKIK	GRCIQANYSLMENGKIKVLNQELRADGTVN	R	C	I	G	K	I	13	0	1526.69	B4DGC3;C9JX71;C9JF17;P05090	B4DGC3	61	73	APOD	Apolipoprotein D	yes	no	2	7.7251e-93	265.77	126800000	117190000	0	0	7135400	14114000	102630000	86316000	0	367	157;158	841;842;843;844;845;846;847;848	1263;1264;1265;1266;1267;1268;1269;1270;1271;1272;1273;1274	1265	664	69	12	126800000	99004000	0	0	8696700	12146000	13259000	6745800	0
142	CIQPLHDNTTR	SQTCGRTGMQVRSVRCIQPLHDNTTRSVHA	RSVRCIQPLHDNTTRSVHAKHCNDARPESR	R	C	I	T	R	S	11	0	1353.65	A0A1B0GTY3;O95450	A0A1B0GTY3	942	952	ADAMTS2	A disintegrin and metalloproteinase with thrombospondin motifs 2	yes	no	3	0.014346	70.488	0	0	0	4096900	0	0	0	0	0	209	159	849;850	1275;1276	1276	390		2	0	0	0	1996900	0	0	0	0	0
144	CNASSQFLCSSGR	DEAPKNPHCTSQEHKCNASSQFLCSSGRCV	HKCNASSQFLCSSGRCVAEALLCNGQDDCG	K	C	N	G	R	C	13	0	1472.61	Q07954;Q59FG2	Q07954	2904	2916	LRP1	Prolow-density lipoprotein receptor-related protein 1;Low-density lipoprotein receptor-related protein 1 85 kDa subunit;Low-density lipoprotein receptor-related protein 1 515 kDa subunit;Low-density lipoprotein receptor-related protein 1 intracellular domain	yes	no	2	4.9329e-298	350.95	0	0	0	78029000	0	0	0	0	0	575	161	853;854	1279;1280	1279	1058		2	0	0	0	38034000	0	0	0	0	0
145	CNDTIPEDFQEFQTQNFDR	CFSQENIIWSNLKYRCNDTIPEDFQEFQTQ	IPEDFQEFQTQNFDRFDN____________	R	C	N	D	R	F	19	0	2403.01	P35443;E7ES19	P35443	940	958	THBS4	Thrombospondin-4	yes	no	2;3	2.7897e-120	269.14	141160000	273120000	137180000	228530000	0	0	961510000	1958500000	2136300000	470	162	855;856;857;858;859;860;861;862;863;864;865;866;867;868;869;870	1281;1282;1283;1284;1285;1286;1287;1288;1289;1290;1291;1292;1293;1294;1295;1296;1297;1298;1299;1300;1301;1302;1303;1304;1305;1306;1307;1308;1309;1310	1299	834		29	141160000	230740000	147080000	111390000	0	0	124220000	153060000	231840000
148	CNDTVPEDFEPFR	CFSQENIIWSNLQYRCNDTVPEDFEPFRRQ	YRCNDTVPEDFEPFRRQLLQGRV_______	R	C	N	F	R	R	13	0	1624.68	B3KQE1;F5H4Z8;Q53FK6;Q2HIZ0;P49746;B4DQQ9;Q2HIZ1	B3KQE1	742	754	THBS3	Thrombospondin-3	yes	no	2	7.1645e-09	170.02	0	7052400	0	93190000	0	0	723560000	1557300000	571690000	345	165	893;894;895;896;897;898	1365;1366;1367;1368;1369;1370;1371;1372	1372	631		7	0	5957900	0	45424000	0	0	93478000	121710000	62043000
149	CNGSGTYVCGLCECSPGYLGTR	CTCGCSVGLEPNSARCNGSGTYVCGLCECS	VCGLCECSPGYLGTRCECQDGENQSVYQNL	R	C	N	T	R	C	22	0	2467	H7C5U2;D3DNA1;L7RT22;P18084;V9GZ57	H7C5U2	166	187	ITGB5	Integrin beta;Integrin beta-5	yes	no	2	6.0619e-57	211.57	0	0	0	0	0	0	0	61262000	0	459	166	899	1373;1374;1375	1374	810		3	0	0	0	0	0	0	0	4787800	0
150	CNMINGTDGDSFHPLITK	EWNGKTSLDWWITDKCNMINGTDGDSFHPL	INGTDGDSFHPLITKDEVLYVFPSDFCRSV	K	C	N	T	K	D	18	0	2018.92	A0A1W2PQR6;A0A1W2PQB7;A0A1W2PS43;A0A024RDG6;A0A1W2PRS1;Q14108;A0A1W2PRF6;A0A1W2PPX5	A0A1W2PQR6	245	262	SCARB2	Lysosome membrane protein 2	yes	no	2;3	1.7655e-21	176.21	18228000	0	0	43291000	0	19841000	314710000	1341200000	420770000	102	167	900;901;902;903;904;905;906	1376;1377;1378;1379;1380;1381;1382;1383;1384	1382	225		9	18228000	0	0	21101000	0	17074000	40657000	104820000	45665000
151	CNMTEEQSK	CERGWFGKLCQHPRKCNMTEEQSKNLCESA	CQHPRKCNMTEEQSKNLCESADGILCSGKG	K	C	N	S	K	N	9	0	1125.44	U3KPX5;B4DN32;A0A087WXI7;O14549;A0A087WY35;A0A024RDW7;O95965	U3KPX5	118	126	ITGBL1	Integrin beta-like protein 1	yes	no	2	0.0038557	167.23	0	0	0	5745600	0	0	0	0	0	105	168	907	1385	1385	228		1	0	0	0	2800600	0	0	0	0	0
152	CNTTQGNEVTSILR	DEGTVGVSAATERSRCNTTQGNEVTSILRW	RCNTTQGNEVTSILRWAKDAGKSVGIVTTT	R	C	N	L	R	W	14	0	1591.76	B7Z1D1;B2R6Q2;A0A024RAG0;P05186	B7Z1D1	87	100	ALPL	Alkaline phosphatase;Alkaline phosphatase, tissue-nonspecific isozyme	yes	no	2	3.5174e-269	340.93	0	0	0	238620000	118380000	113790000	613960000	1085900000	449500000	90	169	908;909;910;911;912;913	1386;1387;1388;1389;1390;1391;1392;1393;1394;1395;1396;1397;1398;1399;1400	1395	185		15	0	0	0	116310000	144280000	97921000	79318000	84862000	48783000
153	CNYSIR	ISSLEYPRSYPPDLRCNYSIRVERGLTLHL	PRSYPPDLRCNYSIRVERGLTLHLKFLEPF	R	C	N	I	R	V	6	0	811.365	B4E1B0;F5H2D0;Q53HU9;Q53HT9;A8K5J8;A0A3B3ISR2;B4DPQ0;P00736;D3DUT5	B4E1B0	114	119	C1R	Complement C1r subcomponent;Complement C1r subcomponent heavy chain;Complement C1r subcomponent light chain	yes	no	2	0.0027063	143.97	0	0	0	43294000	0	0	0	484650000	0	258	170	914;915	1401;1402	1401	491		0	0	0	0	21103000	0	0	0	37877000	0
154	CPDGFFSNETSSK	VVQAGTPERNTVCKRCPDGFFSNETSSKAP	KRCPDGFFSNETSSKAPCRKHTNCSVFGLL	R	C	P	S	K	A	13	0	1474.6	O00300	O00300	145	157	TNFRSF11B	Tumor necrosis factor receptor superfamily member 11B	yes	yes	2	2.9578e-109	272.32	66327000	248420000	157160000	0	0	0	0	0	345720000	502	171	916;917;918;919;920;921;922;923	1403;1404;1405;1406;1407;1408;1409;1410;1411;1412;1413;1414	1405	879		12	66327000	209870000	168500000	0	0	0	0	0	37520000
156	CQCEPGFQLGPNNR	RYCQHRCVNLPGSFRCQCEPGFQLGPNNRS	RCQCEPGFQLGPNNRSCV____________	R	C	Q	N	R	S	14	0	1675.72	E9PKA3;E9PRU1;Q9H3D5;Q96TF5;Q6FH22;B2RCM5;A0A024R5G1;Q59GI8;O95967	E9PKA3	186	199	EFEMP2;MBP1	EGF-containing fibulin-like extracellular matrix protein 2	yes	no	2	1.6793e-84	236.35	0	17042000	22044000	67056000	0	24040000	0	259790000	0	42	173	926;927;928;929;930;931;932;933	1417;1418;1419;1420;1421;1422;1423;1424	1420	70;71		8	0	14397000	23636000	32685000	0	20688000	0	20303000	0
157	CQEAINATCK	SPCCKNCQFETAQKKCQEAINATCKGVSYC	TAQKKCQEAINATCKGVSYCTGNSSECPPP	K	C	Q	C	K	G	10	0	1193.52	Q53RS1;B2RNB2;P78536	Q53RS1	253	262	ADAM17	Disintegrin and metalloproteinase domain-containing protein 17	yes	no	2	0.013772	90.15	0	0	0	4070400	0	0	0	0	0	336	174	934	1425	1425	616		1	0	0	0	1984000	0	0	0	0	0
158	CSDGWSFDATTLDDNGTMLFFK	VAEGETKPDPDVTERCSDGWSFDATTLDDN	DATTLDDNGTMLFFKGEFVWKSHKWDRELI	R	C	S	F	K	G	22	0	2527.07	P02790;B7Z8Q4;Q9BS19	P02790	50	71	HPX	Hemopexin	yes	no	2	1.602e-44	192.65	0	0	0	10565000	0	0	0	0	0	526	175	935	1426	1426	939		1	0	0	0	5149700	0	0	0	0	0
159	CSGDGLDSDGNQTLHWQAIGNPR	CVDCQPPAMNSVSLRCSGDGLDSDGNQTLH	DGNQTLHWQAIGNPRCQGTWKKVRRVDQCS	R	C	S	P	R	C	23	0	2497.1	Q8IVN8	Q8IVN8	217	239	SBSPON	Somatomedin-B and thrombospondin type-1 domain-containing protein	yes	yes	3	5.6497e-83	181.26	0	0	0	0	0	0	0	0	0	630	176	936	1427	1427	1179		1	0	0	0	0	0	0	0	0	0
161	CTDLDECSNGTHMCSQHADCK	FKCSCSPGWIGDGIKCTDLDECSNGTHMCS	CSNGTHMCSQHADCKNTMGSYRCLCKEGYT	K	C	T	C	K	N	21	0	2524.91	A0A384MDM4;P35555;B4E3I6	A0A384MDM4	1361	1381	FBN1	Fibrillin-1	yes	no	2;3;4	1.11e-46	209.9	0	0	0	321790000	0	0	94726000	114690000	93052000	242	178;179	939;940;941;942;943;944;945;946;947;948;949;950	1430;1431;1432;1433;1434;1435;1436;1437;1438;1439;1440;1441;1442;1443	1436	443	47	14	0	0	0	156850000	0	0	12238000	8963600	10099000
162	CTFDNLSPGLEYNVSVYTVK	______________________________	LSPGLEYNVSVYTVKDDKESVPISDTIIPA	-	C	T	V	K	D	20	0	2305.09	Q6N084	Q6N084	1	20	DKFZp686L11144		yes	yes	2	2.8348e-119	210.34	0	0	0	19623000	0	0	0	0	0	611	180	951;952;953	1444;1445;1446;1447	1447	1142		4	0	0	0	9564800	0	0	0	0	0
163	CVYEALCNTTSECPPPVITR	ANPDYRCAWCGGQSRCVYEALCNTTSECPP	LCNTTSECPPPVITRIQPETGPLGGGIRIT	R	C	V	T	R	I	20	0	2366.07	O15031	O15031	788	807	PLXNB2	Plexin-B2	yes	yes	2	3.458e-14	136.33	0	0	0	7590000	0	0	0	0	0	504	181	954	1448	1448	886		1	0	0	0	3699600	0	0	0	0	0
165	CYVIPLNTSIVMPPR	FNKKLTAYLDLNLDKCYVIPLNTSIVMPPR	CYVIPLNTSIVMPPRNLLELLINIKAGTYL	K	C	Y	P	R	N	15	0	1758.92	A0A3B3IUC0;Q9NX12;Q7Z528;A0A384MDP7;Q9Y287	A0A3B3IUC0	108	122	ITM2B	Integral membrane protein 2B;BRI2, membrane form;BRI2 intracellular domain;BRI2C, soluble form;Bri23 peptide	yes	no	2	2.0086e-12	150.94	0	68168000	43595000	13993000	0	0	0	0	0	244	183	960;961;962;963	1454;1455;1456;1457;1458;1459	1456	453		6	0	57589000	46742000	6820500	0	0	0	0	0
166	DAAALTNR	ACGPAMRLFGYKLARDAAALTNRSVSLLEE	FGYKLARDAAALTNRSVSLLEERGTFWVT_	R	D	A	N	R	S	8	0	830.425	Q7LGC8	Q7LGC8	458	465	CHST3	Carbohydrate sulfotransferase 3	yes	yes	2	0.0033538	161.11	76379000	108660000	112820000	21654000	0	40725000	280610000	492430000	584410000	623	184	964;965;966;967;968;969;970;971;972;973;974;975	1460;1461;1462;1463;1464;1465;1466;1467;1468;1469;1470;1471;1472	1460	1171		13	76379000	91793000	120960000	10555000	0	35047000	36252000	38485000	63424000
167	DACGNGTCR	NDDQTMCLDINECERDACGNGTCRNTIGSF	INECERDACGNGTCRNTIGSFNCRCNHGFI	R	D	A	C	R	N	9	0	1009.37	A0A384MDM4;P35555;B4E3I6;Q59HB9;H0YND0	A0A384MDM4	1898	1906	FBN1	Fibrillin-1	yes	no	2	0.0018469	145.16	0	0	0	7673800	0	0	0	0	0	242	185	976;977	1473;1474;1475;1476;1477;1478;1479;1480	1478	444		8	0	0	0	3740400	0	0	0	0	0
170	DAGVGFPEYQEEDNSTYNFR	RHTPRATLITFLCDRDAGVGFPEYQEEDNS	FPEYQEEDNSTYNFRWYTSYACPEEPLECV	R	D	A	F	R	W	20	0	2336.98	Q59EZ3;P11717	Q59EZ3	657	676	IGF2R	Cation-independent mannose-6-phosphate receptor	yes	no	2	2.8195e-25	157.75	0	0	0	18873000	0	0	0	0	0	541	188	981	1485;1486	1485	972		2	0	0	0	9199000	0	0	0	0	0
171	DAGVVCTNETR	CKSLGWLKSNCRHERDAGVVCTNETRSTHT	RHERDAGVVCTNETRSTHTLDLSRELSEAL	R	D	A	T	R	S	11	0	1220.55	B4DVE1;A0A0S2Z3Y1;Q08380;K7ESM3;K7EKQ5;K7EP36;K7EJY8	B4DVE1	106	116	LGALS3BP	Galectin-3-binding protein	yes	no	2	0.00010407	123.86	0	0	0	109320000	29238000	37941000	0	162380000	125800000	184	189	982;983;984;985;986	1487;1488;1489;1490;1491;1492;1493	1492	355		7	0	0	0	53287000	35635000	32651000	0	12690000	13653000
172	DALNVSQAWR	RGKGMGDHAFHTNARDALNVSQAWRWSLPY	HTNARDALNVSQAWRWSLPYEKVSRLQKAC	R	D	A	W	R	W	10	0	1158.58	Q8NCG5	Q8NCG5	326	335	CHST4	Carbohydrate sulfotransferase 4	yes	yes	1;2	5.3484e-31	230.06	15934000	29363000	39834000	0	0	0	247290000	86062000	161050000	639	190	987;988;989;990;991;992;993;994;995	1494;1495;1496;1497;1498;1499;1500;1501;1502;1503;1504	1503	1199		10	15934000	24806000	42710000	0	0	0	31948000	6726000	17478000
173	DASSFLAEWQNITK	AGVDGFQVRDIENLKDASSFLAEWQNITKG	KDASSFLAEWQNITKGFSEDRLLIAGTNSS	K	D	A	T	K	G	14	0	1608.78	A0A024R599;B4E2Z3;F5GZS6;J3KPF3;P08195	A0A024R599	254	267	SLC3A2	4F2 cell-surface antigen heavy chain	yes	no	2	1.8953e-13	196.24	0	0	0	38000000	0	18902000	0	0	0	40	191	996;997	1505;1506	1505	67		2	0	0	0	18522000	0	16266000	0	0	0
174	DAVITGNNFTFR	PACHLVFCGEPPAIKDAVITGNNFTFRNTV	AIKDAVITGNNFTFRNTVTYTCKEGYTLAG	K	D	A	F	R	N	12	0	1353.67	Q5JB40;A0A0A0MSD0;Q4LDE5	Q5JB40	1974	1985	SVEP1	Sushi, von Willebrand factor type A, EGF and pentraxin domain-containing protein 1	yes	no	2	6.8982e-05	130.98	0	0	0	22305000	0	18530000	0	0	0	154	192	998;999	1507;1508;1509	1508	308;309		3	0	0	0	10872000	0	15946000	0	0	0
175	DAVNNITAK	QHLVQANVRNKKVLKDAVNNITAKGITDYK	NKKVLKDAVNNITAKGITDYKKGFSFAFEQ	K	D	A	A	K	G	9	0	944.493	Q9UIU0;P54289;Q9UDL7	Q9UIU0	320	328	CACNA2D1	Voltage-dependent calcium channel subunit alpha-2/delta-1;Voltage-dependent calcium channel subunit alpha-2-1;Voltage-dependent calcium channel subunit delta-1	yes	no	2	0.015446	100.02	0	0	0	22630000	22528000	27410000	0	0	50977000	564	193	1000;1001;1002;1003	1510;1511;1512;1513	1510	1035		4	0	0	0	11030000	27458000	23588000	0	0	5532400
176	DAVQNCCGISK	VKTCAGQQDNGIRCRDAVQNCCGISKTEER	IRCRDAVQNCCGISKTEEREIQCSGYTLPT	R	D	A	S	K	T	11	0	1250.54	O75339	O75339	449	459	CILP	Cartilage intermediate layer protein 1;Cartilage intermediate layer protein 1 C1;Cartilage intermediate layer protein 1 C2	yes	yes	2	3.4572e-05	143.22	48832000	178820000	177850000	27480000	12756000	15707000	718080000	567600000	890930000	515	194	1004;1005;1006;1007;1008;1009;1010;1011;1012	1514;1515;1516;1517;1518;1519;1520;1521;1522;1523;1524;1525	1520	908		12	48832000	151070000	190690000	13395000	15547000	13517000	92769000	44359000	96690000
178	DCVECLLLHSGKPDNQTCHSLCR	CEKCPTCPDACSTKRDCVECLLLHSGKPDN	HSGKPDNQTCHSLCRDEVITWVDTIVKDDQ	R	D	C	C	R	D	23	0	2798.24	H7C5U2;D3DNA1;L7RT22;P18084	H7C5U2	330	352	ITGB5	Integrin beta;Integrin beta-5	yes	no	4	0.0020013	76.417	0	0	0	9215400	0	0	0	0	0	459	196	1016	1530	1530	811		1	0	0	0	4491800	0	0	0	0	0
181	DDLDPEKNDSEPGSQR	REDFASNEVVYYNAKDDLDPEKNDSEPGSQ	DLDPEKNDSEPGSQRIKPVFIEDANFGRQI	K	D	D	Q	R	I	16	1	1800.78	Q9UIU0;P54289;O95026;E7ERK3	Q9UIU0	129	144	CACNA2D1	Voltage-dependent calcium channel subunit alpha-2/delta-1;Voltage-dependent calcium channel subunit alpha-2-1;Voltage-dependent calcium channel subunit delta-1	yes	no	2	2.064e-11	145.71	0	0	0	9813800	0	0	0	0	0	564	199	1032	1551	1551	1036		1	0	0	0	4783500	0	0	0	0	0
182	DDNLEHYKNSTVMAR	YASVYTERFMGLPTKDDNLEHYKNSTVMAR	DDNLEHYKNSTVMARAEYFRNVDYLLIHGT	K	D	D	A	R	A	15	1	1791.82	A0A172Q3A0;A0A0D9SEN1;B2RD89;A0A140GPP7;Q12884;B4DLR2;H0YG61	A0A172Q3A0	644	658	FAP	Prolyl endopeptidase FAP;Antiplasmin-cleaving enzyme FAP, soluble form	yes	no	3	0.00020844	117.4	0	0	0	11164000	0	0	0	0	0	168	200	1033	1552	1552	329		1	0	0	0	5441600	0	0	0	0	0
183	DECWCPANSTGK	FCQIPCLNGGRCIGRDECWCPANSTGKFCH	IGRDECWCPANSTGKFCHLPIPQPDREPPG	R	D	E	G	K	F	12	0	1423.55	Q59EE6;G3V511;G3V3X5;Q6AZ94;Q14767	Q59EE6	293	304	LTBP2	Latent-transforming growth factor beta-binding protein 2	yes	no	2	5.014e-06	130.98	0	0	0	244690000	0	0	204350000	0	0	484	201	1034;1035;1036	1553;1554;1555;1556	1553	854		3	0	0	0	119270000	0	0	26400000	0	0
184	DEGTYTCALHHSGHSPPISSQNVTVLR	KYNMKVLYLSAFTSKDEGTYTCALHHSGHS	GHSPPISSQNVTVLRDKLVKCEGISLLAQN	K	D	E	L	R	D	27	0	2962.4	J3QRJ3;Q59GA0;E9PIM6;B0YJA4;E9PNQ8;P04216	J3QRJ3	81	107	THY1	Thy-1 membrane glycoprotein	yes	no	3;4;5	0	339.86	0	0	0	454830000	212310000	402960000	1518400000	2687300000	1086800000	317	202	1037;1038;1039;1040;1041;1042;1043;1044;1045;1046;1047;1048;1049;1050	1557;1558;1559;1560;1561;1562;1563;1564;1565;1566;1567;1568;1569;1570;1571;1572;1573;1574;1575;1576;1577;1578;1579;1580;1581	1572	587		25	0	0	0	221700000	258770000	346770000	196160000	210020000	117950000
187	DFEDLYTPVNGSIVIVR	TVTGKLVHANFGTKKDFEDLYTPVNGSIVI	EDLYTPVNGSIVIVRAGKITFAEKVANAES	K	D	F	V	R	A	17	0	1935.99	G3V0E5;A8K6Q8;P02786	G3V0E5	161	177	TFRC	Transferrin receptor protein 1;Transferrin receptor protein 1, serum form	yes	no	2	5.5406e-30	202.44	0	0	0	72375000	0	0	76101000	133660000	59291000	303	205	1056;1057;1058;1059	1587;1588;1589;1590	1587	564		4	0	0	0	35277000	0	0	9831500	10446000	6434600
190	DFLTDEANTSCNIWGNSTEYRPTPVEEDLR	IPIATRSGNRLLKLRDFLTDEANTSCNIWG	NSTEYRPTPVEEDLRRAPQLNHSNSDVVSI	R	D	F	L	R	R	30	0	3528.57	A8K8T0;Q9UKX5	A8K8T0	1024	1053	ITGA11	Integrin alpha-11	yes	no	3	7.6196e-66	178.33	0	0	0	10871000	0	0	0	0	0	307	208;209	1063;1064;1065	1594;1595;1596	1594	569;570		3	0	0	0	5298800	0	0	0	0	0
191	DFNETQLAR	______________________________	YCVGVKDFNETQLARIADSKDHVFPVNDGF	K	D	F	A	R	I	9	0	1092.52	H0YC24;Q53FL1;Q508I8;Q508I6;Q508I5;Q508I7;Q9H6X2	H0YC24	14	22	ANTXR1;ANTXR1/NNG1 fusion	Anthrax toxin receptor 1	yes	no	2	6.1148e-13	146.79	0	0	0	41707000	0	7183600	0	0	0	491	210	1066;1067;1068	1597;1598;1599	1599	869		3	0	0	0	20329000	0	6182000	0	0	0
192	DFVNASSK	KGETHEQVHSILHFKDFVNASSKYEITTIH	HSILHFKDFVNASSKYEITTIHNLFRKLTH	K	D	F	S	K	Y	8	0	866.413	Q8IVC0;P05546	Q8IVC0	185	192	SERPIND1	Heparin cofactor 2	yes	no	2	0.016651	107.59	10916000	63718000	0	66157000	0	0	0	0	0	533	211	1069;1070;1071;1072	1600;1601;1602;1603;1604	1602	953		5	10916000	53830000	0	32247000	0	0	0	0	0
193	DFYVDENTTVR	ALWEKPFISSRTTPKDFYVDENTTVRVPMM	TTPKDFYVDENTTVRVPMMLQDQEHHWYLH	K	D	F	V	R	V	11	0	1357.62	P29622;A0A024R6I9;B2R815	P29622	232	242	SERPINA4	Kallistatin	yes	no	2	0.0042596	105.4	0	0	0	0	0	6584900	128090000	454030000	211950000	52	212	1073;1074;1075;1076;1077	1605;1606;1607;1608;1609;1610	1608	85		6	0	0	0	0	0	5666800	16549000	35483000	23002000
199	DGQLLPSSNYSNIK	______________________________	RDGQLLPSSNYSNIKIYNTPSASYLEVTPD	R	D	G	I	K	I	14	0	1534.76	A0A087X1V2;H7BYX6;A0A087WTE4;A0A087WTF6;A0A087WX77;A0A087WWD4;A0A087WV75;P13591	A0A087X1V2	7	20	NCAM1	Neural cell adhesion molecule 1	yes	no	2	6.0747e-05	128.01	0	0	0	9266600	0	0	0	0	80401000	119	218	1086;1087;1088	1620;1621;1622	1622	244		3	0	0	0	4516800	0	0	0	0	8725600
202	DGTCIGNSSR	PCNKTACGVGEFRCRDGTCIGNSSRCNQFV	EFRCRDGTCIGNSSRCNQFVDCEDASDEMN	R	D	G	S	R	C	10	0	1065.45	Q07954;Q59FG2	Q07954	2614	2623	LRP1	Prolow-density lipoprotein receptor-related protein 1;Low-density lipoprotein receptor-related protein 1 85 kDa subunit;Low-density lipoprotein receptor-related protein 1 515 kDa subunit;Low-density lipoprotein receptor-related protein 1 intracellular domain	yes	no	2	5.7882e-11	206.23	0	10774000	0	62657000	0	0	157910000	329100000	160840000	575	221	1092;1093;1094;1095;1096;1097;1098	1626;1627;1628;1629;1630;1631;1632;1633	1628	1059		8	0	9102300	0	30541000	0	0	20401000	25720000	17455000
203	DGTPLSDGQSNHTVSSK	CHIDGHPRPTYQWFRDGTPLSDGQSNHTVS	TPLSDGQSNHTVSSKERNLTLRPAGPEHSG	R	D	G	S	K	E	17	0	1728.79	Q59FV9;Q13308;B7Z471;Q86X91	Q59FV9	205	221	PTK7	Inactive tyrosine-protein kinase 7	yes	no	2;3	2.3769e-14	147.39	0	0	0	0	0	9692300	34662000	15043000	34088000	578	222	1099;1100;1101;1102	1634;1635;1636;1637	1635	1086		4	0	0	0	0	0	8340900	4478100	1175600	3699500
204	DGTQQAVPLEHPSSPWGLNLTEK	LSSNALPPGPGLEQRDGTQQAVPLEHPSSP	LEHPSSPWGLNLTEKIKKIKIVFTPTICKQ	R	D	G	E	K	I	23	0	2503.23	Q59EE6;G3V511;G3V3X5;Q6AZ94;Q14767	Q59EE6	204	226	LTBP2	Latent-transforming growth factor beta-binding protein 2	yes	no	2;3	3.1002e-191	295.03	145980000	86284000	113630000	698930000	0	0	1757400000	2555300000	1772500000	484	223	1103;1104;1105;1106;1107;1108;1109;1110;1111;1112;1113;1114;1115;1116;1117;1118;1119	1638;1639;1640;1641;1642;1643;1644;1645;1646;1647;1648;1649;1650;1651;1652;1653;1654;1655;1656;1657;1658;1659;1660;1661;1662;1663;1664;1665;1666	1654	855		28	145980000	72894000	121830000	340680000	0	0	227050000	199710000	192360000
207	DHHGANFSCR	VGEPAEVTTTVLVRRDHHGANFSCRTELDL	VLVRRDHHGANFSCRTELDLRPQGLELFEN	R	D	H	C	R	T	10	0	1199.49	B4DNT6;B4DQW5;Q5NKV8;A0A384MEK5;P05362;Q15462;K7EKL8	B4DNT6	88	97	ICAM1;P3.58	Intercellular adhesion molecule 1	yes	no	3	0.00020749	131.09	53884000	32144000	36362000	84155000	32164000	124490000	56396000	98485000	95196000	246	226	1124;1125;1126;1127;1128;1129;1130;1131;1132	1672;1673;1674;1675;1676;1677;1678;1679;1680;1681;1682;1683;1684	1674	456		12	53884000	27156000	38987000	41020000	39202000	107130000	7285900	7696800	10331000
208	DIENFNSTQK	LFFLTESLTLPTQPRDIENFNSTQKFIEDN	PTQPRDIENFNSTQKFIEDNIEYITIIAFA	R	D	I	Q	K	F	10	0	1194.55	P43652	P43652	28	37	AFM	Afamin	yes	yes	2	0.019555	84.522	0	0	0	49028000	0	0	0	0	0	560	227	1133;1134;1135;1136	1685;1686;1687;1688	1685	1022		4	0	0	0	23898000	0	0	0	0	0
211	DILNGTFSYK	VHNSEENTMRALTLKDILNGTFSYKTFFPN	ALTLKDILNGTFSYKTFFPNWISGQEYLHQ	K	D	I	Y	K	T	10	0	1156.58	A0A172Q3A0;A0A0D9SEN1;B2RD89;A0A140GPP7;Q12884;B4DLR2;F8WF29;C9J131	A0A172Q3A0	19	28	FAP	Prolyl endopeptidase FAP;Antiplasmin-cleaving enzyme FAP, soluble form	yes	no	2	0.0054532	107.15	0	0	0	58400000	18586000	19500000	140360000	308700000	121920000	168	230	1139;1140;1141;1142;1143;1144	1691;1692;1693;1694;1695;1696;1697;1698	1695	330		8	0	0	0	28466000	22653000	16781000	18133000	24125000	13232000
212	DITDLINNTFIR	QSKLYRSEDYGKNFKDITDLINNTFIRTEF	NFKDITDLINNTFIRTEFGMAIGPENSGKV	K	D	I	I	R	T	12	0	1433.75	A0A0J9YVX1;A0A0J9YX61;A8KAQ3;Q99523	A0A0J9YVX1	20	31	SORT1	Sortilin	yes	no	2	0.011708	86.898	0	0	0	0	0	0	0	0	0	176	231	1145	1699	1699	344		1	0	0	0	0	0	0	0	0	0
213	DIVEYYNDSNGSHVLQGR	QLQKAREDIFMETLKDIVEYYNDSNGSHVL	EYYNDSNGSHVLQGRFGCEIENNRSSGAFW	K	D	I	G	R	F	18	0	2064.95	A0JLQ0;C9JEV0;A0A140VK00;P25311	A0JLQ0	103	120	AZGP1	Zinc-alpha-2-glycoprotein	yes	no	3	5.1847e-21	162.4	0	0	0	0	0	0	0	77089000	202490000	199	232	1146;1147	1700;1701;1702;1703	1702	375;376		3	0	0	0	0	0	0	0	6024600	21976000
215	DIYTFDGALNK	QNTTEVYVKWKFKGRDIYTFDGALNKSTVP	FKGRDIYTFDGALNKSTVPTDFSSAKIEVS	R	D	I	N	K	S	11	0	1255.61	A0A2R8Y484;A0A0A1TSG4;Q08722	A0A2R8Y484	19	29	CD47	Leukocyte surface antigen CD47	yes	no	2	3.4043e-05	136.21	81403000	106020000	74193000	233660000	0	0	1360200000	1554200000	1194500000	234	234	1149;1150;1151;1152;1153;1154;1155;1156;1157;1158;1159;1160;1161;1162	1705;1706;1707;1708;1709;1710;1711;1712;1713;1714;1715;1716;1717;1718;1719;1720	1715	428		15	81403000	89562000	79549000	113890000	0	0	175720000	121460000	129630000
217	DLCGPDAGPIGNATGQADCK	WPSLVFVFKNEDYFKDLCGPDAGPIGNATG	DAGPIGNATGQADCKAQDERFSLIFTLGS_	K	D	L	C	K	A	20	0	2015.87	E9PJT6;E9PLW1;E9PPE4;E9PLF2;E9PJL3;E9PSH9;E9PMZ1;E9PR64;B4DV87;E9PS74;B0AZP8;A8K2X6;A0A024R4Y2;Q8NBI5	E9PJT6	45	64	SLC43A3;hCG_39762	Solute carrier family 43 member 3	yes	no	2	1.5726e-54	216.54	0	6567400	0	16937000	0	0	0	154880000	0	39	236	1166;1167;1168;1169;1170	1728;1729;1730;1731;1732	1731	66		5	0	5548200	0	8255800	0	0	0	12104000	0
218	DLESVPPGFPANVTTLSLSANR	CGEKYGFQIADCAYRDLESVPPGFPANVTT	GFPANVTTLSLSANRLPGLPEGAFREVPLL	R	D	L	N	R	L	22	0	2284.17	A0A146E5L3;O14498;H0YN67;H0YL90	A0A146E5L3	40	61	ISLR	Immunoglobulin superfamily containing leucine-rich repeat protein	yes	no	2	1.4621e-24	145.69	0	0	0	24740000	0	0	0	0	0	202	237	1171	1733;1734;1735	1734	380		3	0	0	0	12059000	0	0	0	0	0
220	DLGPTLANSTHHNVR	CLGFTPEHQRDFIARDLGPTLANSTHHNVR	DLGPTLANSTHHNVRLLMLDDQRLLLPHWA	R	D	L	V	R	L	15	0	1630.82	P04062;B7Z7G9;A0A068F658;A0A0G2JLB3;D3DV87;A0A223PQI4;B7Z731;A0A068FB60;A0A0G2JNZ5;B2R6A7;B7Z6E6;A0A0G2JNZ0;B7Z6S9	P04062	302	316	GBA	Glucosylceramidase	yes	no	3	9.7938e-05	116.96	77955000	47718000	64713000	33961000	40846000	63940000	258660000	383040000	272800000	111	239	1176;1177;1178;1179;1180;1181;1182;1183;1184	1740;1741;1742;1743;1744;1745;1746;1747;1748;1749;1750;1751;1752;1753	1753	237		14	77955000	40313000	69385000	16554000	49784000	55025000	33417000	29936000	29606000
222	DLNETIHYMYK	STGILVFPNEDLHVKDLNETIHYMYKHKMY	LHVKDLNETIHYMYKHKMYRKMVFYIEACE	K	D	L	Y	K	H	11	0	1425.66	B7Z4A4;B7Z4S8;Q6I9U9;Q53XC6;A8K669;Q99538;G3V4E4	B7Z4A4	130	140	LGMN	Legumain	yes	no	2;3	6.4554e-46	238.51	0	0	0	35862000	0	0	0	361220000	0	299	241	1192;1193;1194;1195	1762;1763;1764;1765	1762	556		4	0	0	0	17480000	0	0	0	28230000	0
223	DLNGNVFQDAVFNQTVTVIER	MGGRPFGLVINLNYKDLNGNVFQDAVFNQT	FQDAVFNQTVTVIEREDGLDGETIFMYMFL	K	D	L	E	R	E	21	0	2378.19	C9JY01;C9JBX5;C9J3L8;C9J5W0;B2R6N9;A0A3B3IRT8;E9PAL7;C9IZQ1;P43307	C9JY01	16	36	SSR1	Translocon-associated protein subunit alpha	yes	no	2	6.9597e-182	241.93	0	0	0	0	0	0	0	0	0	256	242;243	1196;1197;1198;1199	1766;1767;1768;1769	1766	487;488;489		4	0	0	0	0	0	0	0	0	0
227	DLQSLEDILHQVENK	GIADFLSTYQTKVDKDLQSLEDILHQVENK	DLQSLEDILHQVENKTSEVKQLIKAIQLTY	K	D	L	N	K	T	15	0	1779.9	A0A140VJJ6;C9JEU5;C9JC84;P02679	A0A140VJJ6	65	79	FGG	Fibrinogen gamma chain	yes	no	2;3	0	369.8	57974000	169050000	27678000	101370000000	5061900000	59355000000	13436000000	39062000000	18635000000	195	247	1215;1216;1217;1218;1219;1220;1221;1222;1223;1224;1225;1226;1227;1228;1229;1230;1231;1232;1233;1234;1235;1236;1237;1238;1239;1240;1241;1242;1243;1244;1245;1246;1247;1248;1249;1250	1790;1791;1792;1793;1794;1795;1796;1797;1798;1799;1800;1801;1802;1803;1804;1805;1806;1807;1808;1809;1810;1811;1812;1813;1814;1815;1816;1817;1818;1819;1820;1821;1822;1823;1824;1825;1826;1827;1828;1829;1830;1831;1832;1833;1834;1835;1836;1837;1838;1839;1840;1841;1842;1843;1844;1845;1846;1847	1815	370		57	57974000	142810000	29676000	49409000000	6169500000	51079000000	1735800000	3052800000	2022400000
228	DLQSLEDILHQVENKTSEVK	GIADFLSTYQTKVDKDLQSLEDILHQVENK	EDILHQVENKTSEVKQLIKAIQLTYNPDES	K	D	L	V	K	Q	20	1	2324.19	A0A140VJJ6;C9JEU5;C9JC84;P02679	A0A140VJJ6	65	84	FGG	Fibrinogen gamma chain	yes	no	3	1.6032e-49	167.16	0	0	0	425760000	0	0	0	0	0	195	248	1251;1252	1848;1849	1849	370		1	0	0	0	207530000	0	0	0	0	0
230	DMNQTLGDNITVK	DVKILIAFISYKDFRDMNQTLGDNITVKMY	FRDMNQTLGDNITVKMYSPSWPNFDYTMVV	R	D	M	V	K	M	13	0	1447.7	H0YNA7;Q8TCT8	H0YNA7	105	117	SPPL2A	Signal peptide peptidase-like 2A	yes	no	2	1.8083e-08	178.67	0	0	0	30893000	0	0	0	491720000	247070000	493	250;251	1255;1256;1257;1258	1852;1853;1854;1855	1853	871;872		4	0	0	0	15058000	0	0	0	38429000	26814000
231	DMSDGFISNLTIQR	RLNTEWSELENLVLKDMSDGFISNLTIQRQ	KDMSDGFISNLTIQRQYFPNDEDQVGAAKA	K	D	M	Q	R	Q	14	0	1595.76	Q5VSQ6;P13674	Q5VSQ6	105	118	P4HA1	Prolyl 4-hydroxylase subunit alpha-1	yes	no	2	1.2699e-17	204.69	13319000	0	0	558030000	0	0	114160000	1064800000	184190000	545	252;253	1259;1260;1261;1262;1263;1264;1265;1266;1267;1268;1269;1270;1271	1856;1857;1858;1859;1860;1861;1862;1863;1864;1865;1866;1867;1868	1857	983	104	12	13319000	0	0	272000000	0	0	14749000	83217000	19990000
232	DNATDSVPLR	SDRTHANGSIKRGSKDNATDSVPLRTGIGV	KRGSKDNATDSVPLRTGIGVQLKDIKVFNR	K	D	N	L	R	T	10	0	1086.53	Q07954	Q07954	2126	2135	LRP1	Prolow-density lipoprotein receptor-related protein 1;Low-density lipoprotein receptor-related protein 1 85 kDa subunit;Low-density lipoprotein receptor-related protein 1 515 kDa subunit;Low-density lipoprotein receptor-related protein 1 intracellular domain	yes	yes	2	5.5819e-10	202.05	0	0	0	224900000	0	0	0	0	1099900000	575	254	1272;1273;1274;1275	1869;1870;1871;1872;1873	1870	1060		4	0	0	0	109620000	0	0	0	0	119370000
233	DNATEEEILVYLEK	DICKDVVTAAGDMLKDNATEEEILVYLEKT	KDNATEEEILVYLEKTCDWLPKPNMSASCK	K	D	N	E	K	T	14	0	1664.81	Q53FJ5;A0A024QZQ2;C9JIZ6;B4DRB7;Q59EN5;P07602;B4DEK5	Q53FJ5	79	92	PSAP	Prosaposin;Saposin-A;Saposin-B-Val;Saposin-B;Saposin-C;Saposin-D	yes	no	2	4.2911e-70	240.59	0	0	0	24548000	0	0	63941000	111350000	0	11	255	1276;1277;1278;1279	1874;1875;1876;1877;1878	1878	14		5	0	0	0	11966000	0	0	8260600	8702100	0
237	DNHTHSDIQVK	EPSMRAFLLSLAALRDNHTHSDIQVKLFVV	AALRDNHTHSDIQVKLFVVPADEAQALSPA	R	D	N	V	K	L	11	0	1292.61	B4DEL6;A0A024R0Q4;Q8IV08	B4DEL6	367	377	PLD3	Phospholipase D3	yes	no	2;3	1.6179e-05	168.83	0	4739600	0	4546100	0	0	14283000	0	17505000	20	260	1290;1291;1292;1293	1891;1892;1893;1894	1893	23		4	0	4004100	0	2215900	0	0	1845300	0	1899700
238	DNTTCYEFK	RTVSCACPHLMKLHKDNTTCYEFKKFLLYA	LMKLHKDNTTCYEFKKFLLYARQMEIRGVD	K	D	N	F	K	K	9	0	1176.48	Q07954	Q07954	1574	1582	LRP1	Prolow-density lipoprotein receptor-related protein 1;Low-density lipoprotein receptor-related protein 1 85 kDa subunit;Low-density lipoprotein receptor-related protein 1 515 kDa subunit;Low-density lipoprotein receptor-related protein 1 intracellular domain	yes	yes	2	1.6443e-27	164.96	18007000	6769500	19023000	63479000	21272000	30766000	392390000	781490000	335070000	575	261	1294;1295;1296;1297;1298;1299;1300;1301;1302;1303	1895;1896;1897;1898;1899;1900;1901;1902;1903;1904;1905;1906	1897	1061		12	18007000	5719000	20397000	30941000	25926000	26477000	50693000	61075000	36364000
239	DNTTVTR	LASMGLQLNLTYERKDNTTVTRLLNINPNK	LNLTYERKDNTTVTRLLNINPNKTSASGSC	K	D	N	T	R	L	7	0	805.393	B3KRY3;A0A024RDY3;P11279;Q59FZ0	B3KRY3	226	232	LAMP1	Lysosome-associated membrane glycoprotein 1	yes	no	2	0.014991	117.18	0	0	0	0	0	0	0	0	0	106	262	1304;1305;1306	1907;1908;1909	1908	229		3	0	0	0	0	0	0	0	0	0
240	DNYTDLVAIQNK	______________________________	FCRDNYTDLVAIQNKAEIEYLEKTLPFSRS	R	D	N	N	K	A	12	0	1392.69	B4DQA0;A0A0H5AY34;Q8WW79;P14151	B4DQA0	12	23	SELL	L-selectin	yes	no	2	2.8782e-28	225.01	0	0	0	0	0	0	0	35806000	0	175	263	1307	1910	1910	343		1	0	0	0	0	0	0	0	2798300	0
241	DPAGSYHLNLSSHFR	ADHRPYTFFISPGSRDPAGSYHLNLSSHFR	DPAGSYHLNLSSHFRWSALQVSVGLYTSLC	R	D	P	F	R	W	15	0	1699.81	P98161;Q15142;H3BV77;O75276	P98161	2986	3000	PKD1	Polycystin-1	yes	no	3	0.01243	61.409	0	0	0	0	0	0	0	0	0	568	264	1308	1911	1911	1046		1	0	0	0	0	0	0	0	0	0
242	DPAGWLNINPINGTVDTTAVLDR	PDSLQHQTIRYSVYKDPAGWLNINPINGTV	NPINGTVDTTAVLDRESPFVDNSVYTALFL	K	D	P	D	R	E	23	0	2451.24	B7Z236;B7Z3H7;P55290;B7Z985;B7Z9B1	B7Z236	221	243	CDH13	Cadherin-13	yes	no	2;3	0	383.26	0	0	0	154790000	0	0	347880000	1443400000	233310000	416	265	1309;1310;1311;1312	1912;1913;1914;1915;1916	1912	744		5	0	0	0	75451000	0	0	44943000	112810000	25320000
243	DPGAAVPGAANASAQQPR	SLLSLGSQYQPQRRRDPGAAVPGAANASAQ	AAVPGAANASAQQPRTPILLIRDNRTAAAR	R	D	P	P	R	T	18	0	1676.82	Q96PQ9;D0PNI2;P28300	Q96PQ9	71	88	LOX	Protein-lysine 6-oxidase	yes	no	2	1.4087e-18	150.11	0	0	0	0	74332000	73491000	0	0	0	457	266	1313;1314;1315;1316;1317	1917;1918;1919;1920;1921	1919	807		5	0	0	0	0	90596000	63244000	0	0	0
247	DQGSAYANR	LTDTKQLVHSFAEGQDQGSAYANRTALFPD	SFAEGQDQGSAYANRTALFPDLLAQGNASL	Q	D	Q	N	R	T	9	0	980.431	B4DK26;A8K6Q6;Q5ZPR3;A8K9J6;A0A0C4DGH0	B4DK26	30	38	CD276	CD276 antigen	yes	no	2	0.016175	98.933	0	0	0	0	0	0	0	9694000	0	302	271	1487	2191	2191	561		1	0	0	0	0	0	0	0	757610	0
248	DQGSPALSANVSLR	DHEQLRAFELTLQARDQGSPALSANVSLRV	RDQGSPALSANVSLRVLVGDLNDNAPRVLY	R	D	Q	L	R	V	14	0	1413.72	Q3SY74;Q9Y5G0;Q9UN71;Q9Y5G3;Q9Y5F8;Q9Y5G2	Q3SY74	532	545	PCDHGB1;PCDHGB5;PCDHGB4;PCDHGB7;PCDHGB2	Protocadherin gamma-B5;Protocadherin gamma-B4;Protocadherin gamma-B1;Protocadherin gamma-B7;Protocadherin gamma-B2	yes	no	2	0.0037356	85.672	0	0	0	9938100	0	0	0	0	0	591	272	1488;1489	2192;2193	2193	1106		2	0	0	0	4844100	0	0	0	0	0
249	DQLLVAHHSEGATNNSQK	GKQELGIHLAARGPKDQLLVAHHSEGATNN	LVAHHSEGATNNSQKAFGCPGEPAPNVAHF	K	D	Q	Q	K	A	18	0	1947.94	Q6UXX5	Q6UXX5	527	544	ITIH6	Inter-alpha-trypsin inhibitor heavy chain H6	yes	yes	3	1.3664e-30	201.06	26403000	48249000	31851000	22230000	13740000	0	146620000	238640000	139950000	617	273	1490;1491;1492;1493;1494;1495;1496;1497	2194;2195;2196;2197;2198;2199;2200;2201;2202;2203;2204;2205;2206;2207;2208;2209	2204	1153		16	26403000	40761000	34151000	10836000	16746000	0	18943000	18651000	15188000
250	DQPNVSAACLEFK	GKLYGIRDVRSTRDRDQPNVSAACLEFKCS	DRDQPNVSAACLEFKCSGMLYDQDRVDRTL	R	D	Q	F	K	C	13	0	1477.69	O75339	O75339	997	1009	CILP	Cartilage intermediate layer protein 1;Cartilage intermediate layer protein 1 C1;Cartilage intermediate layer protein 1 C2	yes	yes	2	3.0622e-10	152.7	0	0	246590000	0	0	0	894380000	568920000	594510000	515	274	1498;1499;1500;1501;1502;1503;1504;1505;1506;1507	2210;2211;2212;2213;2214;2215;2216;2217;2218;2219	2214	909		9	0	0	264390000	0	0	0	115550000	44462000	64520000
251	DRDQPNVSAACLEFK	TVGKLYGIRDVRSTRDRDQPNVSAACLEFK	DRDQPNVSAACLEFKCSGMLYDQDRVDRTL	R	D	R	F	K	C	15	1	1748.82	O75339	O75339	995	1009	CILP	Cartilage intermediate layer protein 1;Cartilage intermediate layer protein 1 C1;Cartilage intermediate layer protein 1 C2	yes	yes	2;3	6.5169e-156	293.95	182720000	163540000	198430000	36807000	0	36916000	1098600000	767370000	2168100000	515	275;276	1508;1509;1510;1511;1512;1513;1514;1515;1516;1517;1518	2220;2221;2222;2223;2224;2225;2226;2227;2228;2229;2230;2231;2232;2233;2234;2235;2236;2237;2238;2239;2240;2241	2229	909		21	182720000	138160000	212750000	17941000	0	31768000	141930000	59972000	235300000
252	DSCESNHNITCK	YSPNLVFSGIEAIQKDSCESNHNITCKVGY	IQKDSCESNHNITCKVGYPFLRRGEMVTFK	K	D	S	C	K	V	12	0	1463.58	B4DTY8;P56199	B4DTY8	876	887	ITGA1	Integrin alpha-1	yes	no	3	0.0029237	90.926	0	0	0	4272400	0	0	0	0	0	391	277	1519	2242	2242	704		1	0	0	0	2082500	0	0	0	0	0
253	DSCQQGSNMTLIGENGHSTDTLTGSGFR	APVICKRTCLKGQCRDSCQQGSNMTLIGEN	ENGHSTDTLTGSGFRVGPAPRGECARPSPA	R	D	S	F	R	V	28	0	2969.29	H0YE75;E9PRF2;H0YC99;Q9NS15	H0YE75	18	45	LTBP3	Latent-transforming growth factor beta-binding protein 3	yes	no	3	0.0069581	45.125	0	0	0	0	0	0	0	0	0	476	278	1520	2243	2243	846		1	0	0	0	0	0	0	0	0	0
255	DSEAFCHANCSGPAPAAKPDPDGGR	ARYLEAALRLHRLLRDSEAFCHANCSGPAP	SGPAPAAKPDPDGGRADEWACELRLFGRVL	R	D	S	G	R	A	25	0	2583.09	Q92791;B4DVZ5	Q92791	71	95	LEPREL4	Synaptonemal complex protein SC65	yes	no	3	2.3618e-53	184.76	0	0	0	15506000	0	0	0	0	56692000	396	280	1524;1525	2247;2248;2249	2249	714		3	0	0	0	7558300	0	0	0	0	6152600
256	DSLSINATNIK	PCRKVCNGIGIGEFKDSLSINATNIKHFKN	GEFKDSLSINATNIKHFKNCTSISGDLHIL	K	D	S	I	K	H	11	0	1174.62	P00533;E7BSV0;A8K2T7;A9CB80;Q2TTR7;F2YGG7;E9PFD7;B7Z2I3;Q504U8;Q59FL8;Q68GS6;A0A1W2PRR9;Q147T7;A2VCQ7;F1JTL6	P00533	347	357	EGFR	Epidermal growth factor receptor;Receptor protein-tyrosine kinase	yes	no	2	0.0053139	91.584	0	0	0	4316500	0	0	0	0	0	219	281	1526	2250	2250	413		1	0	0	0	2104000	0	0	0	0	0
257	DSNVTLAPSGPK	ETAADECPPCVHGARDSNVTLAPSGPKGGK	GARDSNVTLAPSGPKGGKGERGLPGPPGSK	R	D	S	P	K	G	12	0	1184.6	A6NCT7;Q07092	A6NCT7	325	336	COL16A1	Collagen alpha-1(XVI) chain	yes	no	2	0.0095924	84.658	0	0	0	4542200	0	0	0	0	0	286	282	1527	2251;2252	2252	535		2	0	0	0	2214000	0	0	0	0	0
258	DSPVLPVTLQCNLTSSSHTLTYSYWTK	LQKPRIVTSEEVIIRDSPVLPVTLQCNLTS	LTSSSHTLTYSYWTKNGVELSATRKNASNM	R	D	S	T	K	N	27	0	3097.51	Q9UFM8;Q9Y639;H3BQ94	Q9UFM8	123	149	DKFZp566H1924;NPTN	Neuroplastin	yes	no	3	1.6318e-49	169.36	0	16938000	0	0	0	0	65500000	207710000	0	667	283	1528;1529;1530;1531;1532	2253;2254;2255;2256;2257;2258;2259	2256	1249		7	0	14309000	0	0	0	0	8462000	16233000	0
259	DSSGVIHVMLNGSEPTGAYPIK	PVDSFWKRASIQYSKDSSGVIHVMLNGSEP	VMLNGSEPTGAYPIKGFFADYEIPNLQKEK	K	D	S	I	K	G	22	0	2271.12	H0Y8G4;H0Y984;A6NC48;A0A386NEX7;Q10588	H0Y8G4	32	53	BST1	ADP-ribosyl cyclase/cyclic ADP-ribose hydrolase 2	yes	no	3	2.044e-13	130.89	0	0	0	11069000	0	0	0	0	47864000	253	284	1533;1534	2260;2261;2262	2260	484		3	0	0	0	5395400	0	0	0	0	5194500
261	DTAVFECLPQHAMFGNDTITCTTHGNWTK	LRVYKPSAGNNSLYRDTAVFECLPQHAMFG	GNDTITCTTHGNWTKLPECREVKCPFPSRP	R	D	T	T	K	L	29	0	3351.47	D9IWP9;A0A384NKM6;P02749;J3QLI0	D9IWP9	149	177	APOH	Beta-2-glycoprotein 1	yes	no	3;4	8.9492e-271	307.86	159500000	462940000	149010000	352920000	0	0	1514600000	6633500000	3023100000	249	286;287	1542;1543;1544;1545;1546;1547;1548;1549;1550;1551;1552;1553;1554;1555;1556;1557	2273;2274;2275;2276;2277;2278;2279;2280;2281;2282;2283;2284;2285;2286;2287;2288;2289;2290;2291;2292;2293;2294;2295	2281	466;467	52	22	159500000	391100000	159770000	172020000	0	0	195670000	518420000	328090000
262	DTCTQECSYFNITK	KECVQCRAFNKGEKKDTCTQECSYFNITKV	KDTCTQECSYFNITKVESRDKLPQPVQPDP	K	D	T	T	K	V	14	0	1765.73	P05556	P05556	659	672	ITGB1	Integrin beta-1	yes	yes	2	6.5141e-72	233.13	0	0	0	68287000	0	33525000	0	486000000	316730000	534	288	1558;1559;1560;1561;1562	2296;2297;2298;2299;2300;2301;2302;2303;2304	2296	955		9	0	0	0	33285000	0	28851000	0	37982000	34374000
265	DTFVNASR	TSVSQIFHSPDLAIRDTFVNASRTLYSSSP	SPDLAIRDTFVNASRTLYSSSPRVLSNNSD	R	D	T	S	R	T	8	0	908.435	Q5UGI6;A0A348GSH7;H9KV48;E9KL26;A0A384MDV8;E9PGN7;P05155	Q5UGI6	67	74	SERPING1	Plasma protease C1 inhibitor	yes	no	2	0.0032224	157.21	37164000	146160000	53097000	270420000	0	0	1065200000	2636900000	1767100000	241	291	1568;1569;1570;1571;1572;1573;1574	2311;2312;2313;2314;2315;2316;2317	2316	439		7	37164000	123480000	56931000	131810000	0	0	137610000	206080000	191780000
268	DTNGSQFFITTVK	KHYGPGWVSMANAGKDTNGSQFFITTVKTA	GKDTNGSQFFITTVKTAWLDGKHVVFGKVL	K	D	T	V	K	T	13	0	1456.72	V9HWC6;P23284	V9HWC6	138	150	HEL-S-39;PPIB	Peptidyl-prolyl cis-trans isomerase;Peptidyl-prolyl cis-trans isomerase B	yes	no	2	1.4561e-127	285.13	23784000	32560000	31230000	0	0	0	70267000	0	97988000	552	296	1601;1602;1603;1604;1605;1606	2356;2357;2358;2359;2360;2361;2362;2363;2364;2365;2366;2367;2368	2360	996		13	23784000	27507000	33484000	0	0	0	9077900	0	10634000
271	DTWGLSDEHFQPRPEAVQFFNVTTLQK	DKVMQQNLVYYQYHRDTWGLSDEHFQPRPE	RPEAVQFFNVTTLQKELYDFAKENIMDDDE	R	D	T	Q	K	E	27	0	3189.55	B3KS71;C9JP16;Q8NB01;B3KME2;O75718;B4DPA3;B3KX16	B3KS71	285	311	CRTAP	Cartilage-associated protein	yes	no	3	3.3866e-79	216.51	0	0	0	0	0	0	0	676240000	0	339	299	1612	2375;2376	2375	620		2	0	0	0	0	0	0	0	52850000	0
272	DVDECALGTHNCSEAETCHNIQGSFR	PEQGYTMTANGRSCKDVDECALGTHNCSEA	CSEAETCHNIQGSFRCLRFECPPNYVQVSK	K	D	V	F	R	C	26	0	3006.23	H7BXL0;B7Z6T9;Q9Y3V7;Q86V58;B7Z9B8;P98095	H7BXL0	44	69	FBLN2;DKFZp586A1519	Fibulin-2	yes	no	3;4	5.1061e-254	308.03	0	0	0	46595000	0	0	1422600000	439200000	0	427	300	1613;1614;1615;1616	2377;2378;2379;2380;2381	2378	764		5	0	0	0	22712000	0	0	183790000	34324000	0
273	DVECGEGHFCHDNQTCCR	QPATFLARSPHVGVKDVECGEGHFCHDNQT	CGEGHFCHDNQTCCRDNRQGWACCPYRQPG	K	D	V	C	R	D	18	0	2279.82	K7EQI0;K7EKL3;K7EQ05;B4E1G5;B4DJI2;P28799	K7EQI0	63	80	GRN	Granulins;Acrogranin;Paragranulin;Granulin-1;Granulin-2;Granulin-3;Granulin-4;Granulin-5;Granulin-6;Granulin-7	yes	no	3;4	3.0376e-22	179.03	0	0	10924000	0	0	0	156020000	100130000	176200000	371	301	1617;1618;1619;1620;1621;1622	2382;2383;2384;2385;2386;2387;2388;2389	2384	672		8	0	0	11713000	0	0	0	20156000	7825300	19123000
274	DVNCSVMGPQEK	LGTWVFQVGSSGSQRDVNCSVMGPQEKKVV	SQRDVNCSVMGPQEKKVVVYLQKLDTAYDD	R	D	V	E	K	K	12	0	1362.59	B4DJQ8;P53634	B4DJQ8	34	45	CTSC	Dipeptidyl peptidase 1;Dipeptidyl peptidase 1 exclusion domain chain;Dipeptidyl peptidase 1 heavy chain;Dipeptidyl peptidase 1 light chain	yes	no	2	0.016575	78.653	0	0	0	0	0	0	0	17972000	0	373	302	1623	2390	2390	677	70	1	0	0	0	0	0	0	0	1404500	0
275	DVTVIEGEVATISCQVNK	ASGHTSGDGQNLFTKDVTVIEGEVATISCQ	VIEGEVATISCQVNKSDDSVIQLLNPNRQT	K	D	V	N	K	S	18	0	1960.98	F5H125;H0YG94;A0A087X0T8;A0A4Z1;A0A087X1W8;A0A0A0MTJ8;X5D8W0;X5DQS5;X5DQR8;X5DNF2;X5D7A8;Q9BY67	F5H125	18	35	CADM1	Cell adhesion molecule 1	yes	no	2	3.3955e-67	235.31	0	0	0	29794000	0	0	0	0	0	142	303	1624	2391	2391	277		1	0	0	0	14523000	0	0	0	0	0
280	DVVTAAGDMLKDNATEEEILVYLEK	WNKPTVKSLPCDICKDVVTAAGDMLKDNAT	KDNATEEEILVYLEKTCDWLPKPNMSASCK	K	D	V	E	K	T	25	1	2765.37	Q53FJ5;A0A024QZQ2;C9JIZ6;B4DRB7;Q59EN5;P07602	Q53FJ5	68	92	PSAP	Prosaposin;Saposin-A;Saposin-B-Val;Saposin-B;Saposin-C;Saposin-D	yes	no	3	0.0038678	66.853	12497000	0	0	0	0	0	0	0	0	11	308	1640	2409	2409	14		1	12497000	0	0	0	0	0	0	0	0
282	DYFTDLITNESINYFK	CRNGIKEKHGFDYAKDYFTDLITNESINYF	YFTDLITNESINYFKMSKRMYPHRPVMMVI	K	D	Y	F	K	M	16	0	1981.93	Q7Z2W2;A0A024R809;Q8IWU6	Q7Z2W2	189	204	DKFZp686F13142;SULF1	Extracellular sulfatase Sulf-1	yes	no	2	3.5169e-14	166.04	0	0	0	8925200	0	0	0	0	0	63	310	1642	2411	2411	103		1	0	0	0	4350400	0	0	0	0	0
283	DYSLTFGAINQTWSYR	LYHYSDSTVTSTSSRDYSLTFGAINQTWSY	YSLTFGAINQTWSYRIHQNITYQVCRHAPR	R	D	Y	Y	R	I	16	0	1920.9	Q8IV28;A0A087WZP6;Q5CZI2;Q14112	Q8IV28	278	293	NID2;DKFZp686D12108	Nidogen-2	yes	no	2	0.00028825	100.07	0	0	0	53883000	0	25028000	0	224890000	0	137	311	1643;1644;1645;1646;1647	2412;2413;2414;2415;2416;2417;2418	2417	264		7	0	0	0	26264000	0	21539000	0	17576000	0
284	DYYPINESLASLPLR	YYPIIYFNDYWNLQKDYYPINESLASLPLR	DYYPINESLASLPLRVSFCPLSLWRWQLYA	K	D	Y	L	R	V	15	0	1749.89	A0A0S2Z3H6;A0A0S2Z3H2;O96005	A0A0S2Z3H6	290	304	CLPTM1	Cleft lip and palate transmembrane protein 1	yes	no	2	7.0809e-14	153.95	0	0	0	37367000	0	0	0	133970000	0	180	312	1648;1649;1650	2419;2420;2421	2419	347		3	0	0	0	18214000	0	0	0	10470000	0
286	EAFALNSSTGELR	LRYSLLEAGPGPEGREAFALNSSTGELRAR	GREAFALNSSTGELRARVPFDYEHTESFRL	R	E	A	L	R	A	13	0	1393.68	Q96JQ0	Q96JQ0	2756	2768	DCHS1	Protocadherin-16	yes	yes	2	0.0095867	86.014	0	0	0	0	0	0	0	0	0	651	314	1661	2437	2437	1215		1	0	0	0	0	0	0	0	0	0
287	EAGNHTSGAGLVQINK	GQGSDTYIYIFRVCREAGNHTSGAGLVQIN	AGNHTSGAGLVQINKSNGKETVVGRLNETH	R	E	A	N	K	S	16	0	1594.81	H0YGE9;F5GXU0;F5H883;F5GX30;Q6I9U3;Q53GY9;B2R6S2;P20645	H0YGE9	26	41	M6PR	Cation-dependent mannose-6-phosphate receptor	yes	no	2;3	7.0686e-101	264.22	0	0	0	52856000	0	0	566610000	872990000	0	320	315	1662;1663;1664;1665;1666	2438;2439;2440;2441;2442;2443;2444	2440	590		7	0	0	0	25763000	0	0	73201000	68226000	0
288	EAGNITTDGYEILGK	KIYIDCYEIIEKDIKEAGNITTDGYEILGK	EAGNITTDGYEILGKLLKGERKSAAFQIQS	K	E	A	G	K	L	15	0	1579.77	A0A087X0A8;B9EJB8;D6RGG3;Q99715;H0Y5N9	A0A087X0A8	1487	1501	COL12A1	Collagen alpha-1(XII) chain	yes	no	1;2	1.1657e-142	260.19	278960000	630610000	392280000	11701000000	14627000	117410000	7891200000	22500000000	5421400000	138	316	1667;1668;1669;1670;1671;1672;1673;1674;1675;1676;1677;1678;1679;1680;1681;1682;1683;1684;1685;1686;1687;1688	2445;2446;2447;2448;2449;2450;2451;2452;2453;2454;2455;2456;2457;2458;2459;2460;2461;2462;2463;2464;2465;2466;2467;2468;2469;2470;2471;2472;2473;2474;2475;2476;2477;2478;2479;2480;2481;2482;2483	2460	266		37	278960000	532740000	420610000	5703200000	17828000	101040000	1019500000	1758400000	588360000
289	EAGQNVTFCCK	LEKPYLVKHPESRVREAGQNVTFCCKASGT	SRVREAGQNVTFCCKASGTPMPKKYSWFHN	R	E	A	C	K	A	11	0	1312.55	K7EPJ4;B2RAJ0;Q8IUL8	K7EPJ4	310	320	CILP2	Cartilage intermediate layer protein 2;Cartilage intermediate layer protein 2 C1;Cartilage intermediate layer protein 2 C2	yes	no	2	5.3899e-18	208.59	468880000	1347800000	1476800000	140910000	67953000	167100000	6189000000	7015700000	0	329	317	1689;1690;1691;1692;1693;1694;1695;1696	2484;2485;2486;2487;2488;2489;2490;2491;2492;2493;2494;2495;2496;2497	2496	604		14	468880000	1138700000	1583400000	68686000	82821000	143800000	799560000	548290000	0
290	EAINITLDHK	DQLFYTKVYIDPLKREAINITLDHKCKIFQ	DPLKREAINITLDHKCKIFQTLNGAVDEVV	R	E	A	H	K	C	10	0	1152.61	E7ETU9;B4DHG3;O00469;C9JXZ0	E7ETU9	151	160	PLOD2	Procollagen-lysine,2-oxoglutarate 5-dioxygenase 2	yes	no	2;3	7.3845e-14	202.2	20860000	0	0	168380000	26488000	112290000	567680000	1000700000	0	368	318	1697;1698;1699;1700;1701;1702;1703;1704;1705;1706;1707;1708	2498;2499;2500;2501;2502;2503;2504;2505;2506;2507;2508;2509;2510;2511;2512;2513	2500	665		16	20860000	0	0	82072000	32284000	96631000	73339000	78204000	0
291	EANLTSSVTILPLPLQNATVEAGTR	PQQNLNDLMLLQLDREANLTSSVTILPLPL	LPLPLQNATVEAGTRCQVAGWGSQRSGGRL	R	E	A	T	R	C	25	0	2594.39	A0A087WXP0;Q86SR2;P20160	A0A087WXP0	62	86	AZU1	Azurocidin	yes	no	2;3	3.3037e-181	258.82	160630000	0	75511000	0	0	0	0	0	569710000	134	319	1709;1710;1711;1712;1713;1714;1715	2514;2515;2516;2517;2518;2519;2520	2516	260;261		7	160630000	0	80963000	0	0	0	0	0	61828000
292	EANQTQLR	RLREEHIRVYAIGIKEANQTQLREIAGEEK	VYAIGIKEANQTQLREIAGEEKRVYYVHDF	K	E	A	L	R	E	8	0	958.483	A6NMZ7	A6NMZ7	574	581	COL6A6	Collagen alpha-6(VI) chain	yes	yes	2	0.0097516	113.5	0	0	0	0	0	0	0	24373000	0	289	320	1716	2521	2521	542		1	0	0	0	0	0	0	0	1904800	0
293	EAQNTTEVYVK	______________________________	______________________________	M	E	A	V	K	W	11	0	1280.62	A0A2R8Y484	A0A2R8Y484	2	12			yes	yes	2	0.0052323	93.111	0	0	0	0	0	0	0	109390000	0	234	321	1717;1718;1719	2522;2523;2524	2524	429		3	0	0	0	0	0	0	0	8549300	0
294	EASIVGENETYPR	YEVAQSNAAFILDQREASIVGENETYPRAL	QREASIVGENETYPRALLHWNRAASQGYTV	R	E	A	P	R	A	13	0	1463.69	Q9UBV2	Q9UBV2	601	613	SEL1L	Protein sel-1 homolog 1	yes	yes	2	7.1342e-09	176.65	0	0	0	56630000	0	0	215990000	526740000	213100000	666	322	1720;1721;1722;1723	2525;2526;2527;2528;2529;2530	2526	1246		6	0	0	0	27603000	0	0	27904000	41166000	23127000
295	EASQNITYICK	NTAITQMTFLRLLSKEASQNITYICKNSVG	LLSKEASQNITYICKNSVGYMDDQAKNLKK	K	E	A	C	K	N	11	0	1325.63	B4DTC0;D3DPH5;A0A087WYX9;Q5PR22;P05997	B4DTC0	259	269	COL5A2	Collagen alpha-2(V) chain	yes	no	2	3.1161e-08	192.64	0	0	8046700	227670000	64626000	94806000	389390000	803180000	350830000	136	323	1724;1725;1726;1727;1728;1729;1730	2531;2532;2533;2534;2535;2536;2537;2538	2533	263		8	0	0	8627700	110970000	78767000	81587000	50305000	62771000	38074000
298	ECYYNLNDASLCDNVLAPNVTK	TDLDVDVDQPKEEKKECYYNLNDASLCDNV	DASLCDNVLAPNVTKQECCCTSGVGWGDNC	K	E	C	T	K	Q	22	0	2572.16	Q14766;C9JD84;E7EV71;B7ZLY3;H7C0I7;B4DRF7;B4DZD1;B4DNR7;B4DST8	Q14766	1348	1369	LTBP1	Latent-transforming growth factor beta-binding protein 1	yes	no	2	1.8979e-44	169.92	0	0	0	12467000	0	0	0	0	0	582	326	1736	2546	2546	1094		0	0	0	0	6076600	0	0	0	0	0
299	EDAAVNCTDISVQK	DCPARRWGHSECGHKEDAAVNCTDISVQKT	KEDAAVNCTDISVQKTPQKATTGRSSRQSS	K	E	D	Q	K	T	14	0	1548.71	F5GZZ9;C9JHR8;Q86VB7;H0YGZ7;H0YFM0	F5GZZ9	1010	1023	CD163	Scavenger receptor cysteine-rich type 1 protein M130;Soluble CD163	yes	no	2	2.8643e-09	142.97	0	0	0	23486000	0	0	0	0	0	446	327	1737;1738	2547;2548;2549	2547	789		3	0	0	0	11448000	0	0	0	0	0
300	EDALNETR	RKTLLSNLEEAKKKKEDALNETRESETKLK	EEAKKKKEDALNETRESETKLKELPGVCNE	K	E	D	T	R	E	8	0	946.436	A0A384NKS6;P10909;E7ETB4;E7ERK6;H0YLK8;E5RJZ5;E5RGB0;E5RH61	A0A384NKS6	134	141	CLU	Clusterin;Clusterin beta chain;Clusterin alpha chain	yes	no	1;2	6.0821e-133	267.84	18122000000	100410000000	70388000000	20213000000	1368400000	1751000000	137220000000	126050000000	112140000000	250	328	1739;1740;1741;1742;1743;1744;1745;1746;1747;1748;1749;1750;1751;1752;1753;1754;1755;1756;1757;1758;1759;1760;1761;1762;1763;1764;1765;1766;1767;1768;1769;1770;1771;1772;1773;1774;1775;1776;1777;1778;1779	2550;2551;2552;2553;2554;2555;2556;2557;2558;2559;2560;2561;2562;2563;2564;2565;2566;2567;2568;2569;2570;2571;2572;2573;2574;2575;2576;2577;2578;2579;2580;2581;2582;2583;2584;2585;2586;2587;2588;2589;2590;2591;2592;2593;2594;2595;2596;2597;2598;2599;2600;2601;2602;2603;2604;2605;2606;2607;2608;2609;2610;2611;2612;2613;2614;2615;2616;2617;2618;2619;2620;2621;2622;2623;2624	2583	470		64	18122000000	84831000000	75471000000	9852300000	1667900000	1506900000	17727000000	9850800000	12171000000
301	EDALNETRESETK	RKTLLSNLEEAKKKKEDALNETRESETKLK	KKEDALNETRESETKLKELPGVCNETMMAL	K	E	D	T	K	L	13	1	1520.7	A0A384NKS6;P10909;E7ETB4;E7ERK6;H0YLK8;E5RJZ5;E5RGB0;E5RH61	A0A384NKS6	134	146	CLU	Clusterin;Clusterin beta chain;Clusterin alpha chain	yes	no	2;3	0	356.68	41221000	4240000000	4399700000	89744000	0	0	2199700000	1139100000	5682400000	250	329	1780;1781;1782;1783;1784;1785;1786;1787;1788;1789;1790;1791;1792;1793;1794;1795;1796;1797;1798;1799;1800;1801;1802;1803;1804;1805;1806;1807;1808;1809;1810;1811;1812;1813;1814;1815;1816;1817;1818;1819	2625;2626;2627;2628;2629;2630;2631;2632;2633;2634;2635;2636;2637;2638;2639;2640;2641;2642;2643;2644;2645;2646;2647;2648;2649;2650;2651;2652;2653;2654;2655;2656;2657;2658;2659;2660;2661;2662;2663;2664;2665;2666;2667	2633	470		36	41221000	3582000000	4717400000	43744000	0	0	284180000	89023000	616690000
302	EDALNETRESETKLK	RKTLLSNLEEAKKKKEDALNETRESETKLK	EDALNETRESETKLKELPGVCNETMMALWE	K	E	D	L	K	E	15	2	1761.87	A0A384NKS6;P10909;E7ETB4;E7ERK6;H0YLK8;E5RJZ5;E5RGB0;E5RH61	A0A384NKS6	134	148	CLU	Clusterin;Clusterin beta chain;Clusterin alpha chain	yes	no	3	2.7806e-05	130.06	0	85149000	60344000	0	0	0	0	0	0	250	330	1820;1821;1822	2668;2669;2670;2671;2672	2671	470		4	0	71935000	64701000	0	0	0	0	0	0
303	EDGGGWWYNR	NDGWLTSDPRKQCSKEDGGGWWYNRCHAAN	KQCSKEDGGGWWYNRCHAANPNGRYYWGGQ	K	E	D	N	R	C	10	0	1238.51	D3DP13;B4E1D3;V9HVY1;P02675;D6REL8;CON__P02676	D3DP13	280	289	FGB;HEL-S-78p	Fibrinogen beta chain;Fibrinopeptide B;Fibrinogen beta chain	yes	no	2	0.00085336	159.04	0	0	0	50228000	0	0	0	0	0	404	331;332	1823;1824	2673;2674	2674	725		2	0	0	0	24483000	0	0	0	0	0
307	EEAMLYHNQTAELR	HRARWGLEEEDFQPREEAMLYHNQTAELRE	REEAMLYHNQTAELRELLEFTHMYLQSDDE	R	E	E	L	R	E	14	0	1703.79	Q92791;B4DVZ5;K7ERA3	Q92791	354	367	LEPREL4;P3H4	Synaptonemal complex protein SC65	yes	no	2;3	1.8293e-17	203.39	0	0	0	22129000	9198500	18225000	411520000	1053800000	0	396	336	1828;1829;1830;1831;1832;1833;1834	2678;2679;2680;2681;2682;2683;2684;2685	2678	715		8	0	0	0	10786000	11211000	15684000	53165000	82358000	0
308	EEEAIQLDGLNASQIR	KSREGSRTDDEVVQREEEAIQLDGLNASQI	EEAIQLDGLNASQIRELREKSEKFAFQAEV	R	E	E	I	R	E	16	0	1784.89	Q59FC6;Q5CAQ5;V9HWP2;P14625;Q96GW1;A0A1W2PRR1;B4DQX3	Q59FC6	78	93	TRA1;HEL-S-125m;HSP90B1	Endoplasmin	yes	no	2;3	5.6021e-157	291.57	37754000	81422000	66757000	269840000	0	0	1148000000	1561800000	884330000	547	337	1835;1836;1837;1838;1839;1840;1841;1842;1843;1844;1845;1846	2686;2687;2688;2689;2690;2691;2692;2693;2694;2695;2696;2697	2694	986		11	37754000	68786000	71577000	131530000	0	0	148310000	122050000	95973000
311	EEQYNSTFR	YVDGVEVHNAKTKPREEQYNSTFRVVSVLT	AKTKPREEQYNSTFRVVSVLTVLHQDWLNG	R	E	E	F	R	V	9	0	1172.51	Q86TT2;A0A286YES1;Q6N030;Q5EBM2;P01860	Q86TT2	200	208	DKFZp686I15212;IGHG3	Ig gamma-3 chain C region	yes	no	2	2.2794e-20	224.51	64672000	52412000	131910000	830910000	57177000	102050000	477310000	19360000000	7859700000	223	340	1884;1885;1886;1887;1888;1889;1890;1891;1892	2761;2762;2763;2764;2765;2766;2767;2768;2769;2770;2771;2772	2771	418		12	64672000	44278000	141440000	405010000	69687000	87824000	61664000	1513000000	852990000
312	EEQYNSTYR	YVDGVEVHNAKTKPREEQYNSTYRVVSVLT	AKTKPREEQYNSTYRVVSVLTVLHQDWLNG	R	E	E	Y	R	V	9	0	1188.5	P01857;Q6N096;Q6N097;Q6N094;Q5EFE5;Q6MZQ6;Q6N095;Q6MZV7;A8K008;Q6N089;V9HW68;S6B291;Q6GMX6;P0DOX5;A0A0A0MS08;Q6PYX1;Q7Z351	P01857	176	184	IGHG1;DKFZp686I15196;DKFZp686H20196;DKFZp686O01196;DKFZp686G11190;DKFZp686K03196;DKFZp686C11235;DKFZp686P15220;HEL-214;IGH@;DKFZp686N02209	Ig gamma-1 chain C region	yes	no	1;2	6.046e-261	312.99	777940000	3928200000	1652200000	12309000000	878400000	1540800000	32258000000	68370000000	48767000000	150	341	1893;1894;1895;1896;1897;1898;1899;1900;1901;1902;1903;1904;1905;1906;1907;1908;1909;1910;1911;1912;1913;1914;1915;1916	2773;2774;2775;2776;2777;2778;2779;2780;2781;2782;2783;2784;2785;2786;2787;2788;2789;2790;2791;2792;2793;2794;2795;2796;2797;2798;2799;2800;2801;2802;2803;2804;2805;2806;2807;2808;2809	2784	305		32	777940000	3318600000	1771500000	5999800000	1070600000	1326000000	4167400000	5343200000	5292500000
313	EERPLNASALK	LSYNDIYCRFAECCREERPLNASALKLDLE	ECCREERPLNASALKLDLEEKLFGQHLATE	R	E	E	L	K	L	11	0	1226.66	H0Y7C8;O14657	H0Y7C8	41	51	TOR1B	Torsin-1B	yes	no	2	0.010417	82.417	0	0	0	2866600	0	0	0	0	0	490	342	1917	2810	2810	868		1	0	0	0	1397300	0	0	0	0	0
317	EETLLYDSNTSSMADR	FEAGAMENWGLLTFREETLLYDSNTSSMAD	ETLLYDSNTSSMADRKLVTKIIAHELAHQW	R	E	E	D	R	K	16	0	1830.79	B2RAK1;Q9UIQ6	B2RAK1	440	455	LNPEP	Leucyl-cystinyl aminopeptidase;Leucyl-cystinyl aminopeptidase, pregnancy serum form	yes	no	2	1.0282e-72	251.03	0	0	0	24790000	0	0	71442000	227060000	118110000	330	346	1926;1927;1928;1929	2819;2820;2821;2822;2823	2823	606		5	0	0	0	12084000	0	0	9229600	17745000	12818000
321	EFYVDQNVSIK	PVPFVIPENALLSEKEFYVDQNVSIKCREG	LSEKEFYVDQNVSIKCREGFLLQGHGIITY	K	E	F	I	K	C	11	0	1340.66	Q5JB40;A0A0A0MSD0;Q4LDE5;B3KQM1	Q5JB40	3376	3386	SVEP1	Sushi, von Willebrand factor type A, EGF and pentraxin domain-containing protein 1	yes	no	2	3.0802e-05	145.72	0	0	0	23165000	0	0	0	0	0	154	350	1939	2835	2835	310		1	0	0	0	11291000	0	0	0	0	0
323	EGEHDLVQGSGQQPQAGLSQANFTLGPVSR	QCRSDVGYDIFVLYKEGEHDLVQGSGQQPQ	AGLSQANFTLGPVSRSHGGQYRCYGAHNLS	K	E	G	S	R	S	30	0	3106.51	Q8NF80;A0A0G2JNY7;A0A0G2JMX5;A0A0G2JPM8;A0A0G2JNP3;O75023	Q8NF80	149	178	FLJ00275;LILRB5	Leukocyte immunoglobulin-like receptor subfamily B member 5	yes	no	3	1.5414e-13	116.72	0	0	0	9568400	0	0	0	0	0	173	352	1946	2844;2845	2844	341		2	0	0	0	4663900	0	0	0	0	0
325	EGHFYYNISEVK	EQELETITIPDLRGKEGHFYYNISEVKVTE	RGKEGHFYYNISEVKVTELQLTSSELDFQP	K	E	G	V	K	V	12	0	1484.69	Q53H91;B3KUE5;P55058	Q53H91	58	69	PLTP	Phospholipid transfer protein	yes	no	2;3	7.6002e-120	286.4	10849000	54333000	9994400	58727000	25056000	51425000	683260000	432890000	274920000	355	354	1950;1951;1952;1953;1954;1955;1956;1957;1958;1959;1960;1961	2849;2850;2851;2852;2853;2854;2855;2856;2857;2858;2859;2860;2861;2862;2863	2860	643		14	10849000	45901000	10716000	28625000	30538000	44254000	88271000	33831000	29836000
326	EGLWSHVDQLNR	AAGLDSLPTEPLRPREGLWSHVDQLNRTLA	RPREGLWSHVDQLNRTLAQHTQDIARLRDD	R	E	G	N	R	T	12	0	1452.71	Q9NT22	Q9NT22	722	733	EMILIN3	EMILIN-3	yes	yes	2;3	1.2297e-119	284.62	48718000	97657000	133700000	3346200	0	0	294900000	249660000	0	663	355	1962;1963;1964;1965;1966;1967;1968;1969;1970;1971;1972;1973;1974;1975;1976;1977	2864;2865;2866;2867;2868;2869;2870;2871;2872;2873;2874;2875;2876;2877;2878;2879;2880;2881	2879	1237		17	48718000	82501000	143350000	1631000	0	0	38099000	19512000	0
328	EGYSNISYIVVNHQGISSR	LQASKLEDLRVKLKKEGYSNISYIVVNHQG	NISYIVVNHQGISSRLKYTHLKNKVSEHIP	K	E	G	S	R	L	19	0	2122.04	A0A182DWH8;A0A182DWH7;P49908	A0A182DWH8	79	97	SEPP1	Selenoprotein P	yes	no	3	6.5672e-29	166.57	0	0	0	34882000	0	0	96552000	96525000	69157000	205	357	1979;1980;1981;1982	2883;2884;2885;2886;2887;2888;2889	2885	385		6	0	0	0	17002000	0	0	12474000	7543600	7505400
329	EHEAQSNASLDVFLGHTNVEELMK	GDRWILTAAHTLYPKEHEAQSNASLDVFLG	LDVFLGHTNVEELMKLGNHPIRRVSVHPDY	K	E	H	M	K	L	24	0	2697.27	B4E1B0;F5H2D0;Q53HU9;Q53HT9;A8K5J8;A0A3B3ISR2;B4DPQ0;P00736;A0A3B3ITU4	B4E1B0	402	425	C1R	Complement C1r subcomponent;Complement C1r subcomponent heavy chain;Complement C1r subcomponent light chain	yes	no	3;4	0	359.54	0	0	0	0	0	0	0	523790000	106920000	258	358	1983;1984;1985	2890;2891;2892	2890	492		2	0	0	0	0	0	0	0	40935000	11604000
330	EHVHNASAHLTFNK	LHRGAPYRDPLRIPREHVHNASAHLTFNKF	REHVHNASAHLTFNKFWRRYGKLSRHLMKV	R	E	H	N	K	F	14	0	1603.79	Q53FU0;Q53FS1;A0A024R860;Q9NRB3;C9J991	Q53FU0	205	218	CHST12	Carbohydrate sulfotransferase 12	yes	no	3	0.00016918	118.52	7192800	0	8484300	0	0	0	0	0	0	66	359	1986;1987	2893;2894	2894	111		2	7192800	0	9096900	0	0	0	0	0	0
331	EIANATAKPEDR	NQLALEMNKVMELEKEIANATAKPEDRNDP	LEKEIANATAKPEDRNDPMLLYNKMTLAQI	K	E	I	D	R	N	12	0	1313.66	B7ZKY6;P08473	B7ZKY6	282	293	MME	Neprilysin	yes	no	2;3	0.0018977	136.53	0	0	0	13886000	0	0	6035600	62752000	0	435	360	1988;1989;1990;1991	2895;2896;2897;2898	2896	775		3	0	0	0	6768700	0	0	779740	4904200	0
332	EIFVANGTQGK	LLTAGVSALEVYTPKEIFVANGTQGKLTCK	YTPKEIFVANGTQGKLTCKFKSTSTTGGLT	K	E	I	G	K	L	11	0	1162.6	F8WFC4;Q9UEL6;A0A024R8Y3;Q9UEL4;Q5U0H8;A8K5D4;O95297	F8WFC4	45	55	MPZL1	Myelin protein zero-like protein 1	yes	no	2	2.687e-12	200.6	0	14823000	0	61403000	62517000	71787000	435530000	568360000	284780000	73	361	1992;1993;1994;1995;1996;1997;1998	2899;2900;2901;2902;2903;2904;2905	2904	126		7	0	12523000	0	29930000	76196000	61778000	56267000	44418000	30907000
335	EIPANGTDIVYDMK	VLSAKVTLHREFPAKEIPANGTDIVYDMKR	KEIPANGTDIVYDMKRGFVYLQPHSEHQGV	K	E	I	M	K	R	14	0	1564.74	Q15198	Q15198	215	228	PDGFRL	Platelet-derived growth factor receptor-like protein	yes	yes	2	1.0523e-05	132.47	29449000	80350000	60589000	100090000	0	0	692550000	749510000	790240000	584	364	2002;2003;2004;2005;2006;2007;2008;2009;2010	2910;2911;2912;2913;2914;2915;2916;2917;2918;2919;2920;2921;2922;2923;2924	2920	1098		15	29449000	67881000	64964000	48787000	0	0	89471000	58576000	85762000
336	EIRHNSTGCLR	TEFIREGDDDRTVCREIRHNSTGCLRMKDQ	TVCREIRHNSTGCLRMKDQCDKCREILSVD	R	E	I	L	R	M	11	1	1341.66	A0A384NKS6;P10909;E7ETB4;B4DW11;H0YC35;CON__P17697	A0A384NKS6	339	349	CLU	Clusterin;Clusterin beta chain;Clusterin alpha chain;Clusterin	yes	no	2;3	3.1516e-05	174.23	106170000	157150000	36615000	0	0	0	74580000	58792000	66477000	250	365	2011;2012;2013;2014;2015;2016;2017;2018	2925;2926;2927;2928;2929;2930;2931;2932	2925	471		6	106170000	132760000	39258000	0	0	0	9635100	4594700	7214500
341	ELDLTCNITTDR	LRAAVPKNVSVAEGKELDLTCNITTDRADD	EGKELDLTCNITTDRADDVRPEVTWSFSRM	K	E	L	D	R	A	12	0	1449.68	A4QPA1;Q1WWL2;Q4QQP8;Q9P2B2	A4QPA1	68	79	PTGFRN	Prostaglandin F2 receptor negative regulator	yes	no	2	1.019e-30	164.33	0	0	0	0	0	0	0	0	0	279	370	2034	2953	2953	520		1	0	0	0	0	0	0	0	0	0
342	ELFYGHGDHLIDQGLDVGNLTQQR	RNLVRVAEVWLDEYKELFYGHGDHLIDQGL	LIDQGLDVGNLTQQRELRKKLKCKSFKWYL	K	E	L	Q	R	E	24	0	2724.33	Q7Z7M9	Q7Z7M9	758	781	GALNT5	Polypeptide N-acetylgalactosaminyltransferase 5	yes	yes	4	1.9295e-20	139.95	0	0	0	13155000	0	0	0	117300000	0	625	371	2035;2036	2954;2955;2956;2957	2957	1173		4	0	0	0	6412100	0	0	0	9167600	0
343	ELHHLQEQNVSNAFLDK	VEVEWDYSPQREWEKELHHLQEQNVSNAFL	HHLQEQNVSNAFLDKGEFYIGSKYKKVVYR	K	E	L	D	K	G	17	0	2021	B3KTA8;H7C5R1;E9PFZ2;B7Z5Q2;Q1L857;A8K5A4;A5PL27;P00450	B3KTA8	467	483	CP	Ceruloplasmin	yes	no	3;4	2.0759e-94	229.02	67710000	201550000	61991000	489730000	0	386480000	461090000	761910000	1191700000	282	372	2037;2038;2039;2040;2041;2042;2043;2044;2045;2046;2047;2048;2049;2050	2958;2959;2960;2961;2962;2963;2964;2965;2966;2967;2968;2969;2970;2971;2972;2973;2974	2959	526		16	67710000	170270000	66467000	238710000	0	332590000	59568000	59545000	129330000
346	ELLETVVNR	KLKMSRWSLVRGRMKELLETVVNRTRDGWQ	VRGRMKELLETVVNRTRDGWQWFW______	K	E	L	N	R	T	9	0	1071.59	K7EMC3;A5YAK2;K7ER74;P55056	K7EMC3	56	64	APOC4;APOC4-APOC2	Apolipoprotein C-IV	yes	no	2	0.019282	93.429	0	0	0	5620500	0	0	0	0	0	284	375	2065	2991	2991	529		1	0	0	0	2739600	0	0	0	0	0
347	ELLNLNR	HTADTTHPRLRLSHKELLNLNRTSIFHSPF	PRLRLSHKELLNLNRTSIFHSPFGFLDLHT	K	E	L	N	R	T	7	0	870.492	A0A2R8YCX5;B4DLY1;O15041	A0A2R8YCX5	39	45	SEMA3E	Semaphorin-3E	yes	no	2	0.017316	116	0	0	0	0	0	0	0	0	0	237	376	2066;2067	2992;2993	2992	431		2	0	0	0	0	0	0	0	0	0
348	ELPGVCNETMMALWEECKPCLK	EDALNETRESETKLKELPGVCNETMMALWE	ETMMALWEECKPCLKQTCMKFYARVCRSGS	K	E	L	L	K	Q	22	0	2694.2	A0A384NKS6;P10909;E7ETB4;E7ERK6;H0YLK8;E5RJZ5;E5RGB0;E5RH61	A0A384NKS6	149	170	CLU	Clusterin;Clusterin beta chain;Clusterin alpha chain	yes	no	2;3	4.7156e-150	276.34	12074000000	13637000000	12973000000	1774600000	0	16072000	48445000000	45470000000	63878000000	250	377;378;379;380	2068;2069;2070;2071;2072;2073;2074;2075;2076;2077;2078;2079;2080;2081;2082;2083;2084;2085;2086;2087;2088;2089;2090;2091;2092;2093;2094;2095;2096;2097;2098;2099;2100;2101;2102;2103;2104;2105;2106;2107;2108;2109;2110;2111;2112;2113;2114;2115;2116;2117;2118;2119;2120;2121;2122;2123;2124;2125;2126;2127;2128;2129;2130;2131;2132;2133;2134;2135;2136;2137;2138;2139;2140	2994;2995;2996;2997;2998;2999;3000;3001;3002;3003;3004;3005;3006;3007;3008;3009;3010;3011;3012;3013;3014;3015;3016;3017;3018;3019;3020;3021;3022;3023;3024;3025;3026;3027;3028;3029;3030;3031;3032;3033;3034;3035;3036;3037;3038;3039;3040;3041;3042;3043;3044;3045;3046;3047;3048;3049;3050;3051;3052;3053;3054;3055;3056;3057;3058;3059;3060;3061;3062;3063;3064;3065;3066;3067;3068;3069;3070;3071;3072;3073…	3095	472	54;55	126	12074000000	11521000000	13910000000	865010000	0	13831000	6258600000	3553500000	6932400000
350	ELQGNCSR	VQDCMDGSDEGPHCRELQGNCSRLGCQHHC	DEGPHCRELQGNCSRLGCQHHCVPTLDGPT	R	E	L	S	R	L	8	0	962.424	Q07954;Q6PJ72;Q7Z7K9	Q07954	110	117	LRP1	Prolow-density lipoprotein receptor-related protein 1;Low-density lipoprotein receptor-related protein 1 85 kDa subunit;Low-density lipoprotein receptor-related protein 1 515 kDa subunit;Low-density lipoprotein receptor-related protein 1 intracellular domain	yes	no	2	0.0033408	164.53	55029000	26711000	0	171120000	146780000	85365000	235710000	503230000	0	575	382	2143;2144;2145;2146;2147;2148;2149	3124;3125;3126;3127;3128;3129;3130;3131	3126	1062		8	55029000	22566000	0	83407000	178900000	73463000	30451000	39328000	0
351	ELQQFNYTWLR	IENTTVILEDCDGSKELQQFNYTWLRLIKC	DGSKELQQFNYTWLRLIKCGEWCIAPIPDK	K	E	L	L	R	L	11	0	1496.74	Q7Z7M9;Q68VJ5	Q7Z7M9	840	850	GALNT5	Polypeptide N-acetylgalactosaminyltransferase 5	yes	no	2	8.1343e-41	175.73	0	0	0	21692000	0	0	0	0	0	625	383	2150;2151	3132;3133;3134	3134	1174		3	0	0	0	10573000	0	0	0	0	0
353	ELYNGTADITLR	ALWRISPPSRAQMKRELYNGTADITLRFTW	MKRELYNGTADITLRFTWNFQRDLAKGGTV	R	E	L	L	R	F	12	0	1364.69	Q96HU3;E7EUT2;M4QHP2;Q92508	Q96HU3	159	170	FAM38A;PIEZO1	Piezo-type mechanosensitive ion channel component;Piezo-type mechanosensitive ion channel component 1	yes	no	2	0.0007004	120.09	0	0	0	0	0	0	0	90309000	0	472	385	2153	3136	3136	843		1	0	0	0	0	0	0	0	7057800	0
355	ENATVPENEEEIIR	VVVTAIINHPLLFPRENATVPENEEEIIRK	RENATVPENEEEIIRKMQAHQEKLQLEQLR	R	E	N	I	R	K	14	0	1641.78	X6RK76;Q8IWB1	X6RK76	26	39	ITPRIP	Inositol 1,4,5-trisphosphate receptor-interacting protein	yes	no	2	0.0004719	116.77	0	0	0	3990700	0	0	0	0	0	632	387	2156	3139	3139	1182		1	0	0	0	1945200	0	0	0	0	0
356	ENGMPMDIVNTSGR	KSVGYPHPDWIWRKKENGMPMDIVNTSGRF	KENGMPMDIVNTSGRFFIINKENYTELNIV	K	E	N	G	R	F	14	0	1519.68	Q9UFM8;Q9Y639;Q9Y499;H3BU51;B7Z960	Q9UFM8	238	251	DKFZp566H1924;NPTN	Neuroplastin	yes	no	2	0.002335	97.911	0	0	0	0	0	0	0	0	0	667	388	2157	3140	3140	1250		1	0	0	0	0	0	0	0	0	0
357	ENGSFSGK	KPLNDTVTEYEVISRENGSFSGKNKSIQMT	EYEVISRENGSFSGKNKSIQMTNQTFSTVE	R	E	N	G	K	N	8	0	824.366	A0A1S5UZ16;D3YTG3;Q7Z7G0;B4DSV9;H0Y897	A0A1S5UZ16	902	909	ABI3BP	Target of Nesh-SH3	yes	no	2	0.021059	95.531	162490000	141350000	43586000	673210000	443580000	322040000	562500000	0	351960000	214	389	2158;2159;2160;2161;2162;2163;2164;2165;2166	3141;3142;3143;3144;3145;3146;3147;3148;3149	3145	399		9	162490000	119410000	46733000	328140000	540640000	277140000	72671000	0	38197000
358	ENGTDTVQEEEESPAEGSK	TISSLFGGGTTPDAKENGTDTVQEEEESPA	DTVQEEEESPAEGSKDEPGEQVELKEEAEA	K	E	N	S	K	D	19	0	2034.85	B7Z766;B3KXH0;A0A384P5T6;Q9Y4L1;B7Z602;E9PJ21;Q05D91;A0A087WWI4;Q6IN67;K7EQK2	B7Z766	444	462	HYOU1	Hypoxia up-regulated protein 1	yes	no	2	0	347.76	0	8119600	6104700	12154000	0	0	65303000	186420000	90194000	252	390	2167;2168;2169;2170;2171;2172	3150;3151;3152;3153;3154;3155	3154	480		6	0	6859500	6545400	5924300	0	0	8436500	14569000	9788400
360	ENISDPTSPLR	IVERNIRIIVPLNNRENISDPTSPLRTRFV	LNNRENISDPTSPLRTRFVYHLSDLCKKCD	R	E	N	L	R	T	11	0	1227.61	D6RD17;D6RHJ6;P01591	D6RD17	79	89	JCHAIN;IGJ	Immunoglobulin J chain	yes	no	2	1.0757e-05	180.67	0	0	0	144570000	0	0	238490000	395920000	444410000	463	392	2174;2175;2176;2177;2178	3157;3158;3159;3160;3161;3162;3163	3160	816		7	0	0	0	70469000	0	0	30810000	30942000	48230000
361	ENLSAVMLYNPGLEFERQQR	LSSFSLSMTDLSKSRENLSAVMLYNPGLEF	VMLYNPGLEFERQQREELEKLESKRKLIEE	R	E	N	Q	R	E	20	1	2393.18	A0A1B0GTU3;A0A140VK74;Q96L93	A0A1B0GTU3	584	603	KIF16B	Kinesin-like protein KIF16B	yes	no	2	0.017417	69.451	0	0	0	0	0	0	327960000	0	0	200	393	2179	3164	3164	378	37	1	0	0	0	0	0	0	42369000	0	0
362	ENLTAPGSDSAVFFEQGTTR	IIWNYAPSGIDIFTKENLTAPGSDSAVFFE	PGSDSAVFFEQGTTRIGGSYKKLVYREYTD	K	E	N	T	R	I	20	0	2125.99	B3KTA8;H7C5R1;E9PFZ2;B7Z5Q2;Q1L857;A8K5A4;A5PL27;P00450	B3KTA8	109	128	CP	Ceruloplasmin	yes	no	2	3.2754e-225	309.29	76241000	192820000	100380000	479590000	16171000	58819000	1077200000	0	0	282	394	2180;2181;2182;2183;2184;2185;2186;2187	3165;3166;3167;3168;3169;3170;3171;3172;3173;3174;3175;3176;3177;3178	3177	527		14	76241000	162900000	107630000	233770000	19709000	50618000	139160000	0	0
363	ENNNITMR	IKDEDENKFVSRLMRENNNITMRVWLGLSQ	FVSRLMRENNNITMRVWLGLSQHSVDQSWS	R	E	N	M	R	V	8	0	990.455	Q59H44;O60449	Q59H44	1208	1215	LY75	Lymphocyte antigen 75	yes	no	2	0.020795	96.253	0	0	0	3224200	0	0	0	0	0	511	395	2188;2189	3179;3180	3179	902		2	0	0	0	1571600	0	0	0	0	0
364	ENPVEFDSLFNESK	AGFYEDVSAVAKGWKENPVEFDSLFNESKY	KENPVEFDSLFNESKYTWSWGS________	K	E	N	S	K	Y	14	0	1653.75	K7EQG0;K7EID9;A0A1W2PS19;A0A024R2C3;B2RCI8;A0A1W2PNH8;A0A1W2PNR0;A0A1W2PQP4;A0A1W2PQR8;A0A1W2PNQ8;A0A1W2PQZ1;A0A1W2PPR7;A0A1W2PPB6;A0A1W2PNW5;K7ELE1;K7EMD7;K7EPJ2;A0A1W2PRH3;K7EL34;K7ESH9;A0A1W2PQ49;A0A1W2PQA9;O95427	K7EQG0	118	131	PIGN	GPI ethanolamine phosphate transferase 1	yes	no	2	1.4228e-05	122.55	0	0	0	0	0	0	0	0	0	28	396	2190	3181	3181	37		1	0	0	0	0	0	0	0	0	0
365	ENQNHSYSLK	LYVKSLLWTETFMNKENQNHSYSLKSSASF	TFMNKENQNHSYSLKSSASFNVIEFPYKNL	K	E	N	L	K	S	10	0	1218.56	L7RXH0;A5YM53;P06756;H7BZG1	L7RXH0	942	951	ITGAV	Integrin alpha-V;Integrin alpha-V heavy chain;Integrin alpha-V light chain	yes	no	2;3	4.4175e-10	203.02	0	0	0	20676000	0	0	45600000	132310000	61556000	285	397	2191;2192;2193;2194	3182;3183;3184;3185;3186;3187	3182	531		6	0	0	0	10078000	0	0	5891100	10340000	6680500
366	ENTSDPSLVIAFGR	PSDATVVLNRSSCGKENTSDPSLVIAFGRG	KENTSDPSLVIAFGRGHTLTLNFTRNATRY	K	E	N	G	R	G	14	0	1504.75	B3KRY3;A0A024RDY3;P11279;Q59FZ0	B3KRY3	61	74	LAMP1	Lysosome-associated membrane glycoprotein 1	yes	no	2	3.0936e-31	218.06	24224000	0	21408000	138230000	0	53308000	591510000	1237500000	520080000	106	398	2195;2196;2197;2198;2199;2200;2201;2202;2203	3188;3189;3190;3191;3192;3193;3194;3195;3196;3197;3198;3199;3200;3201;3202;3203	3192	230		16	24224000	0	22954000	67378000	0	45875000	76418000	96713000	56442000
367	ENVGIYNLSK	SHAITLEFYQDGNGRENVGIYNLSKGVNRF	DGNGRENVGIYNLSKGVNRFCLSKPGVYKV	R	E	N	S	K	G	10	0	1135.59	A0A0G2JP90;A0A087WW46;J3KN36;A0A0G2JN29;A0A087X117;Q15155;P69849;Q5JPE7;Q1LZN2	A0A0G2JP90	445	454	NOMO1;NOMO3;NOMO2	Nodal modulator 1;Nodal modulator 3;Nodal modulator 2	yes	no	2	0.011986	95.523	0	0	0	10918000	0	0	0	0	0	132	399	2204	3204	3204	254		1	0	0	0	5321800	0	0	0	0	0
368	ENVSMVDYAHNNYQAQSAVPLR	LYGNGPGYKVVGGERENVSMVDYAHNNYQA	YAHNNYQAQSAVPLRHETHGGEDVAVFSKG	R	E	N	L	R	H	22	0	2505.17	B7Z1D1;B2R6Q2;A0A024RAG0;P05186;Q9UIL5;B1ANL0	B7Z1D1	377	398	ALPL	Alkaline phosphatase;Alkaline phosphatase, tissue-nonspecific isozyme	yes	no	3	3.0917e-242	275.5	0	0	0	115910000	85471000	70721000	0	791250000	0	90	400;401;402	2205;2206;2207;2208;2209;2210;2211;2212;2213;2214	3205;3206;3207;3208;3209;3210;3211;3212;3213;3214;3215	3208	186;187	13	11	0	0	0	56497000	104170000	60860000	0	61838000	0
369	ENYAELLEDAFLKNVTAQICIDK	GLAPSQGRPGLSLVKENYAELLEDAFLKNV	DAFLKNVTAQICIDKKCPDYTCPITFSSPA	K	E	N	D	K	K	23	1	2696.34	A0A087X0S5;A0A384P5H7;P12109;Q8TBN2	A0A087X0S5	789	811	COL6A1	Collagen alpha-1(VI) chain	yes	no	2	2.5035e-05	79.837	0	0	0	0	0	0	0	0	0	141	403	2215	3216	3216	274		1	0	0	0	0	0	0	0	0	0
372	EPGSNVTMSVDAECVPMVR	TVILTANLEAQALWKEPGSNVTMSVDAECV	NVTMSVDAECVPMVRDLLRYFYSRRIDITL	K	E	P	V	R	D	19	0	2076.93	B4DVE1;A0A0S2Z3Y1;Q08380;K7ESM3;K7EKQ5;K7EP36;B4DWA8;B3KP88;B4DDG4;K7EJY8	B4DVE1	176	194	LGALS3BP	Galectin-3-binding protein	yes	no	2	2.722e-73	182.57	0	0	0	0	0	0	0	0	0	184	406	2224	3225	3225	356		1	0	0	0	0	0	0	0	0	0
373	EPLSDPVGTCYLSTDNFTR	SILACAPLYSWRTEKEPLSDPVGTCYLSTD	DPVGTCYLSTDNFTRILEYAPCRSDFSWAA	K	E	P	T	R	I	19	0	2170.98	B2R627;A8K6A5;A0A024RB01;P08648	B2R627	167	185	ITGA5	Integrin alpha-5;Integrin alpha-5 heavy chain;Integrin alpha-5 light chain	yes	no	2	1.5601e-200	302.73	0	0	0	0	0	0	0	502870000	0	95	407	2225	3226	3226	198		1	0	0	0	0	0	0	0	39301000	0
374	EQINITLDHR	DQLFYTKIFLDPEKREQINITLDHRCRIFQ	DPEKREQINITLDHRCRIFQNLDGALDEVV	R	E	Q	H	R	C	10	0	1237.64	B4DGN8;B2R5M9;A0A024R4H0;Q02809;Q5JXB7	B4DGN8	157	166	PLOD1	Procollagen-lysine,2-oxoglutarate 5-dioxygenase 1	yes	no	2;3	3.9525e-152	236.32	123780000	23528000	21294000	240120000	61848000	94261000	314970000	298670000	0	38	408	2226;2227;2228;2229;2230;2231;2232;2233;2234;2235;2236;2237;2238;2239;2240	3227;3228;3229;3230;3231;3232;3233;3234;3235;3236;3237;3238;3239;3240;3241;3242	3235	64		16	123780000	19877000	22831000	117040000	75381000	81118000	40691000	23342000	0
375	EQMEVVNMSLSTSADSLTTPR	AARQRDHEKQQERVREQMEVVNMSLSTSAD	NMSLSTSADSLTTPRLTLSELDDIIKNASG	R	E	Q	P	R	L	21	0	2295.07	B7Z938;Q5D044;H0UI49;A0A0A0MTC7;A0A0A0MQS9;Q16363	B7Z938	525	545	LAMA4	Laminin subunit alpha-4	yes	no	2	0	349.47	0	0	0	0	0	0	0	96348000	0	148	409	2241	3243	3243	298		1	0	0	0	0	0	0	0	7529800	0
376	EQQLESCACNETDNSCK	LGKCKDGKCIPFCEREQQLESCACNETDNS	QLESCACNETDNSCKVCCRDLSGRCVPYVD	R	E	Q	C	K	V	17	0	2071.79	Q53RS1;B2RNB2;P78536	Q53RS1	304	320	ADAM17	Disintegrin and metalloproteinase domain-containing protein 17	yes	no	2	3.2054e-24	145.71	0	0	0	0	0	0	0	0	0	336	410	2242	3244	3244	617		1	0	0	0	0	0	0	0	0	0
378	EQRPGQNCSNYTVR	VVHGSPREGFWCLNREQRPGQNCSNYTVRF	REQRPGQNCSNYTVRFLCPPGSLRRDTERI	R	E	Q	V	R	F	14	0	1707.77	O75339	O75339	123	136	CILP	Cartilage intermediate layer protein 1;Cartilage intermediate layer protein 1 C1;Cartilage intermediate layer protein 1 C2	yes	yes	2;3	2.1048e-110	274.45	8004100000	9136400000	20273000000	3091600000	1197400000	1951000000	36283000000	29076000000	50355000000	515	414	2250;2251;2252;2253;2254;2255;2256;2257;2258;2259;2260;2261;2262;2263;2264;2265;2266;2267;2268;2269;2270	3255;3256;3257;3258;3259;3260;3261;3262;3263;3264;3265;3266;3267;3268;3269;3270;3271;3272;3273;3274;3275;3276;3277;3278;3279;3280;3281;3282;3283	3278	910		28	8004100000	7718500000	21737000000	1506900000	1459400000	1678900000	4687400000	2272400000	5464800000
382	ESLNLWYDCTWNNDTK	FVATLDKSWWTLPGKESLNLWYDCTWNNDT	SLNLWYDCTWNNDTKTWACSNVSENGEG__	K	E	S	T	K	T	16	0	2057.88	M0R122;M0QZ66;Q6IBD3;A0A024QZF8;P54852	M0R122	35	50	EMP3	Epithelial membrane protein 3	yes	no	2	0	304.51	17492000	27069000	24996000	60144000	0	0	0	316700000	234940000	9	418	2277;2278;2279;2280;2281;2282;2283	3292;3293;3294;3295;3296;3297;3298;3299	3297	11;12		8	17492000	22868000	26801000	29316000	0	0	0	24751000	25497000
385	ESTVPQNQHITNGTLTGVLSLSELK	DSAFFRGEIMFQYDKESTVPQNQHITNGTL	TNGTLTGVLSLSELKRSELNKTLQTLSETY	K	E	S	L	K	R	25	0	2665.39	Q14CE1;A8K4P7;Q8IZP9;Q8NF77;Q499H0	Q14CE1	117	141	GPR64;FLJ00282	G-protein coupled receptor 64	yes	no	3	5.1837e-05	101.47	0	0	0	0	0	0	0	71474000	63725000	298	421	2289;2290	3305;3306;3307	3306	555		3	0	0	0	0	0	0	0	5585900	6915900
386	ESVPSSGPTNVSALATTSSSMLVR	IGSGPWSQTVVGRTRESVPSSGPTNVSALA	NVSALATTSSSMLVRWSEVPEADRNGLVLG	R	E	S	V	R	W	24	0	2377.18	Q58EX2;H7C2P2	Q58EX2	1196	1219	SDK2	Protein sidekick-2	yes	no	2	1.1986e-13	110.37	0	0	0	0	0	0	0	0	0	594	422	2291	3308	3308	1109		1	0	0	0	0	0	0	0	0	0
387	ESVTDHVNLITPLEKPLQNFTLCFR	FAHTDLSGKVFVFPRESVTDHVNLITPLEK	TPLEKPLQNFTLCFRAYSDLSRAYSLFSYN	R	E	S	F	R	A	25	0	2970.53	V9HWP0;P02743	V9HWP0	33	57	HEL-S-92n;APCS	Serum amyloid P-component;Serum amyloid P-component(1-203)	yes	no	4	8.7438e-90	226.56	380820000	217070000	119990000	0	0	128540000	0	0	0	524	423	2292;2293;2294;2295	3309;3310;3311;3312;3313	3311	936		5	380820000	183380000	128660000	0	0	110620000	0	0	0
388	ETASNCNGSLAHPSDLYAEGCEALVVK	FKETKNQSVPLSCCRETASNCNGSLAHPSD	PSDLYAEGCEALVVKKLQEIMMHVIWAALA	R	E	T	V	K	K	27	0	2891.31	H0YKJ9;B4DEK8;O60637	H0YKJ9	88	114	TSPAN3	Tetraspanin;Tetraspanin-3	yes	no	3	3.7477e-15	125.05	0	0	5037200	0	0	0	0	0	53630000	365	424	2296;2297	3314;3315	3315	660		2	0	0	5400900	0	0	0	0	0	5820300
390	ETFFNLSK	SQGSFAFIHKDFDVKETFFNLSKRYFDTEC	HKDFDVKETFFNLSKRYFDTECVPMNFRNA	K	E	T	S	K	R	8	0	984.492	B2RBZ5;A0A024R6I6;G3V2W1;Q9UK55	B2RBZ5	176	183	SERPINA10	Protein Z-dependent protease inhibitor	yes	no	2	0.0097516	113.5	0	0	0	9910600	0	0	39502000	85637000	38239000	50	426	2299;2300;2301;2302	3320;3321;3322;3323;3324	3324	82		5	0	0	0	4830700	0	0	5103300	6692700	4149900
391	ETLENNSFLITTVNK	QASGDALVDRQSQLKETLENNSFLITTVNK	ETLENNSFLITTVNKTLQAYNGYVTNLQQD	K	E	T	N	K	T	15	0	1721.88	Q5KU26	Q5KU26	155	169	COLEC12	Collectin-12	yes	yes	2	2.3136e-14	184.55	0	0	0	27683000	0	0	0	0	0	599	427	2303	3325	3325	1120;1121		1	0	0	0	13494000	0	0	0	0	0
392	ETNTTSQMQAALLEK	EGLSRHVAGLWAGLRETNTTSQMQAALLEK	ETNTTSQMQAALLEKLVGGQAGLGRRLGAL	R	E	T	E	K	L	15	0	1663.81	Q9Y6C2;A0A0A0MT20	Q9Y6C2	764	778	EMILIN1	EMILIN-1	yes	no	2	9.5467e-283	337.53	204390000	147360000	190640000	331370000	0	88105000	657730000	957670000	754430000	671	428;429	2304;2305;2306;2307;2308;2309;2310;2311;2312;2313;2314;2315;2316;2317;2318;2319	3326;3327;3328;3329;3330;3331;3332;3333;3334;3335;3336;3337;3338;3339;3340;3341;3342;3343;3344;3345;3346;3347;3348;3349;3350;3351	3340	1254	122	25	204390000	124490000	204400000	161520000	0	75821000	84973000	74844000	81875000
396	EVNDTLLVNELK	TNILKTTQGSKIFLKEVNDTLLVNELKSKE	FLKEVNDTLLVNELKSKESDIMTTNGVIHV	K	E	V	L	K	S	12	0	1385.74	B4E3A7;B7Z4V4;A0A024RDT5;C0IMJ3;B1ALD9;A0A024RDS2;Q15063	B4E3A7	54	65	POSTN	Periostin	yes	no	1;2	1.0551e-58	244.06	0	0	0	955020000	9748300	83091000	2588900000	2176600000	1191500000	104	434	2350;2351;2352;2353;2354;2355;2356;2357;2358	3387;3388;3389;3390;3391;3392;3393;3394;3395;3396;3397;3398;3399;3400;3401;3402;3403;3404	3389	227		17	0	0	0	465500000	11881000	71506000	334460000	170100000	129310000
398	EVQCLSTNQTLSTR	WSPCSRSCQGGTQTREVQCLSTNQTLSTRC	REVQCLSTNQTLSTRCPPQLRPSRKRPCNS	R	E	V	T	R	C	14	0	1635.79	B7ZMJ3;Q6UY14;Q9UFG7;A8KAH2	B7ZMJ3	955	968	ADAMTSL4;DKFZp434K1772	ADAMTS-like protein 4	yes	no	2	3.3735e-159	274.2	0	0	0	271490000	0	0	543550000	1000900000	735970000	437	436	2360;2361;2362;2363;2364;2365;2366	3406;3407;3408;3409;3410;3411;3412;3413;3414	3408	778		9	0	0	0	132330000	0	0	70221000	78223000	79872000
401	EWDNTTTECR	YHLVGKKTLFCNASKEWDNTTTECRLGHCP	CNASKEWDNTTTECRLGHCPDPVLVNGEFS	K	E	W	C	R	L	10	0	1310.52	Q5VVQ7;B4DDY0;P20851	Q5VVQ7	68	77	C4BPB	C4b-binding protein beta chain	yes	no	2	0.00070176	151.97	0	0	0	29901000	0	0	0	110410000	0	363	439	2396;2397	3456;3457	3457	658		2	0	0	0	14574000	0	0	0	8628500	0
406	FECHFFNGTER	______________________________	KQDKFECHFFNGTERVRYLHRGIYNQEENV	K	F	E	E	R	V	11	0	1442.6	Q31639;F2VNU9;F2VNV1;F2VNV2;F2VNW0;F2VNW3;F2VNW4;F2X650;F2X651;F4NBK5;F4NBM0;F4NBM1;E9NVH6;H8WV70;H8WV71;H8WV72;Q5U9D1;Q5XWD6;F1CCN8;F2VNV0;A0A0G2R120;Q6S5I0;A0A0A7C4W1;F4NBM2;D9U3I0;A0A141AZJ6;E0X9N0;E1U685;E1U687;E2D5U2;E2D5U9;E2DHB9;E2GJP1;E3SGD3;E3SGD6;E3SWP6;E3SWQ7;E7D850;F4NBM3;A0A0K0KRS0;L0BVW1;Q860Y8;H8WV56;U5IQJ3;V5JAP2;V5TG83;W0HE86;R4S4G5;Q5DUF5;Q59HP9;Q546B9;I0J8R2;I1V1W8;I2CSG7;I6NN6…	Q31639	8	18	HLA-DRB1;HLA-DR10;HLA-C;HLA DRB1;HLA-DR9;HLA-DRB7;DRB1	HLA class II histocompatibility antigen, DRB1-1 beta chain;HLA class II histocompatibility antigen, DRB1-9 beta chain;HLA class II histocompatibility antigen, DRB1-10 beta chain	yes	no	3	0.0022701	99.5	0	0	0	103340000	0	0	0	0	0	3	444	2403;2404;2405	3463;3464;3465	3463	3		3	0	0	0	50369000	0	0	0	0	0
407	FELLGCELNGCANPLGLK	VRLYPTSCHTACTLRFELLGCELNGCANPL	LGCELNGCANPLGLKNNSIPDKQITASSSY	R	F	E	L	K	N	18	0	2003.98	B3KTQ2;A0A024RC55;Q08431;B4E396;X6R3G6;A0A024RC59	B3KTQ2	212	229	MFGE8	Lactadherin;Lactadherin short form;Medin	yes	no	2	5.4448e-128	279.77	56407000	18806000	31270000	26512000	0	0	293480000	287810000	163770000	98	445	2406;2407;2408;2409;2410;2411;2412	3466;3467;3468;3469;3470;3471;3472;3473;3474	3472	212		9	56407000	15888000	33528000	12923000	0	0	37915000	22493000	17774000
408	FENQTGFPPPDSR	AQCGGGLLGVRTLYRFENQTGFPPPDSRFD	YRFENQTGFPPPDSRFDAYCFKRRMSDLSV	R	F	E	S	R	F	13	0	1490.68	D6RGZ6;A0A024RAL1;A0A024RAQ9;Q59FG9;P13611;Q86W61;E9PF17;A0A024RAP3	D6RGZ6	328	340	VCAN;CSPG2	Versican core protein	yes	no	2	1.9633e-117	267.75	162320000	401700000	216810000	363190000	79858000	376030000	4941400000	4578200000	6831100000	93	446	2413;2414;2415;2416;2417;2418;2419;2420;2421;2422;2423;2424;2425;2426;2427;2428;2429;2430;2431;2432;2433;2434;2435	3475;3476;3477;3478;3479;3480;3481;3482;3483;3484;3485;3486;3487;3488;3489;3490;3491;3492;3493;3494;3495;3496;3497;3498;3499;3500;3501;3502;3503;3504;3505;3506;3507;3508;3509;3510;3511;3512;3513	3503	195		39	162320000	339360000	232460000	177030000	97331000	323600000	638380000	357800000	741350000
409	FEVDSPVYNATWSASLK	PAGIVIPSFQALTARFEVDSPVYNATWSAS	VDSPVYNATWSASLKNKADYVETVLDSTCS	R	F	E	L	K	N	17	0	1912.92	E1A689;C0JYY2;P04114;Q59HB3	E1A689	3887	3903	APOB	Apolipoprotein B-100;Apolipoprotein B-48	yes	no	2	1.1697e-65	201.95	0	0	0	163390000	0	0	0	0	0	442	447	2436;2437;2438	3514;3515;3516;3517;3518;3519;3520	3520	782		7	0	0	0	79641000	0	0	0	0	0
410	FFAENETWVVDSCTTCTCK	PPKTRNMSACWQDGRFFAENETWVVDSCTT	NETWVVDSCTTCTCKKFKTICHQITCPPAT	R	F	F	C	K	K	19	0	2353.97	P35442;A0A3B3ITK0	P35442	326	344	THBS2	Thrombospondin-2	yes	no	3	0.022905	46.461	0	0	0	6044900	0	0	0	0	0	262	448	2439	3521	3521	500		1	0	0	0	2946400	0	0	0	0	0
412	FGCEIENNR	EYYNDSNGSHVLQGRFGCEIENNRSSGAFW	HVLQGRFGCEIENNRSSGAFWKYYYDGKDY	R	F	G	N	R	S	9	0	1137.49	A0JLQ0;C9JEV0;A0A140VK00;P25311	A0JLQ0	121	129	AZGP1	Zinc-alpha-2-glycoprotein	yes	no	2	0.0029425	120.46	0	0	0	0	0	0	0	67432000	0	199	450	2441;2442;2443	3523;3524;3525	3524	377		3	0	0	0	0	0	0	0	5269900	0
413	FGEFGNYSLLVK	NDTLEEKEVCRLEYRFGEFGNYSLLVKNIH	EYRFGEFGNYSLLVKNIHNGVSEIACDLAV	R	F	G	V	K	N	12	0	1372.7	Q68CP4;E5RJC4;Q8IVU6	Q68CP4	157	168	HGSNAT	Heparan-alpha-glucosaminide N-acetyltransferase	yes	no	2	1.1712e-05	140.49	0	0	0	8976000	0	0	0	0	0	603	451	2444	3526	3526	1127		1	0	0	0	4375200	0	0	0	0	0
415	FGHSPLVNLTGGLSHASDVVLYHQHK	YGVTYINNRVFKIHKFGHSPLVNLTGGLSH	GLSHASDVVLYHQHKQPEVTNPCDRKKCEW	K	F	G	H	K	Q	26	0	2812.44	Q07954;Q59FG2	Q07954	4118	4143	LRP1	Prolow-density lipoprotein receptor-related protein 1;Low-density lipoprotein receptor-related protein 1 85 kDa subunit;Low-density lipoprotein receptor-related protein 1 515 kDa subunit;Low-density lipoprotein receptor-related protein 1 intracellular domain	yes	no	4;5	1.0938e-115	245.09	0	10142000	0	71927000	70870000	48279000	0	0	0	575	453	2446;2447;2448;2449;2450;2451;2452	3528;3529;3530;3531;3532;3533;3534;3535;3536	3530	1063		9	0	8568400	0	35060000	86377000	41548000	0	0	0
416	FGTCSQLCNNTK	VPGQPGCQDINECLRFGTCSQLCNNTKGGH	CLRFGTCSQLCNNTKGGHLCSCARNFMKTH	R	F	G	T	K	G	12	0	1428.61	Q07954;Q59FG2;Q6LBN5	Q07954	3831	3842	LRP1	Prolow-density lipoprotein receptor-related protein 1;Low-density lipoprotein receptor-related protein 1 85 kDa subunit;Low-density lipoprotein receptor-related protein 1 515 kDa subunit;Low-density lipoprotein receptor-related protein 1 intracellular domain	yes	no	2	2.6397e-203	320.02	15701000	20866000	15579000	131680000	47170000	33216000	718950000	619450000	329840000	575	454	2453;2454;2455;2456;2457;2458;2459;2460;2461	3537;3538;3539;3540;3541;3542;3543;3544;3545	3543	1064		9	15701000	17628000	16704000	64183000	57491000	28585000	92882000	48412000	35796000
417	FHLANR	PGGGGEMENTLQLIKFHLANRTVVDSSVFP	MENTLQLIKFHLANRTVVDSSVFPAEGLIP	K	F	H	N	R	T	6	0	756.403	B4DNG0;M1LAK4;Q9NRN5	B4DNG0	183	188	OLFML3	Olfactomedin-like protein 3	yes	no	2	2.0381e-07	142.14	0	0	0	0	0	0	0	0	0	382	455	2462;2463;2464;2465	3546;3547;3548;3549	3546	691		4	0	0	0	0	0	0	0	0	0
418	FIFSLPPEIIHNPNFTVR	TISADDKDDTANGPRFIFSLPPEIIHNPNF	SLPPEIIHNPNFTVRDNRDNTAGVYARRGG	R	F	I	V	R	D	18	0	2140.15	H3BUU9;B4DMA7;Q96CZ9;Q59EQ1;P55287	H3BUU9	401	418	CDH11	Cadherin-11	yes	no	3	4.1877e-06	107.75	0	0	0	19209000	0	0	0	0	0	377	456	2466;2467;2468	3550;3551;3552	3552	683		3	0	0	0	9363200	0	0	0	0	0
419	FINYNQTVSR	NLIPYSPDVQIHAERFINYNQTVSRMRGIY	IHAERFINYNQTVSRMRGIYTAPSGLESTC	R	F	I	S	R	M	10	0	1240.62	Q8N766	Q8N766	909	918	EMC1	ER membrane protein complex subunit 1	yes	yes	2	3.0959e-22	220.1	5772200	0	0	55685000	43758000	25328000	0	689350000	285140000	637	457	2469;2470;2471;2472;2473;2474;2475;2476	3553;3554;3555;3556;3557;3558;3559;3560;3561	3560	1196		9	5772200	0	0	27143000	53332000	21797000	0	53874000	30946000
421	FITLLADTSDSRALENR	AASSSVCKLDGLIHRFITLLADTSDSRALE	TLLADTSDSRALENRGADASMACRKLAVAH	R	F	I	N	R	G	17	1	1920.99	A4D213;A4D212;Q8N201	A4D213	2060	2076	DKFZP586J0619;INTS1	Integrator complex subunit 1	yes	no	2	0.010593	82.417	0	0	0	0	0	0	0	434480000	0	277	459	2478	3563	3563	519		1	0	0	0	0	0	0	0	33955000	0
423	FLEPYNDSIQAQK	SDTESWDQHVQKLNKFLEPYNDSIQAQKND	NKFLEPYNDSIQAQKNDVCRPGRYYEQPDN	K	F	L	Q	K	N	13	0	1551.76	P14415;I3L1V9	P14415	113	125	ATP1B2	Sodium/potassium-transporting ATPase subunit beta-2	yes	no	2	5.6407e-16	147.95	0	0	0	0	0	0	0	0	58275000	546	461	2485;2486;2487	3572;3573;3574;3575	3572	984		4	0	0	0	0	0	0	0	0	6324400
424	FLEYSTSECHFFNGTER	______________________________	EYSTSECHFFNGTERVRFLERYFHNQEENV	R	F	L	E	R	V	17	0	2122.91	H8WV86;R4S853;Q9TQ62;Q9TQ61;Q9TQ48;Q9TQ42;Q9TQ41;Q9TPE1;Q9TQ64;Q9TP92;Q9TNV2;Q9NPL1;Q9MYG3;Q9MY91;Q9GJG2;Q9GJF7;Q9GIY9;Q9TNV3;Q9GIY6;Q9UIM7;Q9UM34;R9WSK7;R9USG0;Q9TQ63;J7RFS4;M9PAH5;F8RHK1;F8RHM5;G8HT84;G8HT85;G8HT86;G8HT87;F8RHJ4;F8RHJ5;F8RHJ7;F8RHJ9;F8RHK2;J7K483;F8RHK5;F8RHK6;F8RHK8;F8RHK9;F8RHL0;F8RHL1;F8RHL5;F8RHL7;F8RHJ2;Q95HK3;R4S813;Q95HK2;R4QU67;Q7YQ32;Q7YQ31;Q7YQ27;Q7YPZ9;Q7YPZ8;Q7YPZ4;…	H8WV86	2	18	HLA-DRB1;HLA-C;HLA DRB1;DRB1;HLA-DRB3;HLA-DRB;HLA-DRB1*1302Var;DRB1*1116;MHC class II HLA DRB1-0305;HLA-DRB11;HLA;HLA-DRB1*11;HLA-D;HLA-DRB4;HLA-DRB5;DRB1*11;HLA-DQB1;HLA-DRB1-1113;HLA-DRB52;HLA-DR-beta;DRB1*1303;DRB52;HLA-A;DRB1*13PL;HLA DRB1 gene;HLA-DRBI*1303;MHC class II HLA-DRB1*1315;HLA-DRB1*1324;HLA-DR3;HLA-DR;DRB1 HAG;HLA-DRB1-11	HLA class II histocompatibility antigen, DRB1-13 beta chain;HLA class II histocompatibility antigen, DRB1-3 chain;HLA class II histocompatibility antigen, DRB1-11 beta chain;HLA class II histocompatibility antigen, DRB1-14 beta chain	yes	no	3	0.0004533	102.08	0	0	0	82048000	0	0	0	0	0	0	462	2488	3576;3577;3578	3578	0		3	0	0	0	39992000	0	0	0	0	0
425	FLNDSIVDPVDSEWFGFYR	YKKNLMALKKFVMVKFLNDSIVDPVDSEWF	SIVDPVDSEWFGFYRSGQAKETIPLQETSL	K	F	L	Y	R	S	19	0	2305.07	E9PIA8;A0A286YFE3;A0A2C9F2P4;A0A286YFL8;A0A286YFF7;P50897;E9PSE5	E9PIA8	153	171	PPT1	Palmitoyl-protein thioesterase 1	yes	no	2	1.5447e-137	218.16	0	0	0	0	0	0	0	0	0	226	463	2489	3579	3579	421		1	0	0	0	0	0	0	0	0	0
426	FLNDTMAVYEAK	GSALFLSHNLKFLAKFLNDTMAVYEAKLFH	LAKFLNDTMAVYEAKLFHTNFYDTVGTIQL	K	F	L	A	K	L	12	0	1400.66	P29622;A0A024R6I9;B2R815	P29622	155	166	SERPINA4	Kallistatin	yes	no	2	2.9156e-06	181.68	6266100	41478000	7693000	100890000	0	0	282060000	665150000	386930000	52	464;465	2490;2491;2492;2493;2494;2495;2496;2497;2498;2499;2500;2501	3580;3581;3582;3583;3584;3585;3586;3587;3588;3589;3590;3591;3592;3593;3594;3595;3596	3586	86	2	16	6266100	35041000	8248500	49177000	0	0	36440000	51983000	41992000
427	FLNNGTCTAEGK	YCQQKSLECLHPGTKFLNNGTCTAEGKFSV	GTKFLNNGTCTAEGKFSVSLKHGNTDSEGI	K	F	L	G	K	F	12	0	1310.59	Q6LAM1;Q8WW88;A0A087X0I2;G3XAM2;A0A0U4BCF5;A8K3L0;E7ETH0;B4DRF2;A0A2R8Y3M9;P05156;D6R9Z8	Q6LAM1	82	93	CFI	Complement factor I;Complement factor I heavy chain;Complement factor I light chain	yes	no	2	1.6081e-30	167.67	0	37442000	0	95010000	0	30589000	249410000	683280000	615760000	139	466	2502;2503;2504;2505;2506;2507;2508;2509;2510	3597;3598;3599;3600;3601;3602;3603;3604;3605;3606;3607	3605	269		11	0	31631000	0	46311000	0	26324000	32222000	53400000	66826000
428	FLNVTPNVEVNVECR	KKFHVNYTQPLVAVKFLNVTPNVEVNVECR	FLNVTPNVEVNVECRINAANIATDDERDKF	K	F	L	C	R	I	15	0	1788.88	P14415;I3L3J8	P14415	248	262	ATP1B2	Sodium/potassium-transporting ATPase subunit beta-2	yes	no	2	9.2034e-21	151.26	0	0	0	11517000	0	0	0	56453000	0	546	467	2511;2512;2513;2514;2515	3608;3609;3610;3611;3612;3613	3611	985		6	0	0	0	5613700	0	0	0	4411900	0
430	FLSSSPHLPPSSYFNASGR	NVFPRPSYQEEAVTKFLSSSPHLPPSSYFN	SPHLPPSSYFNASGRAYPDVAALSDGYWVV	K	F	L	G	R	A	19	0	2049.99	A0A2R8YGD1;B4E0C7;A0A2R8YD45;B2R608;D3DQU2;B4DIV8;O14773;B4DE89;B4DSE2;A0A2R8Y7U1;Q53HP2	A0A2R8YGD1	336	354	TPP1	Tripeptidyl-peptidase 1	yes	no	3	7.5012e-06	112.74	0	0	0	18400000	0	0	0	0	0	238	469	2523;2524;2525;2526	3621;3622;3623;3624	3621	433		4	0	0	0	8968600	0	0	0	0	0
433	FNDTEVLQR	SPQVVRWNPCLEPHRFNDTEVLQRLSCMAI	CLEPHRFNDTEVLQRLSCMAIRGDMFLVAN	R	F	N	Q	R	L	9	0	1120.55	C9JSN9;P43251	C9JSN9	129	137	BTD	Biotinidase	yes	no	2	0.017869	96.331	0	0	0	12090000	0	0	0	0	0	448	472	2532	3630	3630	792		1	0	0	0	5893200	0	0	0	0	0
434	FNFDGGECCDPEITNVTQTCFDPDSPHR	KQHNGVCDMDCNYERFNFDGGECCDPEITN	TNVTQTCFDPDSPHRAYLDVNELKNILKLD	R	F	N	H	R	A	28	0	3314.33	Q13219;A0A024R842;B4DTA7	Q13219	466	493	PAPPA	Pappalysin-1	yes	no	3	1.6216e-05	85.537	0	0	0	6429400	0	0	0	0	0	65	473	2533	3631;3632	3631	109		2	0	0	0	3133900	0	0	0	0	0
435	FNGSVSFFR	DMTTEGGKWTVFQKRFNGSVSFFRGWNDYK	TVFQKRFNGSVSFFRGWNDYKLGFGRADGE	R	F	N	F	R	G	9	0	1059.51	K7ES70;A0A024QZ34;P55083	K7ES70	111	119	MFAP4	Microfibril-associated glycoprotein 4	yes	no	2	6.5271e-13	210.1	158350000	128050000	75092000	180590000	75806000	164330000	1283700000	0	744010000	7	474	2534;2535;2536;2537;2538;2539;2540;2541	3633;3634;3635;3636;3637;3638;3639;3640;3641;3642;3643;3644	3635	7		12	158350000	108170000	80514000	88027000	92392000	141420000	165840000	0	80744000
436	FNISIEPVIYVVQR	TELQSGQLEVKWSSKFNISIEPVIYVVQRR	KFNISIEPVIYVVQRRWNYGIHPSEDDATH	K	F	N	Q	R	R	14	0	1675.93	A0A1B0RPQ5;P23352	A0A1B0RPQ5	208	221	KAL1	Anosmin-1	yes	no	2	3.823e-41	230.41	177560000	93930000	87463000	30820000	14009000	40669000	448890000	587070000	1005800000	211	475	2542;2543;2544;2545;2546;2547;2548;2549;2550	3645;3646;3647;3648;3649;3650;3651;3652;3653;3654;3655;3656	3646	392		12	177560000	79353000	93778000	15022000	17074000	34999000	57992000	45881000	109150000
437	FNLTETSEAEIHQSFQHLLR	GAHNTTLTEILKGLKFNLTETSEAEIHQSF	TSEAEIHQSFQHLLRTLNQSSDELQLSMGN	K	F	N	L	R	T	20	0	2399.19	A0A024R6P0;B3KS79;P01011;G3V595	A0A024R6P0	105	124	SERPINA3	Alpha-1-antichymotrypsin;Alpha-1-antichymotrypsin His-Pro-less	yes	no	2;3;4	0	421.06	0	882430000	0	128770000	157600000	140610000	1263000000	6481100000	2951200000	55	476	2551;2552;2553;2554;2555;2556;2557;2558;2559;2560;2561;2562;2563;2564;2565;2566;2567;2568;2569	3657;3658;3659;3660;3661;3662;3663;3664;3665;3666;3667;3668;3669;3670;3671;3672;3673;3674;3675;3676;3677;3678;3679;3680;3681;3682;3683;3684	3680	90		28	0	745490000	0	62766000	192080000	121010000	163170000	506510000	320280000
438	FNPNISWQPIPVHTVPITEDR	EANLAGLFPPNGMQRFNPNISWQPIPVHTV	WQPIPVHTVPITEDRLLKFPLGPCPRYEQL	R	F	N	D	R	L	21	0	2459.26	B7Z7D2;E9PQY3;B7Z552;B7Z6L8;P11117;E9PKW9;E9PQW9;B7Z6T8;B7Z6U3;E9PP23;E9PHY0;B7Z4Z2	B7Z7D2	98	118	ACP2	Lysosomal acid phosphatase	yes	no	3	3.8343e-12	127.01	0	0	0	26233000	0	0	0	0	0	423	477	2570	3685;3686;3687	3686	756		3	0	0	0	12787000	0	0	0	0	0
439	FNSSSSSLEEK	VIETDMQIMVRLINKFNSSSSSLEEKIAAL	LINKFNSSSSSLEEKIAALFDLEYYVHQMD	K	F	N	E	K	I	11	0	1213.55	D6REA1;A0A0S2Z6B4;Q9H173	D6REA1	199	209	SIL1	Nucleotide exchange factor SIL1	yes	no	2	2.3771e-15	176.48	18926000	46973000	37986000	13996000	0	5501500	0	0	0	188	478	2571;2572;2573;2574;2575;2576;2577;2578	3688;3689;3690;3691;3692;3693;3694;3695;3696	3695	361		9	18926000	39683000	40729000	6822200	0	4734400	0	0	0
440	FNSSYLQGTNQITGR	RDPNTGRLNGESNLRFNSSYLQGTNQITGR	FNSSYLQGTNQITGRYEDGTLSLTSTSDLQ	R	F	N	G	R	Y	15	0	1684.82	E1A689;C0JYY2;P04114	E1A689	1522	1536	APOB	Apolipoprotein B-100;Apolipoprotein B-48	yes	no	2	1.5516e-100	266.97	0	10197000	0	160980000	11329000	40817000	244630000	236540000	0	442	479	2579;2580;2581;2582;2583;2584	3697;3698;3699;3700;3701;3702	3702	783		6	0	8614200	0	78468000	13808000	35126000	31604000	18486000	0
441	FNSTEYQVVTR	NANAQQKTSVIRVNRFNSTEYQVVTRVDKG	RVNRFNSTEYQVVTRVDKGGALHIYHQRRQ	R	F	N	T	R	V	11	0	1342.65	Q07954	Q07954	445	455	LRP1	Prolow-density lipoprotein receptor-related protein 1;Low-density lipoprotein receptor-related protein 1 85 kDa subunit;Low-density lipoprotein receptor-related protein 1 515 kDa subunit;Low-density lipoprotein receptor-related protein 1 intracellular domain	yes	yes	2	5.0635e-08	189.57	80774000	166770000	67741000	401010000	168490000	161520000	1214700000	2461300000	1336400000	575	480	2585;2586;2587;2588;2589;2590;2591;2592;2593	3703;3704;3705;3706;3707;3708;3709;3710;3711;3712;3713;3714;3715;3716	3713	1065		14	80774000	140890000	72632000	195460000	205350000	139000000	156930000	192360000	145030000
443	FNTTYINIGSSYFPEHGYFR	YASFSEGTAALQTVKFNTTYINIGSSYFPE	INIGSSYFPEHGYFRAPERGVYLFAVSVEF	K	F	N	F	R	A	20	0	2412.12	B4DEW5;B4E3H8;Q9H8L6	B4DEW5	622	641	MMRN2	Multimerin-2	yes	no	2;3	6.5164e-46	207.39	0	0	0	3810900	0	31242000	0	0	0	366	482	2595;2596	3719;3720;3721;3722	3719	662		4	0	0	0	1857600	0	26886000	0	0	0
444	FQAFANGSLLIPDFGK	GRALPGTPVASSQPRFQAFANGSLLIPDFG	QAFANGSLLIPDFGKLEEGTYSCLATNELG	R	F	Q	G	K	L	16	0	1723.89	A0A146E5L3;O14498	A0A146E5L3	304	319	ISLR	Immunoglobulin superfamily containing leucine-rich repeat protein	yes	no	2	2.8539e-12	147.73	0	0	0	218380000	0	0	174120000	0	0	202	483	2597;2598;2599	3723;3724;3725;3726	3723	381		4	0	0	0	106440000	0	0	22495000	0	0
445	FQLLNFSSSELK	QTIYFRDFRPLKDSRFQLLNFSSSELKVSL	DSRFQLLNFSSSELKVSLTNVSISDEGRYF	R	F	Q	L	K	V	12	0	1411.73	F5H125;H0YG94;A0A087X0T8;A0A4Z1;A0A087X1W8;A0A0A0MTJ8;X5D8W0;X5DQS5;X5DQR8;X5DNF2;X5D7A8;Q9BY67	F5H125	64	75	CADM1	Cell adhesion molecule 1	yes	no	2	1.1254e-21	195.27	0	0	0	0	141410000	112260000	0	242270000	0	142	484	2600;2601;2602;2603	3727;3728;3729;3730;3731;3732;3733	3731	278		7	0	0	0	0	172350000	96606000	0	18934000	0
446	FQVNNTRPPHVQLLR	SYHPHPFAQRTLTARFQVNNTRPPHVQLLR	FQVNNTRPPHVQLLRKPVLTAMGLLALLDE	R	F	Q	L	R	K	15	0	1818	D3DVN8;D6REB5;Q56A80;D3DVN7;A8K701;P35475	D3DVN8	177	191	IDUA	Alpha-L-iduronidase	yes	no	4	0.0013339	95.651	4222600	0	0	7888000	16148000	8444100	0	0	0	304	485	2604;2605;2606;2607	3734;3735;3736;3737;3738;3739	3738	565		6	4222600	0	0	3844800	19682000	7266700	0	0	0
448	FSDGLESNSSTQFEVK	IPDISEPGTWKISARFSDGLESNSSTQFEV	SDGLESNSSTQFEVKKYVLPNFEVKITPGK	R	F	S	V	K	K	16	0	1773.81	F5GXS0;A0A140TA49;A0A140TA44;A0A140TA32;A0A140TA29;A0A0G2JL54;A0A0G2JPR0;P0C0L5;P0C0L4;B7Z1F8;B4DIE5	F5GXS0	219	234	C4B;C4A	Complement C4-B;Complement C4 beta chain;Complement C4-B alpha chain;C4a anaphylatoxin;C4b-B;C4d-B;Complement C4 gamma chain;Complement C4-A;Complement C4 beta chain;Complement C4-A alpha chain;C4a anaphylatoxin;C4b-A;C4d-A;Complement C4 gamma chain	yes	no	2	0	350.9	176940000	193110000	79744000	401510000	0	42473000	510440000	1197300000	2731900000	170	487	2613;2614;2615;2616;2617;2618;2619;2620;2621;2622;2623;2624;2625;2626;2627;2628	3746;3747;3748;3749;3750;3751;3752;3753;3754;3755;3756;3757;3758;3759;3760;3761;3762;3763;3764;3765;3766;3767	3750	334		20	176940000	163140000	85501000	195710000	0	36551000	65944000	93572000	296490000
453	FTFTSHTPGDHQICLHSNSTR	DGKVVLSRQYGSEGRFTFTSHTPGDHQICL	TPGDHQICLHSNSTRMALFAGGKLYREERF	R	F	T	T	R	M	21	0	2442.11	F8W7F7;Q7Z7H5	F8W7F7	100	120	TMED4	Transmembrane emp24 domain-containing protein 4	yes	no	3;4;5	9.2003e-36	196.62	40693000	86543000	22533000	85175000	83483000	124610000	495620000	373340000	0	481	493	2659;2660;2661;2662;2663;2664;2665;2666;2667;2668;2669	3812;3813;3814;3815;3816;3817;3818;3819;3820;3821;3822;3823;3824;3825;3826;3827;3828	3823	850		16	40693000	73112000	24160000	41517000	101750000	107230000	64030000	29177000	0
454	FTFTSHTPGEHQICLHSNSTK	EDKVILARQYGSEGRFTFTSHTPGEHQICL	TPGEHQICLHSNSTKFSLFAGGMLVSGPM_	R	F	T	T	K	F	21	0	2428.12	B4DPP4;A0A024R7M0;Q9BVK6	B4DPP4	87	107	TMED9	Transmembrane emp24 domain-containing protein 9	yes	no	3;4;5	5.2794e-35	192.25	18697000	35370000	17283000	147620000	65368000	0	0	0	0	60	494	2670;2671;2672;2673;2674;2675;2676	3829;3830;3831;3832;3833;3834;3835;3836;3837;3838;3839	3834	100		11	18697000	29881000	18530000	71955000	79671000	0	0	0	0
455	FTPPVVNVTWLR	VELREPNVLICVIDKFTPPVVNVTWLRNGK	IDKFTPPVVNVTWLRNGKPVTTGVSETVFL	K	F	T	L	R	N	12	0	1427.79	B4E2U4;Q59GE3;B0UXD8;A0A1V0E3V4;A0A0G2JMH6;P01903;Q30118;B4DVL4;A0A0G2JH46;Q7YPT8	B4E2U4	77	88	HLA-DRA1;HLA-DRA;HLA-DQA1/DRA	HLA class II histocompatibility antigen, DR alpha chain	yes	no	2	0.0046448	105.17	0	0	0	263830000	0	0	0	347280000	0	172	495	2677;2678;2679;2680	3840;3841;3842;3843;3844	3844	339		5	0	0	0	128600000	0	0	0	27140000	0
457	FVEGSHNSTVSLTTK	KRGLKLATALSLSNKFVEGSHNSTVSLTTK	FVEGSHNSTVSLTTKNMEVSVATTTKAQIP	K	F	V	T	K	N	15	0	1605.8	E1A689;C0JYY2;P04114;Q59HB3	E1A689	3405	3419	APOB	Apolipoprotein B-100;Apolipoprotein B-48	yes	no	3	9.3402e-05	117.37	0	0	0	149520000	56006000	72925000	987640000	1606800000	538750000	442	497	2684;2685;2686;2687;2688;2689	3848;3849;3850;3851;3852;3853	3853	784		6	0	0	0	72880000	68260000	62757000	127590000	125570000	58468000
458	FVGTPEVNQTTLYQR	PQTAFCNSDLVIRAKFVGTPEVNQTTLYQR	FVGTPEVNQTTLYQRYEIKMTKMYKGFQAL	K	F	V	Q	R	Y	15	0	1751.88	Q5H9B4;Q5H9B5;Q58P21;Q6FGX5;B3KQF4;P01033	Q5H9B4	58	72	TIMP1	Metalloproteinase inhibitor 1	yes	no	2	0	365.49	650130000	775040000	821770000	378580000	113380000	248530000	0	2604500000	4951300000	346	498	2690;2691;2692;2693;2694;2695;2696;2697	3854;3855;3856;3857;3858;3859;3860;3861;3862;3863;3864;3865;3866	3856	633		13	650130000	654760000	881100000	184530000	138190000	213870000	0	203550000	537350000
459	FVNSTGYLTEAEK	FYMDAYEVSNTEFEKFVNSTGYLTEAEKFG	EKFVNSTGYLTEAEKFGDSFVFEGMLSEQV	K	F	V	E	K	F	13	0	1457.7	F5GXA0;Q8NBK3	F5GXA0	139	151	SUMF1	Sulfatase-modifying factor 1	yes	no	2	1.0446e-09	184.36	0	0	0	8476500	0	7439200	40216000	139950000	99704000	478	499	2698;2699;2700;2701;2702	3867;3868;3869;3870;3871;3872	3870	848		6	0	0	0	4131700	0	6402000	5195500	10937000	10821000
460	FVNTTK	DTERLVLTFVDRLQKFVNTTKVLPFNKKGS	LTFVDRLQKFVNTTKVLPFNKKGSAVFHEI	K	F	V	T	K	V	6	0	708.381	O75339	O75339	548	553	CILP	Cartilage intermediate layer protein 1;Cartilage intermediate layer protein 1 C1;Cartilage intermediate layer protein 1 C2	yes	yes	1;2	0.00047861	150.02	0	5897500000	0	261870000	775470000	0	8006600000	0	0	515	500	2703;2704;2705;2706;2707;2708;2709;2710	3873;3874;3875;3876;3877;3878;3879;3880	3876	911		4	0	4982300000	0	127640000	945150000	0	1034400000	0	0
461	FVQGNSTEVACHPGYGLPK	FPYLENGYNQNYGRKFVQGNSTEVACHPGY	NSTEVACHPGYGLPKAQTTVTCTEKGWSPT	K	F	V	P	K	A	19	0	2059.98	Q8WW96;A0A087WYK9;Q6NSD3;Q02985	Q8WW96	104	122	CFHR3	Complement factor H-related protein 3	yes	no	3	1.8559e-14	138.08	16323000	27587000	0	29966000	10547000	22333000	435960000	563730000	267120000	135	501	2711;2712;2713;2714;2715;2716;2717;2718	3881;3882;3883;3884;3885;3886;3887;3888;3889;3890;3891	3891	262		11	16323000	23306000	0	14606000	12855000	19219000	56322000	44057000	28989000
463	FWLVEGNSSR	YKVMYKEKDSDTQPRFWLVEGNSSRSAQLT	DTQPRFWLVEGNSSRSAQLTGLGKYVLYEV	R	F	W	S	R	S	10	0	1193.58	Q58EX2;H7C2P2	Q58EX2	1250	1259	SDK2	Protein sidekick-2	yes	no	2	0.00040753	126.41	0	7499000	0	8386200	0	0	211700000	196540000	74509000	594	503	2720;2721;2722;2723;2724	3893;3894;3895;3896;3897;3898;3899	3894	1110		7	0	6335200	0	4087700	0	0	27350000	15360000	8086200
465	FYNVSTHSPLAR	VSVYDYYEPAFEATRFYNVSTHSPLARELC	ATRFYNVSTHSPLARELCAGPACNEVERAP	R	F	Y	A	R	E	12	0	1390.7	Q8IZJ3;M0QXH3;M0R0Z5	Q8IZJ3	1658	1669	CPAMD8	C3 and PZP-like alpha-2-macroglobulin domain-containing protein 8	yes	no	2;3	0.010253	83.862	7902000	10187000	3018000	0	0	0	0	0	0	635	505	2731;2732;2733	3908;3909;3910	3910	1192		3	7902000	8606100	3235900	0	0	0	0	0	0
466	FYNYTLCR	PPGWKEWVGLLKNSRFYNYTLCRNGVKEKH	GLLKNSRFYNYTLCRNGVKEKHGSDYSKDY	R	F	Y	C	R	N	8	0	1135.51	Q8IWU5;B1AMP9	Q8IWU5	169	176	SULF2	Extracellular sulfatase Sulf-2	yes	no	2	0.00019194	192.28	62453000	88841000	47093000	0	0	9887500	377380000	218070000	774500000	633	506	2734;2735;2736;2737;2738;2739;2740	3911;3912;3913;3914;3915;3916;3917;3918;3919;3920	3920	1183		10	62453000	75053000	50493000	0	0	8508900	48754000	17043000	84053000
467	FYNYTVCR	PPGWREWLGLIKNSRFYNYTVCRNGIKEKH	GLIKNSRFYNYTVCRNGIKEKHGFDYAKDY	R	F	Y	C	R	N	8	0	1121.5	Q7Z2W2;A0A024R809;Q8IWU6	Q7Z2W2	168	175	DKFZp686F13142;SULF1	Extracellular sulfatase Sulf-1	yes	no	2	2.344e-11	145.04	8670700	0	10570000	18962000	0	0	0	0	0	63	507	2741;2742;2743;2744;2745;2746	3921;3922;3923;3924;3925;3926;3927;3928	3927	104		8	8670700	0	11333000	9242500	0	0	0	0	0
469	GAFISNFSMTVDGK	SPQPQNVVFDVQIPKGAFISNFSMTVDGKT	KGAFISNFSMTVDGKTFRSSIKEKTVGRAL	K	G	A	G	K	T	14	0	1472.7	Q5T987;Q5T985;A2RTY6;D3DRR6;P19823	Q5T987	88	101	ITIH2	Inter-alpha-trypsin inhibitor heavy chain H2	yes	no	2	1.6201e-09	152.85	7119800	0	0	85107000	0	67889000	0	0	0	270	509	2758;2759;2760;2761;2762	3941;3942;3943;3944;3945	3942	510		5	7119800	0	0	41484000	0	58423000	0	0	0
470	GANDSTSAMPEQMK	LRVGFLKPKFKDGGRGANDSTSAMPEQMKF	RGANDSTSAMPEQMKFQWIRVKRTHVPKGW	R	G	A	M	K	F	14	0	1465.62	O95084;B3KQQ9	O95084	205	218	PRSS23	Serine protease 23	yes	no	2	2.3602e-52	238.01	0	0	0	27091000	0	0	0	175470000	0	349	510	2763;2764	3946;3947;3948	3947	636		3	0	0	0	13205000	0	0	0	13713000	0
471	GAPGINGTK	GTEGFPGFPGYPGNRGAPGINGTKGYPGLK	GYPGNRGAPGINGTKGYPGLKGDEGEAGDP	R	G	A	T	K	G	9	0	813.434	A0A087X0S5;A0A384P5H7;P12109;B4DRR8;D3DSM7	A0A087X0S5	532	540	COL6A1	Collagen alpha-1(VI) chain	yes	no	2	0.020772	90.37	0	0	0	26138000	0	0	0	0	0	141	511	2765	3949	3949	275		1	0	0	0	12741000	0	0	0	0	0
473	GCGYLPGCPGSNGFHNNDTFHFLK	QEGEEGRPKDDRHLRGCGYLPGCPGSNGFH	GSNGFHNNDTFHFLKCCNTTKCNEGPILEL	R	G	C	L	K	C	24	0	2695.17	M0QYS6;M0R383;M0R0Y4;M0QYR6;Q9UPI5;M0R1I2;Q03405	M0QYS6	57	80	PLAUR	Urokinase plasminogen activator surface receptor	yes	no	4;5	0.023162	41.45	4544200	0	0	0	0	0	0	66838000	0	500	513;514	2767;2768	3951;3952	3952	876;877		2	4544200	0	0	0	0	0	0	5223500	0
476	GCVLLSYLNETVTVSASLESVR	MVLVPSLLHTETTEKGCVLLSYLNETVTVS	LNETVTVSASLESVRGNRSLFTDLEAENDV	K	G	C	V	R	G	22	0	2396.23	P01023;F5H1E8;F8W7L3	P01023	47	68	A2M	Alpha-2-macroglobulin	yes	no	2;3	1.6349e-11	100.45	0	0	0	0	0	0	0	0	7740900	520	518	2790;2791;2792;2793;2794	3977;3978;3979;3980;3981	3978	927		5	0	0	0	0	0	0	0	0	840090
478	GDKNVTMGQSSAR	ISPSNTELTLMIQERGDKNVTMGQSSARMK	ERGDKNVTMGQSSARMKLNWAVAAGAEDPG	R	G	D	A	R	M	13	1	1349.64	B3KUI0;P48960	B3KUI0	240	252	CD97	CD97 antigen;CD97 antigen subunit alpha;CD97 antigen subunit beta	yes	no	2	1.2939e-22	153.95	0	0	0	0	0	0	0	0	0	356	520	2799	3986	3986	645		1	0	0	0	0	0	0	0	0	0
483	GENFTETDVK	VNITIKQHTVTTTTKGENFTETDVKMMERV	TTTTKGENFTETDVKMMERVVEQMCITQYE	K	G	E	V	K	M	10	0	1138.51	B3KQX7;B4DI53;Q6SES1;Q6FGR8;Q6FGN5;Q5U0K3;Q53YK7;A1YVW6;A2A2V1;Q540C4;Q86XR1;B2NI05;B2NI04;B4DJ65;X6RKS3;B4DDS1;O75942;P04156	B3KQX7	105	114	PRNP	Major prion protein	yes	no	2	0.00032239	160.53	82621000	312810000	180920000	77027000	0	0	1259500000	1477800000	921110000	266	526	2818;2819;2820;2821;2822;2823;2824;2825;2826	4006;4007;4008;4009;4010;4011;4012;4013;4014;4015;4016;4017;4018;4019	4015	505		14	82621000	264260000	193980000	37545000	0	0	162710000	115490000	99965000
486	GETASLLCNISVR	VLEAVAWLAGGTVYRGETASLLCNISVRGG	YRGETASLLCNISVRGGPPGLRLAASWWVE	R	G	E	V	R	G	13	0	1418.72	Q969P0	Q969P0	455	467	IGSF8	Immunoglobulin superfamily member 8	yes	yes	2	1.638e-07	141.89	0	0	0	10817000	9282600	0	0	0	0	648	529	2832;2833;2834	4026;4027;4028	4027	1211		3	0	0	0	5272400	11314000	0	0	0	0
489	GFCEAPGNR	______________________________	SLSVRKGFCEAPGNRTQSGNHPEDWPVYQE	K	G	F	N	R	T	9	0	1006.43	H0YD57;Q6LET0;P27701	H0YD57	9	17	CD82;KAI1	Tetraspanin;CD82 antigen	yes	no	2	0.0074609	111.04	0	0	0	11190000	0	0	0	50522000	0	492	532	2840;2841	4036;4037;4038;4039	4038	870		4	0	0	0	5454500	0	0	0	3948400	0
490	GFEESEPVSGSFTTALDGPSGLVTANITDSEALAR	LIPGVEYLVSIIAMKGFEESEPVSGSFTTA	GLVTANITDSEALARWQPAIATVDSYVISY	K	G	F	A	R	W	35	0	3524.68	P24821;E9PC84;J3QSU6;A0A024R884;Q4LE33;A7MBN2;F5H7V9;D3YHM4;H0YGZ3	P24821	1784	1818	TNC;TNC variant protein	Tenascin	yes	no	3	6.0876e-101	211.4	0	56246000	0	2239200000	0	0	2690900000	5064600000	4034700000	553	533	2842;2843;2844;2845;2846;2847;2848;2849;2850	4040;4041;4042;4043;4044;4045;4046;4047;4048;4049;4050;4051;4052;4053;4054;4055;4056;4057;4058;4059;4060;4061;4062	4061	999		23	0	47517000	0	1091500000	0	0	347640000	395810000	437870000
492	GFGVAIVGNYTAALPTEAALR	GWHWVGAHTLGHNSRGFGVAIVGNYTAALP	VGNYTAALPTEAALRTVRDTLPSCAVRAGL	R	G	F	L	R	T	21	0	2090.12	Q96PD5	Q96PD5	477	497	PGLYRP2	N-acetylmuramoyl-L-alanine amidase	yes	yes	2;3	2.41e-157	283.82	30291000	64012000	24001000	119230000	36669000	84843000	0	298980000	219790000	652	535	2854;2855;2856;2857;2858;2859;2860;2861;2862;2863	4066;4067;4068;4069;4070;4071;4072;4073;4074;4075;4076;4077	4070	1216		12	30291000	54078000	25734000	58116000	44693000	73014000	0	23366000	23853000
493	GFIISNATYK	TLIPDGKRIIWDSRKGFIISNATYKEIGLL	WDSRKGFIISNATYKEIGLLTCEATVNGHL	K	G	F	Y	K	E	10	0	1112.59	A0A1W2PNW4;L7RSL3;P17948	A0A1W2PNW4	191	200	FLT1	Receptor protein-tyrosine kinase;Vascular endothelial growth factor receptor 1	yes	no	2	0.01315	88.948	5522200	4013200	0	0	0	0	0	0	0	218	536	2864;2865;2866;2867	4078;4079;4080;4081;4082;4083	4082	409		6	5522200	3390400	0	0	0	0	0	0	0
494	GFQWVTGDNNTSYSR	PAPGCGDPKRLGPLRGFQWVTGDNNTSYSR	GFQWVTGDNNTSYSRWARLDLNGAPLCGPL	R	G	F	S	R	W	15	0	1730.76	B3KVV1;P07204	B3KVV1	89	103	THBD	Thrombomodulin	yes	no	2	1.7391e-19	147.71	0	0	18698000	0	0	0	0	0	0	357	537	2868;2869;2870	4084;4085;4086	4084	647;648		3	0	0	20048000	0	0	0	0	0	0
497	GGNVTLPCK	HLLVEAEQAKVFSHRGGNVTLPCKFYRDPT	KVFSHRGGNVTLPCKFYRDPTAFGSGIHKI	R	G	G	C	K	F	9	0	944.475	A0A024RAK9;P10915;D6RBS1;D6RG04;D6RBX9;D6RC59;D6RAK7;D6RFI7	A0A024RAK9	54	62	HAPLN1	Hyaluronan and proteoglycan link protein 1	yes	no	1;2	0.0018443	163.32	73936000000	105560000000	137510000000	39559000000	64892000000	62039000000	141140000000	138410000000	153040000000	92	542	2891;2892;2893;2894;2895;2896;2897;2898;2899;2900;2901;2902;2903;2904;2905	4115;4116;4117;4118;4119;4120;4121;4122;4123;4124;4125;4126;4127;4128;4129;4130;4131;4132;4133;4134;4135;4136;4137;4138;4139;4140;4141;4142;4143;4144;4145;4146;4147;4148;4149;4150;4151;4152;4153;4154;4155	4120	192		39	73936000000	89177000000	147440000000	19282000000	79091000000	53389000000	18234000000	10817000000	16609000000
498	GGNVTLPCKFYR	HLLVEAEQAKVFSHRGGNVTLPCKFYRDPT	SHRGGNVTLPCKFYRDPTAFGSGIHKIRIK	R	G	G	Y	R	D	12	1	1410.71	A0A024RAK9;P10915;D6RBS1;D6RG04;D6RBX9;D6RC59;D6RAK7;D6RFI7	A0A024RAK9	54	65	HAPLN1	Hyaluronan and proteoglycan link protein 1	yes	no	2;3	0.0012687	123.88	29615000	0	74051000	0	0	0	0	0	0	92	543	2906;2907;2908;2909	4156;4157;4158;4159	4156	192		4	29615000	0	79398000	0	0	0	0	0	0
501	GGSSGWSGGLAQNR	ARKAMAVEDIISRVRGGSSGWSGGLAQNRS	RGGSSGWSGGLAQNRSTITYRSWGRSLKYN	R	G	G	N	R	S	14	0	1332.62	P07357	P07357	425	438	C8A	Complement component C8 alpha chain	yes	yes	2	3.9689e-159	267.29	0	0	0	227650000	0	33599000	0	717770000	322170000	535	546	2919;2920;2921;2922;2923	4171;4172;4173;4174;4175;4176;4177;4178	4175	961		8	0	0	0	110960000	0	28914000	0	56095000	34964000
504	GHPQILEAAGNASAGTVLLR	EEAAEVLSIPEDTPRGHPQILEAAGNASAG	LEAAGNASAGTVLLRWLPPVPAERNGAIVK	R	G	H	L	R	W	20	0	1974.06	D6W633;Q13332	D6W633	930	949	PTPRS	Receptor-type tyrosine-protein phosphatase S	yes	no	3	2.7657e-08	118.37	3029800	0	0	10208000	0	0	0	23752000	0	465	549	2927;2928;2929	4182;4183;4184;4185	4183	818		3	3029800	0	0	4975600	0	0	0	1856300	0
505	GHTLTLNFTR	KENTSDPSLVIAFGRGHTLTLNFTRNATRY	IAFGRGHTLTLNFTRNATRYSVQLMSFVYN	R	G	H	T	R	N	10	0	1158.61	B3KRY3;A0A024RDY3;P11279;Q59FZ0	B3KRY3	75	84	LAMP1	Lysosome-associated membrane glycoprotein 1	yes	no	2;3	3.6786e-112	223.93	29088000	22108000	21248000	75458000	97348000	54496000	356820000	984830000	0	106	550	2930;2931;2932;2933;2934;2935;2936;2937;2938;2939;2940	4186;4187;4188;4189;4190;4191;4192;4193;4194;4195;4196;4197;4198	4198	231		12	29088000	18677000	22782000	36780000	118650000	46897000	46099000	76966000	0
506	GHTLVLNCTATTPLNTR	IDVQISTPRPVKLLRGHTLVLNCTATTPLN	TLVLNCTATTPLNTRVQMTWSYPDEKNKRA	R	G	H	T	R	V	17	0	1867.96	A0A1W2PNW4;L7RSL3;P17948	A0A1W2PNW4	245	261	FLT1	Receptor protein-tyrosine kinase;Vascular endothelial growth factor receptor 1	yes	no	3	1.3964e-15	151.1	10621000	13503000	9882400	0	0	0	0	108800000	0	218	551	2941;2942;2943;2944;2945	4199;4200;4201;4202;4203;4204;4205	4204	410		7	10621000	11407000	10596000	0	0	0	0	8502800	0
510	GINESYK	YRNHSIFLADINQERGINESYKKNLMALKK	LADINQERGINESYKKNLMALKKFVMVKFL	R	G	I	Y	K	K	7	0	809.392	E9PIA8;A0A286YFE3;A0A2C9F2P4;A0A286YFL8;A0A286YFF7;P50897;B4DWU3;Q5T0S4	E9PIA8	133	139	PPT1	Palmitoyl-protein thioesterase 1	yes	no	2	0.024841	108.24	0	0	0	0	0	0	0	0	185890000	226	555	2951	4213	4213	422		0	0	0	0	0	0	0	0	0	20174000
511	GINYNSSVAK	ISACNKDIYVDLDMKGINYNSSVAKSAQEC	DLDMKGINYNSSVAKSAQECQERCTDDVHC	K	G	I	A	K	S	10	0	1051.53	P03951;D6RB32	P03951	122	131	F11	Coagulation factor XI;Coagulation factor XIa heavy chain;Coagulation factor XIa light chain	yes	no	2	0.00324	111.39	0	0	0	44590000	14782000	24130000	318110000	0	286590000	527	556	2952;2953;2954;2955;2956;2957	4214;4215;4216;4217;4218;4219;4220;4221	4214	940		8	0	0	0	21735000	18017000	20766000	41097000	0	31103000
514	GLCVNASAVSR	______________________________	LDGRGLCVNASAVSRLRAYLLPAPPAPGNA	R	G	L	S	R	L	11	0	1132.57	B3KWK7;B3KTQ0;B4DP07;A6XNC9;A6XND1;B3KVF9;A6XND0;B4DN53;B3KRZ1;P17936	B3KWK7	15	25	IGFBP3	Insulin-like growth factor-binding protein 3	yes	no	2	0.00088161	117.31	0	0	0	111360000	0	0	0	0	0	291	559	2961	4225	4225	545		1	0	0	0	54280000	0	0	0	0	0
515	GLDGSLQTAAFSNLSSLFDSQWHK	IKINGQTQSVVFSYKGLDGSLQTAAFSNLS	AFSNLSSLFDSQWHKIMIGVERSSATLFVD	K	G	L	H	K	I	24	0	2608.26	A0A1B1SMR9;P20849	A0A1B1SMR9	159	182	COL9A1	Collagen alpha-1(IX) chain	yes	no	3	8.6169e-240	312.74	0	0	144970000	398270000	0	141370000	1617200000	901100000	0	212	560	2962;2963;2964;2965;2966;2967;2968	4226;4227;4228;4229;4230;4231;4232	4228	394		6	0	0	155440000	194130000	0	121660000	208930000	70423000	0
519	GLIVFENESYVLEPMK	YSDSAVSLSTCSGLRGLIVFENESYVLEPM	LIVFENESYVLEPMKSATNRYKLFPAKKLK	R	G	L	M	K	S	16	0	1866.94	Q5JRP2;A8K6G4;U5NE98;O43184	Q5JRP2	140	155	ADAM12	Disintegrin and metalloproteinase domain-containing protein 12	yes	no	2	0.0015986	79.82	0	0	0	0	0	0	0	0	0	301	564	2975	4239	4239	560		1	0	0	0	0	0	0	0	0	0
521	GLNLTEDTYKPR	LEFHTVPFQLLARYKGLNLTEDTYKPRIYT	RYKGLNLTEDTYKPRIYTSPTWSAFVTDSS	K	G	L	P	R	I	12	0	1405.72	B4DVE1;A0A0S2Z3Y1;Q08380;B4DI70;B4DWA8;B3KP88;B4DDG4	B4DVE1	384	395	LGALS3BP	Galectin-3-binding protein	yes	no	2;3	9.2373e-43	178.84	0	0	0	71608000	0	253240000	0	0	0	184	566	2988;2989;2990;2991;2992	4258;4259;4260;4261;4262	4262	357		5	0	0	0	34904000	0	217930000	0	0	0
523	GLNVTLSSTGR	ALSAYWIASHTTEERGLNVTLSSTGRNGFK	TEERGLNVTLSSTGRNGFKSHALQLNNRQI	R	G	L	G	R	N	11	0	1103.59	F5GXS0;A0A140TA49;A0A140TA44;A0A140TA32;A0A140TA29;A0A0G2JL54;A0A0G2JPR0;P0C0L5;P0C0L4;A0A3B3ISD7;B4DDH0;B4E344;A0A3B3ISA6	F5GXS0	1326	1336	C4B;C4A	Complement C4-B;Complement C4 beta chain;Complement C4-B alpha chain;C4a anaphylatoxin;C4b-B;C4d-B;Complement C4 gamma chain;Complement C4-A;Complement C4 beta chain;Complement C4-A alpha chain;C4a anaphylatoxin;C4b-A;C4d-A;Complement C4 gamma chain	yes	no	2	2.4303e-05	172.98	22551000	76215000	23453000	310120000	90869000	117090000	925690000	1504600000	963380000	170	568	2998;2999;3000;3001;3002;3003;3004;3005;3006	4271;4272;4273;4274;4275;4276;4277;4278;4279;4280;4281;4282;4283;4284;4285	4277	335		15	22551000	64387000	25146000	151160000	110750000	100770000	119590000	117590000	104550000
528	GLTFQQNASSMCVPDQDTAIR	DWLGQSMFTCRVDHRGLTFQQNASSMCVPD	NASSMCVPDQDTAIRVFAIPPSFASIFLTK	R	G	L	I	R	V	21	0	2338.07	P01871;A0A1B0GUU9;P0DOX6	P01871	203	223	IGHM	Ig mu chain C region	yes	no	2;3	0	439.77	0	25851000	5651400	322270000	0	17246000	644620000	844400000	787950000	521	573;574	3034;3035;3036;3037;3038;3039;3040;3041;3042;3043;3044	4325;4326;4327;4328;4329;4330;4331;4332;4333;4334;4335;4336;4337;4338;4339;4340;4341;4342	4328	929	99	18	0	21839000	6059400	157080000	0	14842000	83280000	65992000	85513000
530	GMCYFTNGTER	______________________________	YQFKGMCYFTNGTERVRLVSRSIYNREEVV	K	G	M	E	R	V	11	0	1334.54	Q29900;A0A0A7C769;A0A0A7C767;J7JLT4;A0A0A7C7I5;A0A0A7C7J6;A0A0A7C7L9;A0A0A7C7N9;A0A0A7C7C6;K7WRG9;L0BXP7;L0BX77;L0BX82;L0BX86;L0BX94;L0BX97;L0BXL3;L0BXN0;I7H3Z5;L0BXN3;L0BX28;A0A0A7C7N5;K7R1Q4;A0A0A7C7T1;A0A0A7C7T6;A0A0A7C7T7;A0A0A7C7Q6;A0A0A7C7G6;A0A0A7C7Q5;A0A0A7C7E0;I7EL85;A0A0A7C7H3;A0A0A7C798;A0A0A7C786;A0A0A7C782;A0A0A7C780;A0A0A7C775;I6X987;A0A0A7C7H9;L0BXQ0;F8LFY8;K7X4E3;L0BVU4;A0A0A7C7U1…	Q29900	14	24	HLA-DQB1;HLA-DQB1I;HLA-DQB;HLA-DQ3;HLA-DQB3;HLA-DRB3;DQB1*0603;HLA-DRB1;HLA-DQB2;HLA-DQ-beta;HLA-DQB1*06x;DQB1-02;DQB1;HLA-DQB1*06new1	HLA class II histocompatibility antigen, DQ beta 2 chain	yes	no	2	0.0042654	105.36	0	0	0	13596000	0	8613200	0	0	0	107	576	3048;3049	4348;4349	4348	234		2	0	0	0	6627000	0	7412300	0	0	0
531	GNATHDNICSGNSESTQK	KHTNCSVFGLLLTQKGNATHDNICSGNSES	THDNICSGNSESTQKCGIDVTLCEEAFFRF	K	G	N	Q	K	C	18	0	1918.81	O00300	O00300	177	194	TNFRSF11B	Tumor necrosis factor receptor superfamily member 11B	yes	yes	3	2.1173e-30	197.94	76222000	599270000	277770000	0	0	9605200	372830000	326290000	649910000	502	577;578	3050;3051;3052;3053;3054;3055;3056;3057;3058;3059;3060	4350;4351;4352;4353;4354;4355;4356;4357;4358;4359;4360;4361;4362	4353	880;881;882		13	76222000	506270000	297830000	0	0	8265900	48166000	25500000	70532000
532	GNDSEEEMR	SSTNANDITQSLTGKGNDSEEEMRFQEVFM	QSLTGKGNDSEEEMRFQEVFMEHMSNMEKR	K	G	N	M	R	F	9	0	1065.4	B4DDJ5;P21757	B4DDJ5	119	127	MSR1	Macrophage scavenger receptor types I and II	yes	no	2	0.017511	96.948	0	0	0	8445900	0	0	0	0	0	360	579	3061	4363	4363	653		1	0	0	0	4116800	0	0	0	0	0
533	GNESALWDCK	SAGSGRIWMDHVSCRGNESALWDCKHDGWG	HVSCRGNESALWDCKHDGWGKHSNCTHQQD	R	G	N	C	K	H	10	0	1178.5	F5GZZ9;C9JHR8;Q86VB7;D3DUU0;D3DUU2	F5GZZ9	110	119	CD163	Scavenger receptor cysteine-rich type 1 protein M130;Soluble CD163	yes	no	2	0.0083863	102.06	0	0	0	9868600	0	0	0	0	0	446	580	3062	4364	4364	790		1	0	0	0	4810300	0	0	0	0	0
534	GNFSTEGCGCVCEPGWK	PATGRLDTRPFCSGRGNFSTEGCGCVCEPG	FSTEGCGCVCEPGWKGPNCSEPECPGNCHL	R	G	N	W	K	G	17	0	1943.76	P24821;E9PC84;J3QSU6;A0A024R884;Q4LE33;A7MBN2;F5H7V9;D3YHM4;B4E1W8	P24821	165	181	TNC;TNC variant protein	Tenascin	yes	no	2;3	0	345.38	57568000	235880000	0	6269100000	183270000	1169900000	35736000000	749410000	31633000000	553	581	3063;3064;3065;3066;3067;3068;3069;3070;3071;3072;3073;3074;3075;3076;3077;3078;3079;3080;3081;3082	4365;4366;4367;4368;4369;4370;4371;4372;4373;4374;4375;4376;4377;4378;4379;4380;4381;4382;4383;4384;4385;4386;4387;4388;4389;4390;4391;4392;4393	4368	1000		29	57568000	199280000	0	3055700000	223380000	1006800000	4616800000	58568000	3433000000
535	GNGSRPSSPEEVK	EKRKDPKPRVKVVDRGNGSRPSSPEEVKFV	DRGNGSRPSSPEEVKFVCQTPAIADIVILV	R	G	N	V	K	F	13	0	1342.65	Q05707;Q4G0W3;A8KAL5	Q05707	136	148	COL14A1	Collagen alpha-1(XIV) chain	yes	no	2;3	0.0064188	89.403	0	0	0	0	100740000	0	0	572140000	0	572	582	3083;3084;3085	4394;4395;4396	4396	1052		3	0	0	0	0	122780000	0	0	44714000	0
536	GNITEYQCHQYITK	PVGKGYMVSCLVDHRGNITEYQCHQYITKM	RGNITEYQCHQYITKMTAIIFSDYRLICGF	R	G	N	T	K	M	14	0	1753.81	Q92896;H3BQU9;H3BM42;H3BQT1	Q92896	209	222	GLG1	Golgi apparatus protein 1	yes	no	3	0.00017771	118.13	0	0	0	37122000	16648000	24751000	0	0	0	647	583	3086;3087;3088;3089;3090	4397;4398;4399;4400;4401	4397	1209		5	0	0	0	18094000	20291000	21300000	0	0	0
537	GNLTYGYVTILNGSDIR	FSGDDTEDFVAGVPKGNLTYGYVTILNGSD	LTYGYVTILNGSDIRSLYNFSGEQMASYFG	K	G	N	I	R	S	17	0	1854.95	B2R627;A8K6A5;A0A024RB01;P08648	B2R627	296	312	ITGA5	Integrin alpha-5;Integrin alpha-5 heavy chain;Integrin alpha-5 light chain	yes	no	2	7.2831e-53	201.95	20455000	21402000	0	68412000	0	12638000	0	731830000	270380000	95	584	3091;3092;3093;3094;3095;3096;3097;3098;3099	4402;4403;4404;4405;4406;4407;4408;4409;4410;4411;4412	4409	199;200		11	20455000	18081000	0	33346000	0	10876000	0	57194000	29343000
538	GNPGEPGLNGTTGPK	GKKGERGFPGYPGPKGNPGEPGLNGTTGPK	GNPGEPGLNGTTGPKGIRGRRGNSGPPGIV	K	G	N	P	K	G	15	0	1394.68	D9ZGF2;P12111;E7ENL6;B7ZW00;Q59F25;Q8N4Z1	D9ZGF2	2323	2337	COL6A3	Collagen alpha-3(VI) chain	yes	no	2	6.1577e-15	182.92	0	34860000	0	1263600000	522910000	284510000	2254600000	2391500000	3436000000	468	585	3100;3101;3102;3103;3104;3105;3106;3107	4413;4414;4415;4416;4417;4418;4419;4420;4421;4422;4423;4424;4425;4426	4417	821		14	0	29450000	0	615940000	637320000	244840000	291270000	186900000	372890000
540	GNPYSDLGNHTTCR	TLSIFKVADFKNKSKGNPYSDLGNHTTCRY	KGNPYSDLGNHTTCRYRDFRYPPGHPQEYK	K	G	N	C	R	Y	14	0	1590.68	B4DZA5;Q4KMQ2	B4DZA5	794	807	ANO6	Anoctamin;Anoctamin-6	yes	no	2;3	2.6851e-09	144.1	0	0	0	24325000	14429000	14550000	0	0	0	401	587	3109;3110;3111;3112	4428;4429;4430;4431;4432;4433	4429	720		6	0	0	0	11857000	17586000	12522000	0	0	0
541	GNTTTLISENGHAADTLTATNFR	KVTCTKGSCQNSCEKGNTTTLISENGHAAD	ENGHAADTLTATNFRVVICHLPCMNGGQCS	K	G	N	F	R	V	23	0	2404.16	Q14766;C9JD84;E7EV71;B7ZLY3	Q14766	377	399	LTBP1	Latent-transforming growth factor beta-binding protein 1	yes	no	2;3	2.423e-40	178.53	0	0	0	70138000	0	0	0	0	0	582	588;589	3113;3114;3115;3116;3117;3118	4434;4435;4436;4437;4438;4439;4440	4437	1095;1096		7	0	0	0	34187000	0	0	0	0	0
542	GNVISSHGNPILLNSSIPEDPSIK	FGKYLGYLKIEFDERGNVISSHGNPILLNS	PILLNSSIPEDPSIKADINKWRIKLDNYST	R	G	N	I	K	A	24	0	2487.3	H0Y7R7;Q6NZX3;Q53Z63;B2RBH2;P21589	H0Y7R7	63	86	NT5E	5-nucleotidase	yes	no	2;3	1.7578e-151	279.5	0	74449000	32925000	168780000	57404000	59222000	897640000	997100000	1000400000	331	590	3119;3120;3121;3122;3123;3124;3125;3126;3127;3128;3129;3130;3131	4441;4442;4443;4444;4445;4446;4447;4448;4449;4450;4451;4452;4453;4454;4455;4456;4457;4458	4455	609		15	0	62895000	35302000	82268000	69964000	50965000	115970000	77926000	108570000
543	GNVTQHVQGHR	QLKALLNHLDVGVGRGNVTQHVQGHRNLS_	GVGRGNVTQHVQGHRNLS____________	R	G	N	H	R	N	11	0	1231.62	E5RFZ8;E5RGA7;E5RJ40;E5RJG5;E5RIP4;A0A0S2Z5C8;A0A0S2Z5B1;A0A0S2Z5Z7;A0A0S2Z534;Q15043	E5RFZ8	76	86	SLC39A14	Zinc transporter ZIP14	yes	no	2;3	5.3504e-202	252.82	0	31086000	35040000	139670000	185560000	100580000	617210000	0	0	187	591	3132;3133;3134;3135;3136;3137;3138;3139;3140;3141	4459;4460;4461;4462;4463;4464;4465;4466;4467;4468	4468	360		10	0	26262000	37570000	68078000	226160000	86558000	79738000	0	0
546	GPECSQNYTTPSGVIK	THGAGFSIRYEIFKRGPECSQNYTTPSGVI	PECSQNYTTPSGVIKSPGFPEKYPNSLECT	R	G	P	I	K	S	16	0	1736.8	Q6AWA9;Q5JWQ4;Q71SW6;E7EX60;Q9H2E1;Q5T7F0;Q59F20;Q6X907;E9PEP6;A8K9V7;Q68DN3;O14786	Q6AWA9	144	159	DKFZp686A03134;NRP1;DKFZp781F1414	Neuropilin-1	yes	no	2	7.1255e-284	342.43	0	0	0	32042000	0	0	0	0	0	310	594	3147	4474;4475	4475	577		2	0	0	0	15618000	0	0	0	0	0
548	GPGIKPNQTSK	RQLYEFDIKVPLLVRGPGIKPNQTSKRGAS	LLVRGPGIKPNQTSKRGASNLTWRSDVLVE	R	G	P	S	K	R	11	0	1125.61	H0YFA9;B4DTT0;Q7Z3X3;H7C3P4;A8K6V6;A0A024RBC5;F6S8M0;B4E284;P15586	H0YFA9	176	186	GNS;DKFZp686E12166	N-acetylglucosamine-6-sulfatase	yes	no	3	0.020612	67.08	0	0	0	5011800	0	7597100	0	0	0	97	596	3155;3156;3157	4483;4484;4485	4483	210		3	0	0	0	2442900	0	6537900	0	0	0
549	GPLSPGTGNATVGR	LLHSLFQDCERAEVRGPLSPGTGNATVGRV	RGPLSPGTGNATVGRVPVDDVWFALDTEYM	R	G	P	G	R	V	14	0	1282.66	Q6Q4G3	Q6Q4G3	160	173	AQPEP	Aminopeptidase Q	yes	yes	2	0.0049943	84.31	0	0	0	0	0	0	0	0	0	614	597	3158	4486	4486	1144		1	0	0	0	0	0	0	0	0	0
550	GPNCSEPECPGNCHLR	FSTEGCGCVCEPGWKGPNCSEPECPGNCHL	PNCSEPECPGNCHLRGRCIDGQCICDDGFT	K	G	P	L	R	G	16	0	1882.75	P24821;E9PC84;J3QSU6;A0A024R884;Q4LE33;A7MBN2;F5H7V9;D3YHM4;B4E1W8	P24821	182	197	TNC;TNC variant protein	Tenascin	yes	no	2;3	2.9313e-228	320.07	73245000	269850000	23753000	8620500000	3279100000	4136800000	34361000000	46217000000	27325000000	553	598	3159;3160;3161;3162;3163;3164;3165;3166;3167;3168;3169;3170;3171;3172;3173	4487;4488;4489;4490;4491;4492;4493;4494;4495;4496;4497;4498;4499;4500;4501;4502;4503;4504;4505;4506;4507;4508;4509	4497	1001		23	73245000	227970000	25468000	4201900000	3996600000	3560100000	4439100000	3612000000	2965500000
551	GPNLTSPASITFTTGLEAPR	LVLHTNYTATVRGLRGPNLTSPASITFTTG	SPASITFTTGLEAPRDLEAKEVTPRTALLT	R	G	P	P	R	D	20	0	2029.05	A0A3B3ISX9;A0A140T9C0;A0A140T902;A0A140T8Y3;A0A140TA52;A0A140TA41;A0A140TA33;P22105;B6RHJ5;Q6IPK3;A0A087X0I0;A0A140T9L7;A0A140T8Z8	A0A3B3ISX9	4165	4184	TNXB	Tenascin-X	yes	no	2;3	1.5505e-251	318.62	0	74699000	31800000	347550000	137600000	79337000	2112500000	1483100000	1401400000	259	599	3174;3175;3176;3177;3178;3179;3180;3181;3182;3183;3184	4510;4511;4512;4513;4514;4515;4516;4517;4518;4519;4520;4521;4522;4523;4524	4515	494		15	0	63106000	34096000	169410000	167700000	68275000	272920000	115910000	152090000
552	GPPGVNGTQGFQGCPGQR	GYRGYPGDEGGPGERGPPGVNGTQGFQGCP	GVNGTQGFQGCPGQRGVKGSRGFPGEKGEV	R	G	P	Q	R	G	18	0	1812.83	D9ZGF2;P12111;E7ENL6;B7ZW00;Q59F25	D9ZGF2	2074	2091	COL6A3	Collagen alpha-3(VI) chain	yes	no	2;3	0	445.76	19316000	77737000	45188000	3786200000	568860000	668180000	6321000000	5451400000	5203800000	468	600	3185;3186;3187;3188;3189;3190;3191;3192;3193;3194;3195;3196	4525;4526;4527;4528;4529;4530;4531;4532;4533;4534;4535;4536;4537;4538;4539;4540;4541;4542;4543;4544;4545	4526	822		20	19316000	65673000	48450000	1845500000	693330000	575020000	816610000	426040000	564750000
554	GPSTPLPEDPNWNVTEFHTTPK	IHPKDLTALSNMLPKGPSTPLPEDPNWNVT	EDPNWNVTEFHTTPKMSTYLLAFIVSEFDY	K	G	P	P	K	M	22	0	2463.17	A0A024RC61;Q59E93;P15144;H0YLZ8	A0A024RC61	253	274	ANPEP	Aminopeptidase N	yes	no	3	1.4794e-76	226.71	0	0	0	1104400000	47299000	180130000	875140000	2712100000	1822000000	99	602	3198;3199;3200;3201;3202;3203	4549;4550;4551;4552;4553;4554;4555;4556;4557;4558;4559;4560;4561;4562	4549	218		13	0	0	0	538310000	57649000	155020000	113060000	211960000	197730000
555	GPYTLQGLLGCELGPDNTSVPTAK	KEKLFLEAFKALGGKGPYTLQGLLGCELGP	GCELGPDNTSVPTAKFALNGEEFM______	K	G	P	A	K	F	24	0	2487.23	M0R266;M0R0H0;M0QYM4;M0R220;M0QYN1;M0QYN9;A0A1W6R2Z1;A0A1W6R2Y2;A0A024QZI2;P55899	M0R266	109	132	FCGRT;hCG_1998059	IgG receptor FcRn large subunit p51	yes	no	2	2.4364e-299	302.84	0	0	0	20497000	0	0	0	0	0	10	603	3204;3205	4563;4564	4564	13		2	0	0	0	9990700	0	0	0	0	0
556	GQFESVAPSQNFSDSSESDTHPFVIAK	VTTVPKDPEAAEARRGQFESVAPSQNFSDS	SDSSESDTHPFVIAKTELSTAVQPNESTET	R	G	Q	A	K	T	27	0	2910.33	D6RGZ6;A0A024RAL1;A0A024RAQ9;Q59FG9;P13611;B7Z638;Q6MZK8	D6RGZ6	445	471	VCAN;CSPG2;DKFZp686K06110	Versican core protein	yes	no	2;3	1.5397e-102	237.24	0	15914000	17543000	93983000	0	0	1418100000	2104500000	1856800000	93	604	3206;3207;3208;3209;3210;3211;3212;3213;3214;3215	4565;4566;4567;4568;4569;4570;4571;4572;4573;4574;4575;4576;4577;4578;4579;4580;4581	4574	196		17	0	13444000	18810000	45810000	0	0	183210000	164470000	201520000
557	GQPANQSVLLSIYDER	______________________________	QPANQSVLLSIYDERGARQLGLALGPALGL	R	G	Q	E	R	G	16	0	1788.9	Q59GD4;P25940	Q59GD4	11	26	COL5A3	Collagen alpha-3(V) chain	yes	no	2	4.4291e-73	251.91	0	0	0	28709000	0	0	28835000	102880000	0	554	605	3216;3217;3218	4582;4583;4584;4585	4585	1015		4	0	0	0	13994000	0	0	3725300	8040300	0
558	GQTAESLAVHNITVCEQK	FFIGLAIHGAERIVRGQTAESLAVHNITVC	AESLAVHNITVCEQKISEWGKIKECPIPQF	R	G	Q	Q	K	I	18	0	1983.97	B4DWE0;A0A0S2Z3S6;P04839	B4DWE0	198	215	CYBB	Cytochrome b-245 heavy chain	yes	no	3	1.9402e-33	159.19	0	0	0	0	0	0	0	0	0	183	606	3219;3220	4586;4587	4587	350		2	0	0	0	0	0	0	0	0	0
559	GQTEIQVNCPPAVTENK	WIASIFAFATCGGFKGQTEIQVNCPPAVTE	TEIQVNCPPAVTENKTVTATFGYPFRLNEA	K	G	Q	N	K	T	17	0	1883.9	A0A0U1RQT9;C9JYN0;A8K865;A4D0R1;Q16563	A0A0U1RQT9	16	32	SYPL1;SYPL	Synaptophysin-like protein 1	yes	no	2	3.8855e-21	178.22	13527000	26217000	22374000	0	0	0	0	0	0	189	607	3221;3222;3223	4588;4589;4590	4588	362		3	13527000	22148000	23989000	0	0	0	0	0	0
562	GSKDNATDSVPLR	IYWSDRTHANGSIKRGSKDNATDSVPLRTG	KRGSKDNATDSVPLRTGIGVQLKDIKVFNR	R	G	S	L	R	T	13	1	1358.68	Q07954	Q07954	2123	2135	LRP1	Prolow-density lipoprotein receptor-related protein 1;Low-density lipoprotein receptor-related protein 1 85 kDa subunit;Low-density lipoprotein receptor-related protein 1 515 kDa subunit;Low-density lipoprotein receptor-related protein 1 intracellular domain	yes	yes	2;3	1.421e-136	259.23	0	5907800	2986900	32288000	0	7142300	0	234740000	98780000	575	610	3226;3227;3228;3229;3230;3231;3232;3233	4594;4595;4596;4597;4598;4599;4600;4601	4598	1060		8	0	4991000	3202500	15738000	0	6146400	0	18346000	10720000
563	GSLSYLNVTR	GGELMLGGTDSKYYKGSLSYLNVTRKAYWQ	SKYYKGSLSYLNVTRKAYWQVHLDQ_____	K	G	S	T	R	K	10	0	1108.59	F8WD96;C9JH19;H7C469;A0A1B0GW44;A0A1B0GVP3;A0A1B0GV23;A0A1B0GVD5;A0A1B0GWE8;V9HWI3;A0A1B0GU92;A0A1B0GU03;P07339	F8WD96	257	266	CTSD;HEL-S-130P	Cathepsin D;Cathepsin D light chain;Cathepsin D heavy chain	yes	no	2	0.00092711	144.77	263440000	109840000	72957000	0	0	232780000	1015200000	1679000000	0	210	611	3234;3235;3236;3237;3238;3239	4602;4603;4604;4605;4606;4607;4608;4609;4610	4608	391		9	263440000	92796000	78225000	0	0	200320000	131160000	131220000	0
564	GSNGTICDNQR	______________________________	MATRGSNGTICDNQRDCQPGLCCAFQRGLL	R	G	S	Q	R	D	11	0	1220.52	Q8N294;E9PKW6;B3KS70;B4DI69;Q6PQ81;F6SYF8;B4DID6;Q9UBP4;O43532	Q8N294	5	15	DKK3	Dickkopf-related protein 3	yes	no	2	2.6511e-31	186.78	7963700	12014000	38926000	23016000	4935100	7838400	0	0	0	352	612	3240;3241;3242;3243;3244;3245;3246;3247	4611;4612;4613;4614;4615;4616;4617;4618;4619	4619	639		9	7963700	10149000	41737000	11219000	6014900	6745500	0	0	0
565	GSNYSEILDK	QWLEAEIIPDGWFSKGSNYSEILDKYFKNF	GWFSKGSNYSEILDKYFKNFDNGDSRLDSS	K	G	S	D	K	Y	10	0	1124.54	B4DTZ8;Q12841	B4DTZ8	85	94	FSTL1	Follistatin-related protein 1	yes	no	2	0.01314	92.051	0	0	0	35487000	0	0	0	333700000	0	392	613	3248;3249	4620;4621	4620	711		2	0	0	0	17297000	0	0	0	26079000	0
567	GSPGNGSSHSGAPGPDPTLAR	FHLTVAEPHAEPPPRGSPGNGSSHSGAPGP	SSHSGAPGPDPTLARGHNVINVIVPESRAH	R	G	S	A	R	G	21	0	1917.89	B4E385;A0A024R0A0;Q9BRK3	B4E385	280	300	MXRA8	Matrix-remodeling-associated protein 8	yes	no	3	2.1898e-16	142.23	0	0	0	64856000	0	0	0	194550000	0	18	615	3252;3253	4624;4625	4625	21		2	0	0	0	31613000	0	0	0	15204000	0
568	GSQWSDIEEFCNR	FVKIPGEKDSVICLKGSQWSDIEEFCNRSC	LKGSQWSDIEEFCNRSCEVPTRLQKRTFSI	K	G	S	N	R	S	13	0	1626.67	B4DPY4;H3BLV0;B2R658;A0A172WBW8;B1AP13;H7BY55;P08174	B4DPY4	84	96	CD55	Complement decay-accelerating factor	yes	no	2	1.1131e-297	347.76	16481000	100740000	56167000	218570000	0	0	1267000000	1724700000	1181900000	204	616	3254;3255;3256;3257;3258;3259;3260	4626;4627;4628;4629;4630;4631;4632;4633;4634;4635;4636;4637;4638;4639;4640	4639	384		15	16481000	85106000	60222000	106540000	0	0	163690000	134790000	128270000
569	GSSVILNCSAYSEPSPK	PFYFLVEPVDTLSVRGSSVILNCSAYSEPS	SVILNCSAYSEPSPKIEWKKDGTFLNLVSD	R	G	S	P	K	I	17	0	1794.85	Q92859	Q92859	67	83	NEO1	Neogenin	yes	yes	2	4.8475e-12	123.95	0	0	0	0	0	0	0	0	0	646	617	3261	4641	4641	1208		1	0	0	0	0	0	0	0	0	0
570	GTAGNALMDGASQLMGENR	QNEANKYQISVNKYRGTAGNALMDGASQLM	NALMDGASQLMGENRTMTIHNGMFFSTYDR	R	G	T	N	R	T	19	0	1891.85	D3DP13;B4E1D3;V9HVY1;P02675;D6REL8	D3DP13	230	248	FGB;HEL-S-78p	Fibrinogen beta chain;Fibrinopeptide B;Fibrinogen beta chain	yes	no	2	0	362.79	0	0	0	761350000	68210000	767710000	1113900000	1098300000	664950000	404	618;619;620	3262;3263;3264;3265;3266;3267;3268;3269;3270;3271;3272;3273;3274;3275;3276;3277;3278;3279;3280;3281;3282;3283	4642;4643;4644;4645;4646;4647;4648;4649;4650;4651;4652;4653;4654;4655;4656;4657;4658;4659;4660;4661;4662;4663;4664;4665;4666;4667;4668;4669;4670;4671;4672;4673;4674;4675;4676;4677	4672	726	73;74	36	0	0	0	371110000	83135000	660670000	143900000	85831000	72164000
571	GTANLSETIR	ICEVAHVTLQGDPLRGTANLSETIRVPPTL	GDPLRGTANLSETIRVPPTLEVTQQPVRAE	R	G	T	I	R	V	10	0	1060.55	H3BQ21;B4DP97;D3DVW9;Q5TFQ8;P78324	H3BQ21	79	88	SIRPB1;PTPNS1;SIRPA	Signal-regulatory protein beta-1 isoform 3;Tyrosine-protein phosphatase non-receptor type substrate 1	yes	no	2	0.00088608	148.52	0	8961000	0	8179200	0	0	0	0	0	385	621	3284;3285	4678;4679	4679	696		2	0	7570300	0	3986800	0	0	0	0	0
572	GTANTTTAGVPCQR	ATSVSCFRGKGEGYRGTANTTTAGVPCQRW	RGTANTTTAGVPCQRWDAQIPHQHRFTPEK	R	G	T	Q	R	W	14	0	1432.67	Q49A61;B7Z557;B7Z250;Q13208;Q53GN8;G3XAK1;P26927	Q49A61	156	169	MST1	Hepatocyte growth factor-like protein;Hepatocyte growth factor-like protein alpha chain;Hepatocyte growth factor-like protein beta chain	yes	no	2	4.3313e-169	298.84	0	7258100	3921600	39327000	8423300	8457100	104860000	255340000	177190000	417	622	3286;3287;3288;3289;3290;3291;3292;3293	4680;4681;4682;4683;4684;4685;4686;4687	4685	749		8	0	6131700	4204700	19169000	10266000	7278000	13547000	19955000	19229000
573	GTDPSLSPSPAALPPAPGTELSYLNGTFR	DRSCTEETHGFICQKGTDPSLSPSPAALPP	PAPGTELSYLNGTFRLLQKPLRWHDALLLC	K	G	T	F	R	L	29	0	2912.46	Q9UBG0	Q9UBG0	1110	1138	MRC2	C-type mannose receptor 2	yes	yes	2	5.0895e-65	177.4	0	0	0	46955000	0	0	0	125580000	0	665	623	3294;3295	4688;4689;4690;4691;4692	4690	1241		5	0	0	0	22887000	0	0	0	9814700	0
575	GTFTDCALANMTEQIR	ASFIKNLQGISSFRRGTFTDCALANMTEQI	TFTDCALANMTEQIRQDRSKGTVHFAVVIT	R	G	T	I	R	Q	16	0	1826.83	A0A384MDP3;P12110;C9JH44	A0A384MDP3	131	146	COL6A2	Collagen alpha-2(VI) chain	yes	no	2;3	0	387.96	3657200000	4099000000	2038000000	35020000000	5881700000	7964600000	77982000000	82119000000	85280000000	243	625;626	3298;3299;3300;3301;3302;3303;3304;3305;3306;3307;3308;3309;3310;3311;3312;3313;3314;3315;3316;3317;3318;3319;3320;3321;3322;3323;3324;3325;3326;3327;3328;3329;3330;3331;3332;3333;3334;3335;3336;3337;3338;3339;3340;3341;3342;3343;3344;3345;3346;3347;3348;3349;3350;3351;3352;3353;3354;3355;3356;3357;3358;3359;3360;3361;3362;3363;3364;3365;3366;3367;3368;3369;3370;3371;3372;3373;3374;3375;3376;3377…	4696;4697;4698;4699;4700;4701;4702;4703;4704;4705;4706;4707;4708;4709;4710;4711;4712;4713;4714;4715;4716;4717;4718;4719;4720;4721;4722;4723;4724;4725;4726;4727;4728;4729;4730;4731;4732;4733;4734;4735;4736;4737;4738;4739;4740;4741;4742;4743;4744;4745;4746;4747;4748;4749;4750;4751;4752;4753;4754;4755;4756;4757;4758;4759;4760;4761;4762;4763;4764;4765;4766;4767;4768;4769;4770;4771;4772;4773;4774;4775…	4760	450	49	166	3657200000	3462900000	2185100000	17070000000	7168700000	6854100000	10075000000	6417800000	9255200000
576	GTFTDCALANMTEQIRQDR	ASFIKNLQGISSFRRGTFTDCALANMTEQI	DCALANMTEQIRQDRSKGTVHFAVVITDGH	R	G	T	D	R	S	19	1	2226.02	A0A384MDP3;P12110;C9JH44	A0A384MDP3	131	149	COL6A2	Collagen alpha-2(VI) chain	yes	no	3	0.027641	51.348	0	0	0	0	0	0	0	0	0	243	627	3414	4868	4868	450		1	0	0	0	0	0	0	0	0	0
580	GVAVTNTSK	QETDSVVSSVTTKVKGVAVTNTSKLGFRIW	VTTKVKGVAVTNTSKLGFRIWDVADYVIPA	K	G	V	S	K	L	9	0	875.471	F6SFZ6;B7Z6W8;Q99571;B7Z1K8;H0YF70;B7Z1M5;F5GZQ9	F6SFZ6	70	78	P2RX4	P2X purinoceptor;P2X purinoceptor 4	yes	no	2	0.018948	94.114	0	0	0	7802200	0	0	0	29565000	17487000	428	631	3426;3427;3428	4883;4884;4885	4885	766		3	0	0	0	3803000	0	0	0	2310600	1897800
581	GVFITNETGQPLIGK	GPAGSYRPYDEGLRRGVFITNETGQPLIGK	GVFITNETGQPLIGKVWPGSTAFPDFTNPT	R	G	V	G	K	V	15	0	1572.85	A0A024R8Q1;P10253;B7Z5V6	A0A024R8Q1	465	479	GAA	Lysosomal alpha-glucosidase;76 kDa lysosomal alpha-glucosidase;70 kDa lysosomal alpha-glucosidase	yes	no	2	1.9969e-71	244.45	0	0	34611000	129530000	0	0	0	0	0	71	632	3429;3430	4886;4887	4887	120		2	0	0	37110000	63137000	0	0	0	0	0
583	GVLMVGNETTYEDGHGSR	KPLARRCFPAIHAYKGVLMVGNETTYEDGH	MVGNETTYEDGHGSRKNITDLVEGAKKANG	K	G	V	S	R	K	18	0	1920.86	A0A088QF11;A0A088QCU6;A0A024R798;A0A024R7D2;Q8IWA5;K7ESF5;K7EPV6	A0A088QF11	179	196	SLC44A2	Choline transporter-like protein 2	yes	no	2;3	9.4725e-80	193.15	117130000	50245000	0	187330000	0	124960000	402860000	2035300000	293730000	56	634;635	3432;3433;3434;3435;3436;3437;3438;3439;3440;3441;3442;3443;3444;3445;3446;3447;3448;3449;3450;3451	4889;4890;4891;4892;4893;4894;4895;4896;4897;4898;4899;4900;4901;4902;4903;4904;4905;4906;4907;4908;4909;4910	4905	93	5	18	117130000	42448000	0	91311000	0	107540000	52045000	159060000	31877000
585	GVNASAVVNVTVR	FSSSHDHFRVLALARGVNASAVVNVTVRAL	ARGVNASAVVNVTVRALLHVWAGGPWPQGA	R	G	V	V	R	A	13	0	1284.71	Q6UVK1;A2VCL1	Q6UVK1	2032	2044	CSPG4	Chondroitin sulfate proteoglycan 4	yes	no	2	5.1017e-22	210.35	101030000	36760000	35654000	19130000	0	20743000	0	0	0	615	637	3455;3456;3457;3458;3459;3460;3461	4915;4916;4917;4918;4919;4920;4921;4922	4917	1147;1148		8	101030000	31055000	38228000	9324600	0	17851000	0	0	0
586	GVNFNVSK	ISACHRDIYKGVDMRGVNFNVSKVSSVEEC	YKGVDMRGVNFNVSKVSSVEECQKRCTSNI	R	G	V	S	K	V	8	0	863.45	E9PBC5;B4DMX2;A8K9A9;H0YAC1;P03952;C9JCT1;C9J075	E9PBC5	85	92	KLKB1	Plasma kallikrein;Plasma kallikrein heavy chain;Plasma kallikrein light chain	yes	no	2	0.010053	113.14	0	0	0	26890000	0	0	0	0	0	308	638	3462	4923	4923	573		1	0	0	0	13107000	0	0	0	0	0
587	GVNVTMPAQPGTPPLSSTQLQIDPSLHEFQLVDLSR	RDQIRLRFDQPDDFKGVNVTMPAQPGTPPL	IDPSLHEFQLVDLSRRFLVHDSFWALPEQF	K	G	V	S	R	R	36	0	3871.98	A0A024RAB6;P98160	A0A024RAB6	507	542	HSPG2	Basement membrane-specific heparan sulfate proteoglycan core protein;Endorepellin;LG3 peptide	yes	no	3;4	1.2939e-148	247.36	434850000	339080000	227840000	699090000	122400000	338080000	1221100000	3204900000	3312900000	89	639;640	3463;3464;3465;3466;3467;3468;3469;3470;3471;3472;3473;3474;3475;3476;3477;3478	4924;4925;4926;4927;4928;4929;4930;4931;4932;4933;4934;4935;4936;4937;4938;4939;4940;4941;4942;4943;4944;4945;4946;4947;4948;4949;4950;4951	4924	180	12	28	434850000	286460000	244290000	340760000	149180000	290940000	157760000	250470000	359540000
589	GVTHLNISGLK	APPTTSNRHRRQIDRGVTHLNISGLKMPRG	QIDRGVTHLNISGLKMPRGIAIDWVAGNVY	R	G	V	L	K	M	11	0	1137.65	Q07954;Q59FG2	Q07954	3948	3958	LRP1	Prolow-density lipoprotein receptor-related protein 1;Low-density lipoprotein receptor-related protein 1 85 kDa subunit;Low-density lipoprotein receptor-related protein 1 515 kDa subunit;Low-density lipoprotein receptor-related protein 1 intracellular domain	yes	no	2;3	9.1544e-41	208.33	10941000	33208000	0	75193000	0	0	0	562410000	365370000	575	642	3480;3481;3482;3483;3484;3485;3486;3487;3488;3489	4953;4954;4955;4956;4957;4958;4959;4960;4961;4962	4959	1066		10	10941000	28054000	0	36651000	0	0	0	43954000	39652000
591	GVVTDEQGIPIANATISVSGINHGVK	EALLTFMEQVHRGIKGVVTDEQGIPIANAT	ANATISVSGINHGVKTASGGDYWRILNPGE	K	G	V	V	K	T	26	0	2575.36	Q8IUX7;B3KR36;B4DJB3	Q8IUX7	910	935	AEBP1	Adipocyte enhancer-binding protein 1	yes	no	2;3	7.1613e-116	247.64	49775000	45279000	19552000	1926000000	438370000	987360000	3555300000	7774300000	6772100000	629	644	3491;3492;3493;3494;3495;3496;3497;3498;3499;3500;3501;3502;3503	4964;4965;4966;4967;4968;4969;4970;4971;4972;4973;4974;4975;4976;4977;4978;4979;4980;4981;4982;4983;4984;4985;4986;4987;4988	4969	1177		25	49775000	38252000	20964000	938780000	534290000	849690000	459310000	607580000	734950000
593	GWQAEEGPLFHNQTSVTVDGR	PTGLRGQALLKVWGRGWQAEEGPLFHNQTS	GPLFHNQTSVTVDGRGASVFIQTDKPVYRP	R	G	W	G	R	G	21	0	2327.09	Q8IZJ3;Q6NVW5;F8W7D1	Q8IZJ3	106	126	CPAMD8	C3 and PZP-like alpha-2-macroglobulin domain-containing protein 8	yes	no	3	2.0403e-15	139.98	0	0	28268000	0	0	0	0	0	0	635	646	3505;3506	4990;4991;4992;4993;4994	4993	1193		5	0	0	30309000	0	0	0	0	0	0
594	GYAGNHCETK	VRGDVFPSYTCTCLKGYAGNHCETKCVEPL	CTCLKGYAGNHCETKCVEPLGMENGNIANS	K	G	Y	T	K	C	10	0	1135.47	B3KTQ2;A0A024RC55;Q08431;X6R3G6;A0A024RC59;H0YKS8	B3KTQ2	52	61	MFGE8	Lactadherin;Lactadherin short form;Medin	yes	no	2;3	7.3135e-10	200.6	0	0	0	48763000	127160000	108940000	309400000	165750000	164770000	98	647	3507;3508;3509;3510;3511;3512;3513;3514;3515	4995;4996;4997;4998;4999;5000;5001;5002;5003	5001	213		8	0	0	0	23768000	154990000	93755000	39972000	12954000	17881000
595	GYCLASNGSHSCTCK	ETVSDPCFSSPCGGRGYCLASNGSHSCTCK	GYCLASNGSHSCTCKVGYTGEDCAKELFPP	R	G	Y	C	K	V	15	0	1700.67	B5MEF5;Q8TER0	B5MEF5	115	129	SNED1	Sushi, nidogen and EGF-like domain-containing protein 1	yes	no	2;3	4.1756e-27	156.36	0	0	0	11608000	6537400	6216900	64054000	0	0	415	648	3516;3517;3518;3519;3520	5004;5005;5006;5007;5008;5009	5009	742		6	0	0	0	5658000	7967800	5350100	8275100	0	0
596	GYHKNSSQRHSISAMPK	PTTPGVPMTSLERQRGYHKNSSQRHSISAM	HKNSSQRHSISAMPKNLNSPNGVLLSRQPS	R	G	Y	P	K	N	17	2	1926.95	Q9H9K4;Q9H9G5;A0A185QE25;A8K1W7;Q8NFY4	Q9H9K4	341	357	SEMA6D	Semaphorin-6D	yes	no	2	0.01494	81.017	0	0	0	26716000	0	0	0	0	0	206	649	3521;3522;3523	5010;5011;5012	5012	387	38	3	0	0	0	13022000	0	0	0	0	0
597	GYYNQSEAGSHTVQR	KAHSQTHRVDLGTLRGYYNQSEAGSHTVQR	GYYNQSEAGSHTVQRMYGCDVGSDWRFLRG	R	G	Y	Q	R	M	15	0	1695.76	Q2HQJ5;G9HW33;G1EPD4;G1EPD9;G1EPF2;G1EPG8;G1EPH1;G1EP13;G0KXG7;G1EPB0;G1EP04;F6KRP5;F8R100;F8R109;F8R111;F8R124;F8R128;F8R132;F8R133;F6KRP3;F8R8G5;G1EPB9;F8R8G4;G1EPA8;G1EP81;G9HW61;G9HW66;G9HW71;G9HW77;G9I2I9;G9I2J4;G1EPH3;G1EPA6;G1EPA5;G1EPA1;G1EP84;G1EP86;G1EP87;G1EP90;G1EP91;G1EP92;G1EP94;G1EPG9;F8R8I5;F8R8I8;F8SKT2;F2X614;F6KRL0;F6KRL2;F6KRL3;F6KRL5;F6KRM0;F6KRN0;F2X606;F2X5Z7;F2X5Y6;F2X5Z8;…	Q2HQJ5	82	96	HLA-A;HLA;HLA-A2;HLA-A*0225;HLA-B;HLA-A*02;HLA-A*0226;MHC class I HLA-A;HLA-C	HLA class I histocompatibility antigen, A-2 alpha chain;HLA class I histocompatibility antigen, A-69 alpha chain	yes	no	2;3	6.2633e-228	322.58	10230000	0	11645000	236300000	89137000	21410000	68556000	0	437900000	4	650	3524;3525;3526;3527;3528;3529;3530;3531	5013;5014;5015;5016;5017;5018;5019;5020;5021;5022;5023;5024	5016	4		12	10230000	0	12485000	115180000	108640000	18424000	8856800	0	47524000
598	GYYNQSEAR	KRQAQTDRVSLRNLRGYYNQSEARSHIIQR	SLRNLRGYYNQSEARSHIIQRMYGCDVGPD	R	G	Y	A	R	S	9	0	1086.47	V5NQS1;G1EQC2;A0A0K0KR97;H9C5J0;H9C5H7;H9BQ95;A0A0K0KRK8;H8WR61;H6V7S2;H6V7S1;H6V082;I7AY96;G1EQ73;I6NS41;G1EQA3;F8R8K6;F8R8K5;F8R8K4;F6KS03;F6KRV3;A0A0X7YJ25;F8RHH5;A0A109NRE5;I6NS46;I6MHI2;I6TF04;D6ML98;G1EQK7;A0A0F7RNH7;A0A110AZI3;E3Q0X7;A0A0K0KSD4;G9I2M2;G9HWA4;G9HW59;G3D6G1;G3D6D4;G3D6C1;I7API5;D5FZQ8;G1EQK6;G1EQJ7;G1EQG1;G1EQF4;G1EQF0;A0A0K0KS97;A0A2U7NGY5;H2DMK1;H6A2F9;G3D6C0;A0A0B5CZ67;A0…	V5NQS1	107	115	HLA-C;HLA-B;HLA-Cw*03;HLA-Cw		yes	no	2	0.0018539	132.57	0	0	0	33343000	0	0	0	0	0	109	651	3532	5025;5026	5025	235		2	0	0	0	16252000	0	0	0	0	0
599	HAELSFVFLTDGVTGNDSLHESAHSMR	AINAIVRSPRGGARRHAELSFVFLTDGVTG	VTGNDSLHESAHSMRKQNVVPTVLALGSDV	R	H	A	M	R	K	27	0	2956.38	A0A384MDP3;P12110;Q9BUM6;Q7LCA7;Q6FHW5	A0A384MDP3	939	965	COL6A2	Collagen alpha-2(VI) chain	yes	no	3;4	9.1658e-165	274.11	84990000	289880000	66664000	1102800000	56270000	222690000	742830000	1339900000	341940000	243	652;653	3533;3534;3535;3536;3537;3538;3539;3540;3541;3542;3543;3544;3545;3546;3547;3548;3549;3550;3551;3552;3553;3554;3555;3556;3557;3558;3559;3560;3561;3562;3563;3564;3565;3566;3567;3568;3569;3570;3571;3572	5027;5028;5029;5030;5031;5032;5033;5034;5035;5036;5037;5038;5039;5040;5041;5042;5043;5044;5045;5046;5047;5048;5049;5050;5051;5052;5053;5054;5055;5056;5057;5058;5059;5060;5061;5062;5063;5064;5065;5066;5067;5068;5069;5070;5071;5072;5073;5074;5075;5076;5077;5078;5079;5080;5081;5082;5083;5084;5085;5086;5087;5088;5089;5090;5091;5092;5093	5072	451	50	63	84990000	244890000	71477000	537530000	68583000	191640000	95967000	104720000	37110000
600	HAFFEGLNWENIR	RERRLGQNGIEDFKKHAFFEGLNWENIRNL	KKHAFFEGLNWENIRNLEAPYIPDVSSPSD	K	H	A	I	R	N	13	0	1631.78	Q86XZ8;A0A024R6N2;Q9Y5S2	Q86XZ8	339	351	CDC42BPB	Non-specific serine/threonine protein kinase;Serine/threonine-protein kinase MRCK beta	yes	no	2	0.019913	74.684	0	0	0	6642100	0	0	0	0	0	53	654	3573	5094	5094	88		1	0	0	0	3237600	0	0	0	0	0
601	HANWTLTPLK	YIAELLAHKIHVYEKHANWTLTPLKSLDFN	HVYEKHANWTLTPLKSLDFNTLVDNISVDP	K	H	A	L	K	S	10	0	1179.64	B4DX19;P27169	B4DX19	251	260	PON1	Serum paraoxonase/arylesterase 1	yes	no	2	4.1141e-22	218.47	0	0	0	104820000	0	25425000	178320000	356310000	337480000	398	655	3574;3575;3576;3577;3578	5095;5096;5097;5098;5099;5100	5095	716		6	0	0	0	51091000	0	21880000	23037000	27847000	36626000
603	HECHFFNGTER	______________________________	EQVKHECHFFNGTERVRFLDRAGAVPGQIL	K	H	E	E	R	V	11	0	1432.59	A0T4C3;R4L8Z3;Q9TQ46;Q9TQ45;Q9TQ44;Q9TQ43;Q9MYD7;Q9MYA1;S4T6M6;U3UA21;Q95IF0;Q95HL4;Q8WLU0;Q8SNC3;Q8SNB5;Q8MH61;Q860V5;Q860S8;Q860E1;V5JAA0;V5NR41;V6BNZ6;V9N2U6;W0HE91;W0NT93;R9WRN8;W0NTG8;S4T6U9;S4T6R2;S4T6R1;Q9GJ28;Q7YPZ5;Q7YQ30;Q9TQ47;U5IT82;M9PAJ3;S0F2C4;I6MHJ8;I6M558;I3TBB6;H9C8Y0;H8WV64;H8WV63;H8WV62;G9HWD1;H8WV60;H8WV59;H8WV58;H8WV57;H8WUJ3;H6VQN9;H2E2A7;H2DML5;H2BDT9;S4T6M5;M4YNP5;M9PA05;…	A0T4C3	8	18	HLA-DRB1;HLA-DR4I;HLA;HLA-DRB4;DRB1*0405V3;HLA-DR4;HLA-DR-beta 1;HLA-DBR1;HLA-DRBI;HLA-DRB;HLA-DRB1*04	HLA class II histocompatibility antigen, DRB1-4 beta chain	yes	no	2;3	3.1252e-26	220.81	0	0	0	210020000	0	70327000	0	0	0	1	657	3581;3582;3583	5104;5105;5106;5107;5108	5104	1		5	0	0	0	102370000	0	60522000	0	0	0
605	HENTSSSPIQYEFSLTR	ALLLTVDQSLRLDCRHENTSSSPIQYEFSL	NTSSSPIQYEFSLTRETKKHVLFGTVGVPE	R	H	E	T	R	E	17	0	1994.93	J3QRJ3;Q59GA0;E9PIM6;B0YJA4;E9PNQ8;P04216	J3QRJ3	23	39	THY1	Thy-1 membrane glycoprotein	yes	no	2;3	0	479.73	0	0	0	395300000	65348000	109500000	360470000	2546100000	173750000	317	661	3694;3695;3696;3697;3698;3699;3700;3701	5303;5304;5305;5306;5307;5308;5309;5310;5311;5312;5313;5314;5315	5311	588		12	0	0	0	192680000	79646000	94236000	46569000	198980000	18857000
607	HFFNVTDEAALK	FLNEIKYIASDPDDKHFFNVTDEAALKDIV	DDKHFFNVTDEAALKDIVDALGDRIFSLEG	K	H	F	L	K	D	12	0	1390.69	A8K8T0;Q9UKX5;B4E3M0;B3KTN6	A8K8T0	328	339	ITGA11	Integrin alpha-11	yes	no	2	2.6825e-53	180.88	0	0	0	0	0	0	0	0	0	307	663	3704	5318	5318	571		1	0	0	0	0	0	0	0	0	0
609	HGIQYFNNNTQHSSLFMLNEVK	HPISTQSPDLEPILRHGIQYFNNNTQHSSL	NNTQHSSLFMLNEVKRAQRQVVAGLNFRIT	R	H	G	V	K	R	22	0	2620.25	B4DPP8;P01042	B4DPP8	150	171	KNG1	Kininogen-1;Kininogen-1 heavy chain;T-kinin;Bradykinin;Lysyl-bradykinin;Kininogen-1 light chain;Low molecular weight growth-promoting factor	yes	no	3	1.8342e-150	276.77	0	0	0	29251000	0	0	0	0	0	386	665	3706	5321	5321	697		1	0	0	0	14258000	0	0	0	0	0
610	HGIQYFNNNTQHSSLFTLNEVK	YEILRGYPDLEPILRHGIQYFNNNTQHSSL	NNTQHSSLFTLNEVKRAQRQVVAGLNFRIT	R	H	G	V	K	R	22	0	2590.26	Q05CF8;D3DNU8;B4E1C2	Q05CF8	26	47	KNG1		yes	no	3;4	0	441.81	0	50544000	20658000	65348000	0	64209000	129070000	372870000	495230000	403	666	3707;3708;3709;3710;3711;3712;3713;3714;3715;3716	5322;5323;5324;5325;5326;5327;5328;5329;5330;5331;5332;5333	5330	722;723;724		11	0	42700000	22149000	31852000	0	55256000	16674000	29140000	53745000
611	HGLESASDHHGNFSITMR	GGHQAANTSHDLAQRHGLESASDHHGNFSI	ESASDHHGNFSITMRNLTLLDSGLYCCLVV	R	H	G	M	R	N	18	0	1994.9	Q2TA85;Q9H7M9	Q2TA85	113	130	C10orf54	Platelet receptor Gi24	yes	no	4	4.4007e-08	125.86	0	0	0	9561300	0	0	0	0	0	588	667	3717	5334;5335	5334	1103		2	0	0	0	4660500	0	0	0	0	0
613	HGVIISSTVDTYENGSSVEYR	RKESKGMCTSPPLIKHGVIISSTVDTYENG	STVDTYENGSSVEYRCFDHHFLEGSREAYC	K	H	G	Y	R	C	21	0	2312.09	A0A3B3IS66;P05160	A0A3B3IS66	117	137	F13B	Coagulation factor XIII B chain	yes	no	3	4.3079e-35	193.19	0	0	0	15082000	0	0	0	0	0	257	669	3719	5338	5338	490		1	0	0	0	7351400	0	0	0	0	0
614	HIADLAGNSEVILPVPAFNVINGGSHAGNK	VCKAGAVEKGVPLYRHIADLAGNSEVILPV	PAFNVINGGSHAGNKLAMQEFMILPVGAAN	R	H	I	N	K	L	30	0	3010.56	A0A2R8Y6G6;A0A024R4F1;P06733;E2DRY6;A0A2R8YEM5;K7EM90;A4UCS8	A0A2R8Y6G6	133	162	ENO1	Alpha-enolase;Enolase	yes	no	3	1.7107e-20	101.73	0	0	0	0	0	0	0	0	0	37	670	3720	5339	5339	62;63		1	0	0	0	0	0	0	0	0	0
615	HIEVNGSK	CKVYSDPQPHIQWLKHIEVNGSKIGPDNLP	PHIQWLKHIEVNGSKIGPDNLPYVQILKTA	K	H	I	S	K	I	8	0	882.456	B5A959;A0A0S2Z3P8;A0A0S2Z3P4;D3DSX4;A0A0S2Z3T4;A0A0S2Z3T9;A0A3B3ISD1;A0A0S2Z3Q6;A0A1B0RPQ4;P11362;E9PN14;B5A958;Q53G05;C1KBH7;E7EU09	B5A959	203	210	FGFR1	Fibroblast growth factor receptor 1;Fibroblast growth factor receptor	yes	no	2	0.003258	168.27	0	0	0	19084000	16722000	12029000	0	0	0	182	671	3721;3722;3723	5340;5341;5342	5340	349		3	0	0	0	9302100	20381000	10352000	0	0	0
616	HIGHANLTFEQLR	KIIQDIDLCENSVQRHIGHANLTFEQLRSL	QRHIGHANLTFEQLRSLMESLPGKKVGAED	R	H	I	L	R	S	13	0	1534.8	O00300	O00300	284	296	TNFRSF11B	Tumor necrosis factor receptor superfamily member 11B	yes	yes	2;3;4	1.1291e-82	245.15	773060000	2888100000	876490000	245710000	48525000	46601000	1393100000	2453500000	3797200000	502	672	3724;3725;3726;3727;3728;3729;3730;3731;3732;3733;3734;3735;3736;3737;3738;3739;3740;3741;3742;3743	5343;5344;5345;5346;5347;5348;5349;5350;5351;5352;5353;5354;5355;5356;5357;5358;5359;5360;5361;5362;5363;5364;5365;5366;5367;5368;5369;5370;5371;5372;5373;5374;5375;5376	5369	883		31	773060000	2439900000	939770000	119770000	59143000	40103000	179980000	191740000	412100000
618	HIPGLIHNMTAR	MGHLCGNQRVLTKHKHIPGLIHNMTARCCD	KHKHIPGLIHNMTARCCDLPFPEQACCAEE	K	H	I	A	R	C	12	0	1358.72	Q16610;A0A140VJI7	Q16610	437	448	ECM1	Extracellular matrix protein 1	yes	no	2;3	3.4267e-06	171.67	0	39318000	6664600	140820000	26031000	92702000	368640000	948310000	695520000	194	674;675	3746;3747;3748;3749;3750;3751;3752;3753;3754;3755;3756	5380;5381;5382;5383;5384;5385;5386;5387;5388;5389;5390;5391;5392;5393	5386	368	35	14	0	33217000	7145800	68641000	31727000	79776000	47625000	74112000	75482000
620	HLNASNPTEPATIIFTAAR	QSSFLWQRGRKFLQKHLNASNPTEPATIIF	SNPTEPATIIFTAAREGRETLKCLSHHVAD	K	H	L	A	R	E	19	0	2023.05	A0A024R957;Q8NFQ8	A0A024R957	284	302	TOR1AIP2	Torsin-1A-interacting protein 2	yes	no	3	1.0758e-07	102.89	0	0	0	6877400	0	0	0	0	0	78	677	3760;3761	5399;5400	5400	132		2	0	0	0	3352200	0	0	0	0	0
621	HLNGTITAK	EVTLQTPLYCSMNSKHLNGTITAKYTYGKP	CSMNSKHLNGTITAKYTYGKPVKGDVTLTF	K	H	L	A	K	Y	9	0	953.529	Q6YHK3	Q6YHK3	245	253	CD109	CD109 antigen	yes	yes	2	0.0018802	171.56	0	61778000	44365000	249960000	302440000	117130000	600400000	1836600000	693820000	619	678	3762;3763;3764;3765;3766;3767;3768;3769;3770	5401;5402;5403;5404;5405;5406;5407;5408;5409;5410	5401	1158		10	0	52191000	47568000	121840000	368620000	100800000	77567000	143540000	75298000
622	HLNSTDDADR	FARHLREVGDEFRSRHLNSTDDADRIPFQE	EFRSRHLNSTDDADRIPFQEDWMKMKVKLG	R	H	L	D	R	I	10	0	1142.5	A0A0C4DGX7;H7C2T5;A8K3W7;Q9Y2G5	A0A0C4DGX7	18	27	POFUT2	GDP-fucose protein O-fucosyltransferase 2	yes	no	2	6.1322e-53	245.5	0	15525000	16632000	0	26496000	6786800	425320000	1021700000	0	165	679	3771;3772;3773;3774;3775;3776;3777	5411;5412;5413;5414;5415;5416;5417	5416	326		7	0	13115000	17832000	0	32293000	5840500	54947000	79849000	0
625	HMNETSHTQGSLR	PVPNMYWDVGNLVSKHMNETSHTQGSLRIT	SKHMNETSHTQGSLRITNISSDDSGKQISC	K	H	M	L	R	I	13	0	1496.68	S5MD53;Q5VWE5;Q548C2;A0A024R230;Q16620	S5MD53	27	39	NTRK2	Tyrosine-protein kinase receptor;BDNF/NT-3 growth factors receptor	yes	no	3	8.2053e-05	126.09	0	0	0	7687200	7530600	0	0	0	0	25	682	3782;3783;3784	5422;5423;5424	5422	33		3	0	0	0	3747000	9178300	0	0	0	0
626	HMPWNITR	VRGAPCEAVRIPMCRHMPWNITRMPNHLHH	VRIPMCRHMPWNITRMPNHLHHSTQENAMY	R	H	M	T	R	M	8	0	1053.52	B4E1T4;Q6FHJ7	B4E1T4	56	63	SFRP4	Secreted frizzled-related protein 4	yes	no	2	0.017806	102.41	14553000	0	0	63962000	0	0	176780000	380880000	249850000	406	683	3785;3786;3787;3788;3789	5425;5426;5427;5428;5429	5426	731		5	14553000	0	0	31177000	0	0	22838000	29767000	27115000
627	HNFSHCCSK	VLQEKICAMEGLPQKHNFSHCCSKVDAQRR	EGLPQKHNFSHCCSKVDAQRRLCFFYNKKS	K	H	N	S	K	V	9	0	1175.46	P43652	P43652	108	116	AFM	Afamin	yes	yes	3	0.0037524	109.66	0	0	0	12045000	0	0	0	0	0	560	684	3790	5430	5430	1023		1	0	0	0	5871000	0	0	0	0	0
628	HNNDTQHIWESDSNEFSVIADPR	YSAFLVADKVIVTSKHNNDTQHIWESDSNE	WESDSNEFSVIADPRGNTLGRGTTITLVLK	K	H	N	P	R	G	23	0	2710.2	Q59FC6;Q5CAQ5;V9HWP2;P14625;Q96GW1;A0A1W2PRR1	Q59FC6	241	263	TRA1;HEL-S-125m;HSP90B1	Endoplasmin	yes	no	2;3;4	6.1613e-239	311.92	0	138870000	103360000	454490000	0	0	634620000	1257500000	723600000	547	685	3791;3792;3793;3794;3795;3796;3797;3798;3799;3800;3801;3802;3803;3804;3805;3806	5431;5432;5433;5434;5435;5436;5437;5438;5439;5440;5441;5442;5443;5444;5445;5446;5447;5448;5449;5450;5451;5452;5453;5454;5455;5456;5457;5458;5459;5460	5452	987;988		28	0	117320000	110830000	221530000	0	0	81988000	98279000	78529000
629	HNSTGCLR	IREGDDDRTVCREIRHNSTGCLRMKDQCDK	TVCREIRHNSTGCLRMKDQCDKCREILSVD	R	H	N	L	R	M	8	0	943.429	A0A384NKS6;P10909;E7ETB4;B4DW11;H0YC35;CON__P17697	A0A384NKS6	342	349	CLU	Clusterin;Clusterin beta chain;Clusterin alpha chain;Clusterin	yes	no	1;2	3.8476e-39	234.91	107760000000	2523700000	44505000000	15579000000	25036000000	16109000000	2322000000	77858000000	534770000	250	686	3807;3808;3809;3810;3811;3812;3813;3814;3815;3816;3817;3818;3819;3820;3821;3822;3823;3824;3825	5461;5462;5463;5464;5465;5466;5467;5468;5469;5470;5471;5472;5473;5474;5475;5476;5477;5478;5479;5480;5481;5482;5483;5484;5485;5486	5475	471		24	107760000000	2132000000	47718000000	7593700000	30513000000	13863000000	299990000	6084800000	58036000
630	HNSTGCLRMK	IREGDDDRTVCREIRHNSTGCLRMKDQCDK	CREIRHNSTGCLRMKDQCDKCREILSVDCS	R	H	N	M	K	D	10	1	1202.56	A0A384NKS6;P10909;E7ETB4;B4DW11;H0YC35;CON__P17697	A0A384NKS6	342	351	CLU	Clusterin;Clusterin beta chain;Clusterin alpha chain;Clusterin	yes	no	3	0.00080438	153.95	35417000	53806000	17886000	0	0	0	0	0	0	250	687;688	3826;3827;3828;3829	5487;5488;5489;5490	5488	471	56	4	35417000	45456000	19177000	0	0	0	0	0	0
631	HNSTIDVGGQK	VIQWLKRVEYGAEGRHNSTIDVGGQKFVVL	AEGRHNSTIDVGGQKFVVLPTGDVWSRPDG	R	H	N	Q	K	F	11	0	1154.57	A0PJ49;Q6ZMD4;Q8N441	A0PJ49	103	113	FGFRL1	Fibroblast growth factor receptor-like 1	yes	no	2	1.1737e-154	283.82	0	10669000	8788600	7191800	0	0	37568000	79554000	0	264	689	3830;3831;3832;3833;3834;3835	5491;5492;5493;5494;5495;5496	5496	503		6	0	9013100	9423200	3505500	0	0	4853400	6217300	0
632	HPDFRLFACMNPATDVGK	SLVLLDRGDTEPLVRHPDFRLFACMNPATD	FRLFACMNPATDVGKRNLPPGIRNRFTELY	R	H	P	G	K	R	18	1	2074.97	Q5T795;Q9NU22	Q5T795	801	818	MDN1	Midasin	yes	no	2	0.0042399	80.979	0	45955000	0	8996600	0	0	0	0	0	600	690	3836;3837	5497;5498;5499	5498	1124	113	3	0	38823000	0	4385200	0	0	0	0	0
634	HPFTGDNCTIK	GTCINGRTSFTCACRHPFTGDNCTIKLVEE	CACRHPFTGDNCTIKLVEENALAPDFSKGS	R	H	P	I	K	L	11	0	1288.59	B7Z7R8;E7EPG1;Q13201	B7Z7R8	811	821	MMRN1	Multimerin-1;Platelet glycoprotein Ia*;155 kDa platelet multimerin	yes	no	2	3.4579e-05	136.96	0	0	0	0	0	0	0	27792000	0	429	692	3851	5516	5516	767		1	0	0	0	0	0	0	0	2172000	0
635	HPGNFSSLSCDYFAVNQSR	RVTAPPEAEYSGLVRHPGNFSSLSCDYFAV	FSSLSCDYFAVNQSRLLVCDLGNPMKAGAS	R	H	P	S	R	L	19	0	2184.96	B2R627;A8K6A5;A0A024RB01;P08648	B2R627	709	727	ITGA5	Integrin alpha-5;Integrin alpha-5 heavy chain;Integrin alpha-5 light chain	yes	no	2;3	0	429.74	16213000	15481000	13153000	46517000	14617000	26983000	140770000	435980000	154320000	95	693	3852;3853;3854;3855;3856;3857;3858;3859;3860;3861;3862	5517;5518;5519;5520;5521;5522;5523;5524;5525;5526;5527;5528;5529;5530;5531;5532;5533	5530	201;202		16	16213000	13078000	14103000	22674000	17815000	23221000	18186000	34073000	16748000
636	HPSTLQLPHLGFYVANGSGLSPSAR	LGPYLEFLVLRHRYRHPSTLQLPHLGFYVA	GFYVANGSGLSPSARGLIGQFQHADIRLVT	R	H	P	A	R	G	25	0	2605.34	Q6UXX5	Q6UXX5	1216	1240	ITIH6	Inter-alpha-trypsin inhibitor heavy chain H6	yes	yes	3	0.0095349	49.266	0	0	0	0	0	0	0	0	0	617	694	3863;3864	5534;5535	5535	1154		2	0	0	0	0	0	0	0	0	0
639	HQLYIDETVNSNIPTNLR	DNENVVNEYSSELEKHQLYIDETVNSNIPT	YIDETVNSNIPTNLRVLRSILENLRSKIQK	K	H	Q	L	R	V	18	0	2126.08	D3DP13;B4E1D3;V9HVY1;P02675	D3DP13	32	49	FGB;HEL-S-78p	Fibrinogen beta chain;Fibrinopeptide B;Fibrinogen beta chain	yes	no	2;3	1.0222e-247	297.97	0	0	0	270820000	0	51577000	0	0	0	404	697;698	3871;3872;3873;3874	5542;5543;5544;5545;5546;5547;5548	5548	727		6	0	0	0	132010000	0	44386000	0	0	0
641	HSHNNNSSDLHPHK	SSCQHATFGTNGAQRHSHNNNSSDLHPHKH	RHSHNNNSSDLHPHKHHSHEQHPHGHHPHA	R	H	S	H	K	H	14	0	1622.73	P04196;Q68DR3	P04196	340	353	HRG;DKFZp779H1622	Histidine-rich glycoprotein	yes	no	3;4	3.1974e-13	192.54	0	26088000	0	38635000	105780000	0	0	0	0	530	700	3876;3877;3878;3879;3880;3881	5551;5552;5553;5554;5555;5556	5556	943;944;945		5	0	22039000	0	18832000	128920000	0	0	0	0
642	HSNCTHQQDAGVTCSDGSNLEMR	NESALWDCKHDGWGKHSNCTHQQDAGVTCS	DAGVTCSDGSNLEMRLTRGGNMCSGRIEIK	K	H	S	M	R	L	23	0	2603.05	F5GZZ9;C9JHR8;Q86VB7;D3DUU0;D3DUU2	F5GZZ9	126	148	CD163	Scavenger receptor cysteine-rich type 1 protein M130;Soluble CD163	yes	no	3	2.3709e-08	115.55	0	0	0	8029200	0	0	0	0	0	446	701	3882	5557	5557	791		1	0	0	0	3913700	0	0	0	0	0
643	HTACQHNSSDSNCDDR	CPGRCMGRAVRMQQRHTACQHNSSDSNCDD	TACQHNSSDSNCDDRKRPTLRRNCTSGACD	R	H	T	D	R	K	16	0	1902.7	P82987	P82987	1568	1583	ADAMTSL3	ADAMTS-like protein 3	yes	yes	3	0.0075487	65.225	0	0	0	0	0	0	0	0	0	567	702	3883	5558	5558	1044		1	0	0	0	0	0	0	0	0	0
644	HTAEYAANITK	NSGKPLTIYVQPEQKHTAEYAANITKSVFD	PEQKHTAEYAANITKSVFDYFEEYFAMNYS	K	H	T	T	K	S	11	0	1217.6	B2R8K9;B0BCZ7;B0BCZ6;B0BCZ5;B0BCZ4;B0BCZ2;B0BCZ1;B0BCZ0;B0BCY9;B0BCY8;B0BCY7;Q07075;B0BCZ3	B2R8K9	317	327	ENPEP	Glutamyl aminopeptidase	yes	no	2	5.2204e-30	176.95	0	0	0	42158000	25317000	31805000	0	0	85190000	315	703	3884;3885;3886;3887;3888	5559;5560;5561;5562;5563;5564;5565	5564	583		7	0	0	0	20549000	30857000	27371000	0	0	9245300
645	HTDDLTSLNNTLANIR	NLNEVRTTCTDTLTKHTDDLTSLNNTLANI	TDDLTSLNNTLANIRLDSVSLRMQQDLMRS	K	H	T	I	R	L	16	0	1796.9	Q5KU26	Q5KU26	378	393	COLEC12	Collectin-12	yes	yes	2;3	0	372.73	0	0	0	30667000	0	0	226120000	0	0	599	704	3889;3890;3891;3892;3893	5566;5567;5568;5569;5570;5571	5570	1122		6	0	0	0	14948000	0	0	29213000	0	0
647	HTGNVVITNCSAAHSR	QTFIFTDGEDEALARHTGNVVITNCSAAHS	TGNVVITNCSAAHSRQALSCKMAVEYDRFI	R	H	T	S	R	Q	16	0	1722.82	A0A087X191;Q8NES3	A0A087X191	28	43	LFNG	Beta-1,3-N-acetylglucosaminyltransferase lunatic fringe	yes	no	3	3.1884e-20	180.64	22419000	57735000	0	0	0	4619300	26156000	0	0	143	706	3896;3897;3898;3899;3900	5575;5576;5577;5578;5579;5580;5581	5577	280		7	22419000	48775000	0	0	0	3975300	3379200	0	0
648	HTNCSVFGLLLTQK	GFFSNETSSKAPCRKHTNCSVFGLLLTQKG	KHTNCSVFGLLLTQKGNATHDNICSGNSES	K	H	T	Q	K	G	14	0	1616.83	O00300	O00300	163	176	TNFRSF11B	Tumor necrosis factor receptor superfamily member 11B	yes	yes	2;3	1.5015e-298	350.02	32421000	62808000	22645000	0	0	0	0	0	0	502	707	3901;3902;3903;3904;3905	5582;5583;5584;5585;5586	5583	884		5	32421000	53061000	24280000	0	0	0	0	0	0
649	HVNEINATIYLLK	KSGVLSVSSGAAAHRHVNEINATIYLLKTK	HRHVNEINATIYLLKTKLSERENQYALRKI	R	H	V	L	K	T	13	0	1526.85	B7Z938;Q5D044;H0UI49;A0A0A0MTC7;A0A0A0MQS9;Q16363;H0Y351;H0YAQ5;E5RFQ2	B7Z938	310	322	LAMA4	Laminin subunit alpha-4	yes	no	2;3	6.4761e-31	221.8	0	0	0	25909000	10740000	22485000	0	0	0	148	708	3906;3907;3908;3909;3910	5587;5588;5589;5590;5591;5592	5587	299		6	0	0	0	12629000	13090000	19350000	0	0	0
651	HVYNNLTEEQK	DNEGNQKVVITYSSRHVYNNLTEEQKGRVA	YSSRHVYNNLTEEQKGRVAFASNFLAGDAS	R	H	V	Q	K	G	11	0	1373.66	B4E3S3;Q9H6B4	B4E3S3	70	80	CLMP	CXADR-like membrane protein	yes	no	2	2.3491e-80	217.45	0	0	0	28780000	0	5371700	0	0	0	412	710	3914;3915;3916	5596;5597;5598	5598	739;740		3	0	0	0	14028000	0	4622800	0	0	0
652	HYHSIEVFTHYDLLTLNGSK	PKTGRDSWVWHQCHRHYHSIEVFTHYDLLT	EVFTHYDLLTLNGSKVAEGHKASFCLEDTN	R	H	Y	S	K	V	20	0	2373.18	Q96JB6	Q96JB6	613	632	LOXL4	Lysyl oxidase homolog 4	yes	yes	4	0.00098208	97.384	0	0	0	0	0	26069000	0	0	0	650	711	3917	5599	5599	1214		1	0	0	0	0	0	22434000	0	0	0
653	HYHSMEVFTHYDLLNLNGTK	PKNGRHAWIWHDCHRHYHSMEVFTHYDLLN	EVFTHYDLLNLNGTKVAEGHKASFCLEDTE	R	H	Y	T	K	V	20	0	2418.14	B4DDQ4;W6I206;W8QRJ0;Q9Y4K0	B4DDQ4	256	275	LOXL2	Lysyl oxidase homolog 2	yes	no	4	6.0461e-31	180.05	0	0	0	13609000	0	0	0	0	0	362	712	3918	5600	5600	657		1	0	0	0	6633600	0	0	0	0	0
655	HYTNSSQDVTVPCR	ATQCPDGKSVTCHVKHYTNSSQDVTVPCRV	KHYTNSSQDVTVPCRVPPPPPCCHPRLSLH	K	H	Y	C	R	V	14	0	1662.74	A0A286YEY5;P0DOX2;Q6N041;Q6N091;P01877	A0A286YEY5	89	102	DKFZp686O16217;DKFZp686C02220;IGHA2	Ig alpha-2 chain C region	yes	no	2;3	4.9444e-148	295.32	0	33741000	0	46909000	9323400	0	0	863990000	594260000	225	714	3920;3921;3922;3923;3924;3925	5602;5603;5604;5605;5606;5607	5603	420		6	0	28505000	0	22865000	11363000	0	0	67523000	64493000
656	IADTNITSIPQGLPPSLTELHLDGNK	ENGAFQGMKKLSYIRIADTNITSIPQGLPP	GLPPSLTELHLDGNKISRVDAASLKGLNNL	R	I	A	N	K	I	26	0	2743.44	Q6FH10;P07585	Q6FH10	207	232	DCN	Decorin	yes	no	2;3;4	2.863e-154	260.09	81035000000	57304000000	35534000000	43545000000	0	1783400000	292970000000	302930000000	124450000000	536	715;716	3926;3927;3928;3929;3930;3931;3932;3933;3934;3935;3936;3937;3938;3939;3940;3941;3942;3943;3944;3945;3946;3947;3948;3949;3950;3951;3952;3953;3954;3955;3956;3957;3958;3959;3960;3961;3962;3963;3964;3965;3966;3967;3968;3969;3970;3971;3972;3973;3974;3975;3976;3977;3978;3979;3980	5608;5609;5610;5611;5612;5613;5614;5615;5616;5617;5618;5619;5620;5621;5622;5623;5624;5625;5626;5627;5628;5629;5630;5631;5632;5633;5634;5635;5636;5637;5638;5639;5640;5641;5642;5643;5644;5645;5646;5647;5648;5649;5650;5651;5652;5653;5654;5655;5656;5657;5658;5659;5660;5661;5662;5663;5664;5665;5666;5667;5668;5669;5670;5671;5672;5673;5674;5675;5676;5677;5678;5679;5680;5681;5682;5683;5684;5685;5686;5687…	5709	962;963		99	81035000000	48411000000	38099000000	21225000000	0	1534700000	37850000000	23675000000	13506000000
658	IANETR	QPKSAAFLLRERYWKIANETRYPHSVAKSQ	FLLRERYWKIANETRYPHSVAKSQCLENSL	K	I	A	T	R	Y	6	0	702.366	P08236;B2R6X2;B4DTH9	P08236	629	634	GUSB	Beta-glucuronidase	yes	no	1;2	0.014139	111.28	0	32520000	0	0	0	0	0	0	253750000	322	718	3985;3986	5719;5720	5719	592		0	0	27473000	0	0	0	0	0	0	27539000
659	IANISGDGQK	ATITSFVGLKAIKNKIANISGDGQKWWIRI	AIKNKIANISGDGQKWWIRISEWPIDDHFT	K	I	A	Q	K	W	10	0	1001.51	Q59H44;O60449	Q59H44	481	490	LY75	Lymphocyte antigen 75	yes	no	2	3.6505e-05	125.98	0	0	0	5111400	0	0	0	0	0	511	719	3987;3988	5721;5722	5722	903		2	0	0	0	2491500	0	0	0	0	0
660	IAPASNVSHTVVLRPLK	DFGIVSGMLNVKWDRIAPASNVSHTVVLRP	PASNVSHTVVLRPLKAGYFNFTSATITYLA	R	I	A	L	K	A	17	0	1801.06	E9PJ35;Q6MZE4;E9PQI4;B4DUJ9;P43308	E9PJ35	83	99	SSR2;DKFZp686F19123	Translocon-associated protein subunit beta	yes	no	3;4	2.8401e-20	151.9	0	37033000	9849400	157410000	171260000	119710000	0	709090000	0	394	720	3989;3990;3991;3992;3993;3994;3995;3996	5723;5724;5725;5726;5727;5728;5729;5730;5731;5732;5733;5734	5728	712		12	0	31286000	10561000	76724000	208730000	103020000	0	55417000	0
662	IASNSATAFR	FAVGVRNIDSEEVGKIASNSATAFRVGNVQ	EEVGKIASNSATAFRVGNVQELSELSEQVL	K	I	A	F	R	V	10	0	1036.53	D9ZGF2;P12111;E7ENL6;B7ZW00;B4E0A4;Q59F25	D9ZGF2	1789	1798	COL6A3	Collagen alpha-3(VI) chain	yes	no	2	0.00031106	171.73	6487500	0	0	345810000	111330000	109570000	487610000	989000000	777520000	468	722;723	4006;4007;4008;4009;4010;4011;4012;4013;4014	5747;5748;5749;5750;5751;5752;5753;5754;5755;5756;5757;5758;5759;5760	5750	823		14	6487500	0	0	168560000	135690000	94295000	62995000	77293000	84382000
663	ICDLLVANNHFAHFFAPQNLTNMNK	LNGHFKVTYDVSRDKICDLLVANNHFAHFF	FAHFFAPQNLTNMNKNVVFVIDISGSMRGQ	K	I	C	N	K	N	25	0	2928.42	B7Z539;B7Z549;P19827	B7Z539	267	291	ITIH1	Inter-alpha-trypsin inhibitor heavy chain H1	yes	no	4	1.1574e-10	123.14	0	0	0	0	0	0	0	514140000	303400000	422	724	4015;4016	5761;5762	5761	755		2	0	0	0	0	0	0	0	40181000	32927000
664	ICNQNSSNPNQR	VEHVPGQPVRNPQCRICNQNSSNPNQRHPI	QCRICNQNSSNPNQRHPITNAIDGKNTWWQ	R	I	C	Q	R	H	12	0	1430.63	A0A087WYF1;A0A087WX80;P24043	A0A087WYF1	85	96	LAMA2	Laminin subunit alpha-2	yes	no	2	3.1983e-114	220.39	0	0	0	7361100	0	0	0	0	0	133	725	4017;4018	5763;5764	5764	257		2	0	0	0	3588000	0	0	0	0	0
665	IDGGPVILLQAGTPHNLTCR	TLSDTFSQVPPEDTRIDGGPVILLQAGTPH	VILLQAGTPHNLTCRAFNAKPAATIIWFRD	R	I	D	C	R	A	20	0	2131.12	B4DN67;Q96J84	B4DN67	25	44	KIRREL	Kin of IRRE-like protein 1	yes	no	3	0.0020835	77.221	0	0	0	4623400	0	0	0	0	0	378	726	4019	5765	5765	684		1	0	0	0	2253600	0	0	0	0	0
666	IDHLTNNR	RGAQDMDNNGKEESKIDHLTNNRNDLISKE	NGKEESKIDHLTNNRNDLISKEEQNSSSLL	K	I	D	N	R	N	8	0	981.499	H0Y7Y8;H7C5R6;A0A024R3V1;A0A024R3R1;Q4LE39	H0Y7Y8	138	145	ARID4B	AT-rich interactive domain-containing protein 4B	yes	no	2	0.0035273	134.66	1406200000	2254000000	1905700000	1574300000	1598100000	552140000	4604100000	5457300000	5380800000	32	727	4020;4021;4022;4023;4024;4025;4026;4027;4028;4029;4030;4031;4032;4033;4034;4035;4036;4037;4038;4039;4040;4041;4042;4043;4044;4045;4046;4047;4048;4049;4050;4051;4052;4053	5766;5767;5768;5769;5770;5771;5772;5773;5774;5775;5776;5777;5778;5779;5780;5781;5782;5783;5784;5785;5786;5787;5788;5789;5790;5791;5792;5793;5794;5795;5796;5797;5798;5799;5800;5801;5802;5803;5804;5805;5806;5807;5808;5809;5810;5811;5812;5813;5814	5780	44;45		49	1406200000	1904200000	2043300000	767350000	1947700000	475160000	594800000	426500000	583960000
672	IETILLNGTDR	IPAGRLYWVDAFYDRIETILLNGTDRKIVY	FYDRIETILLNGTDRKIVYEGPELNHAFGL	R	I	E	D	R	K	11	0	1243.68	Q07954	Q07954	723	733	LRP1	Prolow-density lipoprotein receptor-related protein 1;Low-density lipoprotein receptor-related protein 1 85 kDa subunit;Low-density lipoprotein receptor-related protein 1 515 kDa subunit;Low-density lipoprotein receptor-related protein 1 intracellular domain	yes	yes	2	5.949e-18	207.83	45685000	56357000	37408000	267020000	18429000	61161000	1707500000	2519200000	1957700000	575	733	4080;4081;4082;4083;4084;4085;4086;4087;4088	5852;5853;5854;5855;5856;5857;5858;5859;5860;5861;5862	5859	1067		11	45685000	47611000	40109000	130150000	22461000	52633000	220600000	196880000	212460000
673	IEVLHRPENCSK	TAQRQKKEESTEEVKIEVLHRPENCSKTSK	EVKIEVLHRPENCSKTSKKGDLLNAHYDGY	K	I	E	S	K	T	12	0	1480.75	F8WCU2;F8WBF2;F8WE12;B4DRE2;D3DPF8;Q9Y680	F8WCU2	37	48	FKBP7	Peptidyl-prolyl cis-trans isomerase;Peptidyl-prolyl cis-trans isomerase FKBP7	yes	no	3;4	3.592e-06	148.13	21631000	33084000	17999000	122680000	77789000	75504000	291580000	1025800000	465660000	388	734	4089;4090;4091;4092;4093;4094;4095;4096;4097;4098	5863;5864;5865;5866;5867;5868;5869;5870;5871;5872;5873;5874;5875;5876;5877;5878;5879;5880	5878	701		17	21631000	27950000	19299000	59798000	94810000	64976000	37669000	80172000	50536000
674	IFIFNQTGIEAK	MARFNHTDRTLETLKIFIFNQTGIEAKKNV	TLKIFIFNQTGIEAKKNVVVTQADQIGPLP	K	I	F	A	K	K	12	0	1379.74	H0Y928;B4DS52;H0Y997;Q7Z345;Q96J42	H0Y928	44	55	TXNDC15;DKFZp686L0872	Thioredoxin domain-containing protein 15	yes	no	2	0.0047541	104.22	0	0	0	0	0	0	0	39870000	0	389	735	4099;4100	5881;5882	5881	702		2	0	0	0	0	0	0	0	3115900	0
675	IGDENCDPECNHTLTGHDGGDCR	SLRRRLILANCDISKIGDENCDPECNHTLT	ECNHTLTGHDGGDCRHLRHPAFVKKQHNGV	K	I	G	C	R	H	23	0	2628	Q13219;A0A024R842	Q13219	419	441	PAPPA	Pappalysin-1	yes	no	4	0.013705	52.483	0	0	0	6753800	0	0	0	0	0	65	736	4101	5883	5883	110		1	0	0	0	3292000	0	0	0	0	0
677	IGPGEPLELLCNVSGALPPAGR	LSSQLAVTVGPGERRIGPGEPLELLCNVSG	ELLCNVSGALPPAGRHAAYSVGWEMAPAGA	R	I	G	G	R	H	22	0	2216.16	Q969P0	Q969P0	316	337	IGSF8	Immunoglobulin superfamily member 8	yes	yes	3	0.002488	77.847	0	0	0	6507400	0	0	0	0	0	648	738	4105	5888	5888	1212		1	0	0	0	3171900	0	0	0	0	0
678	IGYSNNGSDWK	GGKHRENKVFMRKFKIGYSNNGSDWKMIMD	RKFKIGYSNNGSDWKMIMDDSKRKAK____	K	I	G	W	K	M	11	0	1239.55	Q6AWA9;Q5JWQ4;Q71SW6;E7EX60;Q9H2E1;Q5T7F0;Q59F20;Q6X907;E9PEP6;A8K9V7;Q68DN3;O14786;V9GYL7;Q5JWQ6	Q6AWA9	517	527	DKFZp686A03134;NRP1;DKFZp781F1414	Neuropilin-1	yes	no	2	1.5083e-21	182.39	0	0	0	19512000	0	0	0	0	0	310	739	4106;4107	5889;5890	5890	578		2	0	0	0	9510900	0	0	0	0	0
680	IHNVTASDSGK	SILRDGITAGKAALRIHNVTASDSGKYLCY	AALRIHNVTASDSGKYLCYFQDGDFYEKAL	R	I	H	G	K	Y	11	0	1127.56	C9JNZ3;A8K4B5;Q53FK5;A0A024R042;A8K6Q7;Q53FI5;B4DQ62;A0A089GIA6;A8K547;E9PRX1;A0A024QZZ1;B2R753;C9JUV8;C9JQT8;C9JZT5;E9PRR1;E9PJE9;C9J877;C9J3Q8;C9JVU4;P78409;P78410;O00481;O00478	C9JNZ3	71	81	BTN3A3;BTN3A2;BT3.3;BTN3A1	Butyrophilin subfamily 3 member A2;Butyrophilin subfamily 3 member A1;Butyrophilin subfamily 3 member A3	yes	no	2;3	0.0001125	123.79	0	0	0	16148000	0	0	19596000	0	0	14	741	4113;4114;4115;4116	5897;5898;5899;5900	5897	19		4	0	0	0	7870800	0	0	2531700	0	0
681	IHQNITYQVCR	YSLTFGAINQTWSYRIHQNITYQVCRHAPR	WSYRIHQNITYQVCRHAPRHPSFPTTQQLN	R	I	H	C	R	H	11	0	1430.71	Q8IV28;A0A087WZP6;Q5CZI2;Q14112;H0YJV3	Q8IV28	294	304	NID2;DKFZp686D12108	Nidogen-2	yes	no	2;3	3.4437e-102	278.02	33518000	83258000	59347000	277270000	198940000	390660000	691840000	2272600000	913460000	137	742	4117;4118;4119;4120;4121;4122;4123;4124;4125;4126;4127	5901;5902;5903;5904;5905;5906;5907;5908;5909;5910;5911;5912;5913;5914;5915;5916;5917;5918;5919	5919	265		19	33518000	70337000	63633000	135150000	242470000	336190000	89380000	177610000	99135000
682	IHYLYLQNNFITELPVESFQNATGLR	CDSRNLRKVPVIPPRIHYLYLQNNFITELP	TELPVESFQNATGLRWINLDNNRIRKIDQR	R	I	H	L	R	W	26	0	3079.58	P51888	P51888	104	129	PRELP	Prolargin	yes	yes	2;3;4	0	332.39	38783000000	62221000000	34985000000	14786000000	1929400000	2299900000	6173700000	11795000000	9733400000	563	743;744;745;746	4128;4129;4130;4131;4132;4133;4134;4135;4136;4137;4138;4139;4140;4141;4142;4143;4144;4145;4146;4147;4148;4149;4150;4151;4152;4153;4154;4155;4156;4157;4158;4159;4160;4161;4162;4163;4164;4165;4166;4167;4168;4169;4170;4171;4172;4173;4174;4175;4176;4177;4178;4179;4180;4181;4182;4183;4184;4185;4186;4187;4188;4189;4190;4191;4192;4193;4194;4195;4196;4197;4198;4199;4200;4201;4202;4203;4204;4205;4206;4207…	5920;5921;5922;5923;5924;5925;5926;5927;5928;5929;5930;5931;5932;5933;5934;5935;5936;5937;5938;5939;5940;5941;5942;5943;5944;5945;5946;5947;5948;5949;5950;5951;5952;5953;5954;5955;5956;5957;5958;5959;5960;5961;5962;5963;5964;5965;5966;5967;5968;5969;5970;5971;5972;5973;5974;5975;5976;5977;5978;5979;5980;5981;5982;5983;5984;5985;5986;5987;5988;5989;5990;5991;5992;5993;5994;5995;5996;5997;5998;5999…	6019	1026;1027;1028		151	38783000000	52564000000	37511000000	7207200000	2351600000	1979200000	797590000	921790000	1056300000
684	IHYLYLQSNFITELPVESFQNATGLR	CDSRNLRKVPVIPPRIHYLYLQSNFITELP	TELPVESFQNATGLRWINLDNNRIRKIDQR	R	I	H	L	R	W	26	0	3052.57	Q6FHG6	Q6FHG6	104	129	PRELP		yes	yes	2;3	3.156e-12	95.71	0	0	0	0	0	0	0	0	0	607	748	4210;4211;4212;4213;4214;4215;4216;4217;4218	6081;6082;6083;6084;6085;6086;6087;6088;6089	6085	1137;1138		9	0	0	0	0	0	0	0	0	0
687	IIFANVSVR	LWTHLDFHLEFHGDRIIFANVSVRDVKPHS	EFHGDRIIFANVSVRDVKPHSLDGLRPDEF	R	I	I	V	R	D	9	0	1017.6	E9PNW2;E9PJC4;E9PQY7;E9PS99;E9PL78;E9PJM1;G3V1B9;E9PMQ9;A8K7U5;E9PSI1;B7Z6C9;O15321	E9PNW2	87	95	TM9SF1	Transmembrane 9 superfamily member 1	yes	no	2	0.025131	81.548	0	0	0	8889200	0	0	0	0	0	305	751	4221;4222	6092;6093	6092	566		2	0	0	0	4332900	0	0	0	0	0
688	IILNFTSLDLYR	HMHCVWRISVTPGEKIILNFTSLDLYRSRL	GEKIILNFTSLDLYRSRLCWYDYVEVRDGF	K	I	I	Y	R	S	12	0	1466.81	Q59F71;A5PLK9;P13497	Q59F71	433	444	BMP1	Metalloendopeptidase;Bone morphogenetic protein 1	yes	no	2	6.6833e-06	163.88	16640000	14491000	15228000	26447000	0	0	0	0	0	283	752	4223;4224;4225;4226	6094;6095;6096;6097	6094	528		4	16640000	12242000	16327000	12891000	0	0	0	0	0
689	IINDLANTSHVYMLPNGTLSIPK	AIPEAHLSWILPNRRIINDLANTSHVYMLP	SHVYMLPNGTLSIPKVQVSDSGYYRCVAVN	R	I	I	P	K	V	23	0	2510.32	Q9NR99	Q9NR99	618	640	MXRA5	Matrix-remodeling-associated protein 5	yes	yes	3	1.5583e-31	153.94	0	0	0	57906000	17960000	25381000	0	279870000	0	662	753	4227;4228;4229;4230	6098;6099;6100;6101;6102;6103;6104;6105;6106;6107	6099	1228;1229		10	0	0	0	28225000	21889000	21842000	0	21873000	0
691	IITVSTNGSIHSPR	SNKEQNGVQDPQHERIITVSTNGSIHSPRF	RIITVSTNGSIHSPRFPHTYPRNTVLVWRL	R	I	I	P	R	F	14	0	1480.8	B2R9K6;Q9NRA1	B2R9K6	49	62	PDGFC	Platelet-derived growth factor C;Platelet-derived growth factor C, latent form;Platelet-derived growth factor C, receptor-binding form	yes	no	3	1.3761e-05	120.53	0	0	0	0	0	0	198600000	0	0	327	756	4237;4238	6118;6119	6119	600		2	0	0	0	0	0	0	25658000	0	0
692	IIYGVENSSTFLECSPK	DLHHDNHHGHSPEERIIYGVENSSTFLECS	YGVENSSTFLECSPKSQRALVYWQFQRRNE	R	I	I	P	K	S	17	0	1942.93	Q75MQ2;Q14563	Q75MQ2	100	116	SEMA3A	Semaphorin-3A	yes	no	2	9.9349e-21	176.05	11646000	0	0	0	0	0	0	0	0	581	757	4239;4240;4241;4242	6120;6121;6122;6123;6124;6125	6121	1093		6	11646000	0	0	0	0	0	0	0	0
693	ILAPAYFILGGNQSGEGCVITR	STSYEEAKNLLTKTKILAPAYFILGGNQSG	ILGGNQSGEGCVITRDRKESLDVYELDAKQ	K	I	L	T	R	D	22	0	2335.2	A0A1B0GV06;A0A1B0GUB3;A8K0B6;A0A1B0GUH5;A0A1B0GTZ5;A0A1B0GTM3;A0A1B0GUA4;A0A1B0GW68;E7EMM4;A0A1B0GUW4;A0A1B0GUG1;A0A1B0GVG2;A0A1B0GUE3;B3KUZ6;A0A1B0GTP7;D3DSQ1;Q13510	A0A1B0GV06	80	101	ASAH1	Acid ceramidase;Acid ceramidase subunit alpha;Acid ceramidase subunit beta	yes	no	3	0.0046045	68.42	0	0	0	8534200	0	0	0	0	0	207	758	4243	6126	6126	388		1	0	0	0	4159800	0	0	0	0	0
694	ILCDNADNITR	SPAQLTQIKQTSLARILCDNADNITRVQSD	SLARILCDNADNITRVQSDVFRVAEFPHGY	R	I	L	T	R	V	11	0	1303.62	Q92626;Q96GF5	Q92626	1273	1283	PXDN	Peroxidasin homolog	yes	no	2	2.5833e-05	171.56	0	0	0	56202000	0	19173000	95142000	637120000	233060000	645	759	4244;4245;4246;4247;4248	6127;6128;6129;6130;6131;6132	6127	1205		6	0	0	0	27394000	0	16500000	12291000	49792000	25293000
697	ILLTCSLNDSATEVTGHR	LGTHGASGAEDLGSKILLTCSLNDSATEVT	TCSLNDSATEVTGHRWLKGGVVLKEDALPG	K	I	L	H	R	W	18	0	1985.98	I3L192;A0A087X2B5;B4DY23;Q54A51;B4DNE1;P35613;A0A2R8YDZ0;A8MZ77	I3L192	29	46	BSG;hEMMPRIN	Basigin	yes	no	2;3	9.5006e-127	274.24	92383000	189810000	53921000	276250000	108440000	271120000	1530600000	2978900000	1879900000	145	762	4252;4253;4254;4255;4256;4257;4258;4259;4260;4261;4262;4263;4264;4265;4266;4267;4268;4269;4270;4271;4272	6136;6137;6138;6139;6140;6141;6142;6143;6144;6145;6146;6147;6148;6149;6150;6151;6152;6153;6154;6155;6156;6157;6158;6159;6160;6161;6162;6163;6164;6165;6166;6167;6168	6161	293		33	92383000	160350000	57815000	134650000	132170000	233320000	197750000	232810000	204010000
698	ILNQTADMLQLASK	RKRDNALELSQLENRILNQTADMLQLASKY	RILNQTADMLQLASKYKDLEHKYQHLATLA	R	I	L	S	K	Y	14	0	1544.82	Q9UKU9;A0A024R868;B2R780	Q9UKU9	162	175	ANGPTL2	Angiopoietin-related protein 2	yes	no	2;3	3.3748e-169	300.78	933910000	1594300000	1367700000	488330000	104850000	232500000	12389000000	6206500000	8952100000	67	763;764	4273;4274;4275;4276;4277;4278;4279;4280;4281;4282;4283;4284;4285;4286;4287;4288;4289;4290;4291;4292;4293;4294;4295;4296;4297;4298;4299	6169;6170;6171;6172;6173;6174;6175;6176;6177;6178;6179;6180;6181;6182;6183;6184;6185;6186;6187;6188;6189;6190;6191;6192;6193;6194;6195;6196;6197;6198;6199;6200;6201;6202;6203;6204;6205;6206;6207;6208	6192	113	6	40	933910000	1346900000	1466400000	238020000	127790000	200090000	1600500000	485050000	971540000
699	ILNVTTEMLK	RKRDNSLELSQLENKILNVTTEMLKVATRY	QLENKILNVTTEMLKVATRYRELEVKYASL	K	I	L	L	K	V	10	0	1160.65	B4DTH4;Q53F22;A0A024R908;O95841	B4DTH4	122	131	ANGPTL1	Angiopoietin-related protein 1	yes	no	2	0.00031014	124.74	0	0	0	4529400	0	0	42975000	62725000	0	74	765	4300;4301;4302;4303	6209;6210;6211;6212	6211	127		4	0	0	0	2207700	0	0	5552000	4902100	0
700	INATTGEIFNK	GQVFYFIKSQSEYFRINATTGEIFNKQILK	EYFRINATTGEIFNKQILKYQNVTGFSNVN	R	I	N	N	K	Q	11	0	1206.62	Q6V0I7	Q6V0I7	2920	2930	FAT4	Protocadherin Fat 4	yes	yes	2	3.6735e-05	132.39	0	0	0	12504000	0	0	0	0	0	618	766	4304	6213	6213	1156		1	0	0	0	6094800	0	0	0	0	0
701	INCSDGYIEYYICR	LRPHFLDVCDPDWSKINCSDGYIEYYICRG	KINCSDGYIEYYICRGNAERVKEGRLSFYS	K	I	N	C	R	G	14	0	1824.78	A0A024QZU7;A0A024QZS3;O14494	A0A024QZU7	142	155	PPAP2A	Lipid phosphate phosphohydrolase 1	yes	no	2	9.1299e-66	251.03	0	0	0	18768000	0	0	102830000	90087000	55614000	12	767	4305;4306;4307;4308	6214;6215;6216;6217;6218	6216	17		5	0	0	0	9147900	0	0	13285000	7040500	6035600
702	INEFSISSFCTVVDVVNFSK	PVNTNLENLYLQGNRINEFSISSFCTVVDV	ISSFCTVVDVVNFSKLQVLRLDGNEIKRSA	R	I	N	S	K	L	20	0	2291.11	A0A3B3IRN5;B4E1J3;A0A024R971;Q06828;B3KS64;Q12833	A0A3B3IRN5	236	255	FMOD	Fibromodulin	yes	no	2	1.1449e-136	276.64	62213000	90690000	44934000	14937000	94447000	0	72608000	0	0	80	768;769	4309;4310;4311;4312;4313;4314;4315;4316;4317	6219;6220;6221;6222;6223;6224;6225;6226;6227	6220	142		9	62213000	76616000	48178000	7280800	115110000	0	9380300	0	0
703	INGSANFSFNDEEMK	LSFWGKKKNITKTFKINGSANFSFNDEEMK	INGSANFSFNDEEMKNVMDSSNGLSEYLDL	K	I	N	M	K	N	15	0	1701.73	Q6YHK3	Q6YHK3	286	300	CD109	CD109 antigen	yes	yes	2	2.8776e-29	213.84	0	0	0	10183000	0	0	0	0	0	619	770;771	4318;4319	6228;6229	6228	1159;1160		2	0	0	0	4963600	0	0	0	0	0
705	INLTIGSR	LSVQRVYIQTREEKRINLTIGSRAYLLPNT	QTREEKRINLTIGSRAYLLPNTSVIIKCPV	R	I	N	S	R	A	8	0	872.508	P82987	P82987	914	921	ADAMTSL3	ADAMTS-like protein 3	yes	yes	2	0.003247	157.33	21322000	42786000	15530000	4388600	0	0	0	0	0	567	775	4400;4401;4402;4403	6352;6353;6354;6355;6356	6355	1045		5	21322000	36146000	16651000	2139100	0	0	0	0	0
706	INNGGCQDLCLLTHQGHVNCSCR	AVANDTNSCELSPCRINNGGCQDLCLLTHQ	LCLLTHQGHVNCSCRGGRILQDDLTCRAVN	R	I	N	C	R	G	23	0	2712.17	Q07954;Q59FG2	Q07954	2484	2506	LRP1	Prolow-density lipoprotein receptor-related protein 1;Low-density lipoprotein receptor-related protein 1 85 kDa subunit;Low-density lipoprotein receptor-related protein 1 515 kDa subunit;Low-density lipoprotein receptor-related protein 1 intracellular domain	yes	no	3;4	2.2968e-13	108.4	0	0	0	17326000	0	0	0	0	0	575	776;777	4404;4405	6357;6358;6359	6359	1068;1069		3	0	0	0	8445400	0	0	0	0	0
707	INNTHALVSLLQNLNK	IHKQAVPDKVWKISKINNTHALVSLLQNLN	NNTHALVSLLQNLNKANYNLPIMVTDSGKP	K	I	N	N	K	A	16	0	1791	B7Z236;B7Z3H7;P55290;B7Z985	B7Z236	339	354	CDH13	Cadherin-13	yes	no	3	1.2625e-14	170.91	0	0	0	27652000	70887000	26897000	472040000	887600000	468000000	416	778	4406;4407;4408;4409;4410;4411	6360;6361;6362;6363;6364;6365;6366;6367;6368;6369;6370	6366	745;746		11	0	0	0	13478000	86397000	23147000	60984000	69368000	50790000
708	INSSSPLR	QAGVDGTVSGWEEARINSSSPLRYNRQIGE	SGWEEARINSSSPLRYNRQIGEFIVTRAGL	R	I	N	L	R	Y	8	0	872.472	A0A0A6YY99;Q4ACW9;A0A0U5J5F5;O43508	A0A0A6YY99	138	145	TNFSF12-TNFSF13;TWEAK;TNFSF12	Tumor necrosis factor ligand superfamily member 12;Tumor necrosis factor ligand superfamily member 12, membrane form;Tumor necrosis factor ligand superfamily member 12, secreted form	yes	no	2	0.0049505	124.83	11177000	23128000	16842000	0	0	0	0	0	0	158	779	4412;4413;4414	6371;6372;6373	6372	318		3	11177000	19539000	18058000	0	0	0	0	0	0
709	INTTADEKDPTNPFR	FSGIRNISFMVKRIRINTTADEKDPTNPFR	INTTADEKDPTNPFRFPNIGVEKFLELNSE	R	I	N	F	R	F	15	1	1717.83	A0AV88;A0A024R5U5;O14672	A0AV88	277	291	ADAM10	Disintegrin and metalloproteinase domain-containing protein 10	yes	no	3	7.2716e-05	122.93	0	0	0	36876000	0	0	0	0	0	47	780	4415	6374	6374	80		1	0	0	0	17974000	0	0	0	0	0
710	INVNVNSAAGLLDQFYEK	SRQWSGSPPICAPMKINVNVNSAAGLLDQF	NVNSAAGLLDQFYEKQRLLIISAPDPSNRY	K	I	N	E	K	Q	18	0	1994.01	O60687;A0A1W2PNZ6	O60687	324	341	SRPX2	Sushi repeat-containing protein SRPX2	yes	no	2	2.3204e-45	220.99	0	0	0	0	0	0	0	67890000	88594000	512	781	4416;4417;4418	6375;6376;6377	6377	904		3	0	0	0	0	0	0	0	5305800	9614700
711	INYTVPQSGTFK	SGSNSGNQKMEAVQKINYTVPQSGTFKIEF	VQKINYTVPQSGTFKIEFPILEDSSELQLK	K	I	N	F	K	I	12	0	1353.69	Q6YHK3	Q6YHK3	418	429	CD109	CD109 antigen	yes	yes	2	6.4721e-06	164.64	0	0	53178000	318420000	215530000	0	1287800000	2429000000	1307300000	619	782	4419;4420;4421;4422;4423;4424;4425	6378;6379;6380;6381;6382;6383;6384;6385;6386;6387	6384	1161		9	0	0	57017000	155210000	262690000	0	166370000	189830000	141870000
712	IPAINQTITEANEK	RVNDNKTAAEEALRKIPAINQTITEANEKT	KIPAINQTITEANEKTREAQQALGSAAADA	K	I	P	E	K	T	14	0	1540.81	A0A024R972;P11047	A0A024R972	1355	1368	LAMC1	Laminin subunit gamma-1	yes	no	2	1.1272e-44	234.24	0	0	0	91334000	6617100	0	200500000	393760000	108490000	81	783	4426;4427;4428;4429;4430	6388;6389;6390;6391;6392;6393;6394;6395;6396	6393	160		9	0	0	0	44519000	8064900	0	25903000	30773000	11775000
713	IPCSQPPQIEHGTINSSR	CKDGRWQSIPLCVEKIPCSQPPQIEHGTIN	SQPPQIEHGTINSSRSSQESYAHGTKLSYT	K	I	P	S	R	S	18	0	2019.98	A0A024R962;P08603;Q14006;A0A024R984;A8K5T0	A0A024R962	868	885	hCG_40889;CFH;HF	Complement factor H	yes	no	2;3	1.4275e-22	182.31	0	189150000	65558000	638430000	218120000	364480000	1371700000	3731100000	1899100000	79	784	4431;4432;4433;4434;4435;4436;4437;4438;4439;4440;4441	6397;6398;6399;6400;6401;6402;6403;6404;6405;6406;6407;6408;6409;6410;6411;6412;6413;6414;6415;6416;6417;6418;6419	6417	133		23	0	159800000	70291000	311190000	265850000	313660000	177210000	291590000	206100000
714	IPDHDPAPNVTVLLR	KKGKTKKKEEKPNGKIPDHDPAPNVTVLLR	IPDHDPAPNVTVLLREPVRAPAVAVAPTPV	K	I	P	L	R	E	15	0	1655.9	A2A2S5;Q32NB1;A7BI36;Q9P2E9	A2A2S5	83	97	RRBP1	Ribosome-binding protein 1	yes	no	3	0.0098171	65.467	0	0	0	0	0	0	0	0	0	267	785	4442	6420	6420	506		1	0	0	0	0	0	0	0	0	0
715	IPNNTQWVTWSPVGHK	DIYDLNKRQLITEERIPNNTQWVTWSPVGH	PNNTQWVTWSPVGHKLAYVWNNDIYVKIEP	R	I	P	H	K	L	16	0	1862.94	P27487;F8WE17	P27487	148	163	DPP4	Dipeptidyl peptidase 4;Dipeptidyl peptidase 4 membrane form;Dipeptidyl peptidase 4 soluble form	yes	no	3	1.0537e-14	172.26	0	0	0	47479000	0	11827000	0	290210000	186050000	556	786	4443;4444;4445;4446;4447	6421;6422;6423;6424;6425;6426;6427;6428;6429	6429	1016;1017		9	0	0	0	23143000	0	10178000	0	22680000	20191000
718	IQGEEIVFHDLNLTAHGISHCPTCR	AGLSSGFIGCVRELRIQGEEIVFHDLNLTA	LNLTAHGISHCPTCRDRPCQNGGQCHDSES	R	I	Q	C	R	D	25	0	2903.38	A0A024RAB6;P98160;A0A0U1RQT3;Q59EG0;Q2VPA1	A0A024RAB6	3780	3804	HSPG2	Basement membrane-specific heparan sulfate proteoglycan core protein;Endorepellin;LG3 peptide	yes	no	3;4;5	7.9475e-103	240.75	242140000	46266000	162490000	133100000	0	32573000	897660000	1465300000	1199600000	89	789	4473;4474;4475;4476;4477;4478;4479;4480;4481;4482;4483;4484;4485;4486;4487;4488;4489	6465;6466;6467;6468;6469;6470;6471;6472;6473;6474;6475;6476;6477;6478;6479;6480;6481;6482;6483;6484;6485;6486;6487;6488;6489;6490;6491;6492;6493;6494	6487	181		30	242140000	39086000	174220000	64879000	0	28032000	115970000	114510000	130190000
720	IQNYSVMDICDYDESSGR	TWATQERISLQWLRRIQNYSVMDICDYDES	YSVMDICDYDESSGRWNCLVARQHIEMSTT	R	I	Q	G	R	W	18	0	2150.89	P27487	P27487	319	336	DPP4	Dipeptidyl peptidase 4;Dipeptidyl peptidase 4 membrane form;Dipeptidyl peptidase 4 soluble form	yes	yes	2	4.3604e-08	130.07	0	0	0	8638000	0	0	0	0	0	556	791	4493	6498	6498	1018		1	0	0	0	4210400	0	0	0	0	0
721	IQTLQAPPDMAPANVSLR	VNIVGTSPPSQPSRKIQTLQAPPDMAPANV	LQAPPDMAPANVSLRTASETSLWLRWMPLP	K	I	Q	L	R	T	18	0	1921.01	Q58EX2;H7C2P2	Q58EX2	1089	1106	SDK2	Protein sidekick-2	yes	no	2	1.5359e-20	158.81	0	0	0	0	0	0	0	286850000	0	594	792	4494	6499	6499	1111		1	0	0	0	0	0	0	0	22418000	0
723	ISCTIANR	SMIWDCTCIGAGRGRISCTIANRCHEGGQS	IGAGRGRISCTIANRCHEGGQSYKIGDTWR	R	I	S	N	R	C	8	0	933.47	A0A024R462;P02751;B7ZLE5;A0A384MR03;Q6MZF4	A0A024R462	133	140	FN1;DKFZp686K139	Fibronectin;Anastellin;Ugl-Y1;Ugl-Y2;Ugl-Y3	yes	no	2	0.0033781	154.35	13995000	32832000	14881000	49194000	21577000	30634000	235530000	84642000	448090000	35	794	4496;4497;4498;4499;4500;4501;4502;4503;4504	6501;6502;6503;6504;6505;6506;6507;6508;6509	6507	58		9	13995000	27736000	15956000	23978000	26298000	26363000	30429000	6615000	48629000
724	ISEENETTCYMGK	AHGTKLSYTCEGGFRISEENETTCYMGKWS	FRISEENETTCYMGKWSSPPQCEGLPCKSP	R	I	S	G	K	W	13	0	1560.64	A0A024R962;P08603;Q14006;A0A024R984	A0A024R962	907	919	hCG_40889;CFH;HF	Complement factor H	yes	no	2	1.6205e-23	215.06	0	5591900	6443700	766200000	0	0	768350000	2762300000	994750000	79	795;796	4505;4506;4507;4508;4509;4510;4511;4512;4513;4514;4515;4516	6510;6511;6512;6513;6514;6515;6516;6517;6518;6519;6520;6521;6522;6523;6524;6525;6526;6527;6528;6529	6521	134	8	20	0	4724100	6908900	373470000	0	0	99264000	215880000	107960000
725	ISELIERNQRYVEQSNLMMEK	EILEKSNRIEEQNDKISELIERNQRYVEQS	RNQRYVEQSNLMMEKRNNSLQTATENTQAR	K	I	S	E	K	R	21	2	2609.29	B4DVS2;B4DZS8;A0A0A0MT60;Q5T1M5	B4DVS2	176	196	FKBP15	Peptidyl-prolyl cis-trans isomerase;FK506-binding protein 15	yes	no	3	0.019548	53.278	0	0	0	41496000	0	17601000	163820000	0	0	155	797	4517;4518;4519	6530;6531;6532	6531	314;315	31;32	3	0	0	0	20226000	0	15147000	21164000	0	0
729	ISNLTIVQAEIK	DLLQREKEIAFLSEKISNLTIVQAEIKDIK	SEKISNLTIVQAEIKDIKDEIAHISDMN__	K	I	S	I	K	D	12	0	1327.77	Q3B7K3;Q70UQ0	Q3B7K3	243	254	IKIP;IKBIP	Inhibitor of nuclear factor kappa-B kinase-interacting protein	yes	no	2	8.3987e-09	193.3	0	0	0	22333000	11773000	10511000	0	153990000	35858000	589	801	4531;4532;4533;4534;4535	6549;6550;6551;6552;6553;6554	6553	1104		6	0	0	0	10886000	14349000	9045800	0	12034000	3891600
730	ISSLQTTEKNDTVAGQGER	MNCTSDMEINPLRIKISSLQTTEKNDTVAG	QTTEKNDTVAGQGERDHLITKRDLALSEGD	K	I	S	E	R	D	19	1	2033	L7RXH0;A5YM53;P06756;H7BZG1	L7RXH0	865	883	ITGAV	Integrin alpha-V;Integrin alpha-V heavy chain;Integrin alpha-V light chain	yes	no	2;3	3.0624e-80	243.41	18108000	87153000	35976000	214210000	0	12127000	425090000	1302100000	590140000	285	802	4536;4537;4538;4539;4540;4541;4542;4543;4544;4545;4546	6555;6556;6557;6558;6559;6560;6561;6562;6563;6564;6565;6566;6567;6568;6569;6570;6571;6572;6573;6574	6562	532		19	18108000	73627000	38574000	104410000	0	10436000	54918000	101760000	64045000
731	ISVITIFGPVNNSTMK	RDEYLESFCKMATRKISVITIFGPVNNSTM	SVITIFGPVNNSTMKIDHFQLDNEKPMRVV	K	I	S	M	K	I	16	0	1719.92	A3KC71;Q76M96;H7C5K4;B4E342	A3KC71	657	672	okuribin;CCDC80	Coiled-coil domain-containing protein 80	yes	no	2	2.841e-14	167.2	0	0	87989000	130790000	36862000	72723000	0	426900000	426560000	272	803;804	4547;4548;4549;4550;4551;4552;4553;4554	6575;6576;6577;6578;6579;6580;6581;6582;6583;6584;6585	6576	512;513	60	11	0	0	94342000	63751000	44928000	62583000	0	33363000	46293000
732	ISWEEYNR	WQEPGEKNGILTGYRISWEEYNRTNTRVTH	GILTGYRISWEEYNRTNTRVTHYLPNVTLE	R	I	S	N	R	T	8	0	1095.5	Q58EX2;H7C2P2	Q58EX2	930	937	SDK2	Protein sidekick-2	yes	no	2	0.004583	127.12	10490000	29130000	12929000	16665000	0	0	0	236500000	0	594	805	4555;4556;4557;4558;4559	6586;6587;6588;6589;6590	6590	1112		5	10490000	24609000	13862000	8122900	0	0	0	18483000	0
733	ITDIENGSLANIPR	KRYKELQRLGLGNNKITDIENGSLANIPRV	KITDIENGSLANIPRVREIHLENNKLKKIP	K	I	T	P	R	V	14	0	1511.79	Q6P528;Q9BXN1	Q6P528	281	294	ASPN	Asporin	yes	no	1;2;3	8.1933e-192	308.91	557410000	461030000	309420000	10212000000	2058400000	4094100000	40449000000	38527000000	32546000000	612	806	4560;4561;4562;4563;4564;4565;4566;4567;4568;4569;4570;4571;4572;4573;4574;4575;4576;4577;4578;4579;4580;4581;4582;4583;4584;4585;4586	6591;6592;6593;6594;6595;6596;6597;6598;6599;6600;6601;6602;6603;6604;6605;6606;6607;6608;6609;6610;6611;6612;6613;6614;6615;6616;6617;6618;6619;6620;6621;6622;6623;6624;6625;6626;6627;6628;6629;6630;6631;6632;6633;6634;6635;6636;6637	6619	1143		41	557410000	389480000	331760000	4977500000	2508800000	3523300000	5225700000	3010900000	3532100000
735	ITIPPHLAYGENGTGDK	MDQGLQGACMGERRRITIPPHLAYGENGTG	IPPHLAYGENGTGDKIPGSAVLIFNVHVID	R	I	T	D	K	I	17	0	1781.89	Q6ZME7;Q658U4;A0A024R1W3;Q96AY3;Q8NAG5;B4DJJ5	Q6ZME7	341	357	DKFZp666D193;FKBP10	Peptidyl-prolyl cis-trans isomerase FKBP10	yes	no	3	0.0030724	74.12	0	0	0	10274000	0	0	0	0	0	23	808	4597;4598;4599;4600;4601	6652;6653;6654;6655;6656;6657;6658;6659	6652	26		8	0	0	0	5007700	0	0	0	0	0
736	ITLHENR	PDRRVWQTVSPVEGRITLHENRTLSIKEAS	TVSPVEGRITLHENRTLSIKEASFSDRGVY	R	I	T	N	R	T	7	0	881.472	Q9NR99	Q9NR99	2002	2008	MXRA5	Matrix-remodeling-associated protein 5	yes	yes	2	0.024325	149.48	0	0	0	122790000	18266000	0	122880000	181320000	183860000	662	809	4602;4603;4604;4605;4606	6660;6661;6662;6663;6664;6665	6660	1230		3	0	0	0	59854000	22262000	0	15875000	14171000	19954000
737	ITNISSDDSGK	SKHMNETSHTQGSLRITNISSDDSGKQISC	GSLRITNISSDDSGKQISCVAENLVGEDQD	R	I	T	G	K	Q	11	0	1135.54	S5MD53;Q5VWE5;Q548C2;A0A024R230;Q16620	S5MD53	40	50	NTRK2	Tyrosine-protein kinase receptor;BDNF/NT-3 growth factors receptor	yes	no	2	3.1459e-05	159.4	0	0	0	12780000	0	0	47274000	60139000	46007000	25	810	4607;4608;4609;4610	6666;6667;6668;6669;6670	6668	34		5	0	0	0	6229400	0	0	6107300	4700000	4992900
738	ITSASVNDSGEYR	FLNGTATQTSTPSYRITSASVNDSGEYRCQ	YRITSASVNDSGEYRCQRGLSGRSDPIQLE	R	I	T	Y	R	C	13	0	1397.64	A0A087WVS4;A0A087WUG7;A0A087WXZ6;A0A0A0MRM3;Q92637;P12314	A0A087WVS4	72	84	FCGR1B;FCGR1A	High affinity immunoglobulin gamma Fc receptor IB;High affinity immunoglobulin gamma Fc receptor I	yes	no	2	4.375e-23	213.34	0	0	0	29837000	0	6584600	0	0	0	125	811	4611;4612;4613	6671;6672;6673	6671	248		3	0	0	0	14544000	0	5666500	0	0	0
739	ITSNATSDLNIK	SGVKSLNVQKASTERITSNATSDLNIKVDG	TERITSNATSDLNIKVDGRAIVRGNEGVFI	R	I	T	I	K	V	12	0	1275.67	Q6IBJ4;Q5U0N0;Q16585	Q6IBJ4	208	219	SGCB	Beta-sarcoglycan	yes	no	2	2.3427e-14	185.33	0	7603600	0	39280000	0	23560000	168610000	408850000	0	586	812	4614;4615;4616;4617;4618;4619;4620	6674;6675;6676;6677;6678;6679;6680;6681	6681	1100		8	0	6423500	0	19146000	0	20275000	21783000	31952000	0
740	ITVHGNGSLDIR	FPEGVVLPAPYYGNRITVHGNGSLDIRSLR	GNRITVHGNGSLDIRSLRKSDSVQLVCMAR	R	I	T	I	R	S	12	0	1280.68	Q9NR99	Q9NR99	2495	2506	MXRA5	Matrix-remodeling-associated protein 5	yes	yes	3	0.017038	69.314	0	0	0	64471000	0	46561000	0	0	0	662	813	4621;4622	6682;6683;6684	6682	1231		3	0	0	0	31425000	0	40069000	0	0	0
743	IVAGSCVDCQALNTSTCPPNSVK	ILPILPKHCSEEQHKIVAGSCVDCQALNTS	CQALNTSTCPPNSVKLDIFPKECVYIHDPT	K	I	V	V	K	L	23	0	2477.13	Q0PNF2;Q9NY15	Q0PNF2	661	683	STAB1	Stabilin-1	yes	no	2	0.00077512	102.64	0	0	0	5447500	0	0	0	0	0	576	816	4633	6697	6697	1082		1	0	0	0	2655300	0	0	0	0	0
744	IVDVNLTSEGK	LWTYKKLEIGFNGNRIVDVNLTSEGKVKLV	NGNRIVDVNLTSEGKVKLVPNTKIQMSYSV	R	I	V	G	K	V	11	0	1173.62	Q5TB53;Q8WUB5;Q96JZ5;A0A024QYS2;Q9HD45	Q5TB53	126	136	TM9SF3;SMBP	Transmembrane 9 superfamily member 3	yes	no	2	2.6918e-05	156.83	11031000	22556000	0	145480000	0	0	281970000	1159500000	449620000	5	817	4634;4635;4636;4637;4638;4639;4640	6698;6699;6700;6701;6702;6703;6704;6705	6702	5		8	11031000	19055000	0	70913000	0	0	36427000	90615000	48796000
745	IVLDPSGSMNIYLVLDGSDSIGASNFTGAK	DAEDGHGPGEQQKRKIVLDPSGSMNIYLVL	DGSDSIGASNFTGAKKCLVNLIEKVASYGV	K	I	V	A	K	K	30	0	3040.51	E7ETN3;B4E1Z4;A0A1U9X7I0;P00751;A0A1U9X7H5;A0A1U9X7H6;A0A1U9X7H7;A0A1U9X7H8;A0A0G2JH38;A0A1U9X7H4;A0A1U9X7H2	E7ETN3	612	641	CFB	Complement factor B;Complement factor B Ba fragment;Complement factor B Bb fragment	yes	no	3	3.4628e-05	61.499	0	0	0	0	0	0	0	0	0	471	818	4641	6706	6706	835;836		1	0	0	0	0	0	0	0	0	0
746	IVNYTPDLPK	FPGIPKWRKTHLTYRIVNYTPDLPKDAVDS	HLTYRIVNYTPDLPKDAVDSAVEKALKVWE	R	I	V	P	K	D	10	0	1158.63	P08254	P08254	118	127	MMP3	Stromelysin-1	yes	yes	2	0.010775	98.048	0	0	0	0	0	0	0	36772000	72923000	537	819	4642;4643	6707;6708	6707	970		2	0	0	0	0	0	0	0	2873800	7914100
747	IVTDWQNYTR	GIQRKTDEETLTLQKIVTDWQNYTRLFSGL	LTLQKIVTDWQNYTRLFSGLRTTSTKTGEA	K	I	V	T	R	L	10	0	1294.63	Q6AZY7	Q6AZY7	251	260	SCARA3	Scavenger receptor class A member 3	yes	yes	2	0.00015898	186.25	0	23847000	0	48786000	32799000	29485000	450800000	676190000	265410000	605	820	4644;4645;4646;4647;4648;4649;4650;4651	6709;6710;6711;6712;6713;6714;6715;6716;6717;6718;6719	6716	1133		11	0	20147000	0	23780000	39975000	25374000	58239000	52845000	28804000
748	IVVYNQPYINYSR	SFDELQRRASEARGKIVVYNQPYINYSRTV	GKIVVYNQPYINYSRTVQY___________	K	I	V	S	R	T	13	0	1627.84	E5RJA8;B4DJC2;A0A024R9B8;Q9Y646	E5RJA8	170	182	CPQ;PGCP	Carboxypeptidase Q	yes	no	2	1.2288e-16	201.75	37215000	32550000	0	0	0	0	0	0	0	82	821	4652;4653;4654;4655	6720;6721;6722;6723	6720	166		4	37215000	27498000	0	0	0	0	0	0	0
750	IYIVGGYNWR	RAGQSEAGCCLLERKIYIVGGYNWRLNNVT	LLERKIYIVGGYNWRLNNVTGIVQVYNTDT	K	I	Y	W	R	L	10	0	1239.64	A0A024R7N5;Q53HC5	A0A024R7N5	561	570	KLHL26	Kelch-like protein 26	yes	no	2;3	0.011488	91.041	0	1699600000	1348300000	0	0	0	0	0	280260000	61	823	4657;4658;4659;4660;4661;4662;4663;4664;4665;4666;4667;4668;4669;4670	6726;6727;6728;6729;6730;6731;6732;6733;6734;6735;6736;6737;6738;6739	6738	101		14	0	1435800000	1445700000	0	0	0	0	0	30416000
751	IYPGVDFGGEELNVTFVK	LLTCKRTLPEPCHSKIYPGVDFGGEELNVT	GVDFGGEELNVTFVKGVNVCQETCTKMIRC	K	I	Y	V	K	G	18	0	1983	E9PBC5;B4DMX2;A8K9A9;H0YAC1;P03952	E9PBC5	258	275	KLKB1	Plasma kallikrein;Plasma kallikrein heavy chain;Plasma kallikrein light chain	yes	no	2	1.1915e-24	145.81	0	0	0	0	0	0	0	365280000	275320000	308	824	4671;4672;4673;4674;4675	6740;6741;6742;6743;6744;6745	6740	574		6	0	0	0	0	0	0	0	28547000	29879000
752	IYPLTWNGSLCMR	VLSELPEPVVARFIRIYPLTWNGSLCMRLE	IRIYPLTWNGSLCMRLEVLGCSVAPVYSYY	R	I	Y	M	R	L	13	0	1609.77	Q8IUX7	Q8IUX7	522	534	AEBP1	Adipocyte enhancer-binding protein 1	yes	yes	2	7.2352e-09	176.6	0	4801200	0	111380000	0	52607000	119600000	407320000	136780000	629	825;826	4676;4677;4678;4679;4680;4681;4682;4683;4684	6746;6747;6748;6749;6750;6751;6752;6753;6754;6755;6756;6757	6748	1178	118	11	0	4056100	0	54292000	0	45272000	15451000	31833000	14844000
753	IYSGILNLSDITK	AAHCFDGLPLQDVWRIYSGILNLSDITKDT	WRIYSGILNLSDITKDTPFSQIKEIIIHQN	R	I	Y	T	K	D	13	0	1435.79	E9PBC5;B4DMX2;A8K9A9;H0YAC1;P03952	E9PBC5	409	421	KLKB1	Plasma kallikrein;Plasma kallikrein heavy chain;Plasma kallikrein light chain	yes	no	2	6.7122e-16	190.26	0	0	0	62274000	0	0	252940000	551090000	305010000	308	827	4685;4686;4687;4688;4689	6758;6759;6760;6761;6762	6760	575		5	0	0	0	30354000	0	0	32678000	43069000	33101000
754	IYVLDGTQNDTAFVFPR	PAGLWTKDPLGQTEKIYVLDGTQNDTAFVF	VLDGTQNDTAFVFPRLRDFTLAMAARKASR	K	I	Y	P	R	L	17	0	1954.98	B4DNG0;M1LAK4;Q9NRN5	B4DNG0	108	124	OLFML3	Olfactomedin-like protein 3	yes	no	2	1.4423e-196	305.6	0	51166000	16360000	460270000	37362000	66521000	1756600000	4658500000	1563000000	382	828	4690;4691;4692;4693;4694;4695;4696;4697;4698;4699;4700;4701;4702;4703;4704;4705;4706	6763;6764;6765;6766;6767;6768;6769;6770;6771;6772;6773;6774;6775;6776;6777;6778;6779;6780;6781;6782;6783;6784	6779	692		18	0	43225000	17541000	224350000	45537000	57246000	226940000	364070000	169630000
755	KCNMTEEQSK	VCERGWFGKLCQHPRKCNMTEEQSKNLCES	CQHPRKCNMTEEQSKNLCESADGILCSGKG	R	K	C	S	K	N	10	1	1253.54	U3KPX5;B4DN32;A0A087WXI7;O14549;A0A087WY35;A0A024RDW7;O95965	U3KPX5	117	126	ITGBL1	Integrin beta-like protein 1	yes	no	2	2.7853e-217	327.15	0	0	0	33859000	0	0	337160000	0	0	105	829	4707;4708;4709	6785;6786;6787	6787	228		3	0	0	0	16504000	0	0	43558000	0	0
757	KDNTTVTR	LLASMGLQLNLTYERKDNTTVTRLLNINPN	LNLTYERKDNTTVTRLLNINPNKTSASGSC	R	K	D	T	R	L	8	1	933.488	B3KRY3;A0A024RDY3;P11279;Q59FZ0	B3KRY3	225	232	LAMP1	Lysosome-associated membrane glycoprotein 1	yes	no	2	1.4167e-29	234.47	26059000	10652000	0	133170000	105280000	11983000	0	0	0	106	831	4715;4716;4717;4718;4719	6793;6794;6795;6796;6797;6798	6796	229		4	26059000	8999000	0	64910000	128320000	10313000	0	0	0
758	KDTCTQECSYFNITK	HKECVQCRAFNKGEKKDTCTQECSYFNITK	KDTCTQECSYFNITKVESRDKLPQPVQPDP	K	K	D	T	K	V	15	1	1893.82	P05556	P05556	658	672	ITGB1	Integrin beta-1	yes	yes	2;3	3.0774e-84	254.45	0	0	0	60700000	0	79594000	0	414600000	0	534	832	4720;4721;4722;4723	6799;6800;6801;6802;6803	6802	955		5	0	0	0	29587000	0	68496000	0	32402000	0
759	KECYYNLNDASLCDNVLAPNVTK	STDLDVDVDQPKEEKKECYYNLNDASLCDN	DASLCDNVLAPNVTKQECCCTSGVGWGDNC	K	K	E	T	K	Q	23	1	2700.25	Q14766;C9JD84;E7EV71;B7ZLY3;H7C0I7;B4DRF7;B4DZD1;B4DNR7;B4DST8	Q14766	1347	1369	LTBP1	Latent-transforming growth factor beta-binding protein 1	yes	no	3	2.297e-06	114.57	0	0	9012100	26007000	0	0	66411000	169880000	0	582	833	4724;4725;4726;4727	6804;6805;6806;6807;6808	6805	1094		5	0	0	9662900	12677000	0	0	8579700	13276000	0
760	KEDALNETR	ERKTLLSNLEEAKKKKEDALNETRESETKL	EEAKKKKEDALNETRESETKLKELPGVCNE	K	K	E	T	R	E	9	1	1074.53	A0A384NKS6;P10909;E7ETB4;E7ERK6;H0YLK8;E5RJZ5;E5RGB0;E5RH61	A0A384NKS6	133	141	CLU	Clusterin;Clusterin beta chain;Clusterin alpha chain	yes	no	1;2;3	2.6534e-98	245.27	2516000000	8123600000	4291400000	2189600000	219240000	566070000	6984100000	7902400000	11943000000	250	834	4728;4729;4730;4731;4732;4733;4734;4735;4736;4737;4738;4739;4740;4741;4742;4743;4744;4745;4746;4747;4748;4749;4750;4751;4752;4753;4754;4755;4756;4757;4758;4759;4760;4761;4762;4763;4764;4765;4766;4767;4768;4769;4770;4771;4772;4773;4774;4775;4776	6809;6810;6811;6812;6813;6814;6815;6816;6817;6818;6819;6820;6821;6822;6823;6824;6825;6826;6827;6828;6829;6830;6831;6832;6833;6834;6835;6836;6837;6838;6839;6840;6841;6842;6843;6844;6845;6846;6847;6848;6849;6850;6851;6852;6853;6854;6855;6856;6857;6858;6859;6860;6861;6862;6863;6864;6865;6866;6867;6868	6853	470		48	2516000000	6862900000	4601300000	1067300000	267210000	487140000	902280000	617590000	1296200000
761	KEDALNETRESETK	ERKTLLSNLEEAKKKKEDALNETRESETKL	KKEDALNETRESETKLKELPGVCNETMMAL	K	K	E	T	K	L	14	2	1648.79	A0A384NKS6;P10909;E7ETB4;E7ERK6;H0YLK8;E5RJZ5;E5RGB0;E5RH61	A0A384NKS6	133	146	CLU	Clusterin;Clusterin beta chain;Clusterin alpha chain	yes	no	2;3;4	4.3122e-23	209.56	0	520080000	355810000	9113800	0	0	347730000	184030000	791460000	250	835	4777;4778;4779;4780;4781;4782;4783;4784;4785;4786;4787;4788;4789;4790;4791;4792;4793;4794;4795;4796;4797;4798;4799	6869;6870;6871;6872;6873;6874;6875;6876;6877;6878;6879;6880;6881;6882;6883;6884;6885;6886;6887;6888;6889;6890;6891;6892;6893;6894;6895;6896	6879	470		26	0	439370000	381500000	4442300	0	0	44923000	14382000	85895000
763	KENSSEICSNNGECVCGQCVCR	STDEVNSEDMDAYCRKENSSEICSNNGECV	CSNNGECVCGQCVCRKRDNTNEIYSGKFCE	R	K	E	C	R	K	22	1	2646.03	P05556;H7C4N8	P05556	518	539	ITGB1	Integrin beta-1	yes	no	3	1.06e-31	158.52	0	0	0	25726000	0	4605400	0	0	0	534	837;838	4804;4805;4806;4807;4808;4809	6902;6903;6904;6905;6906;6907	6902	956;957;958		6	0	0	0	12540000	0	3963300	0	0	0
764	KGFCEAPGNR	______________________________	SLSVRKGFCEAPGNRTQSGNHPEDWPVYQE	R	K	G	N	R	T	10	1	1134.52	H0YD57;Q6LET0;P27701	H0YD57	8	17	CD82;KAI1	Tetraspanin;CD82 antigen	yes	no	2	0.040001	79.974	0	0	0	0	0	0	0	0	0	492	839	4810	6908	6908	870		1	0	0	0	0	0	0	0	0	0
765	KIPAINQTITEANEK	RRVNDNKTAAEEALRKIPAINQTITEANEK	KIPAINQTITEANEKTREAQQALGSAAADA	R	K	I	E	K	T	15	1	1668.9	A0A024R972;P11047	A0A024R972	1354	1368	LAMC1	Laminin subunit gamma-1	yes	no	2;3	0.00011209	113.65	0	0	0	22120000	0	0	0	0	0	81	840	4811;4812;4813	6909;6910;6911	6911	160		3	0	0	0	10782000	0	0	0	0	0
766	KKEDALNETR	EERKTLLSNLEEAKKKKEDALNETRESETK	EEAKKKKEDALNETRESETKLKELPGVCNE	K	K	K	T	R	E	10	2	1202.63	A0A384NKS6;P10909;E7ETB4;E7ERK6;H0YLK8;E5RJZ5;E5RGB0;E5RH61	A0A384NKS6	132	141	CLU	Clusterin;Clusterin beta chain;Clusterin alpha chain	yes	no	1;2;3	4.8455e-244	336.27	17412000000	12649000000	27173000000	2691200000	1631900000	1265500000	20231000000	15595000000	25025000000	250	841	4814;4815;4816;4817;4818;4819;4820;4821;4822;4823;4824;4825;4826;4827;4828;4829;4830;4831;4832;4833;4834;4835;4836;4837;4838;4839;4840;4841;4842;4843;4844;4845;4846;4847;4848;4849;4850;4851;4852;4853;4854;4855;4856;4857;4858;4859;4860;4861;4862;4863;4864;4865;4866;4867;4868;4869;4870;4871;4872	6912;6913;6914;6915;6916;6917;6918;6919;6920;6921;6922;6923;6924;6925;6926;6927;6928;6929;6930;6931;6932;6933;6934;6935;6936;6937;6938;6939;6940;6941;6942;6943;6944;6945;6946;6947;6948;6949;6950;6951;6952;6953;6954;6955;6956;6957;6958;6959;6960;6961;6962;6963;6964;6965;6966;6967;6968;6969;6970;6971;6972;6973;6974;6975;6976;6977;6978;6979;6980;6981;6982;6983;6984;6985;6986	6980	470		57	17412000000	10686000000	29135000000	1311800000	1988900000	1089100000	2613700000	1218800000	2715900000
767	KKPNATAEPTPPDR	WQNRDCSIALPYVCKKKPNATAEPTPPDRW	KKKPNATAEPTPPDRWANVKVECEPSWQPF	K	K	K	D	R	W	14	1	1520.79	Q9UBG0	Q9UBG0	361	374	MRC2	C-type mannose receptor 2	yes	yes	3	0.00021404	121.56	0	0	0	35396000	0	0	42295000	34022000	0	665	842	4873;4874;4875	6987;6988;6989	6987	1242		2	0	0	0	17253000	0	0	5464100	2658900	0
768	KLDFIILNETK	SALDKMLQNVQMPSKKLDFIILNETKFWYQ	MPSKKLDFIILNETKFWYQMILPPHFDKSK	K	K	L	T	K	F	11	1	1332.77	P27487	P27487	513	523	DPP4	Dipeptidyl peptidase 4;Dipeptidyl peptidase 4 membrane form;Dipeptidyl peptidase 4 soluble form	yes	yes	2	6.6652e-22	168.85	0	0	0	16839000	10539000	0	0	0	0	556	843	4876;4877;4878;4879	6990;6991;6992;6993;6994	6993	1019		4	0	0	0	8208000	12845000	0	0	0	0
770	KLHINHNNLTESVGPLPK	SKIKGRVFSKLKQLKKLHINHNNLTESVGP	INHNNLTESVGPLPKSLEDLQLTHNKITKL	K	K	L	P	K	S	18	1	2010.1	P51884;A0A384N669;Q53FV4	P51884	120	137	LUM	Lumican	yes	no	2;3;4	1.8243e-213	308.12	234890000	139320000	80415000	1018100000	1142400000	319290000	5563200000	6110500000	5882900000	248	845;846	4881;4882;4883;4884;4885;4886;4887;4888;4889;4890;4891;4892;4893;4894;4895;4896;4897;4898;4899;4900;4901;4902;4903;4904;4905;4906;4907;4908;4909;4910;4911;4912;4913;4914;4915;4916;4917;4918;4919;4920;4921;4922;4923;4924;4925;4926;4927;4928;4929;4930	6996;6997;6998;6999;7000;7001;7002;7003;7004;7005;7006;7007;7008;7009;7010;7011;7012;7013;7014;7015;7016;7017;7018;7019;7020;7021;7022;7023;7024;7025;7026;7027;7028;7029;7030;7031;7032;7033;7034;7035;7036;7037;7038;7039;7040;7041;7042;7043;7044;7045;7046;7047;7048;7049;7050;7051;7052;7053;7054;7055;7056;7057;7058;7059;7060;7061;7062;7063;7064	7009	460;461;462		59	234890000	117700000	86221000	496270000	1392400000	274780000	718710000	477550000	638450000
772	KLNNLTFLYLDHNALESVPLNLPESLR	YNKIKSRGIKANAFKKLNNLTFLYLDHNAL	NALESVPLNLPESLRVIHLQFNNIASITDD	K	K	L	L	R	V	27	1	3122.68	A8K0R3;B4DI63;P20774	A8K0R3	211	237	OGN	Mimecan	yes	no	3;4	9.7962e-116	244.21	0	0	0	0	0	0	436360000	0	921270000	293	848;849	4932;4933;4934;4935;4936;4937	7066;7067;7068;7069;7070;7071	7066	548;549;550		4	0	0	0	0	0	0	56374000	0	99982000
773	KLNYTLSQGHR	FTCKEATDVIIIHSKKLNYTLSQGHRVVLR	IHSKKLNYTLSQGHRVVLRGVGGSQPPDID	K	K	L	H	R	V	11	1	1315.7	A0A024RC61;Q59E93;P15144	A0A024RC61	126	136	ANPEP	Aminopeptidase N	yes	no	3	6.3888e-06	181.4	0	0	0	12361000	0	7122300	0	0	0	99	850	4938;4939	7072;7073	7072	219		1	0	0	0	6025300	0	6129300	0	0	0
774	KNASNMEYR	YSYWTKNGVELSATRKNASNMEYRINKPRA	ELSATRKNASNMEYRINKPRAEDSGEYHCV	R	K	N	Y	R	I	9	1	1111.51	Q9UFM8;Q9Y639;Q9Y499	Q9UFM8	159	167	DKFZp566H1924;NPTN	Neuroplastin	yes	no	2	1.7846e-208	332.33	0	0	0	0	26656000	0	0	356690000	221200000	667	851	4940;4941;4942;4943	7074;7075;7076;7077	7077	1251		4	0	0	0	0	32488000	0	0	27876000	24006000
775	KNITDLVEGAK	MVGNETTYEDGHGSRKNITDLVEGAKKANG	HGSRKNITDLVEGAKKANGVLEARQLAMRI	R	K	N	A	K	K	11	1	1186.66	A0A088QF11;A0A088QCU6;A0A024R798;A0A024R7D2;Q8IWA5;K7ESF5	A0A088QF11	197	207	SLC44A2	Choline transporter-like protein 2	yes	no	2;3	4.9398e-80	261.58	84124000	165260000	51464000	534880000	45612000	480540000	1243800000	2363800000	1063400000	56	852	4944;4945;4946;4947;4948;4949;4950;4951;4952;4953;4954;4955;4956;4957;4958;4959;4960;4961;4962;4963;4964;4965	7078;7079;7080;7081;7082;7083;7084;7085;7086;7087;7088;7089;7090;7091;7092;7093;7094;7095;7096;7097;7098;7099;7100;7101;7102;7103;7104;7105	7094	94		26	84124000	139610000	55180000	260720000	55592000	413540000	160690000	184740000	115410000
776	KNNTYLVK	RQEFLRQEDQLQDYRKNNTYLVKRLEYESK	DQLQDYRKNNTYLVKRLEYESKRPKRFNQM	R	K	N	V	K	R	8	1	978.55	A0A024R5S2;A8K4R1;Q6P4E1;H0YMR0;A0A3B3IRW9	A0A024R5S2	149	156	CASC4	Protein CASC4	yes	no	2	0.0066703	180.93	0	0	0	20263000	0	10206000	65062000	356760000	151310000	46	853	4966;4967;4968;4969;4970	7106;7107;7108;7109;7110	7109	78		3	0	0	0	9876900	0	8782900	8405500	27882000	16421000
777	KNVTLILDCK	LSDGKWHRIALSVHKKNVTLILDCKKKTTK	LSVHKKNVTLILDCKKKTTKFLDRSDHPMI	K	K	N	C	K	K	10	1	1202.67	Q59EE7;B2ZZ86;A0A024R8E5;P20908	Q59EE7	129	138	COL5A1	Collagen alpha-1(V) chain	yes	no	2	0.0077314	141.1	0	0	0	10231000	0	0	0	0	0	69	854	4971	7111	7111	116		1	0	0	0	4986800	0	0	0	0	0
779	KPGLSISENR	PPTLTWLKDGHPLLKKPGLSISENRSVLKI	HPLLKKPGLSISENRSVLKIEDAQVQDTGR	K	K	P	N	R	S	10	0	1099.6	Q96RW7	Q96RW7	2147	2156	HMCN1	Hemicentin-1	yes	yes	2	0.020261	79.148	0	0	0	6557000	0	0	0	0	0	653	856	4974	7114	7114	1218		1	0	0	0	3196100	0	0	0	0	0
780	KPNATAEPTPPDR	QNRDCSIALPYVCKKKPNATAEPTPPDRWA	KKKPNATAEPTPPDRWANVKVECEPSWQPF	K	K	P	D	R	W	13	0	1392.7	Q9UBG0	Q9UBG0	362	374	MRC2	C-type mannose receptor 2	yes	yes	2	7.4925e-78	254.19	0	0	0	19370000	5407000	4014800	12182000	81122000	37205000	665	857	4975;4976;4977;4978;4979;4980	7115;7116;7117;7118;7119;7120;7121	7120	1242		7	0	0	0	9441400	6590000	3455000	1573800	6339800	4037700
781	KTNESVSEPR	PSVTSKSRVSRLAGRKTNESVSEPRKGFMY	RLAGRKTNESVSEPRKGFMYSRNTNENPQE	R	K	T	P	R	K	10	1	1145.57	Q13433	Q13433	239	248	SLC39A6	Zinc transporter ZIP6	yes	yes	2	0.007615	116.52	0	0	0	0	0	0	6854100	0	0	579	858	4981	7122	7122	1088		1	0	0	0	0	0	0	885490	0	0
782	KVEAEALNATAIR	VVVRTDEDVPSAPPRKVEAEALNATAIRVL	PRKVEAEALNATAIRVLWRSPAPGRQHGQI	R	K	V	I	R	V	13	1	1384.77	D6W633;Q13332	D6W633	726	738	PTPRS	Receptor-type tyrosine-protein phosphatase S	yes	no	2	0.0016394	123.95	0	9032300	0	0	0	0	0	0	0	465	859	4982	7123	7123	819		1	0	7630500	0	0	0	0	0	0	0
787	LAGKPTHVNVSVVMAEVDGTCY	HEALPLAFTQKTIDRLAGKPTHVNVSVVMA	VNVSVVMAEVDGTCY_______________	R	L	A	C	Y	-	22	0	2346.13	A0A0G2JMB2;Q6MZV6;Q7Z374;Q6MZX9;Q6P089;Q6ZVX0;Q7Z379;Q9NPP6;Q9UP60;Q8NCL6;Q6N092;Q6ZW64;Q96K68;Q96DK0;Q8WY24;Q6N090;Q6MZW0;P01876	A0A0G2JMB2	319	340	DKFZp686L19235;DKFZp686C02218;DKFZp686M08189;IGH@;DKFZp686K04218;SNC73;DKFZp686K18196;DKFZp686G21220;DKFZp686J11235;IGHA1	Ig alpha-1 chain C region	yes	no	3	1.0148e-05	113.26	0	0	0	49623000	0	0	0	0	0	171	864	4994;4995	7135;7136;7137;7138	7137	336		4	0	0	0	24188000	0	0	0	0	0
789	LALNLTLR	NFNANHALSGLERDRLALNLTLRQLDQHLD	SGLERDRLALNLTLRQLDQHLDLLKHSNFL	R	L	A	L	R	Q	8	0	912.576	Q8N9Q8;Q15483;A0A024R319;P55268	Q8N9Q8	72	79	LAMB2	Laminin subunit beta-2	yes	no	2	1.572e-11	147.16	0	0	0	0	0	0	0	0	0	29	866	4998;4999	7141;7142	7142	39		2	0	0	0	0	0	0	0	0	0
790	LANLTQGEDQYYLR	SLLEQLNEQFNWVSRLANLTQGEDQYYLRV	RLANLTQGEDQYYLRVTTVASHTSDSDVPS	R	L	A	L	R	V	14	0	1682.83	A0A384NKS6;P10909;B4DW11;H0YC35;H0YAS8;Q8IWM0	A0A384NKS6	424	437	CLU	Clusterin;Clusterin beta chain;Clusterin alpha chain;Clusterin	yes	no	2;3	0	393.42	127250000000	171440000000	117130000000	38563000000	8441300000	30702000000	189410000000	191670000000	265160000000	250	867	5000;5001;5002;5003;5004;5005;5006;5007;5008;5009;5010;5011;5012;5013;5014;5015;5016;5017;5018;5019;5020;5021;5022;5023;5024;5025;5026;5027;5028;5029;5030;5031;5032;5033;5034;5035;5036;5037;5038;5039;5040;5041;5042;5043;5044;5045;5046;5047;5048;5049;5050;5051;5052;5053;5054;5055;5056;5057;5058;5059;5060;5061;5062;5063;5064;5065;5066;5067;5068;5069;5070;5071;5072;5073;5074;5075;5076;5077;5078;5079…	7143;7144;7145;7146;7147;7148;7149;7150;7151;7152;7153;7154;7155;7156;7157;7158;7159;7160;7161;7162;7163;7164;7165;7166;7167;7168;7169;7170;7171;7172;7173;7174;7175;7176;7177;7178;7179;7180;7181;7182;7183;7184;7185;7186;7187;7188;7189;7190;7191;7192;7193;7194;7195;7196;7197;7198;7199;7200;7201;7202;7203;7204;7205;7206;7207;7208;7209;7210;7211;7212;7213;7214;7215;7216;7217;7218;7219;7220;7221;7222…	7146	473		202	127250000000	144830000000	125580000000	18797000000	10288000000	26421000000	24470000000	14980000000	28777000000
792	LAVTNTTMTGTVLK	ETFRKLQLSGHAMPRLAVTNTTMTGTVLKM	RLAVTNTTMTGTVLKMTDR___________	R	L	A	L	K	M	14	0	1448.79	E9PRZ7;E9PR09;E9PN27;E9PIQ8;V5J3L2;G0XQ39;Q13586	E9PRZ7	93	106	STIM1	Stromal interaction molecule 1	yes	no	2	3.0811e-08	142.19	0	0	0	18525000	0	11442000	0	0	0	475	869	5128;5129	7354;7355	7354	845		2	0	0	0	9029700	0	9846400	0	0	0
793	LCAIDYCSFGNHSCQHECVSTPGGPR	SFDLIQEFGLQFQSRLCAIDYCSFGNHSCQ	HSCQHECVSTPGGPRCHCREGHDLQPDGRS	R	L	C	P	R	C	26	0	3008.24	A5D8U1	A5D8U1	213	238	MATN4		yes	yes	3;4	5.3072e-90	227.3	0	0	0	0	30802000	60324000	118000000	2942200000	0	280	870	5130;5131;5132;5133;5134	7356;7357;7358;7359;7360;7361;7362;7363;7364;7365;7366;7367;7368;7369	7368	523		14	0	0	0	0	37542000	51913000	15245000	229940000	0
794	LCDEGHGLEVEINCTR	YTDKAHFSSKCRRCRLCDEGHGLEVEINCT	CDEGHGLEVEINCTRTQNTKCRCKPNFFCN	R	L	C	T	R	T	16	0	1900.84	K9J972;E6Y7C4;F0UWG7;A0A1C6ZWA8;H7C5Z8;A0A087WTM9;B6VNV5;E6Y7C3;Q6ICT6;A0A1B0QZF0;Q59FU8;P25445	K9J972	106	121	FAS;TNFRSF6	Tumor necrosis factor receptor superfamily member 6	yes	no	3	0.00014958	91.457	0	0	0	0	0	0	0	0	0	123	871	5135	7370	7370	247		1	0	0	0	0	0	0	0	0	0
795	LCHNASLDDVLPIYAYGHAVGK	YGWRAKEGFACYDKKLCHNASLDDVLPIYA	DDVLPIYAYGHAVGKSVTGGYVYRGCESPN	K	L	C	G	K	S	22	0	2412.19	Q6UWX4	Q6UWX4	477	498	HHIPL2	HHIP-like protein 2	yes	yes	4	3.7655e-08	115.76	0	40447000	0	0	0	0	0	0	0	616	872	5136	7371	7371	1152		1	0	34170000	0	0	0	0	0	0	0
796	LCNECADGSFHLSTR	TSGEACRCKNNVVGRLCNECADGSFHLSTR	LCNECADGSFHLSTRNPDGCLKCFCMGVSR	R	L	C	T	R	N	15	0	1765.75	A0A024RAB6;P98160	A0A024RAB6	857	871	HSPG2	Basement membrane-specific heparan sulfate proteoglycan core protein;Endorepellin;LG3 peptide	yes	no	3	5.3726e-12	147.1	0	0	0	0	0	13179000	202730000	0	0	89	873	5137;5138	7372;7373;7374;7375;7376	7376	182		5	0	0	0	0	0	11341000	26191000	0	0
798	LCQGLGLNLTK	LGAMRMPSSHRILHKLCQGLGLNLTKFTQY	ILHKLCQGLGLNLTKFTQYDKNTWTEVHEV	K	L	C	T	K	F	11	0	1215.66	M0QYW8;A2RRH1;Q96RQ9	M0QYW8	90	100	IL4I1	L-amino-acid oxidase	yes	no	2	0.0044396	104.22	0	0	0	56405000	0	37836000	0	0	0	268	875	5140;5141;5142	7378;7379;7380	7378	507		3	0	0	0	27494000	0	32560000	0	0	0
799	LDAFFALEGFPTEPNSSSR	VTGVVLFRQLAPRAKLDAFFALEGFPTEPN	FALEGFPTEPNSSSRAIHVHQFGDLSQGCE	K	L	D	S	R	A	19	0	2083.99	A0A140VJU8;B2R9V7;P08294	A0A140VJU8	93	111	SOD3	Superoxide dismutase [Cu-Zn];Extracellular superoxide dismutase [Cu-Zn]	yes	no	2;3	2.2167e-127	267.93	2582100000	3215900000	2157500000	1552400000	162960000	319590000	444770000	13634000000	9822800000	197	876	5143;5144;5145;5146;5147;5148;5149;5150;5151;5152;5153;5154;5155;5156;5157;5158;5159	7381;7382;7383;7384;7385;7386;7387;7388;7389;7390;7391;7392;7393;7394;7395;7396;7397;7398;7399;7400;7401;7402;7403;7404;7405	7399	373		24	2582100000	2716800000	2313300000	756700000	198620000	275030000	57460000	1065500000	1066000000
801	LDFIILNETK	ALDKMLQNVQMPSKKLDFIILNETKFWYQM	MPSKKLDFIILNETKFWYQMILPPHFDKSK	K	L	D	T	K	F	10	0	1204.67	P27487	P27487	514	523	DPP4	Dipeptidyl peptidase 4;Dipeptidyl peptidase 4 membrane form;Dipeptidyl peptidase 4 soluble form	yes	yes	2	0.017967	85.377	0	0	0	0	0	0	0	0	0	556	879	5309	7654	7654	1019		1	0	0	0	0	0	0	0	0	0
804	LDGSTNFTR	DMETMGGGWTVLQARLDGSTNFTRTWQDYK	TVLQARLDGSTNFTRTWQDYKAGFGNLRRE	R	L	D	T	R	T	9	0	1009.48	Q53GD2;A4D1B8;Q14314	Q53GD2	258	266	FGL2	Fibroleukin	yes	no	2	0.0019429	138.4	0	0	0	0	23641000	10136000	134860000	440220000	259140000	276	882	5313;5314;5315;5316;5317;5318	7658;7659;7660;7661;7662;7663;7664;7665;7666;7667	7665	517		10	0	0	0	0	28813000	8722800	17423000	34404000	28123000
805	LDLPVNTSIPNVTEVK	YKCPVGRGESLPCVKLDLPVNTSIPNVTEV	DLPVNTSIPNVTEVKENMTFGSTLVTNPNG	K	L	D	V	K	E	16	0	1737.95	B4DTY8;P56199	B4DTY8	95	110	ITGA1	Integrin alpha-1	yes	no	2	1.5055e-17	190.34	0	0	0	23017000	0	0	0	73415000	0	391	883;884	5319;5320;5321	7668;7669;7670	7670	705;706		3	0	0	0	11219000	0	0	0	5737600	0
806	LDMSQNVSLVTAELSK	PWNFFMTATQYFTNRLDMSQNVSLVTAELS	DMSQNVSLVTAELSKDAQA___________	R	L	D	S	K	D	16	0	1733.89	C8KHU1;A0A2R8Y567;A0A2R8YEH8;A0A2R8Y801;A0A2R8Y854;A0A2R8YFI6;B7Z1J8;A0A2U3TZM5;A0A2U3TZM6;B7Z914;A0A2U3TZJ7;A0A2R8Y6D1;A0A220K8H0;Q99808	C8KHU1	43	58	SLC29A1	Equilibrative nucleoside transporter 1	yes	no	2	0	309.58	0	0	0	479910000	0	0	1097500000	2138700000	1084800000	221	885;886	5322;5323;5324;5325;5326;5327;5328;5329;5330;5331;5332;5333;5334	7671;7672;7673;7674;7675;7676;7677;7678;7679;7680;7681;7682;7683;7684	7684	417	42	12	0	0	0	233920000	0	0	141780000	167140000	117730000
807	LDNYSTQELGK	EDPSIKADINKWRIKLDNYSTQELGKTIVY	WRIKLDNYSTQELGKTIVYLDGSSQSCRFR	K	L	D	G	K	T	11	0	1266.61	H0Y7R7;Q6NZX3;Q53Z63;B2RBH2;P21589;H0Y3X5	H0Y7R7	96	106	NT5E	5-nucleotidase	yes	no	2	3.6527e-14	193.38	0	220240000	0	393820000	0	71009000	937870000	1675900000	1286400000	331	887	5335;5336;5337;5338;5339;5340;5341;5342;5343	7685;7686;7687;7688;7689;7690;7691;7692;7693;7694;7695	7695	610		11	0	186060000	0	191960000	0	61108000	121160000	130970000	139610000
808	LDPTVLDAGELANR	HVWAGGPWPQGATLRLDPTVLDAGELANRT	RLDPTVLDAGELANRTGSVPRFRLLEGPRH	R	L	D	N	R	T	14	0	1482.77	Q6UVK1;A2VCL1	Q6UVK1	2063	2076	CSPG4	Chondroitin sulfate proteoglycan 4	yes	no	2	1.5535e-31	221.55	125910000	72480000	52597000	189950000	0	49418000	1061700000	2204800000	690800000	615	888	5344;5345;5346;5347;5348;5349;5350;5351;5352;5353;5354;5355;5356;5357;5358;5359;5360	7696;7697;7698;7699;7700;7701;7702;7703;7704;7705;7706;7707;7708;7709;7710;7711;7712;7713;7714;7715;7716;7717;7718;7719	7714	1149		24	125910000	61232000	56394000	92587000	0	42527000	137160000	172310000	74970000
811	LEHSSSLPANVTGFNLIHR	NTGAQCPPSQQEGLKLEHSSSLPANVTGFN	SSLPANVTGFNLIHRLSLMKTSAIKKIRNP	K	L	E	H	R	L	19	0	2091.09	A6NCT7;Q07092	A6NCT7	38	56	COL16A1	Collagen alpha-1(XVI) chain	yes	no	3;4	5.5608e-91	250.47	32250000	23324000	23440000	43690000	42418000	48233000	125650000	423040000	394700000	286	892	5394;5395;5396;5397;5398;5399;5400;5401;5402;5403;5404;5405	7763;7764;7765;7766;7767;7768;7769;7770;7771;7772;7773;7774;7775;7776;7777;7778;7779	7764	536		17	32250000	19705000	25132000	21296000	51699000	41507000	16233000	33062000	42835000
815	LENLSSSEMGYTATLTR	GQPWCFFPPSYPSYKLENLSSSEMGYTATL	NLSSSEMGYTATLTRTTPTFFPKDILTLRL	K	L	E	T	R	T	17	0	1871.89	A0A024R8Q1;P10253;B7Z5V6;I3L0S5;I3L3L3	A0A024R8Q1	138	154	GAA	Lysosomal alpha-glucosidase;76 kDa lysosomal alpha-glucosidase;70 kDa lysosomal alpha-glucosidase	yes	no	2	6.6658e-127	278.36	19172000	0	0	24438000	0	0	86824000	200130000	91829000	71	896	5424;5425;5426;5427;5428	7802;7803;7804;7805;7806;7807;7808	7807	121		7	19172000	0	0	11912000	0	0	11217000	15641000	9965800
816	LENSTAPIR	ELWCRYLNPPKAWWKLENSTAPIRSPALIG	PKAWWKLENSTAPIRSPALIGCFIVDRQYF	K	L	E	I	R	S	9	0	999.535	B3KNV8;Q58A54;Q6P9A2	B3KNV8	318	326	GalNAc-T18;GALNT18	Polypeptide N-acetylgalactosaminyltransferase;Polypeptide N-acetylgalactosaminyltransferase 18	yes	no	2	0.011711	105.57	2238100	3899700	0	0	0	0	67263000	40166000	65426000	343	897	5429;5430;5431;5432;5433	7809;7810;7811;7812;7813	7812	626		5	2238100	3294500	0	0	0	0	8689800	3139100	7100500
817	LENWTDASR	ETKYIISLDQDSVVKLENWTDASRVDGVVL	QDSVVKLENWTDASRVDGVVLEKVQEDEFR	K	L	E	S	R	V	9	0	1090.5	A4QPA1;Q1WWL2;Q4QQP8;Q9P2B2;A0A024R0J4	A4QPA1	390	398	PTGFRN	Prostaglandin F2 receptor negative regulator	yes	no	2	0.002053	166.07	0	0	0	35139000	0	0	138140000	275840000	0	279	898	5434;5435;5436;5437;5438;5439	7814;7815;7816;7817;7818;7819	7817	521		6	0	0	0	17128000	0	0	17846000	21557000	0
818	LEPVHLQLQCMSQEQLAQVAANATK	ILAQQVWGTLVLLQRLEPVHLQLQCMSQEQ	MSQEQLAQVAANATKEFTEAFLGCPAIHPR	R	L	E	T	K	E	25	0	2806.41	Q96PD5	Q96PD5	346	370	PGLYRP2	N-acetylmuramoyl-L-alanine amidase	yes	yes	3	2.8249e-15	131.04	0	0	0	17365000	0	0	0	0	0	652	899	5440	7820	7820	1217		1	0	0	0	8464000	0	0	0	0	0
820	LEQLGGLLANVSGELGGR	APGGLSHWLPAARGRLEQLGGLLANVSGEL	LGGLLANVSGELGGRLDLLEEQVAGAMQAC	R	L	E	G	R	L	18	0	1781.96	Q9Y6C2	Q9Y6C2	446	463	EMILIN1	EMILIN-1	yes	yes	2	4.3396e-146	286.1	492040000	208800000	333210000	891820000	0	25993000	1406200000	0	1159200000	671	902	5487;5488;5489;5490;5491;5492;5493	7948;7949;7950;7951;7952;7953;7954;7955;7956	7948	1255		9	492040000	176390000	357270000	434700000	0	22368000	181660000	0	125800000
822	LESMPPGLPSSLMYLSLENNSISSIPEK	AKMEKLMQLNLCSNRLESMPPGLPSSLMYL	YLSLENNSISSIPEKYFDKLPKLHTLRMSH	R	L	E	E	K	Y	28	0	3032.51	B2R7N9;Q99983	B2R7N9	224	251	OMD	Osteomodulin	yes	no	3	1.1304e-22	133.58	0	0	0	25112000	0	24370000	0	0	0	324	904;905	5495;5496	7958;7959;7960;7961;7962	7961	596	65	5	0	0	0	12241000	0	20972000	0	0	0
823	LETTVNYTDSQRPICLPSK	QYKMAESGYDIALLKLETTVNYTDSQRPIC	VNYTDSQRPICLPSKGDRNVIYTDCWVTGW	K	L	E	S	K	G	19	0	2221.1	P03951	P03951	486	504	F11	Coagulation factor XI;Coagulation factor XIa heavy chain;Coagulation factor XIa light chain	yes	yes	2;3	5.4812e-46	211.7	0	0	0	0	0	16362000	0	90485000	138640000	527	906	5497;5498;5499;5500;5501	7963;7964;7965;7966;7967;7968	7966	941		6	0	0	0	0	0	14081000	0	7071600	15046000
824	LEWLGNCSGLNDETYGYK	DFNHERGERKVCRFKLEWLGNCSGLNDETY	LGNCSGLNDETYGYKEGKPCIIIKLNRVLG	K	L	E	Y	K	E	18	0	2117.94	V9GYR2;B7Z9S8;A6NGH2;Q6LEU2;A3KLL5;P05026	V9GYR2	97	114	ATP1B1	Sodium/potassium-transporting ATPase subunit beta-1	yes	no	2	4.7681e-189	300.55	0	65726000	44579000	92048000	0	0	1624600000	2068700000	1768500000	273	907	5502;5503;5504;5505;5506;5507;5508	7969;7970;7971;7972;7973;7974;7975;7976;7977;7978	7976	515		10	0	55525000	47798000	44867000	0	0	209880000	161670000	191930000
827	LFLGNYTGNVGNDALQYHNNTAFSTK	EYSHFVLGNELNSYRLFLGNYTGNVGNDAL	NDALQYHNNTAFSTKDKDNDNCLDKCAQLR	R	L	F	T	K	D	26	0	2858.36	O43827	O43827	249	274	ANGPTL7	Angiopoietin-related protein 7	yes	yes	3	3.0041e-54	187.81	12182000	0	0	120580000	35051000	24698000	0	1071000000	0	509	910;911	5515;5516;5517;5518;5519;5520	7987;7988;7989;7990;7991;7992;7993;7994;7995	7993	896;897;898		8	12182000	0	0	58772000	42720000	21254000	0	83703000	0
828	LFPNASQHITPSYNYAPNPDK	AAPHGPEDSAPQYSRLFPNASQHITPSYNY	QHITPSYNYAPNPDKHWIMRYTGPMKPIHM	R	L	F	D	K	H	21	0	2373.14	Q8IWU5	Q8IWU5	238	258	SULF2	Extracellular sulfatase Sulf-2	yes	yes	3	4.3147e-08	115.76	33143000	26022000	20563000	0	0	0	159000000	135800000	261750000	633	912	5521;5522;5523;5524;5525;5526	7996;7997;7998;7999;8000;8001;8002;8003;8004;8005;8006;8007;8008;8009	7997	1184		14	33143000	21983000	22048000	0	0	0	20541000	10613000	28406000
829	LFQNCSELFK	KEKRGLSGKYQTSSKLFQNCSELFKTQTFS	QTSSKLFQNCSELFKTQTFSGDFMHRLPLL	K	L	F	F	K	T	10	0	1284.62	A8K369;B4DN92;A8K285;A8K0M6;Q8NBN3	A8K369	63	72	TMEM87A	Transmembrane protein 87A	yes	no	2	0.00051581	156.92	0	0	0	50497000	0	14159000	87328000	253720000	84679000	292	913	5527;5528;5529;5530;5531;5532	8010;8011;8012;8013;8014;8015;8016;8017	8016	546		8	0	0	0	24614000	0	12185000	11282000	19829000	9189900
831	LFVLESQNGSQGLQLEAAR	LLLGLPRLSVRADGKLFVLESQNGSQGLQL	ESQNGSQGLQLEAARLSCKSRGAHLASADE	K	L	F	A	R	L	19	0	2059.07	B4DJ06	B4DJ06	40	58			yes	yes	2	1.0943e-65	233.37	0	10180000	0	19372000	0	0	98711000	101050000	0	370	915	5535;5536;5537;5538;5539	8020;8021;8022;8023;8024;8025;8026	8025	671		6	0	8600500	0	9442600	0	0	12753000	7897300	0
832	LGACNDTLQQLMEVFK	FLSPLSISTAFAMTKLGACNDTLQQLMEVF	GACNDTLQQLMEVFKFDTISEKTSDQIHFF	K	L	G	F	K	F	16	0	1865.9	A0A0K0Q2Z1;A0A024R944;A0A2S0BDD1;P01008;Q8TCE1	A0A0K0Q2Z1	124	139	SERPINC1	Antithrombin-III	yes	no	2;3	0	426.89	45107000	88503000	50647000	243860000	32343000	65549000	1056700000	3000000000	1641200000	77	916;917	5540;5541;5542;5543;5544;5545;5546;5547;5548;5549;5550;5551;5552	8027;8028;8029;8030;8031;8032;8033;8034;8035;8036;8037;8038;8039;8040;8041;8042;8043;8044;8045;8046;8047;8048;8049	8028	130	7	23	45107000	74768000	54304000	118870000	39419000	56410000	136520000	234450000	178120000
833	LGALNSSLQLLEDR	LLEKLVGGQAGLGRRLGALNSSLQLLEDRL	RLGALNSSLQLLEDRLHQLSLKDLTGPAGE	R	L	G	D	R	L	14	0	1527.83	Q9Y6C2;A0A0A0MT20	Q9Y6C2	790	803	EMILIN1	EMILIN-1	yes	no	2	8.5723e-192	308.55	615500000	423170000	454210000	533930000	225380000	300980000	3347700000	4281500000	3152300000	671	918	5553;5554;5555;5556;5557;5558;5559;5560;5561;5562;5563	8050;8051;8052;8053;8054;8055;8056;8057;8058;8059;8060;8061;8062;8063;8064;8065;8066;8067;8068;8069;8070;8071	8050	1256		21	615500000	357490000	487000000	260250000	274690000	259020000	432490000	334610000	342100000
835	LGDCISEDSYPDGNITWYR	IVSKALFLETEQLKKLGDCISEDSYPDGNI	ISEDSYPDGNITWYRNGKVLHPLEGAVVII	K	L	G	Y	R	N	19	0	2259.97	B4DX43;F5GXJ9;B3KNN9;Q13740	B4DX43	103	121	ALCAM	CD166 antigen	yes	no	2	3.3796e-77	239.19	0	0	0	0	0	0	0	90771000	0	342	920	5565	8073	8073	624		1	0	0	0	0	0	0	0	7093900	0
838	LGFLGNQSQGCLPAR	ICTNTVGSFKCGPCRLGFLGNQSQGCLPAR	LGFLGNQSQGCLPARTCHSPAHSPCHIHAH	R	L	G	A	R	T	15	0	1616.81	B3KQE1;F5H4Z8;Q53FK6;Q2HIZ0;P49746;B4DQH6	B3KQE1	208	222	THBS3	Thrombospondin-3	yes	no	2	1.145e-282	336.17	0	19880000	19939000	415120000	71591000	153250000	2812400000	6793600000	1309500000	345	924	5580;5581;5582;5583;5584;5585;5586;5587;5588	8094;8095;8096;8097;8098;8099;8100;8101;8102;8103;8104;8105;8106;8107	8106	632		14	0	16795000	21378000	202340000	87255000	131880000	363330000	530930000	142120000
840	LGLSFNSISAVDNGSLANTPHLR	RVDAASLKGLNNLAKLGLSFNSISAVDNGS	SAVDNGSLANTPHLRELHLDNNKLTRVPGG	K	L	G	L	R	E	23	0	2382.23	Q6FH10;P07585;A0A024RBG6;F8VNV6;H0YIH3	Q6FH10	250	272	DCN	Decorin	yes	no	2;3;4	0	398.14	13269000000	13317000000	8045900000	7688400000	4538800000	7424800000	65491000000	55407000000	73576000000	536	926;927	5592;5593;5594;5595;5596;5597;5598;5599;5600;5601;5602;5603;5604;5605;5606;5607;5608;5609;5610;5611;5612;5613;5614;5615;5616;5617;5618;5619;5620;5621;5622;5623;5624;5625;5626;5627;5628;5629;5630;5631;5632;5633;5634;5635;5636;5637;5638;5639;5640;5641;5642;5643;5644;5645;5646;5647;5648;5649;5650;5651;5652;5653;5654;5655;5656;5657;5658;5659;5660;5661;5662;5663;5664;5665;5666;5667;5668;5669;5670;5671…	8111;8112;8113;8114;8115;8116;8117;8118;8119;8120;8121;8122;8123;8124;8125;8126;8127;8128;8129;8130;8131;8132;8133;8134;8135;8136;8137;8138;8139;8140;8141;8142;8143;8144;8145;8146;8147;8148;8149;8150;8151;8152;8153;8154;8155;8156;8157;8158;8159;8160;8161;8162;8163;8164;8165;8166;8167;8168;8169;8170;8171;8172;8173;8174;8175;8176;8177;8178;8179;8180;8181;8182;8183;8184;8185;8186;8187;8188;8189;8190…	8143	964;965		195	13269000000	11250000000	8626800000	3747600000	5532000000	6389600000	8460800000	4330100000	7985000000
841	LGLTPEATNASLLGCMEDLSVNGQR	GGLDAEASRHLQEHRLGLTPEATNASLLGC	SLLGCMEDLSVNGQRRGLREALLTRNMAAG	R	L	G	Q	R	R	25	0	2645.28	Q6UVK1	Q6UVK1	340	364	CSPG4	Chondroitin sulfate proteoglycan 4	yes	yes	2	5.5263e-19	113.1	0	0	0	0	0	0	0	0	0	615	928	5729	8322	8322	1150;1151		1	0	0	0	0	0	0	0	0	0
843	LGNLTVTQAILK	LYTLVIPIRYYVRWRLGNLTVTQAILKKEN	RWRLGNLTVTQAILKKENPFSTSSAWLSDS	R	L	G	L	K	K	12	0	1269.77	Q687X5	Q687X5	321	332	STEAP4	Metalloreductase STEAP4	yes	yes	2	1.2369e-73	261.58	18207000	27418000	0	128430000	69336000	73891000	234030000	649680000	326640000	602	930	5733;5734;5735;5736;5737;5738;5739;5740;5741	8326;8327;8328;8329;8330;8331;8332;8333;8334;8335;8336;8337	8330	1126		12	18207000	23163000	0	62603000	84507000	63588000	30234000	50774000	35449000
844	LGNNVDFR	IQRVVGSATLQVAYKLGNNVDFRIPTRNLY	TLQVAYKLGNNVDFRIPTRNLYPSGLPEEY	K	L	G	F	R	I	8	0	933.467	A0A1B1SMR9;P20849	A0A1B1SMR9	89	96	COL9A1	Collagen alpha-1(IX) chain	yes	no	2	0.010852	112.17	0	0	0	0	0	10006000	0	0	0	212	931	5742	8338	8338	395		1	0	0	0	0	0	8610700	0	0	0
845	LGNWSAMPSCK	DGYSLDGPEEIECTKLGNWSAMPSCKASCK	ECTKLGNWSAMPSCKASCKVPVKKATVVYQ	K	L	G	C	K	A	11	0	1249.56	D9IWP9;A0A384NKM6;P02749;J3KS17;B4DPN0	D9IWP9	232	242	APOH	Beta-2-glycoprotein 1	yes	no	2	2.7167e-18	212.21	41479000	320610000	96237000	776510000	70825000	140170000	2022800000	6322600000	4754600000	249	932;933	5743;5744;5745;5746;5747;5748;5749;5750;5751;5752;5753;5754;5755;5756	8339;8340;8341;8342;8343;8344;8345;8346;8347;8348;8349;8350;8351;8352;8353;8354;8355;8356;8357;8358	8342	468	53	20	41479000	270850000	103190000	378500000	86321000	120630000	261330000	494120000	516000000
846	LGSFEGLVNLTFIHLQHNR	KSLEDLQLTHNKITKLGSFEGLVNLTFIHL	EGLVNLTFIHLQHNRLKEDAVSAAFKGLKS	K	L	G	N	R	L	19	0	2194.16	P51884;A0A384N669;Q53FV4	P51884	152	170	LUM	Lumican	yes	no	2;3;4	0	429.76	1470500000	1384000000	605830000	2378800000	7875800000	9697200000	6108000000	13178000000	13105000000	248	934;935	5757;5758;5759;5760;5761;5762;5763;5764;5765;5766;5767;5768;5769;5770;5771;5772;5773;5774;5775;5776;5777;5778;5779;5780;5781;5782;5783;5784;5785;5786;5787;5788;5789;5790;5791;5792;5793;5794;5795;5796;5797;5798;5799;5800;5801;5802;5803;5804;5805;5806;5807;5808;5809;5810;5811;5812;5813;5814;5815;5816;5817;5818;5819;5820;5821;5822;5823;5824;5825;5826;5827;5828;5829;5830;5831;5832;5833;5834;5835;5836…	8359;8360;8361;8362;8363;8364;8365;8366;8367;8368;8369;8370;8371;8372;8373;8374;8375;8376;8377;8378;8379;8380;8381;8382;8383;8384;8385;8386;8387;8388;8389;8390;8391;8392;8393;8394;8395;8396;8397;8398;8399;8400;8401;8402;8403;8404;8405;8406;8407;8408;8409;8410;8411;8412;8413;8414;8415;8416;8417;8418;8419;8420;8421;8422;8423;8424;8425;8426;8427;8428;8429;8430;8431;8432;8433;8434;8435;8436;8437;8438…	8437	463		144	1470500000	1169200000	649570000	1159500000	9599100000	8345100000	789100000	1029900000	1422300000
847	LGSYPVGGNVSFECEDGFILR	CPAPVSFENGIYTPRLGSYPVGGNVSFECE	GGNVSFECEDGFILRGSPVRQCRPNGMWDG	R	L	G	L	R	G	21	0	2315.09	E7ETN3;P06681;A0A0G2JL69;Q53GZ8;A0A1U9X8X9;A0A1U9X8X3;A0A1U9X8W4;Q53HP3;Q5JP69;B4DV48;Q95IG1;Q8N6L6;Q5ST52	E7ETN3	104	124	C2	Complement C2;Complement C2b fragment;Complement C2a fragment	yes	no	2	6.3847e-40	203.11	0	0	0	35725000	0	0	0	0	0	471	936	5842	8514;8515	8514	837		2	0	0	0	17413000	0	0	0	0	0
849	LHEITNETFR	QPLANLSNLDLTANRLHEITNETFRGLRRL	LTANRLHEITNETFRGLRRLERLYLGKNRI	R	L	H	F	R	G	10	0	1258.63	Q6EMK4	Q6EMK4	112	121	VASN	Vasorin	yes	yes	3	2.5056e-09	145.25	0	8161900	0	23840000	0	0	0	0	0	606	938	5848;5849;5850	8524;8525;8526	8526	1136		3	0	6895200	0	11621000	0	0	0	0	0
850	LHIAQPENNTHVALFK	LTIAQAPSSTEISLKLHIAQPENNTHVALF	HIAQPENNTHVALFKMYTSSDCRYEVTVKT	K	L	H	F	K	M	16	0	1830.97	Q75T13	Q75T13	551	566	PGAP1	GPI inositol-deacylase	yes	yes	3	0.0018672	77.746	0	0	0	10899000	0	0	0	0	0	622	939	5851	8527	8527	1168;1169		1	0	0	0	5312700	0	0	0	0	0
851	LHINHNNLTESVGPLPK	KIKGRVFSKLKQLKKLHINHNNLTESVGPL	INHNNLTESVGPLPKSLEDLQLTHNKITKL	K	L	H	P	K	S	17	0	1882.01	P51884;A0A384N669;Q53FV4	P51884	121	137	LUM	Lumican	yes	no	2;3;4	1.592e-276	330.42	9403200000	9156600000	3326400000	35499000000	35272000000	39215000000	137060000000	85690000000	112980000000	248	940;941;942	5852;5853;5854;5855;5856;5857;5858;5859;5860;5861;5862;5863;5864;5865;5866;5867;5868;5869;5870;5871;5872;5873;5874;5875;5876;5877;5878;5879;5880;5881;5882;5883;5884;5885;5886;5887;5888;5889;5890;5891;5892;5893;5894;5895;5896;5897;5898;5899;5900;5901;5902;5903;5904;5905;5906;5907;5908;5909;5910;5911;5912;5913;5914;5915;5916;5917;5918;5919;5920;5921;5922;5923;5924;5925;5926;5927;5928	8528;8529;8530;8531;8532;8533;8534;8535;8536;8537;8538;8539;8540;8541;8542;8543;8544;8545;8546;8547;8548;8549;8550;8551;8552;8553;8554;8555;8556;8557;8558;8559;8560;8561;8562;8563;8564;8565;8566;8567;8568;8569;8570;8571;8572;8573;8574;8575;8576;8577;8578;8579;8580;8581;8582;8583;8584;8585;8586;8587;8588;8589;8590;8591;8592;8593;8594;8595;8596;8597;8598;8599;8600;8601;8602;8603;8604;8605;8606;8607…	8622	460;461;462		100	9403200000	7735600000	3566500000	17303000000	42989000000	33747000000	17707000000	6696900000	12261000000
853	LHNQLLPNVTTVER	LWFGYDVKRAVEEPRLHNQLLPNVTTVERN	RLHNQLLPNVTTVERNIDQAVTAALETRHH	R	L	H	E	R	N	14	0	1632.89	B5MC36;Q6ISU8;A0A0C4DG87;A2VCM7;Q6NZY2;D3DW46;B5MC34;A0A140VJJ9;A0A024R1F4;Q14390;Q9BX51;P19440	B5MC36	153	166	GGT1;GGTLC2;GGTLA4;hCG_2010666;GGTLC1	Gamma-glutamyltransferase light chain 2;Gamma-glutamyltransferase light chain 1;Gamma-glutamyltranspeptidase 1;Gamma-glutamyltranspeptidase 1 heavy chain;Gamma-glutamyltranspeptidase 1 light chain	yes	no	3	0.014287	64.675	0	0	0	0	0	0	22614000	0	0	21	945	5933	8648	8648	24		1	0	0	0	0	0	0	2921500	0	0
855	LHVGNYNGTAGDALR	LYDQFYVANEFLKYRLHVGNYNGTAGDALR	LHVGNYNGTAGDALRFNKHYNHDLKFFTTP	R	L	H	L	R	F	15	0	1556.77	Q53GD2;A4D1B8;Q14314	Q53GD2	330	344	FGL2	Fibroleukin	yes	no	3	0.00058829	106.55	0	0	0	43174000	36620000	30939000	0	0	262010000	276	947	5936;5937;5938;5939;5940	8651;8652;8653;8654;8655;8656	8651	518		6	0	0	0	21044000	44632000	26625000	0	0	28435000
859	LISIGKWIADNQPR	TGDKEGQQRRIRQQRLISIGKWIADNQPRL	RLISIGKWIADNQPRLIQCENEVGKLLFIT	R	L	I	P	R	L	14	1	1609.89	B1ALB4;Q8NB69;Q96N31;Q6TV06;B4DLY0;E9PD50;Q92540	B1ALB4	417	430	SMG7;SGA56M	Protein SMG7	yes	no	2	0.012408	85.67	0	0	0	0	0	0	0	0	0	318	951	5944	8660	8660	589		1	0	0	0	0	0	0	0	0	0
861	LITEEANR	AAERGDAQQRLGQSRLITEEANRTTMEVQQ	QRLGQSRLITEEANRTTMEVQQATAPMANN	R	L	I	N	R	T	8	0	944.493	B7Z938;Q5D044;H0UI49;A0A0A0MTC7;A0A0A0MQS9;Q16363	B7Z938	736	743	LAMA4	Laminin subunit alpha-4	yes	no	2	0.0043629	128.48	0	0	0	76697000	0	0	189060000	509010000	0	148	953	5946;5947;5948	8662;8663;8664	8663	300		3	0	0	0	37385000	0	0	24425000	39780000	0
863	LKNNVMVIETWNK	SQVIPVSLSSKYLERLKNNVMVIETWNKVR	ERLKNNVMVIETWNKVRSPGQDKLLGLVKL	R	L	K	N	K	V	13	1	1587.84	Q4AC94	Q4AC94	874	886	C2CD3	C2 domain-containing protein 3	yes	yes	2	0.012397	88.496	0	0	0	0	0	0	198210000	196470000	0	592	955	5950;5951	8666;8667	8667	1107	111	2	0	0	0	0	0	0	25607000	15354000	0
864	LKNVVALDVEVATNR	______________________________	LKNVVALDVEVATNRIYWCDLSYRKIYSAY	M	L	K	N	R	I	15	1	1639.93	E9PP15;B3KU40	E9PP15	2	16	LRP8		yes	no	2	0.023336	68.551	0	0	0	0	0	0	0	0	0	354	956	5952	8668	8668	642		1	0	0	0	0	0	0	0	0	0
865	LKPINTTGTLKPDDR	______________________________	LKPINTTGTLKPDDRVVVAATRLDSRSFFW	M	L	K	D	R	V	15	0	1667.92	B4DJN0	B4DJN0	2	16			yes	yes	3	0.017401	60.246	0	0	0	10970000	0	0	0	0	0	372	957	5953;5954;5955	8669;8670;8671	8669	675		3	0	0	0	5347000	0	0	0	0	0
867	LLDKNSSGDIGK	PSHTLEERVVHWYFKLLDKNSSGDIGKKEI	YFKLLDKNSSGDIGKKEIKPFKRFLRKKSK	K	L	L	G	K	K	12	1	1245.66	B4DNB1;Q9H3U7	B4DNB1	35	46	SMOC2	SPARC-related modular calcium-binding protein 2	yes	no	2;3	9.0174e-26	221.44	0	13577000	0	0	0	0	53830000	0	143230000	380	959	5961;5962;5963;5964	8678;8679;8680;8681	8681	688		4	0	11470000	0	0	0	0	6954300	0	15544000
868	LLETVEYNISGAER	GIFETFTIEIIDSNRLLETVEYNISGAERT	RLLETVEYNISGAERTAHISGLPPSTDFIV	R	L	L	E	R	T	14	0	1592.8	P24821;J3QSU6;A0A024R884;Q4LE33;F5H7V9;D3YHM4;H0YGZ3	P24821	1478	1491	TNC;TNC variant protein	Tenascin	yes	no	1;2;3	0	395.9	0	17014000	0	6726300000	0	105400000	10079000000	54301000000	14537000000	553	960	5965;5966;5967;5968;5969;5970;5971;5972;5973;5974;5975;5976;5977;5978;5979;5980;5981;5982;5983;5984;5985;5986;5987;5988;5989;5990;5991;5992;5993;5994;5995;5996;5997;5998;5999;6000	8682;8683;8684;8685;8686;8687;8688;8689;8690;8691;8692;8693;8694;8695;8696;8697;8698;8699;8700;8701;8702;8703;8704;8705;8706;8707;8708;8709;8710;8711;8712;8713;8714;8715;8716;8717;8718;8719;8720;8721;8722;8723;8724;8725;8726;8727;8728;8729;8730;8731;8732;8733;8734;8735;8736;8737;8738;8739;8740;8741;8742;8743	8699	1002		58	0	14374000	0	3278600000	0	90705000	1302100000	4243800000	1577700000
869	LLFLKTNKSNGNITK	NDFHISDDEEKNPSKLLFLKTNKSNGNITK	LLFLKTNKSNGNITKDEPVCAIKNEEEMAP	K	L	L	T	K	D	15	2	1689.98	A8MSM7;Q6PH77;A0A0C4DG83;Q05CN5;A2VCS9;A2VCT0;B4DVG9;E7ETZ8;B9EJB6;Q49MG5	A8MSM7	17	31	MAP9	Microtubule-associated protein 9	yes	no	2	0.001864	89.548	0	0	33639000	0	0	0	0	0	0	163	961	6001	8744	8744	322;323;324		1	0	0	36068000	0	0	0	0	0	0
870	LLGVGEEVGGVLELFPINGSSVVER	GQACNFGLRHITILKLLGVGEEVGGVLELF	VLELFPINGSSVVEREDVPAHLVKDIRNYF	K	L	L	E	R	E	25	0	2568.38	A3KC71;Q76M96;C9J8I6;A8KA16	A3KC71	818	842	okuribin;CCDC80	Coiled-coil domain-containing protein 80	yes	no	2	1.2669e-228	302.32	0	0	0	0	0	0	0	566370000	716150000	272	962	6002;6003	8745;8746	8746	514		2	0	0	0	0	0	0	0	44263000	77721000
871	LLHALGGDDFLGMLNR	YRYQSHDYAFSSVEKLLHALGGDDFLGMLN	LHALGGDDFLGMLNRTLLETLQKA______	K	L	L	N	R	T	16	0	1740.9	C9JGT6;C9JM55;C9K055;F8W8W4;Q584P1;B7Z3Y2;B7Z8A2;Q9UHG3	C9JGT6	105	120	PCYOX1	Prenylcysteine oxidase 1	yes	no	2;3	9.051e-15	155.08	41804000	17436000	20383000	71863000	0	17436000	398950000	863360000	416080000	420	963;964	6004;6005;6006;6007;6008;6009;6010;6011;6012;6013;6014;6015	8747;8748;8749;8750;8751;8752;8753;8754;8755;8756;8757;8758;8759;8760;8761	8757	752	83	15	41804000	14730000	21855000	35028000	0	15005000	51541000	67473000	45156000
874	LLNATHQIGCQSSISGDTGVIHVVEK	RKIYIPLNKTAPCVRLLNATHQIGCQSSIS	SSISGDTGVIHVVEKEEDLQWVLTDGPNPP	R	L	L	E	K	E	26	0	2762.4	Q92542;B4DR82;Q5T209;Q5T211;Q5T210	Q92542	53	78	NCSTN	Nicastrin	yes	no	4	5.3776e-10	117.21	16191000	0	11838000	21452000	19136000	18286000	0	0	0	644	967	6019;6020;6021;6022;6023	8765;8766;8767;8768;8769;8770;8771;8772;8773;8774;8775;8776	8773	1204		12	16191000	0	12692000	10456000	23324000	15737000	0	0	0
876	LLNNLTSIK	DYPWRPALTPFEFQKLLNNLTSIKIRGTYS	PFEFQKLLNNLTSIKIRGTYSERSAGYLDD	K	L	L	I	K	I	9	0	1014.61	A0A024R972;P11047	A0A024R972	611	619	LAMC1	Laminin subunit gamma-1	yes	no	2	0.0019112	150.4	0	0	0	45024000	36145000	0	182660000	449210000	169480000	81	969	6026;6027;6028;6029;6030	8779;8780;8781;8782;8783	8781	161		5	0	0	0	21946000	44053000	0	23599000	35107000	18393000
877	LLNRNNEVWLIQK	DEKVYYTAGYNSPVKLLNRNNEVWLIQKNE	VKLLNRNNEVWLIQKNEPTKENEKKKKKKK	K	L	L	Q	K	N	13	1	1638.92	Q05DB4;Q9Y5Z4	Q05DB4	185	197	HEBP2	Heme-binding protein 2	yes	no	2	0.024738	81.95	0	10047000000	0	0	0	0	0	0	0	573	970	6031	8784	8784	1054;1055		0	0	8487500000	0	0	0	0	0	0	0
878	LLNTTDVYLLPSLNPDGFER	ELAAGYRRGDPRLVRLLNTTDVYLLPSLNP	DVYLLPSLNPDGFERAREGDCGFGDGGPSG	R	L	L	E	R	A	20	0	2276.17	O75976	O75976	170	189	CPD	Carboxypeptidase D	yes	yes	2	0.01266	63.062	0	0	0	0	0	0	0	0	0	518	971	6032	8785	8785	924		1	0	0	0	0	0	0	0	0	0
880	LLPAFNTTSGLPYPR	YNDELLQMAKQLGYKLLPAFNTTSGLPYPR	LLPAFNTTSGLPYPRINLKFGIRKPEARTG	K	L	L	P	R	I	15	0	1645.88	A0A024R931;Q9BZQ6	A0A024R931	190	204	C1orf22;EDEM3	alpha-1,2-Mannosidase;ER degradation-enhancing alpha-mannosidase-like protein 3	yes	no	2	0.0011162	100.55	0	0	0	0	0	0	0	0	0	76	973	6034	8787	8787	129		1	0	0	0	0	0	0	0	0	0
883	LLQVVYLHSNNITK	NNKLARVPSGLPDLKLLQVVYLHSNNITKV	KLLQVVYLHSNNITKVGVNDFCPMGFGVKR	K	L	L	T	K	V	14	0	1640.92	A6NLG9;B4DDQ2;Q53FI4;A8K7E0;P21810;B3KS75;Q53HU6;Q8NAB7;B4DNL4;B4DQD6;B4DDN7	A6NLG9	240	253	BGN	Biglycan	yes	no	2;3	9.0909e-154	297.18	38546000000	53663000000	42798000000	34297000000	20254000000	13961000000	71379000000	50575000000	46162000000	288	976;977	6037;6038;6039;6040;6041;6042;6043;6044;6045;6046;6047;6048;6049;6050;6051;6052;6053;6054;6055;6056;6057;6058;6059;6060;6061;6062;6063;6064;6065;6066;6067;6068;6069;6070;6071;6072;6073;6074;6075;6076;6077;6078;6079;6080;6081;6082;6083;6084;6085;6086;6087;6088;6089;6090;6091;6092;6093;6094;6095;6096;6097;6098;6099;6100;6101;6102;6103;6104;6105;6106;6107;6108;6109;6110;6111;6112;6113;6114;6115;6116…	8790;8791;8792;8793;8794;8795;8796;8797;8798;8799;8800;8801;8802;8803;8804;8805;8806;8807;8808;8809;8810;8811;8812;8813;8814;8815;8816;8817;8818;8819;8820;8821;8822;8823;8824;8825;8826;8827;8828;8829;8830;8831;8832;8833;8834;8835;8836;8837;8838;8839;8840;8841;8842;8843;8844;8845;8846;8847;8848;8849;8850;8851;8852;8853;8854;8855;8856;8857;8858;8859;8860;8861;8862;8863;8864;8865;8866;8867;8868;8869…	8814	539;540		201	38546000000	45335000000	45888000000	16717000000	24686000000	12015000000	9221500000	3952600000	5009700000
884	LLSTEGSQNITYHCK	NLAPNTANVQMTFLRLLSTEGSQNITYHCK	LLSTEGSQNITYHCKNSIAYLDEAAGNLKK	R	L	L	C	K	N	15	0	1749.84	P02458	P02458	1380	1394	COL2A1	Collagen alpha-1(II) chain;Collagen alpha-1(II) chain;Chondrocalcin	yes	yes	2;3	6.3927e-47	228.12	0	0	0	471980000	512940000	0	1910700000	6312800000	6125000000	523	978	6199;6200;6201;6202;6203;6204;6205;6206;6207;6208;6209;6210;6211;6212;6213;6214;6215;6216;6217;6218;6219	9006;9007;9008;9009;9010;9011;9012;9013;9014;9015;9016;9017;9018;9019;9020;9021;9022;9023;9024;9025;9026;9027;9028;9029;9030;9031;9032;9033	9026	935		27	0	0	0	230060000	625170000	0	246850000	493360000	664720000
891	LNAINITSALDR	GDFLGAVKNVWQPERLNAINITSALDRGGR	PERLNAINITSALDRGGRVPLPINDLKEGV	R	L	N	D	R	G	12	0	1299.71	A0A2R8Y5L4;A0A2R8Y2R1;A0A2R8Y4E3;A0A2R8Y4X1;A0A2R8Y6U6;A0A2R8YH84;A0A2R8Y5X5;A0A2R8Y5J3;A0A2R8Y4P8;B7Z2R4;A0A2R8YD68;A0A2R8YGQ3;A0A2R8Y652;A0A2R8YEY2;A0A2R8Y5J6;A0A2R8Y5X0;A0A2R8Y638;A0A2R8Y5R7;A0A2R8Y5M2;A0A2R8YE48;A0A2R8YFA5;A0A2R8Y5Q3;A0A2R8Y7J1;A0A2R8Y6S4;A0A2R8Y5P8;A0A2R8Y6Y5;A0A2R8Y7Q5;A0A2R8Y6G8;A0A2R8Y448;A0A2R8Y6D4;B4DP78;E9PEH6;A0A2R8Y5H7;A0A2R8YE16;A0A2R8YE99;A0A2R8Y821;A0A2R8Y416;A0A2…	A0A2R8Y5L4	51	62	SGCE	Epsilon-sarcoglycan	yes	no	2	1.202e-05	137.17	0	0	0	13837000	0	0	0	0	0	185	986	6245;6246;6247;6248	9064;9065;9066;9067	9065	358		4	0	0	0	6744700	0	0	0	0	0
892	LNASIADLQSQLR	RGINASSMAWARLHRLNASIADLQSQLRSP	HRLNASIADLQSQLRSPLGPRHETAQQLEV	R	L	N	L	R	S	13	0	1427.77	O15230	O15230	2208	2220	LAMA5	Laminin subunit alpha-5	yes	yes	2	2.8073e-10	187.31	0	0	0	24137000	0	0	0	110830000	0	505	987	6249;6250	9068;9069;9070	9070	890		3	0	0	0	11765000	0	0	0	8661800	0
893	LNEASFQPPPGVNICDVNWK	TENKTVTATFGYPFRLNEASFQPPPGVNIC	FQPPPGVNICDVNWKDYVLIGDYSSSAQFY	R	L	N	W	K	D	20	0	2284.09	A0A0U1RQT9;C9JYN0;A8K865;A4D0R1;Q16563	A0A0U1RQT9	44	63	SYPL1;SYPL	Synaptophysin-like protein 1	yes	no	2;3	2.518e-104	255.91	0	0	193480000	199370000	0	0	765880000	1089000000	683120000	189	988	6251;6252;6253;6254;6255;6256	9071;9072;9073;9074;9075;9076;9077;9078;9079;9080;9081	9081	363		10	0	0	207450000	97180000	0	0	98945000	85110000	74136000
894	LNETLGTR	ELARDAEAVNEKAIKLNETLGTRDEAFERN	VNEKAIKLNETLGTRDEAFERNLEGLQKEI	K	L	N	T	R	D	8	0	902.482	A0A087WYF1;A0A087WX80;P24043;Q59H37	A0A087WYF1	1699	1706	LAMA2	Laminin subunit alpha-2	yes	no	2	0.0033655	138.54	0	0	0	8863300	0	0	90778000	39883000	50673000	133	989	6257;6258;6259;6260	9082;9083;9084;9085;9086	9085	258		5	0	0	0	4320200	0	0	11728000	3116900	5499400
895	LNFTGPGDPDSIR	RECIESGPGCTWCQKLNFTGPGDPDSIRCD	QKLNFTGPGDPDSIRCDTRPQLLMRGCAAD	K	L	N	I	R	C	13	0	1387.67	Q8WWJ8;Q59H50;D3DSM0;J3KNI6;P05107;E5RFI0;E5RIG7;E5RK25;E7EVZ9	Q8WWJ8	49	61	ITGB2	Integrin beta;Integrin beta-2	yes	no	2	4.8203e-12	190.15	0	0	0	34950000	0	0	0	152560000	143370000	460	990	6261;6262;6263;6264	9087;9088;9089;9090	9087	813		4	0	0	0	17036000	0	0	0	11923000	15560000
896	LNGSNTQCQVVR	PGPPVHPEELQHTNRLNGSNTQCQVVRCHL	TNRLNGSNTQCQVVRCHLGQLAKGTEVSVG	R	L	N	V	R	C	12	0	1374.67	B4E282;O75578	B4E282	907	918	ITGA10	Integrin alpha-10	yes	no	2	2.9029e-86	265.55	3388400	5876200	4865100	0	0	0	77825000	126890000	63156000	408	991	6265;6266;6267;6268;6269;6270	9091;9092;9093;9094;9095;9096	9096	735		6	3388400	4964200	5216300	0	0	0	10054000	9916700	6854100
897	LNGTDPIVAADSK	LYWADAKLSVIGSIRLNGTDPIVAADSKRG	IRLNGTDPIVAADSKRGLSHPFSIDVFEDY	R	L	N	S	K	R	13	0	1299.67	Q07954;Q59FG2	Q07954	4074	4086	LRP1	Prolow-density lipoprotein receptor-related protein 1;Low-density lipoprotein receptor-related protein 1 85 kDa subunit;Low-density lipoprotein receptor-related protein 1 515 kDa subunit;Low-density lipoprotein receptor-related protein 1 intracellular domain	yes	no	2	2.2742e-12	194.06	13285000	22543000	13164000	103960000	10369000	51814000	0	856190000	389740000	575	992	6271;6272;6273;6274;6275;6276;6277;6278	9097;9098;9099;9100;9101;9102;9103;9104;9105	9100	1070		8	13285000	19045000	14115000	50671000	12638000	44589000	0	66913000	42297000
898	LNLDGSNYTLLK	EEPFLIFANRYYLRKLNLDGSNYTLLKQGL	LRKLNLDGSNYTLLKQGLNNAVALDFDYRE	K	L	N	L	K	Q	12	0	1349.72	Q07954;Q59FG2	Q07954	3042	3053	LRP1	Prolow-density lipoprotein receptor-related protein 1;Low-density lipoprotein receptor-related protein 1 85 kDa subunit;Low-density lipoprotein receptor-related protein 1 515 kDa subunit;Low-density lipoprotein receptor-related protein 1 intracellular domain	yes	no	2	9.7728e-19	211.64	35277000	51139000	25704000	326880000	48770000	95045000	592130000	1161000000	640870000	575	993	6279;6280;6281;6282;6283;6284;6285;6286;6287;6288	9106;9107;9108;9109;9110;9111;9112;9113;9114;9115;9116;9117;9118;9119	9118	1071		14	35277000	43203000	27560000	159330000	59441000	81793000	76498000	90733000	69552000
899	LNLSENYTLSISNAR	KKSVQYDDVPEYKDRLNLSENYTLSISNAR	LNLSENYTLSISNARISDEKRFVCMLVTED	R	L	N	A	R	I	15	0	1693.86	B4DX43;F5GXJ9;B3KNN9;Q13740	B4DX43	39	53	ALCAM	CD166 antigen	yes	no	2	3.8046e-05	125.28	0	0	0	9755600	0	0	0	0	0	342	994	6289	9120	9120	625		1	0	0	0	4755100	0	0	0	0	0
900	LNLTAAR	RVDAQDETAAEFTLRLNLTAARLGQLEGLL	TAAEFTLRLNLTAARLGQLEGLLQAHGDEG	R	L	N	A	R	L	7	0	757.445	Q9Y6C2	Q9Y6C2	560	566	EMILIN1	EMILIN-1	yes	yes	2	4.747e-17	158.53	0	0	0	665970000	0	0	0	0	0	671	995	6290;6291;6292;6293;6294;6295	9121;9122;9123;9124;9125;9126	9124	1257		5	0	0	0	324610000	0	0	0	0	0
901	LNLTHCQDINECLTLGLCK	VIENGQLECPQGYKRLNLTHCQDINECLTL	HCQDINECLTLGLCKDAECVNTRGSYLCTC	R	L	N	C	K	D	19	0	2301.09	Q59EE6;G3V511;G3V3X5;Q6AZ94;Q14767	Q59EE6	494	512	LTBP2	Latent-transforming growth factor beta-binding protein 2	yes	no	3	2.2795e-11	124.98	0	0	0	19742000	0	0	0	0	0	484	996	6296	9127	9127	856		1	0	0	0	9623000	0	0	0	0	0
903	LNNETRPSVQEDSQAFNPDNPYHQQEGESMTFDPR	KRPHSGPRSNPGAGRLNNETRPSVQEDSQA	PYHQQEGESMTFDPRLDHEGICCIECRRSY	R	L	N	P	R	L	35	0	4076.78	O75829	O75829	241	275	LECT1	Leukocyte cell-derived chemotaxin 1;Chondrosurfactant protein;Chondromodulin-1	yes	yes	3;4	7.5441e-149	251.04	49690000	238940000	124000000	129930000	0	0	1361900000	2594400000	1239400000	517	998;999;1000	6298;6299;6300;6301;6302;6303;6304;6305;6306;6307;6308;6309;6310;6311;6312;6313	9129;9130;9131;9132;9133;9134;9135;9136;9137;9138;9139;9140;9141;9142;9143;9144;9145;9146;9147;9148;9149;9150;9151;9152;9153;9154;9155	9144	922;923	98	25	49690000	201850000	132960000	63330000	0	0	175940000	202750000	134500000
904	LNNLTFLYLDHNALESVPLNLPESLR	NKIKSRGIKANAFKKLNNLTFLYLDHNALE	NALESVPLNLPESLRVIHLQFNNIASITDD	K	L	N	L	R	V	26	0	2994.58	A8K0R3;B4DI63;P20774;Q7Z532	A8K0R3	212	237	OGN	Mimecan	yes	no	2;3;4	0	428.61	167610000	876850000	475280000	1794100000	3927200000	2789800000	9275400000	17172000000	65595000000	293	1001;1002;1003	6314;6315;6316;6317;6318;6319;6320;6321;6322;6323;6324;6325;6326;6327;6328;6329;6330;6331;6332;6333;6334;6335;6336;6337;6338;6339;6340;6341;6342;6343;6344;6345;6346;6347;6348;6349;6350;6351;6352;6353;6354;6355;6356;6357	9156;9157;9158;9159;9160;9161;9162;9163;9164;9165;9166;9167;9168;9169;9170;9171;9172;9173;9174;9175;9176;9177;9178;9179;9180;9181;9182;9183;9184;9185;9186;9187;9188;9189;9190;9191;9192;9193;9194;9195;9196;9197;9198;9199;9200;9201;9202;9203;9204;9205;9206;9207;9208;9209;9210;9211;9212;9213;9214;9215;9216;9217;9218;9219;9220;9221;9222;9223;9224;9225;9226;9227;9228;9229;9230;9231;9232;9233;9234;9235	9177	548;549;550		80	167610000	740770000	509600000	874490000	4786500000	2400800000	1198300000	1342000000	7118800000
905	LNNTNIR	APTLWIKHLVIKDSKLNNTNIRNSEKVYSC	HLVIKDSKLNNTNIRNSEKVYSCDQERQSA	K	L	N	I	R	N	7	0	843.456	A0A024R6E0;Q9H4F8	A0A024R6E0	213	219	SMOC1	SPARC-related modular calcium-binding protein 1	yes	no	1;2	0.014507	166.34	0	37559000	7692300	264290000	127290000	0	0	1024000000	1216900000	49	1004	6358;6359;6360;6361;6362;6363;6364	9236;9237;9238;9239;9240;9241;9242	9241	81		5	0	31730000	8247700	128820000	155140000	0	0	80026000	132070000
906	LNPTVTYGNDSFSAK	PVSEAQVHLALGDQRLNPTVTYGNDSFSAK	LNPTVTYGNDSFSAKASVSVTAEDEGTQRL	R	L	N	A	K	A	15	0	1612.77	B4DNT6;B4DQW5;Q5NKV8;A0A384MEK5;P05362;Q15463;E7ESS4;B4DW82	B4DNT6	169	183	ICAM1;P3.58	Intercellular adhesion molecule 1	yes	no	2	8.0575e-14	155.88	64664000	70637000	33687000	0	13895000	51322000	453110000	877430000	508850000	246	1005	6365;6366;6367;6368;6369;6370;6371;6372	9243;9244;9245;9246;9247;9248;9249;9250;9251;9252;9253;9254;9255;9256	9251	457		14	64664000	59674000	36119000	0	16936000	44166000	58537000	68573000	55224000
907	LNQTEPVAGNYYPVNTR	REILERRRDYRPTWKLNQTEPVAGNYYPVN	QTEPVAGNYYPVNTRIYITDGNMQLTVLTD	K	L	N	T	R	I	17	0	1934.95	B4E0K9;Q59E90;A8K6A7;O00754	B4E0K9	704	720	MAN2B1	Alpha-mannosidase;Lysosomal alpha-mannosidase;Lysosomal alpha-mannosidase A peptide;Lysosomal alpha-mannosidase B peptide;Lysosomal alpha-mannosidase C peptide;Lysosomal alpha-mannosidase D peptide;Lysosomal alpha-mannosidase E peptide	yes	no	2	1.7499e-14	148.52	0	0	0	12041000	0	0	0	0	0	300	1006	6373	9257	9257	559		1	0	0	0	5869000	0	0	0	0	0
908	LNTTTANTATVEVLAPSAR	AAPNGIILAYQITHRLNTTTANTATVEVLA	TANTATVEVLAPSARQYTATGLKPESVYLF	R	L	N	A	R	Q	19	0	1929.02	Q58EX2;H7C2P2	Q58EX2	1340	1358	SDK2	Protein sidekick-2	yes	no	2	5.9433e-120	267.11	0	0	4801000	13750000	0	0	62829000	150030000	0	594	1007	6374;6375;6376;6377	9258;9259;9260;9261;9262;9263	9261	1113		6	0	0	5147700	6702000	0	0	8117000	11725000	0
909	LNWTAADNAYEHFVIQVQEVNK	LGDLAVSEVGWDGLRLNWTAADNAYEHFVI	NAYEHFVIQVQEVNKVEAAQNLTLPGSLRA	R	L	N	N	K	V	22	0	2588.27	P24821;E9PC84;J3QSU6;A0A024R884;Q4LE33;A7MBN2	P24821	1365	1386	TNC;TNC variant protein	Tenascin	yes	no	2;3	6.1809e-66	221.13	0	0	0	2035000000	310070000	482850000	128040000	747420000	2173000000	553	1008;1009	6378;6379;6380;6381;6382;6383;6384;6385;6386;6387;6388;6389;6390;6391;6392;6393;6394;6395	9264;9265;9266;9267;9268;9269;9270;9271;9272;9273;9274;9275;9276;9277;9278;9279;9280;9281;9282;9283;9284;9285;9286;9287;9288;9289;9290	9287	1003;1004		27	0	0	0	991900000	377910000	415520000	16542000	58412000	235820000
910	LNWTAADQAYEHFIIQVQEANK	LENLTVTEVGWDGLRLNWTAADQAYEHFII	QAYEHFIIQVQEANKVEAARNLTVPGSLRA	R	L	N	N	K	V	22	0	2588.27	P24821;E9PC84;J3QSU6;A0A024R884;Q4LE33;A7MBN2;H0YGZ3	P24821	1092	1113	TNC;TNC variant protein	Tenascin	yes	no	2;3	9.4194e-170	286.68	0	0	0	3206400000	521890000	1025300000	812710000	0	5037700000	553	1010	6396;6397;6398;6399;6400;6401;6402;6403;6404;6405;6406;6407;6408;6409;6410;6411;6412;6413;6414;6415;6416;6417;6418;6419;6420;6421;6422;6423;6424;6425;6426;6427;6428	9291;9292;9293;9294;9295;9296;9297;9298;9299;9300;9301;9302;9303;9304;9305;9306;9307;9308;9309;9310;9311;9312;9313;9314;9315;9316;9317;9318;9319;9320;9321;9322;9323;9324;9325;9326;9327;9328;9329;9330;9331;9332;9333;9334;9335;9336;9337;9338;9339;9340;9341;9342;9343;9344;9345;9346	9339	1005		54	0	0	0	1562900000	636080000	882310000	105000000	0	546720000
911	LNWTTPDGTYDQFTIQVQEADQVEEAHNLTVPGSLR	MGNLTVTEVSWDALRLNWTTPDGTYDQFTI	QVEEAHNLTVPGSLRSMEIPGLRAGTPYTV	R	L	N	L	R	S	36	0	4071.95	P24821;E9PC84;A0A024R884;Q4LE33;A7MBN2	P24821	1274	1309	TNC;TNC variant protein	Tenascin	yes	no	3	2.549e-77	173.2	0	0	0	60985000	0	0	0	280270000	0	553	1011	6429;6430	9347;9348;9349;9350	9348	1006;1007		4	0	0	0	29726000	0	0	0	21903000	0
912	LNYSLPTGQWVGVQLPR	TLLWKTPLAKFDRYRLNYSLPTGQWVGVQL	YSLPTGQWVGVQLPRNTTSYVLRGLEPGQE	R	L	N	P	R	N	17	0	1927.03	P24821;E9PC84;J3QSU6;A0A024R884;Q4LE33;A7MBN2;F5H7V9;D3YHM4	P24821	1017	1033	TNC;TNC variant protein	Tenascin	yes	no	2;3	2.5618e-145	281.32	518350000	417410000	77979000	10312000000	1677800000	2161700000	17800000000	25807000000	18534000000	553	1012	6431;6432;6433;6434;6435;6436;6437;6438;6439;6440;6441;6442;6443	9351;9352;9353;9354;9355;9356;9357;9358;9359;9360;9361;9362;9363;9364;9365;9366;9367;9368;9369;9370;9371;9372;9373;9374;9375;9376;9377;9378;9379;9380;9381;9382	9357	1008		32	518350000	352630000	83610000	5026300000	2045000000	1860300000	2299600000	2016900000	2011400000
913	LNYTLSQGHR	TCKEATDVIIIHSKKLNYTLSQGHRVVLRG	IHSKKLNYTLSQGHRVVLRGVGGSQPPDID	K	L	N	H	R	V	10	0	1187.6	A0A024RC61;Q59E93;P15144	A0A024RC61	127	136	ANPEP	Aminopeptidase N	yes	no	2;3	5.1199e-31	230.24	0	0	0	180460000	32852000	51219000	0	314960000	0	99	1013	6444;6445;6446;6447;6448;6449	9383;9384;9385;9386;9387;9388	9383	219		6	0	0	0	87959000	40040000	44077000	0	24614000	0
914	LPEMAQPVDPAHNVSR	KHLDHEVAKPARRKRLPEMAQPVDPAHNVS	PEMAQPVDPAHNVSRLHRLPRDCQELFQVG	R	L	P	S	R	L	16	0	1759.87	Q9BY76	Q9BY76	165	180	ANGPTL4	Angiopoietin-related protein 4	yes	yes	2;3	9.1202e-15	168.61	48822000	89636000	46653000	10309000	18639000	51124000	0	0	0	658	1014	6450;6451;6452;6453;6454;6455;6456;6457;6458;6459	9389;9390;9391;9392;9393;9394;9395;9396;9397;9398;9399;9400;9401	9394	1224		13	48822000	75725000	50022000	5025100	22717000	43996000	0	0	0
917	LPHDCFQNATNSFYYDVGR	DETPCNPVPESYLIRLPHDCFQNATNSFYY	CFQNATNSFYYDVGRCPVKTCAGQQDNGIR	R	L	P	G	R	C	19	0	2303.01	O75339	O75339	413	431	CILP	Cartilage intermediate layer protein 1;Cartilage intermediate layer protein 1 C1;Cartilage intermediate layer protein 1 C2	yes	yes	2;3;4	0	458.41	9102100000	20920000000	17608000000	2773900000	70583000	810390000	68982000000	43520000000	68426000000	515	1018;1019	6474;6475;6476;6477;6478;6479;6480;6481;6482;6483;6484;6485;6486;6487;6488;6489;6490;6491;6492;6493;6494;6495;6496;6497;6498;6499;6500;6501;6502;6503;6504;6505;6506;6507;6508;6509;6510;6511;6512;6513;6514	9421;9422;9423;9424;9425;9426;9427;9428;9429;9430;9431;9432;9433;9434;9435;9436;9437;9438;9439;9440;9441;9442;9443;9444;9445;9446;9447;9448;9449;9450;9451;9452;9453;9454;9455;9456;9457;9458;9459;9460;9461;9462;9463;9464;9465;9466;9467;9468;9469;9470;9471;9472;9473;9474;9475;9476;9477;9478;9479;9480;9481;9482;9483;9484;9485;9486;9487;9488;9489;9490;9491;9492;9493;9494;9495;9496;9497;9498;9499;9500…	9485	912;913		83	9102100000	17673000000	18879000000	1352100000	86027000	697390000	8911800000	3401200000	7426100000
918	LPPGLLANFTLLR	KALGHLDLSGNRLRKLPPGLLANFTLLRTL	RKLPPGLLANFTLLRTLDLGENQLETLPPD	K	L	P	L	R	T	13	0	1423.86	B4E1I8;Q68CK4;P02750	B4E1I8	162	174	HMFT1766;LRG1	Leucine-rich alpha-2-glycoprotein	yes	no	2	9.3016e-09	147.91	0	0	0	9343400	0	0	0	299980000	333620000	405	1020	6515;6516;6517;6518	9508;9509;9510;9511	9510	729		4	0	0	0	4554200	0	0	0	23444000	36207000
920	LPTQNITFQTESSVAEQEAEFQSPK	QDRGPDVLTATVSGKLPTQNITFQTESSVA	ESSVAEQEAEFQSPKYIFHNFMERLWAYLT	K	L	P	P	K	Y	25	0	2808.35	B7Z8Q7;Q68DH2;B7Z551;Q59FS1;H7C0L5;B7Z544;B2RMS9;B7ZKJ8;Q14624	B7Z8Q7	425	449	DKFZp686G21125;ITIH4	Inter-alpha-trypsin inhibitor heavy chain H4;70 kDa inter-alpha-trypsin inhibitor heavy chain H4;35 kDa inter-alpha-trypsin inhibitor heavy chain H4	yes	no	2;3	0	380.73	0	73641000	0	80469000	0	0	575480000	1680200000	1152100000	335	1022	6528;6529;6530;6531;6532;6533	9524;9525;9526;9527;9528;9529;9530;9531;9532;9533;9534;9535;9536	9529	615		13	0	62212000	0	39223000	0	0	74347000	131310000	125030000
922	LQEAEEHVEAVNAK	RTEELEEAKKKLAQRLQEAEEHVEAVNAKC	RLQEAEEHVEAVNAKCASLEKTKQRLQNEV	R	L	Q	A	K	C	14	0	1565.77	P13535	P13535	1400	1413	MYH8	Myosin-8	yes	yes	2	0.016791	71.349	22568000	27504000	0	9346100	0	0	0	0	0	544	1024	6535;6536;6537	9538;9539;9540	9538	982		3	22568000	23236000	0	4555600	0	0	0	0	0
924	LQILNASSDVLR	VVVRTAPEPVGRVSRLQILNASSDVLRITW	VSRLQILNASSDVLRITWVGVTGATAYRLA	R	L	Q	L	R	I	12	0	1327.75	Q02388	Q02388	782	793	COL7A1	Collagen alpha-1(VII) chain	yes	yes	2	0.0056848	96.342	0	0	0	12114000	0	8497900	0	0	0	569	1026	6539;6540	9542;9543	9542	1047		2	0	0	0	5904900	0	7313100	0	0	0
925	LQNNENNISCVER	LEGDTVQIICNTGYRLQNNENNISCVERGW	YRLQNNENNISCVERGWSTPPKCRSTDTSC	R	L	Q	E	R	G	13	0	1588.73	Q03591;A0A3B3IRW0;A0A3B3IS00;V9GYE7;B1AKG0;A0A3B3IQ51;P36980	Q03591	120	132	CFHR1;CFHR2	Complement factor H-related protein 1;Complement factor H-related protein 2	yes	no	2	2.3976e-93	269.33	15699000	147070000	113370000	750710000	42182000	119910000	2904100000	3639700000	2001300000	571	1027	6541;6542;6543;6544;6545;6546;6547;6548;6549	9544;9545;9546;9547;9548;9549;9550;9551;9552;9553;9554	9554	1049		11	15699000	124240000	121560000	365920000	51412000	103190000	375180000	284450000	217190000
926	LQNNISYQMADIHHLK	AREGLGKRCEDDKVKLQNNISYQMADIHHL	QNNISYQMADIHHLKEQLAELRQEFLRQED	K	L	Q	L	K	E	16	0	1923.96	A0A024R5S2;A8K4R1;Q6P4E1	A0A024R5S2	112	127	CASC4	Protein CASC4	yes	no	3;4	0.00072395	101.53	0	0	0	9388700	0	0	0	175490000	0	46	1028	6550;6551	9555;9556;9557	9556	79		3	0	0	0	4576300	0	0	0	13715000	0
928	LQQDFSFLYSQLNHTENDVTHLQK	TMHRKFQETEQTIQKLQQDFSFLYSQLNHT	SQLNHTENDVTHLQKEMSNCRAGENAGMGR	K	L	Q	Q	K	E	24	0	2904.4	Q9BXX0	Q9BXX0	604	627	EMILIN2	EMILIN-2	yes	yes	4	8.8158e-27	151.33	0	0	0	51019000	0	0	0	114280000	0	657	1030	6553;6554	9559;9560;9561	9559	1222		3	0	0	0	24868000	0	0	0	8931000	0
929	LSALDNLLNHSSMFLK	GLFFRVEERKKWPERLSALDNLLNHSSMFL	SALDNLLNHSSMFLKGARLIPEMDQIFTEV	R	L	S	L	K	G	16	0	1801.94	B7Z766;B3KXH0;A0A384P5T6;Q9Y4L1;B7Z602;A0A087X054;B7Z2N4;Q68D25	B7Z766	671	686	HYOU1;DKFZp686N08236	Hypoxia up-regulated protein 1	yes	no	3	1.3565e-08	138.68	0	0	0	20045000	0	0	0	96189000	0	252	1031	6555;6556;6557	9562;9563;9564	9564	481		3	0	0	0	9770500	0	0	0	7517400	0
930	LSAVNSIFLSHNNTK	EEIYESSIRGVQLRRLSAVNSIFLSHNNTK	LSAVNSIFLSHNNTKELNSPILFAFSHLES	R	L	S	T	K	E	15	0	1643.86	B3KUI0;P48960;B4E336;B4DTS6	B3KUI0	314	328	CD97	CD97 antigen;CD97 antigen subunit alpha;CD97 antigen subunit beta	yes	no	2;3	1.8294e-60	183	0	0	0	13143000	9755400	12357000	0	0	0	356	1032	6558;6559;6560;6561;6562	9565;9566;9567;9568;9569	9569	646		4	0	0	0	6406100	11890000	10634000	0	0	0
931	LSCTLGFHTHAEELYYLNK	DNHVHSMLKYLDDVRLSCTLGFHTHAEELY	LGFHTHAEELYYLNKSVSIMLGTTDLLRER	R	L	S	N	K	S	19	0	2295.1	Q6AZY7	Q6AZY7	383	401	SCARA3	Scavenger receptor class A member 3	yes	yes	3	0.00032757	88.264	0	10612000	0	32615000	0	0	0	0	0	605	1033	6563;6564	9570;9571	9571	1134		1	0	8965400	0	15898000	0	0	0	0	0
935	LSDLSINSTECLHVHCR	DLGFQQGADTQRRFKLSDLSINSTECLHVH	DLSINSTECLHVHCRGLETSLAECTFTKRR	K	L	S	C	R	G	17	0	2039.95	Q6LAM1;Q8WW88;A0A087X0I2;G3XAM2;A0A0U4BCF5;A8K3L0;E7ETH0;B4DRF2;A0A2R8Y3M9;P05156	Q6LAM1	153	169	CFI	Complement factor I;Complement factor I heavy chain;Complement factor I light chain	yes	no	3	0.01367	56.215	0	0	0	0	0	0	0	0	0	139	1037	6578;6579	9586;9587	9587	270		2	0	0	0	0	0	0	0	0	0
936	LSDTTSQSNSTAK	LIKDVTEMMAQVEVKLSDTTSQSNSTAKEL	VKLSDTTSQSNSTAKELDSLQTEAESLDNT	K	L	S	A	K	E	13	0	1338.63	G3XAI2;P07942;Q8TAS6	G3XAI2	1295	1307	LAMB1	Laminin subunit beta-1	yes	no	2	1.9835e-40	229.82	0	0	0	216210000	142470000	102120000	146670000	981540000	231850000	485	1038	6580;6581;6582;6583;6584;6585	9588;9589;9590;9591;9592;9593;9594;9595	9590	858		8	0	0	0	105390000	173640000	87882000	18948000	76710000	25162000
937	LSHDANETLPLHLYVK	VTMQESGTFAFRTPKLSHDANETLPLHLYV	SHDANETLPLHLYVKSYGKNIDSKLHVTLY	K	L	S	V	K	S	16	0	1848.97	O15031	O15031	728	743	PLXNB2	Plexin-B2	yes	yes	3	0.0008915	85.493	0	0	0	18160000	0	0	0	0	0	504	1039	6586;6587	9596;9597	9596	887		2	0	0	0	8851600	0	0	0	0	0
938	LSHNELADSGIPGNSFNVSSLVELDLSYNK	PDEYFKRFNALQYLRLSHNELADSGIPGNS	FNVSSLVELDLSYNKLKNIPTVNENLENYY	R	L	S	N	K	L	30	0	3218.57	P51884;A0A384N669;Q53FV4	P51884	236	265	LUM	Lumican	yes	no	3;4	3.5482e-103	222.95	2367000000	3397300000	2199100000	2357500000	1028300000	2244100000	4654000000	4877600000	4197100000	248	1040;1041;1042	6588;6589;6590;6591;6592;6593;6594;6595;6596;6597;6598;6599;6600;6601;6602;6603;6604;6605;6606;6607;6608;6609;6610;6611;6612;6613;6614;6615;6616;6617;6618;6619;6620;6621;6622;6623;6624;6625;6626;6627;6628;6629;6630;6631;6632;6633;6634;6635;6636;6637;6638;6639;6640;6641;6642;6643;6644;6645;6646;6647;6648;6649;6650	9598;9599;9600;9601;9602;9603;9604;9605;9606;9607;9608;9609;9610;9611;9612;9613;9614;9615;9616;9617;9618;9619;9620;9621;9622;9623;9624;9625;9626;9627;9628;9629;9630;9631;9632;9633;9634;9635;9636;9637;9638;9639;9640;9641;9642;9643;9644;9645;9646;9647;9648;9649;9650;9651;9652;9653;9654;9655;9656;9657;9658;9659;9660;9661;9662;9663;9664;9665;9666;9667;9668;9669;9670;9671;9672;9673;9674;9675;9676;9677…	9710	464;465		163	2367000000	2870100000	2357800000	1149100000	1253300000	1931200000	601250000	381190000	455490000
939	LSHNSLTNNGLASNTFNSSSLLELDLSYNQLQK	PDSYFRGAPKLLYVRLSHNSLTNNGLASNT	SSLLELDLSYNQLQKIPPVNTNLENLYLQG	R	L	S	Q	K	I	33	0	3621.79	A0A3B3IRN5;B4E1J3;A0A024R971;Q06828;B3KS64	A0A3B3IRN5	186	218	FMOD	Fibromodulin	yes	no	3;4	0	346.64	3176600000	4360900000	6696000000	3724700000	3304100000	1578300000	1104200000	3913200000	2976200000	80	1043;1044;1045;1046;1047	6651;6652;6653;6654;6655;6656;6657;6658;6659;6660;6661;6662;6663;6664;6665;6666;6667;6668;6669;6670;6671;6672;6673;6674;6675;6676;6677;6678;6679;6680;6681;6682;6683;6684;6685;6686;6687;6688;6689;6690;6691;6692;6693;6694;6695;6696;6697;6698;6699;6700;6701;6702;6703;6704;6705;6706;6707;6708;6709;6710;6711;6712;6713;6714;6715;6716;6717;6718;6719;6720;6721;6722;6723	9766;9767;9768;9769;9770;9771;9772;9773;9774;9775;9776;9777;9778;9779;9780;9781;9782;9783;9784;9785;9786;9787;9788;9789;9790;9791;9792;9793;9794;9795;9796;9797;9798;9799;9800;9801;9802;9803;9804;9805;9806;9807;9808;9809;9810;9811;9812;9813;9814;9815;9816;9817;9818;9819;9820;9821;9822;9823;9824;9825;9826;9827;9828;9829;9830;9831;9832;9833;9834;9835;9836;9837;9838;9839;9840;9841;9842;9843;9844;9845…	9813	143;144;145;146;147;148		78	3176600000	3684100000	7179500000	1815500000	4027100000	1358300000	142650000	305820000	322990000
941	LSITNETFR	GSSYIIDYYGTRLTRLSITNETFRKTQLYP	GTRLTRLSITNETFRKTQLYP_________	R	L	S	F	R	K	9	0	1079.56	J3KPA2;Q9BX74	J3KPA2	255	263	TM2D1	TM2 domain-containing protein 1	yes	no	2	0.0067478	111.95	0	0	0	0	0	7421500	0	0	0	498	1049	6729	9861	9861	875		1	0	0	0	0	0	6386700	0	0	0
943	LSSIGNYYKPWFFK	VIMTGVMTDEAEPSKLSSIGNYYKPWFFKH	KLSSIGNYYKPWFFKHVENYLKTNREGLEY	K	L	S	F	K	H	14	0	1748.89	B7ZAV4	B7ZAV4	252	265			yes	yes	2	0.0036818	85.731	0	0	0	0	0	0	0	0	0	434	1051	6731	9863	9863	774		1	0	0	0	0	0	0	0	0	0
944	LSSLEYLDLSSNNLSR	NYLTDEGLDNETFWKLSSLEYLDLSSNNLS	SSLEYLDLSSNNLSRVPAGLPRSLVLLHLE	K	L	S	S	R	V	16	0	1809.91	B2RA94;Q7Z5L7	B2RA94	76	91	PODN	Podocan	yes	no	2	2.4641e-228	321.01	9376800	0	0	48040000	0	0	221970000	308860000	145220000	328	1052	6732;6733;6734;6735;6736;6737	9864;9865;9866;9867;9868;9869;9870	9868	601;602		7	9376800	0	0	23416000	0	0	28677000	24138000	15760000
945	LSWTFLNK	GVGKGGALELHGQKKLSWTFLNKTLHPGGM	ELHGQKKLSWTFLNKTLHPGGMAEGGYFFE	K	L	S	N	K	T	8	0	1007.54	Q8WUJ3	Q8WUJ3	159	166	CEMIP	Cell migration-inducing and hyaluronan-binding protein	yes	yes	2	0.00034993	129.4	13590000	17175000	0	3296800	0	0	0	34444000	24276000	642	1053	6738;6739;6740;6741;6742;6743	9871;9872;9873;9874;9875;9876;9877	9874	1203		7	13590000	14510000	0	1607000	0	0	0	2691900	2634600
947	LTDTICGVGNMSANASDQER	LNINQKRNDYLDVSKLTDTICGVGNMSANA	CGVGNMSANASDQERTPWHVTIKPKSQETC	K	L	T	E	R	T	20	0	2137.94	E7ETN3;B4E1Z4;P06681;A0A0G2JL69;Q53GZ8;A0A1U9X8X9;A0A1U9X8X3;A0A1U9X8W4;Q53HP3;Q5JP69;B4DV48;Q7Z685;E9PDZ0;B4DQI1;A0A0G2JIE7;H0Y3H6;Q95IG1;A0A0G2JK28;B3KTX9	E7ETN3	229	248	C2;DKFZp779M0311	Complement C2;Complement C2b fragment;Complement C2a fragment	yes	no	2	3.5199e-177	292.83	0	0	0	21977000	0	0	0	342160000	111250000	471	1055	6745;6746;6747	9879;9880;9881;9882	9881	838;839		4	0	0	0	10712000	0	0	0	26741000	12073000
948	LTDVETQVLNQTSR	IGTSLLSQTAEQTRKLTDVETQVLNQTSRL	KLTDVETQVLNQTSRLEIQLLENSLSTYKL	K	L	T	S	R	L	14	0	1602.82	B4E3G9;Q15389	B4E3G9	56	69	ANGPT1	Angiopoietin-1	yes	no	2	0.0037529	95.018	0	0	0	3620500	0	0	0	0	0	411	1056	6748	9883	9883	738		1	0	0	0	1764700	0	0	0	0	0
949	LTFYGNWSEK	KPILDCCACGTAKYRLTFYGNWSEKTHPKD	TAKYRLTFYGNWSEKTHPKDYPRRANHWSA	R	L	T	E	K	T	10	0	1243.59	Q9HCB6	Q9HCB6	209	218	SPON1	Spondin-1	yes	yes	2	0.00049276	122.33	0	0	0	0	0	0	0	132780000	0	660	1057	6749	9884	9884	1226		1	0	0	0	0	0	0	0	10377000	0
951	LTNNSNQFQTEVGK	EKECQPPFAFRHVLKLTNNSNQFQTEVGKQ	KLTNNSNQFQTEVGKQLISGNLDAPEGGLD	K	L	T	G	K	Q	14	0	1578.76	Q8WWJ8;Q59H50;D3DSM0;J3KNI6;B4E0R1;P05107;A0A024DBF0;A0A024DAS2;A0A024DAE5	Q8WWJ8	153	166	ITGB2	Integrin beta;Integrin beta-2	yes	no	2	4.9161e-148	295.34	0	0	0	59445000	0	36293000	0	0	0	460	1059	6751;6752	9886;9887;9888	9887	814		3	0	0	0	28975000	0	31233000	0	0	0
952	LTQGICLEQNK	DIKAEIKCSGIREVKLTQGICLEQNKTSSC	REVKLTQGICLEQNKTSSCAEFKKDRGEGL	K	L	T	N	K	T	11	0	1302.66	Q9UH97;B4DG27;Q8IUM0;Q3C1E7;B4DUX4;A8KAG5;P28906	Q9UH97	19	29	CD34	Hematopoietic progenitor cell antigen CD34	yes	no	2	4.6987e-09	140.45	0	0	0	0	0	0	0	0	0	311	1060	6753;6754	9889;9890	9890	579		2	0	0	0	0	0	0	0	0	0
953	LTSCATNASICGDEAR	CGDGSDEEDCSIDPKLTSCATNASICGDEA	TSCATNASICGDEARCVRTEKAAYCACRSG	K	L	T	A	R	C	16	0	1724.75	Q07954;Q59FG2;Q6LBN5	Q07954	3782	3797	LRP1	Prolow-density lipoprotein receptor-related protein 1;Low-density lipoprotein receptor-related protein 1 85 kDa subunit;Low-density lipoprotein receptor-related protein 1 515 kDa subunit;Low-density lipoprotein receptor-related protein 1 intracellular domain	yes	no	2	1.6878e-284	343.87	0	0	0	116790000	24276000	30076000	984610000	1967900000	914410000	575	1061	6755;6756;6757;6758;6759;6760;6761	9891;9892;9893;9894;9895;9896;9897	9891	1072		7	0	0	0	56925000	29588000	25882000	127200000	153800000	99238000
957	LVGPSSVVCLPNGTWTGEQPHCR	LVDHEVHFTCNPGFRLVGPSSVVCLPNGTW	CLPNGTWTGEQPHCRGISECSSQPCQNGGT	R	L	V	C	R	G	23	0	2550.21	B8ZZC1;Q53RD9	B8ZZC1	113	135	FBLN7	Fibulin-7	yes	no	3	4.2161e-77	230.71	132390000	148700000	132730000	145730000	27054000	55708000	1304400000	1686000000	859710000	440	1065	6775;6776;6777;6778;6779;6780;6781;6782;6783	9913;9914;9915;9916;9917;9918;9919;9920;9921;9922;9923;9924;9925;9926;9927;9928	9917	780		16	132390000	125630000	142310000	71035000	32974000	47941000	168520000	131760000	93301000
960	LVNGSGPHEGR	RAGDASGVEAPMMIRLVNGSGPHEGRVEVY	MMIRLVNGSGPHEGRVEVYHDRRWGTVCDD	R	L	V	G	R	V	11	0	1121.56	Q6ZMJ2;B4DVB2	Q6ZMJ2	395	405	SCARA5	Scavenger receptor class A member 5	yes	no	3	0.016563	67.385	0	0	0	0	0	0	0	0	0	620	1068	6787	9932	9932	1165		1	0	0	0	0	0	0	0	0	0
964	LVQLFPNDTSLK	QFLGHMRGSLLTLQRLVQLFPNDTSLKNDL	LQRLVQLFPNDTSLKNDLGVGYLLIGDNDN	R	L	V	L	K	N	12	0	1373.76	Q12797	Q12797	446	457	ASPH	Aspartyl/asparaginyl beta-hydroxylase	yes	yes	2	2.5865e-14	170.72	19732000	19196000	18241000	164280000	0	0	558170000	984270000	372270000	577	1072	6793;6794;6795;6796;6797;6798;6799;6800;6801;6802	9941;9942;9943;9944;9945;9946;9947;9948;9949;9950;9951;9952;9953;9954;9955;9956;9957	9951	1085		17	19732000	16217000	19558000	80073000	0	0	72110000	76923000	40401000
965	LVSGNLTDR	PDGCGVCGGDDSTCRLVSGNLTDRGGPLGY	DDSTCRLVSGNLTDRGGPLGYQKILWIPAG	R	L	V	D	R	G	9	0	973.519	B7ZMJ3;Q6UY14	B7ZMJ3	509	517	ADAMTSL4	ADAMTS-like protein 4	yes	no	2	0.0020208	123.98	11302000	22386000	20520000	23126000	0	0	235230000	237090000	0	437	1073	6803;6804;6805;6806;6807;6808;6809	9958;9959;9960;9961;9962;9963;9964	9963	779		7	11302000	18912000	22001000	11272000	0	0	30389000	18529000	0
966	LYANHTSLPASAR	ENEEFYRKFAVPMLRLYANHTSLPASAREA	LRLYANHTSLPASAREAFRAGLKVSFANFI	R	L	Y	A	R	E	13	0	1399.72	Q53FU0;Q53FS1;A0A024R860;Q9NRB3	Q53FU0	277	289	CHST12	Carbohydrate sulfotransferase 12	yes	no	3	2.0357e-23	151.99	40066000	69194000	60717000	11941000	14307000	14055000	0	463150000	0	66	1074	6810;6811;6812;6813;6814;6815;6816;6817;6818;6819;6820	9965;9966;9967;9968;9969;9970;9971;9972;9973;9974;9975;9976;9977	9976	112		13	40066000	58456000	65101000	5820200	17437000	12095000	0	36196000	0
967	LYLDHNNLTR	KVGRKVFSKLRHLERLYLDHNNLTRMPGPL	RHLERLYLDHNNLTRMPGPLPRSLRELHLD	R	L	Y	T	R	M	10	0	1257.65	A0A3B3IRN5;B4E1J3;A0A024R971;Q06828;B3KS64;B3KYB3	A0A3B3IRN5	71	80	FMOD	Fibromodulin	yes	no	1;2;3	7.7215e-185	285.74	104570000000	137580000000	118340000000	94333000000	96044000000	109480000000	224010000000	213990000000	200280000000	80	1075;1076	6821;6822;6823;6824;6825;6826;6827;6828;6829;6830;6831;6832;6833;6834;6835;6836;6837;6838;6839;6840;6841;6842;6843;6844;6845;6846;6847;6848;6849;6850;6851;6852;6853;6854;6855;6856;6857;6858;6859;6860;6861;6862;6863;6864;6865;6866;6867;6868;6869;6870;6871;6872;6873;6874;6875;6876;6877;6878;6879;6880;6881;6882;6883;6884;6885;6886;6887;6888;6889;6890;6891;6892;6893;6894;6895;6896;6897;6898;6899;6900…	9978;9979;9980;9981;9982;9983;9984;9985;9986;9987;9988;9989;9990;9991;9992;9993;9994;9995;9996;9997;9998;9999;10000;10001;10002;10003;10004;10005;10006;10007;10008;10009;10010;10011;10012;10013;10014;10015;10016;10017;10018;10019;10020;10021;10022;10023;10024;10025;10026;10027;10028;10029;10030;10031;10032;10033;10034;10035;10036;10037;10038;10039;10040;10041;10042;10043;10044;10045;10046;10047;1…	10181	149;150		274	104570000000	116230000000	126880000000	45981000000	117060000000	94217000000	28940000000	16723000000	21736000000
968	LYLGSNNLTALHPALFQNLSK	HLPAGIFRDLEELVKLYLGSNNLTALHPAL	NLTALHPALFQNLSKLELLSLSKNQLTTLP	K	L	Y	S	K	L	21	0	2313.25	P22792	P22792	342	362	CPN2	Carboxypeptidase N subunit 2	yes	yes	3	0.0012871	99.407	0	0	0	22394000	0	0	0	0	0	550	1077	7043	10274	10274	991;992		1	0	0	0	10916000	0	0	0	0	0
970	LYPNASQHITPSYNYAPNMDK	AAPHGPEDSAPQFSKLYPNASQHITPSYNY	QHITPSYNYAPNMDKHWIMQYTGPMLPIHM	K	L	Y	D	K	H	21	0	2423.12	Q7Z2W2;A0A024R809;Q8IWU6;A0A087WWR8	Q7Z2W2	237	257	DKFZp686F13142;SULF1	Extracellular sulfatase Sulf-1	yes	no	3	0.0046675	68.88	0	0	0	0	0	0	0	148340000	0	63	1079	7049	10281	10281	105		1	0	0	0	0	0	0	0	11593000	0
971	LYWISSGNHTINR	QKGPVGLAIDFPESKLYWISSGNHTINRCN	SKLYWISSGNHTINRCNLDGSGLEVIDAMR	K	L	Y	N	R	C	13	0	1559.78	Q07954	Q07954	1756	1768	LRP1	Prolow-density lipoprotein receptor-related protein 1;Low-density lipoprotein receptor-related protein 1 85 kDa subunit;Low-density lipoprotein receptor-related protein 1 515 kDa subunit;Low-density lipoprotein receptor-related protein 1 intracellular domain	yes	yes	2;3	1.2395e-93	270.1	0	11155000	17834000	188130000	15954000	19107000	397260000	1203400000	672990000	575	1080	7050;7051;7052;7053;7054;7055;7056;7057;7058;7059;7060;7061	10282;10283;10284;10285;10286;10287;10288;10289;10290;10291;10292;10293;10294;10295	10292	1073		13	0	9424300	19122000	91702000	19445000	16443000	51323000	94044000	73038000
972	LYWTDGDNISMANMDGSNR	LEQPHGLVVHPLRGKLYWTDGDNISMANMD	DGDNISMANMDGSNRTLLFSGQKGPVGLAI	K	L	Y	N	R	T	19	0	2158.9	Q07954	Q07954	1716	1734	LRP1	Prolow-density lipoprotein receptor-related protein 1;Low-density lipoprotein receptor-related protein 1 85 kDa subunit;Low-density lipoprotein receptor-related protein 1 515 kDa subunit;Low-density lipoprotein receptor-related protein 1 intracellular domain	yes	yes	2	1.6153e-48	166.38	0	0	0	0	0	0	0	0	0	575	1081	7062	10296	10296	1074;1075		1	0	0	0	0	0	0	0	0	0
973	MAGANPYLGEEAEGLAAER	SVLPCWPNRAAAAARMAGANPYLGEEAEGL	NPYLGEEAEGLAAERSPLPPGAAEDAKPKD	R	M	A	E	R	S	19	0	1947.9	B7Z4C9;B7Z5X5;Q16650	B7Z4C9	172	190	TBR1	T-box brain protein 1	yes	no	2	0.0031167	71.085	0	0	0	0	0	0	0	0	0	421	1082	7063	10297	10297	753		1	0	0	0	0	0	0	0	0	0
974	MAGLNVSLSFFFATFALCEAAR	______________________________	LSFFFATFALCEAARRASKALLPVGAYEVF	-	M	A	A	R	R	22	0	2422.18	B2RXL4;C9J6F6;Q8IXF9	B2RXL4	1	22	AQP12B;AQP12A	Aquaporin-12A	yes	no	2	0.017243	54.276	0	0	0	0	0	0	0	0	0	337	1083	7064	10298	10298	618		1	0	0	0	0	0	0	0	0	0
975	MAIWAATDHNVDNTTEIFR	HFLGCLERLDYPKSRMAIWAATDHNVDNTT	AATDHNVDNTTEIFRERLKNVQRLYHYVEW	R	M	A	F	R	E	19	0	2204.03	B4DF84;A0A3B3IT37;Q8IYK4	B4DF84	85	103	COLGALT2	Procollagen galactosyltransferase 2	yes	no	2;3	0	357.91	0	9103000	0	13400000	0	0	0	112580000	41043000	260	1084	7065;7066;7067;7068;7069	10299;10300;10301;10302;10303	10302	498		5	0	7690300	0	6531800	0	0	0	8798600	4454300
977	MDGASNVTCINSR	KAGEQVTYTCATYYKMDGASNVTCINSRWT	YKMDGASNVTCINSRWTGRPTCRDTSCVNP	K	M	D	S	R	W	13	0	1423.62	A0A024R962;P08603;Q14006;A0A024R984;A8K5T0	A0A024R962	1024	1036	hCG_40889;CFH;HF	Complement factor H	yes	no	2	1.6216e-109	275.84	0	0	0	289410000	0	8360100	541160000	1320000000	454780000	79	1086;1087	7077;7078;7079;7080;7081;7082;7083	10313;10314;10315;10316;10317;10318;10319;10320	10320	135	9	8	0	0	0	141070000	0	7194400	69913000	103160000	49355000
978	MDPPCTNTTAASTYLNNPYVR	RMWHQALLRSGDKVRMDPPCTNTTAASTYL	NTTAASTYLNNPYVRKALNIPEQLPQWDMC	R	M	D	V	R	K	21	0	2385.07	X6R5C5;Q59EV6;X6R8A1;P10619	X6R5C5	328	348	CTSA;PPGB	Carboxypeptidase;Lysosomal protective protein;Lysosomal protective protein 32 kDa chain;Lysosomal protective protein 20 kDa chain	yes	no	2	7.3575e-15	138.5	0	0	0	5976200	0	0	0	0	0	540	1088	7084	10321	10321	971		1	0	0	0	2913000	0	0	0	0	0
979	MEAQNTTEVYVK	______________________________	______________________________	-	M	E	V	K	W	12	0	1411.67	A0A2R8Y484	A0A2R8Y484	1	12			yes	yes	2	0.0055747	106.4	0	0	0	0	0	0	0	0	0	234	1089	7085	10322	10322	429		1	0	0	0	0	0	0	0	0	0
981	MEMPSTPQQLQNLTEDIR	ADLDSIEAVANEVLKMEMPSTPQQLQNLTE	PSTPQQLQNLTEDIRERVESLSQVEVILQH	K	M	E	I	R	E	18	0	2130.01	G3XAI2;P07942;Q8TAS6	G3XAI2	1555	1572	LAMB1	Laminin subunit beta-1	yes	no	2	2.0878e-55	228.8	0	0	0	18537000	0	0	0	0	0	485	1091	7089	10327	10327	859		1	0	0	0	9035300	0	0	0	0	0
982	MFSQNDTR	NLSDLYRWLQAQKDKMFSQNDTRCAGPEAV	LQAQKDKMFSQNDTRCAGPEAVKGQTLLAV	K	M	F	T	R	C	8	0	997.429	B4E1I8;Q68CK4;P02750	B4E1I8	304	311	HMFT1766;LRG1	Leucine-rich alpha-2-glycoprotein	yes	no	2	0.0033509	150.84	0	21698000	11790000	20225000	0	0	0	395430000	14875000	405	1092;1093	7090;7091;7092;7093;7094;7095	10328;10329;10330;10331;10332;10333;10334	10331	730	76	7	0	18330000	12641000	9858100	0	0	0	30904000	1614300
985	MHIFQNGSLVIHDVAPEDSGR	KGKDRILDPTKLGPRMHIFQNGSLVIHDVA	GSLVIHDVAPEDSGRYTCIAGNSCNIKHTE	R	M	H	G	R	Y	21	0	2321.12	Q59FV9;Q13308	Q59FV9	681	701	PTK7	Inactive tyrosine-protein kinase 7	yes	no	3	0.0012501	69.548	0	0	0	0	0	0	0	0	0	578	1096	7098;7099	10337;10338	10338	1087		2	0	0	0	0	0	0	0	0	0
986	MHLNGSNVQVLHR	IYWTDVTTQGSMIRRMHLNGSNVQVLHRTG	RRMHLNGSNVQVLHRTGLSNPDGLAVDWVG	R	M	H	H	R	T	13	0	1503.77	Q07954;Q59FG2	Q07954	3086	3098	LRP1	Prolow-density lipoprotein receptor-related protein 1;Low-density lipoprotein receptor-related protein 1 85 kDa subunit;Low-density lipoprotein receptor-related protein 1 515 kDa subunit;Low-density lipoprotein receptor-related protein 1 intracellular domain	yes	no	3	1.9872e-78	257.19	86839000	56766000	16106000	190650000	114400000	154720000	824530000	1440900000	902240000	575	1097;1098	7100;7101;7102;7103;7104;7105;7106;7107;7108;7109;7110;7111;7112;7113;7114;7115;7116	10339;10340;10341;10342;10343;10344;10345;10346;10347;10348;10349;10350;10351;10352;10353;10354;10355;10356;10357;10358;10359;10360;10361;10362;10363;10364;10365	10364	1076	109	26	86839000	47957000	17269000	92926000	139440000	133150000	106520000	112610000	97917000
987	MIENGSLSFLPTLR	YSKLYRLGLGHNQIRMIENGSLSFLPTLRE	RMIENGSLSFLPTLRELHLDNNKLARVPSG	R	M	I	L	R	E	14	0	1576.83	A6NLG9;B4DDQ2;Q53FI4;A8K7E0;P21810;B3KS75;Q53HU6;Q8NAB7;B4DNL4;B4DQD6;B4DDN7	A6NLG9	206	219	BGN	Biglycan	yes	no	1;2;3	1.5059e-199	290.66	176410000000	138000000000	127790000000	119370000000	139520000000	117470000000	429620000000	421560000000	343130000000	288	1099;1100;1101	7117;7118;7119;7120;7121;7122;7123;7124;7125;7126;7127;7128;7129;7130;7131;7132;7133;7134;7135;7136;7137;7138;7139;7140;7141;7142;7143;7144;7145;7146;7147;7148;7149;7150;7151;7152;7153;7154;7155;7156;7157;7158;7159;7160;7161;7162;7163;7164;7165;7166;7167;7168;7169;7170;7171;7172;7173;7174;7175;7176;7177;7178;7179;7180;7181;7182;7183;7184;7185;7186;7187;7188;7189;7190;7191;7192;7193;7194;7195;7196…	10366;10367;10368;10369;10370;10371;10372;10373;10374;10375;10376;10377;10378;10379;10380;10381;10382;10383;10384;10385;10386;10387;10388;10389;10390;10391;10392;10393;10394;10395;10396;10397;10398;10399;10400;10401;10402;10403;10404;10405;10406;10407;10408;10409;10410;10411;10412;10413;10414;10415;10416;10417;10418;10419;10420;10421;10422;10423;10424;10425;10426;10427;10428;10429;10430;10431;104…	10602	541	61	433	176410000000	116580000000	137020000000	58184000000	170040000000	101090000000	55503000000	32946000000	37239000000
989	MLANLQNISLQNNR	LHTNALQDLDGNVFRMLANLQNISLQNNRL	RMLANLQNISLQNNRLRQLPGNIFANVNGL	R	M	L	N	R	L	14	0	1627.85	B3KWI4;Q8TF66	B3KWI4	363	376	LRRC15	Leucine-rich repeat-containing protein 15	yes	no	2	7.125e-192	309.94	0	0	0	0	15483000	25809000	85579000	268820000	109110000	358	1103	7316;7317;7318;7319;7320	10813;10814;10815;10816;10817;10818;10819;10820;10821	10819	649		9	0	0	0	0	18871000	22210000	11056000	21009000	11841000
990	MLEAYNLTEK	CPLIYLDGYTSPGFKMLEAYNLTEKNFASV	SPGFKMLEAYNLTEKNFASVQGVSLESGSF	K	M	L	E	K	N	10	0	1210.59	A0A087X0A8;B9EJB8;D6RGG3;Q99715;H0Y5N9;H0Y991	A0A087X0A8	1334	1343	COL12A1	Collagen alpha-1(XII) chain	yes	no	1;2	1.5029e-06	195.58	209420000	180800000	168180000	7175200000	230150000	2411700000	5574000000	16335000000	3683200000	138	1104;1105	7321;7322;7323;7324;7325;7326;7327;7328;7329;7330;7331;7332;7333;7334;7335;7336;7337;7338;7339;7340;7341;7342;7343;7344;7345;7346	10822;10823;10824;10825;10826;10827;10828;10829;10830;10831;10832;10833;10834;10835;10836;10837;10838;10839;10840;10841;10842;10843;10844;10845;10846;10847;10848;10849;10850;10851;10852;10853;10854;10855;10856;10857;10858;10859;10860;10861;10862;10863;10864;10865;10866;10867;10868;10869;10870;10871;10872;10873;10874;10875;10876	10833	267	26	54	209420000	152740000	180320000	3497400000	280510000	2075500000	720110000	1276600000	399720000
992	MLNTSSLLEQLNEQFNWVSR	LTRKYNELLKSYQWKMLNTSSLLEQLNEQF	SLLEQLNEQFNWVSRLANLTQGEDQYYLRV	K	M	L	S	R	L	20	0	2408.18	A0A384NKS6;P10909;B4DW11;H0YC35;H0YAS8;Q8IWM0	A0A384NKS6	404	423	CLU	Clusterin;Clusterin beta chain;Clusterin alpha chain;Clusterin	yes	no	2;3	0	423.1	6781700000	11830000000	10422000000	548610000	325760000	291320000	28979000000	15601000000	20844000000	250	1107;1108;1109;1110;1111	7350;7351;7352;7353;7354;7355;7356;7357;7358;7359;7360;7361;7362;7363;7364;7365;7366;7367;7368;7369;7370;7371;7372;7373;7374;7375;7376;7377;7378;7379;7380;7381;7382;7383;7384;7385;7386;7387;7388;7389;7390;7391;7392;7393;7394;7395;7396;7397;7398;7399;7400;7401;7402;7403;7404;7405;7406;7407;7408;7409;7410;7411;7412;7413;7414;7415;7416;7417;7418;7419;7420;7421;7422;7423;7424;7425;7426;7427;7428;7429…	10882;10883;10884;10885;10886;10887;10888;10889;10890;10891;10892;10893;10894;10895;10896;10897;10898;10899;10900;10901;10902;10903;10904;10905;10906;10907;10908;10909;10910;10911;10912;10913;10914;10915;10916;10917;10918;10919;10920;10921;10922;10923;10924;10925;10926;10927;10928;10929;10930;10931;10932;10933;10934;10935;10936;10937;10938;10939;10940;10941;10942;10943;10944;10945;10946;10947;109…	10885	474;475;476	57	156	6781700000	9993800000	11174000000	267410000	397040000	250700000	3743800000	1219300000	2262200000
994	MNASFSLK	PESHGIIDNKMYDPKMNASFSLKSKEKFNP	NKMYDPKMNASFSLKSKEKFNPEWYKGEPI	K	M	N	L	K	S	8	0	896.443	E9PE72;B2RBY8;P22413	E9PE72	284	291	ENPP1	Ectonucleotide pyrophosphatase/phosphodiesterase family member 1;Alkaline phosphodiesterase I;Nucleotide pyrophosphatase	yes	no	2	0.023178	89.752	0	0	0	38185000	16654000	15326000	0	0	0	332	1113	7458;7459;7460;7461	11052;11053;11054;11055	11053	611		4	0	0	0	18612000	20298000	13189000	0	0	0
995	MNAYLTK	______________________________	______________________________	-	M	N	T	K	Q	7	0	839.421	Q6ZSU2	Q6ZSU2	1	7	DLG2		yes	yes	2	0.024846	81.381	0	0	0	0	0	0	0	0	0	621	1114	7462;7463;7464	11056;11057;11058	11056	1167		3	0	0	0	0	0	0	0	0	0
997	MNFTGGDTCHK	GLLTQKLTYENGLLKMNFTGGDTCHKVYQR	GLLKMNFTGGDTCHKVYQRSTAIFFYCDRG	K	M	N	H	K	V	11	0	1266.51	Q59EZ3;P11717	Q59EZ3	1234	1244	IGF2R	Cation-independent mannose-6-phosphate receptor	yes	no	2;3	0.0013506	114.4	0	0	0	18856000	0	0	0	0	0	541	1116	7466;7467;7468	11060;11061;11062	11060	973		3	0	0	0	9190800	0	0	0	0	0
998	MNLTVMCPSIDPLHYHHLTYIR	RNLEHLYLQNNEIEKMNLTVMCPSIDPLHY	PSIDPLHYHHLTYIRVDQNKLKEPISSYIF	K	M	N	I	R	V	22	0	2710.32	B2R7N9;Q99983	B2R7N9	315	336	OMD	Osteomodulin	yes	no	3;4	1.2835e-39	176.84	80077000	135200000	75908000	0	172160000	233340000	0	0	145250000	324	1117;1118	7469;7470;7471;7472;7473;7474;7475;7476;7477;7478	11063;11064;11065;11066;11067;11068;11069;11070;11071;11072;11073;11074;11075;11076;11077;11078;11079	11074	597	66	16	80077000	114220000	81389000	0	209830000	200810000	0	0	15763000
999	MNLTYR	VGEYNVFPRTLKWSKMNLTYRIVNYTPDMT	FPRTLKWSKMNLTYRIVNYTPDMTHSEVEK	K	M	N	Y	R	I	6	0	796.39	Q7Z5M0;Q53H33;Q7Z5M1;G5E971;P45452;Q6LBE5	Q7Z5M0	116	121	MMP13	Collagenase 3	yes	no	2	0.002354	126.04	0	0	0	0	0	0	0	0	0	487	1119	7479	11080	11080	863		1	0	0	0	0	0	0	0	0	0
1002	MSQAVQTNGTQPLSK	______________________________	MSQAVQTNGTQPLSKTWELSLYELQRTPQE	-	M	S	S	K	T	15	0	1588.79	X6RFN3;Q99496	X6RFN3	1	15	RNF2	E3 ubiquitin-protein ligase RING2	yes	no	2	0.01593	68.893	0	0	0	0	0	0	251430000	590800000	252050000	654	1123	7489;7490;7491	11092;11093;11094	11092	1220		3	0	0	0	0	0	0	32482000	46172000	27354000
1003	MSVINFECNK	LIYFGGDECSSGFQRMSVINFECNKTAGND	SGFQRMSVINFECNKTAGNDGKGTPVFTGE	R	M	S	N	K	T	10	0	1240.56	Q59EZ3;P11717	Q59EZ3	350	359	IGF2R	Cation-independent mannose-6-phosphate receptor	yes	no	2	0.0010503	138.1	0	0	0	0	0	0	0	51426000	0	541	1124	7492	11095	11095	974		1	0	0	0	0	0	0	0	4019100	0
1004	MVSHHNLTTGATLINEQWLLTTAK	______________________________	GATLINEQWLLTTAKNLFLNHSENATAKDI	-	M	V	A	K	N	24	0	2678.39	Q6PEJ8;B3KP77;Q6NSB4;A0A087WU08;A0A0C4DGL8;J3QR68;H0Y300;P00738;A0A0A0MRD9;P00739	Q6PEJ8	1	24	HP;HPR	Haptoglobin;Haptoglobin alpha chain;Haptoglobin beta chain;Haptoglobin-related protein	yes	no	3;4	4.2104e-133	266.94	49104000	45223000	20191000	127640000	0	221660000	140630000	3948000000	999710000	344	1125;1126	7493;7494;7495;7496;7497;7498;7499;7500;7501;7502;7503;7504;7505;7506	11096;11097;11098;11099;11100;11101;11102;11103;11104;11105;11106;11107;11108;11109;11110;11111;11112;11113;11114;11115;11116;11117;11118;11119;11120;11121	11119	627	68	25	49104000	38205000	21649000	62216000	0	190750000	18168000	308550000	108500000
1007	MYNGSVPFEER	GSDVEINGIFPDIYKMYNGSVPFEERILAV	DIYKMYNGSVPFEERILAVLQWLQLPKDER	K	M	Y	E	R	I	11	0	1327.59	E9PE72;B2RBY8;P22413	E9PE72	339	349	ENPP1	Ectonucleotide pyrophosphatase/phosphodiesterase family member 1;Alkaline phosphodiesterase I;Nucleotide pyrophosphatase	yes	no	2	4.1813e-08	190.96	18696000	17575000	15211000	137080000	29404000	43805000	556390000	828810000	401530000	332	1129;1130	7512;7513;7514;7515;7516;7517;7518;7519;7520;7521	11129;11130;11131;11132;11133;11134;11135;11136;11137;11138;11139;11140;11141	11137	612	67	13	18696000	14848000	16309000	66818000	35837000	37698000	71881000	64773000	43577000
1008	MYNHSWPESLACDELPVYDR	SVCQRARDDCEPLMKMYNHSWPESLACDEL	WPESLACDELPVYDRGVCISPEAIVTDLPE	K	M	Y	D	R	G	20	0	2481.07	B4E1T4;Q6FHJ7	B4E1T4	111	130	SFRP4	Secreted frizzled-related protein 4	yes	no	3	4.313e-31	182.39	14118000	15893000	10252000	10304000	0	0	52257000	102630000	173750000	406	1131	7522;7523;7524;7525;7526;7527;7528;7529;7530	11142;11143;11144;11145;11146;11147;11148;11149;11150;11151;11152;11153;11154;11155	11153	732		14	14118000	13427000	10992000	5022300	0	0	6751100	8020800	18857000
1009	MYSEGSDIVPQSNETALHYFK	AANAGNSHAMAFLGKMYSEGSDIVPQSNET	DIVPQSNETALHYFKKAADMGNPVGQSGLG	K	M	Y	F	K	K	21	0	2415.11	Q9UBV2	Q9UBV2	419	439	SEL1L	Protein sel-1 homolog 1	yes	yes	3	1.5322e-05	112.55	0	0	0	24612000	0	0	108470000	235800000	153620000	666	1132	7531;7532;7533;7534	11156;11157;11158;11159;11160	11158	1247		5	0	0	0	11997000	0	0	14013000	18428000	16672000
1011	NACCSTNTSQEAHK	GPEDKLHEQCRPWRKNACCSTNTSQEAHKD	KNACCSTNTSQEAHKDVSYLYRFNWNHCGE	K	N	A	H	K	D	14	0	1606.65	A0A172Q3A8;A0A024R5H1;P15328;Q9NP04	A0A172Q3A8	38	51	FOLR1	Folate receptor alpha	yes	no	3	0.0016496	95.981	0	0	0	0	0	17000000	0	0	0	44	1134	7537	11163	11163	75		1	0	0	0	0	0	14630000	0	0	0
1012	NAHGEEKENLTAR	LWAYLTIEQLLEKRKNAHGEEKENLTARAL	RKNAHGEEKENLTARALDLSLKYHFVTPLT	K	N	A	A	R	A	13	1	1467.71	A0A087WW43;Q06033	A0A087WW43	572	584	ITIH3	Inter-alpha-trypsin inhibitor heavy chain H3	yes	no	2;3	8.0403e-09	154.65	0	0	0	37650000	0	0	0	63032000	0	131	1135	7538;7539;7540	11164;11165;11166;11167	11167	253		4	0	0	0	18352000	0	0	0	4926100	0
1013	NAIQAFGNGTDVNVSPK	CEKFLRDFTENPCLRNAIQAFGNGTDVNVS	IQAFGNGTDVNVSPKGPSFQATQAPRVEKT	R	N	A	P	K	G	17	0	1730.86	B4DS89;O00451	B4DS89	217	233	GFRA2	GDNF family receptor alpha-2	yes	no	2	0.00031162	83.53	0	0	0	0	0	0	0	0	0	390	1136	7541	11168	11168	703		1	0	0	0	0	0	0	0	0	0
1014	NALNLTFHAQNVGEGGAYEAELR	LEVFGEQNHVYLGDKNALNLTFHAQNVGEG	AQNVGEGGAYEAELRVTAPPEAEYSGLVRH	K	N	A	L	R	V	23	0	2473.2	B2R627;A8K6A5;A0A024RB01;P08648	B2R627	672	694	ITGA5	Integrin alpha-5;Integrin alpha-5 heavy chain;Integrin alpha-5 light chain	yes	no	3	3.271e-41	179.47	0	0	0	21063000	0	21044000	0	0	0	95	1137	7542;7543	11169;11170;11171	11169	203		3	0	0	0	10267000	0	18110000	0	0	0
1015	NALNVSQAWR	SGPGARREAFKTSSRNALNVSQAWRHALPF	KTSSRNALNVSQAWRHALPFAKIRRVQELC	R	N	A	W	R	H	10	0	1157.59	A0A1I9LHJ2;A0A1I9LHJ1;A0A1I9LHJ0;Q9GZX3	A0A1I9LHJ2	325	334	CHST6	Carbohydrate sulfotransferase 6	yes	no	2	9.7407e-79	265.06	0	10195000	8248500	9167500	0	0	281870000	211440000	301970000	213	1138	7544;7545;7546;7547;7548;7549;7550	11172;11173;11174;11175;11176;11177;11178;11179;11180	11180	396		9	0	8612600	8844100	4468500	0	0	36415000	16524000	32771000
1016	NASEIEVPFVTR	KNKDIVTVANAVFVKNASEIEVPFVTRNKD	FVKNASEIEVPFVTRNKDVFQCEVRNVNFE	K	N	A	T	R	N	12	0	1360.7	C9JN98;B4DMR3;A0A024R498;A0A024R451;P07093	C9JN98	118	129	SERPINE2	Glia-derived nexin	yes	no	2	1.6863e-18	208.56	110330000	91274000	56451000	0	0	0	0	267810000	273950000	34	1139	7551;7552;7553;7554;7555;7556	11181;11182;11183;11184;11185;11186;11187	11187	46		7	110330000	77109000	60527000	0	0	0	0	20930000	29730000
1017	NASNMEYR	SYWTKNGVELSATRKNASNMEYRINKPRAE	ELSATRKNASNMEYRINKPRAEDSGEYHCV	K	N	A	Y	R	I	8	0	983.413	Q9UFM8;Q9Y639;Q9Y499	Q9UFM8	160	167	DKFZp566H1924;NPTN	Neuroplastin	yes	no	2	1.5235e-11	161.02	0	0	0	0	0	0	48310000	117950000	0	667	1140	7557;7558;7559;7560	11188;11189;11190;11191	11191	1251		4	0	0	0	0	0	0	6241200	9218100	0
1019	NATLVNEADK	QGGEEEWDFAWEQFRNATLVNEADKLRAAL	WEQFRNATLVNEADKLRAALACSKELWILN	R	N	A	D	K	L	10	0	1073.54	A0A024RC61;Q59E93;P15144;B4DP96;B4DPH5;B4DP01;B4DV63	A0A024RC61	818	827	ANPEP	Aminopeptidase N	yes	no	2	1.6201e-29	193.38	0	0	0	120870000	0	0	0	0	0	99	1142	7562;7563;7564	11193;11194;11195	11195	220		3	0	0	0	58917000	0	0	0	0	0
1020	NATYGHYAPGEEFHDVEDAETYK	YDTDRDGRVGWEELRNATYGHYAPGEEFHD	PGEEFHDVEDAETYKKMLARDERRFRVADQ	R	N	A	Y	K	K	23	0	2642.12	M0QZH0;Q96D15	M0QZH0	89	111	RCN3	Reticulocalbin-3	yes	no	3;4	7.369e-133	266.46	0	0	6895400	123660000	0	0	378250000	1221900000	812580000	501	1143	7565;7566;7567;7568;7569;7570;7571;7572	11196;11197;11198;11199;11200;11201;11202;11203;11204;11205;11206;11207	11202	878		11	0	0	7393300	60275000	0	0	48867000	95497000	88186000
1021	NATYGHYAPGEEFHDVEDAETYKK	YDTDRDGRVGWEELRNATYGHYAPGEEFHD	GEEFHDVEDAETYKKMLARDERRFRVADQD	R	N	A	K	K	M	24	1	2770.21	M0QZH0;Q96D15	M0QZH0	89	112	RCN3	Reticulocalbin-3	yes	no	4	1.703e-39	166.91	0	0	0	0	0	0	0	827100000	685280000	501	1144	7573;7574	11208;11209;11210;11211;11212;11213;11214;11215	11213	878		8	0	0	0	0	0	0	0	64640000	74371000
1022	NATYGYVLDDPDPDDGFNYK	HDLNEDGLVSWEEYKNATYGYVLDDPDPDD	YVLDDPDPDDGFNYKQMMVRDERRFKMADK	K	N	A	Y	K	Q	20	0	2277.97	Q6IAW5;B3KQF5;O43852	Q6IAW5	131	150	CALU	Calumenin	yes	no	2;3	7.3302e-201	303.7	0	0	0	0	0	0	131820000	364320000	176880000	347	1145	7575;7576;7577;7578	11216;11217;11218;11219;11220	11220	634		5	0	0	0	0	0	0	17030000	28472000	19196000
1023	NAVHVNLFETPVEAQYVR	DVNKKHKEFVGNWNKNAVHVNLFETPVEAQ	HVNLFETPVEAQYVRLYPTSCHTACTLRFE	K	N	A	V	R	L	18	0	2085.06	B3KTQ2;A0A024RC55;Q08431;B4E396;X6R3G6;A0A024RC59;H0YKS8;A0A087WUV5	B3KTQ2	181	198	MFGE8	Lactadherin;Lactadherin short form;Medin	yes	no	3	6.6321e-09	132.61	0	0	14868000	0	0	0	0	165600000	0	98	1146;1147	7579;7580;7581;7582	11221;11222;11223;11224;11225;11226;11227;11228	11224	214		8	0	0	15942000	0	0	0	0	12942000	0
1024	NCQDIDECVTGIHNCSINETCFNIQGGFR	CSCPSSGYRLAPNGRNCQDIDECVTGIHNC	CSINETCFNIQGGFRCLAFECPENYRRSAA	R	N	C	F	R	C	29	0	3457.45	P23142;Q8NBH6;B4DUV1;B1AHL2	P23142	522	550	FBLN1	Fibulin-1	yes	no	3	2.5771e-67	184.88	0	35174000	0	0	0	0	0	0	0	551	1148	7583	11229	11229	994;995		1	0	29715000	0	0	0	0	0	0	0
1025	NCSAAPQPEPAAGLASYPELR	RLHRLLRDSEAFCHRNCSAAPQPEPAAGLA	QPEPAAGLASYPELRLFGGLLRRAHCLKRC	R	N	C	L	R	L	21	0	2198.04	B3KS71;C9JP16;Q8NB01;B3KME2;O75718;B3KUP0;B3KQR7	B3KS71	29	49	CRTAP	Cartilage-associated protein	yes	no	2	5.2802e-35	195.2	0	0	0	0	0	0	0	150960000	0	339	1149	7584	11230	11230	621		1	0	0	0	0	0	0	0	11797000	0
1026	NCTDIDECR	KCRCDSGFALDSEERNCTDIDECRISPDLC	LDSEERNCTDIDECRISPDLCGRGQCVNTP	R	N	C	C	R	I	9	0	1181.44	A0A384MDM4;P35555;Q75N88;Q9NP01;D6RJI3;A8KAY2;A0A087WYV8;Q75N90;P35556	A0A384MDM4	1067	1075	FBN1;FBN2;FBN3	Fibrillin-1;Fibrillin-3;Fibrillin-2	yes	no	2	1.4169e-26	225.4	0	25964000	22790000	913440000	0	17476000	1260300000	655870000	633240000	242	1150	7585;7586;7587;7588;7589;7590;7591;7592	11231;11232;11233;11234;11235;11236;11237;11238;11239;11240;11241	11237	445		11	0	21935000	24435000	445230000	0	15040000	162820000	51258000	68723000
1027	NCTNISCSDSLSYASEDALK	WLVSNTVDASVGLWKNCTNISCSDSLSYAS	SCSDSLSYASEDALKTVQAFMILSIIFCVI	K	N	C	L	K	T	20	0	2233.95	F5GYV0;A0A024RAT0;P54849	F5GYV0	43	62	EMP1	Epithelial membrane protein 1	yes	no	2	1.7549e-225	312.78	0	0	0	0	0	0	514290000	827960000	467460000	94	1151	7593;7594;7595;7596;7597	11242;11243;11244;11245;11246;11247;11248	11248	197		7	0	0	0	0	0	0	66442000	64707000	50731000
1028	NCTSLHTYKPR	LRTKKSLKAIHLQFKNCTSLHTYKPRFCGV	LQFKNCTSLHTYKPRFCGVCSDGRCCTPHN	K	N	C	P	R	F	11	0	1375.67	B4DFW1;A0A024R9J4;P48745	B4DFW1	265	275	NOV	Protein NOV homolog	yes	no	3	0.021584	66.262	0	0	0	0	0	6774700	0	0	0	83	1152	7598	11249	11249	167		1	0	0	0	0	0	5830100	0	0	0
1029	NDRNSSDETFLK	VVTDQIPVFVTMFQKNDRNSSDETFLKDLP	FQKNDRNSSDETFLKDLPIMFDVLIHDPSH	K	N	D	L	K	D	12	1	1424.65	B4DLL8;B4DLJ7;B2R5R1;A8K7R3;A0A024RA55;A0A3B3ISS6;B4E3D4;Q14956;B4DZS5;B4DN79;B4DLL5	B4DLL8	129	140	GPNMB	Transmembrane glycoprotein NMB	yes	no	2	8.5045e-09	138.89	0	0	0	0	0	0	0	0	0	86	1153	7599;7600	11250;11251	11250	174		2	0	0	0	0	0	0	0	0	0
1030	NDTLQEAK	KKKVDVVICLSTTVRNDTLQEAKEHRVSLK	CLSTTVRNDTLQEAKEHRVSLKCRRQLRVE	R	N	D	A	K	E	8	0	917.445	Q92896	Q92896	786	793	GLG1	Golgi apparatus protein 1	yes	yes	2	0.0032684	144.38	0	0	0	0	0	0	10453000	33178000	14381000	647	1154	7601;7602;7603	11252;11253;11254	11253	1210		3	0	0	0	0	0	0	1350400	2592900	1560700
1032	NELMLNSSLMR	FFVNPAPPYLWPAHKNELMLNSSLMRITLR	PAHKNELMLNSSLMRITLRNLEEVEFCVED	K	N	E	M	R	I	11	0	1306.64	O00468	O00468	130	140	AGRN	Agrin;Agrin N-terminal 110 kDa subunit;Agrin C-terminal 110 kDa subunit;Agrin C-terminal 90 kDa fragment;Agrin C-terminal 22 kDa fragment	yes	yes	2	0.0097996	83	0	0	0	4155100	0	0	0	0	0	503	1156	7605	11256	11256	885		1	0	0	0	2025300	0	0	0	0	0
1033	NETLALPAESK	LMFEISDALKTQLAKNETLALPAESKTPEV	QLAKNETLALPAESKTPEVEKISARPTTVT	K	N	E	S	K	T	11	0	1171.61	A0A1S5UZ16;D3YTG3;Q7Z7G0;Q9H717;Q5JPC9;H7C4X4;H0YCP4	A0A1S5UZ16	313	323	ABI3BP;DKFZp667H216	Target of Nesh-SH3	yes	no	2	2.1457e-05	150.61	28475000	52267000	0	98954000	44004000	56397000	528690000	797170000	684710000	214	1157	7606;7607;7608;7609;7610;7611;7612;7613	11257;11258;11259;11260;11261;11262;11263;11264	11263	400		8	28475000	44156000	0	48233000	53633000	48534000	68302000	62300000	74309000
1034	NETMMALWEECKPCLK	______________________________	ETMMALWEECKPCLKQTCMKFYARVCRSGS	-	N	E	L	K	Q	16	0	2038.9	Q6LDQ3	Q6LDQ3	1	16			yes	yes	2;3	2.5306e-47	225.23	61522000	27665000	7225500	0	0	0	22727000	46422000	53405000	609	1158	7614;7615;7616;7617;7618;7619;7620	11265;11266;11267;11268;11269;11270;11271;11272	11266	1140		8	61522000	23372000	7747200	0	0	0	2936100	3628000	5795900
1036	NFTAADWGQSR	EPRLSIIATDHTYRRNFTAADWGQSRDAEE	TYRRNFTAADWGQSRDAEEAISQTIDTIVD	R	N	F	S	R	D	11	0	1251.56	A0A087X0S5;A0A384P5H7;P12109;B4DRR8;D3DSM7;B4DQV1	A0A087X0S5	212	222	COL6A1	Collagen alpha-1(VI) chain	yes	no	2	8.9059e-72	257.88	26731000	69586000	28366000	1791900000	94914000	180380000	2903700000	3002600000	3266200000	141	1160	7624;7625;7626;7627;7628;7629;7630;7631;7632;7633	11276;11277;11278;11279;11280;11281;11282;11283;11284;11285;11286;11287;11288	11278	276		13	26731000	58787000	30414000	873420000	115680000	155230000	375140000	234660000	354470000
1038	NFVITYNR	PLSQDLPVKMASIFKNFVITYNRTYESKEA	KMASIFKNFVITYNRTYESKEARWRLSVFV	K	N	F	N	R	T	8	0	1025.53	H0YD65;A0A024R5G9;Q9UBX1;Q6FHS1;E9PSC2	H0YD65	38	45	CTSF	Cathepsin F	yes	no	2	0.0033759	158.03	145710000	106170000	130510000	21436000	29341000	42829000	0	297080000	355420000	43	1162	7641;7642;7643;7644;7645;7646;7647;7648	11296;11297;11298;11299;11300;11301;11302;11303;11304;11305;11306	11296	72		11	145710000	89695000	139930000	10448000	35761000	36857000	0	23217000	38572000
1039	NGDNMLEPSANMPWFKGWK	IVAAGVGEFEAGISKNGDNMLEPSANMPWF	MLEPSANMPWFKGWKVTRKDGNASGTTLLE	K	N	G	W	K	V	19	1	2221.01	B4DNE0	B4DNE0	130	148			yes	yes	2	0.022464	48.568	0	0	0	0	0	0	0	0	0	381	1163	7649	11307	11307	689;690	71	1	0	0	0	0	0	0	0	0	0
1040	NGGICTDLVANYSCECPGEFMGR	HCQHNINECEVEPCKNGGICTDLVANYSCE	VANYSCECPGEFMGRNCQYKCSGPLGIEGG	K	N	G	G	R	N	23	0	2606.07	O43854	O43854	130	152	EDIL3	EGF-like repeat and discoidin I-like domain-containing protein 3	yes	yes	2	1.2388e-82	185.95	0	0	0	0	0	0	0	0	0	510	1164	7650;7651	11308;11309	11309	899;900		2	0	0	0	0	0	0	0	0	0
1041	NGTLVAFR	NICNGKPVDGLTTLRNGTLVAFRGHYFWML	DGLTTLRNGTLVAFRGHYFWMLSPFSPPSP	R	N	G	F	R	G	8	0	876.482	A0A024R930;Q92954;B3KQ20;A0A0U1RR20	A0A024R930	1159	1166	PRG4	Proteoglycan 4;Proteoglycan 4 C-terminal part	yes	no	2	0.0032684	165.52	58041000	52913000	19587000	63663000	32958000	66409000	164560000	161070000	176730000	75	1165	7652;7653;7654;7655;7656;7657;7658;7659;7660	11310;11311;11312;11313;11314;11315;11316;11317;11318;11319	11316	128		10	58041000	44701000	21001000	31031000	40169000	57150000	21259000	12588000	19180000
1042	NGTLVIR	LMTPNTRIQRFEVLKNGTLVIRKVQVQDRG	IQRFEVLKNGTLVIRKVQVQDRGQYMCTAS	K	N	G	I	R	K	7	0	771.46	Q9NR99	Q9NR99	1910	1916	MXRA5	Matrix-remodeling-associated protein 5	yes	yes	2	0.020876	114.19	0	0	0	0	0	0	0	0	0	662	1166	7661	11320	11320	1232		1	0	0	0	0	0	0	0	0	0
1043	NGTSSGLGPSCSDAPTTPIK	SCGVPGPQGKALQKRNGTSSGLGPSCSDAP	GLGPSCSDAPTTPIKQKARFKIRDAKCHLR	R	N	G	I	K	Q	20	0	1945.91	Q8IWY4	Q8IWY4	466	485	SCUBE1	Signal peptide, CUB and EGF-like domain-containing protein 1	yes	yes	2	3.9401e-14	135.47	0	0	0	14047000	0	0	0	0	0	634	1167	7662	11321	11321	1190		1	0	0	0	6846800	0	0	0	0	0
1045	NINYTER	FHRNLTTSLTESVDRNINYTERGVFFSVNS	SLTESVDRNINYTERGVFFSVNSWTPDSMS	R	N	I	E	R	G	7	0	908.435	P80108	P80108	319	325	GPLD1	Phosphatidylinositol-glycan-specific phospholipase D	yes	yes	2	0.021778	132.09	0	19578000	18406000	0	0	0	0	0	0	566	1169	7678;7679	11351;11352	11351	1041		0	0	16540000	19735000	0	0	0	0	0	0
1047	NISTATAAQTDLNFINDEGDTFPLR	YIGKVKASVTFLDPRNISTATAAQTDLNFI	DLNFINDEGDTFPLRTYGMFSVDFRDEVTS	R	N	I	L	R	T	25	0	2723.3	O75339	O75339	631	655	CILP	Cartilage intermediate layer protein 1;Cartilage intermediate layer protein 1 C1;Cartilage intermediate layer protein 1 C2	yes	yes	2;3	0	455.05	114520000	198340000	60591000	0	0	0	559780000	434050000	299630000	515	1172;1173	7685;7686;7687;7688;7689;7690;7691;7692;7693;7694;7695;7696	11359;11360;11361;11362;11363;11364;11365;11366;11367;11368;11369;11370;11371;11372;11373;11374;11375;11376;11377	11365	914;915;916		18	114520000	167560000	64966000	0	0	0	72319000	33922000	32517000
1048	NITAEDCSHSQDAGVR	RCSGQELSLWKCPHKNITAEDCSHSQDAGV	ITAEDCSHSQDAGVRCNLPYTGAETRIRLS	K	N	I	V	R	C	16	0	1758.76	H7C248;Q53TY1;B9A025;E7END4;P58215	H7C248	117	132	LOXL3	Lysyl oxidase homolog 3	yes	no	2	4.0572e-20	147.18	0	0	0	0	0	0	0	36382000	0	441	1174	7697;7698;7699	11378;11379;11380	11380	781		3	0	0	0	0	0	0	0	2843400	0
1050	NKTDVEYESDEK	IDVIMGGGRKYMYPKNKTDVEYESDEKARG	YPKNKTDVEYESDEKARGTRLDGLDLVDTW	K	N	K	E	K	A	12	1	1455.64	B7Z1D1;B2R6Q2;A0A024RAG0;P05186;Q9UIL5	B7Z1D1	178	189	ALPL	Alkaline phosphatase;Alkaline phosphatase, tissue-nonspecific isozyme	yes	no	2;3	1.3824e-202	319.46	0	0	0	37589000	0	0	28867000	196810000	86037000	90	1176	7714;7715;7716;7717;7718;7719	11399;11400;11401;11402;11403;11404;11405	11401	188		6	0	0	0	18322000	0	0	3729300	15381000	9337300
1051	NLAGMNINGFLKRDR	PFRSKGGPGGGGRDRNLAGMNINGFLKRDR	NLAGMNINGFLKRDRDNNIQFTVGEELFNL	R	N	L	D	R	D	15	2	1717.9	O75294	O75294	183	197	hCG_1642159		yes	yes	2	0.012619	72.643	0	0	0	0	0	0	0	0	0	514	1177	7720;7721;7722;7723	11406;11407;11408;11409	11409	906;907	97	4	0	0	0	0	0	0	0	0	0
1053	NLFLNHSENATAK	GATLINEQWLLTTAKNLFLNHSENATAKDI	AKNLFLNHSENATAKDIAPTLTLYVGKKQL	K	N	L	A	K	D	13	0	1457.73	Q6PEJ8;B3KP77;Q6NSB4;A0A087WU08;A0A0C4DGL8;J3QR68;H0Y300;P00738;H3BS21;A0A0A0MRD9;J3QLC9;P00739	Q6PEJ8	25	37	HP;HPR	Haptoglobin;Haptoglobin alpha chain;Haptoglobin beta chain;Haptoglobin-related protein	yes	no	2;3	7.5207e-93	269.99	119880000	149130000	0	435260000	0	335690000	890230000	19837000000	12860000000	344	1179;1180	7728;7729;7730;7731;7732;7733;7734;7735;7736;7737;7738	11417;11418;11419;11420;11421;11422;11423;11424;11425;11426;11427;11428;11429;11430;11431	11428	628;629		15	119880000	125990000	0	212160000	0	288880000	115010000	1550300000	1395700000
1054	NLGGLETEDDYSYQGHMQSCNFSAEK	ACMGGLPSNAYSAIKNLGGLETEDDYSYQG	SYQGHMQSCNFSAEKAKVYINDSVELSQNE	K	N	L	E	K	A	26	0	2979.23	H0YD65;A0A024R5G9;Q9UBX1	H0YD65	195	220	CTSF	Cathepsin F	yes	no	3	1.9683e-19	108.57	0	0	0	0	0	0	0	0	0	43	1181	7739	11432	11432	73		1	0	0	0	0	0	0	0	0	0
1056	NLHQSNTSR	SVQPSDAGVYICTCRNLHQSNTSRAELLVT	YICTCRNLHQSNTSRAELLVTEAPSKPITV	R	N	L	S	R	A	9	0	1055.51	A0A024RAB6;P98160	A0A024RAB6	1705	1713	HSPG2	Basement membrane-specific heparan sulfate proteoglycan core protein;Endorepellin;LG3 peptide	yes	no	2;3	0.00084191	128.36	0	26701000	3304100	468950000	168860000	26750000	96276000	185040000	0	89	1183	7755;7756;7757;7758;7759;7760;7761;7762;7763	11448;11449;11450;11451;11452;11453;11454;11455;11456;11457;11458;11459;11460;11461;11462;11463;11464;11465;11466;11467;11468	11464	183		19	0	22558000	3542700	228580000	205800000	23021000	12438000	14461000	0
1059	NLNNSQSDVVSFR	DTKKTIQFDFQILSKNLNNSQSDVVSFRLS	SKNLNNSQSDVVSFRLSVEAQAQVTLNGVS	K	N	L	F	R	L	13	0	1478.71	B2R627;A8K6A5;A0A024RB01;P08648	B2R627	771	783	ITGA5	Integrin alpha-5;Integrin alpha-5 heavy chain;Integrin alpha-5 light chain	yes	no	2	6.3369e-182	247.08	12821000	0	0	108510000	0	0	0	721810000	240760000	95	1186	7770;7771;7772;7773;7774;7775;7776;7777	11475;11476;11477;11478;11479;11480;11481;11482	11480	204		8	12821000	0	0	52890000	0	0	0	56411000	26129000
1060	NLNSQDIK	GQKLNNCTKKPNLSKNLNSQDIK_______	KKPNLSKNLNSQDIK_______________	K	N	L	I	K	-	8	0	930.477	B7Z9G1;B7Z8N8;Q5SZJ8	B7Z9G1	76	83	BEND6	BEN domain-containing protein 6	yes	no	2	0.0071239	118.69	0	40259000	30076000	35585000	0	0	0	264000000	319520000	431	1187	7778;7779;7780;7781;7782	11483;11484;11485;11486;11487;11488	11485	769		6	0	34011000	32247000	17345000	0	0	0	20632000	34676000
1063	NLQVYNATSNSLTVK	TLPILTTQAPKSGPRNLQVYNATSNSLTVK	NLQVYNATSNSLTVKWDPASGRVQKYRITY	R	N	L	V	K	W	15	0	1650.86	A0A087X0A8;B9EJB8;D6RGG3;Q99715;H0Y4P7	A0A087X0A8	569	583	COL12A1	Collagen alpha-1(XII) chain	yes	no	2	3.5354e-29	213.38	70005000	42722000	33865000	641020000	144310000	321140000	228700000	510910000	379160000	138	1190	7793;7794;7795;7796;7797;7798;7799;7800;7801;7802;7803;7804	11503;11504;11505;11506;11507;11508;11509;11510;11511;11512;11513;11514;11515;11516;11517;11518;11519;11520;11521;11522;11523;11524;11525;11526	11518	268		23	70005000	36092000	36310000	312450000	175880000	276360000	29546000	39929000	41148000
1064	NLSMIVEEMK	ERFSLLSARLDLNVRNLSMIVEEMKAVDTQ	DLNVRNLSMIVEEMKAVDTQHGEILRNVTI	R	N	L	M	K	A	10	0	1192.58	Q6AZY7	Q6AZY7	430	439	SCARA3	Scavenger receptor class A member 3	yes	yes	2	0.005952	106.2	0	0	0	0	0	0	0	15055000	0	605	1191	7805	11527	11527	1135		1	0	0	0	0	0	0	0	1176500	0
1065	NLSVVILGASDK	PFIYPTVAEVCDDAKNLSVVILGASDKDLH	DAKNLSVVILGASDKDLHPNTDPFKFEIHK	K	N	L	D	K	D	12	0	1214.69	B7Z236;B7Z3H7;P55290;B7Z985;B7Z9B1	B7Z236	300	311	CDH13	Cadherin-13	yes	no	2	1.0187e-05	160.18	0	0	0	14891000	0	0	40066000	47442000	0	416	1192	7806;7807;7808;7809;7810;7811;7812	11528;11529;11530;11531;11532;11533;11534;11535;11536	11529	747		9	0	0	0	7258400	0	0	5176100	3707700	0
1067	NLTEVVPQLLDQLR	SAYNTAVNSARDAVRNLTEVVPQLLDQLRT	RNLTEVVPQLLDQLRTVEQKRPASNVSASI	R	N	L	L	R	T	14	0	1636.91	B7Z938;Q5D044;H0UI49;A0A0A0MTC7;A0A0A0MQS9;Q16363	B7Z938	787	800	LAMA4	Laminin subunit alpha-4	yes	no	2	2.8773e-09	162.68	0	0	0	0	0	0	0	44151000	0	148	1194	7814	11538	11538	301		1	0	0	0	0	0	0	0	3450500	0
1068	NLTHLESLHLEDNALK	LSNNSLVSLTYVSFRNLTHLESLHLEDNAL	LTHLESLHLEDNALKVLHNGTLAELQGLPH	R	N	L	L	K	V	16	0	1845.96	Q13641	Q13641	256	271	TPBG	Trophoblast glycoprotein	yes	yes	3	0.003726	72.187	0	0	0	4865800	0	0	0	0	0	580	1195	7815;7816	11539;11540	11540	1090		2	0	0	0	2371800	0	0	0	0	0
1069	NLTVCPDGALFEQK	DLKKFLKPYTLEEQKNLTVCPDGALFEQKG	KNLTVCPDGALFEQKGPVYVACQFPISLLQ	K	N	L	Q	K	G	14	0	1590.77	C9JA36;D3DNF9;P54709	C9JA36	67	80	ATP1B3	Sodium/potassium-transporting ATPase subunit beta-3	yes	no	2	2.8643e-09	142.97	0	0	0	19665000	0	0	0	89495000	83489000	445	1196	7817;7818;7819	11541;11542;11543	11541	787		3	0	0	0	9585400	0	0	0	6994200	9060800
1070	NLTVPGSLR	FIIQVQEANKVEAARNLTVPGSLRAVDIPG	KVEAARNLTVPGSLRAVDIPGLKAATPYTV	R	N	L	L	R	A	9	0	955.545	P24821;E9PC84;J3QSU6;A0A024R884;Q4LE33;A7MBN2;H0YGZ3	P24821	1119	1127	TNC;TNC variant protein	Tenascin	yes	no	2	0.017791	96.492	0	0	0	0	0	155980000	302530000	0	0	553	1197	7820;7821	11544;11545	11545	1009		2	0	0	0	0	0	134230000	39084000	0	0
1072	NMSFVNDLTVTQDGR	EVKLLLSSETPIEGKNMSFVNDLTVTQDGR	NMSFVNDLTVTQDGRKIYFTDSSSKWQRRD	K	N	M	G	R	K	15	0	1695.79	H0Y512;Q9HDC9	H0Y512	181	195	APMAP	Adipocyte plasma membrane-associated protein	yes	no	2	5.9417e-29	211.67	0	0	0	15461000	0	0	0	47393000	0	489	1199	7826;7827	11554;11555;11556	11555	867		3	0	0	0	7536100	0	0	0	3703900	0
1073	NMSNQLGLLAVNQR	SMVYGSEEPLARNLRNMSNQLGLLAVNQRF	RNMSNQLGLLAVNQRFQDNGRALLPFDNLH	R	N	M	Q	R	F	14	0	1556.81	P05164	P05164	355	368	MPO	Myeloperoxidase;Myeloperoxidase;89 kDa myeloperoxidase;84 kDa myeloperoxidase;Myeloperoxidase light chain;Myeloperoxidase heavy chain	yes	yes	2	0.010113	87.184	0	0	0	0	0	0	0	0	0	531	1200	7828	11557	11557	948	102	1	0	0	0	0	0	0	0	0	0
1074	NMTFDLPSDATVVLNR	SAAFSVNYDTKSGPKNMTFDLPSDATVVLN	MTFDLPSDATVVLNRSSCGKENTSDPSLVI	K	N	M	N	R	S	16	0	1791.88	B3KRY3;A0A024RDY3;P11279;Q59FZ0	B3KRY3	40	55	LAMP1	Lysosome-associated membrane glycoprotein 1	yes	no	2	1.3447e-15	184.1	0	0	0	0	0	0	0	224240000	0	106	1201;1202	7829;7830	11558;11559;11560	11558	232;233	20	3	0	0	0	0	0	0	0	17525000	0
1075	NMTISR	RRALFLYSRSPSHSKNMTISRGGLMQCEEL	YSRSPSHSKNMTISRGGLMQCEELIAYLRD	K	N	M	S	R	G	6	0	720.359	L7RXH0;A5YM53;P06756	L7RXH0	554	559	ITGAV	Integrin alpha-V;Integrin alpha-V heavy chain;Integrin alpha-V light chain	yes	no	2	0.013034	118.01	0	0	0	0	0	0	0	0	0	285	1203	7831;7832	11561;11562	11562	533		2	0	0	0	0	0	0	0	0	0
1076	NMTLFSDLVAEK	ENLYSIACDKPQQVRNMTLFSDLVAEKFID	QVRNMTLFSDLVAEKFIDDMEDVLCPDPQI	R	N	M	E	K	F	12	0	1366.68	A0A384MDP3;P12110;Q9BUM6	A0A384MDP3	785	796	COL6A2	Collagen alpha-2(VI) chain	yes	no	1;2	1.7899e-46	240.12	440670000	371960000	252790000	8284500000	1321900000	2011600000	15545000000	19086000000	17951000000	243	1204;1205	7833;7834;7835;7836;7837;7838;7839;7840;7841;7842;7843;7844;7845;7846;7847;7848;7849;7850;7851;7852;7853;7854;7855;7856;7857;7858;7859;7860;7861	11563;11564;11565;11566;11567;11568;11569;11570;11571;11572;11573;11574;11575;11576;11577;11578;11579;11580;11581;11582;11583;11584;11585;11586;11587;11588;11589;11590;11591;11592;11593;11594;11595;11596;11597;11598;11599;11600;11601;11602;11603	11589	452	51	41	440670000	314230000	271040000	4038100000	1611100000	1731200000	2008300000	1491600000	1948100000
1077	NNATVHEQVGGPSLTSDLQAQSK	MPEDEYTVYDDGEEKNNATVHEQVGGPSLT	VGGPSLTSDLQAQSKGNPEQTPVLKP____	K	N	N	S	K	G	23	0	2380.16	F5GX75;B7Z553;D9ZGG2;P04004	F5GX75	85	107	VTN	Vitronectin;Vitronectin V65 subunit;Vitronectin V10 subunit;Somatomedin-B	yes	no	2;3	0	501.38	470870000	1387400000	264220000	1774500000	441200000	644950000	14654000000	9810100000	12288000000	424	1206;1207	7862;7863;7864;7865;7866;7867;7868;7869;7870;7871;7872;7873;7874;7875;7876;7877;7878;7879;7880	11604;11605;11606;11607;11608;11609;11610;11611;11612;11613;11614;11615;11616;11617;11618;11619;11620;11621;11622;11623;11624;11625;11626;11627;11628;11629;11630;11631;11632;11633;11634	11610	760;761		30	470870000	1172100000	283300000	864970000	537730000	555020000	1893200000	766680000	1333600000
1078	NNHTASILDR	EFNNNFRQQMENYPKNNHTASILDRMQADF	ENYPKNNHTASILDRMQADFKCCGAANYTD	K	N	N	D	R	M	10	0	1139.57	F8VV56;F8W022;F8VWK8;A0A024RB05;P08962;W6A4U0	F8VV56	36	45	CD63	Tetraspanin;CD63 antigen	yes	no	2;3	1.343e-127	290.2	36485000	52058000	52046000	392160000	312690000	293670000	1029100000	3855300000	1269000000	96	1208	7881;7882;7883;7884;7885;7886;7887;7888;7889;7890;7891;7892;7893;7894	11635;11636;11637;11638;11639;11640;11641;11642;11643;11644;11645;11646;11647;11648;11649;11650;11651;11652;11653;11654	11653	207;208		17	36485000	43979000	55804000	191150000	381100000	252730000	132950000	301300000	137720000
1079	NNITSSGIGPK	AFNGLPNLERLDLSKNNITSSGIGPKAFKL	DLSKNNITSSGIGPKAFKLLKKLMRLNMDG	K	N	N	P	K	A	11	0	1086.57	B4DPC6;B4E1N8;Q3KR19;B4DK93;O94769	B4DPC6	45	55	ECM2	Extracellular matrix protein 2	yes	no	1;2	5.644e-08	188.66	29764000	39730000	57562000	192130000	164630000	215630000	1840400000	1867000000	1341800000	375	1209	7895;7896;7897;7898;7899;7900;7901;7902;7903;7904;7905	11655;11656;11657;11658;11659;11660;11661;11662;11663;11664;11665;11666;11667;11668;11669;11670	11665	680;681		15	29764000	33564000	61719000	93651000	200650000	185570000	237760000	145910000	145620000
1081	NNSDISSTR	QDFLPDSITFSWKYKNNSDISSTRGFPSVL	FSWKYKNNSDISSTRGFPSVLRGGKYAATS	K	N	N	T	R	G	9	0	992.452	P01871;A0A1B0GUU9	P01871	46	54	IGHM	Ig mu chain C region	yes	no	2	0.00020113	187.78	0	0	1768500	91457000	12165000	95761000	59259000	143820000	134280000	521	1211	7910;7911;7912;7913;7914;7915;7916	11675;11676;11677;11678;11679;11680;11681;11682;11683	11681	930;931		9	0	0	1896200	44579000	14826000	82409000	7655800	11240000	14573000
1083	NNTIVNELVR	VLERGAYTQVIFLARNNTIVNELVRVTSEG	IFLARNNTIVNELVRVTSEGAGLQLQKVTV	R	N	N	V	R	V	10	0	1170.64	A0A024R8Q1;P10253	A0A024R8Q1	882	891	GAA	Lysosomal alpha-glucosidase;76 kDa lysosomal alpha-glucosidase;70 kDa lysosomal alpha-glucosidase	yes	no	2	0.0079467	102.07	0	0	0	5842100	0	0	0	0	0	71	1213	7918;7919	11685;11686	11686	122;123		2	0	0	0	2847600	0	0	0	0	0
1084	NNVITLNITGK	AYVAVDGIPQGVLERNNVITLNITGKAGAT	VLERNNVITLNITGKAGATLDLLVENMGRV	R	N	N	G	K	A	11	0	1185.67	E7EQ29;B7Z5H9;Q53H18;Q53G40;B7Z6Q5;P16278	E7EQ29	327	337	GLB1	Beta-galactosidase	yes	no	2	0.0029197	109.66	0	0	0	11611000	7919800	0	0	0	0	425	1214	7920;7921	11687;11688	11687	762		2	0	0	0	5659600	9652700	0	0	0	0
1085	NNVTTNIPSAFSGTLTHEEK	QMAVAPGHLRAWVMRNNVTTNIPSAFSGTL	NIPSAFSGTLTHEEKAVLTVFTGTATAVHV	R	N	N	E	K	A	20	0	2159.05	E9PGV9	E9PGV9	100	119	ABCG1		yes	yes	3	0.019194	49.973	0	0	16629000	0	0	0	0	0	0	474	1215	7922	11689	11689	844		1	0	0	17830000	0	0	0	0	0	0
1086	NPCTSEQNCTSPFSYK	KTVMPYISTTPAKLRNPCTSEQNCTSPFSY	PCTSEQNCTSPFSYKNVLSLTNKGEVFNEL	R	N	P	Y	K	N	16	0	1918.78	P05556	P05556	205	220	ITGB1	Integrin beta-1	yes	yes	2	0	351.06	0	15015000	7766100	38275000	0	0	0	0	0	534	1216	7923;7924;7925;7926;7927;7928	11690;11691;11692;11693;11694;11695	11692	959		6	0	12685000	8326800	18656000	0	0	0	0	0
1087	NPNLTISFTAER	QAWEKEFINFVKNYKNPNLTISFTAERSIE	NYKNPNLTISFTAERSIEDELNRESDSDVF	K	N	P	E	R	S	12	0	1361.69	B4DIP7;A0A0S2A5C8;K7EQ23;A0A193DRS0;A0A0A8JCD0;Q59GR1;O15118	B4DIP7	441	452	NPC1	Niemann-Pick C1 protein	yes	no	2	0.004359	106.4	0	0	0	3848100	0	0	0	0	0	159	1217	7929	11696	11696	320		1	0	0	0	1875700	0	0	0	0	0
1088	NPPMGGNVVIFDTVITNQEEPYQNHSGR	NIKDQPRPAFSAIRRNPPMGGNVVIFDTVI	VITNQEEPYQNHSGRFVCTVPGYYYFTFQV	R	N	P	G	R	F	28	0	3112.47	X6RLJ0;A0A024RAG6;P02745	X6RLJ0	123	150	C1QA	Complement C1q subcomponent subunit A	yes	no	2;3;4	0	390.81	359760000	205210000	264710000	4807100000	268550000	322940000	11119000000	6801700000	6628500000	91	1218;1219;1220	7930;7931;7932;7933;7934;7935;7936;7937;7938;7939;7940;7941;7942;7943;7944;7945;7946;7947;7948;7949;7950;7951;7952;7953;7954;7955	11697;11698;11699;11700;11701;11702;11703;11704;11705;11706;11707;11708;11709;11710;11711;11712;11713;11714;11715;11716;11717;11718;11719;11720;11721;11722;11723;11724;11725;11726;11727;11728;11729;11730;11731;11732;11733;11734;11735;11736;11737;11738;11739;11740;11741	11740	189;190	14	44	359760000	173360000	283830000	2343100000	327310000	277920000	1436400000	531570000	719360000
1092	NSSELAQR	EEYERNIEEMVAQLRNSSELAQRKCEVNLQ	EMVAQLRNSSELAQRKCEVNLQLWMSNKRS	R	N	S	Q	R	K	8	0	903.441	Q6IAG3;Q9UHF5	Q6IAG3	75	82	IL17B	Interleukin-17B	yes	no	2	0.019723	98.523	0	0	2363900	0	0	0	9586300	0	0	608	1225	7993;7994	11800;11801	11801	1139		2	0	0	2534600	0	0	0	1238500	0	0
1094	NSTVMAR	FMGLPTKDDNLEHYKNSTVMARAEYFRNVD	DDNLEHYKNSTVMARAEYFRNVDYLLIHGT	K	N	S	A	R	A	7	0	777.38	A0A172Q3A0;A0A0D9SEN1;B2RD89;A0A140GPP7;Q12884;B4DLR2;H0YG61	A0A172Q3A0	652	658	FAP	Prolyl endopeptidase FAP;Antiplasmin-cleaving enzyme FAP, soluble form	yes	no	2	0.027026	110.63	0	0	0	0	0	0	0	30024000	0	168	1227	7996	11803	11803	329		0	0	0	0	0	0	0	0	2346400	0
1097	NTTAECWDEK	DIAPSTDDLASLSEKNTTAECWDEKFTC__	SLSEKNTTAECWDEKFTC____________	K	N	T	E	K	F	10	0	1252.5	F5H1C0;F5H2W4;H0YG03;A8K3H0;Q13361	F5H1C0	79	88	MFAP5	Microfibrillar-associated protein 5	yes	no	2	0.00056353	121.73	0	0	0	237470000	0	0	0	138320000	0	296	1230	8001;8002;8003;8004;8005	11810;11811;11812;11813;11814	11810	554		5	0	0	0	115750000	0	0	0	10810000	0
1100	NTTSYVLR	YSLPTGQWVGVQLPRNTTSYVLRGLEPGQE	VGVQLPRNTTSYVLRGLEPGQEYNVLLTAE	R	N	T	L	R	G	8	0	952.498	P24821;E9PC84;J3QSU6;A0A024R884;Q4LE33;A7MBN2;F5H7V9;D3YHM4	P24821	1034	1041	TNC;TNC variant protein	Tenascin	yes	no	2	0.0039957	130.77	0	0	0	3480100000	1119700000	2175100000	11681000000	14550000000	10750000000	553	1233	8008;8009;8010;8011;8012;8013;8014;8015	11817;11818;11819;11820;11821;11822;11823;11824	11821	1010		8	0	0	0	1696300000	1364700000	1871800000	1509100000	1137100000	1166600000
1102	NVCGGQCCPGWTTANSTNHCIKPVCEPPCQNR	GAAPPTPPRGRLTGRNVCGGQCCPGWTTAN	NHCIKPVCEPPCQNRGSCSRPQLCVCRSGF	R	N	V	N	R	G	32	0	3758.57	Q59EE6;G3V511;G3V3X5;Q6AZ94;Q14767	Q59EE6	46	77	LTBP2	Latent-transforming growth factor beta-binding protein 2	yes	no	4	2.6642e-58	163.19	0	0	46344000	0	0	0	0	0	0	484	1235	8022	11831;11832;11833	11832	857		3	0	0	49691000	0	0	0	0	0	0
1105	NVSVAEGK	TVVIQPTVLRAAVPKNVSVAEGKELDLTCN	LRAAVPKNVSVAEGKELDLTCNITTDRADD	K	N	V	G	K	E	8	0	802.418	A4QPA1;Q1WWL2;Q4QQP8;Q9P2B2	A4QPA1	60	67	PTGFRN	Prostaglandin F2 receptor negative regulator	yes	no	2	0.024308	87.181	0	0	0	0	0	0	17468000	0	0	279	1238	8025	11836	11836	522		1	0	0	0	0	0	0	2256700	0	0
1106	NVTAQICIDK	VKENYAELLEDAFLKNVTAQICIDKKCPDY	DAFLKNVTAQICIDKKCPDYTCPITFSSPA	K	N	V	D	K	K	10	0	1160.59	A0A087X0S5;A0A384P5H7;P12109;Q8TBN2	A0A087X0S5	802	811	COL6A1	Collagen alpha-1(VI) chain	yes	no	2	0.00031106	152.28	0	0	0	809200000	191550000	423380000	613280000	671190000	589080000	141	1239	8026;8027;8028;8029;8030;8031	11837;11838;11839;11840;11841;11842;11843;11844	11839	274		8	0	0	0	394430000	233460000	364350000	79230000	52455000	63931000
1107	NVTHHVSVTK	DLQTMLRDLQLQILRNVTHHVSVTKQLPTS	LQILRNVTHHVSVTKQLPTSEAVVSAVSEA	R	N	V	T	K	Q	10	0	1120.6	B4E278;H0Y6N5;H0Y742;A7MCZ7;E9PHI4;A0A146IHP0;A4D2Q0;O94901;H7C2K3	B4E278	359	368	SUN1;UNC84A	SUN domain-containing protein 1	yes	no	2;3	0.001525	164.33	0	0	0	13037000	0	0	0	21224000	0	203	1240	8032;8033	11845;11846	11845	382		2	0	0	0	6354400	0	0	0	1658700	0
1108	NVTHLLQQELTEAQK	SEACRDGLRAVMECRNVTHLLQQELTEAQK	NVTHLLQQELTEAQKGFQDVEAQAATCNHT	R	N	V	Q	K	G	15	0	1750.92	B4E0Z6;A0A024R7H5;Q10589	B4E0Z6	65	79	BST2	Bone marrow stromal antigen 2	yes	no	3	0.00055739	94.461	0	0	0	0	0	0	0	0	0	59	1241	8034	11847	11847	99		1	0	0	0	0	0	0	0	0	0
1109	NVTLILDCK	SDGKWHRIALSVHKKNVTLILDCKKKTTKF	LSVHKKNVTLILDCKKKTTKFLDRSDHPMI	K	N	V	C	K	K	9	0	1074.57	Q59EE7;B2ZZ86;A0A024R8E5;P20908	Q59EE7	130	138	COL5A1	Collagen alpha-1(V) chain	yes	no	2	0.0027879	121.05	0	0	0	18056000	0	0	66089000	66075000	28094000	69	1242	8035;8036;8037;8038	11848;11849;11850;11851;11852	11849	116		5	0	0	0	8801000	0	0	8538100	5163900	3049000
1110	NVTTVLNDPNPIWLVGR	YDYDLTHIVAAYQERNVTTVLNDPNPIWLV	TTVLNDPNPIWLVGRAADAPFVINAIIRYP	R	N	V	G	R	A	17	0	1907.03	B7Z5I3;H3BTN6;Q9H6L2	B7Z5I3	74	90	TMEM231	Transmembrane protein 231	yes	no	2	7.068e-80	243.53	0	0	0	19747000	0	0	0	98096000	0	426	1243	8039;8040	11853;11854	11853	763		2	0	0	0	9625000	0	0	0	7666400	0
1113	NYIVPILWLNETGTIGDEK	______________________________	PILWLNETGTIGDEKANMFRSQVTGKINLL	R	N	Y	E	K	A	19	0	2174.13	A0A0H3WBE8;A0A0G3VRE1;E9PLT1;B7Z6C3;E7EU05;D9IX65;D9IX64;B3KUB8;A4D1B1;P16671	A0A0H3WBE8	8	26	CD36	Platelet glycoprotein 4	yes	no	2	6.2931e-55	223.06	0	0	0	0	0	0	105040000	250370000	294470000	174	1246	8043;8044;8045	11857;11858;11859	11858	342		3	0	0	0	0	0	0	13571000	19567000	31958000
1114	NYTLTGR	PLTVCKMHVLHCQGRNYTLTGRDSCTLPAS	HVLHCQGRNYTLTGRDSCTLPASAEKACGA	R	N	Y	G	R	D	7	0	823.419	A8K2T4;B2R6W1;P10643	A8K2T4	754	760	C7	Complement component C7	yes	no	2	0.020876	114.19	0	0	0	0	0	0	0	0	0	295	1247	8046	11860	11860	553		1	0	0	0	0	0	0	0	0	0
1115	NYTLWR	QCGTCNEFKECHAIRNYTLWRVGDYGSLSG	EFKECHAIRNYTLWRVGDYGSLSGREKMMA	R	N	Y	W	R	V	6	0	851.429	Q5U000;Q9UBR2	Q5U000	184	189	CTSZ	Cathepsin Z	yes	no	2	0.0021426	126.68	0	0	0	0	0	0	0	0	0	601	1248	8047	11861	11861	1125		1	0	0	0	0	0	0	0	0	0
1116	NYYADNQTCDGELLFNMTK	GGNNCMDMRRSLCYRNYYADNQTCDGELLF	DNQTCDGELLFNMTKKMCCCSYNIGRAWNK	R	N	Y	T	K	K	19	0	2295.98	A0A384MDM4;P35555;B4E3I6;Q59HB9;H0YND0	A0A384MDM4	1698	1716	FBN1	Fibrillin-1	yes	no	2	1.5955e-86	230.5	0	0	0	1615200000	0	0	565270000	917070000	521520000	242	1249;1250	8048;8049;8050;8051;8052;8053;8054;8055;8056;8057	11862;11863;11864;11865;11866;11867;11868;11869;11870;11871;11872;11873;11874;11875;11876;11877;11878	11873	446;447	48	17	0	0	0	787290000	0	0	73028000	71671000	56599000
1118	QAIHVGNQTFNDGTIVEK	DQLYYVKFLSLPEVRQAIHVGNQTFNDGTI	HVGNQTFNDGTIVEKYLREDTVQSVKPWLT	R	Q	A	E	K	Y	18	0	1969.99	H7C0X5;O75225;B3KW79;A0A024RA40;Q9H3G5	H7C0X5	44	61	CPVL	Probable serine carboxypeptidase CPVL	yes	no	3	1.558e-07	123.14	0	0	0	16746000	0	0	0	0	0	85	1252	8060	11881	11881	173		1	0	0	0	8162500	0	0	0	0	0
1119	QDILNNSLTTLSQDITK	EINEVKTWSNRITEKQDILNNSLTTLSQDI	ILNNSLTTLSQDITKVDQSTTSMAKDVGLK	K	Q	D	T	K	V	17	0	1902.99	Q3B7K3;Q70UQ0	Q3B7K3	57	73	IKIP;IKBIP	Inhibitor of nuclear factor kappa-B kinase-interacting protein	yes	no	2	0	318.7	0	0	0	16409000	0	0	0	0	0	589	1253	8061;8062	11882;11883	11883	1105		2	0	0	0	7998000	0	0	0	0	0
1120	QDQCIYNTTYLNVQR	NKTEDTIFLREYQTRQDQCIYNTTYLNVQR	QDQCIYNTTYLNVQRENGTISRYVGGQEHF	R	Q	D	Q	R	E	15	0	1914.89	V9HWF6;P02763	V9HWF6	87	101	HEL-S-153w;ORM1	Alpha-1-acid glycoprotein;Alpha-1-acid glycoprotein 1	yes	no	2;3	0	445.43	229300000	1493200000	859740000	1130700000	196930000	638840000	3334500000	6077200000	4352700000	525	1254	8063;8064;8065;8066;8067;8068;8069;8070;8071;8072;8073;8074;8075;8076;8077;8078;8079;8080;8081;8082	11884;11885;11886;11887;11888;11889;11890;11891;11892;11893;11894;11895;11896;11897;11898;11899;11900;11901;11902;11903;11904;11905;11906;11907;11908;11909;11910;11911;11912;11913;11914;11915;11916	11885	937		29	229300000	1261500000	921820000	551140000	240020000	549770000	430790000	474940000	472390000
1122	QECYAFNGTQR	______________________________	FQGRQECYAFNGTQRFLERYIYNREEFVRF	R	Q	E	Q	R	F	11	0	1372.58	A0A180H729;A0A0A7C596;A0A1C8DV15;A0A1C8DTY9;A0A1C8DTX3;A0A1C8DTW6;A0A1C8DTG8;A0A1C8DTF9;A0A1C8DTF2;A0A1C8DTE6;A0A1C8DTD8;A0A1C8DTB3;A0A1C8DSX4;A0A1C8DTY2;A0A1C8DTZ7;A0A1X9I4L2;A0A1X9I4M1;A0A0A7C578;A0A0A7C582;A0A0A7C583;A0A0A7C585;I3RVA4;A0A0A7C588;A0A0A7C592;H2A3H7;A0A0A7C593;A0A0A7C577;A0A0A7C595;A0A0A7C5K9;E1Y7U4;A0A1C8DU09;A0A1C8DUV9;A0A1C8DUU3;A0A0A7C650;A0A1C8DSU5;A0A1C8DSU0;A0A1C8DST7;A0A1…	A0A180H729	8	18	HLA-DPB1;HLA-DB1;MHC-DPB1*6001;HLA-DPB;HLA-DRB1;DPB1;MHC DPB1	HLA class II histocompatibility antigen, DP beta 1 chain	yes	no	2	3.9104e-06	185.6	0	0	0	93166000	0	0	0	0	0	115	1256	8084	11918;11919	11918	241		2	0	0	0	45412000	0	0	0	0	0
1123	QEDLSVGSVLLTVNATDPDSLQHQTIR	NEGPVFYPDPMMVTRQEDLSVGSVLLTVNA	VNATDPDSLQHQTIRYSVYKDPAGWLNINP	R	Q	E	I	R	Y	27	0	2935.49	B7Z236;B7Z3H7;P55290;B7Z9B1	B7Z236	189	215	CDH13	Cadherin-13	yes	no	3	9.6435e-53	178.95	0	0	0	41640000	0	0	0	0	0	416	1257	8085	11920;11921	11920	748		2	0	0	0	20296000	0	0	0	0	0
1125	QEVLSHISNMSYIGGTNQTGK	GNPHTEFLLNTYRTKQEVLSHISNMSYIGG	ISNMSYIGGTNQTGKGLEYIMQSHLTKAAG	K	Q	E	G	K	G	21	0	2263.09	D9ZGF2;P12111;C9JNG9	D9ZGF2	100	120	COL6A3	Collagen alpha-3(VI) chain	yes	no	3	1.4757e-79	243.23	0	0	0	134720000	0	110790000	0	309690000	0	468	1259	8087;8088;8089;8090;8091	11923;11924;11925;11926;11927;11928;11929	11928	824;825		7	0	0	0	65665000	0	95342000	0	24203000	0
1127	QGFGNVATNTDGKNYCGLPGEYWLGNDK	QDGSVDFGRKWDPYKQGFGNVATNTDGKNY	NYCGLPGEYWLGNDKISQLTRMGPTELLIE	K	Q	G	D	K	I	28	1	3074.38	D3DP13;B4E1D3;V9HVY1;P02675;D6REL8	D3DP13	154	181	FGB;HEL-S-78p	Fibrinogen beta chain;Fibrinopeptide B;Fibrinogen beta chain	yes	no	3	2.654e-06	104.51	0	0	0	16533000	0	0	0	0	0	404	1261	8093	11931	11931	728		1	0	0	0	8058600	0	0	0	0	0
1129	QGGVNATQVLIQHLR	GCQADVWALQLQLYRQGGVNATQVLIQHLR	QGGVNATQVLIQHLRGLQKGRSTERNVSVE	R	Q	G	L	R	G	15	0	1632.91	B2RC09;Q13790	B2RC09	114	128	APOF	Apolipoprotein F	yes	no	2;3	0.00083184	87.618	0	0	0	3962000	0	9821400	40411000	0	83402000	333	1263	8095;8096;8097;8098;8099;8100	11935;11936;11937;11938;11939;11940;11941	11940	613		7	0	0	0	1931200	0	8452000	5220700	0	9051300
1130	QGLNNAVALDFDYR	LRKLNLDGSNYTLLKQGLNNAVALDFDYRE	KQGLNNAVALDFDYREQMIYWTDVTTQGSM	K	Q	G	Y	R	E	14	0	1594.77	Q07954;Q59FG2	Q07954	3054	3067	LRP1	Prolow-density lipoprotein receptor-related protein 1;Low-density lipoprotein receptor-related protein 1 85 kDa subunit;Low-density lipoprotein receptor-related protein 1 515 kDa subunit;Low-density lipoprotein receptor-related protein 1 intracellular domain	yes	no	2	0.0024766	96.64	0	0	0	0	0	0	0	0	0	575	1264	8101	11942	11942	1077		1	0	0	0	0	0	0	0	0	0
1131	QGNNHTCTWK	LALIQLEREFQRCCRQGNNHTCTWKAWEDT	QRCCRQGNNHTCTWKAWEDTLDKYCDREYA	R	Q	G	W	K	A	10	0	1244.54	Q16610;A0A140VJI7;C8CHS3	Q16610	351	360	ECM1	Extracellular matrix protein 1	yes	no	2;3	0.00094809	156.18	0	0	0	37928000	0	0	103250000	287260000	0	194	1265	8102;8103;8104	11943;11944;11945	11944	369		2	0	0	0	18487000	0	0	13340000	22450000	0
1133	QHSVLHLVPINATSK	RSRKRRAVLTQKQKKQHSVLHLVPINATSK	QHSVLHLVPINATSKDDSDVTEVMWQPALR	K	Q	H	S	K	D	15	0	1642.92	A0A0A6YY99;Q6U6I7;C9JF68;A0A0U5EM56;Q8NFH7;Q6FGR7;Q6FGN4;O75888	A0A0A6YY99	194	208	TNFSF12-TNFSF13;TNFSF13	Tumor necrosis factor ligand superfamily member 13	yes	no	2;3;4	8.2281e-20	147.07	153120000	134700000	40482000	23675000	41178000	39665000	0	113960000	0	158	1267	8106;8107;8108;8109;8110;8111;8112;8113;8114;8115;8116;8117	11947;11948;11949;11950;11951;11952;11953;11954;11955;11956;11957;11958;11959;11960;11961;11962	11960	319		15	153120000	113800000	43405000	11540000	50188000	34135000	0	8906300	0
1135	QINVSTDDSEVK	QAEVLAEFERRKRARQINVSTDDSEVKACL	RARQINVSTDDSEVKACLRALGEPITLFGE	R	Q	I	V	K	A	12	0	1333.64	Q6IAP9;Q5T1M7;B2R7V4;Q59EL4;O43172	Q6IAP9	97	108	PRPF4	U4/U6 small nuclear ribonucleoprotein Prp4	yes	no	2	0.0045311	96.948	0	0	0	0	0	0	0	0	0	325	1269	8119	11964	11964	598		1	0	0	0	0	0	0	0	0	0
1136	QKYELRVDLEDFENNTAYAK	EYWLGLQNMHLLTLKQKYELRVDLEDFENN	RVDLEDFENNTAYAKYADFSISPNAVSAEE	K	Q	K	A	K	Y	20	2	2445.18	K7ES70;A0A024QZ34;P55083	K7ES70	149	168	MFAP4	Microfibril-associated glycoprotein 4	yes	no	3	1.3607e-08	106.67	0	0	0	0	0	0	0	0	0	7	1270	8120	11965	11965	8;9		1	0	0	0	0	0	0	0	0	0
1139	QLINALQINNTAVGHALVLPAGR	DAGITPLFLTRQEDRQLINALQINNTAVGH	NNTAVGHALVLPAGRDLTDFLENVLTCHVC	R	Q	L	G	R	D	23	0	2382.35	D9ZGF2;P12111;E7ENL6;B7ZW00;Q59F25;Q8N4Z1	D9ZGF2	2550	2572	COL6A3	Collagen alpha-3(VI) chain	yes	no	2;3	6.7632e-214	299.17	44291000	53154000	18867000	652550000	394180000	397120000	2135900000	2117000000	2529500000	468	1274;1275	8125;8126;8127;8128;8129;8130;8131;8132;8133;8134;8135;8136;8137	11970;11971;11972;11973;11974;11975;11976;11977;11978;11979;11980;11981;11982;11983;11984;11985;11986;11987;11988;11989;11990	11982	826;827;828		19	44291000	44905000	20229000	318070000	480420000	341750000	275940000	165450000	274520000
1141	QLVHSFAEGQDQGSAYANR	PWEHCGSASQLTDTKQLVHSFAEGQDQGSA	SFAEGQDQGSAYANRTALFPDLLAQGNASL	K	Q	L	N	R	T	19	0	2076.96	B4DK26;A8K6Q6;Q5ZPR3;H0YLT8;H0YN85;H0YK40;H0YK59;B4DPW3;H3BM68	B4DK26	20	38	CD276	CD276 antigen	yes	no	3	3.2829e-65	228.32	0	0	0	67571000	40589000	42183000	0	0	0	302	1277	8146;8147;8148;8149	12005;12006;12007;12008;12009	12005	561		5	0	0	0	32936000	49470000	36301000	0	0	0
1143	QNESYLNFAR	NSDPYSVALSELGDRQNESYLNFARKRIKN	ELGDRQNESYLNFARKRIKNPEGGLYLAVT	R	Q	N	A	R	K	10	0	1240.58	B4DWE0;A0A0S2Z3S6;P04839;A0A0S2Z4A9	B4DWE0	116	125	CYBB	Cytochrome b-245 heavy chain	yes	no	2	3.9991e-07	196.95	0	0	0	33571000	0	8637900	0	0	0	183	1279	8152;8153	12012;12013	12012	351		2	0	0	0	16363000	0	7433500	0	0	0
1144	QNLTVTDR	DLTVTSAHDQSLVLKQNLTVTDRVIGGLLA	DQSLVLKQNLTVTDRVIGGLLAGQTYHVAV	K	Q	N	D	R	V	8	0	945.488	D9ZGF2;P12111;E7ENL6;B7ZW00;Q59F25;Q8N4Z1;Q6MZG6	D9ZGF2	3036	3043	COL6A3;DKFZp686D23123	Collagen alpha-3(VI) chain	yes	no	1;2	5.4591e-15	218.06	0	70718000	1066100000	0	0	788480000	855160000	0	96140000	468	1280	8154;8155;8156;8157;8158;8159	12014;12015;12016;12017;12018;12019	12018	829		5	0	59743000	1143100000	0	0	678550000	110480000	0	10434000
1145	QNQCFYNSSYLNVQR	NKTEDTIFLREYQTRQNQCFYNSSYLNVQR	QNQCFYNSSYLNVQRENGTVSRYEGGREHV	R	Q	N	Q	R	E	15	0	1919.86	P19652	P19652	87	101	ORM2	Alpha-1-acid glycoprotein 2	yes	yes	2;3	1.5766e-254	326.69	0	227310000	109490000	293150000	48501000	105600000	2110900000	6103600000	3067900000	549	1281;1282	8160;8161;8162;8163;8164;8165;8166;8167;8168;8169;8170;8171	12020;12021;12022;12023;12024;12025;12026;12027;12028;12029;12030;12031;12032;12033;12034	12021	989;990		14	0	192030000	117390000	142890000	59113000	90875000	272710000	477010000	332950000
1146	QNSTMFSLTPENSWTPK	SYMVVSRGQLVAVGKQNSTMFSLTPENSWT	STMFSLTPENSWTPKACVIVYYIEDDGEII	K	Q	N	P	K	A	17	0	1966.91	Q6YHK3	Q6YHK3	512	528	CD109	CD109 antigen	yes	yes	2	7.585e-190	307.15	0	0	0	46386000	0	0	200550000	525310000	202950000	619	1283	8172;8173;8174;8175	12035;12036;12037;12038;12039;12040	12037	1162		6	0	0	0	22610000	0	0	25909000	41054000	22025000
1147	QNVTEFPIIK	LTRINCADWSDVCTKQNVTEFPIIKMYKKG	DVCTKQNVTEFPIIKMYKKGENPVSYAGML	K	Q	N	I	K	M	10	0	1187.65	H0YJI6;B7ZME4;Q9P2K2	H0YJI6	20	29	TXNDC16	Thioredoxin domain-containing protein 16	yes	no	2	0.014428	88.177	0	0	3457600	0	0	0	0	0	0	436	1284	8176;8177	12041;12042	12042	777		2	0	0	3707200	0	0	0	0	0	0
1148	QPQPNVSELVVGPLPHPSYMR	PPPAREALAIVFFGRQPQPNVSELVVGPLP	SELVVGPLPHPSYMRDVTVERHGGPLPYHR	R	Q	P	M	R	D	21	0	2344.2	Q16853	Q16853	133	153	AOC3	Membrane primary amine oxidase	yes	yes	3	0.0040737	66.467	0	0	0	5892500	0	0	0	0	80796000	587	1285	8178;8179;8180	12043;12044;12045	12045	1101		3	0	0	0	2872200	0	0	0	0	8768500
1149	QPTVPASGEELENITDFSSSPTR	RPTGTPLERIETDIKQPTVPASGEELENIT	EELENITDFSSSPTRETDPLGKPRFKGPHV	K	Q	P	T	R	E	23	0	2461.16	A0A1S5UZ16;D3YTG3;Q7Z7G0;B4DSV9;H0Y897;H7C556	A0A1S5UZ16	791	813	ABI3BP	Target of Nesh-SH3	yes	no	2	3.3741e-39	174.59	0	0	0	0	0	0	0	50344000	0	214	1286	8181	12046	12046	401		1	0	0	0	0	0	0	0	3934500	0
1150	QPVSPVIHPPVSYNDTAPR	VAVVAGGLGRQLLQKQPVSPVIHPPVSYND	PVIHPPVSYNDTAPRILFWAQNFSVAYKDQ	K	Q	P	P	R	I	19	0	2073.06	A6NLC6;A0A0C4DGX8;Q8NF19;B3KR70;A0A384MQW4;Q15904	A6NLC6	178	196	ATP6AP1;FLJ00383	V-type proton ATPase subunit S1	yes	no	3	2.2638e-05	108.18	0	0	0	10670000	13419000	10658000	73811000	180200000	47113000	166	1287	8182;8183;8184;8185;8186;8187	12047;12048;12049;12050;12051;12052;12053;12054;12055;12056;12057;12058	12054	327		12	0	0	0	5201000	16355000	9172200	9535700	14083000	5113000
1151	QQQHLFGSNVTDCSGNFCLFR	VTRKDKEACVHKILRQQQHLFGSNVTDCSG	GSNVTDCSGNFCLFRSETKDLLFRDDTVCL	R	Q	Q	F	R	S	21	0	2514.12	B4DHZ6;B4DI57;B4E1B2;Q53H26;Q06AH7;P02787;A0A0K0K1H8	B4DHZ6	348	368	TF	Serotransferrin	yes	no	2;3	0	348.73	91445000	360980000	142460000	392130000	0	232690000	2417900000	4300100000	2572600000	369	1288	8188;8189;8190;8191;8192;8193;8194;8195;8196;8197;8198	12059;12060;12061;12062;12063;12064;12065;12066;12067;12068;12069;12070;12071;12072;12073;12074;12075;12076;12077;12078	12061	670		19	91445000	304960000	152740000	191130000	0	200240000	312370000	336060000	279190000
1152	QSGDVTCNCTDGR	NKCSRCLEGACVVNKQSGDVTCNCTDGRVA	NKQSGDVTCNCTDGRVAPSCLTCVGHCSNG	K	Q	S	G	R	V	13	0	1468.57	Q07954;Q59FG2	Q07954	4357	4369	LRP1	Prolow-density lipoprotein receptor-related protein 1;Low-density lipoprotein receptor-related protein 1 85 kDa subunit;Low-density lipoprotein receptor-related protein 1 515 kDa subunit;Low-density lipoprotein receptor-related protein 1 intracellular domain	yes	no	2	1.5503e-158	238.92	0	18772000	14344000	110030000	27882000	12279000	477600000	61049000	0	575	1289	8199;8200;8201;8202;8203;8204;8205;8206;8207	12079;12080;12081;12082;12083;12084;12085;12086;12087;12088;12089;12090;12091	12091	1078		13	0	15859000	15380000	53634000	33982000	10567000	61701000	4771100	0
1153	QSGVNATLPEENQPVVFNHVYNIK	ATEGGVLKKVIRHKRQSGVNATLPEENQPV	EENQPVVFNHVYNIKLPVGSQCSVDLESAS	R	Q	S	I	K	L	24	0	2696.36	P24821;E9PC84;J3QSU6;A0A024R884;Q4LE33;A7MBN2;F5H7V9;D3YHM4;B4E1W8;F5H5D6	P24821	34	57	TNC;TNC variant protein	Tenascin	yes	no	3	7.365e-67	220.65	0	0	0	308390000	15621000	24653000	560800000	582750000	585310000	553	1290	8208;8209;8210;8211;8212;8213;8214;8215;8216;8217	12092;12093;12094;12095;12096;12097;12098;12099;12100;12101;12102;12103;12104;12105;12106;12107	12099	1011		16	0	0	0	150320000	19039000	21216000	72451000	45543000	63521000
1154	QSVPAHFVALNGSK	QGSTCRDHENELLNKQSVPAHFVALNGSKL	KQSVPAHFVALNGSKLNINLKMGVEWTSCA	K	Q	S	S	K	L	14	0	1453.77	E7ETN3;B4E1Z4;P06681;A0A0G2JL69;Q53GZ8;A0A1U9X8X9;A0A1U9X8X3;A0A1U9X8W4;Q53HP3;Q5JP69;B4DV48;Q7Z685;E9PDZ0;B4DQI1;A0A0G2JIE7;H0Y3H6	E7ETN3	382	395	C2;DKFZp779M0311	Complement C2;Complement C2b fragment;Complement C2a fragment	yes	no	3	5.5391e-05	123.72	0	22400000	0	39100000	19289000	15103000	152640000	792040000	319340000	471	1291	8218;8219;8220;8221;8222;8223;8224	12108;12109;12110;12111;12112;12113;12114	12114	840		7	0	18924000	0	19058000	23509000	12997000	19720000	61900000	34657000
1157	QTNDLSFIHLTK	TEFQKQDLGEPEEDRQTNDLSFIHLTKHRE	EDRQTNDLSFIHLTKHRELKHSGSWPGHRY	R	Q	T	T	K	H	12	0	1415.74	Q9P266	Q9P266	660	671	KIAA1462	Junctional protein associated with coronary artery disease	yes	yes	2	0.007146	88.136	0	515270000	79434000	0	0	129180000	427640000	0	0	664	1294	8232;8233;8234;8235	12124;12125;12126;12127;12128	12128	1240		3	0	435310000	85170000	0	0	111170000	55247000	0	0
1158	QTPEYQNESSR	LGPCPRYEQLQNETRQTPEYQNESSRNAQF	NETRQTPEYQNESSRNAQFLDMVANETGLT	R	Q	T	S	R	N	11	0	1337.58	B7Z7D2;E9PQY3;B7Z552;B7Z6L8;P11117	B7Z7D2	139	149	ACP2	Lysosomal acid phosphatase	yes	no	2	4.6785e-05	129.85	0	0	0	11912000	0	0	47959000	56311000	32581000	423	1295	8236;8237;8238;8239	12129;12130;12131;12132;12133	12131	757		5	0	0	0	5806300	0	0	6195900	4400800	3535900
1159	QTQVGIVQYGENVTHEFNLNK	AFLNDLLERMDIGPKQTQVGIVQYGENVTH	VQYGENVTHEFNLNKYSSTEEVLVAAKKIV	K	Q	T	N	K	Y	21	0	2417.2	B4DTY8;P56199	B4DTY8	206	226	ITGA1	Integrin alpha-1	yes	no	3	1.7428e-91	249.14	0	0	0	76952000	0	28269000	211860000	371160000	0	391	1296	8240;8241;8242;8243	12134;12135;12136;12137;12138;12139;12140;12141;12142	12139	707		9	0	0	0	37508000	0	24328000	27370000	29007000	0
1160	QVALQTFGNQTTIIPAGGAGYK	TPRIVVSRSHSGMVKQVALQTFGNQTTIIP	GNQTTIIPAGGAGYKVLALLDVPDKSQEKA	K	Q	V	Y	K	V	22	0	2234.17	A0A024R7W0;Q9NX62	A0A024R7W0	251	272	IMPAD1	Inositol monophosphatase 3	yes	no	2	6.311e-170	287.54	0	0	7223800	47896000	0	0	0	559800000	0	62	1297	8244;8245;8246;8247;8248;8249	12143;12144;12145;12146;12147;12148;12149	12147	102		7	0	0	7745400	23346000	0	0	0	43750000	0
1161	QVASHAALLQQLNGTVAEVQGQLAEGTGSSLQGEITLLK	AEVKAWQSRSEALLRQVASHAALLQQLNGT	EGTGSSLQGEITLLKVNLNSVSKSLTGLSD	R	Q	V	L	K	V	39	0	3959.1	Q9NT22	Q9NT22	550	588	EMILIN3	EMILIN-3	yes	yes	3	0.00056852	45.179	0	0	0	0	0	0	0	0	0	663	1298	8250	12150	12150	1238		1	0	0	0	0	0	0	0	0	0
1163	QVHFFVNASDVDNVK	VLWQPVTADLIVKKKQVHFFVNASDVDNVK	QVHFFVNASDVDNVKAHLNVSGIPCSVLLA	K	Q	V	V	K	A	15	0	1717.84	A0A087WSY5;Q96IY4	A0A087WSY5	67	81	CPB2	Carboxypeptidase B2	yes	no	2;3	7.0073e-60	243.11	0	0	0	60697000	0	0	0	449220000	0	116	1300	8255;8256;8257;8258;8259;8260;8261;8262;8263	12155;12156;12157;12158;12159;12160;12161;12162;12163;12164	12159	242		9	0	0	0	29585000	0	0	0	35108000	0
1165	QVIQNVTHK	PAYVPRKLIPITIIKQVIQNVTHKDSAKSP	PITIIKQVIQNVTHKDSAKSPEKAPLGGVI	K	Q	V	H	K	D	9	0	1065.59	A0A1S5UZ16;D3YTG3;Q7Z7G0;Q9H717;Q5JPC9;H7C4X4;H0YEA0	A0A1S5UZ16	255	263	ABI3BP;DKFZp667H216	Target of Nesh-SH3	yes	no	2;3	7.8754e-27	229.33	253370000	0	277260000	2021500000	587890000	440040000	3879100000	3639200000	4619200000	214	1302	8265;8266;8267;8268;8269;8270;8271;8272;8273;8274;8275;8276;8277;8278;8279;8280	12166;12167;12168;12169;12170;12171;12172;12173;12174;12175;12176;12177;12178;12179;12180;12181;12182;12183;12184;12185	12176	402		16	253370000	0	297280000	985330000	716530000	378690000	501150000	284410000	501310000
1166	QVIQNVTHKDSAK	PAYVPRKLIPITIIKQVIQNVTHKDSAKSP	IKQVIQNVTHKDSAKSPEKAPLGGVILVHL	K	Q	V	A	K	S	13	1	1466.78	A0A1S5UZ16;D3YTG3;Q7Z7G0;Q9H717;Q5JPC9;H7C4X4;H0YEA0	A0A1S5UZ16	255	267	ABI3BP;DKFZp667H216	Target of Nesh-SH3	yes	no	3	0.045139	64.394	0	0	7729600	0	0	0	0	0	0	214	1303	8281	12186	12186	402		1	0	0	8287700	0	0	0	0	0	0
1167	QVLSYGQNLSFSFR	YFPRYFIAPAKFLGKQVLSYGQNLSFSFRV	KQVLSYGQNLSFSFRVDRRDTRLSAEDLVL	K	Q	V	F	R	V	14	0	1644.83	A0A024R972;P11047	A0A024R972	533	546	LAMC1	Laminin subunit gamma-1	yes	no	2	2.6851e-09	144.1	0	0	0	24736000	0	0	0	0	0	81	1304	8282	12187;12188	12187	162		2	0	0	0	12057000	0	0	0	0	0
1168	QVQEQCPNITR	DFQHHNYKAMRKLMKQVQEQCPNITRIYSI	KLMKQVQEQCPNITRIYSIGKSYQGLKLYV	K	Q	V	T	R	I	11	0	1371.66	Q8N2E1;Q96SM3;Q8N2F1;B4DZY4	Q8N2E1	311	321	CPXM1	Probable carboxypeptidase X1	yes	no	2	5.744e-18	208.11	0	0	0	10165000	0	0	74757000	143080000	0	636	1305	8283;8284;8285	12189;12190;12191	12191	1194		3	0	0	0	4954900	0	0	9657900	11182000	0
1169	QVTQEMLNHTIAIR	DGKFTTVADITVHIRQVTQEMLNHTIAIRF	RQVTQEMLNHTIAIRFANLTPEEFVGDYWR	R	Q	V	I	R	F	14	0	1652.87	A0A087WVP1;Q14517	A0A087WVP1	3635	3648	FAT1	Protocadherin Fat 1;Protocadherin Fat 1, nuclear form	yes	no	3	0.0022357	83.729	0	0	0	0	0	0	0	0	0	130	1306	8286	12192	12192	252		1	0	0	0	0	0	0	0	0	0
1170	QYLSYETLYANGSR	QCHKGTPLPTYEEAKQYLSYETLYANGSRT	KQYLSYETLYANGSRTETQVGIYILSSSGD	K	Q	Y	S	R	T	14	0	1663.78	O95084;B3KQQ9;E9PRR2	O95084	83	96	PRSS23	Serine protease 23	yes	no	2	0.024774	69.451	0	0	0	0	0	0	0	0	0	349	1307	8287	12193	12193	637		1	0	0	0	0	0	0	0	0	0
1171	QYNSTGDYR	EIKNSFKNNYEKALKQYNSTGDYRSHAVDK	YEKALKQYNSTGDYRSHAVDKIQNTLHCCG	K	Q	Y	Y	R	S	9	0	1102.47	A0A087WYV6;A0A087WZU5;A0A024RCI0;B4DRB0;B4DUZ1;B3KQJ7;Q59ED5;O43657	A0A087WYV6	44	52	TSPAN6	Tetraspanin;Tetraspanin-6	yes	no	2	0.001887	139.74	0	63713000	40798000	83699000	19023000	0	0	0	0	101	1308	8288;8289;8290;8291	12194;12195;12196;12197;12198;12199	12198	223		6	0	53826000	43743000	40797000	23185000	0	0	0	0
1173	RDPGAAVPGAANASAQQPR	FSLLSLGSQYQPQRRRDPGAAVPGAANASA	AAVPGAANASAQQPRTPILLIRDNRTAAAR	R	R	D	P	R	T	19	1	1832.92	Q96PQ9;D0PNI2;P28300	Q96PQ9	70	88	LOX	Protein-lysine 6-oxidase	yes	no	3	3.0482e-25	157.85	12509000	20344000	26176000	21169000	38407000	29531000	141250000	222450000	265150000	457	1310	8295;8296;8297;8298;8299;8300;8301;8302;8303	12203;12204;12205;12206;12207;12208;12209;12210;12211;12212;12213;12214	12211	807		11	12509000	17187000	28066000	10318000	46810000	25414000	18248000	17385000	28776000
1174	RGTFTDCALANMTEQIR	RASFIKNLQGISSFRRGTFTDCALANMTEQ	TFTDCALANMTEQIRQDRSKGTVHFAVVIT	R	R	G	I	R	Q	17	1	1982.93	A0A384MDP3;P12110;C9JH44	A0A384MDP3	130	146	COL6A2	Collagen alpha-2(VI) chain	yes	no	3	0.02445	58.073	0	0	0	6104300	0	0	0	0	0	243	1311	8304	12215	12215	450		1	0	0	0	2975400	0	0	0	0	0
1180	RLPEMAQPVDPAHNVSR	HKHLDHEVAKPARRKRLPEMAQPVDPAHNV	PEMAQPVDPAHNVSRLHRLPRDCQELFQVG	K	R	L	S	R	L	17	1	1915.97	Q9BY76	Q9BY76	164	180	ANGPTL4	Angiopoietin-related protein 4	yes	yes	3	0.0087044	68.525	0	13508000	8171500	0	0	0	0	0	0	658	1318	8350;8351	12293;12294;12295	12293	1224		3	0	11412000	8761500	0	0	0	0	0	0
1182	RNESHLIDFR	SGLGGGGVMLVHDIRRNESHLIDFRESAPG	VHDIRRNESHLIDFRESAPGALREETLQRS	R	R	N	F	R	E	10	1	1285.65	B4DRZ0;A0PJJ9;A4FU32;A5D8W8;Q9UJ14	B4DRZ0	197	206	GGT7	Gamma-glutamyltransferase 7;Gamma-glutamyltransferase 7 heavy chain;Gamma-glutamyltransferase 7 light chain	yes	no	3	0.021864	61.435	0	0	0	0	0	0	0	0	0	265	1320	8353	12297	12297	504		1	0	0	0	0	0	0	0	0	0
1183	RNFTAADWGQSR	LEPRLSIIATDHTYRRNFTAADWGQSRDAE	TYRRNFTAADWGQSRDAEEAISQTIDTIVD	R	R	N	S	R	D	12	1	1407.66	A0A087X0S5;A0A384P5H7;P12109;B4DRR8;D3DSM7;B4DQV1	A0A087X0S5	211	222	COL6A1	Collagen alpha-1(VI) chain	yes	no	2;3	1.0667e-178	307.97	64772000	30663000	57180000	2050600000	0	1358500000	11494000000	11387000000	10568000000	141	1321	8354;8355;8356;8357;8358;8359;8360;8361;8362;8363;8364;8365	12298;12299;12300;12301;12302;12303;12304;12305;12306;12307;12308;12309;12310;12311;12312;12313;12314;12315	12315	276		17	64772000	25905000	61308000	999530000	0	1169000000	1484900000	889950000	1146900000
1184	RNGTSSGLGPSCSDAPTTPIK	LSCGVPGPQGKALQKRNGTSSGLGPSCSDA	GLGPSCSDAPTTPIKQKARFKIRDAKCHLR	K	R	N	I	K	Q	21	1	2102.01	Q8IWY4	Q8IWY4	465	485	SCUBE1	Signal peptide, CUB and EGF-like domain-containing protein 1	yes	yes	3	0.0062695	70.453	0	0	0	3425700	0	0	0	0	0	634	1322	8366	12316	12316	1190		1	0	0	0	1669800	0	0	0	0	0
1185	RNLSDLFQWAVSR	FLCDMDVFDAYLPWRRNLSDLFQWAVSRAL	WRRNLSDLFQWAVSRALCSPPACSAFPRGA	R	R	N	S	R	A	13	1	1590.83	A0A1I9LHJ2;A0A1I9LHJ1;A0A1I9LHJ0;Q9GZX3	A0A1I9LHJ2	115	127	CHST6	Carbohydrate sulfotransferase 6	yes	no	2	0.0093071	89.189	0	0	0	0	0	0	0	0	0	213	1323	8367	12317	12317	397		1	0	0	0	0	0	0	0	0	0
1186	RNMTQGR	SPSSSSTYCNQMMRRRNMTQGRCKPVNTFV	YCNQMMRRRNMTQGRCKPVNTFVHEPLVDV	R	R	N	G	R	C	7	1	861.424	G3V357;W0UV93;P07998	G3V357	21	27	RNASE1;RAC1	Ribonuclease pancreatic	yes	no	2	2.7082e-06	215.07	5214500	0	0	0	0	0	0	0	88917000	483	1324	8368;8369	12318;12319	12319	852		1	5214500	0	0	0	0	0	0	0	9649800
1187	RNPPMGGNVVIFDTVITNQEEPYQNHSGR	GNIKDQPRPAFSAIRRNPPMGGNVVIFDTV	VITNQEEPYQNHSGRFVCTVPGYYYFTFQV	R	R	N	G	R	F	29	1	3268.57	X6RLJ0;A0A024RAG6;P02745	X6RLJ0	122	150	C1QA	Complement C1q subcomponent subunit A	yes	no	3;4	6.3847e-119	242.94	0	0	33069000	595900000	11398000	85789000	858290000	455470000	318110000	91	1325;1326	8370;8371;8372;8373;8374;8375;8376;8377;8378;8379;8380;8381;8382;8383;8384	12320;12321;12322;12323;12324;12325;12326;12327;12328;12329;12330;12331;12332;12333;12334;12335;12336;12337;12338;12339;12340;12341;12342;12343;12344;12345;12346	12335	189;190	14	25	0	0	35457000	290460000	13892000	73827000	110880000	35596000	34523000
1188	RPASNVSASIQR	VVPQLLDQLRTVEQKRPASNVSASIQRIRE	EQKRPASNVSASIQRIRELIAQTRSVASKI	K	R	P	Q	R	I	12	0	1284.69	B7Z938;Q5D044;H0UI49;A0A0A0MTC7;A0A0A0MQS9;Q16363	B7Z938	806	817	LAMA4	Laminin subunit alpha-4	yes	no	2;3	4.625e-06	160.86	0	0	0	60335000	22749000	77052000	131610000	289390000	199720000	148	1327	8385;8386;8387;8388;8389;8390;8391;8392	12347;12348;12349;12350;12351;12352;12353;12354;12355	12352	302		8	0	0	0	29409000	27726000	66308000	17002000	22617000	21675000
1191	RPPLAELAALNLSGSR	TGNQLAVLPAGAFARRPPLAELAALNLSGS	PPLAELAALNLSGSRLDEVRAGAFEHLPSL	R	R	P	S	R	L	16	0	1663.94	Q13641	Q13641	114	129	TPBG	Trophoblast glycoprotein	yes	yes	3	0.00012539	101.04	0	0	0	0	0	0	111970000	130130000	128110000	580	1330	8396;8397;8398;8399;8400	12359;12360;12361;12362;12363	12359	1091		5	0	0	0	0	0	0	14466000	10170000	13903000
1193	RPQEFVNR	TYRVVAHSSVFRVLRRPQEFVNRTPETVFI	SVFRVLRRPQEFVNRTPETVFIFWGPPSKM	R	R	P	N	R	T	8	0	1044.55	X6RH99;A0A0S2Z653;A0A024R8C6;A0A0S2Z5G9;A0A2R8YFX0;Q969X2	X6RH99	133	140	ST6GALNAC6	Alpha-N-acetylgalactosaminide alpha-2,6-sialyltransferase 6	yes	no	2	0.023324	89.355	0	16708000	10140000	0	0	0	0	0	0	68	1332	8403;8404	12366;12367	12366	115		2	0	14115000	10872000	0	0	0	0	0	0
1194	RPWGNLTAELSR	EEESPPRPSLSQPPRRPWGNLTAELSRFRG	PPRRPWGNLTAELSRFRGTVQDLERHLRAH	R	R	P	S	R	F	12	0	1398.74	A0A3B3ISX9;A0A087WWA5	A0A3B3ISX9	984	995	TNXB		yes	no	2;3	7.516e-09	188.91	0	0	0	70919000	0	0	818950000	0	0	259	1333	8405;8406;8407	12368;12369;12370	12368	495		3	0	0	0	34568000	0	0	105800000	0	0
1195	SAEFFNYTVR	TVATAETEGYLRFLRSAEFFNYTVRTLGLG	LRFLRSAEFFNYTVRTLGLGEEWRGGDVAR	R	S	A	V	R	T	10	0	1232.58	B3KQQ3;O60568;C9JIX5;C9JU11;B4DMP0	B3KQQ3	58	67	PLOD3	Procollagen-lysine,2-oxoglutarate 5-dioxygenase 3	yes	no	2	0.00085793	159.58	0	6705300	6554500	27772000	0	0	47886000	203310000	50029000	348	1334	8408;8409;8410;8411;8412;8413	12371;12372;12373;12374;12375;12376;12377;12378	12376	635		8	0	5664700	7027800	13537000	0	0	6186400	15889000	5429400
1196	SAEGTFFINK	GALRGLETFSQLVWKSAEGTFFINKTEIED	QLVWKSAEGTFFINKTEIEDFPPAGVLLHP	K	S	A	N	K	T	10	0	1112.55	A0A0S2Z3X0;H3BU85;A0A0S2Z3L7;H3BTD4;Q9BVJ8;H3BS10;A0A0S2Z3W3;H3BP20;B4DVA7;P06865	A0A0S2Z3X0	149	158	HEXA	Beta-hexosaminidase;Beta-hexosaminidase subunit alpha	yes	no	2	0.00028021	166.16	82169000	40279000	29413000	132040000	75377000	79899000	399380000	666000000	340720000	181	1335	8414;8415;8416;8417;8418;8419;8420;8421;8422	12379;12380;12381;12382;12383;12384;12385;12386;12387;12388;12389;12390;12391;12392;12393;12394	12385	348		16	82169000	34028000	31536000	64358000	91870000	68759000	51596000	52049000	36977000
1200	SANSTLAQALHWTR	LRQFGLQEKSPPRTRSANSTLAQALHWTRS	RSANSTLAQALHWTRSQLSPLEAPALLWGL	R	S	A	T	R	S	14	0	1554.79	Q9BU23	Q9BU23	614	627	LMF2	Lipase maturation factor 2	yes	yes	2;3	1.0367e-84	235.31	0	0	0	22365000	4373500	0	49165000	382690000	0	656	1339	8435;8436;8437;8438;8439	12408;12409;12410;12411;12412;12413	12413	1221		5	0	0	0	10901000	5330500	0	6351600	29908000	0
1201	SAQNLASR	QNINFSESIQNYTDKSAQNLASRNLKHERF	IQNYTDKSAQNLASRNLKHERFQSLSFPHT	K	S	A	S	R	N	8	0	845.436	B7ZKN7;B7Z2X2;H0YNU5;A0A3B3IT82;B2RAN0;P54132	B7ZKN7	255	262	BLM	Bloom syndrome protein	yes	no	2	0.0033773	148.04	0	0	0	96448000	0	0	194660000	698870000	351060000	261	1340	8440;8441;8442;8443	12414;12415;12416;12417;12418	12415	499		5	0	0	0	47011000	0	0	25149000	54618000	38099000
1204	SCGECIQAGPNCGWCTNSTFLQEGMPTSAR	FAQTDENRCLKANAKSCGECIQAGPNCGWC	TNSTFLQEGMPTSARCDDLEALKKKGCPPD	K	S	C	A	R	C	30	0	3375.38	P05556;Q5T3E5;E9PQJ2;E7ERX5;Q5T3E6;E9PLR6;E7EQW5	P05556	34	63	ITGB1	Integrin beta-1;Integrin beta	yes	no	3	4.3188e-08	99.34	0	0	0	9224600	0	0	0	0	0	534	1343	8446	12421	12421	960		1	0	0	0	4496400	0	0	0	0	0
1205	SCHLCNASDPK	ARYCVVSERGEERLRSCHLCNASDPKKAHP	ERLRSCHLCNASDPKKAHPPAFLTDLNNPH	R	S	C	P	K	K	11	0	1287.53	O95631	O95631	90	100	NTN1	Netrin-1	yes	yes	2;3	3.6094e-05	146.17	0	20519000	0	22984000	0	0	213390000	137260000	156990000	519	1344	8447;8448;8449;8450;8451;8452;8453;8454	12422;12423;12424;12425;12426;12427;12428;12429;12430;12431	12426	925		7	0	17335000	0	11203000	0	0	27568000	10727000	17037000
1206	SCHTGINR	RRSSHVTIDTLKGVKSCHTGINRTVGWNVP	DTLKGVKSCHTGINRTVGWNVPVGYLVESG	K	S	C	N	R	T	8	0	943.429	C9JVN1;Q53XS6;P08582	C9JVN1	129	136	MFI2	Melanotransferrin	yes	no	2	0.0034813	135.77	0	0	0	0	0	22364000	66644000000	0	0	450	1345	8455;8456	12432;12433	12433	795		2	0	0	0	0	0	19246000	8609800000	0	0
1207	SCINESAIDSR	TEDIVAVQKAKALYRSCINESAIDSRGGEP	ALYRSCINESAIDSRGGEPLLKLLPDIYGW	R	S	C	S	R	G	11	0	1250.56	B7ZKY6;P08473;C9J9X7;C9JR96	B7ZKY6	142	152	MME	Neprilysin	yes	no	2	0.0017782	119.22	0	0	0	0	0	0	0	0	0	435	1346	8457	12434	12434	776		1	0	0	0	0	0	0	0	0	0
1208	SCPACPGSNITIR	DPRIKNQADCIPFFRSCPACPGSNITIRNQ	FRSCPACPGSNITIRNQINALTSFVDASMV	R	S	C	I	R	N	13	0	1431.66	P05164	P05164	315	327	MPO	Myeloperoxidase;Myeloperoxidase;89 kDa myeloperoxidase;84 kDa myeloperoxidase;Myeloperoxidase light chain;Myeloperoxidase heavy chain	yes	yes	2	7.1146e-09	164.65	15707000	14008000	5159500	42505000	0	36904000	0	440980000	730940000	531	1347	8458;8459;8460;8461;8462;8463;8464	12435;12436;12437;12438;12439;12440;12441;12442;12443;12444	12439	949		10	15707000	11834000	5532000	20718000	0	31759000	0	34463000	79326000
1209	SCQHNGTMYQHGEIFSAHELFPSR	CVEPHTPSGLRAPPKSCQHNGTMYQHGEIF	QHGEIFSAHELFPSRLPNQCVLCSCTEGQI	K	S	C	S	R	L	24	0	2832.25	Q6WN33;B4E311;Q6WN34	Q6WN33	110	133	CHL2;CHRDL2	Chordin-like protein 2	yes	no	4	2.5642e-45	189.94	42175000	0	0	0	0	0	0	0	80759000	409	1348;1349	8465;8466;8467	12445;12446;12447;12448	12446	736	78	4	42175000	0	0	0	0	0	0	0	8764400
1210	SCSHLHNK	DGCRPACLVNGQSVKSCSHLHNKTGWWFNE	VNGQSVKSCSHLHNKTGWWFNECGLANLNG	K	S	C	N	K	T	8	0	981.445	Q86XS5	Q86XS5	323	330	ANGPTL5	Angiopoietin-related protein 5	yes	yes	2	0.015673	106.36	0	2397800	0	0	2835500	0	0	33421000	0	628	1350	8468;8469;8470	12449;12450;12451	12449	1176		3	0	2025700	0	0	3455900	0	0	2611900	0
1211	SCVAVTSAQPQNMSR	PRAEEASHWLWSRSKSCVAVTSAQPQNMSR	SCVAVTSAQPQNMSRRAQGEVQLTVSPLPA	K	S	C	S	R	R	15	0	1634.75	O15031	O15031	517	531	PLXNB2	Plexin-B2	yes	yes	2	1.906e-104	207.88	0	0	0	0	0	0	0	0	0	504	1351	8471	12452	12452	888		1	0	0	0	0	0	0	0	0	0
1212	SDAVSHTGNYTCEVTELTR	VSQLLKGDASLKMDKSDAVSHTGNYTCEVT	SHTGNYTCEVTELTREGETIIELKYRVVSW	K	S	D	T	R	E	19	0	2138.95	A0A2R8Y484;A0A0A1TSG4;Q08722	A0A2R8Y484	58	76	CD47	Leukocyte surface antigen CD47	yes	no	2;3	0	383.07	119330000	201600000	99473000	400560000	13395000	158210000	2571500000	3395300000	1222000000	234	1352	8472;8473;8474;8475;8476;8477;8478;8479;8480;8481;8482;8483;8484;8485;8486	12453;12454;12455;12456;12457;12458;12459;12460;12461;12462;12463;12464;12465;12466;12467;12468;12469;12470;12471;12472;12473;12474;12475;12476;12477;12478;12479;12480	12476	430		28	119330000	170320000	106660000	195240000	16326000	136150000	332210000	265350000	132620000
1213	SDEPVCASDNATYASECAMK	RGRCSLCDELCPDSKSDEPVCASDNATYAS	CASDNATYASECAMKEAACSSGVLLEVKHS	K	S	D	M	K	E	20	0	2204.87	H0YAF9;H0YA75;Q6FHE1;A0A024QZU6;P19883	H0YAF9	64	83	FST	Follistatin	yes	no	2	6.8285e-19	147.56	0	0	0	19528000	0	0	0	0	0	13	1353	8487	12481	12481	18		1	0	0	0	9518500	0	0	0	0	0
1214	SDLSGVDVTMLNMLNRR	NTCSLGGPMTLLPGRSDLSGVDVTMLNMLN	LSGVDVTMLNMLNRRDSSASTISSAYLSSR	R	S	D	R	R	D	17	1	1919.96	B4DRK1;A0A2R8YGX0;A0A024RA92;P10071	B4DRK1	772	788	GLI3	Transcriptional activator GLI3;Transcriptional repressor GLI3R	yes	no	2;3	0.016716	68.536	0	0	0	0	0	0	35171000	66837000	188920000	87	1354	8488;8489;8490;8491	12482;12483;12484;12485	12483	176;177		4	0	0	0	0	0	0	4543800	5223500	20503000
1216	SDSGNYTCLVR	QIYQDGTLLIQKAQRSDSGNYTCLVRNSAG	KAQRSDSGNYTCLVRNSAGEDRKTVWIHVN	R	S	D	V	R	N	11	0	1270.56	Q9NR99	Q9NR99	2411	2421	MXRA5	Matrix-remodeling-associated protein 5	yes	yes	2	1.0036e-34	225.67	5871000	11822000	0	230900000	37503000	120860000	907370000	1379300000	873440000	662	1356	8493;8494;8495;8496;8497;8498;8499;8500;8501;8502;8503	12487;12488;12489;12490;12491;12492;12493;12494;12495;12496;12497;12498;12499;12500	12490	1233		13	5871000	9987300	0	112550000	45709000	104010000	117220000	107800000	94791000
1218	SEGTNSTLTLSPVSFENEHSYLCTVTCGHK	SWRTQIDSPLSGKVRSEGTNSTLTLSPVSF	ENEHSYLCTVTCGHKKLEKGIQVELY____	R	S	E	H	K	K	30	0	3354.51	F2YYR6;Q53FL7;P19320	F2YYR6	140	169	VCAM1	Vascular cell adhesion protein 1	yes	no	4	2.6621e-15	124.03	0	0	0	21879000	0	33629000	0	0	0	477	1358	8505;8506	12502;12503	12502	847		2	0	0	0	10665000	0	28940000	0	0	0
1219	SENASLVLSSSNQK	SYFSSLNLTIRGGLRSENASLVLSSSNQKR	RSENASLVLSSSNQKRELAIQISKDGLPGR	R	S	E	Q	K	R	14	0	1462.73	B4DTY8;P56199	B4DTY8	1111	1124	ITGA1	Integrin alpha-1	yes	no	2	1.1729e-10	186.36	0	0	0	26960000	18239000	28636000	0	0	0	391	1359	8507;8508;8509	12504;12505;12506	12504	708		3	0	0	0	13141000	22229000	24643000	0	0	0
1220	SFDDHFQHLLNDSER	DSSRVLQAMLATQLRSFDDHFQHLLNDSER	SFDDHFQHLLNDSERTLQATFPGAFGELYT	R	S	F	E	R	T	15	0	1858.82	C9J4Y6;H7BZE9;Q53EX3;H7C024;Q59GI7;H7C410;A0A024R4D5;A0A384NPH9;P35052	C9J4Y6	56	70	GPC1	Glypican-1;Secreted glypican-1	yes	no	3	3.9338e-05	122.31	0	6984800	6450800	23577000	0	0	0	0	0	36	1360	8510;8511;8512;8513	12507;12508;12509;12510	12510	61		4	0	5900800	6916500	11492000	0	0	0	0	0
1221	SFMVNWTHAPGNVEK	TGPPTELITSEVTARSFMVNWTHAPGNVEK	SFMVNWTHAPGNVEKYRVVYYPTRGGKPDE	R	S	F	E	K	Y	15	0	1715.81	Q05707;Q4G0W3;A8KAL5;H0YBB2;J3QT83	Q05707	368	382	COL14A1	Collagen alpha-1(XIV) chain	yes	no	2;3	3.4076e-179	306.21	0	40738000	49012000	3069700000	372550000	1036000000	3038000000	14590000000	2547900000	572	1361;1362	8514;8515;8516;8517;8518;8519;8520;8521;8522;8523;8524;8525;8526;8527;8528;8529;8530;8531;8532;8533;8534;8535;8536;8537;8538;8539;8540;8541;8542	12511;12512;12513;12514;12515;12516;12517;12518;12519;12520;12521;12522;12523;12524;12525;12526;12527;12528;12529;12530;12531;12532;12533;12534;12535;12536;12537;12538;12539;12540;12541;12542;12543;12544;12545;12546;12547;12548;12549	12526	1053	108	37	0	34415000	52551000	1496200000	454070000	891530000	392480000	1140300000	276510000
1222	SFSGVLDCGNCSR	CITEQTQYFFDNDSKSFSGVLDCGNCSRIF	SKSFSGVLDCGNCSRIFHGEKLMNTNLIFI	K	S	F	S	R	I	13	0	1457.6	Q9UIU0;P54289;Q9UDQ3;B7Z658	Q9UIU0	996	1008	CACNA2D1;WUGSC:H_DJ0560O14.1	Voltage-dependent calcium channel subunit alpha-2/delta-1;Voltage-dependent calcium channel subunit alpha-2-1;Voltage-dependent calcium channel subunit delta-1	yes	no	2	1.44e-08	164.33	0	0	3200600	21496000	0	0	0	0	0	564	1363	8543;8544	12550;12551	12551	1037		2	0	0	3431700	10478000	0	0	0	0	0
1223	SFTDLLLDDGQDNNTQIEEDTDHNYYISR	DTNRASVGQDSPEPRSFTDLLLDDGQDNNT	TQIEEDTDHNYYISRIYGPSDSASRDLWVN	R	S	F	S	R	I	29	0	3430.51	B4E367;Q6UX71	B4E367	77	105	PLXDC2	Plexin domain-containing protein 2	yes	no	3	2.6343e-200	284.9	0	0	0	0	0	0	93298000	259280000	0	410	1364	8545;8546;8547	12552;12553;12554;12555	12555	737		4	0	0	0	0	0	0	12053000	20263000	0
1225	SGVINLTEEVLWVK	RNYSKYQSVSLLDKKSGVINLTEEVLWVKV	KSGVINLTEEVLWVKVNINMNGYYIVHYAD	K	S	G	V	K	V	14	0	1585.87	B2RAK1;Q9UIQ6	B2RAK1	678	691	LNPEP	Leucyl-cystinyl aminopeptidase;Leucyl-cystinyl aminopeptidase, pregnancy serum form	yes	no	2	0.0032539	101.72	0	0	0	15934000	0	0	0	48815000	0	330	1366	8550;8551	12558;12559	12559	607		2	0	0	0	7766700	0	0	0	3815000	0
1228	SHTNTSHVMQYGNK	DLTKETLHKQYHLVKSHTNTSHVMQYGNKT	KSHTNTSHVMQYGNKTISTMKVMQFQGMKR	K	S	H	N	K	T	14	0	1602.72	B7Z4A4;B7Z4S8;Q6I9U9;Q53XC6;A8K669;Q99538	B7Z4A4	225	238	LGMN	Legumain	yes	no	3	1.8085e-09	171.26	0	0	0	56033000	21900000	36131000	56817000	218010000	135150000	299	1370;1371	8562;8563;8564;8565;8566;8567;8568;8569	12581;12582;12583;12584;12585;12586;12587;12588;12589;12590;12591;12592;12593;12594;12595;12596	12595	557;558	63	16	0	0	0	27312000	26692000	31093000	7340300	17038000	14667000
1229	SIINATDP	______________________________	______________________________	K	S	I	D	P	-	8	0	829.418	Q6LEP5;B4DNZ4;P35625	Q6LEP5	4	11	TIMP3	Metalloproteinase inhibitor 3	yes	no	1	0.021387	105.81	0	0	91081000	0	0	0	291110000	0	0	384	1372	8570;8571	12597;12598	12598	694		2	0	0	97657000	0	0	0	37609000	0	0
1230	SIQMTNQTFSTVENLKPNTSYEFQVKPK	EVISRENGSFSGKNKSIQMTNQTFSTVENL	NLKPNTSYEFQVKPKNPLGEGPVSNTVAFS	K	S	I	P	K	N	28	0	3258.62	A0A1S5UZ16;D3YTG3;Q7Z7G0;B4DSV9;H0Y897	A0A1S5UZ16	912	939	ABI3BP	Target of Nesh-SH3	yes	no	3;4	1.2333e-49	167.78	86187000	85520000	40791000	80989000	81113000	144870000	898590000	314900000	878320000	214	1373;1374	8572;8573;8574;8575;8576;8577;8578;8579;8580;8581;8582;8583;8584;8585	12599;12600;12601;12602;12603;12604;12605;12606;12607;12608;12609;12610;12611;12612;12613;12614	12602	403;404	39	15	86187000	72248000	43736000	39476000	98861000	124670000	116090000	24610000	95321000
1232	SLDNDNYVFTAPYFNK	WQENPETYEDSFYKRSLDNDNYVFTAPYFN	LDNDNYVFTAPYFNKSGPGAYESGIMVSKA	R	S	L	N	K	S	16	0	1906.87	Q9UIU0;P54289;Q9UDQ3	Q9UIU0	774	789	CACNA2D1;WUGSC:H_DJ0560O14.1	Voltage-dependent calcium channel subunit alpha-2/delta-1;Voltage-dependent calcium channel subunit alpha-2-1;Voltage-dependent calcium channel subunit delta-1	yes	no	2	5.1274e-12	144.57	0	0	0	37697000	0	0	0	0	0	564	1376	8588	12617	12617	1038		1	0	0	0	18374000	0	0	0	0	0
1233	SLEAQGNSSHLDADTVR	IEAATAYTIFVPTNRSLEAQGNSSHLDADT	EAQGNSSHLDADTVRHHVVLGEALSMETLR	R	S	L	V	R	H	17	0	1798.84	Q0PNF2;Q9NY15	Q0PNF2	1172	1188	STAB1	Stabilin-1	yes	no	3	2.2623e-11	142.01	0	0	0	47093000	0	0	0	338840000	0	576	1377	8589;8590	12618;12619	12619	1083		2	0	0	0	22955000	0	0	0	26481000	0
1236	SLGNVNFTVSAEALESQELCGTEVPSVPEHGR	CANGRQTVSWAVTPKSLGNVNFTVSAEALE	ELCGTEVPSVPEHGRKDTVIKPLLVEPEGL	K	S	L	G	R	K	32	0	3412.62	P01023	P01023	864	895	A2M	Alpha-2-macroglobulin	yes	yes	3	7.6011e-78	198.02	0	0	0	73774000	0	0	0	0	0	520	1380	8596	12625;12626	12625	928		2	0	0	0	35960000	0	0	0	0	0
1237	SLGSGGSVSQLFSNFTGSVDDR	SSFSSSSRSGSSSSRSLGSGGSVSQLFSNF	VSQLFSNFTGSVDDRGTCQCSVSLPDTTFP	R	S	L	D	R	G	22	0	2216.03	A0A024QZ95;Q6UX06	A0A024QZ95	59	80	OLFM4	Olfactomedin-4	yes	no	2	3.1314e-82	179.17	0	0	0	0	0	0	0	0	0	8	1381	8597	12627	12627	10		1	0	0	0	0	0	0	0	0	0
1241	SLLEFNTTVSCDQQGTNHR	TYHSVGDSVLRSATRSLLEFNTTVSCDQQG	FNTTVSCDQQGTNHRVQSSIAFLCGKTLGT	R	S	L	H	R	V	19	0	2206.01	Q59EZ3;P11717	Q59EZ3	30	48	IGF2R	Cation-independent mannose-6-phosphate receptor	yes	no	3	0.00014951	103.9	0	0	0	9481300	0	0	0	0	0	541	1385	8635	12673	12673	975		1	0	0	0	4621500	0	0	0	0	0
1242	SLLHNETSAHR	ERQLLRKVAELEDEKSLLHNETSAHRQKTE	EDEKSLLHNETSAHRQKTESTLNALLQRVT	K	S	L	H	R	Q	11	0	1263.63	P47972	P47972	185	195	NPTX2	Neuronal pentraxin-2	yes	yes	3	0.0022819	89.403	0	0	0	3561500	0	0	0	0	0	562	1386	8636	12674	12674	1025		1	0	0	0	1736000	0	0	0	0	0
1243	SLNDTMHR	NREDRAVRDSLHLLKSLNDTMHRKFQETEQ	DSLHLLKSLNDTMHRKFQETEQTIQKLQQD	K	S	L	H	R	K	8	0	972.445	Q9BXX0	Q9BXX0	585	592	EMILIN2	EMILIN-2	yes	yes	2	0.021325	94.806	0	0	0	62868000	0	0	0	0	0	657	1387	8637	12675;12676	12676	1223		2	0	0	0	30644000	0	0	0	0	0
1245	SLPWNMTK	ARAAACEPVRIPLCKSLPWNMTKMPNHLHH	VRIPLCKSLPWNMTKMPNHLHHSTQANAIL	K	S	L	T	K	M	8	0	975.485	Q53QN4;D9ZGF6;B2R6W4;Q92765	Q53QN4	45	52	FRZB	Secreted frizzled-related protein 3	yes	no	2	0.011286	111.65	0	70789000	85617000	84343000	0	0	599450000	813870000	1057300000	321	1389	8639;8640;8641;8642;8643;8644;8645	12678;12679;12680;12681;12682;12683;12684;12685;12686	12686	591		9	0	59803000	91799000	41111000	0	0	77443000	63606000	114750000
1246	SLSNSTAR	LRDEEVHAGLGELLRSLSNSTARNVTWKLG	GLGELLRSLSNSTARNVTWKLGSRLYGPSS	R	S	L	A	R	N	8	0	834.42	E9PQ34;E9PJH8;E9PIG2;E9PRS3;Q9NPA9;E9PNX1;E9PK86;E9PMI5;E9PR70;E9PPV6;A8K259;A0A024R5K8;P50454	E9PQ34	70	77	SERPINH1;ra-a47	Serpin H1	yes	no	1;2	0.0030149	180.7	75179000	41811000	19523000	1267800000	840010000	750270000	464600000	2669900000	504290000	45	1390	8646;8647;8648;8649;8650;8651;8652;8653;8654;8655;8656;8657	12687;12688;12689;12690;12691;12692;12693;12694;12695;12696;12697;12698;12699	12693	77		13	75179000	35322000	20932000	617980000	1023800000	645660000	60022000	208660000	54728000
1248	SLTFNETYQDISELVYGAK	KSSKLVSANRLFGDKSLTFNETYQDISELV	NETYQDISELVYGAKLQPLDFKENAEQSRA	K	S	L	A	K	L	19	0	2177.05	A0A0K0Q2Z1;A0A024R944;A0A2S0BDD1;P01008	A0A0K0Q2Z1	183	201	SERPINC1	Antithrombin-III	yes	no	2;3	0	358.91	40184000	87665000	0	132600000	0	0	258040000	1112600000	927420000	77	1392	8660;8661;8662;8663;8664;8665;8666;8667	12702;12703;12704;12705;12706;12707;12708;12709;12710;12711;12712;12713;12714	12707	131		13	40184000	74060000	0	64632000	0	0	33336000	86953000	100650000
1249	SLTGLSDSVSQYSDAFLAANTSLDER	GEITLLKVNLNSVSKSLTGLSDSVSQYSDA	YSDAFLAANTSLDERERKVEAEVQAIQEQV	K	S	L	E	R	E	26	0	2746.29	Q9NT22	Q9NT22	597	622	EMILIN3	EMILIN-3	yes	yes	2	1.449e-21	137.45	0	0	9571900	0	0	0	0	0	0	663	1393	8668	12715	12715	1239		1	0	0	10263000	0	0	0	0	0	0
1250	SLTHHINNMKPSFTR	______________________________	SLTHHINNMKPSFTRENTLMFMHLSPILLL	-	S	L	T	R	E	15	0	1781.9	D2Y6X4	D2Y6X4	1	15	ND4		yes	yes	2	0.022984	57.203	0	0	0	0	0	0	0	0	0	458	1394	8669	12716	12716	808	87	1	0	0	0	0	0	0	0	0	0
1251	SLTQGSLIVGDLAPVNGTSQGK	TPLALGHFHTVTLLRSLTQGSLIVGDLAPV	IVGDLAPVNGTSQGKFQGLDLNEELYLGGY	R	S	L	G	K	F	22	0	2141.13	A0A024RAB6;P98160;A0A0U1RQT3;Q59EG0	A0A024RAB6	3720	3741	HSPG2	Basement membrane-specific heparan sulfate proteoglycan core protein;Endorepellin;LG3 peptide	yes	no	2;3	0	416.3	376870000	339620000	296700000	1119800000	166080000	272970000	3175200000	5217900000	3869600000	89	1395	8670;8671;8672;8673;8674;8675;8676;8677;8678;8679;8680;8681	12717;12718;12719;12720;12721;12722;12723;12724;12725;12726;12727;12728;12729;12730;12731;12732;12733;12734;12735;12736;12737;12738;12739	12724	184		22	376870000	286920000	318130000	545820000	202420000	234910000	410210000	407790000	419950000
1252	SLVTQYLNATGNR	SSYLSDSGSTGEHTKSLVTQYLNATGNRWC	TKSLVTQYLNATGNRWCSWSLSQARLLTSF	K	S	L	N	R	W	13	0	1435.74	A0A024R599;B4E2Z3;F5GZS6;J3KPF3;P08195;H0YFX4	A0A024R599	316	328	SLC3A2	4F2 cell-surface antigen heavy chain	yes	no	2	2.1116e-40	229.53	0	0	0	28299000	12540000	24881000	70812000	152470000	158390000	40	1396	8682;8683;8684;8685;8686;8687	12740;12741;12742;12743;12744;12745;12746	12740	68		7	0	0	0	13794000	15283000	21412000	9148200	11916000	17190000
1255	SNDTAASEYK	KAVSISPTNVILTWKSNDTAASEYKYVVKH	ILTWKSNDTAASEYKYVVKHKMENEKTITV	K	S	N	Y	K	Y	10	0	1084.47	E9PPH3;Q9NPR5;A0A087WTK0;A0A087WVC6;Q12913	E9PPH3	62	71	PTPRJ	Protein-tyrosine-phosphatase;Receptor-type tyrosine-protein phosphatase eta	yes	no	2	0.0010494	138.08	0	0	0	0	0	0	0	14727000	0	121	1399	8736;8737	12856;12857	12856	245		2	0	0	0	0	0	0	0	1150900	0
1256	SNHTQAANDPPEVTVFPK	NIAILNNNLNTLIQRSNHTQAANDPPEVTV	TQAANDPPEVTVFPKEPVELGQPNTLICHI	R	S	N	P	K	E	18	0	1950.94	A0A2K9UYS7;A0A172WCC2;A0A172WC90;A0A172WC80;A0A172WC77;A0A172WC74;Q95HB9;I2G9G1;A0A2U9K708;A0A2K9UYS6;A0A140EDI6	A0A2K9UYS7	108	125	HLA-DPA1		yes	no	3	0.0057547	67.43	0	0	0	7573900	0	15138000	0	0	0	192	1400	8738;8739	12858;12859;12860	12859	366		3	0	0	0	3691700	0	13027000	0	0	0
1257	SNHTQATNDPPEVTVFPK	NIAILNNNLNTLIQRSNHTQATNDPPEVTV	TQATNDPPEVTVFPKEPVELGQPNTLICHI	R	S	N	P	K	E	18	0	1980.95	A0A140T9H1;A0A140T914;A0A1L5LC20;X5CKE2;X5CMJ1;A0A172WC68;A0A172WC72;A0A172WC73;A0A172WCA5;A0A172WC71;A0A2U9K719;A0A140T9R4;A0A140T9U4;A0A140T9Y9;A0A140T9F8;A0A140T9D6;J3KQ99;A0A140C6V4;P20036	A0A140T9H1	108	125	HLA-DPA1	HLA class II histocompatibility antigen, DP alpha 1 chain	yes	no	3	3.81e-07	120.9	0	0	0	40126000	0	16854000	0	0	0	191	1401	8740;8741	12861;12862;12863	12862	365		3	0	0	0	19559000	0	14504000	0	0	0
1258	SNLTVLR	DCVMMFTYVELPSGKSNLTVLRE_______	YVELPSGKSNLTVLRE______________	K	S	N	L	R	E	7	0	801.471	H7C5U2;D3DNA1;L7RT22;P18084	H7C5U2	394	400	ITGB5	Integrin beta;Integrin beta-5	yes	no	2	1.1601e-16	155.51	0	0	0	61441000	0	0	0	0	0	459	1402	8742;8743;8744;8745;8746;8747;8748	12864;12865;12866;12867;12868;12869;12870	12864	812		7	0	0	0	29948000	0	0	0	0	0
1260	SNPDQADVDHDFVGDACDSDQDQNGDGHQDSR	DGDGIGDACDNCPQKSNPDQADVDHDFVGD	DSDQDQNGDGHQDSRGNCPTVPNSAQEDSD	K	S	N	S	R	G	32	0	3515.34	Q53FR6	Q53FR6	414	445			yes	yes	3	0.0029368	48.226	0	0	0	0	0	0	0	0	0	593	1405	8766	12894	12894	1108		1	0	0	0	0	0	0	0	0	0
1261	SNSSMHITDCR	QEKVTCKNGQGNCYKSNSSMHITDCRLTNG	NCYKSNSSMHITDCRLTNGSRYPNCAYRTS	K	S	N	C	R	L	11	0	1306.54	G3V357;W0UV93;P07998	G3V357	63	73	RNASE1;RAC1	Ribonuclease pancreatic	yes	no	2;3	4.7152e-80	241.4	601010000	543680000	888870000	496610000	399530000	134700000	5334200000	5282100000	4428400000	483	1406;1407;1408	8767;8768;8769;8770;8771;8772;8773;8774;8775;8776;8777;8778;8779;8780;8781;8782;8783;8784;8785;8786;8787;8788;8789;8790;8791;8792;8793;8794	12895;12896;12897;12898;12899;12900;12901;12902;12903;12904;12905;12906;12907;12908;12909;12910;12911;12912;12913;12914;12915;12916;12917;12918;12919;12920;12921;12922;12923;12924;12925;12926;12927;12928	12905	853	92	27	601010000	459310000	953050000	242060000	486950000	115920000	689130000	412810000	480600000
1263	SNVTLPAPRPPPQPGGHTVGAGVGSPSSQLYEHTVEGGEK	LVLLSTARAGPFSSRSNVTLPAPRPPPQPG	PSSQLYEHTVEGGEKQVVFTHRINLPPSTG	R	S	N	E	K	Q	40	0	3990.98	A0A3B3ISX9;A0A087WWA5;A0A140T9C0;A0A140T902;A0A140T8Y3;A0A140TA52;A0A140TA41;A0A140TA33;P22105;C9J7W4;A0A140T956	A0A3B3ISX9	30	69	TNXB	Tenascin-X	yes	no	4;5	1.8195e-104	194.36	0	0	0	142930000	0	0	726980000	0	381800000	259	1410;1411	8798;8799;8800;8801;8802;8803	12932;12933;12934;12935;12936;12937;12938;12939;12940	12934	496		8	0	0	0	69667000	0	0	93919000	0	41436000
1264	SNYTPITNVPPEVTVLTNSPVELR	NIAVDKANLEIMTKRSNYTPITNVPPEVTV	PPEVTVLTNSPVELREPNVLICVIDKFTPP	R	S	N	L	R	E	24	0	2639.38	B4E2U4;Q59GE3;B0UXD8;A0A1V0E3V4;A0A0G2JMH6;P01903;B4DLJ8	B4E2U4	42	65	HLA-DRA1;HLA-DRA	HLA class II histocompatibility antigen, DR alpha chain	yes	no	3	2.691e-06	113.3	0	0	0	78359000	0	0	0	0	0	172	1412	8804	12941	12941	340		1	0	0	0	38194000	0	0	0	0	0
1265	SPDVINGSPISQK	FWSKEKPKCVEISCKSPDVINGSPISQKII	CKSPDVINGSPISQKIIYKENERFQYKCNM	K	S	P	Q	K	I	13	0	1340.69	A0A024R962;P08603;A0A024R984;A8K5T0;Q5TFM2;A0A0D9SG88	A0A024R962	212	224	hCG_40889;CFH	Complement factor H	yes	no	2	0.00048149	115.41	0	0	0	0	0	0	0	0	0	79	1413	8805	12942	12942	136		1	0	0	0	0	0	0	0	0	0
1266	SPENISVVEK	DLSVHAPPSIIGNHRSPENISVVEKNSVSL	IGNHRSPENISVVEKNSVSLTCEASGIPLP	R	S	P	E	K	N	10	0	1100.57	Q96RW7	Q96RW7	2392	2401	HMCN1	Hemicentin-1	yes	yes	2	0.0015329	164.43	0	0	0	13765000	0	0	0	0	0	653	1414	8806;8807	12943;12944	12944	1219		2	0	0	0	6709500	0	0	0	0	0
1267	SPLGQANTSLELR	GPQPRDEGFYSCSARSPLGQANTSLELRLE	ARSPLGQANTSLELRLEGVRVILAPEAAVP	R	S	P	L	R	L	13	0	1384.73	H7C0M6;A5D8Z7;Q9BZZ2	H7C0M6	59	71	SIGLEC1	Sialoadhesin	yes	no	2	2.2183e-40	229.29	0	0	0	13160000	0	6992000	0	0	0	281	1415	8808;8809	12945;12946	12945	524		1	0	0	0	6414400	0	6017100	0	0	0
1268	SPVQENSSDLNK	YMAASIGTDFWYEYRSPVQENSSDLNKSIW	EYRSPVQENSSDLNKSIWDEFISDEADEKT	R	S	P	N	K	S	12	0	1316.62	D6RD48;D6RAZ7;D6RIU2;D6RDP6;D6RHU6;D6RDY1;D6RA76;D6RC11;D6R9S8;D6RCE6;D6RFX6;D6RDI6;D6RCR8;A0A0R4J2F2;Q9NY35	D6RD48	37	48	CLDND1	Claudin domain-containing protein 1	yes	no	2	1.1029e-287	280.38	0	0	0	11653000	0	0	0	0	63563000	178	1416	8810;8811;8812;8813;8814;8815	12947;12948;12949;12950;12951;12952	12950	345		6	0	0	0	5680000	0	0	0	0	6898300
1270	SPYYNVSDEISFHCYDGYTLR	CPRPHDFENGEYWPRSPYYNVSDEISFHCY	SDEISFHCYDGYTLRGSANRTCQVNGRWSG	R	S	P	L	R	G	21	0	2585.12	E7ETN3;B4E1Z4;A0A1U9X7I0;P00751;A0A1U9X7H5;A0A1U9X7H6;A0A1U9X7H7;A0A1U9X7H8;A0A0G2JH38;A0A1U9X7H4;A0A1U9X7H2;C9JRT3;D2KT85;D2KT84	E7ETN3	469	489	CFB;BF	Complement factor B;Complement factor B Ba fragment;Complement factor B Bb fragment	yes	no	3	6.5482e-40	198.31	0	51075000	18324000	69485000	0	0	0	141450000	52139000	471	1418	8817;8818;8819;8820;8821;8822	12954;12955;12956;12957;12958;12959;12960;12961;12962	12962	841		9	0	43149000	19647000	33869000	0	0	0	11055000	5658500
1271	SQILEGLGFNLTELSESDVHR	AAYAMLSLGACSHSRSQILEGLGFNLTELS	LGFNLTELSESDVHRGFQHLLHTLNLPGHG	R	S	Q	H	R	G	21	0	2343.17	P29622;A0A024R6I9	P29622	99	119	SERPINA4	Kallistatin	yes	no	2;3	6.4163e-235	282.06	0	116750000	0	30781000	0	0	233290000	895860000	385650000	52	1419	8823;8824;8825;8826;8827;8828;8829	12963;12964;12965;12966;12967;12968;12969;12970	12968	87		7	0	98629000	0	15004000	0	0	30139000	70014000	41854000
1274	SSLGGETPGQAANR	SSQIGSSRAKLNSIKSSLGGETPGQAANRS	KSSLGGETPGQAANRSAGMYQGLAFGGSKK	K	S	S	N	R	S	14	0	1343.64	Q9H3R7;Q9UBU2	Q9H3R7	40	53	DKK2	Dickkopf-related protein 2	yes	no	2	3.6803e-09	166.69	0	8041200	0	0	0	0	22943000	0	0	659	1422	8835;8836	12976;12977	12977	1225		2	0	6793300	0	0	0	0	2964000	0	0
1278	STGKPTLYNVSLVMSDTAGTCY	HEALPNRVTERTVDKSTGKPTLYNVSLVMS	YNVSLVMSDTAGTCY_______________	K	S	T	C	Y	-	22	0	2364.1	P01871;Q86TT1;P0DOX6	P01871	432	453	IGHM	Ig mu chain C region	yes	no	2	2.4659e-214	305.75	0	0	0	97363000	0	26150000	77108000	126180000	0	521	1426;1427	8850;8851;8852;8853;8854	12995;12996;12997;12998;12999;13000	12996	932	100	6	0	0	0	47458000	0	22504000	9961600	9861100	0
1281	SVCLENGTWTSPPICR	TYSCYSGYMLEGFLRSVCLENGTWTSPPIC	VCLENGTWTSPPICRAVCRFPCQNGGICQR	R	S	V	C	R	A	16	0	1875.86	Q5JB40;A0A0A0MSD0;Q4LDE5;B3KQM1	Q5JB40	3457	3472	SVEP1	Sushi, von Willebrand factor type A, EGF and pentraxin domain-containing protein 1	yes	no	2	0.00015835	106.01	0	0	0	0	0	0	0	0	0	154	1430	8858	13006	13006	311		1	0	0	0	0	0	0	0	0	0
1283	SVNASNYGLSPDR	ETGQSYTILSNRTMKSVNASNYGLSPDRQF	MKSVNASNYGLSPDRQFVYLESDYSKLWRY	K	S	V	D	R	Q	13	0	1378.65	A0A172Q3A0;A0A0D9SEN1;B2RD89;A0A140GPP7;Q12884;F8WF29;C9J131	A0A172Q3A0	70	82	FAP	Prolyl endopeptidase FAP;Antiplasmin-cleaving enzyme FAP, soluble form	yes	no	2	5.2913e-182	284.73	0	0	0	0	0	0	236850000	641890000	0	168	1432	8860;8861;8862;8863;8864	13008;13009;13010;13011;13012;13013	13013	331		6	0	0	0	0	0	0	30599000	50165000	0
1284	SVNTSVHIYDK	KGLYTCRVRSGPSFKSVNTSVHIYDKAFIT	PSFKSVNTSVHIYDKAFITVKHRKQQVLET	K	S	V	D	K	A	11	0	1261.63	A0A1W2PNW4;L7RSL3;P17948	A0A1W2PNW4	321	331	FLT1	Receptor protein-tyrosine kinase;Vascular endothelial growth factor receptor 1	yes	no	3	0.012777	74.76	0	0	0	0	0	0	0	0	0	218	1433	8865;8866	13014;13015	13014	411		2	0	0	0	0	0	0	0	0	0
1285	SVNVSVICPSPSMLPAER	SAHLQHLHLDHNKIKSVNVSVICPSPSMLP	VSVICPSPSMLPAERDSFSYGPHLRYLRLD	K	S	V	E	R	D	18	0	1941.97	B2RC89;O60938	B2RC89	296	313	KERA	Keratocan	yes	no	2	0.001556	86.498	0	0	0	0	0	0	0	0	40972000	334	1434	8867	13016	13016	614		1	0	0	0	0	0	0	0	0	4446500
1286	SVVAPATDGGLNLTSTFLR	SSWLREKKAALSMCKSVVAPATDGGLNLTS	PATDGGLNLTSTFLRKNQCETRTMLLQPAG	K	S	V	L	R	K	19	0	1918.02	A0A024R8G3;Q5SQ11;P41222	A0A024R8G3	67	85	PTGDS	Prostaglandin-H2 D-isomerase	yes	no	2;3	3.1592e-90	247.3	0	60637000	0	239640000	56241000	84343000	2400700000	1331100000	1378800000	70	1435	8868;8869;8870;8871;8872;8873;8874;8875	13017;13018;13019;13020;13021;13022;13023;13024;13025;13026;13027;13028;13029;13030;13031;13032;13033	13021	118		17	0	51227000	0	116810000	68546000	72583000	310150000	104030000	149630000
1288	SYNDSVDPR	VLGPTAMRKYLPTYRSYNDSVDPRIANVFT	YLPTYRSYNDSVDPRIANVFTNAFRYGHTL	R	S	Y	P	R	I	9	0	1051.46	P05164	P05164	481	489	MPO	Myeloperoxidase;Myeloperoxidase;89 kDa myeloperoxidase;84 kDa myeloperoxidase;Myeloperoxidase light chain;Myeloperoxidase heavy chain	yes	yes	2	0.0018702	131.44	0	12089000	5310800	37461000	0	0	0	0	0	531	1437	8877;8878;8879	13035;13036;13037	13035	950		3	0	10213000	5694200	18260000	0	0	0	0	0
1289	SYNVTSVLFR	PQKMYATIYELKEDKSYNVTSVLFREKAQK	LKEDKSYNVTSVLFREKAQKCDYWIRTFVP	K	S	Y	F	R	E	10	0	1184.62	X6R8F3;B2ZDQ1;P80188	X6R8F3	83	92	LCN2;NGAL	Neutrophil gelatinase-associated lipocalin	yes	no	2	0.010771	98.055	0	18288000	9087400	0	0	0	0	45764000	0	338	1438	8880;8881;8882	13038;13039;13040	13038	619		3	0	15450000	9743500	0	0	0	0	3576600	0
1291	TAADTTGLQPILNQFTPANISR	LTPITIFMEYRLDYRTAADTTGLQPILNQF	LQPILNQFTPANISRQAHILLDCGEDNVCK	R	T	A	S	R	Q	22	0	2328.21	L7RXH0;A5YM53;P06756	L7RXH0	597	618	ITGAV	Integrin alpha-V;Integrin alpha-V heavy chain;Integrin alpha-V light chain	yes	no	2	0	326.56	0	0	0	168710000	0	0	0	611830000	0	285	1440	8885;8886;8887;8888;8889	13043;13044;13045;13046;13047;13048;13049;13050	13043	534		8	0	0	0	82234000	0	0	0	47816000	0
1294	TALFPDLLAQGNASLR	SFAEGQDQGSAYANRTALFPDLLAQGNASL	ALFPDLLAQGNASLRLQRVRVADEGSFTCF	R	T	A	L	R	L	16	0	1685.91	B4DK26;A8K6Q6;Q5ZPR3;A8K9J6;A0A0C4DGH0;H0YLT8;H0YN85;H0YK40;H0YK59	B4DK26	39	54	CD276	CD276 antigen	yes	no	2	2.1104e-29	210.31	0	0	0	242630000	158560000	157020000	684550000	1141400000	492260000	302	1443	8892;8893;8894;8895;8896;8897	13053;13054;13055;13056;13057;13058;13059;13060;13061	13053	562		9	0	0	0	118270000	193260000	135130000	88438000	89206000	53423000
1295	TALWVATDHNMDNTSTVLR	TTLGALERLRHPRERTALWVATDHNMDNTS	VATDHNMDNTSTVLREWLVAVKSLYHSVEW	R	T	A	L	R	E	19	0	2144.03	Q8NBJ5	Q8NBJ5	84	102	COLGALT1	Procollagen galactosyltransferase 1	yes	yes	2;3	1.3039e-31	187.31	0	0	0	56085000	0	0	151850000	420960000	170310000	638	1444;1445	8898;8899;8900;8901;8902;8903	13062;13063;13064;13065;13066;13067;13068;13069;13070;13071	13069	1197;1198	119	9	0	0	0	27338000	0	0	19617000	32899000	18483000
1296	TANDTSTEAYNLLLR	ERHKQEADDIVRVAKTANDTSTEAYNLLLR	TANDTSTEAYNLLLRTLAGENQTAFEIEEL	K	T	A	L	R	T	15	0	1680.83	A0A024R972;P11047	A0A024R972	1167	1181	LAMC1	Laminin subunit gamma-1	yes	no	2	2.5806e-179	306.55	0	0	0	130250000	0	36944000	788490000	2055000000	311630000	81	1446	8904;8905;8906;8907;8908;8909;8910	13072;13073;13074;13075;13076;13077;13078;13079	13072	163		8	0	0	0	63489000	0	31793000	101870000	160600000	33820000
1297	TASNLTVSVLEAEGVFEK	EHCPSQVTVKAELLKTASNLTVSVLEAEGV	NLTVSVLEAEGVFEKGSFKTLTLPSLPLNS	K	T	A	E	K	G	18	0	1892.97	Q6YHK3	Q6YHK3	65	82	CD109	CD109 antigen	yes	yes	2	1.7298e-53	222.16	0	0	0	0	0	0	0	460600000	302050000	619	1447	8911;8912;8913;8914	13080;13081;13082;13083;13084	13080	1163		5	0	0	0	0	0	0	0	35997000	32780000
1299	TAVNCSSDFDACLITK	SLQCYNCPNPTADCKTAVNCSSDFDACLIT	AVNCSSDFDACLITKAGLQVYNKCWKFEHC	K	T	A	T	K	A	16	0	1800.8	E9PNW4;E9PI80;A0A2U3TZL5;Q6FHM9;E9PR17;P13987	E9PNW4	40	55	CD59	CD59 glycoprotein	yes	no	2	4.7981e-89	210.34	0	217880000	201930000	307900000	0	74616000	0	2783200000	1387500000	239	1449	8916;8917;8918;8919;8920;8921;8922;8923;8924;8925;8926;8927;8928;8929;8930;8931	13086;13087;13088;13089;13090;13091;13092;13093;13094;13095;13096;13097;13098;13099;13100;13101;13102;13103;13104;13105;13106;13107;13108;13109	13087	437		22	0	184070000	216510000	150080000	0	64212000	0	217510000	150580000
1300	TCDWLPKPNMSASCK	KDNATEEEILVYLEKTCDWLPKPNMSASCK	TCDWLPKPNMSASCKEIVDSYLPVILDIIK	K	T	C	C	K	E	15	0	1793.79	Q53FJ5;A0A024QZQ2;C9JIZ6;B4DRB7;Q59EN5;P07602;B4DEK5	Q53FJ5	93	107	PSAP	Prosaposin;Saposin-A;Saposin-B-Val;Saposin-B;Saposin-C;Saposin-D	yes	no	3	0.01314	60.307	0	0	0	0	0	0	0	0	0	11	1450	8932	13110	13110	15		1	0	0	0	0	0	0	0	0	0
1301	TCHESYNR	GMAQHYLELGAEIARTCHESYNRTFMKLGP	LGAEIARTCHESYNRTFMKLGPEAFRFDGG	R	T	C	N	R	T	8	0	1065.43	P33908	P33908	507	514	MAN1A1	Mannosyl-oligosaccharide 1,2-alpha-mannosidase IA	yes	yes	3	0.01713	75.213	0	15941000	0	0	6349000	0	0	0	0	557	1451	8933;8934	13111;13112	13112	1020		2	0	13467000	0	0	7738200	0	0	0	0
1302	TCNPETFPSSNESR	VYKIFDDSPCPFTAKTCNPETFPSSNESRQ	KTCNPETFPSSNESRQCPNARCQFAFYGGE	K	T	C	S	R	Q	14	0	1624.68	A0A088QF11;A0A088QCU6;A0A024R798;A0A024R7D2;Q8IWA5	A0A088QF11	405	418	SLC44A2	Choline transporter-like protein 2	yes	no	2	2.1847e-66	252.21	38278000	159340000	138680000	184210000	81118000	84791000	1038300000	1171000000	586090000	56	1452	8935;8936;8937;8938;8939;8940;8941;8942;8943;8944	13113;13114;13115;13116;13117;13118;13119;13120;13121;13122;13123;13124;13125;13126;13127	13115	95		15	38278000	134610000	148690000	89789000	98867000	72969000	134150000	91518000	63606000
1303	TCNQTTGQCPCK	ACKACDCHPVGAAGKTCNQTTGQCPCKDGV	AGKTCNQTTGQCPCKDGVTGITCNRCAKGY	K	T	C	C	K	D	12	0	1453.57	O95631;H7BZF4;O00634	O95631	415	426	NTN1;NTN3	Netrin-1;Netrin-3	yes	no	2	0	313.01	0	0	0	39115000	35797000	18448000	114910000	75843000	300300000	519	1453	8945;8946;8947;8948;8949;8950;8951	13128;13129;13130;13131;13132;13133;13134;13135;13136	13128	926		8	0	0	0	19066000	43629000	15875000	14846000	5927300	32591000
1304	TCPAGVMGENNTLVWK	CIQCAHYIDGPHCVKTCPAGVMGENNTLVW	CPAGVMGENNTLVWKYADAGHVCHLCHPNC	K	T	C	W	K	Y	16	0	1775.83	P00533;E7BSV0;A8K2T7;A9CB80;Q2TTR7;F2YGG7;E9PFD7;B7Z2I3;Q504U8;Q59FL8;Q68GS6;A0A1W2PRR9;Q147T7;A2VCQ7;Q9H3C8;A0A2D3C335;Q9H3D0	P00533	594	609	EGFR	Epidermal growth factor receptor;Receptor protein-tyrosine kinase	yes	no	2	3.7447e-14	146.36	0	0	0	12692000	0	0	0	0	0	219	1454	8952;8953	13137;13138	13138	414;415		2	0	0	0	6186500	0	0	0	0	0
1305	TCSDAAYNHTTFPNLLQHR	PPAADSATCVDLQLRTCSDAAYNHTTFPNL	AAYNHTTFPNLLQHRSWEVVEASSEYILLS	R	T	C	H	R	S	19	0	2245.03	A0A384MDV6;Q66K79	A0A384MDV6	50	68	CPZ	Carboxypeptidase Z	yes	no	3;4	1.0376e-07	88.551	0	0	0	5521900	0	19465000	0	0	0	245	1455	8954;8955;8956	13139;13140;13141	13141	454		3	0	0	0	2691500	0	16751000	0	0	0
1306	TCTEFHNCTECR	DTKKNLCRKCSENCKTCTEFHNCTECRDGL	NCKTCTEFHNCTECRDGLSLQGSRCSVSCE	K	T	C	C	R	D	12	0	1613.6	Q5JSG7;Q92824	Q5JSG7	419	430	PCSK5	Proprotein convertase subtilisin/kexin type 5	yes	no	3	0.0021698	102.66	0	0	0	4990900	0	0	0	0	0	598	1456	8957	13142	13142	1119		1	0	0	0	2432700	0	0	0	0	0
1308	TCVSNCTASQFVCK	KCACPTNFYLGSDGRTCVSNCTASQFVCKN	RTCVSNCTASQFVCKNDKCIPFWWKCDTED	R	T	C	C	K	N	14	0	1660.7	Q07954;Q59FG2;Q6LBN5	Q07954	3329	3342	LRP1	Prolow-density lipoprotein receptor-related protein 1;Low-density lipoprotein receptor-related protein 1 85 kDa subunit;Low-density lipoprotein receptor-related protein 1 515 kDa subunit;Low-density lipoprotein receptor-related protein 1 intracellular domain	yes	no	2	3.2403e-138	278.37	0	14267000	10825000	69472000	0	21557000	306580000	0	0	575	1458	8962;8963;8964;8965;8966;8967	13147;13148;13149;13150;13151;13152;13153	13153	1079		7	0	12053000	11606000	33863000	0	18551000	39607000	0	0
1309	TDDEVVQREEEAIQLDGLNASQIR	GTVEEDLGKSREGSRTDDEVVQREEEAIQL	EEAIQLDGLNASQIRELREKSEKFAFQAEV	R	T	D	I	R	E	24	1	2727.33	Q59FC6;Q5CAQ5;V9HWP2;P14625;Q96GW1;A0A1W2PRR1;B4DQX3	Q59FC6	70	93	TRA1;HEL-S-125m;HSP90B1	Endoplasmin	yes	no	3	0.023373	47.237	0	0	0	0	0	0	0	0	0	547	1459	8968	13154	13154	986		1	0	0	0	0	0	0	0	0	0
1312	TEAGAFEYVPDPTFENFTGGVK	LTVLIEMDGHRALLRTEAGAFEYVPDPTFE	YVPDPTFENFTGGVKKQVNKLIHARGTNLN	R	T	E	V	K	K	22	0	2375.1	O15031;H0Y6J7;Q3LIB1	O15031	1084	1105	PLXNB2;Nbla00445	Plexin-B2	yes	no	2	3.2263e-94	212.87	0	0	0	38316000	0	0	0	0	0	504	1462	8972	13159	13159	889		0	0	0	0	18676000	0	0	0	0	0
1313	TEEHLAYGIENNSTLLECTPR	QQCFGQQFVGDALDKTEEHLAYGIENNSTL	YGIENNSTLLECTPRSLQAKVIWFVQKGRE	K	T	E	P	R	S	21	0	2446.14	A0A2R8YCX5;B4DLY1;O15041	A0A2R8YCX5	585	605	SEMA3E	Semaphorin-3E	yes	no	3	1.517e-15	140.63	26281000	30348000	0	0	0	0	0	0	0	237	1463	8973;8974	13160;13161;13162;13163;13164	13161	432		5	26281000	25639000	0	0	0	0	0	0	0
1316	TEKEPLSDPVGTCYLSTDNFTR	HGSSILACAPLYSWRTEKEPLSDPVGTCYL	DPVGTCYLSTDNFTRILEYAPCRSDFSWAA	R	T	E	T	R	I	22	1	2529.17	B2R627;A8K6A5;A0A024RB01;P08648	B2R627	164	185	ITGA5	Integrin alpha-5;Integrin alpha-5 heavy chain;Integrin alpha-5 light chain	yes	no	3	2.9293e-46	192.27	0	0	0	51724000	0	0	174450000	306270000	0	95	1466	8980;8981;8982;8983	13177;13178;13179;13180;13181;13182	13182	198		6	0	0	0	25212000	0	0	22538000	23936000	0
1317	TELFSSSCPGGIMLNETGQGYQR	______________________________	PGGIMLNETGQGYQRFLLYNRSPHPPEKCV	K	T	E	Q	R	F	23	0	2531.14	I2D5J2;I2D5I8;A0A1U9X793;Q5SRP5;O95445	I2D5J2	6	28	APOM	Apolipoprotein M	yes	no	2	3.792e-57	211.45	0	0	0	0	0	0	0	72726000	0	216	1467	8984	13183	13183	407		1	0	0	0	0	0	0	0	5683700	0
1319	TENEVFQGIWLNWLDALHGEIK	PEGERTNFTLDALRRTENEVFQGIWLNWLD	GIWLNWLDALHGEIKQDFVGCVPDAGDWGP	R	T	E	I	K	Q	22	0	2611.31	A0A2P9AT05	A0A2P9AT05	493	514			yes	yes	2	0.0093217	63.292	0	0	0	0	0	0	0	0	0	230	1469	8986	13185	13185	424		1	0	0	0	0	0	0	0	0	0
1320	TEVMPLALEVVNTYQKNAK	MENTYPKDTERDGGKTEVMPLALEVVNTYQ	PLALEVVNTYQKNAKGFTGNTEGSVLKMEA	K	T	E	A	K	G	19	1	2147.13	Q68DQ2	Q68DQ2	1753	1771	CRYBG3	Very large A-kinase anchor protein	yes	yes	2	0.022641	54.7	0	0	0	0	0	0	0	765230000	0	604	1470	8987	13186	13186	1129;1130	114	1	0	0	0	0	0	0	0	59804000	0
1321	TFANGSLAFR	LSATFQGHPMNDPTRTFANGSLAFRVQAFS	NDPTRTFANGSLAFRVQAFSRSSRPAQPPR	R	T	F	F	R	V	10	0	1082.55	X6R6A3;A0A087WV34;A0A087X0W3;Q8WWB7	X6R6A3	98	107	GLMP	Glycosylated lysosomal membrane protein	yes	no	2	0.0020313	113.71	0	0	0	11078000	0	0	0	0	0	128	1471	8988	13187	13187	251		1	0	0	0	5399900	0	0	0	0	0
1322	TFAVYLNNTGYR	ENCSSPSWQAMHEPRTFAVYLNNTGYRTVF	EPRTFAVYLNNTGYRTVFFGKYLNEYNGSY	R	T	F	Y	R	T	12	0	1417.7	Q7Z2W2;A0A024R809;Q8IWU6;E9PJL8	Q7Z2W2	125	136	DKFZp686F13142;SULF1	Extracellular sulfatase Sulf-1	yes	no	2	8.2275e-13	200.71	12031000	10713000	7006800	15410000	0	0	63834000	143900000	92845000	63	1472	8989;8990;8991;8992;8993;8994;8995	13188;13189;13190;13191;13192;13193;13194;13195;13196	13195	106		9	12031000	9050300	7512700	7511500	0	0	8246800	11246000	10076000
1323	TFAVYLNSTGYR	ENCSSPSWQAQHESRTFAVYLNSTGYRTAF	ESRTFAVYLNSTGYRTAFFGKYLNEYNGSY	R	T	F	Y	R	T	12	0	1390.69	Q8IWU5;B1AMP9	Q8IWU5	126	137	SULF2	Extracellular sulfatase Sulf-2	yes	no	2	6.394e-72	252.82	0	105600000	65446000	0	6327900	11584000	454870000	170820000	512160000	633	1473	8996;8997;8998;8999;9000;9001;9002	13197;13198;13199;13200;13201;13202;13203;13204;13205;13206;13207;13208	13199	1185		12	0	89216000	70171000	0	7712500	9969200	58765000	13350000	55583000
1326	TFYWDFYTNR	FNYKYTACLCDDNPKTFYWDFYTNRTVQIA	DDNPKTFYWDFYTNRTVQIAAVVDVIRELG	K	T	F	N	R	T	10	0	1411.62	P12273	P12273	97	106	PIP	Prolactin-inducible protein	yes	yes	2	8.1966e-23	160.56	0	0	0	0	0	0	0	0	0	542	1476	9013;9014	13219;13220	13219	977		2	0	0	0	0	0	0	0	0	0
1328	TGEINITSIVDR	GIDQPPYGIFVINQKTGEINITSIVDREVT	NQKTGEINITSIVDREVTPFFIIYCRALNS	K	T	G	D	R	E	12	0	1316.69	Q02413	Q02413	106	117	DSG1	Desmoglein-1	yes	yes	2	1.1909e-08	191.53	6458800	0	5888900	0	0	0	250170000	0	79270000	570	1478	9019;9020;9021;9022	13229;13230;13231;13232	13232	1048		4	6458800	0	6314000	0	0	0	32319000	0	8602900
1329	TGEQFSFNTTAAQPQYFK	TYQLRVSRMDDFVLRTGEQFSFNTTAAQPQ	QFSFNTTAAQPQYFKYEFPEGVDSVIVKVT	R	T	G	F	K	Y	18	0	2063.96	E9PME7;E9PPN9;B4DZN7;Q24JR2;F5H8L4;C9JBG5;Q8NBJ9	E9PME7	57	74	SIDT2	SID1 transmembrane family member 2	yes	no	2	3.8026e-14	143.42	0	0	0	12232000	0	0	0	0	0	402	1479	9023	13233	13233	721		0	0	0	0	5962100	0	0	0	0	0
1330	TGFYGENCSTPEFLTR	CMSVGFDQYKCDCTRTGFYGENCSTPEFLT	GFYGENCSTPEFLTRIKLFLKPTPNTVHYI	R	T	G	T	R	I	16	0	1877.83	D9MWI3;Q6ZYK7;Q8IZA9;P35354	D9MWI3	19	34	PTGS2;COX-2	Prostaglandin G/H synthase 2	yes	no	2	0.00021368	113.07	0	15092000	0	0	0	0	0	0	0	466	1480	9024	13234	13234	820		1	0	12749000	0	0	0	0	0	0	0
1332	THANGSIK	FSVSVFEDFIYWSDRTHANGSIKRGSKDNA	FIYWSDRTHANGSIKRGSKDNATDSVPLRT	R	T	H	I	K	R	8	0	826.43	Q07954	Q07954	2114	2121	LRP1	Prolow-density lipoprotein receptor-related protein 1;Low-density lipoprotein receptor-related protein 1 85 kDa subunit;Low-density lipoprotein receptor-related protein 1 515 kDa subunit;Low-density lipoprotein receptor-related protein 1 intracellular domain	yes	yes	2	0.0033856	138.06	0	0	0	6432400	7966400	0	0	24480000	0	575	1482	9033;9034;9035;9036	13244;13245;13246;13247;13248;13249;13250	13245	1080		7	0	0	0	3135300	9709400	0	0	1913100	0
1334	THTNISESHPNATFSAVGEASICEDDWNSGER	SVTISWTRQNGEAVKTHTNISESHPNATFS	GEASICEDDWNSGERFTCTVTHTDLPSPLK	K	T	H	E	R	F	32	0	3517.51	P01871;A0A1B0GUU9;Q86TT1	P01871	269	300	IGHM	Ig mu chain C region	yes	no	3;4	1.1891e-58	167.07	0	0	0	102390000	0	0	0	0	0	521	1484	9040;9041	13254;13255;13256	13254	933;934		3	0	0	0	49909000	0	0	0	0	0
1335	TILVDNNTWNNTHISR	SWWDYGYQITAMANRTILVDNNTWNNTHIS	ILVDNNTWNNTHISRVGQAMASTEEKAYEI	R	T	I	S	R	V	16	0	1896.94	A0A024R3J7;P46977	A0A024R3J7	539	554	hCG_2032701;STT3A	Dolichyl-diphosphooligosaccharide--protein glycosyltransferase subunit STT3A	yes	no	2;3	2.0741e-263	302.15	40339000	52918000	40508000	588200000	0	134200000	1678200000	3645700000	1140900000	31	1485;1486	9042;9043;9044;9045;9046;9047;9048;9049;9050;9051;9052	13257;13258;13259;13260;13261;13262;13263;13264;13265;13266;13267;13268;13269;13270;13271;13272	13263	41;42;43		14	40339000	44705000	43433000	286710000	0	115490000	216810000	284920000	123820000
1337	TKQEVLSHISNMSYIGGTNQTGK	FNGNPHTEFLLNTYRTKQEVLSHISNMSYI	ISNMSYIGGTNQTGKGLEYIMQSHLTKAAG	R	T	K	G	K	G	23	1	2492.23	D9ZGF2;P12111;C9JNG9	D9ZGF2	98	120	COL6A3	Collagen alpha-3(VI) chain	yes	no	3	0.0062169	68.445	0	0	0	9740100	0	0	0	0	0	468	1488	9054	13274	13274	824;825		1	0	0	0	4747600	0	0	0	0	0
1338	TLAGENQTAFEIEELNR	TANDTSTEAYNLLLRTLAGENQTAFEIEEL	AGENQTAFEIEELNRKYEQAKNISQDLEKQ	R	T	L	N	R	K	17	0	1933.94	A0A024R972;P11047	A0A024R972	1182	1198	LAMC1	Laminin subunit gamma-1	yes	no	2;3	0	390.16	158680000	159930000	55049000	394090000	0	0	1322300000	253880000	1501500000	81	1489	9055;9056;9057;9058;9059;9060;9061;9062	13275;13276;13277;13278;13279;13280;13281;13282;13283	13278	164		9	158680000	135110000	59024000	192090000	0	0	170820000	19842000	162950000
1340	TLEQQDSANVTWQIPTAK	VEAPQINCPKDIEAKTLEQQDSANVTWQIP	QQDSANVTWQIPTAKDNSGEKVSVHVHPAF	K	T	L	A	K	D	18	0	2029.01	Q5JB40;A0A0A0MSD0;Q4LDE5	Q5JB40	577	594	SVEP1	Sushi, von Willebrand factor type A, EGF and pentraxin domain-containing protein 1	yes	no	2	1.1059e-189	305.98	0	0	0	18572000	0	0	0	0	0	154	1491	9064	13285	13285	312		1	0	0	0	9052500	0	0	0	0	0
1342	TLFPNYFNGSEIIIAGK	IRIDYPPSSVVQATKTLFPNYFNGSEIIIA	FPNYFNGSEIIIAGKLVDRKLDHLHVEVTA	K	T	L	G	K	L	17	0	1882.98	Q96JW9;Q96JV8;G5E9D8;A0A096LP62;C9J2H1;Q86UX2	Q96JW9	196	212	ITIH5	Inter-alpha-trypsin inhibitor heavy chain H5	yes	no	2	8.1027e-15	150.21	29291000	0	19594000	28800000	0	0	169250000	258220000	155740000	147	1493	9066;9067;9068;9069;9070;9071	13287;13288;13289;13290;13291;13292;13293;13294	13290	297		8	29291000	0	21009000	14038000	0	0	21865000	20180000	16902000
1343	TLLNASCDNMLMGIK	AEMLLQEAEEEKKIRTLLNASCDNMLMGIK	TLLNASCDNMLMGIKSLKIVKKMMDTHGSW	R	T	L	I	K	S	15	0	1679.8	Q5HYE3;Q6UWY5	Q5HYE3	135	149	DKFZp686H1812;OLFML1	Olfactomedin-like protein 1	yes	no	2	4.3792e-88	227.48	0	0	0	175560000	0	0	420080000	0	0	596	1494;1495	9072;9073;9074;9075;9076	13295;13296;13297;13298;13299;13300	13299	1117	112	6	0	0	0	85575000	0	0	54271000	0	0
1344	TLLNASR	QPATYTCVVSHEDSRTLLNASRSLEVSYLA	VVSHEDSRTLLNASRSLEVSYLAMTPLIPQ	R	T	L	S	R	S	7	0	773.44	A0A0A0MS09;Q8NF20;P0DOX3;P01880	A0A0A0MS09	364	370	IGHD;FLJ00382	Ig delta chain C region	yes	no	2	0.00083583	128.48	0	0	0	0	0	0	0	0	0	151	1496	9077;9078	13301;13302	13301	306		2	0	0	0	0	0	0	0	0	0
1346	TLNQSSDELQLSMGNAMFVK	TSEAEIHQSFQHLLRTLNQSSDELQLSMGN	SDELQLSMGNAMFVKEQLSLLDRFTEDAKR	R	T	L	V	K	E	20	0	2212.05	A0A024R6P0;B3KS79;P01011;G3V595	A0A024R6P0	125	144	SERPINA3	Alpha-1-antichymotrypsin;Alpha-1-antichymotrypsin His-Pro-less	yes	no	2	1.8618e-60	216.83	9535300	31589000	0	38083000	0	0	0	45015000	0	55	1498;1499	9081;9082;9083;9084;9085	13305;13306;13307;13308;13309;13310;13311	13310	91	3;4	7	9535300	26687000	0	18563000	0	0	0	3518000	0
1349	TLSELMSQTGHLGLANASAPSGEQLLR	GHAKTLLAAIRAVDRTLSELMSQTGHLGLA	GLANASAPSGEQLLRTLAEVERLLWEMRAR	R	T	L	L	R	T	27	0	2780.41	O15230	O15230	2288	2314	LAMA5	Laminin subunit alpha-5	yes	yes	3	4.7475e-108	190.28	0	0	0	0	0	0	0	0	0	505	1502	9088	13314	13314	891		1	0	0	0	0	0	0	0	0	0
1350	TLSPTGNISSAPK	MMIHPAAFTLEHIPKTLSPTGNISSAPKDF	PKTLSPTGNISSAPKDFAVYGLENEYQEEG	K	T	L	P	K	D	13	0	1271.67	B4E278;H0Y6N5;H0Y742;A7MCZ7;E9PHI4;A0A146IHP0;A4D2Q0;O94901;Q5S4N2	B4E278	497	509	SUN1;UNC84A	SUN domain-containing protein 1	yes	no	2	0.0045568	100.88	0	0	0	33712000	0	0	0	0	0	203	1503	9089	13315	13315	383		1	0	0	0	16432000	0	0	0	0	0
1351	TLSRPSETCNETTK	HVIDFHNPADVVEIRTLSRPSETCNETTKL	RTLSRPSETCNETTKLGDFVRYHYNCSLLD	R	T	L	T	K	L	14	0	1622.76	Q6ZME7;Q658U4;A0A024R1W3;Q96AY3;Q8NAG5;B4DJJ5;H0Y827	Q6ZME7	384	397	DKFZp666D193;FKBP10	Peptidyl-prolyl cis-trans isomerase FKBP10	yes	no	2;3	4.1883e-09	169.23	0	0	0	7034600	0	0	6410200	63372000	28442000	23	1504	9090;9091;9092;9093;9094	13316;13317;13318;13319;13320;13321;13322	13321	27		7	0	0	0	3428900	0	0	828140	4952700	3086700
1352	TLTNQTEAELATPEGIYERPVDYLPER	NLRYFEQLLEEEREKTLTNQTEAELATPEG	PEGIYERPVDYLPERDVYESLCRGEGVKLT	K	T	L	E	R	D	27	0	3104.53	Q05DA4;Q5HYD8;O15460	Q05DA4	232	258	P4HA2;DKFZp686M0919	Prolyl 4-hydroxylase subunit alpha-2	yes	no	3	2.6064e-256	316.71	21226000	0	7062500	62086000	0	0	123230000	0	186450000	507	1505	9095;9096;9097;9098;9099	13323;13324;13325;13326;13327;13328;13329	13327	892		7	21226000	0	7572500	30262000	0	0	15921000	0	20235000
1354	TLYETEVFSTDFSNISAAK	GKHLKPLAKFLNDVKTLYETEVFSTDFSNI	TEVFSTDFSNISAAKQEINSHVEMQTKGKV	K	T	L	A	K	Q	19	0	2122.01	P05543	P05543	152	170	SERPINA7	Thyroxine-binding globulin	yes	yes	2	4.6726e-120	267.93	0	0	0	16857000	0	0	0	136540000	0	532	1507	9102;9103	13332;13333	13333	951		2	0	0	0	8216400	0	0	0	10671000	0
1355	TMFPNLTDVR	GVEWTSCAEVVSQEKTMFPNLTDVREVVTD	VSQEKTMFPNLTDVREVVTDQFLCSGTQED	K	T	M	V	R	E	10	0	1192.59	E7ETN3;B4E1Z4;P06681;A0A0G2JL69;Q53GZ8;A0A1U9X8X9;A0A1U9X8X3;A0A1U9X8W4;Q53HP3;Q5JP69;B4DV48;Q7Z685;E9PDZ0;B4DQI1;A0A0G2JIE7;H0Y3H6	E7ETN3	418	427	C2;DKFZp779M0311	Complement C2;Complement C2b fragment;Complement C2a fragment	yes	no	2	0.00087984	148.62	0	9373400	0	40717000	0	0	177080000	628650000	231570000	471	1508	9104;9105;9106;9107;9108	13334;13335;13336;13337;13338;13339	13339	842		6	0	7918800	0	19847000	0	0	22877000	49130000	25131000
1356	TMNASLAQQLCR	PFTVLVPSVSSFSSRTMNASLAQQLCRQHI	SSRTMNASLAQQLCRQHIIAGQHILEDTRT	R	T	M	C	R	Q	12	0	1391.66	Q0PNF2;Q9NY15	Q0PNF2	411	422	STAB1	Stabilin-1	yes	no	2	1.6909e-05	166.69	0	0	0	19341000	0	0	0	0	0	576	1509	9109;9110	13340;13341;13342;13343	13342	1084		4	0	0	0	9427200	0	0	0	0	0
1358	TMVFPVMYLNESVHIDK	YVKKLDDFVETGDIRTMVFPVMYLNESVHI	VFPVMYLNESVHIDKETASRLKSMINTTLI	R	T	M	D	K	E	17	0	2022	A0A1W2PQR6;A0A1W2PQB7;A0A1W2PS43;A0A024RDG6;A0A1W2PRS1;Q14108;A0A1W2PRF6;A0A1W2PPU6;A0A1W2PPX6;A0A1W2PQL5	A0A1W2PQR6	403	419	SCARB2	Lysosome membrane protein 2	yes	no	2;3	7.1014e-08	130.27	0	0	0	78807000	66231000	84133000	61624000	400990000	0	102	1511;1512;1513	9112;9113;9114;9115;9116;9117;9118;9119;9120;9121;9122	13345;13346;13347;13348;13349;13350;13351;13352;13353;13354;13355;13356;13357;13358;13359;13360	13357	226	16;17	16	0	0	0	38413000	80723000	72402000	7961300	31338000	0
1359	TNEQVVEVCTNTSSPHAGLFPK	NVFVVSVFAEAFFGKTNEQVVEVCTNTSSP	VCTNTSSPHAGLFPKDNSTLAVDIYKGGVV	K	T	N	P	K	D	22	0	2414.15	A0A2R8Y5Q7;B3KY44;F8W1P7;B7Z9M2;A0A0X8GKR4;A0A2R8YD71;P49281	A0A2R8Y5Q7	183	204	SLC11A2	Natural resistance-associated macrophage protein 2	yes	no	3	0.012307	55.127	0	0	0	0	0	0	0	0	0	190	1514	9123	13361	13361	364		1	0	0	0	0	0	0	0	0	0
1360	TNESVSEPR	SVTSKSRVSRLAGRKTNESVSEPRKGFMYS	RLAGRKTNESVSEPRKGFMYSRNTNENPQE	K	T	N	P	R	K	9	0	1017.47	Q13433	Q13433	240	248	SLC39A6	Zinc transporter ZIP6	yes	yes	2	0.00012021	125.82	0	0	0	0	0	0	0	0	0	579	1515	9124	13362	13362	1088		1	0	0	0	0	0	0	0	0	0
1363	TNITLVCKPGDLESAPVLR	SYSDGDDCGHGKKIKTNITLVCKPGDLESA	LVCKPGDLESAPVLRTSGEGGCFYEFEWHT	K	T	N	L	R	T	19	0	2082.11	Q59EZ3;P11717	Q59EZ3	503	521	IGF2R	Cation-independent mannose-6-phosphate receptor	yes	no	3	2.314e-29	175.21	0	0	0	0	0	0	29901000	110080000	0	541	1518	9128;9129	13366;13367	13367	976		2	0	0	0	0	0	0	3862900	8602700	0
1364	TNSTFVQALVEHVK	QDCIRMVTDIQTAVRTNSTFVQALVEHVKE	RTNSTFVQALVEHVKEECDRLGPGMADICK	R	T	N	V	K	E	14	0	1571.83	Q53FJ5;A0A024QZQ2;C9JIZ6;B4DRB7;Q59EN5;P07602;B4DEK5;A0A0J9YXB8	Q53FJ5	214	227	PSAP	Prosaposin;Saposin-A;Saposin-B-Val;Saposin-B;Saposin-C;Saposin-D	yes	no	3	4.1211e-34	210.34	0	0	0	24541000	32720000	19322000	0	434850000	321810000	11	1519	9130;9131;9132;9133;9134;9135	13368;13369;13370;13371;13372;13373	13371	16		6	0	0	0	11962000	39880000	16628000	0	33984000	34925000
1369	TPMTNSSIQFLDNAFR	NIHGTNKHWLIRQAKTPMTNSSIQFLDNAF	PMTNSSIQFLDNAFRKRWQTLLSVDDLVEK	K	T	P	F	R	K	16	0	1840.88	H0YFA9;B4DTT0;Q7Z3X3;H7C3P4;A8K6V6;A0A024RBC5;F6S8M0;B4E284;P15586;F5H4C6	H0YFA9	95	110	GNS;DKFZp686E12166	N-acetylglucosamine-6-sulfatase	yes	no	2	0.0016584	88.075	0	0	0	5946700	0	0	0	0	0	97	1524	9163	13409	13409	211		1	0	0	0	2898600	0	0	0	0	0
1372	TQDEILFSNSTR	LNSADEIYELRVTGRTQDEILFSNSTRLSF	TGRTQDEILFSNSTRLSFETKRISVFIQTD	R	T	Q	T	R	L	12	0	1409.68	Q6YHK3	Q6YHK3	110	121	CD109	CD109 antigen	yes	yes	2	6.5504e-229	330.41	98508000	104170000	92846000	418230000	172430000	257560000	1744800000	3198700000	1689800000	619	1527	9167;9168;9169;9170;9171;9172;9173;9174;9175;9176;9177;9178;9179;9180;9181;9182	13413;13414;13415;13416;13417;13418;13419;13420;13421;13422;13423;13424;13425;13426;13427;13428;13429;13430;13431;13432;13433;13434;13435;13436;13437;13438;13439	13438	1164		26	98508000	88000000	99550000	203860000	210160000	221650000	225410000	249980000	183380000
1374	TSNISKPGTLER	CRTLGDQLSLLLGARTSNISKPGTLERGDQ	GARTSNISKPGTLERGDQTRSGQWRIYGSE	R	T	S	E	R	G	12	0	1301.69	Q9UBG0	Q9UBG0	138	149	MRC2	C-type mannose receptor 2	yes	yes	2;3	3.672e-06	179.94	0	0	0	117960000	37822000	68716000	135430000	776870000	120260000	665	1529	9184;9185;9186;9187;9188;9189;9190;9191	13441;13442;13443;13444;13445;13446;13447;13448;13449;13450	13449	1243		9	0	0	0	57496000	46098000	59135000	17496000	60714000	13051000
1375	TSNSSQVSNEQDK	MLQDKLKVPESENNKTSNSSQVSNEQDKID	NKTSNSSQVSNEQDKIDAYKLLKKEMTLDL	K	T	S	D	K	I	13	0	1422.62	Q5JRA6	Q5JRA6	248	260	MIA3	Melanoma inhibitory activity protein 3	yes	yes	2	1.0654e-08	174.77	0	0	0	4839500	0	0	0	0	0	597	1530	9192	13451	13451	1118		1	0	0	0	2358900	0	0	0	0	0
1376	TTGLDMSEYNSEIPVVNLK	QVKQQTDKSSDCITKTTGLDMSEYNSEIPV	DMSEYNSEIPVVNLKTSTHQKTPVCSIDGS	K	T	T	L	K	T	19	0	2109.03	B7Z3E3;B7Z8W8;O95197	B7Z3E3	250	268	RTN3	Reticulon;Reticulon-3	yes	no	2	0.015345	65.395	0	0	0	0	0	0	0	65084000	0	418	1531	9193	13452	13452	750;751	81	1	0	0	0	0	0	0	0	5086400	0
[truncated: 237 more rows]
