# Supplementary material for: Identification of N-Glycoproteins of Knee Cartilage from Adult Osteoarthritis and Kashin-Beck Disease Based on Quantitative Glycoproteomics, Compared with Normal Control Cartilage
Source: Cells. 2022 Aug 12;11(16):2513. doi: 10.3390/cells11162513 (PMC9406367; doi:10.3390/cells11162513)
Supplement: Supplementary file 1 [file cells-11-02513-s001.zip › Tabel S6 N-GlycoSite-Identification-list.xlsx]

## Sheet: Deamidation 18O (N)Sites
ID	Protein	Protein names	Gene names	Leading proteins	Localization prob	Score diff	PEP	Score	Delta score	Score for localization	Localization prob CK1	Score diff CK1	PEP CK1	Score CK1	Localization prob CK2	Score diff CK2	PEP CK2	Score CK2	Localization prob CK3	Score diff CK3	PEP CK3	Score CK3	Localization prob KBD1	Score diff KBD1	PEP KBD1	Score KBD1	Localization prob KBD2	Score diff KBD2	PEP KBD2	Score KBD2	Localization prob KBD3	Score diff KBD3	PEP KBD3	Score KBD3	Localization prob OA1	Score diff OA1	PEP OA1	Score OA1	Localization prob OA2	Score diff OA2	PEP OA2	Score OA2	Localization prob OA3	Score diff OA3	PEP OA3	Score OA3	Amino acid	Sequence window	Modification window
0	H8WV86	MHC class II antigen (Fragment)	HLA-DRB1	H8WV86	1	102.085	0.000453297	102.08	83.3	102.08													1	102.085	0.000453297	102.08																					N	__RFLEYSTSECHFFNGTERVRFLERYFHNQ	X;X;X;X;X;X;X;X;X;X;X;X;X;X;X;Deamidation 18O (N);X;X;X;X;X;X;X;X;X;X;X;X;X;X;X
1	A0T4C3	Truncated MHC class II antigen (Fragment)	HLA-DRB1	A0T4C3	1	116.026	3.1252e-26	220.81	206.02	116.03													1	169.993	3.1252e-26	220.81					1	116.026	0.00045474	116.03													N	__RFLEQVKHECHFFNGTERVRFLDRAGAVP	X;X;X;X;X;X;X;X;X;X;X;X;X;X;X;Deamidation 18O (N);X;X;X;X;X;X;X;X;X;X;X;X;X;X;X
2	A0A180H6N8	MHC class II antigen (Fragment)	HLA-DRB4	A0A180H6N8	1	92.9251	0.0023701	92.925	84.412	92.925													1	92.9251	0.0023701	92.925																					N	__RFLEQAKCECHFLNGTERVWNLIRYIYNQ	X;X;X;X;X;X;X;X;X;X;X;X;X;X;X;Deamidation 18O (N);X;X;X;X;X;X;X;X;X;X;X;X;X;X;X
3	Q31639	DRB1 transplantation antigen (Fragment)	HLA-DRB1	Q31639	1	44.2994	0.00227012	99.5	83.744	44.299													1	99.4999	0.00227012	99.5	1	44.2994	0.0165628	67.385																	N	__RFLKQDKFECHFFNGTERVRYLHRGIYNQ	X;X;X;X;X;X;X;X;X;X;X;X;X;X;X;Deamidation 18O (N);X;X;X;X;X;X;X;X;X;X;X;X;X;X;X
4	Q2HQJ5	MHC class I antigen (Fragment)	HLA-A	Q2HQJ5	1	180.479	6.26325e-228	322.58	23.397	180.48	1	100.454	0.00111329	100.45					1	106.525	0.000718427	106.52	1	322.58	6.26325e-228	322.58	1	140.308	2.86227e-08	140.31	1	123.384	2.7526e-05	123.38	1	138.767	4.87019e-08	138.77					1	180.479	3.91633e-15	180.48	N	SQTHRVDLGTLRGYYNQSEAGSHTVQRMYGC	X;X;X;X;X;X;X;X;X;X;X;X;X;X;X;Deamidation 18O (N);X;X;X;X;X;X;X;X;X;X;X;X;X;X;X
5	Q5TB53	Transmembrane 9 superfamily member (Fragment)	TM9SF3	Q5TB53	1	118.712	2.69177e-05	156.83	119.28	118.71	1	67.7257	0.0451295	67.726	1	102.062	0.00477044	102.06					1	144.65	3.28553e-05	144.65					1	107.205	0.00589802	107.21	1	147.754	2.69177e-05	147.75	1	156.827	2.74417e-05	156.83	1	118.712	0.00071546	118.71	N	KKLEIGFNGNRIVDVNLTSEGKVKLVPNTKI	X;X;X;X;X;X;X;X;X;X;X;X;X;X;X;Deamidation 18O (N);X;X;X;X;X;X;X;X;X;X;X;X;X;X;X
6	Q9P073	HSPC309 (Fragment)		Q9P073	1	93.6488	0.00450092	108.98	70.739	93.649													1	108.977	0.00450092	108.98									1	82.645	0.0230412	82.645	1	93.6488	0.0094177	93.649					N	AGVGIMVYNVDSKTYNASVLPVRVEVDMVRV	X;X;X;X;X;X;X;X;X;X;X;X;X;X;X;Deamidation 18O (N);X;X;X;X;X;X;X;X;X;X;X;X;X;X;X
7	K7ES70	Microfibril-associated glycoprotein 4	MFAP4	K7ES70	1	93.1624	6.52713e-13	210.1	176.36	93.162	1	175.376	0.00278321	175.38	1	210.095	6.52713e-13	210.1	1	178.831	0.00210187	178.83	1	187	0.00036673	187	1	99.8021	0.0155903	99.802	1	126.412	0.00194293	126.41	1	148.987	0.00228173	148.99					1	93.1624	0.0194119	93.162	N	MTTEGGKWTVFQKRFNGSVSFFRGWNDYKLG	X;X;X;X;X;X;X;X;X;X;X;X;X;X;X;Deamidation 18O (N);X;X;X;X;X;X;X;X;X;X;X;X;X;X;X
8	K7ES70	Microfibril-associated glycoprotein 4	MFAP4	K7ES70	0.966202	14.5618	7.3857e-270	343.61	301.27	188.96					0.966202	14.5618	1.24684e-12	188.96	0.819874	6.5817	7.3857e-270	343.61	0.853241	7.64465	9.54721e-11	186.74					0.862858	7.9877	2.17899e-16	143.97					0.610558	1.95284	1.95072e-65	249.25					N	LKQKYELRVDLEDFENNTAYAKYADFSISPN	X;X;X;X;X;X;X;X;X;X;X;X;X;X;X;Deamidation 18O (N);X;X;X;X;X;X;X;X;X;X;X;X;X;X;X
9	K7ES70	Microfibril-associated glycoprotein 4	MFAP4	K7ES70	0.602389	1.80418	5.31727e-79	259.35	232.46	259.35																									0.578307	1.37162	3.81019e-65	246.08					0.602389	1.80418	5.31727e-79	259.35	N	KQKYELRVDLEDFENNTAYAKYADFSISPNA	X;X;X;X;X;X;X;X;X;X;X;X;X;X;X;Deamidation 18O (N);X;X;X;X;X;X;X;X;X;X;X;X;X;X;X
10	A0A024QZ95	Olfactomedin 4, isoform CRA_a	OLFM4 hCG_29567	A0A024QZ95	1	179.17	3.13142e-82	179.17	153.64	179.17																																	1	179.17	3.13142e-82	179.17	N	SRSLGSGGSVSQLFSNFTGSVDDRGTCQCSV	X;X;X;X;X;X;X;X;X;X;X;X;X;X;X;Deamidation 18O (N);X;X;X;X;X;X;X;X;X;X;X;X;X;X;X
11	M0R122	Epithelial membrane protein 3	EMP3	M0R122	0.736167	4.45648	2.86638e-59	238.87	231.26	238.87													0.736167	4.45648	2.86638e-59	238.87																					N	LPGKESLNLWYDCTWNNDTKTWACSNVSENG	X;X;X;X;X;X;X;X;X;X;X;X;X;X;X;Deamidation 18O (N);X;X;X;X;X;X;X;X;X;X;X;X;X;X;X
12	M0R122	Epithelial membrane protein 3	EMP3	M0R122	0.841664	7.25559	0	304.51	287.49	205.8	0.841664	7.25559	8.60041e-24	205.8	0.84087	7.22975	1.45456e-18	193.81	0.817311	6.50676	1.25102e-72	250.69													0.839766	7.19403	0	304.51	0.702005	3.72131	2.87568e-14	172.86	0.735897	4.45044	3.37628e-18	188.88	N	PGKESLNLWYDCTWNNDTKTWACSNVSENGE	X;X;X;X;X;X;X;X;X;X;X;X;X;X;X;Deamidation 18O (N);X;X;X;X;X;X;X;X;X;X;X;X;X;X;X
13	M0R266	IgG receptor FcRn large subunit p51 (Fragment)	FCGRT	M0R266	1	271.683	2.43637e-299	302.84	270.22	271.68													1	302.839	1.46495e-214	302.84													1	271.683	2.43637e-299	271.68					N	PYTLQGLLGCELGPDNTSVPTAKFALNGEEF	X;X;X;X;X;X;X;X;X;X;X;X;X;X;X;Deamidation 18O (N);X;X;X;X;X;X;X;X;X;X;X;X;X;X;X
14	Q53FJ5	Prosaposin (Variant Gaucher disease and variant metachromatic leukodystrophy) variant (Fragment)		Q53FJ5	1	66.8529	4.29106e-70	240.59	216.74	66.853	1	66.8529	0.00386778	66.853									1	205.801	5.04049e-18	205.8									1	145.833	2.41182e-09	145.83	1	240.594	1.23013e-52	240.59	1	195.769	4.29106e-70	195.77	N	ICKDVVTAAGDMLKDNATEEEILVYLEKTCD	X;X;X;X;X;X;X;X;X;X;X;X;X;X;X;Deamidation 18O (N);X;X;X;X;X;X;X;X;X;X;X;X;X;X;X
15	Q53FJ5	Prosaposin (Variant Gaucher disease and variant metachromatic leukodystrophy) variant (Fragment)		Q53FJ5	1	60.307	0.01314	60.307	52.653	60.307													1	60.307	0.01314	60.307																					N	ILVYLEKTCDWLPKPNMSASCKEIVDSYLPV	X;X;X;X;X;X;X;X;X;X;X;X;X;X;X;Deamidation 18O (N);X;X;X;X;X;X;X;X;X;X;X;X;X;X;X
16	Q53FJ5	Prosaposin (Variant Gaucher disease and variant metachromatic leukodystrophy) variant (Fragment)		Q53FJ5	1	138.726	4.12112e-34	210.34	196.25	138.73													1	143.929	1.19272e-09	143.93	1	88.5614	0.00165387	88.561	1	80.3867	0.00286898	80.387	1	168.495	4.12112e-34	168.5	1	210.336	9.35061e-24	210.34	1	138.726	1.50549e-07	138.73	N	DCIRMVTDIQTAVRTNSTFVQALVEHVKEEC	X;X;X;X;X;X;X;X;X;X;X;X;X;X;X;Deamidation 18O (N);X;X;X;X;X;X;X;X;X;X;X;X;X;X;X
17	A0A024QZU7	Phosphatidic acid phosphatase type 2A, isoform CRA_b	PPAP2A hCG_39580	A0A024QZU7	1	135.098	9.12993e-66	251.03	217.16	135.1													1	86.9106	0.00397836	86.911									1	188.27	7.11231e-12	188.27	1	251.025	9.12993e-66	251.03	1	135.098	6.68511e-07	135.1	N	RPHFLDVCDPDWSKINCSDGYIEYYICRGNA	X;X;X;X;X;X;X;X;X;X;X;X;X;X;X;Deamidation 18O (N);X;X;X;X;X;X;X;X;X;X;X;X;X;X;X
18	H0YAF9	Follistatin (Fragment)	FST	H0YAF9	1	147.561	6.82852e-19	147.56	146.57	147.56													1	147.561	6.82852e-19	147.56																					N	LCPDSKSDEPVCASDNATYASECAMKEAACS	X;X;X;X;X;X;X;X;X;X;X;X;X;X;X;Deamidation 18O (N);X;X;X;X;X;X;X;X;X;X;X;X;X;X;X
19	C9JNZ3	Butyrophilin subfamily 3 member A3 (Fragment)	BTN3A3	C9JNZ3	1	70.389	0.000112501	123.79	92.503	70.389													1	86.3444	0.000112501	123.79									1	101.381	0.00487473	101.38	1	70.389	0.0355856	70.389					N	LRDGITAGKAALRIHNVTASDSGKYLCYFQD	X;X;X;X;X;X;X;X;X;X;X;X;X;X;X;Deamidation 18O (N);X;X;X;X;X;X;X;X;X;X;X;X;X;X;X
20	A0A024R035	Complement component 9, isoform CRA_a	C9 hCG_37544	A0A024R035	1	69.0069	1.09274e-18	139.64	117.44	139.64													0.999083	30.3727	3.60568e-05	102.64													1	69.0069	1.09274e-18	139.64					N	FNKDDCVKRGEGRAVNITSENLIDDVVSLIR	X;X;X;X;X;X;X;X;X;X;X;X;X;X;X;Deamidation 18O (N);X;X;X;X;X;X;X;X;X;X;X;X;X;X;X
21	B4E385	cDNA FLJ52846, highly similar to Homo sapiens matrix-remodelling associated 8 (MXRA8), mRNA		B4E385	1	142.233	2.18977e-16	142.23	128.4	142.23													1	68.369	0.00502347	68.369													1	142.233	2.18977e-16	142.23					N	VAEPHAEPPPRGSPGNGSSHSGAPGPDPTLA	X;X;X;X;X;X;X;X;X;X;X;X;X;X;X;Deamidation 18O (N);X;X;X;X;X;X;X;X;X;X;X;X;X;X;X
22	Q5PY19	Transforming growth factor beta 1 (Fragment)		Q5PY19	0.994863	22.8705	0.00391281	124.34	115.66	122.79													0.992221	21.0569	0.0444746	124.34									0.994863	22.8705	0.00391281	122.79									N	______HVELYQKYSNNSWRYLSNRLLAPSD	X;X;X;X;X;X;X;X;X;X;X;X;X;X;X;Deamidation 18O (N);X;X;X;X;X;X;X;X;X;X;X;X;X;X;X
23	B4DEL6	cDNA FLJ59669, highly similar to Homo sapiens phospholipase D family, member 3 (PLD3), transcript variant 1, mRNA		B4DEL6	1	168.829	1.61794e-05	168.83	136.31	168.83					1	107.831	0.00352671	107.83					1	141.879	3.66941e-05	141.88									1	142.117	1.61794e-05	142.12					1	168.829	2.71501e-05	168.83	N	PSMRAFLLSLAALRDNHTHSDIQVKLFVVPA	X;X;X;X;X;X;X;X;X;X;X;X;X;X;X;Deamidation 18O (N);X;X;X;X;X;X;X;X;X;X;X;X;X;X;X
24	B5MC36	Glutathione hydrolase 1 proenzyme	GGT1	B5MC36	0.999729	35.6621	0.0142874	64.675	44.294	64.675																									0.999729	35.6621	0.0142874	64.675									N	KRAVEEPRLHNQLLPNVTTVERNIDQAVTAA	X;X;X;X;X;X;X;X;X;X;X;X;X;X;X;Deamidation 18O (N);X;X;X;X;X;X;X;X;X;X;X;X;X;X;X
25	B0QY60	SUN domain-containing protein 2 (Fragment)	SUN2	B0QY60	1	115.175	0.00104956	115.18	47.183	115.18					1	87.1843	0.00683207	87.184					1	115.175	0.00104956	115.18																					N	PTAVTLEHVPKALSPNSTISSAPKDFAIFGF	X;X;X;X;X;X;X;X;X;X;X;X;X;X;X;Deamidation 18O (N);X;X;X;X;X;X;X;X;X;X;X;X;X;X;X
26	Q6ZME7	Peptidylprolyl isomerase (EC 5.2.1.8)		Q6ZME7	1	61.1666	0.00307242	74.12	49.184	61.167													1	74.1196	0.00307242	74.12									1	55.5888	0.0144398	55.589	1	61.1666	0.00848064	61.167					N	ERRRITIPPHLAYGENGTGDKIPGSAVLIFN	X;X;X;X;X;X;X;X;X;X;X;X;X;X;X;Deamidation 18O (N);X;X;X;X;X;X;X;X;X;X;X;X;X;X;X
27	Q6ZME7	Peptidylprolyl isomerase (EC 5.2.1.8)		Q6ZME7	1	114.742	4.18832e-09	169.23	112.82	114.74													1	83.6332	0.0023118	83.633									1	71.3439	0.0073863	71.344	1	169.227	4.18832e-09	169.23	1	114.742	0.000272935	114.74	N	DVVEIRTLSRPSETCNETTKLGDFVRYHYNC	X;X;X;X;X;X;X;X;X;X;X;X;X;X;X;Deamidation 18O (N);X;X;X;X;X;X;X;X;X;X;X;X;X;Deamidation 18O (N);X
28	Q6ZME7	Peptidylprolyl isomerase (EC 5.2.1.8)		Q6ZME7	1	241.546	0	342.85	334.98	263.01	1	98.2624	2.21522e-08	99.987	1	157.37	9.58396e-46	158.06					1	236.967	2.48821e-118	238.73	1	125.157	4.5536e-19	126.88	1	223.587	2.35911e-105	225.44	1	206.052	8.0493e-85	207.9	1	185.317	0	342.85	1	241.546	2.52449e-162	263.01	N	CNETTKLGDFVRYHYNCSLLDGTQLFTSHDY	X;Deamidation 18O (N);X;X;X;X;X;X;X;X;X;X;X;X;X;Deamidation 18O (N);X;X;X;X;X;X;X;X;X;X;X;X;X;X;X
29	Q6ZME7	Peptidylprolyl isomerase (EC 5.2.1.8)		Q6ZME7	1	92.6707	0	403.17	388.49	92.671	1	131.306	5.55205e-12	131.31	1	133.948	3.59273e-14	133.95	1	138.75	1.57614e-14	138.75	1	85.9738	4.23537e-111	234.67	1	120.311	1.69202e-08	120.31	1	56.9005	3.07624e-14	135.18	1	92.6707	4.79283e-46	207.56	1	361.52	0	361.52	1	50.8699	0	403.17	N	CVRRAGAGDFMRYHYNGSLMDGTLFDSSYSR	X;X;X;X;X;X;X;X;X;X;X;X;X;X;X;Deamidation 18O (N);X;X;X;Oxidation (M);X;X;X;X;X;X;X;X;X;X;X
30	Q6ZME7	Peptidylprolyl isomerase (EC 5.2.1.8)		Q6ZME7	1	96.2296	1.82733e-12	202.56	180	96.23					1	112.644	0.000980995	112.64	1	70.5404	0.0232637	70.54	1	135.938	1.82733e-12	202.56	1	77.5969	4.24689e-08	190.86	1	105.17	0.00304446	105.17	1	88.0206	7.48095e-06	183.03	1	75.89	0.000111686	167.09	1	96.2296	0.00225783	96.23	N	CPREVQMGDFVRYHYNGTFEDGKKFDSSYDR	X;X;X;X;X;X;X;X;X;X;X;X;X;X;X;Deamidation 18O (N);X;X;X;X;X;X;X;X;X;X;X;X;X;X;X
31	Q6ZME7	Peptidylprolyl isomerase (EC 5.2.1.8)		Q6ZME7	1	187.394	0	454.32	432.09	187.39	1	90.4441	7.85437e-12	130.46	1	159.802	7.15774e-26	159.8	1	109.892	1.69504e-05	109.89	1	131.666	2.62336e-29	174.65	1	120.311	1.69202e-08	120.31	1	250.308	1.36124e-90	250.31	1	234.67	4.23537e-111	234.67	1	118.127	0	454.32	1	187.394	1.20447e-31	187.39	N	CPRMVQDGDFVRYHYNGTLLDGTSFDTSYSK	X;X;X;X;X;X;X;X;X;X;X;X;X;X;X;Deamidation 18O (N);X;X;X;X;X;X;X;X;X;X;X;X;X;X;X
32	A0A024R1Y9	Contactin associated protein 1, isoform CRA_a	CNTNAP1 hCG_16945	A0A024R1Y9	1	128.484	0.000835826	128.48	57.125	128.48																									1	128.484	0.000835826	128.48									N	GPYCQWRRPYVRVELNTSRDVVFAFDVGNGD	X;X;X;X;X;X;X;X;X;X;X;X;X;X;X;Deamidation 18O (N);X;X;X;X;X;X;X;X;X;X;X;X;X;X;X
33	S5MD53	Neurotrophic tyrosine receptor kinase type 2 (Fragment)		S5MD53	1	64.7982	8.20531e-05	126.09	106.35	64.798													1	126.086	8.20531e-05	126.09	1	62.1618	0.0230957	62.162									1	64.7982	0.0195313	64.798					N	PNMYWDVGNLVSKHMNETSHTQGSLRITNIS	X;X;X;X;X;X;X;X;X;X;X;X;X;X;X;Deamidation 18O (N);X;X;X;X;X;X;X;X;X;X;X;X;Deamidation 18O (N);X;X
34	S5MD53	Neurotrophic tyrosine receptor kinase type 2 (Fragment)		S5MD53	1	123.625	3.14589e-05	159.4	104.85	123.63													1	104.221	0.00443955	104.22									1	159.404	3.14589e-05	159.4	1	159.404	3.14589e-05	159.4	1	123.625	0.000132345	123.63	N	HMNETSHTQGSLRITNISSDDSGKQISCVAE	X;X;Deamidation 18O (N);X;X;X;X;X;X;X;X;X;X;X;X;Deamidation 18O (N);X;X;X;X;X;X;X;X;X;X;X;X;X;X;X
35	Q9HBQ7	Cathepsin L, isoform CRA_b	CTSL hCG_30369	Q9HBQ7	1	119.386	2.9255e-09	162.93	121.05	119.39	1	85.5541	0.00450786	85.554					1	119.386	0.000341567	119.39	1	162.925	2.9255e-09	162.93									1	94.1915	0.00375396	94.191					1	119.386	0.000341543	119.39	N	ATEESCKYNPKYSVANDTGFVDIPKQEKALM	X;X;X;X;X;X;X;X;X;X;X;X;X;X;X;Deamidation 18O (N);X;X;X;X;X;X;X;X;X;X;X;X;X;X;X
36	B1APY4	Receptor tyrosine kinase-like orphan receptor 2, isoform CRA_b (Tyrosine-protein kinase transmembrane receptor ROR2)	ROR2 hCG_1985325	B1APY4	1	65.0429	0.0193153	65.043	59.866	65.043													1	65.0429	0.0193153	65.043																					N	IGIPAERLGRYHQCYNGSGMDYRGTASTTKS	X;X;X;X;X;X;X;X;X;X;X;X;X;X;X;Deamidation 18O (N);X;X;X;X;X;X;X;X;X;X;X;X;X;X;X
37	K7EQG0	GPI ethanolamine phosphate transferase 1 (Fragment)	PIGN	K7EQG0	1	113.741	1.42282e-05	122.55	97.161	122.55																													1	113.741	1.42282e-05	122.55					N	AKGWKENPVEFDSLFNESKYTWSWGS_____	X;X;X;X;X;X;X;X;X;X;X;X;X;X;X;Deamidation 18O (N);X;X;X;X;X;X;X;X;X;X;X;X;X;X;X
38	Q8N9Q8	cDNA FLJ36731 fis, clone UTERU2012703, highly similar to LAMININ BETA-2 CHAIN		Q8N9Q8	1	132.075	1.14752e-12	133.16	86.204	133.16													1	132.075	1.14752e-12	133.16									1	83.0509	8.15513e-06	85.837	1	98.778	1.97657e-07	103.76					N	IRHAHSQSAEAERRANTSALAVPSPVSNSAS	X;X;X;X;X;X;X;X;X;X;X;X;X;X;X;Deamidation 18O (N);X;X;X;X;X;X;X;X;X;X;X;X;X;X;X
39	Q8N9Q8	cDNA FLJ36731 fis, clone UTERU2012703, highly similar to LAMININ BETA-2 CHAIN		Q8N9Q8	1	147.156	1.57202e-11	147.16	80.163	147.16																									1	120.621	0.00617922	120.62	1	147.156	1.57202e-11	147.16					N	ANHALSGLERDRLALNLTLRQLDQHLDLLKH	X;X;X;X;X;X;X;X;X;X;X;X;X;X;X;Deamidation 18O (N);X;X;X;X;X;X;X;X;X;X;X;X;X;X;X
40	A0A024R3C4	KDEL (Lys-Asp-Glu-Leu) containing 2, isoform CRA_a	KDELC2 hCG_39502	A0A024R3C4	1	81.3778	7.11496e-157	289.71	234.65	289.71	0.999462	32.6922	6.34659e-31	215.72	0.99948	32.8338	1.59468e-37	218.01					1	81.3778	7.11496e-157	289.71	0.998716	28.9099	2.43828e-18	191.29													0.987284	18.901	0.00320372	80.245	N	PVRYFYLQAVNSEGQNLTRSPAGETPFKVVV	X;X;X;X;X;X;X;X;X;X;X;X;X;X;X;Deamidation 18O (N);X;X;X;X;X;X;X;X;X;X;X;X;X;X;X
41	A0A024R3J7	HCG2032701, isoform CRA_a	hCG_2032701	A0A024R3J7	0.962823	14.1999	0.00830573	68.481	57.996	68.481																					0.85207	7.63632	0.0266859	49.049	0.962823	14.1999	0.00830573	68.481									N	GYQITAMANRTILVDNNTWNNTHISRVGQAM	X;X;X;X;X;X;X;X;X;X;X;X;X;X;X;Deamidation 18O (N);X;X;X;Deamidation 18O (N);X;X;X;X;X;X;X;X;X;X;X
42	A0A024R3J7	HCG2032701, isoform CRA_a	hCG_2032701	A0A024R3J7	0.999944	42.677	2.07412e-263	302.15	245.93	302.15	0.895107	9.7972	2.10819e-12	149.44	0.912868	10.2037	1.90487e-16	186.95	0.910562	10.0795	1.02776e-14	174.17	0.999944	42.677	2.07412e-263	302.15					0.882646	9.31411	3.27683e-05	115.5	0.813433	6.4253	0.00830573	68.481	0.909195	10.0084	1.47761e-14	171.67	0.908385	10.0084	1.47761e-14	171.67	N	TAMANRTILVDNNTWNNTHISRVGQAMASTE	X;X;X;X;X;X;X;X;X;X;X;Deamidation 18O (N);X;X;X;Deamidation 18O (N);X;X;X;X;X;X;X;X;X;X;X;X;X;X;X
43	A0A024R3J7	HCG2032701, isoform CRA_a	hCG_2032701	A0A024R3J7	0.647812	2.64674	1.90487e-16	186.95	151.31	186.95																									0.647812	2.64674	1.90487e-16	186.95									N	AMANRTILVDNNTWNNTHISRVGQAMASTEE	X;X;X;X;X;X;X;X;X;X;X;X;X;X;X;Deamidation 18O (N);X;X;X;X;X;X;X;X;X;X;X;X;X;X;X
44	H0Y7Y8	AT-rich interactive domain-containing protein 4B (Fragment)	ARID4B	H0Y7Y8	0.687764	3.42956	0.00352731	134.66	43.678	122.5	0.5	0	0.00643153	120.52	0.5	0	0.0176248	102.77	0.5	0	0.0100808	113.1	0.5	0	0.00352731	134.66	0.5	0	0.0336747	78.178	0.5	0	0.0148555	115.46	0.5	0	0.00638481	120.65	0.5	0	0.00473	126.2	0.687764	3.42956	0.00568392	122.5	N	MDNNGKEESKIDHLTNNRNDLISKEEQNSSS	X;X;X;X;X;X;X;X;X;X;X;X;X;X;X;Deamidation 18O (N);X;X;X;X;X;X;X;X;X;X;X;X;X;X;X
45	H0Y7Y8	AT-rich interactive domain-containing protein 4B (Fragment)	ARID4B	H0Y7Y8	0.890845	9.11759	0.00352731	134.66	43.678	134.12	0.5	0	0.00643153	120.52	0.825728	6.75608	0.00638481	120.65	0.888814	9.02759	0.00473	126.2	0.5	0	0.00352731	134.66	0.850896	7.56389	0.0123728	110.34	0.5	0	0.0148555	115.46	0.890845	9.11759	0.00354976	134.12	0.847805	7.45894	0.00473	126.2	0.864866	8.06183	0.0100808	113.1	N	DNNGKEESKIDHLTNNRNDLISKEEQNSSSL	X;X;X;X;X;X;X;X;X;X;X;X;X;X;X;Deamidation 18O (N);X;X;X;X;X;X;X;X;X;X;X;X;X;X;X
46	C9JN98	Glia-derived nexin (Fragment)	SERPINE2	C9JN98	1	208.556	1.68631e-18	208.56	189.24	208.56	1	171.616	1.76815e-05	171.62	1	166.692	1.69094e-05	166.69	1	193.965	7.08364e-09	193.96													1	142.068	1.61542e-10	142.07	1	167.596	1.78999e-05	167.6	1	208.556	1.68631e-18	208.56	N	KNKDIVTVANAVFVKNASEIEVPFVTRNKDV	X;X;X;X;X;X;X;X;X;X;X;X;X;X;X;Deamidation 18O (N);X;X;X;X;X;X;X;X;X;X;X;X;X;X;X
47	A0A024R462	Fibronectin 1, isoform CRA_n	FN1 hCG_1813428	A0A024R462;Q6MZM7	1	88.6835	1.17199e-18	88.683	80.209	88.683					1	88.6835	1.17199e-18	88.683																													N	GVFTTLQPGSSIPPYNTEVTETTIVITWTPA	X;X;X;X;X;X;X;X;X;X;X;X;X;X;X;Deamidation 18O (N);X;X;X;X;X;X;X;X;X;X;X;X;X;X;X
48	A0A024R462	Fibronectin 1, isoform CRA_n	FN1 hCG_1813428	A0A024R462;Q6MZM7	1	44.5954	1.52728e-39	186.39	161.37	44.595					1	61.6835	0.00025659	84.759	0.5	0	9.10795e-08	126.48													1	74.7436	0.00100653	74.744	0.546937	0.817783	1.52728e-39	186.39	1	44.5954	0.0233833	44.595	N	YSQLRDQCIVDDITYNVNDTFHKRHEEGHML	X;X;X;X;X;X;X;X;X;X;X;X;X;X;X;Deamidation 18O (N);X;Deamidation 18O (N);X;X;X;X;X;X;X;X;X;X;X;Oxidation (M);X
49	A0A024R462	Fibronectin 1, isoform CRA_n	FN1 hCG_1813428	A0A024R462;Q6MZM7	1	44.5954	0	392.71	359.48	44.595	0.999946	42.686	0	384.53	1	61.6835	0	392.71	0.998707	28.8778	2.43975e-68	242.09	0.992926	21.4728	1.03261e-67	237.81	0.994774	22.7955	7.39118e-13	136.43	0.921029	10.668	1.35749e-68	242.67	1	74.7436	0	370.76	0.999648	34.5293	2.80664e-240	325.2	1	44.5954	0	355.89	N	QLRDQCIVDDITYNVNDTFHKRHEEGHMLNC	X;X;X;X;X;X;X;X;X;X;X;X;X;Deamidation 18O (N);X;Deamidation 18O (N);X;X;X;X;X;X;X;X;X;X;X;Oxidation (M);X;Deamidation 18O (N);X
50	A0A024R462	Fibronectin 1, isoform CRA_n	FN1 hCG_1813428	A0A024R462;Q6MZM7	1	115.978	2.02335e-58	192.18	172.6	115.98	1	66.1196	0.00328433	66.12	1	113.253	8.68371e-10	113.25	1	192.178	2.02335e-58	192.18	1	68.5672	0.00173197	68.567	1	77.0782	0.00119769	77.078	1	66.0043	0.00372643	66.004	1	103.851	4.41018e-08	103.85	1	75.5496	1.48191e-07	98.165	1	115.978	1.68097e-11	115.98	N	KPLTAQQTTKLDAPTNLQFVNETDSTVLVRW	X;X;X;X;X;X;X;X;X;X;X;X;X;X;X;Deamidation 18O (N);X;X;X;X;Deamidation 18O (N);X;X;X;X;X;X;X;X;X;X
51	A0A024R462	Fibronectin 1, isoform CRA_n	FN1 hCG_1813428	A0A024R462;Q6MZM7	1	115.978	0	357.92	310.88	115.98	1	66.1196	1.27702e-251	319.91	1	113.253	1.52433e-251	318.74	1	192.178	0	335.22	1	68.5672	0	357.92	1	77.0782	4.58596e-65	228.03	1	66.0043	1.75489e-225	312.78	1	103.851	0	326.19	1	75.5496	0	351.03	1	115.978	4.5182e-258	264.92	N	QQTTKLDAPTNLQFVNETDSTVLVRWTPPRA	X;X;X;X;X;X;X;X;X;X;Deamidation 18O (N);X;X;X;X;Deamidation 18O (N);X;X;X;X;X;X;X;X;X;X;X;X;X;X;X
52	A0A024R462	Fibronectin 1, isoform CRA_n	FN1 hCG_1813428	A0A024R462;Q6MZM7	0.562784	1.10245	8.39432e-09	79.388	71.723	79.388	0.562784	1.10245	8.39432e-09	79.388																													0.500575	0	2.88985e-06	70.107	N	SFCTDHTVLVQTRGGNSNGALCHFPFLYNNH	X;X;X;X;X;X;X;X;X;X;X;X;X;X;X;Deamidation 18O (N);X;X;X;X;X;X;X;X;X;X;X;X;Deamidation 18O (N);X;X
53	A0A024R462	Fibronectin 1, isoform CRA_n	FN1 hCG_1813428	A0A024R462;Q6MZM7	0.500575	0	2.88985e-06	70.107	64.563	70.107																																	0.500575	0	2.88985e-06	70.107	N	CTDHTVLVQTRGGNSNGALCHFPFLYNNHNY	X;X;X;X;X;X;X;X;X;X;X;X;X;X;X;X;X;X;X;X;X;X;X;X;X;X;X;X;X;X;X
54	A0A024R462	Fibronectin 1, isoform CRA_n	FN1 hCG_1813428	A0A024R462;Q6MZM7	0.542241	0.679466	2.88985e-06	70.107	64.563	70.107																									0.508939	0	6.38342e-05	62.377					0.542241	0.679466	2.88985e-06	70.107	N	GGNSNGALCHFPFLYNNHNYTDCTSEGRRDN	X;X;Deamidation 18O (N);X;X;X;X;X;X;X;X;X;X;X;X;Deamidation 18O (N);X;X;Deamidation 18O (N);X;X;X;X;X;X;X;X;X;X;X;X
55	A0A024R462	Fibronectin 1, isoform CRA_n	FN1 hCG_1813428	A0A024R462;Q6MZM7	0.508939	0	6.38342e-05	62.377	57.757	62.377																									0.508939	0	6.38342e-05	62.377									N	GNSNGALCHFPFLYNNHNYTDCTSEGRRDNM	X;X;X;X;X;X;X;X;X;X;X;X;X;X;X;X;X;X;X;X;X;X;X;X;X;X;X;X;X;X;X
56	A0A024R462	Fibronectin 1, isoform CRA_n	FN1 hCG_1813428	A0A024R462;Q6MZM7	0.999953	43.403	0	383.82	370.72	299.36	0.965676	15.2015	2.4435e-52	174.86	0.976248	16.7493	3.28659e-91	229.95	0.997215	26.1098	4.00578e-52	171.98	0.999953	43.403	5.89763e-230	299.36	0.947817	15.6024	6.77935e-06	97.441	0.992981	22.3358	2.22354e-11	121.3	0.998288	27.6738	0	383.82	0.984555	18.54	6.29625e-81	224.21	0.991399	21.0082	9.57121e-24	141.75	N	SNGALCHFPFLYNNHNYTDCTSEGRRDNMKW	X;X;X;X;X;X;X;X;X;X;X;X;Deamidation 18O (N);X;X;Deamidation 18O (N);X;X;X;X;X;X;X;X;X;X;X;X;X;X;X
57	A0A024R462	Fibronectin 1, isoform CRA_n	FN1 hCG_1813428	A0A024R462;Q6MZM7	1	103.041	0	442.46	373.11	103.04	1	104.257	5.27333e-86	254.94	1	127.297	0	357.66	1	217.502	3.79077e-73	251.28	1	109.361	1.33911e-59	238.58	1	132.59	1.79992e-48	232.78	1	104.257	1.59172e-157	294	1	198.847	0	442.46	1	57.7883	4.92002e-86	255.39	1	103.041	5.39828e-241	305.98	N	VNDTFHKRHEEGHMLNCTCFGQGRGRWKCDP	X;Deamidation 18O (N);X;X;X;X;X;X;X;X;X;X;X;Oxidation (M);X;Deamidation 18O (N);X;X;X;X;X;X;X;X;X;X;X;X;X;X;X
58	A0A024R462	Fibronectin 1, isoform CRA_n	FN1 hCG_1813428	A0A024R462	1	147.831	0.00337811	154.35	93.389	147.83	1	98.4179	0.0197747	98.418	1	154.35	0.00432811	154.35	1	117.16	0.00770001	117.16	1	134.056	0.0035526	134.06	1	95.5414	0.0210555	95.541	1	116.542	0.00793314	116.54	1	138.242	0.00337811	138.24	1	89.5498	0.0232522	89.55	1	147.831	0.00339386	147.83	N	TCIGAGRGRISCTIANRCHEGGQSYKIGDTW	X;X;X;X;X;X;X;X;X;X;X;X;X;X;X;Deamidation 18O (N);X;X;X;X;X;X;X;X;X;X;X;X;X;X;X
59	A0A024R462	Fibronectin 1, isoform CRA_n	FN1 hCG_1813428	A0A024R462;Q6MZM7;Q6N084	0.999994	52.3818	0.000633731	99.927	71.294	99.927													0.999994	52.3818	0.000633731	99.927																					N	REDRVPHSRNSITLTNLTPGTEYVVSIVALN	X;X;X;X;X;X;X;X;X;X;X;X;X;X;X;Deamidation 18O (N);X;X;X;X;X;X;X;X;X;X;X;X;X;X;X
60	A0A024R462	Fibronectin 1, isoform CRA_n	FN1 hCG_1813428	A0A024R462;Q6MZM7;Q6N084	0.999927	41.36	7.63977e-05	77.372	59.628	72.321																					0.999927	41.36	0.000598445	72.321					0.999572	33.6816	7.63977e-05	77.372					N	NLTPGTEYVVSIVALNGREESPLLIGQQSTV	X;X;X;X;X;X;X;X;X;X;X;X;X;X;X;Deamidation 18O (N);X;X;X;X;X;X;X;X;X;X;X;X;X;X;X
61	C9J4Y6	Glypican-1 (Fragment)	GPC1	C9J4Y6	1	122.306	3.93382e-05	122.31	99.168	122.31	1	53.168	0.0244241	53.168	1	85.6194	0.00126755	85.619	1	86.3775	0.00117291	86.378	1	122.306	3.93382e-05	122.31																					N	ATQLRSFDDHFQHLLNDSERTLQATFPGAFG	X;X;X;X;X;X;X;X;X;X;X;X;X;X;X;Deamidation 18O (N);X;X;X;X;X;X;X;X;X;X;X;X;X;X;X
62	A0A2R8Y6G6	Alpha-enolase	ENO1	A0A2R8Y6G6	0.498375	0	1.71067e-20	101.73	91.732	101.73																													0.498375	0	1.71067e-20	101.73					N	DLAGNSEVILPVPAFNVINGGSHAGNKLAMQ	X;X;X;X;X;X;X;X;X;X;X;X;X;X;X;Deamidation 18O (N);X;X;X;X;X;X;X;X;X;X;X;X;X;X;X
63	A0A2R8Y6G6	Alpha-enolase	ENO1	A0A2R8Y6G6	0.498375	0	1.71067e-20	101.73	91.732	101.73																													0.498375	0	1.71067e-20	101.73					N	GNSEVILPVPAFNVINGGSHAGNKLAMQEFM	X;X;X;X;X;X;X;X;X;X;X;X;X;X;X;X;X;X;X;X;X;X;X;X;X;X;X;X;X;X;X
64	B4DGN8	cDNA FLJ53377, highly similar to Procollagen-lysine, 2-oxoglutarate 5-dioxygenase 1		B4DGN8	1	70.9287	3.95247e-152	236.32	127.3	70.929	1	68.1321	0.00112611	144.77	1	107.563	0.0047145	107.56	1	126.313	0.000401773	126.31	1	236.315	3.95247e-152	236.32	1	47.2879	0.0272283	56.359	1	108.57	0.000622965	179.8	1	83.647	0.0172335	83.647	1	70.9287	0.034889	70.929					N	FYTKIFLDPEKREQINITLDHRCRIFQNLDG	X;X;X;X;X;X;X;X;X;X;X;X;X;X;X;Deamidation 18O (N);X;X;X;X;X;X;X;X;X;X;X;X;X;X;X
65	B4DGN8	cDNA FLJ53377, highly similar to Procollagen-lysine, 2-oxoglutarate 5-dioxygenase 1		B4DGN8	1	102.002	2.51678e-06	198.92	131.93	102	1	58.2299	0.0291288	58.23	1	198.919	2.51678e-06	198.92	1	150.399	0.00348704	150.4	1	180.926	0.0029372	180.93	1	65.1561	0.00760994	117.4	1	133.116	0.00361726	133.12	1	124.08	0.00223739	124.08	1	107.008	0.00507274	166.68	1	102.002	0.00791713	102	N	VFSNPEDWKEKYIHQNYTKALAGKLVETPCP	X;X;X;X;X;X;X;X;X;X;X;X;X;X;X;Deamidation 18O (N);X;X;X;X;X;X;X;X;X;X;X;X;X;X;X
66	E9PJT6	Solute carrier family 43 member 3 (Fragment)	SLC43A3	E9PJT6	1	136.136	1.57262e-54	216.54	194.52	136.14					1	93.4784	0.00238605	93.478	1	58.4867	0.0220731	58.487	1	174.592	3.54098e-29	174.59													1	216.544	1.57262e-54	216.54	1	136.136	2.92128e-22	136.14	N	DYFKDLCGPDAGPIGNATGQADCKAQDERFS	X;X;X;X;X;X;X;X;X;X;X;X;X;X;X;Deamidation 18O (N);X;X;X;X;X;X;X;X;X;X;X;X;X;X;X
67	A0A024R599	Solute carrier family 3 (Activators of dibasic and neutral amino acid transport), member 2, isoform CRA_e	SLC3A2 hCG_2016598	A0A024R599	1	62.9238	1.89529e-13	196.24	156.32	62.924													1	196.239	1.89529e-13	196.24					1	62.9238	0.0374851	62.924													N	IENLKDASSFLAEWQNITKGFSEDRLLIAGT	X;X;X;X;X;X;X;X;X;X;X;X;X;X;X;Deamidation 18O (N);X;X;X;X;X;X;X;X;X;X;X;X;X;X;X
68	A0A024R599	Solute carrier family 3 (Activators of dibasic and neutral amino acid transport), member 2, isoform CRA_e	SLC3A2 hCG_2016598	A0A024R599	0.996053	24.0197	2.11157e-40	229.53	176.95	155													0.993284	21.6995	2.11157e-40	229.53	0.98981	19.8739	9.30158e-09	147.91	0.996053	24.0197	8.34496e-09	155	0.983552	17.7668	0.00834857	84.687	0.993346	21.7402	9.27147e-07	138.76	0.954955	13.2634	0.0250421	72.276	N	GSTGEHTKSLVTQYLNATGNRWCSWSLSQAR	X;X;X;X;X;X;X;X;X;X;X;X;X;X;X;Deamidation 18O (N);X;X;X;X;X;X;X;X;X;X;X;X;X;X;X
69	F5H5R4	Mas-related G-protein-coupled receptor member F	MRGPRF	F5H5R4	1	221.816	2.15441e-191	308	293.79	234.39													1	250.947	1.55255e-109	272.32	1	146.995	6.57921e-09	162.26	1	114.469	0.000120176	124.42	1	221.446	6.08686e-53	242.82	1	279.039	2.15441e-191	308	1	221.816	9.28203e-52	234.39	N	____________MAGNCSWEAHPGNRNKVSA	X;X;X;X;X;X;X;X;X;X;X;X;X;X;X;Deamidation 18O (N);X;X;X;X;X;X;X;X;X;X;X;X;X;X;X
70	E9PKA3	EGF-containing fibulin-like extracellular matrix protein 2 (Fragment)	EFEMP2	E9PKA3	0.646159	2.61531	1.67935e-84	236.35	216.13	209.1					0.5	0	2.16782e-09	157.78	0.62733	2.26171	3.26943e-09	164.64	0.638877	2.47762	1.67935e-84	213.34					0.646159	2.61531	2.1466e-84	209.1	0.5	0	3.43069e-56	180.07	0.5	0	3.08534e-52	236.35					N	GSFRCQCEPGFQLGPNNRSCV__________	X;X;X;X;X;X;X;X;X;X;X;X;X;X;X;Deamidation 18O (N);X;X;X;X;X;X;X;X;X;X;X;X;X;X;X
71	E9PKA3	EGF-containing fibulin-like extracellular matrix protein 2 (Fragment)	EFEMP2	E9PKA3	0.5	0	1.67935e-84	236.35	216.13	236.35					0.5	0	2.16782e-09	157.78					0.5	0	1.67935e-84	204.5					0.5	0	2.1466e-84	203.94	0.5	0	3.43069e-56	180.07	0.5	0	3.08534e-52	236.35					N	SFRCQCEPGFQLGPNNRSCV___________	X;X;X;X;X;X;X;X;X;X;X;X;X;X;X;X;X;X;X;X;X;X;X;X;X;X;X;X;X;X;X
72	H0YD65	Cathepsin F (Fragment)	CTSF	H0YD65	1	153.672	0.00337595	158.03	138.55	158.03	1	142.981	0.00337595	147.34	1	153.222	0.00528762	157.58	1	153.672	0.00542129	158.03	1	116.265	0.00639388	120.62	1	123.487	0.00446605	127.84	1	108.013	0.0106878	112.37					1	153.16	0.00526904	157.52	1	149.37	0.00414264	153.73	N	PVKMASIFKNFVITYNRTYESKEARWRLSVF	X;X;X;X;X;X;X;X;X;X;X;X;X;X;X;Deamidation 18O (N);X;X;X;X;X;X;X;X;X;X;X;X;X;X;X
73	H0YD65	Cathepsin F (Fragment)	CTSF	H0YD65	1	102.724	1.96832e-19	108.57	101.69	108.57																																	1	102.724	1.96832e-19	108.57	N	ETEDDYSYQGHMQSCNFSAEKAKVYINDSVE	X;X;X;X;X;X;X;X;X;X;X;X;X;X;X;Deamidation 18O (N);X;X;X;X;X;X;X;X;X;X;Deamidation 18O (N);X;X;X;X
74	H0YD65	Cathepsin F (Fragment)	CTSF	H0YD65	1	255.152	4.87075e-255	332.53	284.69	332.53	1	195.869	2.88146e-100	263.57	1	206.862	1.56808e-100	266.93	1	222.664	1.34315e-156	294.01	1	207.997	2.10517e-156	291.5									1	163.86	9.72197e-165	240.8	1	255.152	4.87075e-255	332.53	1	150.711	8.90943e-90	206.36	N	MQSCNFSAEKAKVYINDSVELSQNEQKLAAW	X;X;X;X;Deamidation 18O (N);X;X;X;X;X;X;X;X;X;X;Deamidation 18O (N);X;X;X;X;X;X;X;X;X;X;X;X;X;X;X
75	A0A172Q3A8	Folate receptor (Fragment)		A0A172Q3A8	1	72.1498	0.00164958	95.981	90.702	95.981																					1	72.1498	0.00164958	95.981													N	HEQCRPWRKNACCSTNTSQEAHKDVSYLYRF	X;X;X;X;X;X;X;X;X;X;X;X;X;X;X;Deamidation 18O (N);X;X;X;X;X;X;X;X;X;X;X;X;X;X;X
76	A0A172Q3A8	Folate receptor (Fragment)		A0A172Q3A8	1	154.292	0.000329198	154.29	95.741	154.29													1	154.292	0.000329198	154.29																					N	TVLCNEIWTHSYKVSNYSRGSGRCIQMWFDP	X;X;X;X;X;X;X;X;X;X;X;X;X;X;X;Deamidation 18O (N);X;X;X;X;X;X;X;X;X;X;X;X;X;X;X
77	E9PQ34	Serpin H1 (Fragment)	SERPINH1	E9PQ34	1	153.726	0.00301487	180.7	140.61	153.73	1	150.165	0.00347856	150.17	1	101.327	0.0183386	101.33	1	123.451	0.00532601	123.45	1	96.4916	0.00527217	174.52	1	180.704	0.00301487	180.7	1	125.007	0.00492272	125.01	1	153.726	0.00414264	153.73	1	137.179	0.00342243	153.73	1	153.726	0.00414264	153.73	N	EEVHAGLGELLRSLSNSTARNVTWKLGSRLY	X;X;X;X;X;X;X;X;X;X;X;X;X;X;X;Deamidation 18O (N);X;X;X;X;X;X;X;X;X;X;X;X;X;X;X
78	A0A024R5S2	Cancer susceptibility candidate 4, isoform CRA_a	CASC4 hCG_2003796	A0A024R5S2	0.995651	23.597	0.00667028	180.93	92.897	180.93													0.991691	20.7682	0.0214898	146.27					0.746322	4.68643	0.0419142	84.916	0.995651	23.597	0.0189149	180.93	0.993085	21.5722	0.00667028	159.46	0.993085	21.5722	0.037643	159.46	N	QEFLRQEDQLQDYRKNNTYLVKRLEYESKRP	X;X;X;X;X;X;X;X;X;X;X;X;X;X;X;Deamidation 18O (N);X;X;X;X;X;X;X;X;X;X;X;X;X;X;X
79	A0A024R5S2	Cancer susceptibility candidate 4, isoform CRA_a	CASC4 hCG_2003796	A0A024R5S2	0.56307	1.10151	0.000723946	101.53	90.357	101.53													0.5	0	0.034165	44.567													0.56307	1.10151	0.000723946	101.53					N	EGLGKRCEDDKVKLQNNISYQMADIHHLKEQ	X;X;X;X;X;X;X;X;X;X;X;X;X;X;X;Deamidation 18O (N);X;X;X;X;X;X;X;X;X;X;X;X;X;X;X
80	A0AV88	ADAM10 protein	ADAM10	A0AV88	1	110.908	7.27155e-05	122.93	92.873	122.93													1	110.908	7.27155e-05	122.93																					N	SGIRNISFMVKRIRINTTADEKDPTNPFRFP	X;X;X;X;X;X;X;X;X;X;X;X;X;X;X;Deamidation 18O (N);X;X;X;X;X;X;X;X;X;X;X;X;X;X;X
81	A0A024R6E0	SPARC related modular calcium binding 1, isoform CRA_b	SMOC1 hCG_21971	A0A024R6E0	1	69.2664	0.0145071	166.34	60.051	166.34					0.999987	48.7774	0.0462516	164.89	1	69.2664	0.0460656	166.34	0.999988	49.1143	0.0462516	164.89	0.999824	37.5447	0.0214092	139.27									0.999999	61.8749	0.0145071	164.89	0.999993	51.5607	0.0463094	157.99	N	PTLWIKHLVIKDSKLNNTNIRNSEKVYSCDQ	X;X;X;X;X;X;X;X;X;X;X;X;X;X;X;Deamidation 18O (N);X;X;X;X;X;X;X;X;X;X;X;X;X;X;X
82	B2RBZ5	cDNA, FLJ95778, highly similar to Homo sapiens serpin peptidase inhibitor, clade A (alpha-1 antiproteinase, antitrypsin), member 10 (SERPINA10), mRNA		B2RBZ5	1	113.499	0.00975159	113.5	93.653	113.5													1	97.0933	0.0204285	97.093									1	86.8328	0.024667	86.833	1	101.327	0.0183386	101.33	1	113.499	0.00975159	113.5	N	FAFIHKDFDVKETFFNLSKRYFDTECVPMNF	X;X;X;X;X;X;X;X;X;X;X;X;X;X;X;Deamidation 18O (N);X;X;X;X;X;X;X;X;X;X;X;X;X;X;X
83	A0A0G2JRN3	Alpha-1-antitrypsin	SERPINA1	A0A0G2JRN3	0.998815	29.2568	3.18888e-47	160.48	150.2	157.08					0.891458	9.14502	3.18888e-47	160.48	0.998815	29.2568	3.27827e-46	157.08	0.977537	16.3866	8.45549e-27	137.88									0.870561	8.27733	2.07752e-35	144.28									N	TKADTHDEILEGLNFNLTEIPEAQIHEGFQE	X;X;X;X;X;X;X;X;X;X;X;X;X;X;X;Deamidation 18O (N);X;X;X;X;X;X;X;X;X;X;X;X;X;X;X
84	A0A0G2JRN3	Alpha-1-antitrypsin	SERPINA1	A0A0G2JRN3	1	249.752	1.33198e-85	254.18	220.22	249.75	1	123.019	1.19741e-59	241.51	1	200.206	6.11734e-23	200.21	1	208.513	2.79033e-29	208.51	1	254.181	1.33198e-85	254.18	1	124.515	1.148e-05	124.51	1	105.139	5.45705e-06	129.17	1	100.227	1.52624e-47	228.8	1	209.641	2.36357e-29	209.64	1	249.752	1.86877e-72	249.75	N	CKKLSSWVLLMKYLGNATAIFFLPDEGKLQH	X;X;X;X;X;X;X;X;X;X;X;X;X;X;X;Deamidation 18O (N);X;X;X;X;X;X;X;X;X;X;X;X;X;X;X
85	P29622	Kallistatin (Kallikrein inhibitor) (Peptidase inhibitor 4) (PI-4) (Serpin A4)	SERPINA4 KST PI4	P29622	1	99.815	0.00425956	105.4	58.934	99.815	1	72.6431	0.033538	72.643																	1	76.4649	0.02007	76.465	1	96.665	0.00559717	96.665	1	105.396	0.00425956	105.4	1	99.815	0.0051146	99.815	N	FISSRTTPKDFYVDENTTVRVPMMLQDQEHH	X;X;X;X;X;X;X;X;X;X;X;X;X;X;X;Deamidation 18O (N);X;X;X;X;X;X;X;X;X;X;X;X;X;X;X
86	P29622	Kallistatin (Kallikrein inhibitor) (Peptidase inhibitor 4) (PI-4) (Serpin A4)	SERPINA4 KST PI4	P29622	1	103.686	2.91561e-06	181.68	151.12	103.69	1	101.954	0.00501662	101.95	1	81.3376	8.49921e-06	156.71	1	150.457	6.78065e-06	150.46	1	68.5357	2.91561e-06	181.68					1	94.3627	0.0204415	96.015	1	159.944	1.00707e-05	159.94	1	69.8152	0.0374167	69.815	1	103.686	7.6693e-06	155	N	ALFLSHNLKFLAKFLNDTMAVYEAKLFHTNF	X;X;X;X;X;X;X;X;X;X;X;X;X;X;X;Deamidation 18O (N);X;X;Oxidation (M);X;X;X;X;X;X;X;X;X;X;X;X
87	P29622	Kallistatin (Kallikrein inhibitor) (Peptidase inhibitor 4) (PI-4) (Serpin A4)	SERPINA4 KST PI4	P29622	1	212.098	6.41626e-235	282.06	254.38	212.1					1	137.423	4.10901e-15	137.42					1	62.6114	0.00507218	62.611									1	200.349	4.96246e-40	200.35	1	282.063	6.41626e-235	282.06	1	212.098	4.19962e-47	212.1	N	ACSHSRSQILEGLGFNLTELSESDVHRGFQH	X;X;X;X;X;X;X;X;X;X;X;X;X;X;X;Deamidation 18O (N);X;X;X;X;X;X;X;X;X;X;X;X;X;X;X
88	Q86XZ8	CDC42BPB protein (Fragment)	CDC42BPB	Q86XZ8	0.945848	12.4221	0.019913	74.684	42.842	74.684													0.945848	12.4221	0.019913	74.684																					N	EDFKKHAFFEGLNWENIRNLEAPYIPDVSSP	X;X;X;X;X;X;X;X;X;X;X;X;X;X;X;Deamidation 18O (N);X;X;X;X;X;X;X;X;X;X;X;X;X;X;X
89	B4DDH1	cDNA FLJ53503, highly similar to Plasma serine protease inhibitor		B4DDH1	1	191.961	1.2562e-34	191.96	191.96	191.96	1	112.235	3.93278e-05	112.24	1	54.2806	0.0383287	54.281	1	42.3484	0.0308822	42.348	1	71.5274	0.000961803	71.527	1	148.572	1.69205e-19	148.57	1	138.726	6.9473e-15	138.73	1	157.143	3.69976e-31	181.51	1	148.198	2.54438e-25	152.34	1	191.961	1.2562e-34	191.96	N	DRNLSCRVVGVPYQGNATALFILPSEGKMQQ	X;X;X;X;X;X;X;X;X;X;X;X;X;X;X;Deamidation 18O (N);X;X;X;X;X;X;X;X;X;X;X;X;X;X;X
90	A0A024R6P0	Serpin peptidase inhibitor, clade A (Alpha-1 antiproteinase, antitrypsin), member 3, isoform CRA_c	SERPINA3 hCG_2039549	A0A024R6P0	1	421.058	0	421.06	393.09	421.06					1	58.8484	1.62286e-158	239.72	1	242.338	7.45298e-182	242.34	1	207.125	2.95483e-46	207.13	1	192.692	2.68817e-35	196.66	1	111.953	1.92098e-34	191.21	1	180.139	2.21267e-78	242.34	1	409.492	0	409.49	1	421.058	0	421.06	N	AHNTTLTEILKGLKFNLTETSEAEIHQSFQH	X;X;X;X;X;X;X;X;X;X;X;X;X;X;X;Deamidation 18O (N);X;X;X;X;X;X;X;X;X;X;X;X;X;X;X
91	A0A024R6P0	Serpin peptidase inhibitor, clade A (Alpha-1 antiproteinase, antitrypsin), member 3, isoform CRA_c	SERPINA3 hCG_2039549	A0A024R6P0	1	181.096	1.86176e-60	216.83	195.06	216.83	1	113.473	5.05035e-14	133.48	1	186.893	1.4556e-46	213.99					1	181.096	1.51923e-54	216.83													1	145.29	1.86176e-60	172.43					N	EAEIHQSFQHLLRTLNQSSDELQLSMGNAMF	X;X;X;X;X;X;X;X;X;X;X;X;X;X;X;Deamidation 18O (N);X;X;X;X;X;X;X;X;X;Oxidation (M);X;X;X;Oxidation (M);X
92	A0A024R6P0	Serpin peptidase inhibitor, clade A (Alpha-1 antiproteinase, antitrypsin), member 3, isoform CRA_c	SERPINA3 hCG_2039549	A0A024R6P0	1	266.75	1.261e-179	305.67	290.8	266.75					1	305.674	1.261e-179	305.67	1	259.095	4.67962e-86	259.1	1	78.1568	0.00378959	78.157	1	89.3005	0.000282572	89.301	1	188.4	3.5649e-18	188.4	1	204.347	2.22646e-23	204.35	1	228.929	1.4908e-47	228.93	1	266.75	4.40292e-101	266.75	N	DEELSCTVVELKYTGNASALFILPDQDKMEE	X;X;X;X;X;X;X;X;X;X;X;X;X;X;X;Deamidation 18O (N);X;X;X;X;X;X;X;X;X;X;X;X;X;X;X
93	A0A088QF11	Choline transporter-like protein 2 isoform 2	SLC44A2	A0A088QF11	1	137.439	9.47254e-80	193.15	179.56	137.44	1	107.339	8.21975e-07	107.34	1	43.7941	1.11444e-06	114.96					1	63.4596	9.74162e-11	137.44	1	68.5672	0.00270878	68.567	1	82.0066	1.59029e-05	112.89	1	193.15	9.47254e-80	193.15	1	137.439	1.64861e-28	171.09	1	100.525	0.000422269	100.53	N	CFPAIHAYKGVLMVGNETTYEDGHGSRKNIT	X;X;X;X;X;X;X;X;X;X;X;X;Oxidation (M);X;X;Deamidation 18O (N);X;X;X;X;X;X;X;X;X;X;X;X;Deamidation 18O (N);X;X
94	A0A088QF11	Choline transporter-like protein 2 isoform 2	SLC44A2	A0A088QF11	1	104.297	4.9398e-80	261.58	177.09	104.3	1	213.346	1.20963e-17	213.35	1	95.1622	2.12544e-34	231.42	1	163.898	5.64666e-30	197.94	1	84.6051	2.94981e-58	251.43	1	197.939	4.9398e-80	197.94	1	235.065	7.08198e-45	235.06	1	96.6043	2.5575e-72	261.58	1	61.9324	2.48467e-11	197.94	1	104.297	0.00024768	174.77	N	VGNETTYEDGHGSRKNITDLVEGAKKANGVL	X;X;Deamidation 18O (N);X;X;X;X;X;X;X;X;X;X;X;X;Deamidation 18O (N);X;X;X;X;X;X;X;X;X;X;X;X;X;X;X
95	A0A088QF11	Choline transporter-like protein 2 isoform 2	SLC44A2	A0A088QF11	1	192.18	2.18472e-66	252.21	210.21	234.92	1	122.84	3.45827e-09	165.58	1	149.946	9.99899e-13	190.66	1	209.467	2.18472e-66	252.21	1	175.53	1.22811e-17	204.49	1	123.663	2.23902e-09	158.42	1	202.397	1.93445e-52	238.98	1	116.938	1.65961e-16	158.34	1	196.238	1.93445e-52	238.98	1	192.18	3.70737e-52	234.92	N	PFTAKTCNPETFPSSNESRQCPNARCQFAFY	X;X;X;X;X;X;X;X;X;X;X;X;X;X;X;Deamidation 18O (N);X;X;X;X;X;X;X;X;X;X;X;X;X;X;X
96	K7EKF6	Angiopoietin-related protein 6	ANGPTL6	K7EKF6	1	69.0301	0.00140176	107.97	89.632	69.03					1	107.966	0.00140176	107.97	1	105.252	0.00183055	105.25													1	69.0301	0.0155552	69.03									N	CWSGPASTRATPEAANASELAALRMRVGRHE	X;X;X;X;X;X;X;X;X;X;X;X;X;X;X;Deamidation 18O (N);X;X;X;X;X;X;X;X;X;X;X;X;X;X;X
97	K7EKF6	Angiopoietin-related protein 6	ANGPTL6	K7EKF6	1	148.144	0.000910321	148.14	100.4	148.14																									1	107.693	0.00517149	107.69					1	148.144	0.000910321	148.14	N	AEPAAALALLGERVLNASAEAQRAAARFHQL	X;X;X;X;X;X;X;X;X;X;X;X;X;X;X;Deamidation 18O (N);X;X;X;X;X;X;X;X;X;X;X;X;X;X;X
98	A0A024R7B2	Endothelial differentiation, sphingolipid G-protein-coupled receptor, 5, isoform CRA_a	EDG5 hCG_28477	A0A024R7B2	1	70.9287	0.00318516	119.53	72.447	70.929									1	91.0872	0.0204224	91.087	1	119.528	0.00318516	119.53									1	48.6978	0.0388097	48.698	1	42.2105	0.0364537	42.21	1	70.9287	0.0166721	70.929	N	LYSEYLNPNKVQEHYNYTKETLETQETTSRQ	X;X;X;X;X;X;X;X;X;X;X;X;X;X;X;Deamidation 18O (N);X;X;X;X;X;X;X;X;X;X;X;X;X;X;X
99	B4E0Z6	cDNA FLJ59809, highly similar to Bone marrow stromal antigen 2		B4E0Z6	1	94.4606	0.000557394	94.461	76.048	94.461													1	94.4606	0.000557394	94.461																					N	SEACRDGLRAVMECRNVTHLLQQELTEAQKG	X;X;X;X;X;X;X;X;X;X;X;X;X;X;X;Deamidation 18O (N);X;X;X;X;X;X;X;X;X;X;X;X;X;X;X
100	B4DPP4	cDNA FLJ56646, highly similar to Transmembrane emp24 domain-containing protein 9		B4DPP4	1	143.154	5.27942e-35	192.25	179.21	143.15	1	170.526	9.50978e-30	170.53	1	74.0475	0.00342859	74.047	1	97.4885	0.001367	97.488	1	60.8261	5.27942e-35	192.25	1	143.154	2.05771e-19	143.15																	N	FTSHTPGEHQICLHSNSTKFSLFAGGMLVSG	X;X;X;X;X;X;X;X;X;X;X;X;X;X;X;Deamidation 18O (N);X;X;X;X;X;X;X;X;X;X;X;X;X;X;X
101	A0A024R7N5	Kelch-like 26 (Drosophila), isoform CRA_a	KLHL26 hCG_37049	A0A024R7N5	1	69.5982	0.011488	91.041	32.437	69.598					1	57.5984	0.0260793	57.598	1	67.9926	0.0161591	69.954	1	57.5984	0.0260582	57.598					1	57.5896	0.0260675	57.59	1	67.9926	0.0188548	67.993	1	57.5896	0.0188548	67.993	1	69.5982	0.011488	91.041	N	GCCLLERKIYIVGGYNWRLNNVTGIVQVYNT	X;X;X;X;X;X;X;X;X;X;X;X;X;X;X;Deamidation 18O (N);X;X;X;X;X;X;X;X;X;X;X;X;X;X;X
102	A0A024R7W0	Inositol monophosphatase domain containing 1, isoform CRA_a	IMPAD1 hCG_40999	A0A024R7W0	1	218.398	6.31102e-170	287.54	252.79	218.4	1	63.7088	0.0088235	63.709					1	90.3339	5.27101e-39	174.83	1	287.539	6.31102e-170	287.54	1	101.357	1.3715e-11	101.36									1	218.398	1.08674e-65	218.4					N	SHSGMVKQVALQTFGNQTTIIPAGGAGYKVL	X;X;X;X;X;X;X;X;X;X;X;X;X;X;X;Deamidation 18O (N);X;X;X;X;X;X;X;X;X;X;X;X;X;X;X
103	Q7Z2W2	Extracellular sulfatase (EC 3.1.6.-)	DKFZp686F13142	Q7Z2W2	0.999717	35.4771	3.51693e-14	166.04	151.16	166.04													0.999717	35.4771	3.51693e-14	166.04																					N	HGFDYAKDYFTDLITNESINYFKMSKRMYPH	X;X;X;X;X;X;X;X;X;X;X;X;X;X;X;Deamidation 18O (N);X;X;X;X;X;X;X;X;X;X;X;X;X;X;X
104	Q7Z2W2	Extracellular sulfatase (EC 3.1.6.-)	DKFZp686F13142	Q7Z2W2	1	138.242	2.34398e-11	145.04	125.57	138.24	1	83.2061	0.0284067	83.206					1	89.0462	0.0234368	89.046	1	139.28	0.00333487	139.28									1	120.488	0.00640214	120.49	1	145.045	2.34398e-11	145.04	1	138.242	5.07624e-07	138.24	N	GWREWLGLIKNSRFYNYTVCRNGIKEKHGFD	X;X;X;X;X;X;X;X;X;X;X;X;X;X;X;Deamidation 18O (N);X;X;X;X;X;X;X;X;X;X;X;X;X;X;X
105	Q7Z2W2	Extracellular sulfatase (EC 3.1.6.-)	DKFZp686F13142	Q7Z2W2	0.999924	41.5602	0.00466748	68.88	54.267	68.88																													0.999924	41.5602	0.00466748	68.88					N	HGPEDSAPQFSKLYPNASQHITPSYNYAPNM	X;X;X;X;X;X;X;X;X;X;X;X;X;X;X;Deamidation 18O (N);X;X;X;X;X;X;X;X;X;X;X;X;X;X;X
106	Q7Z2W2	Extracellular sulfatase (EC 3.1.6.-)	DKFZp686F13142	Q7Z2W2	0.986232	18.5512	8.2275e-13	200.71	174.27	200.71	0.840908	7.23101	0.000280411	123.75	0.86451	8.04863	0.000195249	125.75	0.904884	9.78341	0.0287681	73.067	0.868043	8.1811	6.69024e-06	150.61									0.980002	16.9025	8.262e-13	200.68	0.986232	18.5512	8.2275e-13	200.71	0.983924	17.8678	2.98098e-06	181.53	N	SWQAMHEPRTFAVYLNNTGYRTVFFGKYLNE	X;X;X;X;X;X;X;X;X;X;X;X;X;X;X;Deamidation 18O (N);X;X;X;X;X;X;X;X;X;X;X;X;X;X;X
107	Q7Z2W2	Extracellular sulfatase (EC 3.1.6.-)	DKFZp686F13142	Q7Z2W2	0.999958	43.7771	3.37727e-05	126.19	102.97	126.19													0.999958	43.7771	3.37727e-05	126.19																					N	TGYRTVFFGKYLNEYNGSYIPPGWREWLGLI	X;X;X;X;X;X;X;X;X;X;X;X;X;X;X;Deamidation 18O (N);X;X;X;X;X;X;X;X;X;X;X;X;X;X;X
108	A0A024R816	Protein tweety homolog	TTYH3 hCG_18437	A0A024R816	1	80.3031	0.00220775	80.303	66.572	80.303													1	80.3031	0.00220775	80.303																					N	VAGVQDRVWDTAVGLNHTAEPSLQTLERQLA	X;X;X;X;X;X;X;X;X;X;X;X;X;X;X;Deamidation 18O (N);X;X;X;X;X;X;X;X;X;X;X;X;X;X;X
109	Q13219	Pappalysin-1 (EC 3.4.24.79) (Insulin-like growth factor-dependent IGF-binding protein 4 protease) (IGF-dependent IGFBP-4 protease) (IGFBP-4ase) (Pregnancy-associated plasma protein A) (PAPP-A)	PAPPA	Q13219	0.999898	39.9253	1.62165e-05	85.537	83.483	85.537													0.999898	39.9253	1.62165e-05	85.537																					N	RFNFDGGECCDPEITNVTQTCFDPDSPHRAY	X;X;X;X;X;X;X;X;X;X;X;X;X;X;X;Deamidation 18O (N);X;X;X;X;X;X;X;X;X;X;X;X;X;X;X
110	Q13219	Pappalysin-1 (EC 3.4.24.79) (Insulin-like growth factor-dependent IGF-binding protein 4 protease) (IGF-dependent IGFBP-4 protease) (IGFBP-4ase) (Pregnancy-associated plasma protein A) (PAPP-A)	PAPPA	Q13219	0.999509	33.0842	0.0137047	52.483	52.471	52.483													0.999509	33.0842	0.0137047	52.483																					N	CDISKIGDENCDPECNHTLTGHDGGDCRHLR	X;X;X;X;X;X;X;X;X;X;X;X;X;X;X;Deamidation 18O (N);X;X;X;X;X;X;X;X;X;X;X;X;X;X;X
111	Q53FU0	Carbohydrate sulfotransferase (EC 2.8.2.-) (Fragment)		Q53FU0	1	80.9039	0.000169181	118.52	102.58	118.52	0.987539	18.9902	0.0390392	44.968					1	80.9039	0.000169181	118.52																									N	APYRDPLRIPREHVHNASAHLTFNKFWRRYG	X;X;X;X;X;X;X;X;X;X;X;X;X;X;X;Deamidation 18O (N);X;X;X;X;X;X;X;X;X;X;X;X;X;X;X
112	Q53FU0	Carbohydrate sulfotransferase (EC 2.8.2.-) (Fragment)		Q53FU0	1	151.735	2.03573e-23	151.99	135.05	151.74	1	119.867	0.000274564	119.87	1	142.851	5.63463e-09	142.85	1	142.851	5.63463e-09	142.85	1	126.948	7.24077e-05	126.95	1	68.034	0.0153907	68.034	1	98.5924	0.00210259	98.592	1	142.851	5.59078e-16	142.85	1	134.207	8.97222e-07	134.21	1	151.735	2.03573e-23	151.99	N	EFYRKFAVPMLRLYANHTSLPASAREAFRAG	X;X;X;X;X;X;X;X;X;X;X;X;X;X;X;Deamidation 18O (N);X;X;X;X;X;X;X;X;X;X;X;X;X;X;X
113	Q9UKU9	Angiopoietin-related protein 2 (Angiopoietin-like protein 2)	ANGPTL2 ARP2 UNQ170/PRO196	Q9UKU9	1	59.7055	3.3748e-169	300.78	247.03	59.705	1	218.012	1.98454e-65	249.2	1	286.186	2.41707e-128	286.19	1	174.681	5.97637e-110	273.04	1	300.782	3.3748e-169	300.78	1	89.3005	2.49511e-31	219.42	1	243.525	5.30791e-65	243.53	1	289.754	1.37415e-147	289.75	1	290.278	1.29142e-147	290.28	1	59.7055	3.04647e-94	270.02	N	RDNALELSQLENRILNQTADMLQLASKYKDL	X;X;X;X;X;X;X;X;X;X;X;X;X;X;X;Deamidation 18O (N);X;X;X;X;Oxidation (M);X;X;X;X;X;X;X;X;X;X
114	Q9UKU9	Angiopoietin-related protein 2 (Angiopoietin-like protein 2)	ANGPTL2 ARP2 UNQ170/PRO196	Q9UKU9	1	133.759	5.36053e-295	332.63	317.35	133.76	1	46.5581	6.26885e-78	232.87	1	108.405	7.23174e-103	247.34	1	277.068	3.88553e-151	277.07	1	115.837	1.77532e-294	326.87	1	128.124	1.0676e-13	128.12	1	238.631	9.20168e-90	238.63	1	66.8498	5.1993e-215	303.76	1	70.569	5.36053e-295	332.63	1	133.759	5.70094e-103	248.45	N	KDLEHKYQHLATLAHNQSEIIAQLEEHCQRV	X;X;X;X;X;X;X;X;X;X;X;X;X;X;X;Deamidation 18O (N);X;X;X;X;X;X;X;X;X;X;X;X;X;X;X
115	X6RH99	Alpha-N-acetylgalactosaminide alpha-2,6-sialyltransferase 6 (Fragment)	ST6GALNAC6	X6RH99	1	80.1654	0.0233238	89.355	46.108	80.165					1	89.3546	0.0233238	89.355	1	80.1654	0.0315421	80.165																									N	HSSVFRVLRRPQEFVNRTPETVFIFWGPPSK	X;X;X;X;X;X;X;X;X;X;X;X;X;X;X;Deamidation 18O (N);X;X;X;X;X;X;X;X;X;X;X;X;X;X;X
116	Q59EE7	Pro-alpha-1 type V collagen variant (Fragment)		Q59EE7	1	99.8021	0.00278786	141.1	101.03	99.802													1	99.1355	0.00773142	141.1									1	121.048	0.00278786	121.05	1	93.2669	0.019361	93.267	1	99.8021	0.0155903	99.802	N	SDGKWHRIALSVHKKNVTLILDCKKKTTKFL	X;X;X;X;X;X;X;X;X;X;X;X;X;X;X;Deamidation 18O (N);X;X;X;X;X;X;X;X;X;X;X;X;X;X;X
117	Q59EE7	Pro-alpha-1 type V collagen variant (Fragment)		Q59EE7	1	58.0713	3.10251e-25	194.12	163.57	58.071													1	194.124	3.10251e-25	194.12																	1	58.0713	0.0281723	58.071	N	DPNQGCSRDSFKVYCNFTAGGSTCVFPDKKS	X;X;X;X;X;X;X;X;X;X;X;X;X;X;X;Deamidation 18O (N);X;X;X;X;X;X;X;X;X;X;X;X;X;X;X
118	A0A024R8G3	Prostaglandin D2 synthase 21kDa (Brain), isoform CRA_a (Testis tissue sperm-binding protein Li 63n)	PTGDS hCG_1780827	A0A024R8G3	1	228.381	3.15921e-90	247.3	222.61	228.38					1	182.572	1.62283e-30	182.57					1	247.303	3.15921e-90	247.3	1	185.871	6.99994e-31	185.87	1	220.403	1.46743e-54	220.4	1	162.757	6.81194e-39	199.31	1	246.682	3.53089e-90	246.68	1	228.381	7.3864e-65	228.38	N	SMCKSVVAPATDGGLNLTSTFLRKNQCETRT	X;X;X;X;X;X;X;X;X;X;X;X;X;X;X;Deamidation 18O (N);X;X;X;X;X;X;X;X;X;X;X;X;X;X;X
119	A0A024R8G3	Prostaglandin D2 synthase 21kDa (Brain), isoform CRA_a (Testis tissue sperm-binding protein Li 63n)	PTGDS hCG_1780827	A0A024R8G3	1	173.072	3.41519e-23	206.97	179.67	173.07	1	144.698	2.59109e-09	144.7	1	89.2829	0.00376041	89.283					1	206.97	3.41519e-23	206.97					1	79.7406	0.00677707	79.741					1	173.072	3.07903e-09	173.07					N	QDKFLGRWFSAGLASNSSWLREKKAALSMCK	X;X;X;X;X;X;X;X;X;X;X;X;X;X;X;Deamidation 18O (N);X;X;X;X;X;X;X;X;X;X;X;X;X;X;X
120	A0A024R8Q1	Glucosidase, alpha acid (Pompe disease, glycogen storage disease type II), isoform CRA_a	GAA hCG_27920	A0A024R8Q1	1	244.446	1.99689e-71	244.45	216.46	244.45									1	162.925	1.15669e-13	162.93	1	244.446	1.99689e-71	244.45																					N	YRPYDEGLRRGVFITNETGQPLIGKVWPGST	X;X;X;X;X;X;X;X;X;X;X;X;X;X;X;Deamidation 18O (N);X;X;X;X;X;X;X;X;X;X;X;X;X;X;X
121	A0A024R8Q1	Glucosidase, alpha acid (Pompe disease, glycogen storage disease type II), isoform CRA_a	GAA hCG_27920	A0A024R8Q1	1	188.4	6.66584e-127	278.36	232.99	188.4	1	101.203	0.00121041	101.2									1	188.4	8.29675e-25	188.4									1	263.556	4.11597e-109	263.56	1	278.361	6.66584e-127	278.36	1	188.4	8.29675e-25	188.4	N	PWCFFPPSYPSYKLENLSSSEMGYTATLTRT	X;X;X;X;X;X;X;X;X;X;X;X;X;X;X;Deamidation 18O (N);X;X;X;X;X;X;X;X;X;X;X;X;X;X;X
122	A0A024R8Q1	Glucosidase, alpha acid (Pompe disease, glycogen storage disease type II), isoform CRA_a	GAA hCG_27920	A0A024R8Q1	0.5	0	0.0079467	102.07	42.822	102.07													0.5	0	0.00838291	102.07													0.5	0	0.0079467	95.502					N	VLERGAYTQVIFLARNNTIVNELVRVTSEGA	X;X;X;X;X;X;X;X;X;X;X;X;X;X;X;Deamidation 18O (N);X;X;X;X;X;X;X;X;X;X;X;X;X;X;X
123	A0A024R8Q1	Glucosidase, alpha acid (Pompe disease, glycogen storage disease type II), isoform CRA_a	GAA hCG_27920	A0A024R8Q1	0.5	0	0.0079467	102.07	42.822	102.07													0.5	0	0.00838291	102.07													0.5	0	0.0079467	95.502					N	LERGAYTQVIFLARNNTIVNELVRVTSEGAG	X;X;X;X;X;X;X;X;X;X;X;X;X;X;X;X;X;X;X;X;X;X;X;X;X;X;X;X;X;X;X
124	A0A024R8Q1	Glucosidase, alpha acid (Pompe disease, glycogen storage disease type II), isoform CRA_a	GAA hCG_27920	A0A024R8Q1	1	80.9842	8.42674e-10	80.984	75.143	80.984																													1	80.9842	8.42674e-10	80.984					N	VTVLGVATAPQQVLSNGVPVSNFTYSPDTKV	X;X;X;X;X;X;X;X;X;X;X;X;X;X;X;Deamidation 18O (N);X;X;X;X;X;Deamidation 18O (N);X;X;X;X;X;X;X;X;X
125	A0A024R8Q1	Glucosidase, alpha acid (Pompe disease, glycogen storage disease type II), isoform CRA_a	GAA hCG_27920	A0A024R8Q1	1	80.9842	8.42674e-10	80.984	75.143	80.984																													1	80.9842	8.42674e-10	80.984					N	ATAPQQVLSNGVPVSNFTYSPDTKVLDICVS	X;X;X;X;X;X;X;X;X;Deamidation 18O (N);X;X;X;X;X;Deamidation 18O (N);X;X;X;X;X;X;X;X;X;X;X;X;X;X;X
126	F8WFC4	Myelin protein zero-like protein 1	MPZL1	F8WFC4	1	173.371	2.68704e-12	200.6	88.432	173.37					1	134.658	3.35902e-05	134.66					1	193.825	2.36251e-08	193.82	1	190.016	4.78192e-08	190.02	1	172.233	5.31458e-05	172.23	1	186.784	2.2621e-06	186.78	1	200.603	2.68704e-12	200.6	1	173.371	4.65497e-05	173.37	N	VSALEVYTPKEIFVANGTQGKLTCKFKSTST	X;X;X;X;X;X;X;X;X;X;X;X;X;X;X;Deamidation 18O (N);X;X;X;X;X;X;X;X;X;X;X;X;X;X;X
127	B4DTH4	cDNA FLJ51304, highly similar to Angiopoietin-related protein 1		B4DTH4	1	100.756	0.000310143	124.74	64.153	100.76													1	65.3052	0.0450037	65.305									1	102.622	0.00805292	102.62	1	124.743	0.000310143	124.74	1	100.756	0.00628428	100.76	N	RDNSLELSQLENKILNVTTEMLKVATRYREL	X;X;X;X;X;X;X;X;X;X;X;X;X;X;X;Deamidation 18O (N);X;X;X;X;X;X;X;X;X;X;X;X;X;X;X
128	A0A024R930	Proteoglycan 4, isoform CRA_a	PRG4 hCG_41181	A0A024R930	1	138.549	0.00326844	165.52	113.95	138.55	1	151.292	0.00351945	151.29	1	157.579	0.00528762	157.58	1	153.726	0.00414264	153.73	1	165.518	0.005309	165.52	1	145.045	0.00329274	145.04	1	130.638	0.00401629	130.64	1	144.375	0.00326844	144.38	1	125.504	0.00484266	125.5	1	138.549	0.00336532	138.55	N	NICNGKPVDGLTTLRNGTLVAFRGHYFWMLS	X;X;X;X;X;X;X;X;X;X;X;X;X;X;X;Deamidation 18O (N);X;X;X;X;X;X;X;X;X;X;X;X;X;X;X
129	A0A024R931	alpha-1,2-Mannosidase (EC 3.2.1.-)	C1orf22 hCG_2025041	A0A024R931	1	100.554	0.00111618	100.55	85.863	100.55													1	100.554	0.00111618	100.55																					N	LQMAKQLGYKLLPAFNTTSGLPYPRINLKFG	X;X;X;X;X;X;X;X;X;X;X;X;X;X;X;Deamidation 18O (N);X;X;X;X;X;X;X;X;X;X;X;X;X;X;X
130	A0A0K0Q2Z1	Serpin peptidase inhibitor clade C member 1	SERPINC1	A0A0K0Q2Z1	1	219.892	0	426.89	363.46	219.89	1	171.734	3.33541e-14	171.73	1	426.886	0	426.89	1	345.146	0	345.15	1	153.809	0	423.63	1	346.18	0	346.18	1	352.495	0	352.49	1	426.886	0	426.89	1	202.605	0	408.64	1	219.892	0	415.9	N	LSISTAFAMTKLGACNDTLQQLMEVFKFDTI	X;X;X;X;X;X;X;X;X;X;X;X;X;X;X;Deamidation 18O (N);X;X;X;X;X;X;Oxidation (M);X;X;X;X;X;X;X;X
131	A0A0K0Q2Z1	Serpin peptidase inhibitor clade C member 1	SERPINC1	A0A0K0Q2Z1	1	195.773	0	358.91	321.77	195.77	1	292.218	1.24131e-177	292.22	1	308.579	6.11724e-225	308.58					1	358.914	0	358.91									1	332.061	8.33885e-280	332.06	1	176.915	4.18809e-252	324.81	1	195.773	4.18809e-252	324.81	N	LVSANRLFGDKSLTFNETYQDISELVYGAKL	X;X;X;X;X;X;X;X;X;X;X;X;X;X;X;Deamidation 18O (N);X;X;X;X;X;X;X;X;X;X;X;X;X;X;X
132	A0A024R957	Torsin A interacting protein 2, isoform CRA_b	TOR1AIP2 hCG_2039855	A0A024R957	0.998944	29.7571	1.07585e-07	102.89	92.079	102.89													0.94141	12.0595	0.00740744	64.249																	0.998944	29.7571	1.07585e-07	102.89	N	SFLWQRGRKFLQKHLNASNPTEPATIIFTAA	X;X;X;X;X;X;X;X;X;X;X;X;X;X;X;Deamidation 18O (N);X;X;X;X;X;X;X;X;X;X;X;X;X;X;X
133	A0A024R962	HCG40889, isoform CRA_b	hCG_40889	A0A024R962	1	114.4	1.4275e-22	182.31	161.58	114.4					1	111.77	2.39216e-05	111.77	1	126.097	1.40627e-12	126.1	1	133.781	1.67764e-10	133.78	1	176.113	1.8177e-21	176.11	1	129.418	2.29629e-08	129.42	1	101.532	5.99646e-07	118.72	1	182.313	1.4275e-22	182.31	1	114.4	2.30152e-07	114.4	N	KIPCSQPPQIEHGTINSSRSSQESYAHGTKL	X;X;X;X;X;X;X;X;X;X;X;X;X;X;X;Deamidation 18O (N);X;X;X;X;X;X;X;X;X;X;X;X;X;X;X
134	A0A024R962	HCG40889, isoform CRA_b	hCG_40889	A0A024R962	1	173.236	1.62048e-23	215.06	208.53	173.24					1	116.233	0.0010846	116.23	1	125.74	0.000222237	125.74	1	175.905	1.47705e-22	208.33									1	192.548	1.13643e-22	210.08	1	175.905	1.62048e-23	215.06	1	173.236	1.62048e-23	215.06	N	KLSYTCEGGFRISEENETTCYMGKWSSPPQC	X;X;X;X;X;X;X;X;X;X;X;X;X;X;X;Deamidation 18O (N);X;X;X;X;X;Oxidation (M);X;X;X;X;X;X;X;X;X
135	A0A024R962	HCG40889, isoform CRA_b	hCG_40889	A0A024R962	1	145.985	1.62162e-109	275.84	223.58	275.84													1	124.226	2.91413e-52	241.92					0.999996	53.863	9.87759e-05	130.01	1	132.949	1.79646e-109	275.38	1	132.911	1.38657e-64	247.31	1	145.985	1.62162e-109	275.84	N	VTYTCATYYKMDGASNVTCINSRWTGRPTCR	X;X;X;X;X;X;X;X;X;X;Oxidation (M);X;X;X;X;Deamidation 18O (N);X;X;X;X;X;X;X;X;X;X;X;X;X;X;X
136	A0A024R962	HCG40889, isoform CRA_b	hCG_40889	A0A024R962	1	115.412	0.000481485	115.41	81.159	115.41													1	115.412	0.000481485	115.41																					N	KPKCVEISCKSPDVINGSPISQKIIYKENER	X;X;X;X;X;X;X;X;X;X;X;X;X;X;X;Deamidation 18O (N);X;X;X;X;X;X;X;X;X;X;X;X;X;X;X
137	A0A024R962	HCG40889, isoform CRA_b	hCG_40889	A0A024R962;Q03591	1	167.374	3.33647e-65	167.37	161.11	167.37													1	167.374	3.33647e-65	167.37																					N	RSPYEMFGDEEVMCLNGNWTEPPQCKDSTGK	X;X;X;X;X;X;X;X;X;X;X;X;X;X;X;Deamidation 18O (N);X;Deamidation 18O (N);X;X;X;X;X;X;X;X;X;X;X;X;X
138	A0A024R962	HCG40889, isoform CRA_b	hCG_40889	A0A024R962;Q03591	1	167.374	3.33647e-65	167.37	161.11	167.37													1	167.374	3.33647e-65	167.37																					N	PYEMFGDEEVMCLNGNWTEPPQCKDSTGKCG	X;X;X;X;X;X;X;X;X;X;X;X;X;Deamidation 18O (N);X;Deamidation 18O (N);X;X;X;X;X;X;X;X;X;X;X;X;X;X;X
139	A0A024R962	HCG40889, isoform CRA_b	hCG_40889	A0A024R962	1	89.8692	1.73075e-14	109.09	103.22	109.09					0.999999	61.1819	1.33864e-09	70.268					1	89.8692	1.73075e-14	109.09									0.999831	38.4233	0.000130904	45.361									N	WIHTVCINGRWDPEVNCSMAQIQLCPPPPQI	X;X;X;X;X;X;X;X;X;X;X;X;X;X;X;Deamidation 18O (N);X;X;X;X;X;X;X;X;X;X;X;X;X;X;X
140	A0A024R962	HCG40889, isoform CRA_b	hCG_40889	A0A024R962	0.534947	0.786275	1.33864e-09	70.268	65.824	70.268					0.534947	0.786275	1.33864e-09	70.268																													N	SMAQIQLCPPPPQIPNSHNMTTTLNYRDGEK	X;X;X;X;X;X;X;X;X;X;X;X;X;X;X;Deamidation 18O (N);X;X;X;X;X;X;X;X;X;X;X;X;X;X;X
141	A0A024R962	HCG40889, isoform CRA_b	hCG_40889	A0A024R962	0.765034	6.27799	1.73075e-14	109.09	103.22	45.361													0.754678	5.59473	1.73075e-14	109.09									0.765034	6.27799	0.000130904	45.361									N	QIQLCPPPPQIPNSHNMTTTLNYRDGEKVSV	X;X;X;X;X;X;X;X;X;X;X;X;X;X;X;Deamidation 18O (N);X;X;X;X;X;X;X;X;X;X;X;X;X;X;X
142	A0A3B3IRN5	Fibromodulin	FMOD	A0A3B3IRN5	1	119.266	5.74844e-16	128.06	102.74	128.06					1	119.266	5.74844e-16	128.06																													N	NEFSISSFCTVVDVVNFSKLQVLRLDGNEIK	X;X;X;X;X;X;X;X;X;X;X;X;X;X;X;Deamidation 18O (N);X;X;X;X;X;X;X;X;X;X;X;X;X;X;X
143	A0A3B3IRN5	Fibromodulin	FMOD	A0A3B3IRN5	0.505467	1.85591	1.16599e-06	67.14	57.596	67.14																					0.505467	1.85591	1.16599e-06	67.14													N	YFRGAPKLLYVRLSHNSLTNNGLASNTFNSS	X;X;X;X;X;X;X;X;X;X;X;X;X;X;X;Deamidation 18O (N);X;X;X;Deamidation 18O (N);X;X;X;X;X;X;X;X;X;X;X
144	A0A3B3IRN5	Fibromodulin	FMOD	A0A3B3IRN5	0.974759	18.5423	3.85936e-40	148.22	137.94	43.903	0.974759	18.5423	1.0003e-11	93.295									0.545475	0.949481	3.85936e-40	148.22	0.566551	1.19018	8.59572e-09	71.299	0.439037	0	3.04009e-33	109.77					0.536897	1.10377	1.68072e-10	85.745	0.729972	5.87571	2.24845e-09	70.151	N	APKLLYVRLSHNSLTNNGLASNTFNSSSLLE	X;X;X;X;X;X;X;X;X;X;X;Deamidation 18O (N);X;X;X;Deamidation 18O (N);Deamidation 18O (N);X;X;X;X;Deamidation 18O (N);X;X;Deamidation 18O (N);X;X;X;X;X;X
145	A0A3B3IRN5	Fibromodulin	FMOD	A0A3B3IRN5	0.974759	18.5423	8.2783e-57	148.22	137.94	43.903	0.974759	18.5423	8.2783e-57	137.44	0.686071	6.22308	2.43901e-54	135.7	0.59209	0	1.95226e-25	110.25	0.581151	3.30082	1.61456e-45	148.22	0.762052	5.36076	6.80478e-55	140.45	0.658724	3.30376	3.38998e-54	133.13	0.766528	6.22464	1.80546e-41	127.92	0.609955	0	2.32624e-54	136	0.958186	13.0771	5.01382e-47	129.03	N	PKLLYVRLSHNSLTNNGLASNTFNSSSLLEL	X;X;X;X;X;X;X;X;X;X;X;X;X;X;Deamidation 18O (N);Deamidation 18O (N);X;X;X;X;Deamidation 18O (N);X;X;Deamidation 18O (N);X;X;X;X;X;X;X
146	A0A3B3IRN5	Fibromodulin	FMOD	A0A3B3IRN5	0.997287	27.4817	4.08904e-64	150.4	140.43	126.8	0.98822	20.4252	8.2783e-57	137.44					0.59209	0	9.21879e-36	119.64	0.771716	6.06025	1.61456e-45	148.22	0.651743	0	6.80478e-55	140.45	0.623073	8.16037	9.56614e-36	119.42	0.761042	5.82008	1.80546e-41	121.23	0.997287	27.4817	2.32624e-54	136	0.944974	11.883	4.08904e-64	150.4	N	VRLSHNSLTNNGLASNTFNSSSLLELDLSYN	X;X;X;X;X;X;X;X;X;Deamidation 18O (N);Deamidation 18O (N);X;X;X;X;Deamidation 18O (N);X;X;Deamidation 18O (N);X;X;X;X;X;X;X;X;X;X;X;X
147	A0A3B3IRN5	Fibromodulin	FMOD	A0A3B3IRN5	1	64.0355	0	346.64	336.25	247.52	0.997337	27.6915	4.87306e-74	153.41	0.999999	61.4437	0	346.64	0.999838	37.8918	8.63148e-101	212.78	0.918665	10.0618	4.32632e-55	148.22	0.999997	55.7138	5.63071e-148	246.9	0.999999	58.9003	3.47428e-163	257.94	1	64.0355	2.70788e-258	247.52	0.999998	57.3898	1.37839e-179	264.33	0.999226	31.1111	2.18658e-148	250.38	N	SHNSLTNNGLASNTFNSSSLLELDLSYNQLQ	X;X;X;X;X;X;Deamidation 18O (N);Deamidation 18O (N);X;X;X;X;Deamidation 18O (N);X;X;Deamidation 18O (N);X;X;X;X;X;X;X;X;X;X;X;Deamidation 18O (N);X;X;X
148	A0A3B3IRN5	Fibromodulin	FMOD	A0A3B3IRN5	0.976467	16.0759	1.4352e-13	79.782	68.655	79.782	0.976467	16.0759	1.4352e-13	79.782																													0.892007	9.60344	1.50685e-08	68.269	N	NTFNSSSLLELDLSYNQLQKIPPVNTNLENL	X;X;X;Deamidation 18O (N);X;X;X;X;X;X;X;X;X;X;X;Deamidation 18O (N);X;X;X;X;X;X;X;X;X;X;X;X;X;X;X
149	A0A3B3IRN5	Fibromodulin	FMOD	A0A3B3IRN5	1	50.0335	0.00357195	110.76	80.947	50.034	0.5	0	0.00357195	110.76					0.5	0	0.0325389	51.445	0.5	0	0.035579	75.378	1	94.2966	0.010575	94.297	1	50.0335	0.0235288	60.434					0.657984	2.84169	0.0228226	76.827	0.546169	0.804333	0.0399812	40.589	N	VFSKLRHLERLYLDHNNLTRMPGPLPRSLRE	X;X;X;X;X;X;X;X;X;X;X;X;X;X;X;Deamidation 18O (N);Deamidation 18O (N);X;X;X;X;X;X;X;X;X;X;X;X;X;X
150	A0A3B3IRN5	Fibromodulin	FMOD	A0A3B3IRN5	1	50.0335	7.72146e-185	285.74	224.98	50.034	0.999961	44.0947	2.71889e-79	228.05	0.999926	41.3252	1.11934e-101	244.61	0.999804	37.0799	3.04464e-17	204.07	0.997898	26.7653	1.08667e-22	223.32	1	94.2966	2.53625e-22	222	1	50.0335	7.72146e-185	285.74	0.999623	34.2354	1.26339e-29	220.39	0.999755	36.1026	1.31724e-29	210.6	0.998428	28.0288	6.25209e-30	196.79	N	FSKLRHLERLYLDHNNLTRMPGPLPRSLREL	X;X;X;X;X;X;X;X;X;X;X;X;X;X;Deamidation 18O (N);Deamidation 18O (N);X;X;X;X;X;X;X;X;X;X;X;X;X;X;X
151	A0A3B3IRN5	Fibromodulin	FMOD	A0A3B3IRN5	0.933278	10.0504	2.14369e-65	176.97	164.76	41.83	0.933278	10.0504	3.09834e-31	116.35	0.891793	9.16	8.2464e-37	129.73					0.862154	7.9662	2.36121e-10	85.489													0.769449	5.23382	2.14369e-65	176.97					N	LRELHLDHNQISRVPNNALEGLENLTALYLQ	X;X;X;X;X;X;X;X;X;X;X;X;X;X;X;Deamidation 18O (N);Deamidation 18O (N);X;X;X;X;X;X;Deamidation 18O (N);X;X;X;X;X;X;X
152	A0A3B3IRN5	Fibromodulin	FMOD	A0A3B3IRN5	0.880555	8.67588	1.69464e-49	143.35	123.09	143.35	0.79295	5.13237	3.09834e-31	116.35																					0.880555	8.67588	1.69464e-49	143.35					0.834169	7.01614	1.07453e-36	128.71	N	RELHLDHNQISRVPNNALEGLENLTALYLQH	X;X;X;X;X;X;X;X;X;X;X;X;X;X;Deamidation 18O (N);Deamidation 18O (N);X;X;X;X;X;X;Deamidation 18O (N);X;X;X;X;X;X;X;X
153	A0A3B3IRN5	Fibromodulin	FMOD	A0A3B3IRN5	1	165.133	0	392.37	372.49	369.38	1	169.539	0	386.25	1	156.361	0	381.53	1	154.19	0	392.37	1	165.133	0	369.38	1	75.5969	2.48889e-65	176.28					1	135.596	5.97141e-299	324.4	1	100.63	2.43435e-180	271.13	1	141.047	2.84277e-222	295.01	N	NQISRVPNNALEGLENLTALYLQHNEIQEVG	X;X;X;X;X;X;X;Deamidation 18O (N);Deamidation 18O (N);X;X;X;X;X;X;Deamidation 18O (N);X;X;X;X;X;X;X;X;X;X;X;X;X;X;X
154	A0A3B3IRN5	Fibromodulin	FMOD	A0A3B3IRN5	0.948782	11.1989	0.0101502	41.83	25.942	41.83	0.948782	11.1989	0.0101502	41.83																																	N	ALEGLENLTALYLQHNEIQEVGSSMRGLRSL	X;X;X;X;X;X;X;X;X;X;X;X;X;X;X;Deamidation 18O (N);X;X;X;X;X;X;X;X;Oxidation (M);X;X;X;X;X;X
155	A0A3B3IRN5	Fibromodulin	FMOD	A0A3B3IRN5	0.892681	9.20022	6.31938e-128	186.23	174.59	186.23																													0.892681	9.20022	6.31938e-128	186.23	0.831474	6.91762	7.42559e-13	69.523	N	YLPFVPSRMKYVYFQNNQITSIQEGVFDNAT	X;X;X;X;X;X;X;X;X;X;X;X;X;X;X;Deamidation 18O (N);X;X;X;X;X;X;X;X;X;X;X;X;Deamidation 18O (N);X;X
156	A0A3B3IRN5	Fibromodulin	FMOD	A0A3B3IRN5	0.506495	0	4.6693e-18	78.228	69.315	62.105																													0.506495	0	4.6693e-18	78.228	0.500282	0	1.74075e-06	58.672	N	LPFVPSRMKYVYFQNNQITSIQEGVFDNATG	X;X;X;X;X;X;X;X;X;X;X;X;X;X;X;X;X;X;X;X;X;X;X;X;X;X;X;X;X;X;X
157	A0A3B3IRN5	Fibromodulin	FMOD	A0A3B3IRN5	1	97.7209	3.30088e-243	297.87	290.08	297.87	1	97.7209	3.30088e-243	297.87	1	94.09	2.80142e-136	236.73	1	95.3856	4.57837e-95	205.09													0.999861	38.7223	1.33922e-12	86.507	1	81.2545	6.31938e-128	186.23	0.998008	28.4604	7.42559e-13	69.523	N	FQNNQITSIQEGVFDNATGLLWIALHGNQIT	X;X;Deamidation 18O (N);X;X;X;X;X;X;X;X;X;X;X;X;Deamidation 18O (N);X;X;X;X;X;X;X;X;X;X;X;Deamidation 18O (N);X;X;X
158	A0A3B3IRN5	Fibromodulin	FMOD	A0A3B3IRN5	0.968081	16.9386	7.30952e-05	45.47	38.55	45.47									0.968081	16.9386	7.30952e-05	45.47																									N	VFDNATGLLWIALHGNQITSDKVGRKVFSKL	X;X;X;Deamidation 18O (N);X;X;X;X;X;X;X;X;X;X;X;Deamidation 18O (N);X;X;X;X;X;X;X;X;X;X;X;X;X;X;X
159	A0A024R972	Laminin, gamma 1 (Formerly LAMB2), isoform CRA_a	LAMC1 hCG_40729	A0A024R972	1	101.452	2.4272e-138	296.78	278.04	280.55													1	74.7158	1.77699e-86	267.63									1	77.0819	2.4272e-138	296.78	1	101.452	2.30517e-119	280.55	0.998705	28.872	1.64838e-66	188.28	N	FVGNRCDQCEENYFYNRSWPGCQECPACYRL	X;X;X;X;X;X;X;X;X;X;X;X;X;X;X;Deamidation 18O (N);X;X;X;X;X;X;X;X;X;X;X;X;X;X;X
160	A0A024R972	Laminin, gamma 1 (Formerly LAMB2), isoform CRA_a	LAMC1 hCG_40729	A0A024R972	1	135.415	1.12718e-44	234.24	183.17	233.46													1	87.7285	1.53798e-09	176.78	0.999999	58.6261	0.00349863	99.215	1	76.8306	0.000511599	93.716	1	135.415	7.72782e-42	233.46	1	134.219	1.12718e-44	234.24	1	130.969	1.88954e-23	210.95	N	NKTAAEEALRKIPAINQTITEANEKTREAQQ	X;X;X;X;X;X;X;X;X;X;X;X;X;X;X;Deamidation 18O (N);X;X;X;X;X;X;X;X;X;X;X;X;X;X;X
161	A0A024R972	Laminin, gamma 1 (Formerly LAMB2), isoform CRA_a	LAMC1 hCG_40729	A0A024R972	0.998988	29.942	0.00191118	150.4	63.533	150.4													0.984867	18.1345	0.00242985	145.16	0.816922	6.49543	0.0214642	88.948					0.970079	15.1083	0.00191118	128.61	0.998988	29.942	0.00222714	150.4	0.998861	29.4286	0.00194134	126.52	N	WRPALTPFEFQKLLNNLTSIKIRGTYSERSA	X;X;X;X;X;X;X;X;X;X;X;X;X;X;X;Deamidation 18O (N);X;X;X;X;X;X;X;X;X;X;X;X;X;X;X
162	A0A024R972	Laminin, gamma 1 (Formerly LAMB2), isoform CRA_a	LAMC1 hCG_40729	A0A024R972	1	144.103	2.68513e-09	144.1	102.1	144.1													1	144.103	2.68513e-09	144.1																					N	APAKFLGKQVLSYGQNLSFSFRVDRRDTRLS	X;X;X;X;X;X;X;X;X;X;X;X;X;X;X;Deamidation 18O (N);X;X;X;X;X;X;X;X;X;X;X;X;X;X;X
163	A0A024R972	Laminin, gamma 1 (Formerly LAMB2), isoform CRA_a	LAMC1 hCG_40729	A0A024R972	1	202.133	2.58056e-179	306.55	275.66	249.69													1	249.203	2.58056e-179	306.55	1	102.474	3.32901e-09	126.76	1	146.031	3.5522e-19	197.3	1	173.328	5.41149e-38	224.42	1	243.809	1.55479e-178	301.16	1	202.133	7.09608e-72	249.69	N	HKQEADDIVRVAKTANDTSTEAYNLLLRTLA	X;X;X;X;X;X;X;X;X;X;X;X;X;X;X;Deamidation 18O (N);X;X;X;X;X;X;X;X;X;X;X;X;X;X;X
164	A0A024R972	Laminin, gamma 1 (Formerly LAMB2), isoform CRA_a	LAMC1 hCG_40729	A0A024R972	1	251.298	0	390.16	343.21	366.19	0.999961	44.0883	0.0460799	53.6	1	83.0199	2.12522e-07	126.56	1	128.964	5.59592e-30	202.4	1	255.608	0	360.04									1	272.643	0	390.16	1	154.248	1.17859e-20	169.64	1	251.298	0	366.19	N	STEAYNLLLRTLAGENQTAFEIEELNRKYEQ	X;X;X;X;X;X;X;X;X;X;X;X;X;X;X;Deamidation 18O (N);X;X;X;X;X;X;X;X;X;X;X;X;X;X;X
165	A0A024R972	Laminin, gamma 1 (Formerly LAMB2), isoform CRA_a	LAMC1 hCG_40729	A0A024R972	0.999999	62.6665	1.10221e-25	218.47	189.32	205.09													0.999999	60.8029	1.10221e-25	218.47	0.99996	43.9579	4.35105e-05	163.64	0.999995	52.7334	3.89666e-06	185.61	0.999999	62.6665	7.13348e-13	205.09	0.999999	60.3337	1.90701e-18	213.31	0.999995	52.7908	4.93901e-05	172.88	N	VKDVDQNLMDRLQRVNNTLSSQISRLQNIRN	X;X;X;X;X;X;X;X;X;X;X;X;X;X;X;Deamidation 18O (N);X;X;X;X;X;X;X;X;X;X;X;X;X;X;X
166	E5RJA8	Carboxypeptidase Q (Fragment)	CPQ	E5RJA8	1	103.497	1.22876e-16	201.75	146.18	201.75	1	103.497	1.22876e-16	201.75	1	82.7304	1.20025e-08	161.67	1	64.6653	2.27105e-16	150.04													0.999989	49.4657	2.05221e-10	138.71									N	SEARGKIVVYNQPYINYSRTVQY________	X;X;X;X;X;X;X;X;X;X;X;X;X;X;X;Deamidation 18O (N);X;X;X;X;X;X;X;X;X;X;X;X;X;X;X
167	B4DFW1	cDNA FLJ52457, highly similar to Protein NOV homolog		B4DFW1	1	66.2625	0.0215835	66.262	57.068	66.262																					1	66.2625	0.0215835	66.262													N	LRTKKSLKAIHLQFKNCTSLHTYKPRFCGVC	X;X;X;X;X;X;X;X;X;X;X;X;X;X;X;Deamidation 18O (N);X;X;X;X;X;X;X;X;X;X;X;X;X;X;X
173	H7C0X5	Probable serine carboxypeptidase CPVL (Fragment)	CPVL	H7C0X5	1	84.7216	1.55795e-07	123.14	106.61	123.14													1	84.7216	1.55795e-07	123.14																					N	KFLSLPEVRQAIHVGNQTFNDGTIVEKYLRE	X;X;X;X;X;X;X;X;X;X;X;X;X;X;X;Deamidation 18O (N);X;X;X;X;X;X;X;X;X;X;X;X;X;X;X
174	B4DLL8	cDNA FLJ59335, highly similar to Transmembrane glycoprotein NMB		B4DLL8	0.998825	29.2953	8.5045e-09	138.89	97.19	138.89																													0.998825	29.2953	8.5045e-09	138.89	0.998359	27.8425	0.000462269	123.2	N	DQIPVFVTMFQKNDRNSSDETFLKDLPIMFD	X;X;X;X;X;X;X;X;X;X;X;X;X;X;X;Deamidation 18O (N);X;X;X;X;X;X;X;X;X;X;X;X;X;X;X
175	B4DLL8	cDNA FLJ59335, highly similar to Transmembrane glycoprotein NMB		B4DLL8	1	63.3036	4.9574e-78	240.2	219.77	240.2													1	63.3036	4.9574e-78	240.2																					N	QKLGRCSVRVSVNTANVTLGPQLMEVTVYRR	X;X;X;X;X;X;X;X;X;X;X;X;X;X;X;Deamidation 18O (N);X;X;X;X;X;X;X;X;X;X;X;X;X;X;X
176	B4DRK1	cDNA FLJ50841, highly similar to Zinc finger protein GLI3		B4DRK1	1	44.807	0.0167156	68.536	14.969	44.807																									1	43.791	0.037366	43.791	1	44.807	0.0167156	68.536	1	44.807	0.0357804	44.807	N	LPGRSDLSGVDVTMLNMLNRRDSSASTISSA	X;X;X;X;X;X;X;X;X;X;X;X;X;X;X;Deamidation 18O (N);X;X;Deamidation 18O (N);X;X;X;X;X;X;X;X;X;X;X;X
177	B4DRK1	cDNA FLJ50841, highly similar to Zinc finger protein GLI3		B4DRK1	1	44.807	0.0167156	68.536	14.969	44.807																									1	43.791	0.037366	43.791	1	44.807	0.0167156	68.536	1	44.807	0.0357804	44.807	N	RSDLSGVDVTMLNMLNRRDSSASTISSAYLS	X;X;X;X;X;X;X;X;X;X;X;X;Deamidation 18O (N);X;X;Deamidation 18O (N);X;X;X;X;X;X;X;X;X;X;X;X;X;X;X
178	A0A024RAB6	Heparan sulfate proteoglycan 2 (Perlecan), isoform CRA_b	HSPG2 hCG_1981506	A0A024RAB6	1	68.6393	7.63429e-106	260.53	257.12	68.639	1	247.289	6.10041e-91	247.29	1	254.841	9.79242e-105	254.84	1	247.31	2.67162e-91	247.31	1	114.691	7.63429e-106	260.53					1	155.281	7.31949e-26	155.28	1	208.856	7.79047e-47	208.86	1	68.6393	4.96799e-09	123.19					N	FPRACTEAEFACHSYNECVALEYRCDRRPDC	X;X;X;X;X;X;X;X;X;X;X;X;X;X;X;Deamidation 18O (N);X;X;X;X;X;X;X;X;X;X;X;X;X;X;X
179	A0A024RAB6	Heparan sulfate proteoglycan 2 (Perlecan), isoform CRA_b	HSPG2 hCG_1981506	A0A024RAB6	1	98.4179	0.00961312	139.92	65.501	98.418	1	76.0346	0.0365856	138.48	1	79.1455	0.0233355	79.146					1	131.037	0.0109057	131.04	1	138.074	0.0464681	138.07	1	139.917	0.00961312	139.92					1	98.4179	0.0190814	98.418					N	LGSGDFQMVYFRALVNFTRSIEYSPQLEDAG	X;X;X;X;X;X;X;X;X;X;X;X;X;X;X;Deamidation 18O (N);X;X;X;X;X;X;X;X;X;X;X;X;X;X;X
180	A0A024RAB6	Heparan sulfate proteoglycan 2 (Perlecan), isoform CRA_b	HSPG2 hCG_1981506	A0A024RAB6	1	157.119	1.29391e-148	247.36	227.85	157.12	1	119.113	1.29391e-148	247.36	1	109.271	1.29801e-77	175.48	1	212.217	2.52904e-101	212.22	1	191.99	2.46904e-87	191.99	1	132.9	1.73711e-25	132.9	1	192.243	2.35641e-87	192.24	1	207.775	9.33928e-101	207.78	1	138.592	3.77117e-77	172.74	1	157.119	5.75229e-64	163.55	N	QIRLRFDQPDDFKGVNVTMPAQPGTPPLSST	X;X;X;X;X;X;X;X;X;X;X;X;X;X;X;Deamidation 18O (N);X;X;Oxidation (M);X;X;X;X;X;X;X;X;X;X;X;X
181	A0A024RAB6	Heparan sulfate proteoglycan 2 (Perlecan), isoform CRA_b	HSPG2 hCG_1981506	A0A024RAB6	1	178.53	7.94747e-103	240.75	208.05	178.53	1	136.436	1.10259e-21	136.44	1	146.501	2.58054e-30	146.5	1	189.09	7.76671e-57	189.09	1	227.512	7.59998e-90	227.51					1	94.5417	0.00011898	94.542	1	110.94	6.33304e-90	228.63	1	159.162	7.94747e-103	240.75	1	178.53	5.99169e-52	178.53	N	RELRIQGEEIVFHDLNLTAHGISHCPTCRDR	X;X;X;X;X;X;X;X;X;X;X;X;X;X;X;Deamidation 18O (N);X;X;X;X;X;X;X;X;X;X;X;X;X;X;X
182	A0A024RAB6	Heparan sulfate proteoglycan 2 (Perlecan), isoform CRA_b	HSPG2 hCG_1981506	A0A024RAB6	1	147.096	5.37264e-12	147.1	142.63	147.1																					1	112.5	0.000295378	112.5	1	147.096	5.37264e-12	147.1									N	GEACRCKNNVVGRLCNECADGSFHLSTRNPD	X;X;X;X;X;X;X;X;X;X;X;X;X;X;X;Deamidation 18O (N);X;X;X;X;X;X;X;X;X;X;X;X;X;X;X
183	A0A024RAB6	Heparan sulfate proteoglycan 2 (Perlecan), isoform CRA_b	HSPG2 hCG_1981506	A0A024RAB6	1	96.5565	0.000841913	128.36	112.73	123.86					1	66.8581	0.00785695	96.331	1	84.4521	0.0130712	103.55	1	79.2867	0.00308405	111.61	1	96.5565	0.0120083	123.86	1	83.49	0.00785695	96.331	1	96.041	0.000841913	128.36	1	73.9491	0.0172983	101.25					N	DAGVYICTCRNLHQSNTSRAELLVTEAPSKP	X;X;X;X;X;X;X;X;X;X;X;X;X;X;X;Deamidation 18O (N);X;X;X;X;X;X;X;X;X;X;X;X;X;X;X
184	A0A024RAB6	Heparan sulfate proteoglycan 2 (Perlecan), isoform CRA_b	HSPG2 hCG_1981506	A0A024RAB6	1	140.123	0	416.3	345.74	140.12	1	300.332	9.59764e-214	300.33	1	263.588	4.52792e-132	263.59	1	311.807	1.03704e-238	311.81	1	343.239	0	343.24	1	45.511	1.06705e-169	286.34	1	318.318	3.0418e-265	318.32	1	416.305	0	416.3	1	158.907	0	343.3	1	140.123	0	353.14	N	SLTQGSLIVGDLAPVNGTSQGKFQGLDLNEE	X;X;X;X;X;X;X;X;X;X;X;X;X;X;X;Deamidation 18O (N);X;X;X;X;X;X;X;X;X;X;X;X;X;X;X
185	B7Z1D1	Alkaline phosphatase (EC 3.1.3.1)		B7Z1D1	1	222.39	3.51737e-269	340.93	320.79	293.94													1	216.397	1.30715e-147	290.18	1	177.695	7.03844e-41	227.2	1	254.237	3.24723e-216	322.77	1	258.755	3.51737e-269	340.93	1	234.222	3.3748e-169	300.78	1	222.39	7.11944e-148	293.94	N	EGTVGVSAATERSRCNTTQGNEVTSILRWAK	X;X;X;X;X;X;X;X;X;X;X;X;X;X;X;Deamidation 18O (N);X;X;X;X;X;X;X;X;X;X;X;X;X;X;X
186	B7Z1D1	Alkaline phosphatase (EC 3.1.3.1)		B7Z1D1	1	189.758	3.0917e-242	275.5	252.05	275.5													1	164.563	2.73638e-66	221.25	1	112.544	1.73316e-31	155.16	1	187.719	2.12667e-117	261.17	1	177.851	3.0917e-242	258.87	1	189.758	2.53579e-150	275.5					N	YGNGPGYKVVGGERENVSMVDYAHNNYQAQS	X;X;X;X;X;X;X;X;X;X;X;X;X;X;X;Deamidation 18O (N);X;X;Oxidation (M);X;X;X;X;X;Deamidation 18O (N);X;X;X;X;X;X
187	B7Z1D1	Alkaline phosphatase (EC 3.1.3.1)		B7Z1D1	0.869126	8.22217	2.31805e-10	93.572	76.424	93.572																													0.869126	8.22217	2.31805e-10	93.572					N	VGGERENVSMVDYAHNNYQAQSAVPLRHETH	X;X;X;X;X;X;Deamidation 18O (N);X;X;X;X;X;X;X;X;Deamidation 18O (N);X;X;X;X;X;X;X;X;X;X;X;X;X;X;X
188	B7Z1D1	Alkaline phosphatase (EC 3.1.3.1)		B7Z1D1	1	101.719	1.38244e-202	319.46	266.13	101.72													1	116.546	0.00530243	116.55									1	242.97	8.65265e-47	242.97	1	96.2296	1.38244e-202	319.46	1	101.719	3.41607e-08	193.94	N	IDVIMGGGRKYMYPKNKTDVEYESDEKARGT	X;X;X;X;X;X;X;X;X;X;X;X;X;X;X;Deamidation 18O (N);X;X;X;X;X;X;X;X;X;X;X;X;X;X;X
189	X6RLJ0	Complement C1q subcomponent subunit A (Fragment)	C1QA	X6RLJ0	0.961001	15.4241	8.49277e-19	98.627	87.21	98.627																													0.961001	15.4241	8.49277e-19	98.627					N	RPAFSAIRRNPPMGGNVVIFDTVITNQEEPY	X;X;X;X;X;X;X;X;X;X;X;X;X;X;X;Deamidation 18O (N);X;X;X;X;X;X;X;X;X;X;X;X;X;X;X
190	X6RLJ0	Complement C1q subcomponent subunit A (Fragment)	C1QA	X6RLJ0	1	98.0937	0	390.81	359.49	223.09	1	78.4547	2.27228e-63	199.3	1	69.1326	2.66301e-91	230.77	0.999998	56.6602	5.40948e-91	227.19	1	72.7893	1.03972e-206	295.19	0.999999	60.8465	4.64645e-52	170.82	1	72.1666	1.05554e-45	159.66	1	98.0937	6.3847e-119	242.94	1	69.6697	3.07228e-131	255.68	1	93.3583	0	390.81	N	VIFDTVITNQEEPYQNHSGRFVCTVPGYYYF	X;X;X;X;X;X;X;X;X;X;X;X;X;X;X;Deamidation 18O (N);X;X;X;X;X;X;X;X;X;X;X;X;X;X;X
191	A0A024RAK9	Hyaluronan and proteoglycan link protein 1, isoform CRA_a	HAPLN1 hCG_39210	A0A024RAK9	1	58.29	3.07724e-07	92.939	78.378	58.29									1	56.9005	3.07724e-07	92.939									1	77.8708	4.6852e-05	77.871	1	55.3828	0.0307653	55.383					1	58.29	0.00919639	58.29	N	NYTLDHDRAIHIQAENGPHLLVEAEQAKVFS	X;X;X;X;X;X;X;X;X;X;X;X;X;X;X;Deamidation 18O (N);X;X;X;X;X;X;X;X;X;X;X;X;X;X;X
192	A0A024RAK9	Hyaluronan and proteoglycan link protein 1, isoform CRA_a	HAPLN1 hCG_39210	A0A024RAK9	1	108.667	0.00126874	163.32	124.51	108.67	1	123.883	0.00126874	138.54	1	63.7269	0.00184428	133.23	1	108.667	0.00223488	138.54	1	163.319	0.00387927	163.32	1	128.686	0.00191004	128.69	1	80.2187	0.00196358	124.98	1	90.7088	0.00391778	116.73	1	138.545	0.0023659	146.81	1	131.504	0.00186931	131.5	N	LVEAEQAKVFSHRGGNVTLPCKFYRDPTAFG	X;X;X;X;X;X;X;X;X;X;X;X;X;X;X;Deamidation 18O (N);X;X;X;X;X;X;X;X;X;X;X;X;X;X;X
193	A0A024RAK9	Hyaluronan and proteoglycan link protein 1, isoform CRA_a	HAPLN1 hCG_39210	A0A024RAK9	0.517904	0.311153	3.57212e-05	61.101	51.131	61.101	0.5	0	0.00153282	52.402	0.517904	0.311153	3.57212e-05	61.101	0.5	0	0.00726241	44.05																									N	LQGVVFPYFPRLGRYNLNFHEAQQACLDQDA	X;X;X;X;X;X;X;X;X;X;X;X;X;X;X;Deamidation 18O (N);X;X;X;X;X;X;X;X;X;X;X;X;X;X;X
194	A0A024RAK9	Hyaluronan and proteoglycan link protein 1, isoform CRA_a	HAPLN1 hCG_39210	A0A024RAK9	0.5	0	0.00153282	52.402	46.972	44.05	0.5	0	0.00153282	52.402					0.5	0	0.00726241	44.05																									N	GVVFPYFPRLGRYNLNFHEAQQACLDQDAVI	X;X;X;X;X;X;X;X;X;X;X;X;X;X;X;X;X;X;X;X;X;X;X;X;X;X;X;X;X;X;X
195	D6RGZ6	Versican core protein (Fragment)	VCAN	D6RGZ6	1	246.26	1.96326e-117	267.75	230.56	246.26	1	199.432	1.80071e-16	199.43	1	98.9017	4.76483e-93	267.75	1	69.7206	1.07993e-40	231.83	1	227.311	3.10792e-40	227.31	1	159.99	3.72239e-24	159.99	1	151.976	4.39355e-52	241.17	1	218.752	1.96326e-117	262	1	225.787	5.86457e-93	267.02	1	246.26	1.66351e-64	246.26	N	CGGGLLGVRTLYRFENQTGFPPPDSRFDAYC	X;X;X;X;X;X;X;X;X;X;X;X;X;X;X;Deamidation 18O (N);X;X;X;X;X;X;X;X;X;X;X;X;X;X;X
196	D6RGZ6	Versican core protein (Fragment)	VCAN	D6RGZ6	1	155.733	1.53967e-102	237.24	210.09	155.73					1	45.125	0.00657772	45.125	1	129.245	1.84821e-15	129.24	1	208.115	3.92528e-70	208.12									1	142.25	4.95291e-52	177.6	1	159.662	1.53967e-102	237.24	1	155.733	3.60973e-49	168.55	N	AEARRGQFESVAPSQNFSDSSESDTHPFVIA	X;X;X;X;X;X;X;X;X;X;X;X;X;X;X;Deamidation 18O (N);X;X;X;X;X;X;X;X;X;X;X;X;X;X;X
197	F5GYV0	Epithelial membrane protein 1 (Fragment)	EMP1	F5GYV0	1	89.0761	1.75489e-225	312.78	297.68	312.78													0.89537	9.32348	0.00844283	65.805	0.989753	19.8492	1.85964e-11	120.3					0.999996	54.1229	2.25599e-104	256.52	1	66.0617	6.41377e-157	284.51	1	89.0761	1.75489e-225	312.78	N	WLVSNTVDASVGLWKNCTNISCSDSLSYASE	X;X;X;X;X;X;X;X;X;X;X;X;X;X;X;Deamidation 18O (N);X;X;X;X;X;X;X;X;X;X;X;X;X;X;X
198	B2R627	cDNA, FLJ92752, highly similar to Homo sapiens integrin, alpha 5 (fibronectin receptor, alphapolypeptide) (ITGA5), mRNA		B2R627	1	157.628	1.56013e-200	302.73	281.77	157.63													1	160.976	2.67795e-38	160.98									1	185.715	3.59251e-41	185.71	1	157.628	1.56013e-200	302.73					N	EPLSDPVGTCYLSTDNFTRILEYAPCRSDFS	X;X;X;X;X;X;X;X;X;X;X;X;X;X;X;Deamidation 18O (N);X;X;X;X;X;X;X;X;X;X;X;X;X;X;X
199	B2R627	cDNA, FLJ92752, highly similar to Homo sapiens integrin, alpha 5 (fibronectin receptor, alphapolypeptide) (ITGA5), mRNA		B2R627	1	147.18	7.28315e-53	201.95	178.1	147.18	1	130.068	4.46199e-12	130.07	1	134.207	4.59274e-09	134.21	1	128.313	7.03875e-12	128.31	1	201.954	3.30876e-29	201.95					1	95.5076	0.0109531	95.508	1	176.252	7.28315e-53	176.25	1	171.288	1.24466e-19	171.29	1	147.18	1.33602e-13	147.18	N	SGDDTEDFVAGVPKGNLTYGYVTILNGSDIR	X;X;X;X;X;X;X;X;X;X;X;X;X;X;X;Deamidation 18O (N);X;X;X;X;X;X;X;X;X;Deamidation 18O (N);X;X;X;X;X
200	B2R627	cDNA, FLJ92752, highly similar to Homo sapiens integrin, alpha 5 (fibronectin receptor, alphapolypeptide) (ITGA5), mRNA		B2R627	1	147.18	7.28315e-53	201.95	178.1	147.18	1	130.068	4.46199e-12	130.07	1	134.207	4.59274e-09	134.21	1	128.313	7.03875e-12	128.31	1	201.954	3.30876e-29	201.95					1	95.5076	0.0109531	95.508	1	176.252	7.28315e-53	176.25	1	171.288	1.24466e-19	171.29	1	147.18	1.33602e-13	147.18	N	GVPKGNLTYGYVTILNGSDIRSLYNFSGEQM	X;X;X;X;X;Deamidation 18O (N);X;X;X;X;X;X;X;X;X;Deamidation 18O (N);X;X;X;X;X;X;X;X;X;X;X;X;X;X;X
201	B2R627	cDNA, FLJ92752, highly similar to Homo sapiens integrin, alpha 5 (fibronectin receptor, alphapolypeptide) (ITGA5), mRNA		B2R627	1	194.185	0	429.74	404.54	194.19	1	142.975	1.31812e-18	142.97	1	143.566	1.22852e-18	143.57	1	131.539	5.98483e-12	131.54	1	100.389	5.04408e-28	171.91	1	106.748	3.33405e-05	106.75	1	118.368	3.09859e-08	118.37	1	195.971	9.83268e-35	195.97	1	182.763	0	429.74	1	194.185	2.10013e-34	194.19	N	APPEAEYSGLVRHPGNFSSLSCDYFAVNQSR	X;X;X;X;X;X;X;X;X;X;X;X;X;X;X;Deamidation 18O (N);X;X;X;X;X;X;X;X;X;X;X;Deamidation 18O (N);X;X;X
202	B2R627	cDNA, FLJ92752, highly similar to Homo sapiens integrin, alpha 5 (fibronectin receptor, alphapolypeptide) (ITGA5), mRNA		B2R627	1	194.185	0	429.74	404.54	194.19	1	142.975	1.31812e-18	142.97	1	143.566	1.22852e-18	143.57	1	131.539	5.98483e-12	131.54	1	100.389	5.04408e-28	171.91	1	106.748	3.33405e-05	106.75	1	118.368	3.09859e-08	118.37	1	195.971	9.83268e-35	195.97	1	182.763	0	429.74	1	194.185	2.10013e-34	194.19	N	HPGNFSSLSCDYFAVNQSRLLVCDLGNPMKA	X;X;X;Deamidation 18O (N);X;X;X;X;X;X;X;X;X;X;X;Deamidation 18O (N);X;X;X;X;X;X;X;X;X;X;X;X;X;X;X
203	B2R627	cDNA, FLJ92752, highly similar to Homo sapiens integrin, alpha 5 (fibronectin receptor, alphapolypeptide) (ITGA5), mRNA		B2R627	0.999902	40.1008	3.27099e-41	179.47	151.26	179.47													0.999902	40.1008	3.27099e-41	179.47					0.941312	12.1691	0.00565364	63.115													N	FGEQNHVYLGDKNALNLTFHAQNVGEGGAYE	X;X;X;X;X;X;X;X;X;X;X;X;X;X;X;Deamidation 18O (N);X;X;X;X;X;X;X;X;X;X;X;X;X;X;X
204	B2R627	cDNA, FLJ92752, highly similar to Homo sapiens integrin, alpha 5 (fibronectin receptor, alphapolypeptide) (ITGA5), mRNA		B2R627	0.999999	59.113	6.33692e-182	247.08	206.1	247.08	0.998126	27.5932	0.000768361	118.28	0.997991	27.0022	5.34021e-07	131.83					0.999993	53.6889	9.63362e-32	224.58	0.999981	49.3448	2.88459e-117	215.89	0.997759	27.1089	2.19613e-06	127.83	0.999999	59.113	6.33692e-182	247.08	0.999984	49.8611	9.27899e-17	202.96	0.999896	39.8306	5.65194e-18	206.49	N	KKTIQFDFQILSKNLNNSQSDVVSFRLSVEA	X;X;X;X;X;X;X;X;X;X;X;X;X;X;X;Deamidation 18O (N);X;X;X;X;X;X;X;X;X;X;X;X;X;X;X
205	B2R627	cDNA, FLJ92752, highly similar to Homo sapiens integrin, alpha 5 (fibronectin receptor, alphapolypeptide) (ITGA5), mRNA		B2R627	1	96.7408	2.18793e-156	291.22	258.7	291.22	0.999994	51.9943	3.15818e-08	140.08	0.999865	38.702	0.000110884	115.78	0.999783	36.6276	2.7526e-05	123.38	0.996427	24.4603	0.00176697	81.619	0.999934	41.8031	1.2648e-05	127.26	0.999875	39.0272	1.84552e-05	124.45	0.999996	54.5383	3.95683e-14	157.75	1	96.7408	2.18793e-156	291.22	0.999654	34.6047	6.50582e-06	130.24	N	LEGQQLLYVTRVTGLNCTTNHPINPKGLELD	X;X;X;X;X;X;X;X;X;X;X;X;X;X;X;Deamidation 18O (N);X;X;X;X;X;X;X;X;X;X;X;X;X;X;X
206	F8VV56	CD63 antigen	CD63	F8VV56	1	252.824	6.39396e-72	252.82	241.66	252.82	1	160.754	1.04644e-05	160.75	1	173.236	1.47564e-05	173.24	1	237.839	2.28638e-46	237.84	1	82.0285	1.20098e-05	137.28	1	123.513	0.000307424	123.51	1	87.5679	0.00724722	87.568	1	238.734	1.91916e-46	238.73	1	205.176	2.10925e-13	205.18	1	252.824	6.39396e-72	252.82	N	ILDRMQADFKCCGAANYTDWEKIPSMSKNRV	X;X;X;X;X;X;X;X;X;X;X;X;X;X;X;Deamidation 18O (N);X;X;X;X;X;X;X;X;X;X;X;X;X;X;X
207	F8VV56	CD63 antigen	CD63	F8VV56	0.5	0	0.000311006	152.54	111.82	152.54	0.5	0	0.00388802	101.3	0.5	0	0.000311006	152.07	0.5	0	0.00753791	115.57	0.5	0	0.00389067	149.96	0.5	0	0.00145368	111.27	0.5	0	0.000376089	119.27	0.5	0	0.000457356	137.89	0.5	0	0.000323111	152.54					N	EFNNNFRQQMENYPKNNHTASILDRMQADFK	X;X;X;X;X;X;X;X;X;X;X;X;X;X;X;Deamidation 18O (N);X;X;X;X;X;X;X;X;X;X;X;X;X;X;X
208	F8VV56	CD63 antigen	CD63	F8VV56	0.992061	20.9676	1.34302e-127	290.2	216.96	282.13	0.5	0	0.00388802	101.3	0.5	0	0.000311006	152.07	0.982671	17.5363	0.00198112	169.58	0.992061	20.9676	8.11855e-110	282.13	0.980572	17.0304	8.13657e-11	178.54	0.723103	4.16882	0.000376089	119.27	0.5	0	0.000457356	137.89	0.990425	20.1468	1.34302e-127	290.2	0.762993	5.0776	1.35984e-16	215.72	N	FNNNFRQQMENYPKNNHTASILDRMQADFKC	X;X;X;X;X;X;X;X;X;X;X;X;X;X;X;Deamidation 18O (N);X;X;X;X;X;X;X;X;X;X;X;X;X;X;X
209	F8VV56	CD63 antigen	CD63	F8VV56	1	161.017	3.85022e-253	325.79	311.76	263.75	1	178.395	1.64368e-251	318.18	1	173.582	3.01783e-225	309.88	1	159.828	2.94743e-225	310.04	1	192.997	3.85022e-253	325.79					1	68.2191	4.83049e-10	114.63	1	105.178	1.4832e-30	179.33	1	184.66	3.85022e-253	325.79	1	161.017	6.55544e-120	263.75	N	IPSMSKNRVPDSCCINVTVGCGINFNEKAIH	X;X;X;X;X;X;X;X;X;X;X;X;X;X;X;Deamidation 18O (N);X;X;X;X;X;X;X;X;X;X;X;X;X;X;X
210	H0YFA9	N-acetylglucosamine-6-sulfatase (Fragment)	GNS	H0YFA9	1	44.2994	0.0206118	67.08	55.547	44.299													1	67.0795	0.0206118	67.08	1	55.4006	0.0305525	55.401	1	44.2994	0.0417989	44.299													N	DIKVPLLVRGPGIKPNQTSKRGASNLTWRSD	X;X;X;X;X;X;X;X;X;X;X;X;X;X;X;Deamidation 18O (N);X;X;X;X;X;X;X;X;X;X;X;X;X;X;X
211	H0YFA9	N-acetylglucosamine-6-sulfatase (Fragment)	GNS	H0YFA9	0.999998	57.2474	0.00165843	88.075	75.067	88.075													0.999998	57.2474	0.00165843	88.075																					N	TNKHWLIRQAKTPMTNSSIQFLDNAFRKRWQ	X;X;X;X;X;X;X;X;X;X;X;X;X;X;X;Deamidation 18O (N);X;X;X;X;X;X;X;X;X;X;X;X;X;X;X
212	B3KTQ2	cDNA FLJ38589 fis, clone HCHON2010074, highly similar to LACTADHERIN		B3KTQ2	1	68.428	5.44478e-128	279.77	241.53	237.41	0.999997	55.9706	1.96696e-80	246.63	0.999979	46.7599	1.82689e-22	184.96	0.999997	55.8052	1.00411e-36	208.27	0.999979	46.7599	1.82689e-22	184.96									0.999674	34.8647	2.10254e-21	177.83	1	64.0452	5.44478e-128	279.77	1	68.428	2.51496e-67	237.41	N	HTACTLRFELLGCELNGCANPLGLKNNSIPD	X;X;X;X;X;X;X;X;X;X;X;X;X;X;X;Deamidation 18O (N);X;X;X;X;X;X;X;X;X;Deamidation 18O (N);X;X;X;X;X
213	B3KTQ2	cDNA FLJ38589 fis, clone HCHON2010074, highly similar to LACTADHERIN		B3KTQ2	1	116.372	7.31349e-10	200.6	162.88	116.37					1	96.3311	0.00728814	96.331					1	102.062	0.00368744	102.06	1	165.975	0.00166773	165.98	1	52.4897	0.00108205	176.38	1	200.603	7.31349e-10	200.6	1	200.603	7.31349e-10	200.6	1	116.372	0.00119982	116.37	N	VFPSYTCTCLKGYAGNHCETKCVEPLGMENG	X;X;X;X;X;X;X;X;X;X;X;X;X;X;X;Deamidation 18O (N);X;X;X;X;X;X;X;X;X;X;X;X;X;X;X
214	B3KTQ2	cDNA FLJ38589 fis, clone HCHON2010074, highly similar to LACTADHERIN		B3KTQ2	0.985829	18.424	0.000647465	92.264	81.144	89.982									0.985829	18.424	0.000647465	89.982																	0.82388	6.70056	0.000660038	92.264					N	DVNKKHKEFVGNWNKNAVHVNLFETPVEAQY	X;X;X;X;X;X;X;X;X;X;X;X;X;X;X;Deamidation 18O (N);X;X;X;X;X;X;X;X;X;X;X;X;X;X;X
215	B3KTQ2	cDNA FLJ38589 fis, clone HCHON2010074, highly similar to LACTADHERIN		B3KTQ2	1	139.174	0	344.48	327.43	344.48	1	139.174	0	344.48	1	66.6824	2.13491e-116	239.87					0.999948	42.8725	2.6168e-09	118.33					0.999989	49.5816	4.04515e-110	270.21					1	76.3246	9.87581e-21	171.56	0.997691	26.356	0.000638766	88.593	N	FGSVQFVASYKVAYSNDSANWTEYQDPRTGS	X;X;X;X;X;X;X;X;X;X;X;X;X;X;X;Deamidation 18O (N);X;X;X;X;X;X;X;X;X;X;X;X;X;X;X
216	B3KTQ2	cDNA FLJ38589 fis, clone HCHON2010074, highly similar to LACTADHERIN		B3KTQ2	1	146.596	0	397.27	387.48	397.27					1	86.9371	1.37774e-266	326.81	1	146.596	0	397.27	1	98.6372	0	356.59									1	118.678	2.93539e-213	312.92	1	94.2648	1.20209e-188	300.07	1	111.18	0	347.29	N	QFVASYKVAYSNDSANWTEYQDPRTGSSKIF	X;X;X;X;X;X;X;X;X;X;X;X;X;X;X;Deamidation 18O (N);X;X;X;X;X;X;X;X;X;X;X;X;X;X;X
217	A0A024RC61	Aminopeptidase (EC 3.4.11.-)	ANPEP hCG_27217	A0A024RC61	1	84.6583	2.12579e-13	175.49	175.49	84.658													1	88.1865	6.59405e-05	170.02	1	133.912	0.00812731	133.91	1	78.692	0.00631237	78.692	1	127.917	5.44413e-05	127.92	1	175.49	2.12579e-13	175.49	1	84.6583	0.00237712	97.911	N	KSFPCFDEPAMKAEFNITLIHPKDLTALSNM	X;X;X;X;X;X;X;X;X;X;X;X;X;X;X;Deamidation 18O (N);X;X;X;X;X;X;X;X;X;X;X;X;X;X;X
218	A0A024RC61	Aminopeptidase (EC 3.4.11.-)	ANPEP hCG_27217	A0A024RC61	0.999942	42.3678	1.47941e-76	226.71	208.42	226.71													0.999942	42.3678	1.47941e-76	226.71	0.823626	6.69296	0.0434306	47.472	0.999131	30.6081	5.89892e-39	168.64	0.993435	21.7991	8.49055e-45	191.65	0.999879	39.1621	2.24258e-57	212.26	0.999795	36.879	2.74483e-39	174	N	LPKGPSTPLPEDPNWNVTEFHTTPKMSTYLL	X;X;X;X;X;X;X;X;X;X;X;X;X;X;X;Deamidation 18O (N);X;X;X;X;X;X;X;X;X;X;X;X;X;X;X
219	A0A024RC61	Aminopeptidase (EC 3.4.11.-)	ANPEP hCG_27217	A0A024RC61	1	79.9855	5.11985e-31	230.24	177.08	79.986													1	132.01	5.11985e-31	230.24	1	111.607	0.00137527	111.61	1	86.8981	0.0066154	86.898					1	114.401	0.000733631	114.4	1	79.9855	0.0113083	79.986	N	CKEATDVIIIHSKKLNYTLSQGHRVVLRGVG	X;X;X;X;X;X;X;X;X;X;X;X;X;X;X;Deamidation 18O (N);X;X;X;X;X;X;X;X;X;X;X;X;X;X;X
220	A0A024RC61	Aminopeptidase (EC 3.4.11.-)	ANPEP hCG_27217	A0A024RC61	1	171.931	1.62012e-29	193.38	167.64	193.38													1	171.931	2.80018e-06	193.38					1	90.3449	0.00444619	108.57					1	133.981	1.62012e-29	161.28					N	QGGEEEWDFAWEQFRNATLVNEADKLRAALA	X;X;X;X;X;X;X;X;X;X;X;X;X;X;X;Deamidation 18O (N);X;X;X;X;X;X;X;X;X;X;X;X;X;X;X
221	A0A024RC61	Aminopeptidase (EC 3.4.11.-)	ANPEP hCG_27217	A0A024RC61	0.99989	39.5714	0	367.86	336.38	367.86													0.99989	39.5714	0	367.86	0.998993	29.9635	1.42333e-214	316.61	0.99816	27.3449	1.28073e-127	279.77													N	FNLASAHKVPVTLALNNTLFLIEERQYMPWE	X;X;X;X;X;X;X;X;X;X;X;X;X;X;X;Deamidation 18O (N);X;X;X;X;X;X;X;X;X;X;X;X;X;X;X
222	E9PJC8	Tetraspanin (Fragment)	CD151	E9PJC8	0.827709	6.81615	2.00575e-14	117.22	112.55	117.22													0.827709	6.81615	2.00575e-14	117.22																					N	SAVDQLQQEFHCCGSNNSQDWRDSEWI____	X;X;X;X;X;X;X;X;X;X;X;X;X;X;X;Deamidation 18O (N);X;X;X;X;X;X;X;X;X;X;X;X;X;X;X
223	A0A087WYV6	Tetraspanin-6	TSPAN6	A0A087WYV6	1	96.0269	0.00188702	139.74	129.33	96.027					1	85.1608	0.023152	85.161	1	139.74	0.00232469	139.74	1	130.279	0.00188702	130.28	1	96.0269	0.018017	96.027																	N	KNSFKNNYEKALKQYNSTGDYRSHAVDKIQN	X;X;X;X;X;X;X;X;X;X;X;X;X;X;X;Deamidation 18O (N);X;X;X;X;X;X;X;X;X;X;X;X;X;X;X
224	A0A1W2PQR6	Lysosome membrane protein 2	SCARB2	A0A1W2PQR6	1	129.277	3.54616e-94	256.04	213.83	256.04	0.999999	60.6264	9.83458e-21	171.29	0.999994	52.4699	1.79943e-25	192.86					1	129.277	3.54616e-94	256.04					1	78.3249	2.44824e-21	177.54	0.999999	61.3305	9.22194e-05	109.44	1	101.711	1.18737e-36	206.88	1	68.3399	9.37071e-26	195.1	N	TYRELRNKANIQFGDNGTTISAVSNKAYVFE	X;X;X;X;X;X;X;X;X;X;X;X;X;X;X;Deamidation 18O (N);X;X;X;X;X;X;X;X;X;X;X;X;X;X;X
225	A0A1W2PQR6	Lysosome membrane protein 2	SCARB2	A0A1W2PQR6	1	84.8965	1.76554e-21	176.21	167.17	176.21	0.999995	52.8014	0.000647086	89.913									1	72.9826	5.94784e-15	145.91					0.999942	42.3513	0.00422372	69.188	0.999976	46.19	1.74018e-11	141.6	1	84.8965	1.76554e-21	176.21	1	65.2999	7.02544e-21	158.45	N	KTSLDWWITDKCNMINGTDGDSFHPLITKDE	X;X;X;X;X;X;X;X;X;X;X;X;X;X;X;Deamidation 18O (N);X;X;X;X;X;X;X;X;X;X;X;X;X;X;X
226	A0A1W2PQR6	Lysosome membrane protein 2	SCARB2	A0A1W2PQR6	1	118.239	7.10143e-08	130.27	108.26	118.24	1	97.2844	8.15221e-05	97.284					1	76.768	0.000790473	76.768	1	61.4775	0.00011549	106.16	1	101.743	0.000483924	101.74	1	63.4596	0.000483924	101.74	1	116.081	4.53561e-06	116.08	1	118.239	7.10143e-08	130.27					N	ETGDIRTMVFPVMYLNESVHIDKETASRLKS	X;X;X;X;X;X;X;Oxidation (M);X;X;X;X;Oxidation (M);X;X;Deamidation 18O (N);X;X;X;X;X;X;X;X;X;X;X;X;X;X;X
227	B4E3A7	cDNA FLJ52057, highly similar to Periostin		B4E3A7	1	169.795	1.0551e-58	244.06	195.27	244.06													1	169.795	1.0551e-58	244.06	0.999999	62.1073	0.00405679	107.24	1	148.566	9.76813e-19	211.64	1	149.107	2.86792e-19	214.64	1	139.173	5.85069e-19	213.35	1	146.762	2.86792e-19	214.64	N	ILKTTQGSKIFLKEVNDTLLVNELKSKESDI	X;X;X;X;X;X;X;X;X;X;X;X;X;X;X;Deamidation 18O (N);X;X;X;X;X;X;X;X;X;X;X;X;X;X;X
228	U3KPX5	Integrin beta-like protein 1 (Fragment)	ITGBL1	U3KPX5	1	327.145	2.7853e-217	327.15	266.71	327.15													1	280.835	6.17518e-109	280.83					1	199.807	8.16642e-79	199.81	1	327.145	2.7853e-217	327.15									N	ERGWFGKLCQHPRKCNMTEEQSKNLCESADG	X;X;X;X;X;X;X;X;X;X;X;X;X;X;X;Deamidation 18O (N);X;X;X;X;X;X;X;X;X;X;X;X;X;X;X
229	B3KRY3	cDNA FLJ35079 fis, clone PLACE6005283, highly similar to Lysosome-associated membrane glycoprotein 1		B3KRY3	1	84.9155	1.41669e-29	234.47	159.28	84.916	1	163.985	0.0361994	163.99	1	140.139	0.0398066	140.14					1	234.471	1.41669e-29	234.47	1	154.118	0.0274282	154.12	1	84.9155	0.0419142	84.916	1	117.177	0.0149906	117.18	1	110.136	0.02875	110.14					N	ASMGLQLNLTYERKDNTTVTRLLNINPNKTS	X;X;X;X;X;X;X;X;X;X;X;X;X;X;X;Deamidation 18O (N);X;X;X;X;X;X;X;X;X;X;X;X;X;X;X
230	B3KRY3	cDNA FLJ35079 fis, clone PLACE6005283, highly similar to Lysosome-associated membrane glycoprotein 1		B3KRY3	1	159.445	3.09358e-31	218.06	172.25	159.44	1	67.6563	0.0239931	67.656					1	171.322	3.80724e-09	171.32	1	218.062	3.09358e-31	218.06	1	118.278	4.05006e-11	137.89	1	158.3	2.22593e-09	158.3	1	127.559	6.58914e-05	127.56	1	135.098	6.68511e-07	135.1	1	159.445	2.35332e-09	159.44	N	SDATVVLNRSSCGKENTSDPSLVIAFGRGHT	X;X;X;X;X;X;X;Deamidation 18O (N);X;X;X;X;X;X;X;Deamidation 18O (N);X;X;X;X;X;X;X;X;X;X;X;X;X;X;X
231	B3KRY3	cDNA FLJ35079 fis, clone PLACE6005283, highly similar to Lysosome-associated membrane glycoprotein 1		B3KRY3	1	223.927	3.67865e-112	223.93	170.05	223.93	1	182.391	0.000436734	182.39	1	124.743	0.000310143	124.74	1	182.646	0.000418334	182.65	1	217.504	4.71396e-22	217.5	1	97.9655	0.000755054	120.12	1	175.913	0.00115117	175.91	1	172.594	0.00164066	172.59	1	162.636	1.84367e-15	213.53	1	223.927	3.67865e-112	223.93	N	PSLVIAFGRGHTLTLNFTRNATRYSVQLMSF	X;X;X;X;X;X;X;X;X;X;X;X;X;X;X;Deamidation 18O (N);X;X;X;X;X;X;X;X;X;X;X;X;X;X;X
232	B3KRY3	cDNA FLJ35079 fis, clone PLACE6005283, highly similar to Lysosome-associated membrane glycoprotein 1		B3KRY3	1	126.832	1.34465e-15	184.1	165.35	126.83																													1	126.832	1.34465e-15	184.1					N	SAAFSVNYDTKSGPKNMTFDLPSDATVVLNR	X;X;X;X;X;X;X;X;X;X;X;X;X;X;X;Deamidation 18O (N);Oxidation (M);X;X;X;X;X;X;X;X;X;X;X;X;Deamidation 18O (N);X
233	B3KRY3	cDNA FLJ35079 fis, clone PLACE6005283, highly similar to Lysosome-associated membrane glycoprotein 1		B3KRY3	1	126.832	1.34465e-15	184.1	165.35	126.83																													1	126.832	1.34465e-15	184.1					N	KNMTFDLPSDATVVLNRSSCGKENTSDPSLV	X;Deamidation 18O (N);Oxidation (M);X;X;X;X;X;X;X;X;X;X;X;X;Deamidation 18O (N);X;X;X;X;X;X;X;Deamidation 18O (N);X;X;X;X;X;X;X
234	Q29900	HLA-DR (Fragment)		Q29900	1	76.1697	0.00426541	105.36	101.47	76.17													1	105.358	0.00426541	105.36					1	76.1697	0.0209256	76.17													N	PEDFVYQFKGMCYFTNGTERVRLVSRSIYNR	X;X;X;X;X;X;X;X;X;X;X;X;X;X;X;Deamidation 18O (N);X;X;X;X;X;X;X;X;X;X;X;X;X;X;X
235	V5NQS1	Truncated MHC class I antigen	HLA-C	V5NQS1	1	132.567	0.00185393	132.57	124.88	132.57													1	132.567	0.00185393	132.57																					N	AQTDRVSLRNLRGYYNQSEARSHIIQRMYGC	X;X;X;X;X;X;X;X;X;X;X;X;X;X;X;Deamidation 18O (N);X;X;X;X;X;X;X;X;X;X;X;X;X;X;X
236	O19189	HLA-B protein (Fragment)	HLA-B	O19189	1	151.721	5.79801e-80	224.53	151.72	224.53																													1	151.721	5.79801e-80	224.53					N	AQTDRENLRIALRYYNQSEAGSHTLQNMYGC	X;X;X;X;X;X;X;X;X;X;X;X;X;X;X;Deamidation 18O (N);X;X;X;X;X;X;X;X;X;X;X;X;X;X;X
237	P04062	Lysosomal acid glucosylceramidase (Lysosomal acid GCase) (EC 3.2.1.45) (Acid beta-glucosidase) (Alglucerase) (Beta-glucocerebrosidase) (Beta-GC) (Cholesterol glucosyltransferase) (SGTase) (EC 2.4.1.-) (Cholesteryl-beta-glucosidase) (EC 3.2.1.104) (D-glucosyl-N-acylsphingosine glucohydrolase) (Imiglucerase)	GBA GC GLUC	P04062	0.999958	43.8023	9.79379e-05	116.96	90.813	97.797	0.995349	23.3044	0.00189017	80.632	0.986237	18.5528	0.00576135	71.08	0.999958	43.8023	0.00128404	97.797	0.999863	38.6364	0.000641684	107.61	0.999799	36.9635	0.00105522	101.36	0.99814	27.2973	0.00111329	100.45	0.999795	36.8881	0.000417531	110.77	0.999917	40.818	0.00130847	97.417	0.999951	43.0744	9.79379e-05	116.96	N	HQRDFIARDLGPTLANSTHHNVRLLMLDDQR	X;X;X;X;X;X;X;X;X;X;X;X;X;X;X;Deamidation 18O (N);X;X;X;X;X;X;X;X;X;X;X;X;X;X;X
238	P04062	Lysosomal acid glucosylceramidase (Lysosomal acid GCase) (EC 3.2.1.45) (Acid beta-glucosidase) (Alglucerase) (Beta-glucocerebrosidase) (Beta-GC) (Cholesterol glucosyltransferase) (SGTase) (EC 2.4.1.-) (Cholesteryl-beta-glucosidase) (EC 3.2.1.104) (D-glucosyl-N-acylsphingosine glucohydrolase) (Imiglucerase)	GBA GC GLUC	P04062	1	140.114	1.79039e-20	140.11	125.53	140.11													1	58.3613	0.00583642	58.361									1	40.6255	0.0235519	40.626	1	140.114	1.79039e-20	140.11					N	RTYTYADTPDDFQLHNFSLPEEDTKLKIPLI	X;X;X;X;X;X;X;X;X;X;X;X;X;X;X;Deamidation 18O (N);X;X;X;X;X;X;X;X;X;X;X;X;X;X;X
239	A0A075B728	Platelet endothelial cell adhesion molecule (Fragment)	PECAM1	A0A075B728	1	159.276	5.0124e-20	159.28	134.35	159.28													1	116.372	0.00401031	116.37													1	159.276	5.0124e-20	159.28					N	TLDKKEAIQGGIVRVNCSVPEEKAPIHFTIE	X;X;X;X;X;X;X;X;X;X;X;X;X;X;X;Deamidation 18O (N);X;X;X;X;X;X;X;X;X;X;X;X;X;X;X
240	Q6QIN1	CD45 (Fragment)	PTPRC	Q6QIN1	1	174.045	4.3793e-13	203.52	189.71	203.52													1	109.312	8.9693e-06	146.79					1	95.1428	0.000451584	122.26					1	174.045	4.3793e-13	203.52	1	104.283	6.44772e-09	133.76	N	___________EKYANITVDYLYNKETKLFT	X;X;X;X;X;X;X;X;X;X;X;X;X;X;X;Deamidation 18O (N);X;X;X;X;X;X;X;X;X;X;X;X;X;X;X
241	A0A180H729	MHC class II antigen (Fragment)	HLA-DPB1	A0A180H729	1	185.599	3.91035e-06	185.6	160.04	185.6													1	185.599	3.91035e-06	185.6																					N	__NYLFQGRQECYAFNGTQRFLERYIYNREE	X;X;X;X;X;X;X;X;X;X;X;X;X;X;X;Deamidation 18O (N);X;X;X;X;X;X;X;X;X;X;X;X;X;X;X
242	A0A087WSY5	Carboxypeptidase B2	CPB2	A0A087WSY5	1	113.222	7.00734e-60	243.11	188.05	243.11					0.999982	47.4385	0.00640376	70.927	0.998748	29.0189	0.0388743	44.567	1	113.222	7.00734e-60	243.11					0.999936	41.933	0.00255148	77.42	0.999988	49.3276	0.00199959	78.902	1	106.356	1.09953e-14	178.23					N	TADLIVKKKQVHFFVNASDVDNVKAHLNVSG	X;X;X;X;X;X;X;X;X;X;X;X;X;X;X;Deamidation 18O (N);X;X;X;X;X;X;X;X;X;X;X;X;X;X;X
243	A0A087WT00	CD302 antigen	CD302	A0A087WT00	0.99522	23.1849	3.2625e-05	144.77	104.42	138.08													0.977651	16.4093	3.2625e-05	144.77									0.99522	23.1849	3.5061e-05	138.08	0.991732	20.79	3.28553e-05	144.65	0.973515	15.6535	0.00631236	96.342	N	FYDTDDASFKWFDNSNMTFDKWTDQDDDEDL	X;X;X;X;X;X;X;X;X;X;X;X;X;X;X;Deamidation 18O (N);X;X;X;X;X;X;X;X;X;X;X;X;X;X;X
244	A0A087X1V2	Neural cell adhesion molecule 1 (Fragment)	NCAM1	A0A087X1V2	0.617409	2.07838	6.07474e-05	128.01	101.04	98.898													0.560172	1.05039	0.00667018	80.014													0.617409	2.07838	0.00222507	98.898	0.548261	0.84099	6.07474e-05	128.01	N	SWFRDGQLLPSSNYSNIKIYNTPSASYLEVT	X;X;X;X;X;X;X;X;X;X;X;X;X;X;X;Deamidation 18O (N);X;X;X;X;X;X;X;X;X;X;X;X;X;X;X
245	E9PPH3	Receptor-type tyrosine-protein phosphatase eta (Fragment)	PTPRJ	E9PPH3	1	77.379	0.00104941	138.08	128.69	77.379																													1	138.08	0.00104941	138.08	1	77.379	0.0325755	77.379	N	AVSISPTNVILTWKSNDTAASEYKYVVKHKM	X;X;X;X;X;X;X;X;X;X;X;X;X;X;X;Deamidation 18O (N);X;X;X;X;X;X;X;X;X;X;X;X;X;X;X
246	B7Z687	cDNA FLJ59293, highly similar to Roundabout homolog 1 (Fragment)		B7Z687	1	103.563	0.0198878	103.56	52.956	103.56													1	103.563	0.0198878	103.56																					N	TQNGMVQEYKVWCLGNETRYHINKTVDGSTF	X;X;X;X;X;X;X;X;X;X;X;X;X;X;X;Deamidation 18O (N);X;X;X;X;X;X;X;X;X;X;X;X;X;X;X
247	K9J972	FAS receptor variant 9 (Tumor necrosis factor receptor superfamily member 6)	FAS	K9J972	1	91.4567	0.000149582	91.457	79.539	91.457													1	91.4567	0.000149582	91.457																					N	RCRLCDEGHGLEVEINCTRTQNTKCRCKPNF	X;X;X;X;X;X;X;X;X;X;X;X;X;X;X;Deamidation 18O (N);X;X;X;X;X;X;X;X;X;X;X;X;X;X;X
248	A0A087WVS4	High affinity immunoglobulin gamma Fc receptor IB	FCGR1B	A0A087WVS4	1	101.954	4.37504e-23	213.34	182.27	101.95													1	213.344	4.37504e-23	213.34	1	73.7813	0.0299583	73.781	1	101.954	0.00445081	101.95													N	TQTSTPSYRITSASVNDSGEYRCQRGLSGRS	X;X;X;X;X;X;X;X;X;X;X;X;X;X;X;Deamidation 18O (N);X;X;X;X;X;X;X;X;X;X;X;X;X;X;X
249	A0A0C4DGM1	Tryptase alpha/beta-1 (Fragment)	TPSAB1	A0A0C4DGM1	0.999999	59.9168	7.9548e-05	60.521	53.945	60.521													0.999999	59.9168	7.9548e-05	60.521																					N	DSCQGDSGGPLVCKVNGTWLQAGVVSWGEGC	X;X;X;X;X;X;X;X;X;X;X;X;X;X;X;Deamidation 18O (N);X;X;X;X;X;X;X;X;X;X;X;X;X;X;X
250	A0A087WUZ2	IgGFc-binding protein	FCGBP	A0A087WUZ2	1	123.625	7.14857e-05	123.63	93.371	123.63													1	123.625	7.14857e-05	123.63																					N	NGRVSVTRVITVQVANFTLRLEQRQWKVTVN	X;X;X;X;X;X;X;X;X;X;X;X;X;X;X;Deamidation 18O (N);X;X;X;X;X;X;X;X;X;X;X;X;X;X;X
251	X6R6A3	Glycosylated lysosomal membrane protein	GLMP	X6R6A3	1	113.706	0.00203125	113.71	54.789	113.71													1	113.706	0.00203125	113.71																					N	TFQGHPMNDPTRTFANGSLAFRVQAFSRSSR	X;X;X;X;X;X;X;X;X;X;X;X;X;X;X;Deamidation 18O (N);X;X;X;X;X;X;X;X;X;X;X;X;X;X;X
252	A0A087WVP1	Protocadherin Fat 1	FAT1	A0A087WVP1	1	83.729	0.00223566	83.729	71.102	83.729																									1	83.729	0.00223566	83.729									N	ADITVHIRQVTQEMLNHTIAIRFANLTPEEF	X;X;X;X;X;X;X;X;X;X;X;X;X;X;X;Deamidation 18O (N);X;X;X;X;X;X;X;X;X;X;X;X;X;X;X
253	A0A087WW43	Inter-alpha-trypsin inhibitor heavy chain H3	ITIH3	A0A087WW43	1	128.11	8.04035e-09	154.65	138.51	154.65													1	126.181	3.48255e-08	152.85													1	128.11	8.04035e-09	154.65					N	QLLEKRKNAHGEEKENLTARALDLSLKYHFV	X;X;X;X;X;X;X;X;X;X;X;X;X;X;X;Deamidation 18O (N);X;X;X;X;X;X;X;X;X;X;X;X;X;X;X
254	A0A0G2JP90	Nodal modulator 1	NOMO1	A0A0G2JP90	1	89.9653	0.0119857	95.523	62.683	95.523													1	89.9653	0.0119857	95.523																					N	EFYQDGNGRENVGIYNLSKGVNRFCLSKPGV	X;X;X;X;X;X;X;X;X;X;X;X;X;X;X;Deamidation 18O (N);X;X;X;X;X;X;X;X;X;X;X;X;X;X;X
255	A0A0G2JP90	Nodal modulator 1	NOMO1	A0A0G2JP90	0.999999	59.6447	0.00246909	77.562	57.723	77.562													0.999999	59.6447	0.00246909	77.562																					N	NSNANAASPLIVAGYNVSGSVRSDGEPMKGV	X;X;X;X;X;X;X;X;X;X;X;X;X;X;X;Deamidation 18O (N);X;X;X;X;X;X;X;X;X;X;X;X;X;X;X
256	A0A087WYF1	Laminin subunit alpha-2	LAMA2	A0A087WYF1	1	82.7494	0.00750244	103.55	92.854	82.749													1	82.7494	0.0178376	82.749									1	103.546	0.00750244	103.55	1	82.7494	0.0178376	82.749					N	RCARGYTGYPDCKACNCSGLGSKNEDPCFGP	X;X;X;X;X;X;X;X;X;X;X;X;X;X;X;Deamidation 18O (N);X;X;X;X;X;X;X;X;X;X;X;X;X;X;X
257	A0A087WYF1	Laminin subunit alpha-2	LAMA2	A0A087WYF1	1	70.0319	3.19829e-114	220.39	190.65	220.39													0.99968	34.9757	1.45111e-05	173.37									1	70.0319	3.19829e-114	220.39									N	PGQPVRNPQCRICNQNSSNPNQRHPITNAID	X;X;X;X;X;X;X;X;X;X;X;X;X;X;X;Deamidation 18O (N);X;X;X;X;X;X;X;X;X;X;X;X;X;X;X
258	A0A087WYF1	Laminin subunit alpha-2	LAMA2	A0A087WYF1	1	138.545	0.0033655	138.54	54.93	138.54													1	83.2061	0.0284067	83.206									1	91.0642	0.022697	91.064	1	80.4381	0.0312609	80.438	1	138.545	0.0033655	138.54	N	LARDAEAVNEKAIKLNETLGTRDEAFERNLE	X;X;X;X;X;X;X;X;X;X;X;X;X;X;X;Deamidation 18O (N);X;X;X;X;X;X;X;X;X;X;X;X;X;X;X
259	A0A087WYF1	Laminin subunit alpha-2	LAMA2	A0A087WYF1	1	161.989	5.5604e-24	164.9	148.52	161.99													1	100.086	0.00209278	100.09									1	161.989	3.11362e-09	164.9	1	100.313	5.5604e-24	154.67	1	125.97	4.79892e-07	125.97	N	GIFTVQVDENRRYMQNLTVEQPIEVKKLFVG	X;X;X;X;X;X;X;X;X;X;X;X;X;Oxidation (M);X;Deamidation 18O (N);X;X;X;X;X;X;X;X;X;X;X;X;X;X;X
260	A0A087WXP0	Azurocidin	AZU1	A0A087WXP0	1	258.82	3.30373e-181	258.82	232.7	258.82	1	214.239	2.76883e-69	214.24	1	233.791	3.30373e-181	233.79	1	142.325	3.40008e-89	231.77																					1	258.82	2.64432e-129	258.82	N	QNLNDLMLLQLDREANLTSSVTILPLPLQNA	X;X;X;X;X;X;X;X;X;X;X;X;X;X;X;Deamidation 18O (N);X;X;X;X;X;X;X;X;X;X;X;X;X;Deamidation 18O (N);X
261	A0A087WXP0	Azurocidin	AZU1	A0A087WXP0	1	258.82	3.30373e-181	258.82	232.7	258.82	1	214.239	2.76883e-69	214.24	1	233.791	3.30373e-181	233.79	1	142.325	3.40008e-89	231.77																					1	258.82	2.64432e-129	258.82	N	ANLTSSVTILPLPLQNATVEAGTRCQVAGWG	X;Deamidation 18O (N);X;X;X;X;X;X;X;X;X;X;X;X;X;Deamidation 18O (N);X;X;X;X;X;X;X;X;X;X;X;X;X;X;X
262	Q8WW96	CFHR3 protein	CFHR3	Q8WW96	1	138.084	1.85591e-14	138.08	116.24	138.08	1	55.6879	0.0137871	55.688	1	99.0214	0.000453824	99.021					1	122.306	8.1537e-09	122.31	1	73.4642	0.00245835	73.464	1	98.7965	0.000467851	98.796	1	130.393	8.03879e-12	130.39	1	129.618	1.01496e-11	129.62	1	138.084	1.85591e-14	138.08	N	ENGYNQNYGRKFVQGNSTEVACHPGYGLPKA	X;X;X;X;X;X;X;X;X;X;X;X;X;X;X;Deamidation 18O (N);X;X;X;X;X;X;X;X;X;X;X;X;X;X;X
263	B4DTC0	cDNA FLJ53096, highly similar to Collagen alpha-2(V) chain		B4DTC0	1	110.135	3.11607e-08	192.64	145.29	110.14									1	76.4649	0.02007	76.465	1	192.639	3.11607e-08	192.64	1	131.439	4.04998e-05	131.44	1	163.877	4.43484e-05	163.88	1	118.712	0.00071546	118.71	1	138.975	3.5446e-05	138.98	1	110.135	0.00276347	110.14	N	TQMTFLRLLSKEASQNITYICKNSVGYMDDQ	X;X;X;X;X;X;X;X;X;X;X;X;X;X;X;Deamidation 18O (N);X;X;X;X;X;X;X;X;X;X;X;X;X;X;X
264	Q8IV28	NID2 protein	NID2	Q8IV28	1	55.7239	0.000288245	100.07	86.262	55.724													1	74.1501	0.00824776	74.15					1	65.4951	0.0233661	65.495					1	100.071	0.00194302	100.07	1	55.7239	0.000288245	89.44	N	TSTSSRDYSLTFGAINQTWSYRIHQNITYQV	X;X;X;X;X;X;X;X;X;X;X;X;X;X;X;Deamidation 18O (N);X;X;X;X;X;X;X;X;X;Deamidation 18O (N);X;X;X;X;X
265	Q8IV28	NID2 protein	NID2	Q8IV28	1	278.015	3.44375e-102	278.02	240.54	278.02	1	112.129	0.000924724	112.13	1	131.819	1.71478e-05	155.06	1	123.792	4.94669e-05	123.79	1	172.804	2.1913e-05	172.8	1	156.48	1.18287e-05	156.48	1	123.86	0.000104484	123.86	1	166.549	2.36285e-05	166.55	1	275.012	8.39623e-102	275.01	1	278.015	3.44375e-102	278.02	N	TFGAINQTWSYRIHQNITYQVCRHAPRHPSF	X;X;X;X;X;Deamidation 18O (N);X;X;X;X;X;X;X;X;X;Deamidation 18O (N);X;X;X;X;X;X;X;X;X;X;X;X;X;X;X
266	A0A087X0A8	Collagen alpha-1(XII) chain	COL12A1	A0A087X0A8	1	127.777	1.16565e-142	260.19	222.64	127.78	1	120.838	8.29872e-14	156.36	1	139.885	7.76222e-08	139.89	1	158.399	9.32526e-14	158.4	1	260.194	1.16565e-142	260.19	1	70.4884	0.00251617	86.911	1	150.485	3.22096e-12	150.49	1	150.893	7.57625e-14	174.9	1	83.6173	3.08858e-29	214.23	1	127.777	4.98438e-06	127.78	N	IDCYEIIEKDIKEAGNITTDGYEILGKLLKG	X;X;X;X;X;X;X;X;X;X;X;X;X;X;X;Deamidation 18O (N);X;X;X;X;X;X;X;X;X;X;X;X;X;X;X
267	A0A087X0A8	Collagen alpha-1(XII) chain	COL12A1	A0A087X0A8	1	134.26	1.50286e-06	195.58	153.47	134.26	1	100.246	0.00946723	100.25	1	129.625	0.000595074	129.63	1	113.74	0.000430932	123.29	1	90.6291	0.000810827	180.27	1	77.6774	0.00109431	138.98	1	71.3491	1.50286e-06	195.58	1	146.231	0.00103265	146.68	1	139.979	0.00114464	139.98	1	134.26	0.000857928	144.79	N	LDGYTSPGFKMLEAYNLTEKNFASVQGVSLE	X;X;X;X;X;X;X;X;X;X;Oxidation (M);X;X;X;X;Deamidation 18O (N);X;X;X;X;X;X;X;X;X;X;X;X;X;X;X
268	A0A087X0A8	Collagen alpha-1(XII) chain	COL12A1	A0A087X0A8	0.999986	48.5503	3.53539e-29	213.38	176.03	210.91	0.999986	48.5503	7.00104e-29	210.91	0.999926	41.2999	1.01663e-17	190.53	0.997809	26.5844	1.89116e-18	196.24	0.999949	42.8926	3.74364e-18	194.96	0.990363	20.1186	2.91711e-05	127.17	0.999958	43.7217	3.53539e-29	213.38	0.999976	46.1368	1.11863e-22	203.51	0.99987	38.8608	1.89116e-18	196.24	0.99997	45.282	4.37427e-23	205.46	N	TTQAPKSGPRNLQVYNATSNSLTVKWDPASG	X;X;X;X;X;X;X;X;X;X;X;X;X;X;X;Deamidation 18O (N);X;X;X;X;X;X;X;X;X;X;X;X;X;X;X
269	Q6LAM1	Heavy chain of factor I (Fragment)		Q6LAM1	0.999566	33.6188	1.6081e-30	167.67	156.52	157.24					0.964019	14.2802	0.000179797	126.39	0.937921	11.7922	0.00957891	89.171	0.999479	32.8332	1.06975e-05	143.89	0.844299	7.34204	0.000640521	120.09	0.999566	33.6188	8.75876e-06	157.24	0.998935	29.7201	1.6081e-30	167.67	0.999263	31.323	1.08663e-05	161.17	0.998565	28.4256	1.13319e-05	142.83	N	QKSLECLHPGTKFLNNGTCTAEGKFSVSLKH	X;X;X;X;X;X;X;X;X;X;X;X;X;X;X;Deamidation 18O (N);X;X;X;X;X;X;X;X;X;X;X;X;X;X;X
270	Q6LAM1	Heavy chain of factor I (Fragment)		Q6LAM1	1	56.2147	0.0136699	56.215	36.662	56.215									1	45.1397	0.0310559	45.14									1	56.2147	0.0136699	56.215													N	GADTQRRFKLSDLSINSTECLHVHCRGLETS	X;X;X;X;X;X;X;X;X;X;X;X;X;X;X;Deamidation 18O (N);X;X;X;X;X;X;X;X;X;X;X;X;X;X;X
271	B4DHM2	cDNA FLJ57983, highly similar to Cat eye syndrome critical region protein 1		B4DHM2	1	183.03	1.38928e-09	183.03	129.26	183.03													1	144.55	1.16348e-08	144.55													1	183.03	1.38928e-09	183.03					N	CSKWILLEDYRKRVQNVTEFDDSLLRNFTLV	X;X;X;X;X;X;X;X;X;X;X;X;X;X;X;Deamidation 18O (N);X;X;X;X;X;X;X;X;X;X;X;X;X;X;X
272	A0A087X0S5	Collagen alpha-1(VI) chain	COL6A1	A0A087X0S5	0.999985	48.1736	6.01115e-20	115.2	107.2	106.66																									0.998691	28.8178	0.00067646	46.608	0.999985	48.1736	6.01115e-20	115.2	0.999576	33.7299	1.33922e-12	86.507	N	TGQQRPERASLQFLQNYTALASAVDAMDFIN	X;X;X;X;X;X;X;X;X;X;X;X;X;X;X;Deamidation 18O (N);X;X;X;X;X;X;X;X;X;X;X;X;X;X;Deamidation 18O (N)
273	A0A087X0S5	Collagen alpha-1(VI) chain	COL6A1	A0A087X0S5	0.998691	28.8178	0.00067646	46.608	39.407	46.608																									0.998691	28.8178	0.00067646	46.608									N	NYTALASAVDAMDFINDATDVNDALGYVTRF	Deamidation 18O (N);X;X;X;X;X;X;X;X;X;X;X;X;X;X;Deamidation 18O (N);X;X;X;X;X;X;X;X;X;X;X;X;X;X;X
274	A0A087X0S5	Collagen alpha-1(VI) chain	COL6A1	A0A087X0S5	1	132.01	2.50355e-05	152.28	118.02	132.01													1	152.277	0.000719506	152.28	1	123.86	0.000311055	123.86	1	138.659	0.00107846	138.66	1	138.659	0.00107846	138.66	1	125.713	0.000366743	125.71	1	132.01	2.50355e-05	132.01	N	VKENYAELLEDAFLKNVTAQICIDKKCPDYT	X;X;X;X;X;X;X;X;X;X;X;X;X;X;X;Deamidation 18O (N);X;X;X;X;X;X;X;X;X;X;X;X;X;X;X
275	A0A087X0S5	Collagen alpha-1(VI) chain	COL6A1	A0A087X0S5	1	90.3698	0.0207718	90.37	45.678	90.37													1	90.3698	0.0207718	90.37																					N	PGFPGYPGNRGAPGINGTKGYPGLKGDEGEA	X;X;X;X;X;X;X;X;X;X;X;X;X;X;X;Deamidation 18O (N);X;X;X;X;X;X;X;X;X;X;X;X;X;X;X
276	A0A087X0S5	Collagen alpha-1(VI) chain	COL6A1	A0A087X0S5	1	307.974	1.06671e-178	307.97	239.96	307.97	1	84.3649	3.3587e-05	160.77	1	117.029	8.90591e-72	257.88	1	125.033	2.1267e-09	197.21	1	177.039	2.1267e-09	197.21	1	77.379	0.0174207	77.379	1	167.298	1.24656e-09	171.33	1	150.142	2.45668e-119	287.83	1	300.295	5.73543e-157	300.29	1	307.974	1.06671e-178	307.97	N	EPRLSIIATDHTYRRNFTAADWGQSRDAEEA	X;X;X;X;X;X;X;X;X;X;X;X;X;X;X;Deamidation 18O (N);X;X;X;X;X;X;X;X;X;X;X;X;X;X;X
277	F5H125	Cell adhesion molecule 1 (Fragment)	CADM1	F5H125	1	235.312	3.39551e-67	235.31	205.97	235.31													1	235.312	3.39551e-67	235.31																					N	VTVIEGEVATISCQVNKSDDSVIQLLNPNRQ	X;X;X;X;X;X;X;X;X;X;X;X;X;X;X;Deamidation 18O (N);X;X;X;X;X;X;X;X;X;X;X;X;X;X;X
278	F5H125	Cell adhesion molecule 1 (Fragment)	CADM1	F5H125	1	169.655	1.12542e-21	195.27	158.89	169.65																	1	172.56	1.59771e-05	172.56	1	195.267	4.50611e-09	195.27	1	155.115	1.12542e-21	155.11	1	169.655	2.0154e-05	169.65					N	FRDFRPLKDSRFQLLNFSSSELKVSLTNVSI	X;X;X;X;X;X;X;X;X;X;X;X;X;X;X;Deamidation 18O (N);X;X;X;X;X;X;X;X;X;X;X;Deamidation 18O (N);X;X;X
279	F5H125	Cell adhesion molecule 1 (Fragment)	CADM1	F5H125	1	105.032	3.07991e-40	227.37	189.07	105.03													1	227.373	3.07991e-40	227.37	1	71.0845	0.00798338	85.288	1	108.348	0.00323975	108.35	1	154.657	8.17264e-09	154.66	1	162.26	1.25342e-08	162.26	1	105.032	0.00414773	105.03	N	QLLNFSSSELKVSLTNVSISDEGRYFCQLYT	X;X;X;Deamidation 18O (N);X;X;X;X;X;X;X;X;X;X;X;Deamidation 18O (N);X;X;X;X;X;X;X;X;X;X;X;X;X;X;X
280	A0A087X191	Beta-1,3-N-acetylglucosaminyltransferase lunatic fringe	LFNG	A0A087X191	1	122.932	3.18844e-20	180.64	146.95	180.64	0.999824	37.5405	0.0206112	56.121	1	122.932	1.03238e-15	180.64	1	105.049	3.18844e-20	143.14									0.999999	62.7328	0.000904356	85.362	1	89.3384	4.51553e-06	125.45									N	EDEALARHTGNVVITNCSAAHSRQALSCKMA	X;X;X;X;X;X;X;X;X;X;X;X;X;X;X;Deamidation 18O (N);X;X;X;X;X;X;X;X;X;X;X;X;X;X;X
281	A0A087X1T7	Aggrecan core protein	ACAN	A0A087X1T7;P16112	1	220.239	8.23829e-204	220.24	196.5	220.24													1	92.4048	1.71633e-24	92.405									1	93.29	1.95075e-127	182.11	1	220.239	8.23829e-204	220.24					N	RYTLDFDRAQRACLQNSAIIATPEQLQAAYE	X;X;X;X;X;X;X;X;X;X;X;X;X;X;X;Deamidation 18O (N);X;X;X;X;X;X;X;X;X;X;X;X;X;X;X
282	A0A087X1T7	Aggrecan core protein	ACAN	A0A087X1T7;P16112	1	107.52	3.94198e-57	190.5	188.54	107.52	1	65.2747	0.000458392	71.297	1	107.52	2.18955e-10	107.52	1	88.3938	3.94198e-57	190.5													1	88.3938	1.79321e-11	96.466	1	139.218	3.75303e-22	139.22	1	134.972	8.60452e-22	134.97	N	KDEFPGVRTYGIRDTNETYDVYCFAEEMEGE	X;X;X;X;X;X;X;X;X;X;X;X;X;X;X;Deamidation 18O (N);X;X;X;X;X;X;X;X;X;X;X;Oxidation (M);X;X;X
283	A0A087X1T7	Aggrecan core protein	ACAN	A0A087X1T7;P16112	0.563017	0	2.01646e-63	164.35	151.94	81.28																													0.563017	0	2.01646e-63	164.35	0.545989	0	3.0925e-54	133.94	N	SHLSSIVTPEEQEFVNNNAQDYQWIGLNDRT	X;X;X;X;X;X;X;X;X;X;X;X;X;X;X;Deamidation 18O (N);X;Deamidation 18O (N);X;X;X;X;X;X;X;X;X;X;X;X;X
284	A0A087X1T7	Aggrecan core protein	ACAN	A0A087X1T7;P16112	0.563017	0	2.01646e-63	164.35	151.94	81.28																													0.563017	0	2.01646e-63	164.35	0.545989	0	3.0925e-54	133.94	N	HLSSIVTPEEQEFVNNNAQDYQWIGLNDRTI	X;X;X;X;X;X;X;X;X;X;X;X;X;X;X;X;X;X;X;X;X;X;X;X;X;X;X;X;X;X;X
285	A0A087X1T7	Aggrecan core protein	ACAN	A0A087X1T7;P16112	0.908022	6.93382	3.0925e-54	133.94	124.31	133.94																													0.873961	5.3997	1.14698e-13	81.28	0.908022	6.93382	3.0925e-54	133.94	N	LSSIVTPEEQEFVNNNAQDYQWIGLNDRTIE	X;X;X;X;X;X;X;X;X;X;X;X;X;Deamidation 18O (N);X;Deamidation 18O (N);X;X;X;X;X;X;X;X;X;X;X;X;X;X;X
286	A0A087X1T7	Aggrecan core protein	ACAN	A0A087X1T7;P16112	1	229.48	7.22867e-46	237.92	225.88	229.48	1	94.6921	4.67851e-05	166.19	1	117.698	1.74669e-06	187.16	1	87.2981	8.08192e-09	196.27	1	152.973	2.14351e-05	152.97	1	166.187	5.24668e-05	166.19	1	137.953	3.50067e-05	137.95	1	216.123	1.4936e-25	216.12	1	237.925	7.22867e-46	237.92	1	229.48	5.57336e-35	229.48	N	FYATSPEKFTFQEAANECRRLGARLATTGQL	X;X;X;X;X;X;X;X;X;X;X;X;X;X;X;Deamidation 18O (N);X;X;X;X;X;X;X;X;X;X;X;X;X;X;X
287	A0A087X1T7	Aggrecan core protein	ACAN	A0A087X1T7;P16112	1	98.9913	0	362.06	347.58	98.991	1	46.1488	0	362.06	1	86.675	0	356.79	1	47.1044	3.602e-272	312.35	1	133.228	0	326.56									1	207.232	2.19144e-85	207.23	1	112.905	6.26542e-182	278.48	1	98.9913	0	356.79	N	EQFTFQEALEFCESHNATLATTGQLYAAWSR	X;X;X;X;X;X;X;X;X;X;X;X;X;X;X;Deamidation 18O (N);X;X;X;X;X;X;X;X;X;X;X;X;X;X;X
288	A0A087X1T7	Aggrecan core protein	ACAN	A0A087X1T7;P16112	1	77.0577	0.00370569	180.44	117.72	77.058	1	81.2967	0.0303756	81.297	1	132.567	0.00370569	132.57	1	180.438	0.00412181	180.44	1	116.25	0.00804335	116.25	1	101.284	0.0183599	101.28					1	72.1384	0.00370569	132.57	1	97.7981	0.0200806	97.798	1	77.0577	0.00689588	119.29	N	VQTVTWPDMELPLPRNITEGEARGSVILTVK	X;X;X;X;X;X;X;X;X;X;X;X;X;X;X;Deamidation 18O (N);X;X;X;X;X;X;X;X;X;X;X;X;X;X;X
289	A0A087X1T7	Aggrecan core protein	ACAN	A0A087X1T7;P16112	1	52.3294	9.67807e-14	198.07	182.85	52.329	1	135.843	0.00550967	164.53	1	95.9093	0.00353769	179.21	1	86.095	9.67807e-14	152.63	1	84.5678	0.000114235	194.44	1	179.21	0.00353769	179.21	1	97.7981	0.00528762	157.58	1	52.3294	0.00419509	172.15	1	104.747	0.0010952	137.9	1	151.562	2.78929e-06	198.07	N	AIPSDATLEVQSLRSNDSGVYRCEVMHGIED	X;X;X;X;X;X;X;X;X;X;X;X;X;X;X;Deamidation 18O (N);X;X;X;X;X;X;X;X;X;Oxidation (M);X;X;X;X;X
290	A0A087X1T7	Aggrecan core protein	ACAN	A0A087X1T7;P16112	1	130.154	1.41278e-126	276.41	258.74	130.15	1	112.506	1.02856e-36	212.59	1	126.885	1.87919e-67	241.51	1	124.908	1.87919e-67	241.51	1	114.336	1.41278e-126	276.41	1	103.88	8.81882e-37	213.06	1	52.344	5.38125e-80	245.69	1	61.6413	1.39397e-80	250.8	1	82.5431	1.69273e-55	232.37	1	130.154	2.23678e-67	241.15	N	CGGDKPGVRTVYLYPNQTGLPDPLSRHHAFC	X;X;X;X;X;X;X;X;X;X;X;X;X;X;X;Deamidation 18O (N);X;X;X;X;X;X;X;X;X;X;X;X;X;X;X
291	A0A087X1T7	Aggrecan core protein	ACAN	A0A087X1T7;P16112	1	82.9247	0	377.09	331.26	82.925	1	69.9345	2.41719e-109	266.6	1	80.5075	0	370.69	1	131.664	1.98812e-171	282.32	1	108.971	2.24666e-145	282.3	1	105.897	5.19482e-80	245.93	1	86.9442	3.53097e-81	252.13	1	241.071	0	375.65	1	79.0365	3.12745e-153	282.32	1	82.9247	0	377.09	N	CGGNLLGVRTVYVHANQTGYPDPSSRYDAIC	X;X;X;X;X;X;X;X;X;X;X;X;X;X;X;Deamidation 18O (N);X;X;X;X;X;X;X;X;X;X;X;X;X;X;X
292	I3L192	Basigin (Fragment)	BSG	I3L192	1	131.031	0.000148533	164.72	137.59	131.03	1	101.431	0.0144947	101.43					1	56.4338	0.00192775	127.46	1	145.13	0.00243085	145.13	1	117.036	0.00383665	117.04	1	78.3345	0.0130599	103.56	1	164.724	0.00387079	164.72	1	131.031	0.000148533	131.03	1	127.565	0.00192626	127.56	N	WAWYKITDSEDKALMNGSESRFFVSSSQGRS	X;X;X;X;X;X;X;X;X;X;X;X;X;X;Oxidation (M);Deamidation 18O (N);X;X;X;X;X;X;X;X;X;X;X;X;X;X;X
293	I3L192	Basigin (Fragment)	BSG	I3L192	1	199.494	9.50062e-127	274.24	205.8	199.49	1	155.03	5.2172e-21	161.19	1	188.706	1.49327e-25	188.71	1	166.759	5.06848e-21	166.76	1	237.461	1.09678e-67	237.46	1	83.2528	5.09403e-21	165.8	1	209.254	3.84562e-37	209.25	1	226.999	1.22278e-55	227	1	101.13	9.50062e-127	274.24	1	199.494	5.5162e-31	204.43	N	GAEDLGSKILLTCSLNDSATEVTGHRWLKGG	X;X;X;X;X;X;X;X;X;X;X;X;X;X;X;Deamidation 18O (N);X;X;X;X;X;X;X;X;X;X;X;X;X;X;X
294	B7Z230	Peptidylprolyl isomerase (EC 5.2.1.8)		B7Z230	1	265.949	0	294.93	242.66	294.93																													1	265.949	0	294.93					N	CSVLSKKGDYLKYHYNASLLDGTLLDSTWNL	X;X;X;X;X;X;X;X;X;X;X;X;X;X;X;Deamidation 18O (N);X;X;X;X;X;X;X;X;X;X;X;X;X;X;X
295	B7Z230	Peptidylprolyl isomerase (EC 5.2.1.8)		B7Z230	1	168.445	0	341.27	293.27	194.27	1	121.94	6.25693e-21	151.63	1	100.366	1.77537e-05	109.65	1	96.0953	2.10269e-08	105.79	1	249.615	7.85064e-157	281.5	1	142.392	1.95637e-25	157.98	1	169.992	2.22216e-39	201.22	1	284.254	0	341.27	1	225.794	2.27109e-90	243.95	1	168.445	1.68192e-34	194.27	N	CPRTIQVSDFVRYHYNGTFLDGTLFDSSHNR	X;X;X;X;X;X;X;X;X;X;X;X;X;X;X;Deamidation 18O (N);X;X;X;X;X;X;X;X;X;X;X;X;X;X;X
296	B7Z230	Peptidylprolyl isomerase (EC 5.2.1.8)		B7Z230	1	167.92	0	352.12	328.3	167.92													1	352.117	0	352.12	1	45.4364	0.027681	45.436									1	167.92	6.02423e-29	167.92					N	CERISQSGDFLRYHYNGTLLDGTLFDSSYSR	X;X;X;X;X;X;X;X;X;X;X;X;X;X;X;Deamidation 18O (N);X;X;X;X;X;X;X;X;X;X;X;X;X;X;X
297	Q96JW9	cDNA FLJ14925 fis, clone PLACE1008643, weakly similar to INTER-ALPHA-TRYPSIN INHIBITOR HEAVY CHAIN H2		Q96JW9	0.999893	39.72	8.10272e-15	150.21	127.74	141.32	0.999435	32.4794	0.000442554	104.98					0.99804	27.069	0.00156946	89.959	0.998814	29.255	0.0011306	101.6									0.99969	35.0783	8.10272e-15	150.21	0.99836	27.8456	4.33469e-14	143.86	0.999893	39.72	1.22744e-10	141.32	N	SSVVQATKTLFPNYFNGSEIIIAGKLVDRKL	X;X;X;X;X;X;X;X;X;X;X;X;X;X;X;Deamidation 18O (N);X;X;X;X;X;X;X;X;X;X;X;X;X;X;X
298	B7Z938	cDNA FLJ61727, highly similar to Laminin alpha-4 chain (Fragment)		B7Z938	1	349.468	0	349.47	328.17	349.47																													1	349.468	0	349.47					N	HEKQQERVREQMEVVNMSLSTSADSLTTPRL	X;X;X;X;X;X;X;X;X;X;X;X;X;X;X;Deamidation 18O (N);X;X;X;X;X;X;X;X;X;X;X;X;X;X;X
299	B7Z938	cDNA FLJ61727, highly similar to Laminin alpha-4 chain (Fragment)		B7Z938	0.999993	51.2769	6.47608e-31	221.8	156.45	221.8													0.999993	51.2769	6.47608e-31	221.8	0.999957	43.7064	2.12712e-09	180.18	0.999917	40.8199	1.05674e-16	202.44	0.998593	28.5119	3.18353e-06	125.46									N	SVSSGAAAHRHVNEINATIYLLKTKLSEREN	X;X;X;X;X;X;X;X;X;X;X;X;X;X;X;Deamidation 18O (N);X;X;X;X;X;X;X;X;X;X;X;X;X;X;X
300	B7Z938	cDNA FLJ61727, highly similar to Laminin alpha-4 chain (Fragment)		B7Z938	1	105.391	0.00436292	128.48	79.981	105.39													1	120.488	0.00644393	120.49									1	128.484	0.00436292	128.48	1	105.391	0.0163329	105.39					N	AQQRLGQSRLITEEANRTTMEVQQATAPMAN	X;X;X;X;X;X;X;X;X;X;X;X;X;X;X;Deamidation 18O (N);X;X;X;X;X;X;X;X;X;X;X;X;X;X;X
301	B7Z938	cDNA FLJ61727, highly similar to Laminin alpha-4 chain (Fragment)		B7Z938	1	162.684	2.87728e-09	162.68	126.1	162.68																													1	162.684	2.87728e-09	162.68					N	SAYNTAVNSARDAVRNLTEVVPQLLDQLRTV	X;X;X;X;X;X;X;X;X;X;X;X;X;X;X;Deamidation 18O (N);X;X;X;X;X;X;X;X;X;X;X;X;X;X;X
302	B7Z938	cDNA FLJ61727, highly similar to Laminin alpha-4 chain (Fragment)		B7Z938	1	116.41	4.62502e-06	160.86	110.57	116.41													1	83.3966	0.0106391	83.397	1	70.0893	0.0161316	70.089	1	122.547	0.00223453	122.55	1	112.023	0.00103157	112.02	1	160.857	4.62502e-06	160.86	1	116.41	0.00112292	116.41	N	LLDQLRTVEQKRPASNVSASIQRIRELIAQT	X;X;X;X;X;X;X;X;X;X;X;X;X;X;X;Deamidation 18O (N);X;X;X;X;X;X;X;X;X;X;X;X;X;X;X
305	P01857	Immunoglobulin heavy constant gamma 1 (Ig gamma-1 chain C region) (Ig gamma-1 chain C region EU) (Ig gamma-1 chain C region KOL) (Ig gamma-1 chain C region NIE)	IGHG1	P01857	1	305.117	6.04605e-261	312.99	286.03	305.12	1	190.263	5.9464e-05	190.26	1	304.048	4.46558e-232	304.05	1	276.026	6.08802e-157	276.03	1	312.988	6.04605e-261	312.99	1	78.3345	0.00380095	170.22	1	186.905	0.000387052	186.91	1	103.563	0.00250861	175.12	1	304.048	4.46558e-232	304.05	1	305.117	3.45564e-232	305.12	N	VEVHNAKTKPREEQYNSTYRVVSVLTVLHQD	X;X;X;X;X;X;X;X;X;X;X;X;X;X;X;Deamidation 18O (N);X;X;X;X;X;X;X;X;X;X;X;X;X;X;X
306	A0A0A0MS09	Immunoglobulin heavy constant delta (Fragment)	IGHD	A0A0A0MS09	1	128.484	0.000835826	128.48	53.636	128.48																													1	128.484	0.000835826	128.48	1	128.484	0.000835826	128.48	N	TYTCVVSHEDSRTLLNASRSLEVSYLAMTPL	X;X;X;X;X;X;X;X;X;X;X;X;X;X;X;Deamidation 18O (N);X;X;X;X;X;X;X;X;X;X;X;X;X;X;X
307	C9IYP2	Phosphatidate phosphatase LPIN1 (Fragment)	LPIN1	C9IYP2	1	56.4815	0.015546	56.482	28.27	56.482									1	56.4815	0.015546	56.482																									N	MGVLRSREKVVDIEINGESVDLHMKLGDNGE	X;X;X;X;X;X;X;X;X;X;X;X;X;X;X;Deamidation 18O (N);X;X;X;X;X;X;X;Oxidation (M);X;X;X;X;X;X;X
308	Q5JB40	Selectin-like protein		Q5JB40	0.5	0	6.89817e-05	130.98	91.834	130.98													0.5	0	6.89817e-05	130.98																					N	FCGEPPAIKDAVITGNNFTFRNTVTYTCKEG	X;X;X;X;X;X;X;X;X;X;X;X;X;X;X;Deamidation 18O (N);X;X;X;X;X;X;X;X;X;X;X;X;X;X;X
309	Q5JB40	Selectin-like protein		Q5JB40	0.862999	7.99285	6.89817e-05	130.98	91.834	91.855													0.5	0	6.89817e-05	130.98					0.862999	7.99285	0.00648387	91.855													N	CGEPPAIKDAVITGNNFTFRNTVTYTCKEGY	X;X;X;X;X;X;X;X;X;X;X;X;X;X;X;Deamidation 18O (N);X;X;X;X;X;X;X;X;X;X;X;X;X;X;X
310	Q5JB40	Selectin-like protein		Q5JB40	1	145.723	3.08022e-05	145.72	130.08	145.72													1	145.723	3.08022e-05	145.72																					N	PENALLSEKEFYVDQNVSIKCREGFLLQGHG	X;X;X;X;X;X;X;X;X;X;X;X;X;X;X;Deamidation 18O (N);X;X;X;X;X;X;X;X;X;X;X;X;X;X;X
311	Q5JB40	Selectin-like protein		Q5JB40	1	106.007	0.000158353	106.01	91.446	106.01													1	106.007	0.000158353	106.01																					N	SGYMLEGFLRSVCLENGTWTSPPICRAVCRF	X;X;X;X;X;X;X;X;X;X;X;X;X;X;X;Deamidation 18O (N);X;X;X;X;X;X;X;X;X;X;X;X;X;X;X
312	Q5JB40	Selectin-like protein		Q5JB40	1	305.982	1.10588e-189	305.98	275.25	305.98													1	305.982	1.10588e-189	305.98																					N	PKDIEAKTLEQQDSANVTWQIPTAKDNSGEK	X;X;X;X;X;X;X;X;X;X;X;X;X;X;X;Deamidation 18O (N);X;X;X;X;X;X;X;X;X;X;X;X;X;X;X
313	Q5JB40	Selectin-like protein		Q5JB40	1	60.4007	0.0177534	60.401	52.096	60.401																					1	60.4007	0.0177534	60.401													N	EGFLLEGARSRVCLANGSWSGATPDCVPVRC	X;X;X;X;X;X;X;X;X;X;X;X;X;X;X;Deamidation 18O (N);X;X;X;X;X;X;X;X;X;X;X;X;X;X;X
314	B4DVS2	cDNA FLJ57617		B4DVS2	0.5	0	0.0195477	53.278	17.53	53.278													0.5	0	0.030729	45.608					0.5	0	0.0195477	53.278	0.5	0	0.0195477	53.278									N	RIEEQNDKISELIERNQRYVEQSNLMMEKRN	X;X;X;X;X;X;X;X;X;X;X;X;X;X;X;Deamidation 18O (N);X;X;X;X;X;X;X;X;X;Oxidation (M);Oxidation (M);X;X;X;X
315	B4DVS2	cDNA FLJ57617		B4DVS2	0.5	0	0.0195477	53.278	17.53	53.278													0.5	0	0.030729	45.608					0.5	0	0.0195477	53.278	0.5	0	0.0195477	53.278									N	ISELIERNQRYVEQSNLMMEKRNNSLQTATE	X;X;X;X;X;X;X;X;X;X;X;X;X;X;X;X;X;X;X;X;X;X;X;X;X;X;X;X;X;X;X
316	A0A0A0MTT8	Growth/differentiation factor 15 (Fragment)	GDF15	A0A0A0MTT8	1	166.769	1.14302e-119	263.59	235.31	263.59	1	107.19	4.93374e-39	157.86	1	121.566	7.48616e-29	173.44	1	157.446	2.14813e-65	232.53	1	120.7	4.21963e-39	202.13									1	166.769	1.14302e-119	263.59	1	157.115	1.52954e-54	220.21					N	ELRKRYEDLLTRLRANQSWEDSNTDLVPAPA	X;X;X;X;X;X;X;X;X;X;X;X;X;X;X;Deamidation 18O (N);X;X;X;X;X;X;X;X;X;X;X;X;X;X;X
317	Q29834	HLA-DRB1*1605 protein (Fragment)	HLA-DRB1*1605	Q29834	1	96.2529	0.017907	96.253	86.266	96.253																					1	96.2529	0.017907	96.253													N	___________CHFFNGTERVRFLDRYFYNQ	X;X;X;X;X;X;X;X;X;X;X;X;X;X;X;Deamidation 18O (N);X;X;X;X;X;X;X;X;X;X;X;X;X;X;X
318	A0A0A6YY99	Protein TNFSF12-TNFSF13	TNFSF12-TNFSF13	A0A0A6YY99	1	124.834	0.00495051	124.83	57.841	124.83	1	91.6263	0.0224909	91.626	1	124.834	0.00495051	124.83	1	124.834	0.00495051	124.83																									N	AGVDGTVSGWEEARINSSSPLRYNRQIGEFI	X;X;X;X;X;X;X;X;X;X;X;X;X;X;X;Deamidation 18O (N);X;X;X;X;X;X;X;X;X;X;X;X;X;X;X
319	A0A0A6YY99	Protein TNFSF12-TNFSF13	TNFSF12-TNFSF13	A0A0A6YY99	1	129.146	8.22806e-20	147.07	120.44	129.15	1	121.655	2.01327e-08	140.96	1	140.928	2.05455e-08	140.93	1	137.192	6.92401e-08	137.19	1	73.5933	0.00451373	73.593	1	120.663	5.73532e-05	120.66	1	120.663	5.73532e-05	120.66	1	147.067	8.22806e-20	147.07	1	126.161	1.49179e-05	126.16	1	129.146	8.40553e-10	129.15	N	QKQKKQHSVLHLVPINATSKDDSDVTEVMWQ	X;X;X;X;X;X;X;X;X;X;X;X;X;X;X;Deamidation 18O (N);X;X;X;X;X;X;X;X;X;X;X;X;X;X;X
320	B4DIP7	cDNA FLJ57114, highly similar to Niemann-Pick C1 protein		B4DIP7	0.994898	22.9005	0.00435903	106.4	89.374	106.4													0.994898	22.9005	0.00435903	106.4																					N	WEKEFINFVKNYKNPNLTISFTAERSIEDEL	X;X;X;X;X;X;X;X;X;X;X;X;X;X;X;Deamidation 18O (N);X;X;X;X;X;X;X;X;X;X;X;X;X;X;X
321	Q6ZNN4	cDNA FLJ27428 fis, clone WMD05691, highly similar to Collagen alpha 2(XI) chain		Q6ZNN4	1	201.476	4.92442e-23	201.48	177.62	201.48																	1	105.17	0.00119632	105.17	1	102.621	0.00140282	102.62									1	201.476	4.92442e-23	201.48	N	DPNQGCARDAFRVFCNFTAGGETCVTPRDDV	X;X;X;X;X;X;X;X;X;X;X;X;X;X;X;Deamidation 18O (N);X;X;X;X;X;X;X;X;X;X;X;X;X;X;X
322	A8MSM7	Microtubule-associated protein 9	MAP9	A8MSM7	1	89.5479	0.00186404	89.548	27.245	89.548									1	89.5479	0.00186404	89.548																									N	DDEEKNPSKLLFLKTNKSNGNITKDEPVCAI	X;X;X;X;X;X;X;X;X;X;X;X;X;X;X;Deamidation 18O (N);X;X;Deamidation 18O (N);X;Deamidation 18O (N);X;X;X;X;X;X;X;X;X;X
323	A8MSM7	Microtubule-associated protein 9	MAP9	A8MSM7	1	89.5479	0.00186404	89.548	27.245	89.548									1	89.5479	0.00186404	89.548																									N	EKNPSKLLFLKTNKSNGNITKDEPVCAIKNE	X;X;X;X;X;X;X;X;X;X;X;X;Deamidation 18O (N);X;X;Deamidation 18O (N);X;Deamidation 18O (N);X;X;X;X;X;X;X;X;X;X;X;X;X
324	A8MSM7	Microtubule-associated protein 9	MAP9	A8MSM7	1	89.5479	0.00186404	89.548	27.245	89.548									1	89.5479	0.00186404	89.548																									N	NPSKLLFLKTNKSNGNITKDEPVCAIKNEEE	X;X;X;X;X;X;X;X;X;X;Deamidation 18O (N);X;X;Deamidation 18O (N);X;Deamidation 18O (N);X;X;X;X;X;X;X;X;X;X;X;X;X;X;X
325	K7ELZ9	Nicalin (Fragment)	NCLN	K7ELZ9	1	92.4704	0.0221814	92.47	34.911	92.47													1	92.4704	0.0221814	92.47																					N	RNTRIIAEALTRVIYNLTEKGTPPDMPVFTE	X;X;X;X;X;X;X;X;X;X;X;X;X;X;X;Deamidation 18O (N);X;X;X;X;X;X;X;X;X;X;X;X;X;X;X
326	A0A0C4DGX7	GDP-fucose protein O-fucosyltransferase 2	POFUT2	A0A0C4DGX7	1	245.501	6.13216e-53	245.5	202.38	245.5	1	119.528	0.0013672	119.53	1	130.94	0.000671832	130.94	1	148.321	0.000898982	148.32					1	196.272	8.55749e-07	196.27	1	125.48	0.000353138	125.48	1	245.501	6.13216e-53	245.5	1	245.501	6.13216e-53	245.5					N	RHLREVGDEFRSRHLNSTDDADRIPFQEDWM	X;X;X;X;X;X;X;X;X;X;X;X;X;X;X;Deamidation 18O (N);X;X;X;X;X;X;X;X;X;X;X;X;X;X;X
327	A6NLC6	V-type proton ATPase subunit S1 (Fragment)	ATP6AP1	A6NLC6	1	69.7632	2.26376e-05	108.18	96.72	69.763													1	65.7837	0.00621873	65.784	1	44.7288	0.0251564	44.729	1	67.9947	0.00450586	67.995	1	108.18	2.26376e-05	108.18	1	85.9738	0.000799824	85.974	1	69.7632	0.00346168	69.763	N	QKQPVSPVIHPPVSYNDTAPRILFWAQNFSV	X;X;X;X;X;X;X;X;X;X;X;X;X;X;X;Deamidation 18O (N);X;X;X;X;X;X;X;X;X;X;X;X;X;X;X
328	A0A0C4DH07	Latent-transforming growth factor beta-binding protein 4	LTBP4	A0A0C4DH07	1	253.882	2.06432e-213	253.88	239.2	253.88									1	94.1915	0.00238181	94.191	1	231.063	8.9162e-48	231.06													1	253.882	2.06432e-213	253.88					N	VSAPDGPCPTGFERVNGSCEDVDECATGGRC	X;X;X;X;X;X;X;X;X;X;X;X;X;X;X;Deamidation 18O (N);X;X;X;X;X;X;X;X;X;X;X;X;X;X;X
329	A0A172Q3A0	Fibroblast activation protein (Fragment)		A0A172Q3A0	1	110.633	0.000208435	117.4	111.94	110.63													1	70.9919	0.000208435	117.4													1	110.633	0.0270263	110.63					N	FMGLPTKDDNLEHYKNSTVMARAEYFRNVDY	X;X;X;X;X;X;X;X;X;X;X;X;X;X;X;Deamidation 18O (N);X;X;X;X;X;X;X;X;X;X;X;X;X;X;X
330	A0A172Q3A0	Fibroblast activation protein (Fragment)		A0A172Q3A0	1	103.546	0.00545319	107.15	74.313	103.55													1	103.7	0.0074109	103.7	1	82.7494	0.0178376	82.749	1	85.7306	0.0158311	85.731	1	107.154	0.00545319	107.15	1	107.154	0.00545319	107.15	1	103.546	0.00750244	103.55	N	SEENTMRALTLKDILNGTFSYKTFFPNWISG	X;X;X;X;X;X;X;X;X;X;X;X;X;X;X;Deamidation 18O (N);X;X;X;X;X;X;X;X;X;X;X;X;X;X;X
331	A0A172Q3A0	Fibroblast activation protein (Fragment)		A0A172Q3A0	1	132.683	5.29132e-182	284.73	256.03	265													1	117.053	8.50777e-159	240.85					0.999847	38.1573	0.00685099	88.441	1	131.626	1.59685e-127	284.73	1	132.683	8.88245e-93	265	1	116.973	5.29132e-182	247.96	N	GQSYTILSNRTMKSVNASNYGLSPDRQFVYL	X;X;X;X;X;X;X;X;X;X;X;X;X;X;X;Deamidation 18O (N);X;X;X;X;X;X;X;X;X;X;X;X;X;X;X
332	A0A172Q3A0	Fibroblast activation protein (Fragment)		A0A172Q3A0	1	240.845	3.21193e-109	271.65	209.87	240.85													1	271.651	3.21193e-109	271.65	1	78.6526	0.00253663	109.6	1	131.826	4.05236e-05	131.83					1	240.845	5.02945e-52	240.85					N	VTDERVCLQWLKRVQNVSVLSICDFREDWQT	X;X;X;X;X;X;X;X;X;X;X;X;X;X;X;Deamidation 18O (N);X;X;X;X;X;X;X;X;X;X;X;X;X;X;X
333	A6NL68	Solute carrier family 2, facilitated glucose transporter member 1 (Fragment)	SLC2A1	A6NL68	1	163.507	2.82393e-40	227.94	204.62	163.51	1	121.041	0.000227784	121.04	1	227.196	3.15959e-40	227.2	1	93.3481	2.88491e-40	227.81													1	163.507	2.82393e-40	227.94	1	167.442	7.56079e-09	167.44	1	163.507	6.42418e-23	212.15	N	___MEPSSKVIEEFYNQTWVHRYGESILPTT	X;X;X;X;X;X;X;X;X;X;X;X;X;X;X;Deamidation 18O (N);X;X;X;X;X;X;X;X;X;X;X;X;X;X;X
334	F5GXS0	Complement C4-B	C4B	F5GXS0	1	225.966	0	350.9	299.45	225.97	1	141.581	1.9296e-15	182.02	1	63.0912	0	350.9	1	213.734	8.15648e-30	213.73	1	350.427	0	350.43	1	75.4785	0.0051393	75.479	1	207.974	4.0475e-63	207.97	1	284.921	1.19067e-136	284.92	1	267.925	3.16472e-101	267.93	1	225.966	8.01523e-137	286.34	N	GTWKISARFSDGLESNSSTQFEVKKYVLPNF	X;X;X;X;X;X;X;X;X;X;X;X;X;X;X;Deamidation 18O (N);X;X;X;X;X;X;X;X;X;X;X;X;X;X;X
335	F5GXS0	Complement C4-B	C4B	F5GXS0	1	172.981	2.43031e-05	172.98	148.06	172.98	1	114.513	0.00131352	114.51	1	172.981	4.88129e-05	172.98	1	131.454	4.04416e-05	131.45	1	144.77	3.2625e-05	144.77	1	154.813	2.43031e-05	154.81	1	125.48	6.40854e-05	125.48	1	165.975	5.17213e-05	165.98	1	160.754	3.35633e-05	160.75	1	172.981	4.88129e-05	172.98	N	SAYWIASHTTEERGLNVTLSSTGRNGFKSHA	X;X;X;X;X;X;X;X;X;X;X;X;X;X;X;Deamidation 18O (N);X;X;X;X;X;X;X;X;X;X;X;X;X;X;X
336	A0A0G2JMB2	Immunoglobulin heavy constant alpha 2 (Fragment)	IGHA2	A0A0G2JMB2	1	113.261	1.01481e-05	113.26	104.87	113.26													1	113.261	1.01481e-05	113.26																					N	TQKTIDRLAGKPTHVNVSVVMAEVDGTCY__	X;X;X;X;X;X;X;X;X;X;X;X;X;X;X;Deamidation 18O (N);X;X;X;X;X;X;X;X;X;X;X;X;X;X;X
337	A0A286YEY5	Immunoglobulin heavy constant alpha 2 (Fragment)	IGHA2	A0A0G2JMB2;A0A286YEY5	1	172.233	3.40403e-05	193.38	142.31	172.23	1	133.134	0.00184573	133.13	1	189.38	6.66759e-05	189.38	1	125.817	0.00195153	125.82	1	193.379	3.40403e-05	193.38	1	132.841	0.00184996	132.84	1	161.268	0.00389163	161.27	1	156.347	0.00305164	156.35	1	175.913	0.00267735	175.91	1	172.233	0.00340309	172.23	N	TCTAAHPELKTPLTANITKSGNTFRPEVHLL	X;X;X;X;X;X;X;X;X;X;X;X;X;X;X;Deamidation 18O (N);X;X;X;X;X;X;X;X;X;X;X;X;X;X;X
338	B4E2U4	cDNA FLJ52115, highly similar to HLA class II histocompatibility antigen, DRalpha chain		B4E2U4	1	77.0577	0.0171426	91.626	26.374	77.058	1	75.8543	0.025479	75.854					1	91.6263	0.0171426	91.626													1	75.8543	0.025479	75.854					1	77.0577	0.0238267	77.058	N	FEAQGALANIAVDKANLEIMTKRSNYTPITN	X;X;X;X;X;X;X;X;X;X;X;X;X;X;X;Deamidation 18O (N);X;X;X;Oxidation (M);X;X;X;X;Deamidation 18O (N);X;X;X;X;X;X
339	B4E2U4	cDNA FLJ52115, highly similar to HLA class II histocompatibility antigen, DRalpha chain		B4E2U4	1	105.165	0.00464483	105.17	75.995	105.17													1	66.5955	0.0467056	66.595					1	73.8866	0.0362781	73.887	1	93.3246	0.00663378	93.325	1	105.165	0.00464483	105.17					N	NVLICVIDKFTPPVVNVTWLRNGKPVTTGVS	X;X;X;X;X;X;X;X;X;X;X;X;X;X;X;Deamidation 18O (N);X;X;X;X;X;X;X;X;X;X;X;X;X;X;X
340	B4E2U4	cDNA FLJ52115, highly similar to HLA class II histocompatibility antigen, DRalpha chain		B4E2U4	0.916037	10.3783	2.69099e-06	113.3	97.986	113.3													0.916037	10.3783	2.69099e-06	113.3																					N	IAVDKANLEIMTKRSNYTPITNVPPEVTVLT	X;X;X;X;X;X;Deamidation 18O (N);X;X;X;Oxidation (M);X;X;X;X;Deamidation 18O (N);X;X;X;X;X;X;X;X;X;X;X;X;X;X;X
341	Q8NF80	FLJ00275 protein (Fragment)	FLJ00275	Q8NF80	1	116.721	1.54145e-13	116.72	98.162	116.72													1	116.721	1.54145e-13	116.72																					N	VQGSGQQPQAGLSQANFTLGPVSRSHGGQYR	X;X;X;X;X;X;X;X;X;X;X;X;X;X;X;Deamidation 18O (N);X;X;X;X;X;X;X;X;X;X;X;X;X;X;X
342	A0A0H3WBE8	Thrombospondin receptor (Fragment)	CD36	A0A0H3WBE8	1	172.843	6.2931e-55	223.06	196.79	223.06																									1	138.126	5.71782e-34	192.65	1	164.966	6.2931e-55	223.06	1	172.843	6.2931e-55	223.06	N	LKNLKRNYIVPILWLNETGTIGDEKANMFRS	X;X;X;X;X;X;X;X;X;X;X;X;X;X;X;Deamidation 18O (N);X;X;X;X;X;X;X;X;X;X;X;X;X;X;X
343	B4DQA0	L-selectin		B4DQA0	1	223.413	2.87821e-28	225.01	197.88	225.01																													1	223.413	2.87821e-28	225.01					N	___MNWQRARRFCRDNYTDLVAIQNKAEIEY	X;X;X;X;X;X;X;X;X;X;X;X;X;X;X;Deamidation 18O (N);X;X;X;X;X;X;X;X;X;X;X;X;X;X;X
344	A0A0J9YVX1	Sortilin (Fragment)	SORT1	A0A0J9YVX1	0.856249	7.7499	0.0117075	86.898	57.94	86.898																					0.856249	7.7499	0.0117075	86.898													N	SEDYGKNFKDITDLINNTFIRTEFGMAIGPE	X;X;X;X;X;X;X;X;X;X;X;X;X;X;X;Deamidation 18O (N);X;X;X;X;X;X;X;X;X;X;X;X;X;X;X
345	D6RD48	Claudin domain-containing protein 1 (Fragment)	CLDND1	D6RD48	1	110.73	1.10293e-287	280.38	223.66	280.38													0.999958	43.8108	7.15622e-06	153.95	0.983273	17.6926	0.00767612	91.855	0.999856	38.4139	0.00330427	111.06					1	110.73	1.10293e-287	280.38	1	78.9598	4.24106e-26	216.91	N	IGTDFWYEYRSPVQENSSDLNKSIWDEFISD	X;X;X;X;X;X;X;X;X;X;X;X;X;X;X;Deamidation 18O (N);X;X;X;X;X;X;X;X;X;X;X;X;X;X;X
346	D6RD48	Claudin domain-containing protein 1 (Fragment)	CLDND1	D6RD48	1	117.036	7.62324e-13	155.75	123.28	117.04					1	114.281	0.00492216	114.28					1	155.754	0.00294068	155.75									1	145.633	7.62324e-13	145.63					1	117.036	0.00383665	117.04	N	DEADEKTYNDALFRYNGTVGLWRRCITIPKN	X;X;X;X;X;X;X;X;X;X;X;X;X;X;X;Deamidation 18O (N);X;X;X;X;X;X;X;X;X;X;X;X;X;X;X
347	A0A0S2Z3H6	Cleft lip and palate associated transmembrane protein 1 isoform 1 (Fragment)	CLPTM1	A0A0S2Z3H6	1	128.463	7.08086e-14	153.95	133.17	128.46													1	153.946	7.08086e-14	153.95													1	137.158	1.58464e-07	137.16	1	128.463	2.43822e-09	128.46	N	YFNDYWNLQKDYYPINESLASLPLRVSFCPL	X;X;X;X;X;X;X;X;X;X;X;X;X;X;X;Deamidation 18O (N);X;X;X;X;X;X;X;X;X;X;X;X;X;X;X
348	A0A0S2Z3X0	Hexosaminidase A isoform 2	HEXA	A0A0S2Z3X0	1	149.816	0.000280211	166.16	96.337	149.82	1	144.089	0.00116972	144.09	1	120.155	0.000750831	120.15	1	98.0331	0.0107842	98.033	1	166.161	0.00168393	166.16	1	124.23	0.000280211	124.23	1	122.516	0.000470526	122.52	1	143.909	0.00118121	143.91	1	139.74	0.00113262	139.74	1	149.816	0.000803345	149.82	N	FSQLVWKSAEGTFFINKTEIEDFPPAGVLLH	X;X;X;X;X;X;X;X;X;X;X;X;X;X;X;Deamidation 18O (N);X;X;X;X;X;X;X;X;X;X;X;X;X;X;X
349	B5A959	Soluble FGFR1 variant 2	FGFR1	B5A959	1	92.8379	0.00325805	168.27	119.7	92.838													1	144.089	0.00325805	144.09	1	168.266	0.0047495	168.27	1	92.8379	0.0220467	92.838													N	SDPQPHIQWLKHIEVNGSKIGPDNLPYVQIL	X;X;X;X;X;X;X;X;X;X;X;X;X;X;X;Deamidation 18O (N);X;X;X;X;X;X;X;X;X;X;X;X;X;X;X
350	B4DWE0	cDNA FLJ50260, highly similar to Cytochrome b-245 heavy chain		B4DWE0	1	159.193	1.94021e-33	159.19	135.39	159.19													1	136.203	1.01438e-18	136.2													1	159.193	1.94021e-33	159.19					N	ERIVRGQTAESLAVHNITVCEQKISEWGKIK	X;X;X;X;X;X;X;X;X;X;X;X;X;X;X;Deamidation 18O (N);X;X;X;X;X;X;X;X;X;X;X;X;X;X;X
351	B4DWE0	cDNA FLJ50260, highly similar to Cytochrome b-245 heavy chain		B4DWE0	1	170.566	3.99915e-07	196.95	147.53	196.95													1	170.566	3.99915e-07	196.95					1	141.749	0.00123663	161.02													N	SDPYSVALSELGDRQNESYLNFARKRIKNPE	X;X;X;X;X;X;X;X;X;X;X;X;X;X;X;Deamidation 18O (N);X;X;X;X;X;X;X;X;X;X;X;X;X;X;X
352	B4DWE0	cDNA FLJ50260, highly similar to Cytochrome b-245 heavy chain		B4DWE0	0.941451	12.0627	0.000123424	101.2	80.992	101.2													0.941451	12.0627	0.000123424	101.2																					N	IAHLFNVEWCVNARVNNSDPYSVALSELGDR	X;X;X;X;X;X;X;X;X;X;X;X;X;X;X;Deamidation 18O (N);X;X;X;X;X;X;X;X;X;X;X;X;X;X;X
353	B4DVE1	cDNA FLJ53478, highly similar to Galectin-3-binding protein		B4DVE1	1	70.9415	0.00559636	93.258	74.946	70.942													1	93.2576	0.00559636	93.258					1	82.1708	0.00987655	82.171					1	78.3416	0.023321	78.342	1	70.9415	0.0340309	70.942	N	DFEGWKAAIPSALDTNSSKSTSSFPCPAGHF	X;X;X;X;X;X;X;X;X;X;X;X;X;X;X;Deamidation 18O (N);X;X;X;X;X;X;X;X;X;X;X;X;X;X;X
354	B4DVE1	cDNA FLJ53478, highly similar to Galectin-3-binding protein		B4DVE1	1	140.483	7.97112e-78	253.71	199.29	140.48													1	253.71	7.97112e-78	253.71	1	142.427	3.15848e-08	142.43	1	157.244	9.46462e-09	157.24	1	162.362	1.26256e-08	162.36	1	158.049	9.86685e-09	158.05	1	140.483	5.06738e-07	140.48	N	DLTDASVVCRALGFENATQALGRAAFGQGSG	X;X;X;X;X;X;X;X;X;X;X;X;X;X;X;Deamidation 18O (N);X;X;X;X;X;X;X;X;X;X;X;X;X;X;X
355	B4DVE1	cDNA FLJ53478, highly similar to Galectin-3-binding protein		B4DVE1	1	105.975	0.000104072	123.86	98.969	105.98													1	120.683	0.000481564	120.68	1	68.8931	0.0419721	68.893	1	94.6921	0.00549088	94.692					1	123.863	0.000104072	123.86	1	105.975	0.00414146	105.98	N	KSNCRHERDAGVVCTNETRSTHTLDLSRELS	X;X;X;X;X;X;X;X;X;X;X;X;X;X;X;Deamidation 18O (N);X;X;X;X;X;X;X;X;X;X;X;X;X;X;X
356	B4DVE1	cDNA FLJ53478, highly similar to Galectin-3-binding protein		B4DVE1	1	182.572	2.72197e-73	182.57	166.43	182.57													1	182.572	2.72197e-73	182.57																					N	TANLEAQALWKEPGSNVTMSVDAECVPMVRD	X;X;X;X;X;X;X;X;X;X;X;X;X;X;X;Deamidation 18O (N);X;X;X;X;X;X;X;X;X;X;X;X;X;X;X
357	B4DVE1	cDNA FLJ53478, highly similar to Galectin-3-binding protein		B4DVE1	1	178.842	9.23727e-43	178.84	133.68	178.84													1	146.162	4.10775e-06	146.16	1	89.8046	0.00368986	89.805	1	170.995	4.73033e-06	170.99					1	178.842	9.23727e-43	178.84					N	FHTVPFQLLARYKGLNLTEDTYKPRIYTSPT	X;X;X;X;X;X;X;X;X;X;X;X;X;X;X;Deamidation 18O (N);X;X;X;X;X;X;X;X;X;X;X;X;X;X;X
358	A0A2R8Y5L4	Epsilon-sarcoglycan (Fragment)	SGCE	A0A2R8Y5L4	1	67.1885	1.20199e-05	137.17	89.344	137.17	0.999969	45.1514	0.0448963	68.069									1	67.1885	1.20199e-05	137.17	0.999998	58.0523	0.00877409	90.306	0.999986	48.6402	0.0228483	81.865													N	GAVKNVWQPERLNAINITSALDRGGRVPLPI	X;X;X;X;X;X;X;X;X;X;X;X;X;X;X;Deamidation 18O (N);X;X;X;X;X;X;X;X;X;X;X;X;X;X;X
359	Q53GU8	Transforming growth factor, beta-induced, 68kDa variant (Fragment)		Q53GU8	1	152.939	2.8901e-14	152.94	118.25	152.94													1	152.939	2.8901e-14	152.94																					N	TVNCARLLKADHHATNGVVHLIDKVISTITN	X;X;X;X;X;X;X;X;X;X;X;X;X;X;X;Deamidation 18O (N);X;X;X;X;X;X;X;X;X;X;X;X;X;X;X
360	E5RFZ8	Zinc transporter ZIP14 (Fragment)	SLC39A14	E5RFZ8	1	252.824	5.35043e-202	252.82	205.83	252.82	1	117.673	0.00094667	117.67	1	104.434	0.00193775	104.43	1	93.2576	0.00237842	93.258	1	134.749	1.47868e-05	134.75	1	109.419	0.00131945	109.42	1	119.155	0.00029144	119.16	1	248.955	1.44244e-58	248.96	1	80.7633	0.00230015	107.83	1	252.824	5.35043e-202	252.82	N	LKALLNHLDVGVGRGNVTQHVQGHRNLS___	X;X;X;X;X;X;X;X;X;X;X;X;X;X;X;Deamidation 18O (N);X;X;X;X;X;X;X;X;X;X;X;X;X;X;X
361	D6REA1	Nucleotide exchange factor SIL1	SIL1	D6REA1	1	129.702	2.37709e-15	176.48	157.51	129.7	1	104.221	0.00443955	104.22	1	160.769	3.3587e-05	160.77	1	176.484	2.85217e-05	176.48	1	99.9731	0.00509038	99.973					1	69.9792	0.0388675	69.979	1	132.913	1.38743e-06	132.91	1	151.216	2.37709e-15	151.22	1	129.702	2.38149e-05	129.7	N	IETDMQIMVRLINKFNSSSSSLEEKIAALFD	X;X;X;X;X;X;X;X;X;X;X;X;X;X;X;Deamidation 18O (N);X;X;X;X;X;X;X;X;X;X;X;X;X;X;X
362	A0A0U1RQT9	Synaptophysin-like protein 1 (Fragment)	SYPL1	A0A0U1RQT9	0.999988	49.3394	3.88547e-21	178.22	148.92	178.22	0.999988	49.3394	3.88547e-21	178.22	0.99982	37.4357	0.000268622	105.95	0.999717	35.4862	0.00202315	83.53																									N	GQTEIQVNCPPAVTENKTVTATFGYPFRLNE	X;X;X;X;X;X;X;X;X;X;X;X;X;X;X;Deamidation 18O (N);X;X;X;X;X;X;X;X;X;X;X;X;X;X;X
363	A0A0U1RQT9	Synaptophysin-like protein 1 (Fragment)	SYPL1	A0A0U1RQT9	0.999962	44.2479	2.51799e-104	255.91	224.25	216.34									0.995567	23.5138	6.26433e-46	207.72	0.999802	37.0314	2.81531e-90	244.56									0.999962	44.2479	1.60962e-54	216.34	0.995742	23.6899	3.88552e-09	123.8	0.99633	24.3373	2.51799e-104	255.91	N	PFRLNEASFQPPPGVNICDVNWKDYVLIGDY	X;X;X;X;X;X;X;X;X;X;X;X;X;X;X;Deamidation 18O (N);X;X;X;X;X;X;X;X;X;X;X;X;X;X;X
364	A0A2R8Y5Q7	Natural resistance-associated macrophage protein 2 (Fragment)	SLC11A2	A0A2R8Y5Q7	0.99993	41.5349	0.0123067	55.127	40.817	55.127													0.99993	41.5349	0.0123067	55.127																					N	AFFGKTNEQVVEVCTNTSSPHAGLFPKDNST	X;X;X;X;X;X;X;X;X;X;X;X;X;X;X;Deamidation 18O (N);X;X;X;X;X;X;X;X;X;X;X;X;X;X;X
365	A0A140T9H1	HLA class II histocompatibility antigen, DP alpha 1 chain (Fragment)	HLA-DPA1	A0A140T9H1	0.999999	60.1324	3.81003e-07	120.9	114.78	120.9													0.999999	60.1324	3.81003e-07	120.9					0.99962	34.1955	0.000979752	80.859													N	IAILNNNLNTLIQRSNHTQATNDPPEVTVFP	X;X;X;X;X;X;X;X;X;X;X;X;X;X;X;Deamidation 18O (N);X;X;X;X;X;X;X;X;X;X;X;X;X;X;X
366	A0A2K9UYS7	MHC class II antigen	HLA-DPA1	A0A2K9UYS7	0.992593	21.2715	0.00575473	67.43	61.535	67.43													0.992593	21.2715	0.00575473	67.43					0.991335	20.5847	0.0275547	44.595													N	IAILNNNLNTLIQRSNHTQAANDPPEVTVFP	X;X;X;X;X;X;X;X;X;X;X;X;X;X;X;Deamidation 18O (N);X;X;X;X;X;X;X;X;X;X;X;X;X;X;X
367	A0A140T9K6	Atypical chemokine receptor 3 (Fragment)	ACKR3	A0A140T9K6	0.99472	22.7509	1.44178e-51	236.06	224.46	236.06													0.914834	10.3108	0.00111587	114.83									0.893321	9.22931	7.40472e-09	153.12	0.99472	22.7509	1.44178e-51	236.06					N	LPDTYYLKTVTSASNNETYCRSFYPEHSIKE	X;X;X;X;X;X;X;X;X;X;X;X;X;X;X;Deamidation 18O (N);X;X;X;X;X;X;X;X;X;X;X;X;X;X;X
368	Q16610	Extracellular matrix protein 1 (Secretory component p85)	ECM1	Q16610	1	69.5777	3.42668e-06	171.67	146.23	69.578					1	96.7446	0.00247105	96.745	1	83.3141	0.00470809	83.314	1	71.8061	0.00419619	84.718	1	69.4507	0.0168785	69.451	1	148.759	3.42668e-06	148.76	1	84.17	7.73507e-06	171.67	1	69.5777	0.00344674	86.772	1	131.172	2.83163e-05	131.17	N	QRVLTKHKHIPGLIHNMTARCCDLPFPEQAC	X;X;X;X;X;X;X;X;X;X;X;X;X;X;X;Deamidation 18O (N);Oxidation (M);X;X;X;X;X;X;X;X;X;X;X;X;X;X
369	Q16610	Extracellular matrix protein 1 (Secretory component p85)	ECM1	Q16610	0.977491	16.3775	0.000948089	156.18	128.92	104.43													0.5	0	0.0355229	48.284									0.971324	15.2985	0.000948089	156.18	0.977491	16.3775	0.0030665	104.43					N	IQLEREFQRCCRQGNNHTCTWKAWEDTLDKY	X;X;X;X;X;X;X;X;X;X;X;X;X;X;X;Deamidation 18O (N);X;X;X;X;X;X;X;X;X;X;X;X;X;X;X
370	A0A140VJJ6	Testicular tissue protein Li 70		A0A140VJJ6	1	145.915	0	421.93	380.71	145.91	1	251.376	3.92802e-81	251.38	1	330.104	3.47172e-267	330.1	1	197.72	4.86034e-30	197.72	1	227.799	0	421.93	1	133.258	1.86424e-202	312.92	1	85.0865	0	321.05	1	186.206	0	365.6	1	296.966	0	369.8	1	145.915	0	361.49	N	DKDLQSLEDILHQVENKTSEVKQLIKAIQLT	X;X;X;X;X;X;X;X;X;X;X;X;X;X;X;Deamidation 18O (N);X;X;X;X;X;X;X;X;X;X;X;X;X;X;X
371	A0A140VJJ6	Testicular tissue protein Li 70		A0A140VJJ6	0.996658	26.7653	1.04119e-12	199.11	184.48	147.75													0.987423	20.8908	1.04119e-12	199.11					0.996658	26.7653	8.39285e-06	147.75													N	ILTHDSSIRYLQEIYNSNNQKIVNLKEKVAQ	X;X;X;X;X;X;X;X;X;X;X;X;X;X;X;Deamidation 18O (N);X;X;X;X;X;X;X;X;X;X;X;X;X;X;X
372	B4E0H8	cDNA FLJ60385, highly similar to Integrin alpha-3		B4E0H8	1	123.883	0.000101716	123.88	94.938	123.88													1	96.8898	0.00556273	96.89													1	123.883	0.000101716	123.88					N	DAPVVTNVTVKARVWNSTFIEDYRDFDRVRV	X;X;X;X;X;X;X;X;X;X;X;X;X;X;X;Deamidation 18O (N);X;X;X;X;X;X;X;X;X;X;X;X;X;X;X
373	A0A140VJU8	Superoxide dismutase [Cu-Zn] (EC 1.15.1.1)		A0A140VJU8	1	255.079	2.2167e-127	267.93	251.79	255.08	1	51.2109	4.67264e-120	267.93	1	143.459	4.34103e-104	255.85	1	266.893	6.28647e-120	266.89	1	246.859	3.42498e-90	246.86	1	65.805	0.0141055	65.805	1	240.112	2.2167e-127	240.11	1	141.185	5.53623e-15	141.18	1	153.365	3.42498e-90	246.86	1	255.079	4.90976e-104	255.08	N	KLDAFFALEGFPTEPNSSSRAIHVHQFGDLS	X;X;X;X;X;X;X;X;X;X;X;X;X;X;X;Deamidation 18O (N);X;X;X;X;X;X;X;X;X;X;X;X;X;X;X
374	A0A140VJW3	Sushi domain containing 2, isoform CRA_a (Testicular tissue protein Li 190)	SUSD2 hCG_2043017	A0A140VJW3	1	69.9792	0.00534631	94.616	67.501	69.979													1	94.6162	0.00534631	94.616	1	72.0057	0.0256186	72.006	1	69.9792	0.0299352	69.979													N	TDLRVQARAQPGTMSNGTETRGTGLTAVAVQ	X;X;X;X;X;X;X;X;X;X;X;X;X;Oxidation (M);X;Deamidation 18O (N);X;X;X;X;X;X;X;X;X;X;X;X;X;X;X
375	A0JLQ0	AZGP1 protein (Fragment)	AZGP1	A0JLQ0	0.578221	1.37008	0.00341405	80.859	71.675	80.859																													0.578221	1.37008	0.00341405	80.859					N	EDIFMETLKDIVEYYNDSNGSHVLQGRFGCE	X;X;X;X;X;X;X;X;X;X;X;X;X;X;X;Deamidation 18O (N);X;X;X;X;X;X;X;X;X;X;X;X;X;X;X
376	A0JLQ0	AZGP1 protein (Fragment)	AZGP1	A0JLQ0	0.998245	27.5497	5.18475e-21	162.4	128.46	162.4																																	0.998245	27.5497	5.18475e-21	162.4	N	FMETLKDIVEYYNDSNGSHVLQGRFGCEIEN	X;X;X;X;X;X;X;X;X;X;X;X;X;X;X;Deamidation 18O (N);X;X;X;X;X;X;X;X;X;X;X;X;X;X;Deamidation 18O (N)
377	A0JLQ0	AZGP1 protein (Fragment)	AZGP1	A0JLQ0	0.669114	3.05821	0.00294249	120.46	96.302	120.46													0.593377	1.64138	0.0345474	81.548													0.669114	3.05821	0.00294249	120.46					N	NGSHVLQGRFGCEIENNRSSGAFWKYYYDGK	Deamidation 18O (N);X;X;X;X;X;X;X;X;X;X;X;X;X;X;Deamidation 18O (N);X;X;X;X;X;X;X;X;X;X;X;X;X;X;X
378	A0A1B0GTU3	Kinesin-like protein KIF16B	KIF16B	A0A1B0GTU3	0.906801	9.88102	0.0174166	69.451	22.571	69.451																									0.906801	9.88102	0.0174166	69.451									N	SSFSLSMTDLSKSRENLSAVMLYNPGLEFER	X;X;X;X;X;X;X;X;X;X;X;X;X;X;X;Deamidation 18O (N);X;X;X;X;Oxidation (M);X;X;X;X;X;X;X;X;X;X
380	A0A146E5L3	Mesenchymal stromal cell-and fibroblast-expressing Linx paralogue	Meflin	A0A146E5L3	0.999949	42.9647	1.4621e-24	145.69	123.92	145.69													0.999949	42.9647	1.4621e-24	145.69																					N	CAYRDLESVPPGFPANVTTLSLSANRLPGLP	X;X;X;X;X;X;X;X;X;X;X;X;X;X;X;Deamidation 18O (N);X;X;X;X;X;X;X;X;X;X;X;X;X;X;X
381	A0A146E5L3	Mesenchymal stromal cell-and fibroblast-expressing Linx paralogue	Meflin	A0A146E5L3	1	80.2873	2.85388e-12	147.73	118.19	80.287													1	147.732	2.85388e-12	147.73									1	122.639	2.29175e-05	122.64	1	80.2873	0.00151052	80.287					N	GTPVASSQPRFQAFANGSLLIPDFGKLEEGT	X;X;X;X;X;X;X;X;X;X;X;X;X;X;X;Deamidation 18O (N);X;X;X;X;X;X;X;X;X;X;X;X;X;X;X
382	B4E278	cDNA FLJ55571, highly similar to Sad1/unc-84 protein-like 1		B4E278	1	72.6522	0.00152501	164.33	89.226	72.652													1	164.335	0.00152501	164.33													1	72.6522	0.0138942	72.652					N	DLQTMLRDLQLQILRNVTHHVSVTKQLPTSE	X;X;X;X;X;X;X;X;X;X;X;X;X;X;X;Deamidation 18O (N);X;X;X;X;X;X;X;X;X;X;X;X;X;X;X
383	B4E278	cDNA FLJ55571, highly similar to Sad1/unc-84 protein-like 1		B4E278	1	100.878	0.00455676	100.88	69.506	100.88													1	100.878	0.00455676	100.88																					N	AFTLEHIPKTLSPTGNISSAPKDFAVYGLEN	X;X;X;X;X;X;X;X;X;X;X;X;X;X;X;Deamidation 18O (N);X;X;X;X;X;X;X;X;X;X;X;X;X;X;X
384	B4DPY4	cDNA FLJ54272, highly similar to Complement decay-accelerating factor		B4DPY4	1	347.758	1.11309e-297	347.76	330.39	347.76	1	125.74	0.000195416	125.74	1	170.022	1.9516e-08	170.02	1	151.074	7.10281e-09	151.07	1	244.265	2.18819e-64	244.27									1	280.382	3.12238e-127	280.38	1	282.613	2.33906e-127	282.61	1	347.758	1.11309e-297	347.76	N	ICLKGSQWSDIEEFCNRSCEVPTRLQKRTFS	X;X;X;X;X;X;X;X;X;X;X;X;X;X;X;Deamidation 18O (N);X;X;X;X;X;X;X;X;X;X;X;X;X;X;X
385	A0A182DWH8	Selenoprotein P (Fragment)	SELENOP	A0A182DWH8	1	116.704	6.56719e-29	166.57	146.2	166.57													0.999769	36.3588	0.0359908	48.315									1	114.97	7.32632e-29	164.68	1	116.704	6.56719e-29	166.57	1	85.4325	9.08224e-12	130.01	N	KLEDLRVKLKKEGYSNISYIVVNHQGISSRL	X;X;X;X;X;X;X;X;X;X;X;X;X;X;X;Deamidation 18O (N);X;X;X;X;X;X;X;X;X;X;X;X;X;X;X
386	A0A182DWH8	Selenoprotein P (Fragment)	SELENOP	A0A182DWH8	0.999951	43.0696	0.00820518	57.922	51.199	57.922													0.999951	43.0696	0.00820518	57.922																					N	KNKVSEHIPVYQQEENQTDVWTLLNGSKDDF	X;X;X;X;X;X;X;X;X;X;X;X;X;X;X;Deamidation 18O (N);X;X;X;X;X;X;X;X;X;X;X;X;X;X;X
387	Q9H9K4	cDNA FLJ12685 fis, clone NT2RM4002493		Q9H9K4	1	64.6401	0.0149399	81.017	40.52	64.64													1	81.0165	0.0193078	81.017									1	52.6925	0.0421791	52.693					1	64.6401	0.0149399	64.64	N	GVPMTSLERQRGYHKNSSQRHSISAMPKNLN	X;X;X;X;X;X;X;X;X;X;X;X;X;X;X;Deamidation 18O (N);X;X;X;X;X;X;X;X;X;Oxidation (M);X;X;X;X;X
388	A0A1B0GV06	Acid ceramidase (Fragment)	ASAH1	A0A1B0GV06	1	68.4198	0.00460448	68.42	60.523	68.42													1	68.4198	0.00460448	68.42																					N	TKTKILAPAYFILGGNQSGEGCVITRDRKES	X;X;X;X;X;X;X;X;X;X;X;X;X;X;X;Deamidation 18O (N);X;X;X;X;X;X;X;X;X;X;X;X;X;X;X
389	A0A1B0GV06	Acid ceramidase (Fragment)	ASAH1	A0A1B0GV06	1	147.368	1.78577e-32	166.14	134.21	147.37	1	152.621	7.15564e-09	152.62	1	134.749	1.90788e-06	134.75	1	141.879	1.65643e-07	141.88	1	128.283	0.000130713	128.28	1	81.865	0.017014	81.865	1	127.424	0.000152572	127.42	1	166.141	1.78577e-32	166.14	1	150.942	7.19413e-09	150.94	1	147.368	6.57208e-16	147.37	N	KDVMWIGFLTRTVLENSTSYEEAKNLLTKTK	X;X;X;X;X;X;X;X;X;X;X;X;X;X;X;Deamidation 18O (N);X;X;X;X;X;X;X;X;X;X;X;X;X;X;X
390	A0A1B0GTY3	A disintegrin and metalloproteinase with thrombospondin motifs 2	ADAMTS2	A0A1B0GTY3	1	70.4884	0.0143456	70.488	55.287	70.488													1	46.5921	0.0405944	46.592													1	70.4884	0.0143456	70.488					N	GMQVRSVRCIQPLHDNTTRSVHAKHCNDARP	X;X;X;X;X;X;X;X;X;X;X;X;X;X;X;Deamidation 18O (N);X;X;X;X;X;X;X;X;X;X;X;X;X;X;X
391	F8WD96	Cathepsin D	CTSD	F8WD96	1	98.044	0.000927114	144.77	63.474	98.044	1	117.312	0.00108827	117.31	1	98.0483	0.0107751	98.048	1	90.6956	0.0135905	90.696									1	144.77	0.00112611	144.77	1	118.669	0.000927114	118.67	1	98.044	0.0107777	98.044					N	GGTDSKYYKGSLSYLNVTRKAYWQVHLDQ__	X;X;X;X;X;X;X;X;X;X;X;X;X;X;X;Deamidation 18O (N);X;X;X;X;X;X;X;X;X;X;X;X;X;X;X
392	A0A1B0RPQ5	Anosmin-1 (EC 3.4.21.4)	ANOS1	A0A1B0RPQ5	1	194.501	3.82297e-41	230.41	198.57	194.5	1	215.502	1.48659e-24	215.5	1	230.412	3.82297e-41	230.41	1	203.828	1.59055e-17	203.83	1	203.828	1.59055e-17	203.83	1	129.156	4.78822e-05	129.16	1	199.089	4.20027e-17	199.09	1	185.769	1.51408e-10	185.77	1	217.826	3.19775e-31	217.83	1	194.501	4.41968e-13	194.5	N	ELQSGQLEVKWSSKFNISIEPVIYVVQRRWN	X;X;X;X;X;X;X;X;X;X;X;X;X;X;X;Deamidation 18O (N);X;X;X;X;X;X;X;X;X;X;X;X;X;X;X
393	A0A1B0RPQ5	Anosmin-1 (EC 3.4.21.4)	ANOS1	A0A1B0RPQ5	1	141.48	6.95486e-10	141.48	100.76	141.48	1	82.7494	0.0078432	82.749	1	69.5982	0.0184558	69.598	1	89.0474	0.0052827	89.047	1	50.2923	0.0327561	50.292	1	47.7058	0.0346269	47.706	1	42.3359	0.0385108	42.336	1	62.3026	0.022272	62.303	1	62.3026	0.022272	62.303	1	141.48	6.95486e-10	141.48	N	VNRYHVRWFPEACAHNRTTRSEASSGMTHEN	X;X;X;X;X;X;X;X;X;X;X;X;X;X;X;Deamidation 18O (N);X;X;X;X;X;X;X;X;X;X;X;X;X;X;X
394	A0A1B1SMR9	Collagen type IX alpha 1	COL9A1	A0A1B1SMR9	1	216.821	8.61691e-240	312.74	290.62	216.82					1	86.0796	2.26102e-07	86.08	1	275.2	6.27675e-151	275.2	1	312.743	8.61691e-240	312.74					1	121.496	5.13501e-26	149.62	1	193.38	1.40087e-70	193.38	1	216.821	1.37458e-66	216.82					N	SYKGLDGSLQTAAFSNLSSLFDSQWHKIMIG	X;X;X;X;X;X;X;X;X;X;X;X;X;X;X;Deamidation 18O (N);X;X;X;X;X;X;X;X;X;X;X;X;X;X;X
395	A0A1B1SMR9	Collagen type IX alpha 1	COL9A1	A0A1B1SMR9	0.999645	34.4971	0.0108525	112.17	65.104	112.17																					0.999645	34.4971	0.0108525	112.17													N	RVVGSATLQVAYKLGNNVDFRIPTRNLYPSG	X;X;X;X;X;X;X;X;X;X;X;X;X;X;X;Deamidation 18O (N);X;X;X;X;X;X;X;X;X;X;X;X;X;X;X
396	A0A1I9LHJ2	Sulfotransferase (EC 2.8.2.-)	CHST6	A0A1I9LHJ2	1	100.552	9.74074e-79	265.06	225.41	250.47	0.999804	37.0861	0.00728814	96.331	1	63.4704	0.00100206	137.14	0.999993	51.2575	0.000320589	124.92	0.999393	32.1669	0.00750244	103.55									1	89.976	6.84065e-53	244.68	1	100.552	1.83364e-53	250.47	1	97.8292	9.74074e-79	265.06	N	GARREAFKTSSRNALNVSQAWRHALPFAKIR	X;X;X;X;X;X;X;X;X;X;X;X;X;X;X;Deamidation 18O (N);X;X;X;X;X;X;X;X;X;X;X;X;X;X;X
397	A0A1I9LHJ2	Sulfotransferase (EC 2.8.2.-)	CHST6	A0A1I9LHJ2	1	89.1886	0.00930709	89.189	49.404	89.189									1	89.1886	0.00930709	89.189																									N	LCDMDVFDAYLPWRRNLSDLFQWAVSRALCS	X;X;X;X;X;X;X;X;X;X;X;X;X;X;X;Deamidation 18O (N);X;X;X;X;X;X;X;X;X;X;X;X;X;X;X
398	A0A1S5UZ16	Target of Nesh-SH3	ABI3BP	A0A1S5UZ16	1	96.7902	5.31368e-13	106.03	98.033	96.79					1	65.7837	0.00256447	65.784									1	106.025	5.31368e-13	106.03	1	96.7902	0.00141514	96.79													N	PLGGVILVHLIIPGLNETTVKLPASLMFEIS	X;X;X;X;X;X;X;X;X;X;X;X;X;X;X;Deamidation 18O (N);X;X;X;X;X;X;X;X;X;X;X;X;X;X;X
399	A0A1S5UZ16	Target of Nesh-SH3	ABI3BP	A0A1S5UZ16	1	75.692	0.0210595	95.531	77.764	75.692	1	93.1955	0.0219156	93.195	1	86.095	0.0254278	86.095	1	84.5678	0.0270026	84.568	1	82.2405	0.0294024	82.241	1	95.5305	0.0210595	95.531	1	82.2405	0.0294024	82.241	1	75.7382	0.0380212	75.738	1	86.8328	0.0371062	86.833	1	75.692	0.0381035	75.692	N	PLNDTVTEYEVISRENGSFSGKNKSIQMTNQ	X;X;X;X;X;X;X;X;X;X;X;X;X;X;X;Deamidation 18O (N);X;X;X;X;X;X;X;X;X;X;X;Oxidation (M);X;Deamidation 18O (N);X
400	A0A1S5UZ16	Target of Nesh-SH3	ABI3BP	A0A1S5UZ16	1	130.412	2.14573e-05	150.61	127.18	130.41	1	85.8209	0.00681593	85.821	1	84.6583	0.00804555	84.658					1	107.555	0.00361832	107.55	1	91.5493	0.00531192	91.549	1	90.1424	0.0052318	90.142	1	119.224	0.000654698	119.22	1	150.608	2.14573e-05	150.61	1	130.412	4.45643e-05	130.41	N	LMFEISDALKTQLAKNETLALPAESKTPEVE	X;X;X;X;X;X;X;X;X;X;X;X;X;X;X;Deamidation 18O (N);X;X;X;X;X;X;X;X;X;X;X;X;X;X;X
401	A0A1S5UZ16	Target of Nesh-SH3	ABI3BP	A0A1S5UZ16	1	174.589	3.37414e-39	174.59	163.48	174.59																													1	174.589	3.37414e-39	174.59					N	DIKQPTVPASGEELENITDFSSSPTRETDPL	X;X;X;X;X;X;X;X;X;X;X;X;X;X;X;Deamidation 18O (N);X;X;X;X;X;X;X;X;X;X;X;X;X;X;X
402	A0A1S5UZ16	Target of Nesh-SH3	ABI3BP	A0A1S5UZ16	1	64.3937	7.87538e-27	229.33	191.01	64.394	1	48.091	0.0318012	48.091	1	74.165	0.020486	74.165	1	64.3937	2.30603e-21	195.88	1	85.7159	5.2035e-05	191.17	1	107.693	0.010075	107.69	1	229.327	7.87538e-27	229.33	1	68.5575	0.00384427	169.12	1	175.514	3.98591e-08	175.51	1	132.758	1.48918e-20	224.7	N	PRKLIPITIIKQVIQNVTHKDSAKSPEKAPL	X;X;X;X;X;X;X;X;X;X;X;X;X;X;X;Deamidation 18O (N);X;X;X;X;X;X;X;X;X;X;X;X;X;X;X
403	A0A1S5UZ16	Target of Nesh-SH3	ABI3BP	A0A1S5UZ16	1	86.6425	1.23333e-49	167.78	134.23	167	1	65.0133	2.86975e-11	120.6	1	85.1184	1.23333e-49	167.78	0.99997	45.1868	7.20834e-08	111.2	1	86.6425	1.66074e-49	167	0.999935	41.7291	0.00011629	69.619	1	76.934	1.50364e-11	122.27	1	65.2942	4.15933e-08	112.8	1	68.6339	2.97564e-23	140.57	0.999998	56.5114	1.49703e-07	107.01	N	ENGSFSGKNKSIQMTNQTFSTVENLKPNTSY	X;Deamidation 18O (N);X;X;X;X;X;X;X;X;X;X;X;Oxidation (M);X;Deamidation 18O (N);X;X;X;X;X;X;X;X;X;X;X;Deamidation 18O (N);X;X;X
404	A0A1S5UZ16	Target of Nesh-SH3	ABI3BP	A0A1S5UZ16	0.9997	35.2227	1.23333e-49	167.78	134.23	140.57	0.99898	29.9096	2.86975e-11	120.6	0.99765	26.2784	1.23333e-49	167.78	0.975186	15.9438	7.20834e-08	111.2	0.99761	26.2059	1.66074e-49	167	0.971715	15.3596	0.00011629	69.619	0.995799	23.7472	1.50364e-11	122.27	0.991372	20.6031	4.15933e-08	112.8	0.9997	35.2227	2.97564e-23	140.57	0.98424	17.9554	1.49703e-07	107.01	N	QMTNQTFSTVENLKPNTSYEFQVKPKNPLGE	X;Oxidation (M);X;Deamidation 18O (N);X;X;X;X;X;X;X;X;X;X;X;Deamidation 18O (N);X;X;X;X;X;X;X;X;X;X;X;X;X;X;X
405	A0A1S5UZ16	Target of Nesh-SH3	ABI3BP	A0A1S5UZ16	1	206.363	3.34744e-44	215.85	150.54	206.36	1	84.1976	8.25826e-09	149.41	1	178.713	3.34744e-44	194.29	1	135.018	0.000196183	135.02	1	76.3572	5.13945e-23	212.9	1	72.7049	8.27868e-09	149.38	1	215.849	7.01894e-25	215.85	1	146.163	8.74002e-18	206.36	1	176.252	1.53157e-18	176.25	1	206.363	8.74002e-18	206.36	N	QKLPKGKRPNLKVHINTTSDSILLKFLRPSP	X;X;X;X;X;X;X;X;X;X;X;X;X;X;X;Deamidation 18O (N);X;X;X;X;X;X;X;X;X;X;X;X;X;X;X
406	B4DLJ6	cDNA FLJ56989, highly similar to Macrophage receptor MARCO		B4DLJ6	1	143.927	2.66261e-46	236.92	214.39	235.01					1	140.464	2.04241e-35	228.64	0.999999	59.4403	0.00651882	91.658	1	123.368	9.2583e-19	211.86	0.999991	50.5695	0.00230813	112.13	1	82.8863	8.8905e-06	176.48	1	143.927	3.44596e-46	235.01	1	133.58	2.7828e-26	219.72	1	140.255	2.66261e-46	236.92	N	TWVRVSHEHLLQRVDNFTQNPGMFRIKGEQG	X;X;X;X;X;X;X;X;X;X;X;X;X;X;X;Deamidation 18O (N);X;X;X;X;X;X;X;X;X;X;X;X;X;X;X
407	I2D5J2	Apolipoprotein M (Fragment)	APOM	I2D5J2	1	211.445	3.79201e-57	211.45	200.72	211.45																													1	211.445	3.79201e-57	211.45					N	KTELFSSSCPGGIMLNETGQGYQRFLLYNRS	X;X;X;X;X;X;X;X;X;X;X;X;X;X;X;Deamidation 18O (N);X;X;X;X;X;X;X;X;X;X;X;X;X;X;X
408	Q6Q4G8	Neurominidase (Fragment)	NEU1	Q6Q4G8	1	117.89	0.00101964	117.89	84.339	117.89																													1	117.89	0.00101964	117.89					N	HPEFRVNLTLRWSFSNGTSWRKETVQLWPGP	X;X;X;X;X;X;X;X;X;X;X;X;X;X;X;Deamidation 18O (N);X;X;X;X;X;X;X;X;X;X;X;X;X;X;X
409	A0A1W2PNW4	Vascular endothelial growth factor receptor 1	FLT1	A0A1W2PNW4	1	87.4761	0.0131499	88.948	71.562	87.476	1	76.0641	0.0250871	76.064	1	88.9479	0.0141715	88.948																	1	88.9479	0.0131499	88.948					1	87.4761	0.0143184	87.476	N	GKRIIWDSRKGFIISNATYKEIGLLTCEATV	X;X;X;X;X;X;X;X;X;X;X;X;X;X;X;Deamidation 18O (N);X;X;X;X;X;X;X;X;X;X;X;X;X;X;X
410	A0A1W2PNW4	Vascular endothelial growth factor receptor 1	FLT1	A0A1W2PNW4	1	130.993	1.39638e-15	151.1	139.79	151.1	1	81.035	0.000112941	106.35	1	95.0067	1.09683e-06	119.96	1	69.0001	0.000924834	96.208																	1	130.993	1.39638e-15	151.1	1	116.489	4.11683e-13	131.18	N	TPRPVKLLRGHTLVLNCTATTPLNTRVQMTW	X;X;X;X;X;X;X;X;X;X;X;X;X;X;X;Deamidation 18O (N);X;X;X;X;X;X;X;X;X;X;X;X;X;X;X
411	A0A1W2PNW4	Vascular endothelial growth factor receptor 1	FLT1	A0A1W2PNW4	1	68.4405	0.0127773	74.76	52.286	68.44																									1	74.7599	0.0127773	74.76	1	68.4405	0.0154219	68.44					N	LYTCRVRSGPSFKSVNTSVHIYDKAFITVKH	X;X;X;X;X;X;X;X;X;X;X;X;X;X;X;Deamidation 18O (N);X;X;X;X;X;X;X;X;X;X;X;X;X;X;X
412	A0A1W2PNW4	Vascular endothelial growth factor receptor 1	FLT1	A0A1W2PNW4	1	133.227	3.34257e-05	133.23	80.061	133.23	1	91.5493	0.00531192	91.549																					1	108.431	0.00549293	108.43	1	119.224	0.000654698	119.22	1	133.227	3.34257e-05	133.23	N	TEGRELVIPCRVTSPNITVTLKKFPLDTLIP	X;X;X;X;X;X;X;X;X;X;X;X;X;X;X;Deamidation 18O (N);X;X;X;X;X;X;X;X;X;X;X;X;X;X;X
413	P00533	Epidermal growth factor receptor (EC 2.7.10.1) (Proto-oncogene c-ErbB-1) (Receptor tyrosine-protein kinase erbB-1)	EGFR ERBB ERBB1 HER1	P00533	0.976603	16.2056	0.00531388	91.584	50.555	91.584													0.976603	16.2056	0.00531388	91.584																					N	CNGIGIGEFKDSLSINATNIKHFKNCTSISG	X;X;X;X;X;X;X;X;X;X;X;X;X;X;X;Deamidation 18O (N);X;X;X;X;X;X;X;X;X;X;X;X;X;X;X
414	P00533	Epidermal growth factor receptor (EC 2.7.10.1) (Proto-oncogene c-ErbB-1) (Receptor tyrosine-protein kinase erbB-1)	EGFR ERBB ERBB1 HER1	P00533	0.5	0	3.74468e-14	146.36	121.97	136.38													0.5	0	3.84397e-12	146.36													0.5	0	3.74468e-14	136.38					N	GPHCVKTCPAGVMGENNTLVWKYADAGHVCH	X;X;X;X;X;X;X;X;X;X;X;X;X;X;X;Deamidation 18O (N);X;X;X;X;X;X;X;X;X;X;X;X;X;X;X
415	P00533	Epidermal growth factor receptor (EC 2.7.10.1) (Proto-oncogene c-ErbB-1) (Receptor tyrosine-protein kinase erbB-1)	EGFR ERBB ERBB1 HER1	P00533	0.5	0	3.74468e-14	146.36	121.97	136.38													0.5	0	3.84397e-12	146.36													0.5	0	3.74468e-14	136.38					N	PHCVKTCPAGVMGENNTLVWKYADAGHVCHL	X;X;X;X;X;X;X;X;X;X;X;X;X;X;X;X;X;X;X;X;X;X;X;X;X;X;X;X;X;X;X
416	C1PHC3	CD44 molecule (Fragment)	CD44	C1PHC3	1	82.8505	1.49538e-17	204	185.28	82.85					1	95.0939	0.00375277	95.094	1	89.1886	0.00376053	89.189	1	104.593	3.09434e-09	173.04	1	86.0276	0.00364345	97.734	1	84.7175	0.00357763	98.407	1	96.7446	0.00374016	96.745	1	82.8505	1.49538e-17	204	1	176.615	1.60478e-09	176.62	N	YSISRTEAADLCKAFNSTLPTMAQMEK____	X;X;X;X;X;X;X;X;X;X;X;X;X;X;X;Deamidation 18O (N);X;X;X;X;X;Oxidation (M);X;X;Oxidation (M);X;X;X;X;X;X
417	C8KHU1	Equilibrative nucleoside transporter 1 (Fragment)	SLC29A1	C8KHU1	1	309.582	0	309.58	277.99	309.58													1	103.296	1.91482e-106	236.92	1	217.883	3.44435e-123	217.88	1	217.906	3.43294e-123	217.91	1	309.582	9.32763e-203	309.58	1	271.557	9.44238e-118	271.56	1	309.582	0	309.58	N	MTATQYFTNRLDMSQNVSLVTAELSKDAQA_	X;X;X;X;X;X;X;X;X;X;X;X;Oxidation (M);X;X;Deamidation 18O (N);X;X;X;X;X;X;X;X;X;X;X;X;X;X;X
418	Q86TT2	Full-length cDNA clone CS0DI019YF20 of Placenta of Homo sapiens (human) (Fragment)		Q86TT2	1	176.087	2.27943e-20	224.51	95.115	176.09	1	121.048	0.00278786	121.05	1	166.296	0.00386131	166.3	1	160.106	0.00375501	160.11	1	211.347	5.11702e-13	211.35	1	94.3023	0.0188568	94.302	1	114.281	0.00492216	114.28	1	178.649	0.00213765	178.65	1	224.513	2.27943e-20	224.51	1	176.087	0.00264301	176.09	N	VEVHNAKTKPREEQYNSTFRVVSVLTVLHQD	X;X;X;X;X;X;X;X;X;X;X;X;X;X;X;Deamidation 18O (N);X;X;X;X;X;X;X;X;X;X;X;X;X;X;X
419	Q8NF17	FLJ00385 protein (Fragment)	FLJ00385	A0A286YEY4;Q8NF17	1	82.7505	3.61951e-261	314.98	270.53	82.75	1	172.213	0.0034069	172.21	1	81.5478	0.00283314	175.12	1	111.947	0.00188702	130.28	1	314.979	3.61951e-261	314.98	1	140.501	2.66622e-08	155.1	1	103.563	0.00210187	178.83	1	122.187	9.66024e-08	149.91	1	88.3697	0.0019399	175.38	1	82.7505	2.02911e-05	195.06	N	VEVHNAKTKPREEQFNSTFRVVSVLTVLHQD;VEVHNAKTKPREEQFNSTFRVVSVLTVVHQD	X;X;X;X;X;X;X;X;X;X;X;X;X;X;X;Deamidation 18O (N);X;X;X;X;X;X;X;X;X;X;X;X;X;X;X
420	A0A286YEY5	Immunoglobulin heavy constant alpha 2 (Fragment)	IGHA2	A0A286YEY5	1	218.397	4.94444e-148	295.32	261.36	218.4					1	159.519	1.03838e-09	159.52					1	141.464	4.94444e-148	295.32	1	99.9412	0.00150714	99.941									1	214.234	2.78754e-24	214.23	1	218.397	2.94539e-31	218.4	N	CPDGKSVTCHVKHYTNSSQDVTVPCRVPPPP	X;X;X;X;X;X;X;X;X;X;X;X;X;X;X;Deamidation 18O (N);X;X;X;X;X;X;X;X;X;X;X;X;X;X;X
421	E9PIA8	Palmitoyl-protein thioesterase 1 (Fragment)	PPT1	E9PIA8	1	218.159	1.54473e-137	218.16	192.44	218.16																													1	218.159	1.54473e-137	218.16					N	KNLMALKKFVMVKFLNDSIVDPVDSEWFGFY	X;X;X;X;X;X;X;X;X;X;X;X;X;X;X;Deamidation 18O (N);X;X;X;X;X;X;X;X;X;X;X;X;X;X;X
422	E9PIA8	Palmitoyl-protein thioesterase 1 (Fragment)	PPT1	E9PIA8	1	108.238	0.0248414	108.24	43.462	108.24																																	1	108.238	0.0248414	108.24	N	NHSIFLADINQERGINESYKKNLMALKKFVM	X;X;X;X;X;X;X;X;X;X;X;X;X;X;X;Deamidation 18O (N);X;X;X;X;X;X;X;X;X;X;X;X;X;X;X
424	A0A2P9AT05	Uncharacterized protein	BQ8482_400015	A0A2P9AT05	0.999999	62.2283	0.0093217	63.292	38.106	63.292																													0.999999	62.2283	0.0093217	63.292					N	GERTNFTLDALRRTENEVFQGIWLNWLDALH	X;X;X;X;X;X;X;X;X;X;X;X;X;X;X;Deamidation 18O (N);X;X;X;X;X;X;X;X;X;X;X;X;X;X;X
425	A0A2P9AUM2	D-amino acid dehydrogenase 3 small subunit (EC 1.4.99.6)	dadA BQ8482_520005	A0A2P9AUM2	0.5	0	0.0115664	82.279	39.41	74.301																									0.5	0	0.0324246	71.692	0.5	0	0.0115664	82.279	0.5	0	0.025485	74.301	N	RLGLSKFRVAGTAEFNGLNRDIRDDRIKPLV	X;X;X;X;X;X;X;X;X;X;X;X;X;X;X;Deamidation 18O (N);X;X;X;X;X;X;X;X;X;X;X;X;X;X;X
426	A0A2P9AUM2	D-amino acid dehydrogenase 3 small subunit (EC 1.4.99.6)	dadA BQ8482_520005	A0A2P9AUM2	0.5	0	0.0115664	82.279	39.41	74.301																									0.5	0	0.0324246	71.692	0.5	0	0.0115664	82.279	0.5	0	0.025485	74.301	N	LSKFRVAGTAEFNGLNRDIRDDRIKPLVDWT	X;X;X;X;X;X;X;X;X;X;X;X;X;X;X;X;X;X;X;X;X;X;X;X;X;X;X;X;X;X;X
427	B4DPP0	cDNA FLJ51032, highly similar to CD9 antigen		B4DPP0	1	164.649	1.03194e-65	184.95	168.89	164.65									1	128.381	6.09911e-15	128.38	1	184.954	2.23577e-53	184.95	1	164.649	3.56767e-48	164.65	1	164.649	1.03194e-65	164.65													N	DEPQRETLKAIHYALNCCGLAGGVEQFISDI	X;X;X;X;X;X;X;X;X;X;X;X;X;X;X;Deamidation 18O (N);X;X;X;X;X;X;X;X;X;X;X;X;X;X;X
428	A0A2R8Y484	Leukocyte surface antigen CD47 (Fragment)	CD47	A0A2R8Y484	1	122.329	3.4043e-05	136.21	105.64	122.33	1	82.2868	0.0442355	82.287	1	105.935	0.00415455	105.94	1	105.358	0.00426541	105.36	1	115.714	0.00107114	115.71									1	135.711	3.4043e-05	136.21	1	135.711	3.4043e-05	136.21	1	122.329	0.000286168	122.33	N	WKFKGRDIYTFDGALNKSTVPTDFSSAKIEV	X;X;X;X;X;X;X;X;X;X;X;X;X;X;X;Deamidation 18O (N);X;X;X;X;X;X;X;X;X;X;X;X;X;X;X
429	A0A2R8Y484	Leukocyte surface antigen CD47 (Fragment)	CD47	A0A2R8Y484	1	106.4	0.00523226	106.4	87.129	106.4					1	106.4	0.00557465	106.4					1	93.1105	0.00821047	93.111													1	90.1504	0.00523226	90.15					N	___________MEAQNTTEVYVKWKFKGRDI	X;X;X;X;X;X;X;X;X;X;X;X;X;X;X;Deamidation 18O (N);X;X;X;X;X;X;X;X;X;X;X;X;X;X;X
430	A0A2R8Y484	Leukocyte surface antigen CD47 (Fragment)	CD47	A0A2R8Y484	1	51.6838	0	383.07	357.72	51.684	1	278.077	4.05784e-138	278.08	1	51.2109	7.04851e-121	269.9	1	260.112	5.31551e-105	260.11	1	190.858	2.27699e-104	254.71	1	67.4303	0.00494308	67.43	1	114.02	3.23926e-06	114.02	1	79.2926	1.08706e-137	274.68	1	383.066	0	383.07	1	51.6838	2.11394e-104	255.22	N	ASLKMDKSDAVSHTGNYTCEVTELTREGETI	X;X;X;X;X;X;X;X;X;X;X;X;X;X;X;Deamidation 18O (N);X;X;X;X;X;X;X;X;X;X;X;X;X;X;X
431	A0A2R8YCX5	Semaphorin-3E	SEMA3E	A0A2R8YCX5	0.999924	41.1663	0.0173163	116	53.283	116																									0.999924	41.1663	0.0173163	116	0.999924	41.1663	0.0173163	116					N	THPRLRLSHKELLNLNRTSIFHSPFGFLDLH	X;X;X;X;X;X;X;X;X;X;X;X;X;X;X;Deamidation 18O (N);X;X;X;X;X;X;X;X;X;X;X;X;X;X;X
432	A0A2R8YCX5	Semaphorin-3E	SEMA3E	A0A2R8YCX5	0.947693	12.5811	1.51698e-15	140.63	127.57	140.63	0.947693	12.5811	1.51698e-15	140.63	0.912215	10.1668	0.00159768	85.224																													N	ALDKTEEHLAYGIENNSTLLECTPRSLQAKV	X;X;X;X;X;X;X;X;X;X;X;X;X;X;X;Deamidation 18O (N);X;X;X;X;X;X;X;X;X;X;X;X;X;X;X
433	A0A2R8YGD1	Tripeptidyl-peptidase 1	TPP1	A0A2R8YGD1	1	57.4102	7.50122e-06	112.74	96.794	57.41													1	112.737	7.50122e-06	112.74	1	44.2378	0.029823	44.238	1	80.3162	1.59836e-05	80.316	1	57.4102	0.0103706	57.41									N	KFLSSSPHLPPSSYFNASGRAYPDVAALSDG	X;X;X;X;X;X;X;X;X;X;X;X;X;X;X;Deamidation 18O (N);X;X;X;X;X;X;X;X;X;X;X;X;X;X;X
434	A0A2R8YGD1	Tripeptidyl-peptidase 1	TPP1	A0A2R8YGD1	1	163.577	1.22131e-136	241.02	233.58	241.02													1	163.577	1.22131e-136	241.02																					N	GLHLGVTPSVIRKRYNLTSQDVGSGTSNNSQ	X;X;X;X;X;X;X;X;X;X;X;X;X;X;X;Deamidation 18O (N);X;X;X;X;X;X;X;X;X;X;X;Deamidation 18O (N);X;X;X
435	A0A2R8YGD1	Tripeptidyl-peptidase 1	TPP1	A0A2R8YGD1	0.5	0	1.22131e-136	241.02	233.58	241.02													0.5	0	1.22131e-136	241.02																					N	KRYNLTSQDVGSGTSNNSQACAQFLEQYFHD	X;X;X;Deamidation 18O (N);X;X;X;X;X;X;X;X;X;X;X;Deamidation 18O (N);X;X;X;X;X;X;X;X;X;X;X;X;X;X;X
436	A0A2R8YGD1	Tripeptidyl-peptidase 1	TPP1	A0A2R8YGD1	0.5	0	1.22131e-136	241.02	233.58	241.02													0.5	0	1.22131e-136	241.02																					N	RYNLTSQDVGSGTSNNSQACAQFLEQYFHDS	X;X;X;X;X;X;X;X;X;X;X;X;X;X;X;X;X;X;X;X;X;X;X;X;X;X;X;X;X;X;X
437	E9PNW4	UPAR/Ly6 domain-containing protein		E9PNW4	1	138.02	4.79805e-89	210.34	177.11	138.02	1	202.922	4.79805e-89	202.92	1	82.5155	9.50733e-19	195.1	1	130.068	2.40963e-14	157.67	1	72.4959	2.99331e-63	210.34					1	178.581	5.30373e-15	178.58	1	150.165	1.22439e-20	150.16	1	162.969	2.82055e-14	172.99	1	138.02	3.84963e-14	168.59	N	CYNCPNPTADCKTAVNCSSDFDACLITKAGL	X;X;X;X;X;X;X;X;X;X;X;X;X;X;X;Deamidation 18O (N);X;X;X;X;X;X;X;X;X;X;X;X;X;X;X
438	G3V4V7	Corticosteroid-binding globulin (Fragment)	SERPINA6	G3V4V7	1	214.26	6.24035e-24	214.26	184.01	214.26					1	191.044	9.44205e-13	191.04	1	150.056	1.74497e-09	150.06	1	188.06	1.92194e-11	188.06													1	206.36	1.96579e-18	206.36	1	214.26	6.24035e-24	214.26	N	TCGHTRAQLLQGLGFNLTERSETEIHQGFQH	X;X;X;X;X;X;X;X;X;X;X;X;X;X;X;Deamidation 18O (N);X;X;X;X;X;X;X;X;X;X;X;X;X;X;X
439	Q5UGI6	Serine/cysteine proteinase inhibitor clade G member 1 splice variant 2 (Fragment)	SERPING1	Q5UGI6	1	157.209	0.00322242	157.21	112.49	157.21	1	117.097	0.00772363	117.1	1	93.5608	0.0217817	93.561	1	141.827	0.0032287	141.83	1	120.621	0.00639388	120.62									1	149.401	0.00345081	149.4	1	143.107	0.00322242	143.11	1	157.209	0.00517762	157.21	N	QIFHSPDLAIRDTFVNASRTLYSSSPRVLSN	X;X;X;X;X;X;X;X;X;X;X;X;X;X;X;Deamidation 18O (N);X;X;X;X;X;X;X;X;X;X;X;X;X;X;Deamidation 18O (N)
440	Q5UGI6	Serine/cysteine proteinase inhibitor clade G member 1 splice variant 2 (Fragment)	SERPING1	Q5UGI6	0.999994	52.3132	0	391.76	353.52	337.89	0.989898	19.9117	1.35678e-200	303.36	0.997227	25.558	9.67593e-281	334.79	0.998061	27.1154	4.63711e-225	310.57	0.999962	44.2213	0	391.76					0.736867	4.47214	1.16653e-28	170.11									0.999994	52.3132	0	337.89	N	NASRTLYSSSPRVLSNNSDANLELINTWVAK	Deamidation 18O (N);X;X;X;X;X;X;X;X;X;X;X;X;X;X;Deamidation 18O (N);X;X;X;X;X;X;X;X;X;X;X;X;X;X;X
441	A0A384MDM4	Epididymis secretory sperm binding protein		A0A384MDM4	1	241.555	8.8439e-68	241.56	232.96	241.56	1	66.7057	0.0145604	66.706	1	145.52	1.4454e-14	145.52	1	66.9887	0.0294362	66.989	1	65.1792	4.97666e-30	198.74					1	98.8653	0.00121457	98.865	1	187.112	2.50885e-30	202.15	1	203.869	1.77753e-30	203.87	1	241.555	8.8439e-68	241.56	N	LGKAWGTPCEMCPAVNTSEYKILCPGGEGFR	X;X;X;X;X;X;X;X;X;X;Oxidation (M);X;X;X;X;Deamidation 18O (N);X;X;X;X;X;X;X;X;X;X;X;X;X;X;X
442	A0A384MDM4	Epididymis secretory sperm binding protein		A0A384MDM4	1	77.6404	0.0114591	77.64	59.329	77.64													1	77.6404	0.0114591	77.64																					N	NGICENLRGTYKCICNSGYEVDSTGKNCVDI	X;X;X;X;X;X;X;X;X;X;X;X;X;X;X;Deamidation 18O (N);X;X;X;X;X;X;X;X;X;X;X;X;X;X;X
443	A0A384MDM4	Epididymis secretory sperm binding protein		A0A384MDM4	1	179.947	1.10999e-46	209.9	209.9	179.95													1	92.9925	3.13223e-32	187.06									1	155.011	7.73087e-26	155.01	1	42.7051	1.10999e-46	209.9	1	179.947	2.01067e-31	179.95	N	WIGDGIKCTDLDECSNGTHMCSQHADCKNTM	X;X;X;X;X;X;X;X;X;X;X;X;X;X;X;Deamidation 18O (N);X;X;X;Oxidation (M);X;X;X;X;X;X;X;X;X;X;X
444	A0A384MDM4	Epididymis secretory sperm binding protein		A0A384MDM4	1	85.2117	0.00242985	145.16	140.58	85.212													1	145.156	0.00242985	145.16	1	85.2117	0.027071	85.212																	N	TMCLDINECERDACGNGTCRNTIGSFNCRCN	X;X;X;X;X;X;X;X;X;X;X;X;X;X;X;Deamidation 18O (N);X;X;X;X;X;X;X;X;X;X;X;X;X;X;X
445	A0A384MDM4	Epididymis secretory sperm binding protein		A0A384MDM4	1	175.514	1.41694e-26	225.4	221.47	175.51					1	85.8618	0.0228582	85.862	1	68.625	0.0415433	68.625	1	218.548	2.69694e-19	218.55					1	66.6213	0.0443975	66.621	1	225.404	1.41694e-26	225.4	1	149.188	0.00227395	149.19	1	175.514	0.00275603	175.51	N	KCRCDSGFALDSEERNCTDIDECRISPDLCG	X;X;X;X;X;X;X;X;X;X;X;X;X;X;X;Deamidation 18O (N);X;X;X;X;X;X;X;X;X;X;X;X;X;X;X
446	A0A384MDM4	Epididymis secretory sperm binding protein		A0A384MDM4	1	92.7735	1.5955e-86	230.5	217.53	194.13													1	84.4271	1.53626e-53	215.96									1	89.17	1.5955e-86	230.5	1	92.7735	2.13743e-33	194.13	1	83.4756	2.5597e-45	212.24	N	MDMRRSLCYRNYYADNQTCDGELLFNMTKKM	X;X;X;X;X;X;X;X;X;X;X;X;X;X;X;Deamidation 18O (N);X;X;X;X;X;X;X;X;X;Deamidation 18O (N);Oxidation (M);X;X;X;X
447	A0A384MDM4	Epididymis secretory sperm binding protein		A0A384MDM4	1	203.418	1.5955e-86	230.5	217.53	212.24													1	206.911	1.53626e-53	215.96									1	185.359	1.5955e-86	230.5	1	185.746	2.13743e-33	194.13	1	203.418	2.5597e-45	212.24	N	NYYADNQTCDGELLFNMTKKMCCCSYNIGRA	X;X;X;X;X;Deamidation 18O (N);X;X;X;X;X;X;X;X;X;Deamidation 18O (N);Oxidation (M);X;X;X;X;X;X;X;X;X;X;X;X;X;X
448	A0A384MDM4	Epididymis secretory sperm binding protein		A0A384MDM4	1	199.333	1.36826e-32	224.75	190.86	199.33	1	152.696	1.6025e-09	152.7	1	157.378	2.12341e-09	157.38	1	195.511	2.953e-13	195.51	1	202.559	2.28938e-17	202.56	1	224.754	1.36826e-32	224.75	1	221.5	1.57461e-31	221.5	1	125.226	4.75706e-10	180.15	1	185.769	1.51408e-10	185.77	1	199.333	4.06612e-17	199.33	N	EYLYPSREPPRVLPVNVTDYCQLVRYLCQNG	X;X;X;X;X;X;X;X;X;X;X;X;X;X;X;Deamidation 18O (N);X;X;X;X;X;X;X;X;X;X;X;X;X;X;X
449	A0A384MDP3	Epididymis secretory sperm binding protein		A0A384MDP3	1	119.018	2.65838e-69	207.39	181.1	119.02					1	67.4165	7.36948e-43	144.97					1	52.5225	0.00942231	52.522	1	45.3301	0.0351222	45.33					1	91.6568	3.54971e-39	155.22	1	93.9664	2.65838e-69	207.39	1	119.018	1.88284e-56	188.47	N	DVVFVIDSSESIGYTNFTLEKNFVINVVNRL	X;X;X;X;X;X;X;X;X;X;X;X;X;X;X;Deamidation 18O (N);X;X;X;X;X;X;X;X;X;X;X;X;X;X;X
450	A0A384MDP3	Epididymis secretory sperm binding protein		A0A384MDP3	1	58.0727	0	387.96	359.78	58.073	1	355.056	0	355.06	1	189.071	4.01168e-86	259.75	1	387.958	0	387.96	1	58.0727	0	354.38	1	53.9665	1.30905e-12	147.56	1	72.9579	6.38254e-157	290.61	1	154.672	0	355.74	1	173.188	6.49296e-203	311.77	1	131.027	2.58836e-181	307.59	N	ISSFRRGTFTDCALANMTEQIRQDRSKGTVH	X;X;X;X;X;X;X;X;X;X;X;X;X;X;X;Deamidation 18O (N);Oxidation (M);X;X;X;X;X;X;X;X;X;X;X;X;X;X
451	A0A384MDP3	Epididymis secretory sperm binding protein		A0A384MDP3	1	66.6332	9.16583e-165	274.11	262.71	66.633	1	199.46	7.24522e-63	199.46	1	48.6341	4.95877e-116	246.31	1	143.05	6.80976e-147	265.64	1	103.632	9.16583e-165	274.11	1	207.549	4.24203e-70	207.55	1	183.39	1.2051e-53	183.39	1	75.0441	3.57284e-42	150.91	1	58.3568	8.47136e-104	242.64	1	66.6332	3.98241e-116	247.54	N	HAELSFVFLTDGVTGNDSLHESAHSMRKQNV	X;X;X;X;X;X;X;X;X;X;X;X;X;X;X;Deamidation 18O (N);X;X;X;X;X;X;X;X;X;Oxidation (M);X;X;X;X;X
452	A0A384MDP3	Epididymis secretory sperm binding protein		A0A384MDP3	1	166.549	1.78985e-46	240.12	199.77	166.55	1	145.987	9.4465e-06	145.99	1	161.19	1.08836e-05	161.19	1	139.858	1.17703e-05	139.86	1	240.122	1.78985e-46	240.12	1	149.231	7.51175e-06	149.23	1	158.406	9.32324e-06	158.41	1	119.274	6.24372e-06	152.07	1	140.075	1.66899e-09	153.12	1	166.549	9.32324e-06	166.55	N	ENLYSIACDKPQQVRNMTLFSDLVAEKFIDD	X;X;X;X;X;X;X;X;X;X;X;X;X;X;X;Deamidation 18O (N);Oxidation (M);X;X;X;X;X;X;X;X;X;X;X;X;X;X
453	A0A3B3IUC0	Integral membrane protein 2B	ITM2B	A0A3B3IUC0	1	116.546	2.00861e-12	150.94	138.17	116.55	1	125.74	3.86672e-09	125.74	1	150.942	2.00861e-12	150.94	1	125.217	3.83592e-05	125.22	1	116.546	0.000233081	116.55																					N	AYLDLNLDKCYVIPLNTSIVMPPRNLLELLI	X;X;X;X;X;X;X;X;X;X;X;X;X;X;X;Deamidation 18O (N);X;X;X;X;X;X;X;X;X;X;X;X;X;X;X
454	A0A384MDV6	Carboxypeptidase Z, isoform CRA_b (Epididymis secretory sperm binding protein)	CPZ hCG_16447	A0A384MDV6	0.999929	41.4603	1.03762e-07	88.551	66.33	88.551													0.998663	28.732	0.00369096	69.081					0.999929	41.4603	1.03762e-07	88.551													N	TCVDLQLRTCSDAAYNHTTFPNLLQHRSWEV	X;X;X;X;X;X;X;X;X;X;X;X;X;X;X;Deamidation 18O (N);X;X;X;X;X;X;X;X;X;X;X;X;X;X;X
455	B4DNT6	cDNA FLJ53631, highly similar to Intercellular adhesion molecule 1		B4DNT6	1	170.215	4.74197e-28	178.83	127.86	170.22	1	175.376	0.00278321	175.38	1	155.103	0.00281898	155.1	1	145.633	0.00241138	145.63	1	160.106	0.00375501	160.11	1	131.062	0.00187569	131.06	1	178.831	0.00210187	178.83	1	167.229	4.74197e-28	167.23	1	170.215	0.00380095	170.22					N	NLTLRCQVEGGAPRANLTVVLLRGEKELKRE	X;X;X;X;X;X;X;X;X;X;X;X;X;X;X;Deamidation 18O (N);X;X;X;X;X;X;X;X;X;X;X;X;X;X;X
456	B4DNT6	cDNA FLJ53631, highly similar to Intercellular adhesion molecule 1		B4DNT6	1	64.4386	0.000207486	131.09	126.47	64.439	1	112.845	0.00109086	112.85	1	121.608	0.000254316	121.61	1	127.514	0.000207486	127.51	1	131.087	0.00029918	131.09	1	56.043	0.0275215	56.043	1	120.653	0.000304138	120.65	1	89.8266	0.00610275	89.827	1	96.1713	0.00517534	96.171	1	64.4386	0.0247503	64.439	N	EVTTTVLVRRDHHGANFSCRTELDLRPQGLE	X;X;X;X;X;X;X;X;X;X;X;X;X;X;X;Deamidation 18O (N);X;X;X;X;X;X;X;X;X;X;X;X;X;X;X
457	B4DNT6	cDNA FLJ53631, highly similar to Intercellular adhesion molecule 1		B4DNT6	1	142.106	8.0575e-14	155.88	129.84	155.88	1	75.3058	0.00428227	80.69	1	78.5093	0.00329464	84.169	0.999999	62.0722	0.019858	67.456					1	70.163	0.00813721	75.479	1	74.8774	0.00357473	83.182	1	142.106	8.0575e-14	155.88	1	133.369	4.13222e-12	150.14	0.999996	53.9723	0.029965	63.76	N	LALGDQRLNPTVTYGNDSFSAKASVSVTAED	X;X;X;X;X;X;X;X;X;X;X;X;X;X;X;Deamidation 18O (N);X;X;X;X;X;X;X;X;X;X;X;X;X;X;X
460	P51884	Lumican (Keratan sulfate proteoglycan lumican) (KSPG lumican)	LUM LDC SLRR2D	P51884	1	51.8878	7.77303e-21	161.32	145.38	51.888	1	51.5913	1.66651e-16	144.12	0.487529	2.2744	1.8551e-14	144.12	0.353985	0	3.5296e-05	110.22	1	51.8878	5.50916e-07	122.34	0.552307	0	0.0228736	48.314	0.476748	2.11986	1.81468e-08	132.05	0.858834	7.28951	1.02527e-06	120.3	0.670359	5.21091	7.77303e-21	161.32	0.974994	15.122	1.27725e-14	146.47	N	GRVFSKLKQLKKLHINHNNLTESVGPLPKSL	X;X;X;X;X;X;X;X;X;X;X;X;X;X;X;Deamidation 18O (N);X;Deamidation 18O (N);Deamidation 18O (N);X;X;X;X;X;X;X;X;X;X;X;X
461	P51884	Lumican (Keratan sulfate proteoglycan lumican) (KSPG lumican)	LUM LDC SLRR2D	P51884	1	51.8878	7.50834e-17	144.33	137.9	51.888	1	51.5913	9.3714e-11	133.71					0.353985	0	3.5296e-05	110.22	1	51.8878	0.00108503	79.013	0.552307	0	0.0253701	46.663					0.991412	20.6191	0.000220088	98.531	0.526336	0	2.73926e-08	128.69	0.524375	1.1929	7.50834e-17	144.33	N	VFSKLKQLKKLHINHNNLTESVGPLPKSLED	X;X;X;X;X;X;X;X;X;X;X;X;X;Deamidation 18O (N);X;Deamidation 18O (N);Deamidation 18O (N);X;X;X;X;X;X;X;X;X;X;X;X;X;X
462	P51884	Lumican (Keratan sulfate proteoglycan lumican) (KSPG lumican)	LUM LDC SLRR2D	P51884	1	51.8878	1.592e-276	330.42	269.21	51.888	1	51.5913	1.45789e-146	288.25	0.984156	18.0333	9.30127e-276	300.33	0.988561	19.3679	1.66937e-80	244.88	1	51.8878	1.37774e-266	326.81	0.997147	25.44	1.20209e-188	300.07	0.989053	19.5688	4.64917e-239	320.57	0.998944	29.7216	3.81735e-109	264.09	0.998333	27.7974	1.592e-276	330.42	0.997613	26.2224	6.33516e-276	322.58	N	FSKLKQLKKLHINHNNLTESVGPLPKSLEDL	X;X;X;X;X;X;X;X;X;X;X;X;Deamidation 18O (N);X;Deamidation 18O (N);Deamidation 18O (N);X;X;X;X;X;X;X;X;X;X;X;X;X;X;X
463	P51884	Lumican (Keratan sulfate proteoglycan lumican) (KSPG lumican)	LUM LDC SLRR2D	P51884	1	44.3907	0	429.76	395.76	44.391	1	136.655	2.18964e-65	230.29	1	44.3907	2.71402e-104	253.36	1	165.86	5.16692e-201	306	1	157.487	1.95189e-225	314.17	1	137.382	9.6979e-121	269.51	1	128.81	2.4326e-120	267.38	1	229.14	0	429.76	1	224.791	0	388.9	1	193.49	2.25449e-200	300.55	N	THNKITKLGSFEGLVNLTFIHLQHNRLKEDA	X;X;X;X;X;X;X;X;X;X;X;X;X;X;X;Deamidation 18O (N);X;X;X;X;X;X;X;X;Deamidation 18O (N);X;X;X;X;X;X
464	P51884	Lumican (Keratan sulfate proteoglycan lumican) (KSPG lumican)	LUM LDC SLRR2D	P51884	1	65.8978	4.28886e-30	123.72	69.626	123.72	0.972105	15.5886	0.00781091	43.579	1	65.8978	4.28886e-30	123.72	0.928413	11.1266	6.68159e-10	88.191					0.526858	0.486007	0.000136943	53.968									0.988213	19.2337	4.3256e-14	87.749					N	LRLSHNELADSGIPGNSFNVSSLVELDLSYN	X;X;X;X;X;X;X;X;X;X;X;X;X;X;X;Deamidation 18O (N);X;X;Deamidation 18O (N);X;X;X;X;X;X;X;X;X;X;X;X
465	P51884	Lumican (Keratan sulfate proteoglycan lumican) (KSPG lumican)	LUM LDC SLRR2D	P51884	1	73.7551	3.5482e-103	222.95	159.86	123.72	0.999963	44.3768	4.43739e-65	173.95	1	73.7551	1.12152e-77	204.88	0.999987	48.8656	1.10626e-84	209.65	0.999983	47.582	2.64496e-94	221.73	0.995627	23.5735	5.55109e-58	167.97	0.998981	29.9148	2.63562e-67	182.07	0.999953	43.2815	1.67299e-94	222.95	0.999944	42.5195	3.5482e-103	206.93	0.999862	38.5942	1.04521e-75	194.62	N	SHNELADSGIPGNSFNVSSLVELDLSYNKLK	X;X;X;X;X;X;X;X;X;X;X;X;Deamidation 18O (N);X;X;Deamidation 18O (N);X;X;X;X;X;X;X;X;X;X;X;X;X;X;X
466	D9IWP9	Beta-2-glycoprotein I (Fragment)		D9IWP9	1	72.4254	8.94918e-271	307.86	296.73	72.425	1	151.046	2.18899e-35	151.05	1	57.803	7.50699e-106	233.33	1	248.945	3.26095e-131	248.95	1	100.949	3.18036e-180	273.41									1	167.227	8.94918e-271	307.86	1	183.857	1.5097e-245	299.05	1	72.4254	6.14327e-94	220.67	N	DTAVFECLPQHAMFGNDTITCTTHGNWTKLP	X;X;X;X;X;X;X;X;X;X;X;X;Oxidation (M);X;X;Deamidation 18O (N);X;X;X;X;X;X;X;X;X;Deamidation 18O (N);X;X;X;X;X
467	D9IWP9	Beta-2-glycoprotein I (Fragment)		D9IWP9	1	72.4254	8.94918e-271	307.86	296.73	72.425	1	151.046	2.18899e-35	151.05	1	57.803	7.50699e-106	233.33	1	248.945	3.26095e-131	248.95	1	100.949	3.18036e-180	273.41									1	167.227	8.94918e-271	307.86	1	183.857	1.5097e-245	299.05	1	72.4254	6.14327e-94	220.67	N	HAMFGNDTITCTTHGNWTKLPECREVKCPFP	X;X;Oxidation (M);X;X;Deamidation 18O (N);X;X;X;X;X;X;X;X;X;Deamidation 18O (N);X;X;X;X;X;X;X;X;X;X;X;X;X;X;X
468	D9IWP9	Beta-2-glycoprotein I (Fragment)		D9IWP9	1	128.811	2.7167e-18	212.21	198.3	128.81	1	185.295	4.33281e-06	185.29	1	84.1976	3.89666e-06	185.61	1	84.6583	2.10238e-05	177.78	1	212.21	2.7167e-18	212.21	1	81.0165	5.34566e-05	128.17	1	146.106	3.00693e-05	146.11	1	183.673	6.58725e-06	183.67	1	99.5681	2.7167e-18	212.21	1	128.811	9.63966e-13	204.52	N	YSLDGPEEIECTKLGNWSAMPSCKASCKVPV	X;X;X;X;X;X;X;X;X;X;X;X;X;X;X;Deamidation 18O (N);X;X;X;Oxidation (M);X;X;X;X;X;X;X;X;X;X;X
469	D9IWP9	Beta-2-glycoprotein I (Fragment)		D9IWP9	0.999277	31.4059	1.3556e-32	187.97	170.76	148.62	0.995879	23.8317	1.097e-07	141.54	0.997708	26.3875	3.47164e-09	154.1	0.996779	24.9063	1.3556e-32	162.93	0.996921	25.102	2.47936e-18	173.72	0.999277	31.4059	3.88331e-08	148.62	0.996367	24.3815	1.2295e-05	141.58	0.998365	27.8584	1.22897e-08	161.99	0.997022	25.2471	4.82422e-11	187.97	0.998432	28.0403	4.16657e-09	147.66	N	IPTFATLRVYKPSAGNNSLYRDTAVFECLPQ	X;X;X;X;X;X;X;X;X;X;X;X;X;X;X;Deamidation 18O (N);X;X;X;X;X;X;X;X;X;X;X;X;X;X;X
470	A0A384NKS6	Clusterin		A0A384NKS6	1	251.645	0	356.68	291.96	251.64	1	58.7431	3.62241e-26	230.73	1	90.1036	0	356.68	1	262.321	4.05723e-240	326.24	1	220.173	3.94393e-70	244.28	1	97.6331	0.00310464	178.6	1	47.977	0.00117892	181.81	1	131.418	0	349.89	1	63.6941	0	329.15	1	251.645	0	350.93	N	LSNLEEAKKKKEDALNETRESETKLKELPGV	X;X;X;X;X;X;X;X;X;X;X;X;X;X;X;Deamidation 18O (N);X;X;X;X;X;X;X;X;X;X;X;X;X;X;X
471	A0A384NKS6	Clusterin		A0A384NKS6	1	62.1662	3.84757e-39	234.91	203.91	62.166	1	113.379	2.09149e-30	234.91	1	62.1662	5.02161e-05	165.78	1	79.3106	3.53104e-05	154.12	1	86.8328	1.88121e-10	214.81	1	209.873	3.84757e-39	209.87	1	122.176	0.00580704	122.18	1	79.5963	1.56424e-09	209.11	1	70.8559	4.09436e-05	174.23	1	153.036	0.00813891	153.04	N	REGDDDRTVCREIRHNSTGCLRMKDQCDKCR	X;X;X;X;X;X;X;X;X;X;X;X;X;X;X;Deamidation 18O (N);X;X;X;X;X;X;Oxidation (M);X;X;X;X;X;X;X;X
472	A0A384NKS6	Clusterin		A0A384NKS6	1	144.151	4.7156e-150	276.34	264.54	144.15	1	45.3692	1.62146e-19	137.36	1	45.6957	4.50864e-76	225.37	1	276.336	4.7156e-150	276.34	1	154.073	2.06484e-31	154.07					1	95.48	8.22897e-11	95.48	1	102.803	5.15863e-50	203.78	1	62.1903	1.6743e-38	166.79	1	144.151	6.72753e-66	221.44	N	TRESETKLKELPGVCNETMMALWEECKPCLK	X;X;X;X;X;X;X;X;X;X;X;X;X;X;X;Deamidation 18O (N);X;X;Oxidation (M);Oxidation (M);X;X;X;X;X;X;X;X;X;X;X
473	A0A384NKS6	Clusterin		A0A384NKS6	1	69.3488	0	393.42	369.19	69.349	1	198.625	0	386.44	1	88.441	4.12148e-234	264.28	1	78.692	0	360.32	1	138.449	4.02587e-216	322.01	1	59.5419	0	393.42	1	91.936	0	385.54	1	158.563	1.40186e-293	337.64	1	264.277	3.51325e-169	300.5	1	69.3488	0	373.2	N	LEQLNEQFNWVSRLANLTQGEDQYYLRVTTV	X;X;X;X;Deamidation 18O (N);X;X;X;Deamidation 18O (N);X;X;X;X;X;X;Deamidation 18O (N);X;X;X;X;X;X;X;X;X;X;X;X;X;X;X
474	A0A384NKS6	Clusterin		A0A384NKS6	1	215.775	0	423.1	373.98	250.46	1	206.531	0	384.67	1	297.65	0	423.1	1	273.07	0	346.63	1	253.668	1.4523e-251	319.91	1	244.727	1.10783e-200	302.41	1	213.751	1.6431e-200	299.89	1	160.861	2.47778e-252	324.94	1	251.707	0	410.07	1	215.775	0	369.51	N	RKYNELLKSYQWKMLNTSSLLEQLNEQFNWV	X;X;X;X;X;X;X;X;X;X;X;X;X;Oxidation (M);X;Deamidation 18O (N);X;X;X;X;X;X;X;X;Deamidation 18O (N);X;X;X;Deamidation 18O (N);X;X
475	A0A384NKS6	Clusterin		A0A384NKS6	1	79.3523	1.07585e-204	250.46	216.41	250.46	0.99998	46.911	1.96893e-48	162.37	0.99342	21.7875	0.0231651	61.212	0.654436	2.77549	0.0284515	58.158	0.5	0	1.83893e-08	110.98									1	68.819	1.58932e-60	194.55	0.989843	19.8879	0.0068687	73.834	1	79.3523	1.07585e-204	250.46	N	YQWKMLNTSSLLEQLNEQFNWVSRLANLTQG	X;X;X;X;Oxidation (M);X;Deamidation 18O (N);X;X;X;X;X;X;X;X;Deamidation 18O (N);X;X;X;X;X;X;X;X;X;X;Deamidation 18O (N);X;X;X;X
476	A0A384NKS6	Clusterin		A0A384NKS6	0.874291	8.4229	3.21401e-49	167.55	144.54	167.55									0.874291	8.4229	3.21401e-49	167.55	0.5	0	1.83893e-08	110.98																					N	MLNTSSLLEQLNEQFNWVSRLANLTQGEDQY	Oxidation (M);X;Deamidation 18O (N);X;X;X;X;X;X;X;X;X;X;X;X;Deamidation 18O (N);X;X;X;X;X;X;Deamidation 18O (N);X;X;X;X;X;X;X;X
477	A0A384NKS6	Clusterin		A0A384NKS6;Q6LDQ3	1	83.5305	6.39615e-11	115.57	100.19	83.53	1	67.9969	6.39615e-11	115.57	1	83.5305	0.00236682	83.53																													N	RSGSGLVGRQLEEFLNQSSPFYFWMNGDRID	X;X;X;X;X;X;X;X;X;X;X;X;X;X;X;Deamidation 18O (N);X;X;X;X;X;X;X;X;Oxidation (M);Deamidation 18O (N);X;X;X;X;X
478	A0A384NKS6	Clusterin		A0A384NKS6;Q6LDQ3	1	83.5305	6.39615e-11	115.57	100.19	83.53	1	67.9969	6.39615e-11	115.57	1	83.5305	0.00236682	83.53																													N	LEEFLNQSSPFYFWMNGDRIDSLLENDRQ__;LEEFLNQSSPFYFWMNGDRIDSLLENDRQQT	X;X;X;X;X;Deamidation 18O (N);X;X;X;X;X;X;X;X;Oxidation (M);Deamidation 18O (N);X;X;X;X;X;X;X;X;X;X;X;X;X;X;X
479	B7Z766	cDNA FLJ54564, highly similar to 150 kDa oxygen-regulated protein (Orp150)		B7Z766	1	117.2	4.12091e-06	117.2	90.45	117.2													1	111.388	0.000850858	111.39													1	117.2	4.12091e-06	117.2					N	PRPKDKNGTRAEPPLNASASDQGEKVIPPAG	X;X;X;X;X;X;X;X;X;X;X;X;X;X;X;Deamidation 18O (N);X;X;X;X;X;X;X;X;X;X;X;X;X;X;X
480	B7Z766	cDNA FLJ54564, highly similar to 150 kDa oxygen-regulated protein (Orp150)		B7Z766	1	309.875	0	347.76	324.01	309.87					1	210.336	7.26503e-46	210.34	1	161.629	1.94475e-28	161.63	1	246.859	3.42498e-90	246.86									1	223.699	4.29549e-55	223.7	1	347.762	0	347.76	1	309.875	5.15265e-225	309.87	N	ISSLFGGGTTPDAKENGTDTVQEEEESPAEG	X;X;X;X;X;X;X;X;X;X;X;X;X;X;X;Deamidation 18O (N);X;X;X;X;X;X;X;X;X;X;X;X;X;X;X
481	B7Z766	cDNA FLJ54564, highly similar to 150 kDa oxygen-regulated protein (Orp150)		B7Z766	0.999996	53.5059	1.35654e-08	138.68	97.306	138.68													0.997959	26.893	0.000445947	104.45									0.9476	12.5729	0.00340953	72.819	0.999996	53.5059	1.35654e-08	138.68					N	RKKWPERLSALDNLLNHSSMFLKGARLIPEM	X;X;X;X;X;X;X;X;X;X;X;X;X;X;X;Deamidation 18O (N);X;X;X;X;X;X;X;X;X;X;X;X;X;X;X
482	B7Z766	cDNA FLJ54564, highly similar to 150 kDa oxygen-regulated protein (Orp150)		B7Z766	1	121.733	2.31557e-05	149.72	92.44	121.73													1	112.748	0.00406668	112.75					1	117.698	0.00233319	117.7	1	130.656	4.36015e-05	130.66	1	149.721	2.31557e-05	149.72	1	121.733	0.000356927	121.73	N	LGFLGPEDLRVFGSQNLTTVKLKGVGDSFKK	X;X;X;X;X;X;X;X;X;X;X;X;X;X;X;Deamidation 18O (N);X;X;X;X;X;X;X;X;X;X;X;X;X;X;X
483	B7Z766	cDNA FLJ54564, highly similar to 150 kDa oxygen-regulated protein (Orp150)		B7Z766	1	95.7414	0.0181561	95.741	58.014	95.741													1	89.698	0.0210989	89.698									1	91.318	0.02031	91.318	1	93.1624	0.0194119	93.162	1	95.7414	0.0181561	95.741	N	QIFTEVEMTTLEKVINETWAWKNATLAEQAK	X;X;X;X;X;X;X;X;X;X;X;X;X;X;X;Deamidation 18O (N);X;X;X;X;X;X;Deamidation 18O (N);X;X;X;X;X;X;X;X
484	H0Y8G4	ADP-ribosyl cyclase/cyclic ADP-ribose hydrolase 2 (Fragment)	BST1	H0Y8G4	1	42.2538	2.04399e-13	130.89	119.03	42.254													1	130.885	2.04399e-13	130.89																	1	42.2538	0.0295124	42.254	N	IQYSKDSSGVIHVMLNGSEPTGAYPIKGFFA	X;X;X;X;X;X;X;X;X;X;X;X;X;X;X;Deamidation 18O (N);X;X;X;X;X;X;X;X;X;X;X;X;X;X;X
485	A0A3B3IRL2	Cellular repressor of E1A-stimulated genes 1, isoform CRA_a (Protein CREG1)	CREG1 hCG_41319	A0A3B3IRL2	1	96.0344	0.000311055	132.01	110.56	96.034					1	116.305	0.00120778	116.3	1	94.6917	0.012262	94.692	1	132.01	0.000311055	132.01									1	109.79	0.00463634	109.79	1	107.788	0.000552	121.83	1	96.0344	0.0230359	105.2	N	PLCVHIMLSGTVTKVNETEMDIAKHSLFIRH	X;X;X;X;X;X;X;X;X;X;X;X;X;X;X;Deamidation 18O (N);X;X;X;Oxidation (M);X;X;X;X;X;X;X;X;X;X;X
486	B4DJU3	cDNA FLJ50742, highly similar to Inositol 1,4,5-trisphosphate receptor type 1		B4DJU3	1	101.954	0.00445081	101.95	65.261	101.95													1	75.294	0.0186142	75.294													1	101.954	0.00445081	101.95					N	SEFLFSDVCRVESGENCSSPAPREELVPAEE	X;X;X;X;X;X;X;X;X;X;X;X;X;X;X;Deamidation 18O (N);X;X;X;X;X;X;X;X;X;X;X;X;X;X;X
487	C9JY01	Translocon-associated protein subunit alpha (Fragment)	SSR1	C9JY01	0.500005	0	2.70584e-22	134.24	105.95	81.448													0.5	0	2.70584e-22	134.24													0.500005	0	4.00835e-05	81.448					N	GRPFGLVINLNYKDLNGNVFQDAVFNQTVTV	X;X;X;X;X;X;X;X;X;X;X;X;X;X;X;Deamidation 18O (N);X;X;X;X;X;X;X;X;X;Deamidation 18O (N);X;X;X;X;X
488	C9JY01	Translocon-associated protein subunit alpha (Fragment)	SSR1	C9JY01	0.500005	0	2.70584e-22	134.24	105.95	81.448													0.5	0	2.70584e-22	134.24													0.500005	0	4.00835e-05	81.448					N	PFGLVINLNYKDLNGNVFQDAVFNQTVTVIE	X;X;X;X;X;X;X;X;X;X;X;X;X;X;X;X;X;X;X;X;X;X;X;X;X;X;X;X;X;X;X
489	C9JY01	Translocon-associated protein subunit alpha (Fragment)	SSR1	C9JY01	1	183.721	6.95966e-182	241.93	216.75	241.93													1	183.721	6.95966e-182	241.93													0.999999	61.9448	9.54313e-08	97.836					N	NYKDLNGNVFQDAVFNQTVTVIEREDGLDGE	X;X;X;X;X;Deamidation 18O (N);X;X;X;X;X;X;X;X;X;Deamidation 18O (N);X;X;X;X;X;X;X;X;X;X;X;X;X;X;X
490	A0A3B3IS66	Coagulation factor XIII B chain (Fragment)	F13B	A0A3B3IS66	1	193.19	4.30788e-35	193.19	179.76	193.19													1	193.19	4.30788e-35	193.19																					N	IKHGVIISSTVDTYENGSSVEYRCFDHHFLE	X;X;X;X;X;X;X;X;X;X;X;X;X;X;X;Deamidation 18O (N);X;X;X;X;X;X;X;X;X;X;X;X;X;X;X
491	B4E1B0	cDNA FLJ54318, highly similar to Complement C1r subcomponent		B4E1B0	1	137.831	0.00270629	143.97	19.111	137.83													1	143.975	0.00270629	143.97													1	137.831	0.0298397	137.83					N	SSLEYPRSYPPDLRCNYSIRVERGLTLHLKF	X;X;X;X;X;X;X;X;X;X;X;X;X;X;X;Deamidation 18O (N);X;X;X;X;X;X;X;X;X;X;X;X;X;X;X
492	B4E1B0	cDNA FLJ54318, highly similar to Complement C1r subcomponent		B4E1B0	1	211.609	0	359.54	338.65	359.54																													1	211.609	0	359.54	1	148.414	2.27542e-45	190.8	N	TAAHTLYPKEHEAQSNASLDVFLGHTNVEEL	X;X;X;X;X;X;X;X;X;X;X;X;X;X;X;Deamidation 18O (N);X;X;X;X;X;X;X;X;X;X;X;X;X;X;X
493	A0A3B3ISX9	Tenascin-X	TNXB	A0A3B3ISX9	1	178.222	2.41345e-10	204.7	139.66	178.22	1	130.748	0.000660596	130.75	1	159.368	0.001135	159.37	1	166.161	0.00168393	166.16	1	195.573	1.3254e-06	195.57	1	166.161	0.00168393	166.16	1	204.699	2.41345e-10	204.7	1	192.918	3.10979e-06	192.92	1	198.583	9.73123e-10	198.58	1	178.222	0.000810574	178.22	N	DLERHLRAHGYPLRANQTYTSVARHIHEYLQ	X;X;X;X;X;X;X;X;X;X;X;X;X;X;X;Deamidation 18O (N);X;X;X;X;X;X;X;X;X;X;X;X;X;X;X
494	A0A3B3ISX9	Tenascin-X	TNXB	A0A3B3ISX9	1	264.003	1.55052e-251	318.62	289.31	264	1	216.684	1.05761e-137	216.68	1	258.36	1.46378e-104	258.36	1	208.465	5.69265e-46	208.47	1	181.337	1.55052e-251	318.62	1	186.676	2.78374e-31	186.68	1	202.399	2.32906e-39	202.4	1	186.36	9.31388e-157	282.35	1	286.435	3.8231e-157	286.44	1	264.003	6.32322e-120	264	N	LHTNYTATVRGLRGPNLTSPASITFTTGLEA	X;X;X;X;X;X;X;X;X;X;X;X;X;X;X;Deamidation 18O (N);X;X;X;X;X;X;X;X;X;X;X;X;X;X;X
495	A0A3B3ISX9	Tenascin-X	TNXB	A0A3B3ISX9	1	171.756	7.51603e-09	188.91	121.45	171.76													1	188.907	7.51603e-09	188.91	1	52.5758	0.0416143	52.576					1	171.756	1.74281e-05	171.76									N	PPRPSLSQPPRRPWGNLTAELSRFRGTVQDL	X;X;X;X;X;X;X;X;X;X;X;X;X;X;X;Deamidation 18O (N);X;X;X;X;X;X;X;X;X;X;X;X;X;X;X
496	A0A3B3ISX9	Tenascin-X	TNXB	A0A3B3ISX9	1	181.615	1.81954e-104	194.36	185.67	181.62													1	122.882	4.80517e-44	122.88									1	41.5635	1.81954e-104	194.36					1	181.615	3.40173e-99	181.62	N	VLLSTARAGPFSSRSNVTLPAPRPPPQPGGH	X;X;X;X;X;X;X;X;X;X;X;X;X;X;X;Deamidation 18O (N);X;X;X;X;X;X;X;X;X;X;X;X;X;X;X
497	B4DF84	cDNA FLJ60463, highly similar to Homo sapiens glycosyltransferase 25 domain containing 2 (GLT25D2), mRNA		B4DF84	1	87.3226	0.0189009	100.19	49.222	87.323					1	80.2291	0.0314765	80.229					1	100.188	0.0189009	100.19													1	87.3226	0.0365807	87.323					N	EIEVKIVEAVDGKALNTSQLKALNIEMLPGY	X;X;X;X;X;X;X;X;X;X;X;X;X;X;X;Deamidation 18O (N);X;X;X;X;X;X;X;X;X;X;X;X;X;X;X
498	B4DF84	cDNA FLJ60463, highly similar to Homo sapiens glycosyltransferase 25 domain containing 2 (GLT25D2), mRNA		B4DF84	1	82.5555	0	357.91	320.93	357.91					0.989294	19.6569	0.000622749	95.205					0.998377	27.8896	3.91954e-25	155.11													1	82.5555	0	357.91	0.983126	17.6538	3.63308e-08	120.53	N	KSRMAIWAATDHNVDNTTEIFRERLKNVQRL	X;X;X;X;X;X;X;X;X;X;X;X;X;X;X;Deamidation 18O (N);X;X;X;X;X;X;X;X;X;X;X;X;X;X;X
499	B7ZKN7	BLM protein	BLM	B7ZKN7	1	125.504	0.00337731	148.04	62.23	125.5													1	134.083	0.00355148	134.08									1	138.262	0.00337731	138.26	1	148.043	0.00340155	148.04	1	125.504	0.00484266	125.5	N	NFSESIQNYTDKSAQNLASRNLKHERFQSLS	X;X;X;X;X;X;X;X;X;X;X;X;X;X;X;Deamidation 18O (N);X;X;X;X;X;X;X;X;X;X;X;X;X;X;X
500	P35442	Thrombospondin-2	THBS2 TSP2	P35442	1	46.4609	0.0229051	46.461	42.741	46.461													1	46.4609	0.0229051	46.461																					N	RNMSACWQDGRFFAENETWVVDSCTTCTCKK	X;X;X;X;X;X;X;X;X;X;X;X;X;X;X;Deamidation 18O (N);X;X;X;X;X;X;X;X;X;X;X;X;X;X;X
501	P35442	Thrombospondin-2	THBS2 TSP2	P35442	1	166.692	1.42446e-109	276.35	238.05	166.69	1	140.075	6.06417e-07	140.07	1	204.174	6.28582e-17	204.17	1	164.109	6.24262e-09	164.11	1	47.9914	1.42446e-109	276.35	1	92.8564	0.00249319	92.856	1	127.424	4.03952e-09	156.69	1	164.109	6.24262e-09	164.11	1	152.467	3.11251e-09	152.47	1	166.692	1.05805e-12	166.69	N	PTRAYGYSGVSLKVVNSTTGTGEHLRNALWH	X;X;X;X;X;X;X;X;X;X;X;X;X;X;X;Deamidation 18O (N);X;X;X;X;X;X;X;X;X;X;X;X;X;X;X
502	A0PJ49	FGFRL1 protein (Fragment)	FGFRL1	A0PJ49	1	68.2235	0.00475286	114.5	77.928	68.224	1	68.2235	0.0421152	68.224	1	113.706	0.00537173	113.71	1	114.498	0.00475286	114.5	1	69.5982	0.0400654	69.598	1	68.2235	0.0421152	68.224																	N	SGKYTCRVSNRAGAINATYKVDVIQRTRSKP	X;X;X;X;X;X;X;X;X;X;X;X;X;X;X;Deamidation 18O (N);X;X;X;X;X;X;X;X;X;X;X;X;X;X;X
503	A0PJ49	FGFRL1 protein (Fragment)	FGFRL1	A0PJ49	1	241.398	1.17372e-154	283.82	219.61	241.4					1	162.26	3.86688e-05	162.26	1	128.88	5.06281e-05	128.88	1	81.5247	0.0113599	81.525									1	283.82	4.63004e-119	283.82	1	269.33	2.76987e-86	269.33	1	241.398	1.17372e-154	241.4	N	IQWLKRVEYGAEGRHNSTIDVGGQKFVVLPT	X;X;X;X;X;X;X;X;X;X;X;X;X;X;X;Deamidation 18O (N);X;X;X;X;X;X;X;X;X;X;X;X;X;X;X
504	B4DRZ0	cDNA FLJ61364, highly similar to Gamma-glutamyltransferase 4		B4DRZ0	1	61.4352	0.0218638	61.435	33.693	61.435													1	61.4352	0.0218638	61.435																					N	GLGGGGVMLVHDIRRNESHLIDFRESAPGAL	X;X;X;X;X;X;X;X;X;X;X;X;X;X;X;Deamidation 18O (N);X;X;X;X;X;X;X;X;X;X;X;X;X;X;X
505	B3KQX7	cDNA FLJ33256 fis, clone ASTRO2005557, highly similar to MAJOR PRION PROTEIN		B3KQX7	1	120.332	0.000322392	160.53	136.58	120.33	1	70.5516	0.0356088	70.552	1	160.531	0.00120313	160.53	1	105.396	0.00640126	105.4	1	123.596	0.000342386	123.6	1	72.6431	0.039685	72.643	1	82.2868	0.0237063	82.287	1	124.953	0.000322392	124.95	1	118.177	0.000985514	118.18	1	120.332	0.000729729	120.33	N	ITIKQHTVTTTTKGENFTETDVKMMERVVEQ	X;X;X;X;X;X;X;X;X;X;X;X;X;X;X;Deamidation 18O (N);X;X;X;X;X;X;X;X;X;X;X;X;X;X;X
506	A2A2S5	Ribosome-binding protein 1 (Fragment)	RRBP1	A2A2S5	1	65.467	0.0098171	65.467	46.871	65.467																													1	65.467	0.0098171	65.467					N	EEKPNGKIPDHDPAPNVTVLLREPVRAPAVA	X;X;X;X;X;X;X;X;X;X;X;X;X;X;X;Deamidation 18O (N);X;X;X;X;X;X;X;X;X;X;X;X;X;X;X
507	M0QYW8	L-amino-acid oxidase (Fragment)	IL4I1	M0QYW8	1	101.381	0.00443955	104.22	57.796	101.38													1	104.221	0.00443955	104.22	1	76.2819	0.0302323	76.282	1	101.381	0.00487473	101.38													N	SSHRILHKLCQGLGLNLTKFTQYDKNTWTEV	X;X;X;X;X;X;X;X;X;X;X;X;X;X;X;Deamidation 18O (N);X;X;X;X;X;X;X;X;X;X;X;X;X;X;X
508	B3KQB2	cDNA FLJ90112 fis, clone HEMBA1006707, highly similar to Matrilin-4		B3KQB2	1	128.976	1.27605e-41	179.36	174.47	128.98													1	115.536	9.83848e-09	115.54	1	98.1213	0.000362337	98.121	1	123.142	1.46349e-39	168.14	1	144.505	1.80522e-25	144.5	1	179.356	1.27605e-41	179.36	1	128.976	8.99431e-14	128.98	N	QDQRSCRAIDYCSFGNHSCQHECVSTPGGPR	X;X;X;X;X;X;X;X;X;X;X;X;X;X;X;Deamidation 18O (N);X;X;X;X;X;X;X;X;X;X;X;X;X;X;X
509	A5D8U1	Matrilin 4	MATN4	B3KQB2;A5D8U1	1	101.302	0.00104855	138.06	75.598	138.06									1	65.1166	0.0450524	98.009	1	81.9796	0.00201381	113.74					0.999721	35.5499	0.0460406	64.711					1	101.302	0.00104855	138.06	0.999919	40.8949	0.0365539	70.056	N	RQFLMGLLRGLNVGPNATRVGVIQYSSQVQS	X;X;X;X;X;X;X;X;X;X;X;X;X;X;X;Deamidation 18O (N);X;X;X;X;X;X;X;X;X;X;X;X;X;X;X
510	Q5T987	Inter-alpha-trypsin inhibitor heavy chain H2 (Fragment)	ITIH2	Q5T987	1	107.026	1.6201e-09	152.85	106.86	107.03	1	66.2667	0.0279549	66.267									1	152.854	1.6201e-09	152.85					1	103.909	0.00303975	103.91					1	60.539	0.0413315	60.539	1	107.026	0.00126212	107.03	N	NVVFDVQIPKGAFISNFSMTVDGKTFRSSIK	X;X;X;X;X;X;X;X;X;X;X;X;X;X;X;Deamidation 18O (N);X;X;X;X;X;X;X;X;X;X;X;X;X;X;X
511	H0YEA7	N-acetylglucosamine-1-phosphotransferase subunit gamma (Fragment)	GNPTG	H0YEA7	1	140.017	1.12911e-10	140.02	127.18	140.02	1	40.0847	3.85627e-08	130.56	1	100.042	0.000636156	100.04	1	140.017	1.12911e-10	140.02																									N	SLVESTYKYEFCPFHNVTQHEQTFRWNAYSG	X;X;X;X;X;X;X;X;X;X;X;X;X;X;X;Deamidation 18O (N);X;X;X;X;X;X;X;X;X;X;X;X;X;X;X
512	A3KC71	Nuclear envelope protein okuribin	okuribin	A3KC71	0.5	0	0.00196913	86.814	67.571	86.814													0.5	0	0.00196913	86.814																					N	MATRKISVITIFGPVNNSTMKIDHFQLDNEK	X;X;X;X;X;X;X;X;X;X;X;X;X;X;X;Deamidation 18O (N);X;X;X;Oxidation (M);X;X;X;X;X;X;X;X;X;X;X
513	A3KC71	Nuclear envelope protein okuribin	okuribin	A3KC71	0.9061	9.84512	2.84098e-14	167.2	116.43	112.51									0.817898	6.52385	3.66809e-14	167.2	0.775495	5.38353	2.84098e-14	160.86	0.9061	9.84512	0.000253443	112.51	0.813663	6.40146	6.86541e-06	128.08	0.813663	6.40146	5.42803e-10	128.08	0.664575	2.96948	0.00337242	79.492	0.720786	4.1187	0.00211054	99.281	N	ATRKISVITIFGPVNNSTMKIDHFQLDNEKP	X;X;X;X;X;X;X;X;X;X;X;X;X;X;X;Deamidation 18O (N);X;X;X;X;X;X;X;X;X;X;X;X;X;X;X
514	A3KC71	Nuclear envelope protein okuribin	okuribin	A3KC71	1	302.324	1.26691e-228	302.32	278.49	302.32																													1	248.061	2.19865e-115	248.06	1	302.324	1.26691e-228	302.32	N	GVGEEVGGVLELFPINGSSVVEREDVPAHLV	X;X;X;X;X;X;X;X;X;X;X;X;X;X;X;Deamidation 18O (N);X;X;X;X;X;X;X;X;X;X;X;X;X;X;X
515	V9GYR2	Sodium/potassium-transporting ATPase subunit beta (Fragment)	ATP1B1	V9GYR2	1	134.655	4.76814e-189	300.55	276.25	294.81	0.999413	32.3108	5.2507e-05	92.468	1	106.098	2.49487e-80	245.03	1	111.069	8.79854e-110	267.21	1	119.177	2.0427e-167	297.5									1	120.347	4.76814e-189	300.55	1	91.2233	3.89912e-68	242.48	1	134.655	7.84263e-167	294.81	N	RGERKVCRFKLEWLGNCSGLNDETYGYKEGK	X;X;X;X;X;X;X;X;X;X;X;X;X;X;X;Deamidation 18O (N);X;X;X;X;X;X;X;X;X;X;X;X;X;X;X
516	A3KMG0	MATN1 protein (Fragment)	MATN1	A3KMG0	1	251.837	2.46718e-81	251.84	235.36	251.84	1	251.837	2.46718e-81	251.84	1	203.317	1.86614e-30	203.32	1	251.837	2.46718e-81	251.84																									N	KVFLSQVIESLDVGPNATRVGMVNYASTVKQ	X;X;X;X;X;X;X;X;X;X;X;X;X;X;X;Deamidation 18O (N);X;X;X;X;X;X;X;X;X;X;X;X;X;X;X
517	Q53GD2	Fibrinogen-like 2 variant (Fragment)		Q53GD2	1	138.396	0.00194293	138.4	93.949	138.4													1	109.714	0.0116651	109.71	1	87.3076	0.0222524	87.308	1	112.842	0.00604798	112.84	1	98.0331	0.0167805	98.033	1	126.412	0.00194293	126.41	1	138.396	0.00222368	138.4	N	GGGWTVLQARLDGSTNFTRTWQDYKAGFGNL	X;X;X;X;X;X;X;X;X;X;X;X;X;X;X;Deamidation 18O (N);X;X;X;X;X;X;X;X;X;X;X;X;X;X;X
518	Q53GD2	Fibrinogen-like 2 variant (Fragment)		Q53GD2	0.999614	34.1325	0.000588293	106.55	97.013	106.55					0.999442	32.5287	0.000588293	97.203					0.998788	29.1589	0.00132221	97.203	0.999614	34.1325	0.000716647	106.55	0.99948	32.8351	0.000756162	105.99									0.968177	14.8322	0.0148382	62.377	N	VANEFLKYRLHVGNYNGTAGDALRFNKHYNH	X;X;X;X;X;X;X;X;X;X;X;X;X;X;X;Deamidation 18O (N);X;X;X;X;X;X;X;X;X;X;X;X;X;X;X
519	A4D213	DKFZP586J0619 protein	DKFZP586J0619 tcag7.531	A4D213	1	82.4167	0.010593	82.417	50.986	82.417																													1	82.4167	0.010593	82.417					N	FITLLADTSDSRALENRGADASMACRKLAVA	X;X;X;X;X;X;X;X;X;X;X;X;X;X;X;Deamidation 18O (N);X;X;X;X;X;X;X;X;X;X;X;X;X;X;X
520	A4QPA1	PTGFRN protein (Fragment)	PTGFRN	A4QPA1	1	164.335	1.01899e-30	164.33	93.112	164.33																																	1	164.335	1.01899e-30	164.33	N	KNVSVAEGKELDLTCNITTDRADDVRPEVTW	X;Deamidation 18O (N);X;X;X;X;X;X;X;X;X;X;X;X;X;Deamidation 18O (N);X;X;X;X;X;X;X;X;X;X;X;X;X;X;X
521	A4QPA1	PTGFRN protein (Fragment)	PTGFRN	A4QPA1	1	109.439	0.00205298	166.07	123.96	109.44	1	85.7306	0.026012	85.731	1	92.0512	0.0288715	92.051					1	166.066	0.0038627	166.07									1	123.86	0.00205298	123.86	1	158.756	0.00350234	158.76	1	109.439	0.0119421	109.44	N	KYIISLDQDSVVKLENWTDASRVDGVVLEKV	X;X;X;X;X;X;X;X;X;X;X;X;X;X;X;Deamidation 18O (N);X;X;X;X;X;X;X;X;X;X;X;X;X;X;X
522	A4QPA1	PTGFRN protein (Fragment)	PTGFRN	A4QPA1	1	87.1812	0.0243078	87.181	55.246	87.181																									1	87.1812	0.0243078	87.181									N	TVVIQPTVLRAAVPKNVSVAEGKELDLTCNI	X;X;X;X;X;X;X;X;X;X;X;X;X;X;X;Deamidation 18O (N);X;X;X;X;X;X;X;X;X;X;X;X;X;Deamidation 18O (N);X
523	A5D8U1	Matrilin 4	MATN4	A5D8U1	1	227.305	5.30716e-90	227.3	223.96	227.3																	1	115.555	6.6574e-10	115.55	1	172.907	3.51494e-51	172.91	1	82.8495	0.000225196	82.849	1	227.305	5.30716e-90	227.3					N	QFQSRLCAIDYCSFGNHSCQHECVSTPGGPR	X;X;X;X;X;X;X;X;X;X;X;X;X;X;X;Deamidation 18O (N);X;X;X;X;X;X;X;X;X;X;X;X;X;X;X
524	H7C0M6	Sialoadhesin (Fragment)	SIGLEC1	H7C0M6	1	99.752	2.21833e-40	229.29	162.86	99.752													1	229.293	2.21833e-40	229.29					1	99.752	0.0307169	99.752													N	EGFYSCSARSPLGQANTSLELRLEGVRVILA	X;X;X;X;X;X;X;X;X;X;X;X;X;X;X;Deamidation 18O (N);X;X;X;X;X;X;X;X;X;X;X;X;X;X;X
525	H7C0M6	Sialoadhesin (Fragment)	SIGLEC1	H7C0M6	1	138.767	2.09157e-14	138.77	124.21	138.77													1	138.767	2.09157e-14	138.77																					N	VVAEPGLDVPEGAALNLSCRLLGGPGPVGNS	X;X;X;X;X;X;X;X;X;X;X;X;X;X;X;Deamidation 18O (N);X;X;X;X;X;X;X;X;X;X;X;X;X;X;X
526	B3KTA8	cDNA FLJ37971 fis, clone CTONG2009958, highly similar to CERULOPLASMIN		B3KTA8	1	64.0638	2.07588e-94	229.02	206.21	192.24	0.999999	59.6615	2.07588e-94	198.51	0.999996	54.422	3.23084e-25	189.45	0.999984	48.0814	1.1801e-20	169.4	1	64.0638	2.11561e-25	192.24					0.999994	51.976	2.08223e-55	229.02	0.999997	54.8442	6.64483e-42	204.81	0.999723	35.5665	3.73989e-08	130.64	0.999999	60.8801	3.31659e-30	200.9	N	PQREWEKELHHLQEQNVSNAFLDKGEFYIGS	X;X;X;X;X;X;X;X;X;X;X;X;X;X;X;Deamidation 18O (N);X;X;X;X;X;X;X;X;X;X;X;X;X;X;X
527	B3KTA8	cDNA FLJ37971 fis, clone CTONG2009958, highly similar to CERULOPLASMIN		B3KTA8	1	91.9687	3.27536e-225	309.29	286.05	91.969	1	203.114	1.94334e-39	203.11	1	134.14	4.68212e-14	134.14	1	190.435	4.86892e-34	190.44	1	287.416	2.50345e-157	287.42	1	112.173	3.10078e-05	112.17	1	118.201	6.47072e-08	118.2	1	309.291	3.27536e-225	309.29					1	91.9687	2.71697e-07	91.969	N	IWNYAPSGIDIFTKENLTAPGSDSAVFFEQG	X;X;X;X;X;X;X;X;X;X;X;X;X;X;X;Deamidation 18O (N);X;X;X;X;X;X;X;X;X;X;X;X;X;X;X
528	Q59F71	Metalloendopeptidase (EC 3.4.24.-) (Fragment)		Q59F71	1	163.877	6.68326e-06	163.88	127.54	163.88	1	152.973	6.68326e-06	152.97	1	152.973	6.68326e-06	152.97	1	112.748	0.00208661	112.75	1	163.877	1.38262e-05	163.88																					N	CVWRISVTPGEKIILNFTSLDLYRSRLCWYD	X;X;X;X;X;X;X;X;X;X;X;X;X;X;X;Deamidation 18O (N);X;X;X;X;X;X;X;X;X;X;X;X;X;X;X
529	K7EMC3	Apolipoprotein C-IV	APOC4	K7EMC3	1	93.4285	0.0192823	93.429	55.106	93.429													1	93.4285	0.0192823	93.429																					N	SLVRGRMKELLETVVNRTRDGWQWFW_____	X;X;X;X;X;X;X;X;X;X;X;X;X;X;X;Deamidation 18O (N);X;X;X;X;X;X;X;X;X;X;X;X;X;X;X
530	L7RXH0	Integrin, alpha V	ITGAV	L7RXH0	1	84.1687	2.18319e-14	156.69	144.11	84.169	1	73.4663	0.00900852	73.466	1	77.1846	0.00487135	77.185	1	128.675	6.09641e-06	128.68	1	156.004	2.18319e-14	156	1	156.688	2.27595e-14	156.69	1	122.423	2.44765e-05	122.42	1	116.238	6.91968e-05	116.24	1	113.649	0.000172632	113.65	1	84.1687	0.0023243	84.169	N	SASSRMFLLVGAPKANTTQPGIVEGGQVLKC	X;X;X;X;X;X;X;X;X;X;X;X;X;X;X;Deamidation 18O (N);X;X;X;X;X;X;X;X;X;X;X;X;X;X;X
531	L7RXH0	Integrin, alpha V	ITGAV	L7RXH0	1	73.5749	4.41745e-10	203.02	154.27	201.84													0.999997	55.0773	4.41745e-10	203.02									0.888192	9.00033	0.0327624	50.284	0.998315	27.7269	0.0169432	69.01	1	73.5749	5.829e-10	201.84	N	KSLLWTETFMNKENQNHSYSLKSSASFNVIE	X;X;X;X;X;X;X;X;X;X;X;X;X;X;X;Deamidation 18O (N);X;X;X;X;X;X;X;X;X;X;X;X;X;X;X
532	L7RXH0	Integrin, alpha V	ITGAV	L7RXH0	1	221.47	3.06243e-80	243.41	201.02	221.47	1	110.735	3.16668e-05	110.74	1	115.816	5.73279e-39	200.39	1	183.562	1.32462e-30	183.56	1	154.47	3.06243e-80	243.41	1	73.809	0.00121994	73.809	1	101.923	0.000610746	101.92	1	201.12	5.06888e-39	201.12	1	238.187	4.11766e-77	238.19	1	221.47	1.11344e-54	221.47	N	NPLRIKISSLQTTEKNDTVAGQGERDHLITK	X;X;X;X;X;X;X;X;X;X;X;X;X;X;X;Deamidation 18O (N);X;X;X;X;X;X;X;X;X;X;X;X;X;X;X
533	L7RXH0	Integrin, alpha V	ITGAV	L7RXH0	1	118.011	0.0130345	118.01	69.769	118.01									1	89.7035	0.030721	89.703																					1	118.011	0.0130345	118.01	N	RRALFLYSRSPSHSKNMTISRGGLMQCEELI	X;X;X;X;X;X;X;X;X;X;X;X;X;X;X;Deamidation 18O (N);X;X;X;X;X;X;X;X;X;X;X;X;X;X;X
534	L7RXH0	Integrin, alpha V	ITGAV	L7RXH0	1	65.4454	0	326.56	306.96	285.65	0.999996	54.5568	0	280.4									0.99991	40.4743	1.78832e-293	326.56	0.999746	35.9446	4.72788e-169	232.28					0.999999	60.1005	0	281.07	1	65.4454	1.31633e-169	285.65					N	DTTGLQPILNQFTPANISRQAHILLDCGEDN	X;X;X;X;X;X;X;X;X;X;X;X;X;X;X;Deamidation 18O (N);X;X;X;X;X;X;X;X;X;X;X;X;X;X;X
535	A6NCT7	Collagen alpha-1(XVI) chain	COL16A1	A6NCT7	1	84.6583	0.00959242	84.658	66.75	84.658													1	84.6583	0.00959242	84.658																					N	AADECPPCVHGARDSNVTLAPSGPKGGKGER	X;X;X;X;X;X;X;X;X;X;X;X;X;X;X;Deamidation 18O (N);X;X;X;X;X;X;X;X;X;X;X;X;X;X;X
536	A6NCT7	Collagen alpha-1(XVI) chain	COL16A1	A6NCT7	1	123.591	5.56076e-91	250.47	226.83	227.46	0.999999	58.696	8.09793e-12	130.39	1	113.018	5.56076e-91	250.47	0.999998	57.0371	1.4635e-14	139.04	1	83.9886	2.56768e-34	192.55	0.999794	36.8555	0.000347124	100.77	1	86.8345	3.79837e-15	141.6	1	63.6791	7.51042e-19	145.69	1	100.276	1.20829e-54	216.34	1	123.591	3.76069e-65	227.46	N	QQEGLKLEHSSSLPANVTGFNLIHRLSLMKT	X;X;X;X;X;X;X;X;X;X;X;X;X;X;X;Deamidation 18O (N);X;X;X;X;X;X;X;X;X;X;X;X;X;X;X
537	Q9P255	Zinc finger protein 492 (Zinc finger protein 115)	ZNF492 KIAA1473 ZNF115	Q9P255	1	135.84	2.73963e-14	138.63	81.915	138.63	1	117.172	1.35774e-08	122.33	0.999997	55.1791	0.0236503	55.314	1	127.971	1.34809e-12	133.05	1	135.84	2.73963e-14	138.63					0.999992	51.0763	0.0325191	51.211	1	119.008	1.35774e-08	122.33	1	89.4602	0.00111811	92.247	1	113.997	4.70934e-08	117.79	N	TGEKPYKCEECGKAFNNSSILNRHKMIHTGE	X;X;X;X;X;X;X;X;X;X;X;X;X;X;X;Deamidation 18O (N);Deamidation 18O (N);X;X;X;X;X;X;X;X;X;X;X;X;X;X
538	Q9P255	Zinc finger protein 492 (Zinc finger protein 115)	ZNF492 KIAA1473 ZNF115	Q9P255	1	135.84	2.73963e-14	138.63	81.915	138.63	1	117.172	1.35774e-08	122.33	0.999997	55.1791	0.0236503	55.314	1	127.971	1.34809e-12	133.05	1	135.84	2.73963e-14	138.63					0.999992	51.0763	0.0325191	51.211	1	119.008	1.35774e-08	122.33	1	89.4602	0.00111811	92.247	1	113.997	4.70934e-08	117.79	N	GEKPYKCEECGKAFNNSSILNRHKMIHTGEK	X;X;X;X;X;X;X;X;X;X;X;X;X;X;Deamidation 18O (N);Deamidation 18O (N);X;X;X;X;X;X;X;X;X;X;X;X;X;X;X
539	A6NLG9	Biglycan		A6NLG9	1	67.9304	9.09095e-154	265.53	213.37	67.93	1	67.9304	9.09095e-154	265.53	0.797481	5.95255	1.7714e-23	211.26	0.666427	3.00561	2.56789e-05	128.22	0.929208	11.1813	2.07306e-70	196.57	0.685467	3.38321	1.61743e-23	211.67	0.715575	4.00687	4.06428e-25	184.1	0.791281	5.78768	2.40051e-93	263.74	0.658041	2.84279	3.34804e-09	142.45	0.657154	2.82568	2.37959e-07	136.51	N	GLPDLKLLQVVYLHSNNITKVGVNDFCPMGF	X;X;X;X;X;X;X;X;X;X;X;X;X;X;X;Deamidation 18O (N);Deamidation 18O (N);X;X;X;X;X;X;X;X;X;X;X;X;X;X
540	A6NLG9	Biglycan		A6NLG9	1	67.9304	9.09095e-154	297.18	238.11	67.93	1	67.9304	9.09095e-154	265.53	0.849028	7.50025	2.20146e-05	128.96	0.790882	5.7772	2.0093e-148	297.18	0.896134	9.359	7.19849e-110	271.6	0.90402	9.73997	4.72429e-25	215.77	0.83473	7.03352	2.04398e-79	260.83	0.927277	11.0554	2.91928e-23	208.27	0.989274	19.6486	3.07983e-110	276.47	0.932388	11.3957	8.31095e-44	174.9	N	LPDLKLLQVVYLHSNNITKVGVNDFCPMGFG	X;X;X;X;X;X;X;X;X;X;X;X;X;X;Deamidation 18O (N);Deamidation 18O (N);X;X;X;X;X;X;X;X;X;X;X;X;X;X;X
541	A6NLG9	Biglycan		A6NLG9	1	178.15	1.50587e-199	290.66	253.96	178.15	1	87.363	6.31165e-110	272.65	1	91.8546	1.62764e-52	240.6	1	112.506	2.69074e-133	277.06	1	160.685	1.66127e-110	278.38	1	88.1008	1.51883e-83	248.19	1	137.168	7.14226e-128	281.25	1	166.447	1.40068e-147	290.66	1	141.581	1.50587e-199	287.45	1	178.15	1.11221e-154	274.84	N	LYRLGLGHNQIRMIENGSLSFLPTLRELHLD	X;X;X;X;X;X;X;X;X;X;X;X;Oxidation (M);X;X;Deamidation 18O (N);X;X;X;X;X;X;X;X;X;X;X;X;X;X;X
542	A6NMZ7	Collagen alpha-6(VI) chain	COL6A6	A6NMZ7	1	113.499	0.00975159	113.5	61.712	113.5																													1	113.499	0.00975159	113.5					N	REEHIRVYAIGIKEANQTQLREIAGEEKRVY	X;X;X;X;X;X;X;X;X;X;X;X;X;X;X;Deamidation 18O (N);X;X;X;X;X;X;X;X;X;X;X;X;X;X;X
543	A6XAA7	Gremlin	GREM1 hCG_1811964	A6XAA7	1	188.578	0	363.37	350.95	188.58					1	331.419	2.60679e-267	331.42	1	363.368	0	363.37	1	249.297	1.08615e-80	249.3									1	168.64	5.01825e-21	168.64	1	209.254	3.84562e-37	209.25	1	188.578	1.51493e-25	188.58	N	KGSQGAIPPPDKAQHNDSEQTQSPQQPGSRN	X;X;X;X;X;X;X;X;X;X;X;X;X;X;X;Deamidation 18O (N);X;X;X;X;X;X;X;X;X;X;X;X;X;X;X
544	B3KWK7	Insulin-like growth factor binding protein 3, isoform CRA_b (Insulin-like growth factor-binding protein 3) (cDNA FLJ43234 fis, clone HCHON2002964, highly similar to Insulin-like growth factor-binding protein 3)	IGFBP3 hCG_1735376	B3KWK7	1	137.796	2.63517e-14	137.8	122.41	137.8																													1	137.796	2.63517e-14	137.8					N	SRLRAYLLPAPPAPGNASESEEDRSAGSVES	X;X;X;X;X;X;X;X;X;X;X;X;X;X;X;Deamidation 18O (N);X;X;X;X;X;X;X;X;X;X;X;X;X;X;X
545	B3KWK7	Insulin-like growth factor binding protein 3, isoform CRA_b (Insulin-like growth factor-binding protein 3) (cDNA FLJ43234 fis, clone HCHON2002964, highly similar to Insulin-like growth factor-binding protein 3)	IGFBP3 hCG_1735376	B3KWK7	1	117.312	0.000881606	117.31	63.537	117.31													1	117.312	0.000881606	117.31																					N	ARPLQALLDGRGLCVNASAVSRLRAYLLPAP	X;X;X;X;X;X;X;X;X;X;X;X;X;X;X;Deamidation 18O (N);X;X;X;X;X;X;X;X;X;X;X;X;X;X;X
546	A8K369	cDNA FLJ76707, highly similar to Homo sapiens transmembrane protein 87A, mRNA		A8K369	1	156.917	0.000991393	156.92	96.327	156.92													1	116.521	0.00118205	116.52	1	82.645	0.0230412	82.645	1	81.525	0.0186617	81.525	1	88.3637	0.0143657	88.364	1	147.508	0.00095099	147.51	1	156.917	0.000991393	156.92	N	RGLSGKYQTSSKLFQNCSELFKTQTFSGDFM	X;X;X;X;X;X;X;X;X;X;X;X;X;X;X;Deamidation 18O (N);X;X;X;X;X;X;X;X;X;X;X;X;X;X;X
547	A8K0R3	Osteoglycin (Osteoinductive factor, mimecan), isoform CRA_a (cDNA FLJ78199, highly similar to Homo sapiens osteoglycin (osteoinductive factor, mimecan) (OGN), transcript variant 3, mRNA) (cDNA PSEC0219 fis, clone HEMBA1005229, highly similar to Mimecan)	OGN hCG_31130	A8K0R3	1	83.4175	8.71929e-66	261.03	204.6	83.418	1	119.274	0.00618395	126.62	1	119.406	0.00407522	130.27	1	159.039	0.00572173	159.04	1	62.3026	0.00572173	163.77	1	54.5979	0.00528762	157.58	1	52.0089	0.00419516	172.14	1	156.004	8.71929e-66	261.03	1	115.384	4.35502e-13	182.53	1	83.4175	1.07585e-41	242.92	N	FNNIASITDDTFCKANDTSYIRDRIEEIRLE	X;Deamidation 18O (N);Deamidation 18O (N);X;X;X;X;X;X;X;X;X;X;X;X;Deamidation 18O (N);X;X;X;X;X;X;X;X;X;X;X;X;X;X;X
548	A8K0R3	Osteoglycin (Osteoinductive factor, mimecan), isoform CRA_a (cDNA FLJ78199, highly similar to Homo sapiens osteoglycin (osteoinductive factor, mimecan) (OGN), transcript variant 3, mRNA) (cDNA PSEC0219 fis, clone HEMBA1005229, highly similar to Mimecan)	OGN hCG_31130	A8K0R3	0.999999	62.0502	2.80953e-102	237.31	211.44	149.34					0.862188	7.20927	0.0116109	45.596													0.5	0	2.80953e-102	237.31	0.999891	39.6148	4.94197e-13	106.67	0.486859	0.352201	0.00129769	65.423	0.999999	62.0502	1.68538e-48	163.16	N	KIKSRGIKANAFKKLNNLTFLYLDHNALESV	X;X;X;X;X;X;X;X;X;X;X;X;X;X;X;Deamidation 18O (N);Deamidation 18O (N);X;X;X;X;X;X;X;X;X;X;X;X;X;X
549	A8K0R3	Osteoglycin (Osteoinductive factor, mimecan), isoform CRA_a (cDNA FLJ78199, highly similar to Homo sapiens osteoglycin (osteoinductive factor, mimecan) (OGN), transcript variant 3, mRNA) (cDNA PSEC0219 fis, clone HEMBA1005229, highly similar to Mimecan)	OGN hCG_31130	A8K0R3	0.999968	44.9	1.12998e-280	319.32	286.8	149.34					0.990629	20.241	1.12998e-280	319.32	0.999488	32.9013	1.56024e-102	235.7	0.990631	20.2424	3.8176e-54	187.51	0.978182	16.516	3.33014e-79	220.5	0.992255	21.0762	2.80953e-102	237.31	0.999486	32.8889	9.79619e-116	244.21	0.991025	20.4498	1.33045e-78	217.05	0.999968	44.9	3.57372e-254	314.1	N	IKSRGIKANAFKKLNNLTFLYLDHNALESVP	X;X;X;X;X;X;X;X;X;X;X;X;X;X;Deamidation 18O (N);Deamidation 18O (N);X;X;X;X;X;X;X;X;Deamidation 18O (N);X;X;X;X;X;X
550	A8K0R3	Osteoglycin (Osteoinductive factor, mimecan), isoform CRA_a (cDNA FLJ78199, highly similar to Homo sapiens osteoglycin (osteoinductive factor, mimecan) (OGN), transcript variant 3, mRNA) (cDNA PSEC0219 fis, clone HEMBA1005229, highly similar to Mimecan)	OGN hCG_31130	A8K0R3	0.999962	43.6769	6.162e-17	97.542	86.121	97.542									0.999962	43.6769	6.162e-17	97.542																	0.997652	25.4102	1.85456e-08	86.519					N	AFKKLNNLTFLYLDHNALESVPLNLPESLRV	X;X;X;X;X;X;Deamidation 18O (N);X;X;X;X;X;X;X;X;Deamidation 18O (N);X;X;X;X;X;X;X;X;X;X;X;X;X;X;X
551	A8K0R3	Osteoglycin (Osteoinductive factor, mimecan), isoform CRA_a (cDNA FLJ78199, highly similar to Homo sapiens osteoglycin (osteoinductive factor, mimecan) (OGN), transcript variant 3, mRNA) (cDNA PSEC0219 fis, clone HEMBA1005229, highly similar to Mimecan)	OGN hCG_31130	A8K0R3	1	45.6082	2.936e-05	106.16	99.798	45.608																									0.547078	0.820254	0.000675353	91.475	1	45.6082	2.936e-05	106.16	0.535558	0.618743	0.0162928	52.185	N	PLNLPESLRVIHLQFNNIASITDDTFCKAND	X;X;X;X;X;X;X;X;X;X;X;X;X;X;X;Deamidation 18O (N);Deamidation 18O (N);X;X;X;X;X;X;X;X;X;X;X;X;Deamidation 18O (N);X
552	A8K0R3	Osteoglycin (Osteoinductive factor, mimecan), isoform CRA_a (cDNA FLJ78199, highly similar to Homo sapiens osteoglycin (osteoinductive factor, mimecan) (OGN), transcript variant 3, mRNA) (cDNA PSEC0219 fis, clone HEMBA1005229, highly similar to Mimecan)	OGN hCG_31130	A8K0R3	1	45.6082	3.30968e-11	117.67	111.21	45.608																	0.907571	9.9207	2.8541e-08	117.67	0.979997	16.9013	3.30968e-11	114.96					1	45.6082	0.0279486	45.608	0.858653	7.83531	3.02174e-05	105.9	N	LNLPESLRVIHLQFNNIASITDDTFCKANDT	X;X;X;X;X;X;X;X;X;X;X;X;X;X;Deamidation 18O (N);Deamidation 18O (N);X;X;X;X;X;X;X;X;X;X;X;X;Deamidation 18O (N);X;X
553	A8K2T4	Complement component C7	C7	A8K2T4	1	114.186	0.0208764	114.19	77.629	114.19																													1	114.186	0.0208764	114.19					N	PLTVCKMHVLHCQGRNYTLTGRDSCTLPASA	X;X;X;X;X;X;X;X;X;X;X;X;X;X;X;Deamidation 18O (N);X;X;X;X;X;X;X;X;X;X;X;X;X;X;X
554	F5H1C0	Microfibrillar-associated protein 5 (Fragment)	MFAP5	F5H1C0	1	95.5231	0.000563527	121.73	115.06	95.523													1	121.733	0.000563527	121.73									1	101.646	0.00609218	101.65	1	108.147	0.00493472	108.15	1	95.5231	0.00792968	95.523	N	DIAPSTDDLASLSEKNTTAECWDEKFTC___	X;X;X;X;X;X;X;X;X;X;X;X;X;X;X;Deamidation 18O (N);X;X;X;X;X;X;X;X;X;X;X;X;X;X;X
555	Q14CE1	GPR64 protein	GPR64	Q14CE1	0.999093	30.4201	5.18374e-05	101.47	94.196	101.47																													0.988881	19.4907	0.00225574	62.582	0.999093	30.4201	5.18374e-05	101.47	N	QYDKESTVPQNQHITNGTLTGVLSLSELKRS	X;X;X;X;X;X;X;X;X;X;X;X;X;X;X;Deamidation 18O (N);X;X;X;X;X;X;X;X;X;X;X;X;X;X;X
556	B7Z4A4	cDNA FLJ53058, highly similar to Legumain		B7Z4A4	1	89.5479	6.45543e-46	238.51	178.71	89.548													1	238.511	6.45543e-46	238.51													1	89.5479	1.06191e-25	218.71					N	GILVFPNEDLHVKDLNETIHYMYKHKMYRKM	X;X;X;X;X;X;X;X;X;X;X;X;X;X;X;Deamidation 18O (N);X;X;X;X;X;X;X;X;X;X;X;X;X;X;X
557	B7Z4A4	cDNA FLJ53058, highly similar to Legumain		B7Z4A4	1	171.255	1.80848e-09	171.26	152.66	171.26													1	112.634	0.000614258	112.63	1	75.5888	0.00589763	75.589	1	65.2124	1.08786e-07	140.27	1	126.77	4.00214e-05	126.77	1	171.255	1.80848e-09	171.26	1	122.327	0.000104494	122.33	N	KETLHKQYHLVKSHTNTSHVMQYGNKTISTM	X;X;X;X;X;X;X;X;X;X;X;X;X;X;X;Deamidation 18O (N);X;X;X;X;Oxidation (M);X;X;X;Deamidation 18O (N);X;X;X;X;X;X
558	B7Z4A4	cDNA FLJ53058, highly similar to Legumain		B7Z4A4	1	171.255	1.80848e-09	171.26	152.66	171.26													1	112.634	0.000614258	112.63	1	75.5888	0.00589763	75.589	1	65.2124	1.08786e-07	140.27	1	126.77	4.00214e-05	126.77	1	171.255	1.80848e-09	171.26	1	122.327	0.000104494	122.33	N	LVKSHTNTSHVMQYGNKTISTMKVMQFQGMK	X;X;X;X;X;X;Deamidation 18O (N);X;X;X;X;Oxidation (M);X;X;X;Deamidation 18O (N);X;X;X;X;X;X;X;X;X;X;X;X;X;X;X
559	B4E0K9	Alpha-mannosidase (EC 3.2.1.-)		B4E0K9	1	127.78	1.74992e-14	148.52	95.282	148.52													1	127.78	1.74992e-14	148.52																					N	EILERRRDYRPTWKLNQTEPVAGNYYPVNTR	X;X;X;X;X;X;X;X;X;X;X;X;X;X;X;Deamidation 18O (N);X;X;X;X;X;X;X;X;X;X;X;X;X;X;X
560	Q5JRP2	Disintegrin and metalloproteinase domain-containing protein 12 (Fragment)	ADAM12	Q5JRP2	1	79.8202	0.00159861	79.82	57.287	79.82													1	79.8202	0.00159861	79.82																					N	SLSTCSGLRGLIVFENESYVLEPMKSATNRY	X;X;X;X;X;X;X;X;X;X;X;X;X;X;X;Deamidation 18O (N);X;X;X;X;X;X;X;X;X;X;X;X;X;X;X
561	B4DK26	cDNA FLJ61301, highly similar to CD276 antigen		B4DK26	1	170.163	3.28287e-65	228.32	209.9	170.16													1	228.318	3.28287e-65	228.32	1	204.903	7.33674e-40	204.9	1	201.043	2.29581e-39	201.04	1	170.163	1.37108e-60	170.16	1	98.9334	0.0161748	98.933					N	VHSFAEGQDQGSAYANRTALFPDLLAQGNAS	X;X;X;X;X;X;X;X;X;X;X;X;X;X;X;Deamidation 18O (N);X;X;X;X;X;X;X;X;X;X;X;X;Deamidation 18O (N);X;X
562	B4DK26	cDNA FLJ61301, highly similar to CD276 antigen		B4DK26	1	198.318	2.11036e-29	210.31	184.89	198.32													1	210.311	2.11036e-29	210.31	1	98.5308	0.00226948	98.531	1	154.672	2.00266e-14	154.67	1	183.375	1.51764e-15	183.37	1	162.32	3.03184e-14	162.32	1	198.318	7.89129e-23	198.32	N	YANRTALFPDLLAQGNASLRLQRVRVADEGS	X;X;Deamidation 18O (N);X;X;X;X;X;X;X;X;X;X;X;X;Deamidation 18O (N);X;X;X;X;X;X;X;X;X;X;X;X;X;X;X
563	B4DK26	cDNA FLJ61301, highly similar to CD276 antigen		B4DK26	1	172.804	1.25933e-43	172.8	130.8	172.8													1	103.181	0.00174803	103.18	1	158.79	1.71647e-24	158.79					1	158.94	1.57622e-24	158.94	1	98.7542	6.93701e-33	160.91	1	172.804	1.25933e-43	172.8	N	GLFDVHSILRVVLGANGTYSCLVRNPVLQQD	X;X;X;X;X;X;X;X;X;X;X;X;X;X;X;Deamidation 18O (N);X;X;X;X;X;X;X;X;X;X;X;X;X;X;X
564	G3V0E5	Transferrin receptor (P90, CD71), isoform CRA_c (Transferrin receptor protein 1)	TFRC hCG_22086	G3V0E5	1	123.639	5.54064e-30	202.44	179.56	123.64													1	202.442	5.54064e-30	202.44									1	137.396	5.27439e-10	137.4	1	186.167	2.79323e-22	186.17	1	123.639	5.59791e-07	123.64	N	NFGTKKDFEDLYTPVNGSIVIVRAGKITFAE	X;X;X;X;X;X;X;X;X;X;X;X;X;X;X;Deamidation 18O (N);X;X;X;X;X;X;X;X;X;X;X;X;X;X;X
565	D3DVN8	Iduronidase, alpha-L-, isoform CRA_a	IDUA hCG_34451	D3DVN8	0.986681	18.6969	0.00133388	95.651	78.144	73.91	0.904727	9.77546	0.0360337	45.434									0.977456	16.3706	0.00151461	83.729	0.986681	18.6969	0.00438858	73.91	0.896147	9.35961	0.00133388	95.651													N	PHPFAQRTLTARFQVNNTRPPHVQLLRKPVL	X;X;X;X;X;X;X;X;X;X;X;X;X;X;X;Deamidation 18O (N);X;X;X;X;X;X;X;X;X;X;X;X;X;X;X
566	E9PNW2	Transmembrane 9 superfamily member (Fragment)	TM9SF1	E9PNW2	1	81.5478	0.0251311	81.548	33.044	81.548													1	80.4381	0.0251311	80.438									1	81.5478	0.0345474	81.548									N	LDFHLEFHGDRIIFANVSVRDVKPHSLDGLR	X;X;X;X;X;X;X;X;X;X;X;X;X;X;X;Deamidation 18O (N);X;X;X;X;X;X;X;X;X;X;X;X;X;X;X
567	A8K8F6	cDNA FLJ78417, highly similar to Homo sapiens low density lipoprotein receptor-related protein associated protein 1 (LRPAP1), mRNA		A8K8F6	1	194.697	1.38467e-85	253.88	201.19	194.7	1	194.241	1.28762e-18	194.24									1	253.882	1.38467e-85	253.88									1	232.416	5.11534e-48	232.42	1	235.312	5.10873e-59	235.31	1	194.697	1.10969e-18	194.7	N	EEPRVIDLWDLAQSANLTDKELEAFREELKH	X;X;X;X;X;X;X;X;X;X;X;X;X;X;X;Deamidation 18O (N);X;X;X;X;X;X;X;X;X;X;X;X;X;X;X
568	A8K8T0	cDNA FLJ78760, highly similar to Homo sapiens integrin, alpha 11 (ITGA11), transcript variant 1, mRNA		A8K8T0	0.948092	12.6161	3.36993e-19	148.97	127.29	148.97													0.948092	12.6161	3.36993e-19	148.97																					N	RPTPVEEDLRRAPQLNHSNSDVVSINCNIRL	X;X;X;X;X;X;X;X;X;X;X;X;X;X;X;Deamidation 18O (N);X;X;X;X;X;X;X;X;X;X;X;X;X;X;X
569	A8K8T0	cDNA FLJ78760, highly similar to Homo sapiens integrin, alpha 11 (ITGA11), transcript variant 1, mRNA		A8K8T0	0.981979	17.1607	8.02779e-28	109.97	88.508	58.722																													0.981979	17.1607	8.02779e-28	109.97					N	GNRLLKLRDFLTDEANTSCNIWGNSTEYRPT	X;X;X;X;X;X;X;X;X;X;X;X;X;X;X;Deamidation 18O (N);X;X;X;X;X;X;X;Deamidation 18O (N);X;X;X;X;X;X;X
570	A8K8T0	cDNA FLJ78760, highly similar to Homo sapiens integrin, alpha 11 (ITGA11), transcript variant 1, mRNA		A8K8T0	0.999792	36.8304	7.61963e-66	178.33	162.56	178.33													0.999792	36.8304	7.61963e-66	178.33													0.999019	29.8377	8.02779e-28	109.97					N	DFLTDEANTSCNIWGNSTEYRPTPVEEDLRR	X;X;X;X;X;X;X;Deamidation 18O (N);X;X;X;X;X;X;X;Deamidation 18O (N);X;X;X;X;X;X;X;X;X;X;X;X;X;X;X
571	A8K8T0	cDNA FLJ78760, highly similar to Homo sapiens integrin, alpha 11 (ITGA11), transcript variant 1, mRNA		A8K8T0	1	180.88	2.68252e-53	180.88	130.27	180.88													1	180.88	2.68252e-53	180.88																					N	EIKYIASDPDDKHFFNVTDEAALKDIVDALG	X;X;X;X;X;X;X;X;X;X;X;X;X;X;X;Deamidation 18O (N);X;X;X;X;X;X;X;X;X;X;X;X;X;X;X
572	A8K8T0	cDNA FLJ78760, highly similar to Homo sapiens integrin, alpha 11 (ITGA11), transcript variant 1, mRNA		A8K8T0	1	131.031	0.000138755	139.88	111.37	131.03													1	139.878	0.00330994	139.88									1	128.607	0.0043431	128.61	1	131.031	0.000138755	131.03					N	FLAPHFQTTTVGIRYNATMDERRYTPRAHLD	X;X;X;X;X;X;X;X;X;X;X;X;X;X;X;Deamidation 18O (N);X;X;X;X;X;X;X;X;X;X;X;X;X;X;X
573	E9PBC5	Plasma kallikrein	KLKB1	E9PBC5	0.999985	48.3786	0.0100526	113.14	52.488	113.14													0.999985	48.3786	0.0100526	113.14																					N	HRDIYKGVDMRGVNFNVSKVSSVEECQKRCT	X;X;X;X;X;X;X;X;X;X;X;X;X;X;X;Deamidation 18O (N);X;X;X;X;X;X;X;X;X;X;X;X;X;X;X
574	E9PBC5	Plasma kallikrein	KLKB1	E9PBC5	1	132.857	1.19149e-24	145.81	112.73	132.86													1	145.815	1.19149e-24	145.81									1	124.515	1.72369e-12	124.51	1	124.302	1.37617e-14	145.81	1	132.857	6.66018e-09	132.86	N	HSKIYPGVDFGGEELNVTFVKGVNVCQETCT	X;X;X;X;X;X;X;X;X;X;X;X;X;X;X;Deamidation 18O (N);X;X;X;X;X;X;X;X;X;X;X;X;X;X;X
575	E9PBC5	Plasma kallikrein	KLKB1	E9PBC5	1	190.26	6.71222e-16	190.26	143.06	190.26													1	161.19	1.15714e-08	161.19									1	147.28	6.71222e-16	178.53	1	172.173	1.55005e-08	172.17	1	190.26	4.75027e-12	190.26	N	GLPLQDVWRIYSGILNLSDITKDTPFSQIKE	X;X;X;X;X;X;X;X;X;X;X;X;X;X;X;Deamidation 18O (N);X;X;X;X;X;X;X;X;X;X;X;X;X;X;X
577	Q6AWA9	Uncharacterized protein DKFZp686A03134 (Fragment)	DKFZp686A03134	Q6AWA9	1	342.433	7.12552e-284	342.43	292.23	342.43													1	342.433	7.12552e-284	342.43																					N	SIRYEIFKRGPECSQNYTTPSGVIKSPGFPE	X;X;X;X;X;X;X;X;X;X;X;X;X;X;X;Deamidation 18O (N);X;X;X;X;X;X;X;X;X;X;X;X;X;X;X
578	Q6AWA9	Uncharacterized protein DKFZp686A03134 (Fragment)	DKFZp686A03134	Q6AWA9	0.965414	14.4581	1.50834e-21	182.39	164.96	182.39													0.965414	14.4581	8.36864e-06	182.39													0.959959	13.7975	1.50834e-21	158.57					N	RENKVFMRKFKIGYSNNGSDWKMIMDDSKRK	X;X;X;X;X;X;X;X;X;X;X;X;X;X;X;Deamidation 18O (N);X;X;X;X;X;X;X;X;X;X;X;X;X;X;X
579	Q9UH97	Hematopoietic progenitor cell antigen CD34 (Fragment)	CD34	Q9UH97	1	140.446	4.69871e-09	140.45	81.096	140.45													1	75.6522	0.0308043	75.652									1	140.446	4.69871e-09	140.45									N	GIREVKLTQGICLEQNKTSSCAEFKKDRGEG	X;X;X;X;X;X;X;X;X;X;X;X;X;X;X;Deamidation 18O (N);X;X;X;X;X;X;X;X;X;X;X;X;X;X;X
580	B7ZL93	GPR107 protein (Fragment)	GPR107	B7ZL93	0.999732	35.7644	2.83113e-08	103.76	89.33	103.76													0.999732	35.7644	2.83113e-08	103.76																					N	LGQSQEPNVNPASAGNQTQKTQDGGKSKRST	X;X;X;X;X;X;X;X;X;X;X;X;X;X;X;Deamidation 18O (N);X;X;X;X;X;X;X;X;X;X;X;X;X;X;X
581	A8KAM8	Platelet-derived growth factor receptor beta (PDGF-R-beta) (PDGFR-beta) (EC 2.7.10.1) (Beta platelet-derived growth factor receptor) (Beta-type platelet-derived growth factor receptor)		A8KAM8	1	77.7442	2.11718e-06	133.89	95.807	77.744													1	133.893	2.11718e-06	133.89	1	79.693	0.0209019	79.693	1	77.7442	0.024275	77.744													N	NVTESVNDHQDEKAINITVVESGYVRLLGEV	X;X;X;X;X;X;X;X;X;X;X;X;X;X;X;Deamidation 18O (N);X;X;X;X;X;X;X;X;X;X;X;X;X;X;X
582	B4DUJ2	cDNA FLJ54063, highly similar to Homo sapiens CD74 antigen, transcript variant 2, mRNA		B4DUJ2	1	103.388	3.48224e-14	124.2	115.71	124.2													1	103.388	3.48224e-14	124.2																					N	GALPQGPMQNATKYGNMTEDHVMHLLQNADP	X;X;X;X;X;X;X;X;X;X;X;X;X;X;X;Deamidation 18O (N);X;X;X;X;X;X;X;X;X;X;X;X;X;X;X
583	B2R8K9	Aminopeptidase (EC 3.4.11.-)		B2R8K9	1	140.483	5.22045e-30	176.95	176.95	140.48													1	176.948	2.58324e-05	176.95	1	106.003	0.00413215	106	1	94.801	0.00549708	94.801	1	162.005	5.22045e-30	162					1	140.483	3.60941e-05	140.48	N	IYVQPEQKHTAEYAANITKSVFDYFEEYFAM	X;X;X;X;X;X;X;X;X;X;X;X;X;X;X;Deamidation 18O (N);X;X;X;X;X;X;X;X;X;X;X;X;X;X;X
584	B2R8K9	Aminopeptidase (EC 3.4.11.-)		B2R8K9	0.999971	46.0892	1.05618e-07	115.12	106.84	115.12													0.999971	46.0892	1.05618e-07	115.12																					N	VYRYGMQNSGNEISWNYTLEQYQKTSLAQEK	X;X;X;X;X;X;X;X;X;X;X;X;X;X;X;Deamidation 18O (N);X;X;X;X;X;X;X;X;X;X;X;X;X;X;X
585	Q59F32	Myosin VIIA variant (Fragment)		Q59F32	0.5	0	0.0110973	67.952	34.724	67.952																									0.5	0	0.0110973	67.952									N	EGLRKRSKYVVALQDNPNPGEESGFLSFAKG	X;X;X;X;X;X;X;X;X;X;X;X;X;X;X;Deamidation 18O (N);X;X;X;X;X;X;X;X;X;X;X;X;X;X;X
586	Q59F32	Myosin VIIA variant (Fragment)		Q59F32	0.5	0	0.0110973	67.952	34.724	67.952																									0.5	0	0.0110973	67.952									N	LRKRSKYVVALQDNPNPGEESGFLSFAKGDL	X;X;X;X;X;X;X;X;X;X;X;X;X;X;X;X;X;X;X;X;X;X;X;X;X;X;X;X;X;X;X
587	J3QRJ3	Thy-1 membrane glycoprotein	THY1	J3QRJ3	1	249.775	0	339.86	322.14	249.78													1	49.7651	5.24271e-103	238.63	1	78.2358	4.06787e-40	156.88	1	144.759	2.17953e-103	241.42	1	296.965	1.52906e-206	296.97	1	85.376	0	339.86	1	249.775	2.20353e-116	249.78	N	CALHHSGHSPPISSQNVTVLRDKLVKCEGIS	X;X;X;X;X;X;X;X;X;X;X;X;X;X;X;Deamidation 18O (N);X;X;X;X;X;X;X;X;X;X;X;X;X;X;X
588	J3QRJ3	Thy-1 membrane glycoprotein	THY1	J3QRJ3	1	195.919	0	479.73	403.58	195.92													1	321.819	3.57499e-239	321.82	1	130.27	4.24802e-08	130.27	1	124.175	1.26283e-07	124.18	1	109.717	6.98021e-05	109.72	1	53.4532	0	479.73	1	195.919	6.4801e-26	195.92	N	LLTVDQSLRLDCRHENTSSSPIQYEFSLTRE	X;X;X;X;X;X;X;X;X;X;X;X;X;X;X;Deamidation 18O (N);X;X;X;X;X;X;X;X;X;X;X;X;X;X;X
589	B1ALB4	Protein SMG7 (Fragment)	SMG7	B1ALB4	1	85.6701	0.0124075	85.67	44.59	85.67	1	85.6701	0.0124075	85.67																																	N	IRQQRLISIGKWIADNQPRLIQCENEVGKLL	X;X;X;X;X;X;X;X;X;X;X;X;X;X;X;Deamidation 18O (N);X;X;X;X;X;X;X;X;X;X;X;X;X;X;X
590	H0YGE9	Cation-dependent mannose-6-phosphate receptor (Fragment)	M6PR	H0YGE9	1	235.892	7.06856e-101	264.22	187.75	264.22													1	152.679	9.93824e-15	156.57					1	84.6659	0.000213704	85.493	1	235.892	7.06856e-101	264.22	1	73.0158	0.00383395	73.726					N	SDTYIYIFRVCREAGNHTSGAGLVQINKSNG	X;X;X;X;X;X;X;X;X;X;X;X;X;X;X;Deamidation 18O (N);X;X;X;X;X;X;X;X;X;X;X;X;X;X;X
591	Q53QN4	Uncharacterized protein FRZB (Fragment)	FRZB	Q53QN4	1	111.648	0.011286	111.65	71.545	111.65					1	95.3523	0.0211248	95.352	1	91.9001	0.0223905	91.9	1	87.7543	0.0239105	87.754									1	92.1869	0.0222854	92.187	1	86.9535	0.0245426	86.953	1	111.648	0.011286	111.65	N	ACEPVRIPLCKSLPWNMTKMPNHLHHSTQAN	X;X;X;X;X;X;X;X;X;X;X;X;X;X;X;Deamidation 18O (N);X;X;X;X;X;X;X;X;X;X;X;X;X;X;X
592	P08236	Beta-glucuronidase (EC 3.2.1.31) (Beta-G1)	GUSB	P08236	1	109.943	0.0141389	111.28	52.618	109.94					1	111.278	0.0141389	111.28																									1	109.943	0.0286713	109.94	N	KSAAFLLRERYWKIANETRYPHSVAKSQCLE	X;X;X;X;X;X;X;X;X;X;X;X;X;X;X;Deamidation 18O (N);X;X;X;X;X;X;X;X;X;X;X;X;X;X;X
593	P08236	Beta-glucuronidase (EC 3.2.1.31) (Beta-G1)	GUSB	P08236	1	181.624	7.30108e-23	211.64	176.42	181.62	1	127.765	0.000143886	127.76	1	172.694	1.45286e-08	172.69	1	177.063	6.36695e-09	177.06	1	211.642	7.30108e-23	211.64	1	137.976	1.11932e-06	137.98	1	164.425	1.44814e-08	164.43	1	166.549	1.6392e-08	166.55	1	187.418	2.52455e-10	187.42	1	181.624	1.75348e-09	181.62	N	KLEVRLLDAENKVVANGTGTQGQLKVPGVSL	X;X;X;X;X;X;X;X;X;X;X;X;X;X;X;Deamidation 18O (N);X;X;X;X;X;X;X;X;X;X;X;X;X;X;X
594	B7Z9M1	cDNA, FLJ78885, highly similar to Neutral amino acid transporter A		B7Z9M1	1	148.183	5.00232e-11	148.18	138.23	148.18									1	65.4716	0.0100202	65.472									1	44.9254	0.0442453	44.925	1	125.356	2.01799e-05	125.36					1	148.183	5.00232e-11	148.18	N	AAFRTYATDYKVVTQNSSSGNVTHEKIPIGT	X;X;X;X;X;X;X;X;X;X;X;X;X;X;X;Deamidation 18O (N);X;X;X;X;Deamidation 18O (N);X;X;X;X;X;X;X;X;X;X
595	B7Z9M1	cDNA, FLJ78885, highly similar to Neutral amino acid transporter A		B7Z9M1	1	148.183	5.00232e-11	148.18	138.23	148.18									1	65.4716	0.0100202	65.472									1	44.9254	0.0442453	44.925	1	125.356	2.01799e-05	125.36					1	148.183	5.00232e-11	148.18	N	YATDYKVVTQNSSSGNVTHEKIPIGTEIEGM	X;X;X;X;X;X;X;X;X;X;Deamidation 18O (N);X;X;X;X;Deamidation 18O (N);X;X;X;X;X;X;X;X;X;X;X;X;X;X;X
596	B2R7N9	cDNA, FLJ93532, highly similar to Homo sapiens osteomodulin (OMD), mRNA		B2R7N9	0.807506	6.22737	1.13039e-22	133.58	120.33	116.24													0.807506	6.22737	1.024e-10	116.24					0.775603	5.38624	1.13039e-22	133.58													N	MPPGLPSSLMYLSLENNSISSIPEKYFDKLP	X;X;X;X;X;X;X;X;X;Oxidation (M);X;X;X;X;X;Deamidation 18O (N);X;X;X;X;X;X;X;X;X;X;X;X;X;X;X
597	B2R7N9	cDNA, FLJ93532, highly similar to Homo sapiens osteomodulin (OMD), mRNA		B2R7N9	1	67.8637	1.28347e-39	176.84	163.77	67.864	1	90.8841	4.83349e-25	147.21	1	154.336	5.23935e-32	159.14	1	64.7489	7.338e-14	132.45					1	176.842	1.28347e-39	176.84	1	67.8637	4.9852e-39	169.84									1	118.346	2.60587e-08	118.35	N	NLEHLYLQNNEIEKMNLTVMCPSIDPLHYHH	X;X;X;X;X;X;X;X;X;X;X;X;X;X;X;Deamidation 18O (N);X;X;X;Oxidation (M);X;X;X;X;X;X;X;X;X;X;X
598	Q6IAP9	PRPF4 protein	PRPF4	Q6IAP9	1	96.9477	0.00453115	96.948	23.699	96.948																																	1	96.9477	0.00453115	96.948	N	EVLAEFERRKRARQINVSTDDSEVKACLRAL	X;X;X;X;X;X;X;X;X;X;X;X;X;X;X;Deamidation 18O (N);X;X;X;X;X;X;X;X;X;X;X;X;X;X;X
599	Q59EE5	Tissue factor pathway inhibitor (Lipoprotein-associated coagulation inhibitor) variant (Fragment)		Q59EE5	0.820622	6.60374	0.024667	86.833	71.394	86.833													0.820622	6.60374	0.024667	86.833																					N	DPGICRGYITRYFYNNQTKQCERFKYGGCLG	X;X;X;X;X;X;X;X;X;X;X;X;X;X;X;Deamidation 18O (N);X;X;X;X;X;X;X;X;X;X;X;X;X;X;X
600	B2R9K6	cDNA, FLJ94436, highly similar to Homo sapiens platelet derived growth factor C (PDGFC), mRNA		B2R9K6	1	120.526	1.37605e-05	120.53	80.051	120.53																									1	119.867	0.000139665	119.87					1	120.526	1.37605e-05	120.53	N	GVQDPQHERIITVSTNGSIHSPRFPHTYPRN	X;X;X;X;X;X;X;X;X;X;X;X;X;X;X;Deamidation 18O (N);X;X;X;X;X;X;X;X;X;X;X;X;X;X;X
601	B2RA94	cDNA, FLJ94779		B2RA94	0.842327	7.27724	2.4641e-228	321.01	246.17	313.36	0.781048	5.52329	9.26097e-62	243.4									0.798123	5.96984	1.25102e-72	250.69					0.637566	2.45297	5.43449e-14	133.71	0.809252	6.27625	2.4641e-228	321.01	0.842327	7.27724	4.44203e-203	313.36					N	TFWKLSSLEYLDLSSNNLSRVPAGLPRSLVL	X;X;X;X;X;X;X;X;X;X;X;X;X;X;X;Deamidation 18O (N);X;X;X;X;X;X;X;X;X;X;X;X;X;X;X
602	B2RA94	cDNA, FLJ94779		B2RA94	0.79279	5.82747	5.226e-86	258.78	192.73	258.78																																	0.79279	5.82747	5.226e-86	258.78	N	FWKLSSLEYLDLSSNNLSRVPAGLPRSLVLL	X;X;X;X;X;X;X;X;X;X;X;X;X;X;X;Deamidation 18O (N);X;X;X;X;X;X;X;X;X;X;X;X;X;X;X
603	K7EPJ4	Cartilage intermediate layer protein 2 (Cartilage intermediate layer protein 2, isoform CRA_b)	CILP2 hCG_38566	K7EPJ4	1	51.5572	4.19133e-06	100.68	94.029	51.557					1	100.678	4.19133e-06	100.68	1	51.5572	0.000934445	51.557																									N	AQMDGFSAGEAQAQANGSISVVTIILDKLEK	X;X;X;X;X;X;X;X;X;X;X;X;X;X;X;Deamidation 18O (N);X;X;X;X;X;X;X;X;X;X;X;X;X;X;X
604	K7EPJ4	Cartilage intermediate layer protein 2 (Cartilage intermediate layer protein 2, isoform CRA_b)	CILP2 hCG_38566	K7EPJ4	1	208.589	5.38994e-18	208.59	185.85	208.59	1	160.531	3.32159e-05	160.53	1	170.471	6.33476e-05	170.47	1	163.427	4.27685e-05	163.43	1	163.16	4.18299e-05	163.16	1	105.396	0.00425956	105.4	1	165.584	5.03478e-05	165.58	1	185.327	4.28749e-06	185.33	1	208.589	5.38994e-18	208.59					N	YLVKHPESRVREAGQNVTFCCKASGTPMPKK	X;X;X;X;X;X;X;X;X;X;X;X;X;X;X;Deamidation 18O (N);X;X;X;X;X;X;X;X;X;X;X;X;X;X;X
605	K7EPJ4	Cartilage intermediate layer protein 2 (Cartilage intermediate layer protein 2, isoform CRA_b)	CILP2 hCG_38566	K7EPJ4	1	81.5653	5.49896e-72	254.07	210.79	81.565	1	111.388	1.19011e-05	138.45	1	152.854	5.11329e-06	152.85	1	124.302	5.49896e-72	254.07	1	72.8912	0.0128545	72.891	1	69.0301	0.0173813	69.03	1	88.1865	0.00713706	88.187					1	70.6216	7.15622e-06	153.95	1	81.5653	5.42616e-06	140.78	N	KASGTPMPKKYSWFHNGTLLDRRAHGYGAHL	X;X;X;X;X;X;X;X;X;X;X;X;X;X;X;Deamidation 18O (N);X;X;X;X;X;X;X;X;X;X;X;X;X;X;X
606	B2RAK1	cDNA, FLJ94965, highly similar to Homo sapiens leucyl/cystinyl aminopeptidase (LNPEP), mRNA		B2RAK1	1	251.025	1.02822e-72	251.03	223.7	251.03													1	202.442	4.01666e-23	202.44									1	224.237	1.86968e-38	224.24	1	199.274	6.99302e-23	199.27	1	251.025	1.02822e-72	251.03	N	WGLLTFREETLLYDSNTSSMADRKLVTKIIA	X;X;X;X;X;X;X;X;X;X;X;X;X;X;X;Deamidation 18O (N);X;X;X;X;X;X;X;X;X;X;X;X;X;X;X
607	B2RAK1	cDNA, FLJ94965, highly similar to Homo sapiens leucyl/cystinyl aminopeptidase (LNPEP), mRNA		B2RAK1	1	101.719	0.00325387	101.72	72.378	101.72													1	76.3258	0.0100167	76.326													1	101.719	0.00325387	101.72					N	KYQSVSLLDKKSGVINLTEEVLWVKVNINMN	X;X;X;X;X;X;X;X;X;X;X;X;X;X;X;Deamidation 18O (N);X;X;X;X;X;X;X;X;X;X;X;X;X;X;X
608	B2RAK1	cDNA, FLJ94965, highly similar to Homo sapiens leucyl/cystinyl aminopeptidase (LNPEP), mRNA		B2RAK1	1	93.7544	0.000534563	93.754	68.819	93.754																									1	67.2143	0.0215062	67.214	1	93.7544	0.000534563	93.754					N	PTAVVPLRYELSLHPNLTSMTFRGSVTISVQ	X;X;X;X;X;X;X;X;X;X;X;X;X;X;X;Deamidation 18O (N);X;X;X;X;X;X;X;X;X;X;X;X;X;X;X
609	H0Y7R7	5'-nucleotidase (Fragment)	NT5E	H0Y7R7	1	80.4459	1.75778e-151	279.5	253.78	279.5					0.999962	45.6984	5.86637e-27	137.73	0.9998	39.1014	0.000594992	84.68	1	69.8114	1.00614e-116	256.49	0.999526	33.7721	0.00392001	62.1	0.999997	56.0498	0.000424655	90.468	1	63.7462	6.16328e-20	134.28	1	80.4459	1.75778e-151	279.5	1	76.1688	1.61579e-70	197.1	N	ERGNVISSHGNPILLNSSIPEDPSIKADINK	X;X;X;X;X;X;X;X;X;X;X;X;X;X;X;Deamidation 18O (N);X;X;X;X;X;X;X;X;X;X;X;X;X;X;X
610	H0Y7R7	5'-nucleotidase (Fragment)	NT5E	H0Y7R7	1	147.778	3.65275e-14	193.38	155.9	147.78	1	78.9316	0.0270141	78.932	1	166.187	5.24668e-05	166.19					1	183.03	7.48095e-06	183.03					1	105.195	0.00429037	105.2	1	142.941	3.61255e-05	169.93	1	174.415	4.05066e-05	174.41	1	147.778	3.65275e-14	193.38	N	PSIKADINKWRIKLDNYSTQELGKTIVYLDG	X;X;X;X;X;X;X;X;X;X;X;X;X;X;X;Deamidation 18O (N);X;X;X;X;X;X;X;X;X;X;X;X;X;X;X
611	E9PE72	Ectonucleotide pyrophosphatase/phosphodiesterase family member 1	ENPP1	E9PE72	1	83.2061	0.023178	89.752	65.12	83.206					1	85.2117	0.0405265	85.212					1	89.7522	0.023178	89.752	1	86.7939	0.0247072	86.794	1	83.2061	0.0284067	83.206													N	ESHGIIDNKMYDPKMNASFSLKSKEKFNPEW	X;X;X;X;X;X;X;X;X;X;X;X;X;X;X;Deamidation 18O (N);X;X;X;X;X;X;X;X;X;X;X;X;X;X;X
612	E9PE72	Ectonucleotide pyrophosphatase/phosphodiesterase family member 1	ENPP1	E9PE72	1	98.0402	4.18125e-08	190.96	177.38	98.04	1	133.807	3.32245e-05	133.81	1	125.747	6.30293e-05	125.75	1	125.747	6.30293e-05	125.75	1	98.0402	5.53421e-05	171.85	1	99.5681	0.00515243	99.568	1	137.953	3.50067e-05	137.95	1	190.962	4.18125e-08	190.96	1	157.663	2.87455e-05	157.66	1	133.227	3.34257e-05	133.23	N	DVEINGIFPDIYKMYNGSVPFEERILAVLQW	X;X;X;X;X;X;X;X;X;X;X;X;X;Oxidation (M);X;Deamidation 18O (N);X;X;X;X;X;X;X;X;X;X;X;X;X;X;X
613	B2RC09	cDNA, FLJ95794, highly similar to Homo sapiens apolipoprotein F (APOF), mRNA		B2RC09	1	77.4314	0.000831845	87.618	70.592	77.431													1	50.8431	0.0295821	50.843	1	46.9641	0.0348305	46.964	1	66.7969	0.00952451	66.797	1	87.618	0.000831845	87.618					1	77.4314	0.00260854	77.431	N	DVWALQLQLYRQGGVNATQVLIQHLRGLQKG	X;X;X;X;X;X;X;X;X;X;X;X;X;X;X;Deamidation 18O (N);X;X;X;X;X;X;X;X;X;X;X;X;X;X;X
614	B2RC89	cDNA, FLJ95913, highly similar to Homo sapiens keratocan (KERA), mRNA		B2RC89	1	86.4978	0.001556	86.498	64.452	86.498																																	1	86.4978	0.001556	86.498	N	HLQHLHLDHNKIKSVNVSVICPSPSMLPAER	X;X;X;X;X;X;X;X;X;X;X;X;X;X;X;Deamidation 18O (N);X;X;X;X;X;X;X;X;X;X;X;X;X;X;X
615	B7Z8Q7	cDNA FLJ53871, highly similar to Inter-alpha-trypsin inhibitor heavy chain H4		B7Z8Q7	1	190.304	0	380.73	351.74	190.3					1	161.514	5.64449e-48	161.51					1	192.57	4.53584e-57	192.57									1	380.726	0	380.73	1	134.557	1.4793e-21	134.56	1	190.304	6.60253e-57	190.3	N	PDVLTATVSGKLPTQNITFQTESSVAEQEAE	X;X;X;X;X;X;X;X;X;X;X;X;X;X;X;Deamidation 18O (N);X;X;X;X;X;X;X;X;X;X;X;X;X;X;X
616	Q53RS1	Uncharacterized protein ADAM17 (Fragment)	ADAM17	Q53RS1	1	90.1504	0.0137717	90.15	68.85	90.15													1	90.1504	0.0137717	90.15																					N	NCQFETAQKKCQEAINATCKGVSYCTGNSSE	X;X;X;X;X;X;X;X;X;X;X;X;X;X;X;Deamidation 18O (N);X;X;X;X;X;X;X;X;X;X;X;X;X;X;X
617	Q53RS1	Uncharacterized protein ADAM17 (Fragment)	ADAM17	Q53RS1	0.999652	34.5854	3.20543e-24	145.71	141.24	145.71													0.999652	34.5854	3.20543e-24	145.71																					N	IPFCEREQQLESCACNETDNSCKVCCRDLSG	X;X;X;X;X;X;X;X;X;X;X;X;X;X;X;Deamidation 18O (N);X;X;X;X;X;X;X;X;X;X;X;X;X;X;X
618	B2RXL4	Aquaporin	AQP12B	B2RXL4	1	54.2757	0.0172427	54.276	14.276	54.276																													1	54.2757	0.0172427	54.276					N	___________MAGLNVSLSFFFATFALCEA	X;X;X;X;X;X;X;X;X;X;X;X;X;X;X;Deamidation 18O (N);X;X;X;X;X;X;X;X;X;X;X;X;X;X;X
619	X6R8F3	Neutrophil gelatinase-associated lipocalin	LCN2	X6R8F3	1	88.3919	0.0107714	98.055	85.018	88.392					1	98.0545	0.0107714	98.055	1	70.5516	0.0356088	70.552																	1	88.3919	0.0143563	88.392					N	KMYATIYELKEDKSYNVTSVLFREKAQKCDY	X;X;X;X;X;X;X;X;X;X;X;X;X;X;X;Deamidation 18O (N);X;X;X;X;X;X;X;X;X;X;X;X;X;X;X
620	B3KS71	cDNA FLJ35671 fis, clone SPLEN2018180, highly similar to Cartilage-associated protein		B3KS71	1	216.505	3.38663e-79	216.51	198.85	216.51																													1	216.505	3.38663e-79	216.51					N	SDEHFQPRPEAVQFFNVTTLQKELYDFAKEN	X;X;X;X;X;X;X;X;X;X;X;X;X;X;X;Deamidation 18O (N);X;X;X;X;X;X;X;X;X;X;X;X;X;X;X
621	B3KS71	cDNA FLJ35671 fis, clone SPLEN2018180, highly similar to Cartilage-associated protein		B3KS71	1	195.197	5.28016e-35	195.2	173.64	195.2																													1	195.197	5.28016e-35	195.2					N	RLHRLLRDSEAFCHRNCSAAPQPEPAAGLAS	X;X;X;X;X;X;X;X;X;X;X;X;X;X;X;Deamidation 18O (N);X;X;X;X;X;X;X;X;X;X;X;X;X;X;X
622	K7EP71	Heparan sulfate 2-O-sulfotransferase 1 (Fragment)	HS2ST1	K7EP71	1	74.5621	0.0148409	74.562	56.698	74.562													1	71.5242	0.0148409	71.524																	1	74.5621	0.0148746	74.562	N	AYDLCAKNKYHVLHINTTKNNPVMSLQDQVR	X;X;X;X;X;X;X;X;X;X;X;X;X;X;X;Deamidation 18O (N);X;X;X;X;X;X;X;X;X;X;X;X;X;X;X
623	C9JYM4	Golgi membrane protein 1 (Fragment)	GOLM1	C9JYM4	0.999755	36.1018	3.53111e-46	234.81	195.26	229.48	0.889666	9.06519	0.00461805	105.4	0.811222	6.33188	0.014337	78.939	0.88928	9.04811	0.00208661	112.75	0.842392	7.27937	1.21701e-05	135.55					0.890038	9.08165	0.000500682	121.83	0.999597	33.9481	3.53111e-46	234.81	0.999755	36.1018	1.73586e-35	229.48	0.999167	30.7912	1.41693e-18	209.73	N	SVNKLYQDEKAVLVNNITTGERLIRVLQ___	X;X;X;X;X;X;X;X;X;X;X;X;X;X;X;Deamidation 18O (N);X;X;X;X;X;X;X;X;X;X;X;X;X;X;X
624	B4DX43	cDNA FLJ52980, highly similar to CD166 antigen		B4DX43	1	239.191	3.37956e-77	239.19	223.05	239.19																													1	239.191	3.37956e-77	239.19					N	KKLGDCISEDSYPDGNITWYRNGKVLHPLEG	X;X;X;X;X;X;X;X;X;X;X;X;X;X;X;Deamidation 18O (N);X;X;X;X;X;X;X;X;X;X;X;X;X;X;X
625	B4DX43	cDNA FLJ52980, highly similar to CD166 antigen		B4DX43	0.999995	52.6314	3.80457e-05	125.28	78.678	125.28													0.999995	52.6314	3.80457e-05	125.28																					N	YDDVPEYKDRLNLSENYTLSISNARISDEKR	X;X;X;X;X;X;X;X;X;X;X;X;X;X;X;Deamidation 18O (N);X;X;X;X;X;X;X;X;X;X;X;X;X;X;X
626	B3KNV8	Polypeptide N-acetylgalactosaminyltransferase (EC 2.4.1.-) (Protein-UDP acetylgalactosaminyltransferase)		B3KNV8	1	99.8021	0.0117113	105.57	46.362	99.802	1	83.2061	0.0239711	83.206	1	69.5982	0.0400654	69.598																	1	71.8775	0.036385	71.877	1	105.568	0.0117113	105.57	1	99.8021	0.0155903	99.802	N	WCRYLNPPKAWWKLENSTAPIRSPALIGCFI	X;X;X;X;X;X;X;X;X;X;X;X;X;X;X;Deamidation 18O (N);X;X;X;X;X;X;X;X;X;X;X;X;X;X;X
627	Q6PEJ8	HP protein	HP	Q6PEJ8	1	177.427	4.21042e-133	266.94	247.22	266.94	1	118.597	4.10614e-42	185.45	1	96.8754	2.71287e-39	161.46	1	123.775	2.50871e-40	177.22	1	117.462	8.87433e-58	209.75					1	110.137	1.09564e-39	170.27	1	94.7371	8.35108e-40	172.42	1	177.427	4.21042e-133	266.94	1	124.291	2.03656e-51	205.43	N	__________MVSHHNLTTGATLINEQWLLT	X;X;X;X;X;X;X;X;X;X;Oxidation (M);X;X;X;X;Deamidation 18O (N);X;X;X;X;X;X;X;X;X;X;X;X;X;X;X
628	Q6PEJ8	HP protein	HP	Q6PEJ8	1	137.238	7.52067e-93	269.99	235.46	253.97	1	76.192	0.00218672	105.66	1	63.4854	0.00262871	97.273					1	73.2797	0.00078589	113.76					1	74.2321	0.000471797	117.03	1	68.7262	0.000481079	116.84	1	137.238	4.1316e-77	253.97	1	118.33	7.52067e-93	269.99	N	INEQWLLTTAKNLFLNHSENATAKDIAPTLT	X;X;X;X;X;X;X;X;X;X;X;X;X;X;X;Deamidation 18O (N);X;X;X;Deamidation 18O (N);X;X;X;X;X;X;X;X;X;X;X
629	Q6PEJ8	HP protein	HP	Q6PEJ8	1	197.629	7.52067e-93	269.99	235.46	269.99	1	100.578	0.00218672	105.66	1	88.1416	0.00262871	97.273					1	103.332	0.00078589	113.76					1	105.159	0.000471797	117.03	1	108.274	0.000481079	116.84	1	194.962	4.1316e-77	253.97	1	197.629	7.52067e-93	269.99	N	WLLTTAKNLFLNHSENATAKDIAPTLTLYVG	X;X;X;X;X;X;X;X;X;X;X;Deamidation 18O (N);X;X;X;Deamidation 18O (N);X;X;X;X;X;X;X;X;X;X;X;X;X;X;X
630	Q6PEJ8	HP protein	HP	Q6PEJ8	1	239.872	4.03122e-101	262.23	248	239.87	1	157.865	8.58063e-19	192.54	1	210.905	8.29094e-30	210.9	1	188.467	1.55606e-18	188.47	1	262.226	4.03122e-101	262.23	1	121.787	1.27828e-05	121.79	1	191.776	9.88639e-19	191.78	1	216.884	1.84992e-37	216.88	1	189.369	1.40136e-18	189.37	1	239.872	9.8153e-60	239.87	N	GKKQLVEIEKVVLHPNYSQVDIGLIKLKQKV	X;X;X;X;X;X;X;X;X;X;X;X;X;X;X;Deamidation 18O (N);X;X;X;X;X;X;X;X;X;X;X;X;X;X;X
631	B3KQE1	cDNA FLJ90315 fis, clone NT2RP2001480, highly similar to Thrombospondin-3		B3KQE1	1	152.638	7.16446e-09	170.02	153.39	152.64					1	90.6531	0.028469	90.653	1	101.929	0.00377182	101.93	1	141.711	2.06671e-07	141.71									1	170.022	1.9516e-08	170.02	1	150.457	7.53132e-09	150.46	1	152.638	7.16446e-09	152.64	N	FSQENIIWSNLQYRCNDTVPEDFEPFRRQLL	X;X;X;X;X;X;X;X;X;X;X;X;X;X;X;Deamidation 18O (N);X;X;X;X;X;X;X;X;X;X;X;X;X;X;X
632	B3KQE1	cDNA FLJ90315 fis, clone NT2RP2001480, highly similar to Thrombospondin-3		B3KQE1	1	336.173	1.14504e-282	336.17	300.21	336.17					1	153.946	6.54059e-27	153.95	1	121.899	9.96305e-05	121.9	1	280.17	9.25531e-136	280.17	1	184.361	4.53196e-15	184.36	1	172.804	1.0773e-13	172.8	1	326.852	1.54588e-254	326.85	1	268.906	7.92888e-101	268.91	1	336.173	1.14504e-282	336.17	N	VGSFKCGPCRLGFLGNQSQGCLPARTCHSPA	X;X;X;X;X;X;X;X;X;X;X;X;X;X;X;Deamidation 18O (N);X;X;X;X;X;X;X;X;X;X;X;X;X;X;X
633	Q5H9B4	Metalloproteinase inhibitor 1 (Fragment)	TIMP1	Q5H9B4	1	237.526	0	365.49	302.08	237.53	1	297.201	3.78095e-157	297.2	1	365.493	0	365.49	1	336.929	1.03882e-282	336.93	1	315.13	8.01478e-203	315.13	1	147.368	1.14979e-11	147.37	1	178.53	2.0512e-14	178.53					1	284.281	5.07752e-136	284.28	1	237.526	1.38032e-58	237.53	N	SDLVIRAKFVGTPEVNQTTLYQRYEIKMTKM	X;X;X;X;X;X;X;X;X;X;X;X;X;X;X;Deamidation 18O (N);X;X;X;X;X;X;X;X;X;X;X;X;X;X;X
634	Q6IAW5	CALU protein (Calumenin) (Calumenin, isoform CRA_b) (cDNA, FLJ92797, Homo sapiens calumenin (CALU), mRNA)	CALU hCG_41656 tcag7.422	Q6IAW5	1	301.486	7.33022e-201	303.7	290.93	303.7																									1	214.76	5.11441e-55	222.29	1	289.301	8.09947e-178	291.51	1	301.486	7.33022e-201	303.7	N	HDLNEDGLVSWEEYKNATYGYVLDDPDPDDG	X;X;X;X;X;X;X;X;X;X;X;X;X;X;X;Deamidation 18O (N);X;X;X;X;X;X;X;X;X;X;X;X;X;X;X
635	B3KQQ3	cDNA PSEC0016 fis, clone NT2RM1001076, highly similar to Procollagen-lysine,2-oxoglutarate 5-dioxygenase 3		B3KQQ3	1	113.622	0.000997215	159.58	119.54	113.62					1	89.2472	0.014072	89.247	1	102.609	0.00806061	102.61	1	136.988	0.000994694	136.99									1	146.785	0.000997215	146.79	1	159.585	0.00114768	159.58	1	113.622	0.00207537	113.62	N	ETEGYLRFLRSAEFFNYTVRTLGLGEEWRGG	X;X;X;X;X;X;X;X;X;X;X;X;X;X;X;Deamidation 18O (N);X;X;X;X;X;X;X;X;X;X;X;X;X;X;X
636	O95084	Serine protease 23 (EC 3.4.21.-) (Putative secreted protein Zsig13)	PRSS23 ZSIG13 UNQ270/PRO307	O95084	1	238.007	2.36022e-52	238.01	221.17	238.01													1	65.2948	0.0307256	65.295													1	238.007	2.36022e-52	238.01					N	VGFLKPKFKDGGRGANDSTSAMPEQMKFQWI	X;X;X;X;X;X;X;X;X;X;X;X;X;X;X;Deamidation 18O (N);X;X;X;X;X;X;X;X;X;X;X;X;X;X;X
637	O95084	Serine protease 23 (EC 3.4.21.-) (Putative secreted protein Zsig13)	PRSS23 ZSIG13 UNQ270/PRO307	O95084	1	69.4507	0.0247738	69.451	54.249	69.451													1	69.4507	0.0247738	69.451																					N	YEEAKQYLSYETLYANGSRTETQVGIYILSS	X;X;X;X;X;X;X;X;X;X;X;X;X;X;X;Deamidation 18O (N);X;X;X;X;X;X;X;X;X;X;X;X;X;X;X
638	H7BZJ3	Protein disulfide-isomerase A3 (Fragment)	PDIA3	H7BZJ3	0.984545	18.2829	2.56543e-05	132.78	120.93	132.78													0.974826	16.1581	0.000146577	127.76									0.984545	18.2829	2.56543e-05	132.78									N	KGIVPLAKVDCTANTNTCNKYGVSGYPTLKI	X;X;X;X;X;X;X;X;X;X;X;X;X;X;X;Deamidation 18O (N);X;X;X;X;X;X;X;X;X;X;X;X;X;X;X
639	Q8N294	cDNA FLJ33633 fis, clone BRAMY2022786, highly similar to Homo sapiens dickkopf-3 (DKK-3) mRNA		Q8N294	1	155.711	2.65109e-31	186.78	186.78	186.78	1	74.0571	0.00527079	90.827	1	155.711	2.2621e-06	186.78	1	139.119	4.65497e-05	173.37	1	92.6749	0.000117709	123.75	0.999986	48.5538	0.0461893	67.334	1	82.6008	0.00487473	101.38	1	129.288	1.95139e-22	160.36					1	138.332	2.65109e-31	169.41	N	_________MATRGSNGTICDNQRDCQPGLC	X;X;X;X;X;X;X;X;X;X;X;X;X;X;X;Deamidation 18O (N);X;X;X;X;X;X;X;X;X;X;X;X;X;X;X
640	Q8N294	cDNA FLJ33633 fis, clone BRAMY2022786, highly similar to Homo sapiens dickkopf-3 (DKK-3) mRNA		Q8N294	0.992027	20.9487	0.000625604	163.16	135.73	111.06					0.985747	18.3985	0.00182148	109.66	0.99038	20.1263	0.000625604	163.16	0.992027	20.9487	0.00150154	111.06					0.874979	8.45016	0.0175818	70.1	0.944248	12.2882	0.0173424	68.49									N	PPSYHNETNTDTKVGNNTIHVHREIHKITNN	X;X;X;X;X;X;X;X;X;X;X;X;X;X;X;Deamidation 18O (N);X;X;X;X;X;X;X;X;X;X;X;X;X;X;X
641	F5H627	Tumor necrosis factor receptor superfamily member 3	LTBR	F5H627	1	93.2032	0.00246512	93.203	82.878	93.203													1	74.4602	0.00896559	74.46									1	91.8546	0.00585459	91.855					1	93.2032	0.00246512	93.203	N	KGNNHCVPCKAGHFQNTSSPSARCQPHTRCE	X;X;X;X;X;X;X;X;X;X;X;X;X;X;X;Deamidation 18O (N);X;X;X;X;X;X;X;X;X;X;X;X;X;X;X
642	E9PP15	Low-density lipoprotein receptor-related protein 8 (Fragment)	LRP8	E9PP15	0.999999	62.8278	0.023336	68.551	34.666	68.551													0.999999	62.8278	0.023336	68.551																					N	_MLKNVVALDVEVATNRIYWCDLSYRKIYSA	X;X;X;X;X;X;X;X;X;X;X;X;X;X;X;Deamidation 18O (N);X;X;X;X;X;X;X;X;X;X;X;X;X;X;X
643	Q53H91	Phospholipid transfer protein isoform a variant (Fragment)		Q53H91	1	122.344	7.60015e-120	286.4	257.6	122.34	1	215.077	1.86822e-19	215.08	1	126.765	1.53909e-59	251.34	1	129.838	4.24687e-05	129.84	1	271.143	4.60271e-102	271.14	1	89.3564	0.00304657	89.356	1	107.966	0.00167007	107.97	1	101.888	3.98556e-72	256.19	1	105.649	7.60015e-120	286.4	1	122.344	0.000194191	122.34	N	ITIPDLRGKEGHFYYNISEVKVTELQLTSSE	X;X;X;X;X;X;X;X;X;X;X;X;X;X;X;Deamidation 18O (N);X;X;X;X;X;X;X;X;X;X;X;X;X;X;X
644	Q53H91	Phospholipid transfer protein isoform a variant (Fragment)		Q53H91	1	197.734	6.49075e-72	252.69	217.24	197.73													1	252.689	6.49075e-72	252.69	1	160.183	1.01868e-05	160.18	1	122.691	0.000401863	122.69	1	224.094	5.0424e-27	224.09	1	184.239	1.80766e-06	184.24	1	197.734	1.22994e-12	197.73	N	GLELSRDPAGRMKVSNVSCQASVSRMHAAFG	X;X;X;X;X;X;X;X;X;X;X;X;X;X;X;Deamidation 18O (N);X;X;X;X;X;X;X;X;X;X;X;X;X;X;X
645	B3KUI0	cDNA FLJ39945 fis, clone SPLEN2023977, highly similar to Homo sapiens CD97 antigen (CD97), transcript variant 2, mRNA		B3KUI0	1	153.946	1.29394e-22	153.95	128.39	153.95																									1	153.946	1.29394e-22	153.95									N	SNTELTLMIQERGDKNVTMGQSSARMKLNWA	X;X;X;X;X;X;X;X;X;X;X;X;X;X;X;Deamidation 18O (N);X;X;X;X;X;X;X;X;X;X;X;X;X;X;X
646	B3KUI0	cDNA FLJ39945 fis, clone SPLEN2023977, highly similar to Homo sapiens CD97 antigen (CD97), transcript variant 2, mRNA		B3KUI0	0.865825	8.09764	1.82943e-60	183	147.34	88.73													0.853696	7.66048	4.28158e-14	159.22	0.865825	8.09764	0.00108178	88.73	0.819628	6.57448	0.000167277	114.31					0.85892	7.84488	1.82943e-60	183					N	QLRRLSAVNSIFLSHNNTKELNSPILFAFSH	X;X;X;X;X;X;X;X;X;X;X;X;X;X;X;Deamidation 18O (N);X;X;X;X;X;X;X;X;X;X;X;X;X;X;X
647	B3KVV1	cDNA FLJ41563 fis, clone CTONG1000341, highly similar to THROMBOMODULIN		B3KVV1	0.942015	12.1074	1.73909e-19	147.71	119.69	147.71					0.942015	12.1074	1.73909e-19	147.71	0.5	0	1.14943e-07	138.63	0.914509	10.2927	9.13233e-10	131.37																					N	KRLGPLRGFQWVTGDNNTSYSRWARLDLNGA	X;X;X;X;X;X;X;X;X;X;X;X;X;X;X;Deamidation 18O (N);X;X;X;X;X;X;X;X;X;X;X;X;X;X;X
648	B3KVV1	cDNA FLJ41563 fis, clone CTONG1000341, highly similar to THROMBOMODULIN		B3KVV1	0.5	0	1.14943e-07	138.63	118.86	138.63									0.5	0	1.14943e-07	138.63																									N	RLGPLRGFQWVTGDNNTSYSRWARLDLNGAP	X;X;X;X;X;X;X;X;X;X;X;X;X;X;X;X;X;X;X;X;X;X;X;X;X;X;X;X;X;X;X
649	B3KWI4	cDNA FLJ43122 fis, clone CTONG3003737, highly similar to Leucine-rich repeat-containing protein 15		B3KWI4	1	126.267	7.12501e-192	309.94	275.41	309.94																	0.999951	45.2387	3.73634e-09	166.97	0.999998	60.3005	2.81266e-09	162.36	1	104.493	8.68375e-129	288.17	1	126.267	7.12501e-192	309.94	0.999987	50.943	4.274e-09	169.65	N	QDLDGNVFRMLANLQNISLQNNRLRQLPGNI	X;X;X;X;X;X;X;X;X;X;X;X;X;X;X;Deamidation 18O (N);X;X;X;X;X;X;X;X;X;X;X;X;X;X;X
650	B3KXM6	cDNA FLJ45735 fis, clone JCMLC2000273, highly similar to Integrin alpha-M		B3KXM6	1	117.512	3.5446e-05	138.98	111.72	138.98													1	117.512	3.5446e-05	138.98																					N	VDSKASLGNKLLLKANVTSENNMPRTNKTEF	X;X;X;X;X;X;X;X;X;X;X;X;X;X;X;Deamidation 18O (N);X;X;X;X;X;X;X;X;X;X;X;X;X;X;X
651	B3KXM6	cDNA FLJ45735 fis, clone JCMLC2000273, highly similar to Integrin alpha-M		B3KXM6	1	135.662	1.38842e-08	135.66	116.88	135.66																					1	118.403	0.00479219	118.4					1	135.662	1.38842e-08	135.66					N	VYMVVTSHGVSTKYLNFTASENTSRVMQHQY	X;X;X;X;X;X;X;X;X;X;X;X;X;X;X;Deamidation 18O (N);X;X;X;X;X;Deamidation 18O (N);X;X;X;X;X;X;X;X;X
652	B3KXM6	cDNA FLJ45735 fis, clone JCMLC2000273, highly similar to Integrin alpha-M		B3KXM6	1	135.662	1.38842e-08	135.66	116.88	135.66																					1	118.403	0.00479219	118.4					1	135.662	1.38842e-08	135.66					N	SHGVSTKYLNFTASENTSRVMQHQYQVSNLG	X;X;X;X;X;X;X;X;X;Deamidation 18O (N);X;X;X;X;X;Deamidation 18O (N);X;X;X;X;X;X;X;X;X;X;X;X;X;X;X
653	B4DDJ5	Macrophage scavenger receptor types I and II (cDNA FLJ55770, highly similar to Macrophage scavenger receptor types I and II)	MSR1	B4DDJ5	1	96.9477	0.0175108	96.948	92.591	96.948													1	96.9477	0.0175108	96.948																					N	STNANDITQSLTGKGNDSEEEMRFQEVFMEH	X;X;X;X;X;X;X;X;X;X;X;X;X;X;X;Deamidation 18O (N);X;X;X;X;X;X;X;X;X;X;X;X;X;X;X
654	B4DDJ5	Macrophage scavenger receptor types I and II (cDNA FLJ55770, highly similar to Macrophage scavenger receptor types I and II)	MSR1	B4DDJ5	0.999566	33.6281	0.000577377	180.44	108.94	180.44													0.999566	33.6281	0.000577377	180.44					0.998421	28.0252	0.00100206	137.14					0.98822	19.2373	0.00088303	155.07	0.816635	7.48103	0.035579	75.378	N	VHLEQEIKGEVKVLNNITNDLRLKDWEHSQT	X;X;X;X;X;X;X;X;X;X;X;X;X;X;X;Deamidation 18O (N);X;X;X;X;X;X;X;X;X;X;X;X;X;X;X
655	B4DDJ5	Macrophage scavenger receptor types I and II (cDNA FLJ55770, highly similar to Macrophage scavenger receptor types I and II)	MSR1	B4DDJ5	1	83.8618	0.000451584	122.26	110.77	83.862													1	122.258	0.000451584	122.26					1	95.5732	0.00503932	95.573					1	83.8618	0.00584279	104.82					N	FKQQEEISKLEERVYNVSAEIMAMKEEQVHL	X;X;X;X;X;X;X;X;X;X;X;X;X;X;X;Deamidation 18O (N);X;X;X;X;X;X;X;X;X;X;X;X;X;X;X
656	B4DIF5	Cell cycle control protein		B4DIF5	0.999742	35.8753	0.00110741	80.609	70.552	80.609													0.999742	35.8753	0.00110741	80.609																					N	KSDLHPTLPAGRYSLNVTYNYPVHYFDGRKR	X;X;X;X;X;X;X;X;X;X;X;X;X;X;X;Deamidation 18O (N);X;X;X;X;X;X;X;X;X;X;X;X;X;X;X
657	B4DDQ4	cDNA FLJ53707, highly similar to Lysyl oxidase homolog 2		B4DDQ4	0.967549	14.7444	6.04606e-31	180.05	171.76	180.05													0.967549	14.7444	6.04606e-31	180.05																					N	YHSMEVFTHYDLLNLNGTKVAEGHKASFCLE	X;X;X;X;X;X;X;X;X;X;X;X;X;X;X;Deamidation 18O (N);X;X;X;X;X;X;X;X;X;X;X;X;X;X;X
658	Q5VVQ7	C4b-binding protein beta chain (Fragment)	C4BPB	Q5VVQ7	1	151.974	0.000701755	151.97	136.31	151.97													1	150.362	0.000768446	150.36													1	151.974	0.000701755	151.97					N	VGKKTLFCNASKEWDNTTTECRLGHCPDPVL	X;X;X;X;X;X;X;X;X;X;X;X;X;X;X;Deamidation 18O (N);X;X;X;X;X;X;X;X;X;X;X;X;X;X;X
659	B4DEC8	cDNA FLJ56340, highly similar to Beta-1,3-N-acetylglucosaminyltransferase radical fringe		B4DEC8	0.998187	27.4087	0.0131398	92.051	31.369	76.827									0.998187	27.4087	0.0236316	76.827	0.998002	26.9856	0.0141715	88.948									0.994672	22.7111	0.0336264	76.679	0.989687	19.8213	0.0131398	92.051	0.995679	23.625	0.0139221	89.698	N	DPELELQGGDRVINTNCSAVRTRQALCCKMS	X;X;X;X;X;X;X;X;X;X;X;X;X;X;X;Deamidation 18O (N);X;X;X;X;X;X;X;X;X;X;X;X;X;X;X
660	H0YKJ9	Tetraspanin-3	TSPAN3	H0YKJ9	0.949268	12.7211	3.74767e-15	125.05	118.09	57.432									0.949268	12.7211	0.0017478	57.432																					0.840707	7.22447	3.74767e-15	125.05	N	QSVPLSCCRETASNCNGSLAHPSDLYAEGCE	X;X;X;X;X;X;X;X;X;X;X;X;X;X;X;Deamidation 18O (N);X;X;X;X;X;X;X;X;X;X;X;X;X;X;X
661	H0YKJ9	Tetraspanin-3	TSPAN3	H0YKJ9	1	113.354	6.4113e-13	202.03	179.29	202.03	0.999885	39.3808	0.00899597	85.377	1	113.354	6.4113e-13	202.03	1	88.2522	1.57476e-05	165.63					0.999899	39.9373	0.00486999	103.22	0.9999	40.0061	0.00582169	95.573					1	81.1591	2.0154e-05	169.65	1	95.5583	1.80766e-06	184.24	N	ENEVDRSIQKVYKTYNGTNPDAASRAIDYVQ	X;X;X;X;X;X;X;X;X;X;X;X;X;X;X;Deamidation 18O (N);X;X;X;X;X;X;X;X;X;X;X;X;X;X;X
662	B4DEW5	cDNA FLJ54049, highly similar to Multimerin-2		B4DEW5	1	119.893	6.51642e-46	207.39	181.41	207.39													1	119.893	6.51642e-46	207.39					0.999908	40.3558	0.00105709	96.505													N	ASFSEGTAALQTVKFNTTYINIGSSYFPEHG	X;X;X;X;X;X;X;X;X;X;X;X;X;X;X;Deamidation 18O (N);X;X;X;X;X;X;X;X;X;X;X;X;X;X;X
663	B4DGC3	cDNA FLJ57921, highly similar to Apolipoprotein D		B4DGC3	1	184.914	0	442.7	408.65	211.75	1	215.594	8.2392e-170	287.01	1	305.5	0	370.3	1	327.46	0	442.7	1	263.125	0	389.47									1	267.325	7.43512e-294	331.58	1	176.999	8.75214e-266	323.77	1	184.914	0	349.2	N	ADGTVNQIEGEATPVNLTEPAKLEVKFSWCK	X;X;X;X;X;X;X;X;X;X;X;X;X;X;X;Deamidation 18O (N);X;X;X;X;X;X;X;X;X;X;X;X;X;X;X
664	B4DGC3	cDNA FLJ57921, highly similar to Apolipoprotein D		B4DGC3	1	146.065	7.72514e-93	265.77	253.18	237.93	1	145.655	7.72514e-93	265.77	1	138.597	3.01231e-78	258.72					1	79.1345	4.38029e-23	153.12	0.999999	61.6254	0.0009537	116.23	1	82.104	9.08316e-09	156.48	1	146.065	1.07431e-51	237.93	1	133.145	1.81871e-30	215.89					N	EKIPTTFENGRCIQANYSLMENGKIKVLNQE	X;X;X;X;X;X;X;X;X;X;X;X;X;X;X;Deamidation 18O (N);X;X;X;Oxidation (M);X;X;X;X;X;X;X;X;X;X;X
665	E7ETU9	Procollagen-lysine,2-oxoglutarate 5-dioxygenase 2	PLOD2	E7ETU9	1	106.199	7.38452e-14	202.2	153.11	106.2	1	136.566	0.000973555	136.57	1	113.622	0.00309919	113.62	1	144.77	7.38452e-14	144.77	1	59.4259	0.00176755	167.12	1	149.721	0.000809456	149.72	1	202.203	5.39969e-10	202.2	1	91.5493	0.00414254	109.66	1	166.325	0.00169818	166.33	1	106.199	0.00507832	106.2	N	FYTKVYIDPLKREAINITLDHKCKIFQTLNG	X;X;X;X;X;X;X;X;X;X;X;X;X;X;X;Deamidation 18O (N);X;X;X;X;X;X;X;X;X;X;X;X;X;X;X
666	E7ETU9	Procollagen-lysine,2-oxoglutarate 5-dioxygenase 2	PLOD2	E7ETU9	1	100.451	0.0169461	100.45	54.733	100.45													1	100.451	0.0169461	100.45																					N	________MQSAKYFNYTVKVLGQGEEWRGG	X;X;X;X;X;X;X;X;X;X;X;X;X;X;X;Deamidation 18O (N);X;X;X;X;X;X;X;X;X;X;X;X;X;X;X
667	E7ETU9	Procollagen-lysine,2-oxoglutarate 5-dioxygenase 2	PLOD2	E7ETU9	1	163.151	0.00184428	171.73	135.85	163.15	1	109.478	0.00867887	109.48	1	88.9479	0.0214642	88.948	1	133.235	0.00184428	133.23	1	143.703	0.002486	143.7	1	124.23	0.00197447	124.23	1	118.495	0.00345526	118.5	1	150.362	0.00222858	150.36	1	171.734	0.00350145	171.73	1	163.151	0.00388028	163.15	N	VGEDFQGGGCKFLRYNCSIESPRKGWSFMHP	X;X;X;X;X;X;X;X;X;X;X;X;X;X;X;Deamidation 18O (N);X;X;X;X;X;X;X;X;X;X;X;X;X;X;X
668	B4DHZ6	Transferrin, isoform CRA_c (cDNA FLJ54029, highly similar to Serotransferrin)	TF hCG_2023558	B4DHZ6	0.717908	4.05679	9.27491e-09	147.95	108.93	147.95																					0.717908	4.05679	9.27491e-09	147.95													N	VYIAGKCGLVPVLAENYNKSDNCEDTPEAGY	X;X;X;X;X;X;X;X;X;X;X;X;X;X;X;Deamidation 18O (N);X;X;X;X;X;X;X;X;X;X;X;X;X;X;X
669	B4DHZ6	Transferrin, isoform CRA_c (cDNA FLJ54029, highly similar to Serotransferrin)	TF hCG_2023558	B4DHZ6	0.990779	20.3118	1.99975e-09	180.67	131.26	180.67	0.967126	14.6863	0.000181349	126.29	0.867238	8.15064	1.28319e-08	142.83	0.990779	20.3118	1.99975e-09	180.67	0.977389	16.3576	1.38238e-05	132.88	0.535023	0.609409	0.00489375	97.456					0.974092	15.7517	1.47639e-06	136.52	0.986787	18.7324	1.35435e-08	163.38	0.985559	18.3408	7.00396e-09	151.22	N	IAGKCGLVPVLAENYNKSDNCEDTPEAGYFA	X;X;X;X;X;X;X;X;X;X;X;X;X;X;X;Deamidation 18O (N);X;X;X;X;X;X;X;X;X;X;X;X;X;X;X
670	B4DHZ6	Transferrin, isoform CRA_c (cDNA FLJ54029, highly similar to Serotransferrin)	TF hCG_2023558	B4DHZ6	1	165.619	0	348.73	322.02	248.23	1	145.118	6.68961e-32	185.55	1	170.544	0	348.73	1	196.61	2.75367e-106	261.31	1	205.065	1.32829e-178	290.57					1	146.684	4.50436e-40	200.94	1	153.584	0	325.2	1	131.039	1.31191e-39	199.31	1	165.619	2.20646e-91	248.23	N	CVHKILRQQQHLFGSNVTDCSGNFCLFRSET	X;X;X;X;X;X;X;X;X;X;X;X;X;X;X;Deamidation 18O (N);X;X;X;X;X;X;X;X;X;X;X;X;X;X;X
671	B4DJ06	cDNA FLJ56620		B4DJ06	1	233.369	1.09425e-65	233.37	196.52	233.37	1	145.601	5.86236e-30	145.6	1	134.207	1.08403e-17	134.21					1	189.298	9.63546e-34	189.3									1	228.07	7.7792e-65	228.07	1	233.369	1.09425e-65	233.37					N	LSVRADGKLFVLESQNGSQGLQLEAARLSCK	X;X;X;X;X;X;X;X;X;X;X;X;X;X;X;Deamidation 18O (N);X;X;X;X;X;X;X;X;X;X;X;X;X;X;X
672	K7EQI0	Progranulin (Fragment)	GRN	K7EQI0	1	41.257	3.03757e-22	179.03	179.03	41.257									1	90.6544	0.000651169	90.654	1	77.3901	0.000301178	77.39									1	179.028	3.03757e-22	179.03	1	146.581	5.25987e-15	146.58	1	41.257	1.12418e-15	150.59	N	GVKDVECGEGHFCHDNQTCCRDNRQGWACCP	X;X;X;X;X;X;X;X;X;X;X;X;X;X;X;Deamidation 18O (N);X;X;X;X;X;X;X;X;X;X;X;X;X;X;X
673	Q92542	Nicastrin	NCSTN KIAA0253 UNQ1874/PRO4317	B4DJN0;Q92542	0.997176	25.4785	0.00529585	87.258	66.388	87.258													0.997176	25.4785	0.00529585	87.258																					N	PQTVTRLLYGFLIKANNSWFQSILRQDLRSY	X;X;X;X;X;X;X;X;X;X;X;X;X;X;X;Deamidation 18O (N);X;X;X;X;X;X;X;X;X;X;X;X;X;X;X
674	Q92542	Nicastrin	NCSTN KIAA0253 UNQ1874/PRO4317	B4DJN0;Q92542	1	112.56	5.18287e-09	112.56	75.477	112.56													1	104.026	0.000141714	104.03									1	112.56	5.18287e-09	112.56									N	KDLYEYSWVQGPLHSNETDRLPRCVRSTARL	X;X;X;X;X;X;X;X;X;X;X;X;X;X;X;Deamidation 18O (N);X;X;X;X;X;X;X;X;X;X;X;X;X;X;X
675	B4DJN0	cDNA FLJ51641, highly similar to Nicastrin		B4DJN0	1	49.3429	0.0174006	60.246	41.789	49.343													1	60.246	0.0174006	60.246	1	51.2649	0.0275913	51.265	1	49.3429	0.0308175	49.343													N	__________MLKPINTTGTLKPDDRVVVAA	X;X;X;X;X;X;X;X;X;X;X;X;X;X;X;Deamidation 18O (N);X;X;X;X;X;X;X;X;X;X;X;X;X;X;X
676	Q92542	Nicastrin	NCSTN KIAA0253 UNQ1874/PRO4317	B4DJN0;Q92542	1	58.4255	0.0141504	58.425	37.225	58.425																									1	58.4255	0.0141504	58.425									N	TSLELWMHTDPVSQKNESVRNQVEDLLATLE	X;X;X;X;X;X;X;X;X;X;X;X;X;X;X;Deamidation 18O (N);X;X;X;X;X;X;X;X;X;X;X;X;X;X;X
677	B4DJQ8	cDNA FLJ55694, highly similar to Dipeptidyl-peptidase 1		B4DJQ8	1	78.6526	0.0165749	78.653	59.873	78.653																													1	78.6526	0.0165749	78.653					N	TWVFQVGSSGSQRDVNCSVMGPQEKKVVVYL	X;X;X;X;X;X;X;X;X;X;X;X;X;X;X;Deamidation 18O (N);X;X;X;Oxidation (M);X;X;X;X;X;X;X;X;X;X;X
678	B4DJQ8	cDNA FLJ55694, highly similar to Dipeptidyl-peptidase 1		B4DJQ8	1	173.27	8.8763e-61	175.39	161.76	173.27													1	133.474	3.79172e-14	133.47									1	175.386	2.21765e-29	175.39	1	168.087	5.95727e-29	168.09	1	173.27	8.8763e-61	173.27	N	FFKYKEEGSKVTTYCNETMTGWVHDVLGRNW	X;X;X;X;X;X;X;X;X;X;X;X;X;X;X;Deamidation 18O (N);X;X;X;X;X;X;X;X;X;X;X;X;X;X;X
679	B4DU57	cDNA FLJ50051, highly similar to Carboxypeptidase-like protein X2		B4DU57	1	92.2127	2.65485e-05	147.95	108.93	145.99					0.999987	49.0192	0.00542124	97.813					1	64.8118	0.000112501	123.79	1	72.7263	0.000112501	123.79	1	92.2127	3.02968e-05	145.99	1	72.264	0.00180307	119.16	1	89.9871	2.65485e-05	147.95	0.999991	50.5517	0.00861151	92.428	N	KEMRQLMKVVNEMCPNITRIYNIGKSHQGLK	X;X;X;X;X;X;X;X;X;X;X;X;X;X;X;Deamidation 18O (N);X;X;X;X;X;X;X;X;X;X;X;X;X;X;X
680	B4DPC6	cDNA FLJ51022, highly similar to Extracellular matrix protein 2		B4DPC6	0.5	0	3.65306e-05	176.65	128.78	176.65																									0.5	0	3.65306e-05	176.65									N	AFNGLPNLERLDLSKNNITSSGIGPKAFKLL	X;X;X;X;X;X;X;X;X;X;X;X;X;X;X;Deamidation 18O (N);X;X;X;X;X;X;X;X;X;X;X;X;X;X;X
681	B4DPC6	cDNA FLJ51022, highly similar to Extracellular matrix protein 2		B4DPC6	0.998824	29.2912	5.644e-08	188.66	140.81	188.66	0.848891	7.49562	0.0426106	68.657	0.889666	9.06519	0.00425956	105.4	0.818973	6.55525	0.000881606	117.31	0.993147	21.6114	3.33024e-05	160.59	0.841718	7.25736	6.21497e-05	125.97	0.991414	20.6248	3.34134e-05	134.25	0.998824	29.2912	5.644e-08	188.66	0.840018	7.20217	0.000372294	121.6	0.993824	22.0659	4.05541e-05	174.41	N	FNGLPNLERLDLSKNNITSSGIGPKAFKLLK	X;X;X;X;X;X;X;X;X;X;X;X;X;X;X;Deamidation 18O (N);X;X;X;X;X;X;X;X;X;X;X;X;X;X;X
682	B4DLK9	cDNA FLJ56855, highly similar to Macrophage mannose receptor 1		B4DLK9	0.999952	43.2484	9.04594e-46	208.97	195.29	208.97													0.999952	43.2484	9.04594e-46	208.97																					N	QMETSNERVWIALNSNLTDNQYTWTDKWRVR	X;X;X;X;X;X;X;X;X;X;X;X;X;X;X;Deamidation 18O (N);X;X;X;X;X;X;X;X;X;X;X;X;X;X;X
683	H3BUU9	Cadherin-11	CDH11	H3BUU9	0.887012	8.94895	4.18772e-06	107.75	80.249	107.75													0.878243	8.58119	0.000639577	88.551													0.887012	8.94895	4.18772e-06	107.75					N	PRFIFSLPPEIIHNPNFTVRDNRDNTAGVYA	X;X;X;X;X;X;X;X;X;X;X;X;X;X;X;Deamidation 18O (N);X;X;X;X;X;X;X;X;X;X;X;X;X;X;X
684	B4DN67	Kin of IRRE-like protein 1 (cDNA FLJ56360, highly similar to Kin of IRRE-like protein 1)	KIRREL1	B4DN67	1	77.221	0.0020835	77.221	62.451	77.221													1	77.221	0.0020835	77.221																					N	IDGGPVILLQAGTPHNLTCRAFNAKPAATII	X;X;X;X;X;X;X;X;X;X;X;X;X;X;X;Deamidation 18O (N);X;X;X;X;X;X;X;X;X;X;X;X;X;X;X
685	G3XAP6	Cartilage oligomeric matrix protein (Cartilage oligomeric matrix protein, isoform CRA_b)	COMP hCG_37043	B4DN75;G3XAP6;Q53FR6	1	121.107	1.31291e-298	323.61	320.97	217.29	1	121.107	1.31291e-298	323.61	0.999991	50.3247	6.21269e-131	244.21	1	105.509	2.55524e-71	192.93	1	72.1883	4.37918e-94	221.26	1	74.6223	3.53047e-77	202.74	1	76.7246	2.06817e-71	193.81	1	118.689	1.43451e-84	210.31	1	110.655	3.50572e-78	206.32	1	90.4347	7.35244e-68	187.16	N	ESGARCGPCPAGFTGNGSHCTDVNECNAHPC	X;X;X;X;X;X;X;X;X;X;X;X;X;X;X;Deamidation 18O (N);X;X;X;X;X;X;X;X;X;X;X;X;X;X;X
686	G3XAP6	Cartilage oligomeric matrix protein (Cartilage oligomeric matrix protein, isoform CRA_b)	COMP hCG_37043	B4DN75;G3XAP6;Q53FR6	1	130.27	2.4741e-156	290.28	277.65	130.27	1	88.1627	6.56608e-12	149.23	1	89.2612	6.94128e-29	210.95	1	130.27	2.45273e-22	199.7	1	179.552	8.1673e-47	226.42	1	87.7194	0.000839958	87.719	1	134.99	2.26021e-13	134.99	1	164.932	5.51385e-14	164.93	1	79.8103	2.4741e-156	290.28	1	166.864	5.92584e-14	166.86	N	FSQENIIWANLRYRCNDTIPEDYETHQLRQA	X;X;X;X;X;X;X;X;X;X;X;X;X;X;X;Deamidation 18O (N);X;X;X;X;X;X;X;X;X;X;X;X;X;X;X
687	G3XAP6	Cartilage oligomeric matrix protein (Cartilage oligomeric matrix protein, isoform CRA_b)	COMP hCG_37043	B4DN75;G3XAP6	1	131.02	2.64935e-38	131.02	129.21	131.02																									1	131.02	2.64935e-38	131.02									N	GDGIGDACDNCPQKSNPDQADVDHDFVGDAC	X;X;X;X;X;X;X;X;X;X;X;X;X;X;X;Deamidation 18O (N);X;X;X;X;X;X;X;X;X;X;X;X;X;X;X
688	B4DNB1	cDNA FLJ52001, highly similar to SPARC-related modular calcium-binding protein 2 (cDNA, FLJ78819, highly similar to SPARC-related modular calcium-binding protein 2)		B4DNB1	1	221.445	9.01742e-26	221.44	131.9	221.44					1	147.909	3.97497e-05	147.91																	1	174.226	6.21044e-05	174.23					1	221.445	9.01742e-26	221.44	N	LEERVVHWYFKLLDKNSSGDIGKKEIKPFKR	X;X;X;X;X;X;X;X;X;X;X;X;X;X;X;Deamidation 18O (N);X;X;X;X;X;X;X;X;X;X;X;X;X;X;X
689	B4DNE0	cDNA FLJ52573, highly similar to Elongation factor 1-alpha 1		B4DNE0	0.997991	27.0183	0.0224642	48.568	28.187	48.568					0.997991	27.0183	0.0224642	48.568																													N	AGVGEFEAGISKNGDNMLEPSANMPWFKGWK	X;X;X;X;X;X;X;X;X;X;X;X;X;X;X;Deamidation 18O (N);Oxidation (M);X;X;X;X;X;Deamidation 18O (N);X;X;X;X;X;X;X;X
690	B4DNE0	cDNA FLJ52573, highly similar to Elongation factor 1-alpha 1		B4DNE0	0.999964	47.4843	0.0224642	48.568	28.187	48.568					0.999964	47.4843	0.0224642	48.568																													N	AGISKNGDNMLEPSANMPWFKGWKVTRKDGN	X;X;X;X;X;X;X;X;Deamidation 18O (N);Oxidation (M);X;X;X;X;X;Deamidation 18O (N);X;X;X;X;X;X;X;X;X;X;X;X;X;X;X
691	B4DNG0	Olfactomedin-like protein 3 (cDNA FLJ58142, highly similar to Olfactomedin-like protein 3)	OLFML3	B4DNG0	1	130.509	2.03812e-07	142.14	93.902	130.51					1	130.509	2.03812e-07	142.14																	1	78.1557	0.0463194	78.156					1	130.509	0.000873791	130.51	N	GEMENTLQLIKFHLANRTVVDSSVFPAEGLI	X;X;X;X;X;X;X;X;X;X;X;X;X;X;X;Deamidation 18O (N);X;X;X;X;X;X;X;X;X;X;X;X;X;X;X
692	B4DNG0	Olfactomedin-like protein 3 (cDNA FLJ58142, highly similar to Olfactomedin-like protein 3)	OLFML3	B4DNG0	1	213.591	1.44229e-196	305.6	276.06	213.59	1	171.322	7.37945e-53	171.32	1	176.051	9.93489e-21	176.05	1	154.357	3.93545e-21	154.36	1	126.765	3.22405e-189	305.6	1	160.15	9.5274e-22	179.6	1	155.151	5.83577e-53	213.16	1	275.951	1.44229e-196	275.95	1	111.63	4.44695e-67	238.92	1	213.591	2.18838e-111	267.17	N	PLGQTEKIYVLDGTQNDTAFVFPRLRDFTLA	X;X;X;X;X;X;X;X;X;X;X;X;X;X;X;Deamidation 18O (N);X;X;X;X;X;X;X;X;X;X;X;X;X;X;X
693	B4DNM8	cDNA FLJ53395, highly similar to Prolyl 3-hydroxylase 1		B4DNM8	1	73.4642	1.15771e-58	238.47	196.47	73.464																					1	101.009	0.00107762	101.01					1	115.384	1.15771e-58	238.47	1	73.4642	0.00457784	73.464	N	GQEGKVPLQSAHLYYNVTEKVRRIMESYFRL	X;X;X;X;X;X;X;X;X;X;X;X;X;X;X;Deamidation 18O (N);X;X;X;X;X;X;X;X;X;X;X;X;X;X;X
694	Q6LEP5	TIMP-3 (Fragment)		Q6LEP5	1	105.808	0.0213874	105.81	74.505	105.81									1	77.9225	0.0452637	77.923													1	105.808	0.0213874	105.81									N	_________PDKSIINATDP___________	X;X;X;X;X;X;X;X;X;X;X;X;X;X;X;Deamidation 18O (N);X;X;X;X;X;X;X;X;X;X;X;X;X;X;X
695	H3BQ21	Signal-regulatory protein beta-1 (Fragment)	SIRPB1	H3BQ21	1	140.463	4.84205e-114	238.51	193.65	238.51					0.999998	57.2459	9.53538e-05	129.89					1	78.0677	1.73728e-05	167.12	0.999929	41.5161	0.0376683	69.721	0.99989	39.5792	0.0141192	79.201	1	108.444	4.84205e-114	218.11	1	114.177	5.67951e-13	202.57	1	140.463	2.01058e-46	238.51	N	TLEVTQQPVRAENQVNVTCQVRKFYPQRLQL	X;X;X;X;X;X;X;X;X;X;X;X;X;X;X;Deamidation 18O (N);X;X;X;X;X;X;X;X;X;X;X;X;X;X;X
696	H3BQ21	Signal-regulatory protein beta-1 (Fragment)	SIRPB1	H3BQ21	1	148.523	0.000886076	148.52	113.7	148.52					1	72.2432	0.0323799	72.243					1	148.523	0.000886076	148.52																					N	VAHVTLQGDPLRGTANLSETIRVPPTLEVTQ	X;X;X;X;X;X;X;X;X;X;X;X;X;X;X;Deamidation 18O (N);X;X;X;X;X;X;X;X;X;X;X;X;X;X;X
697	B4DPP8	cDNA FLJ53075, highly similar to Kininogen-1		B4DPP8	0.550626	1.57169	1.8342e-150	276.77	248.35	276.77													0.550626	1.57169	1.8342e-150	276.77																					N	SPDLEPILRHGIQYFNNNTQHSSLFMLNEVK	X;X;X;X;X;X;X;X;X;X;X;X;X;X;X;Deamidation 18O (N);X;X;X;X;X;X;X;X;X;X;X;X;X;X;X
698	Q05CF8	KNG1 protein	KNG1	B4DPP8;Q05CF8	1	171.853	4.47273e-37	199.09	149.05	171.85	1	129.156	0.000113028	129.16	1	138.25	0.0015305	138.25	1	158.79	9.50993e-06	158.79	1	199.089	4.47273e-37	199.09	1	121.899	0.000492799	121.9	1	182.638	2.50096e-06	182.64	1	182.71	2.46995e-06	182.71	1	197.063	9.5154e-10	197.06	1	171.853	1.72523e-05	171.85	N	VAGLNFRITYSIVQTNCSKENFLFLTPDCKS	X;X;X;X;X;X;X;X;X;X;X;X;X;X;X;Deamidation 18O (N);X;X;X;X;X;X;X;X;X;X;X;X;X;X;X
699	Q05CF8	KNG1 protein	KNG1	B4DPP8;Q05CF8	0.950592	12.842	6.9084e-22	208.63	163.88	208.63	0.819333	6.56581	6.85549e-16	151.22	0.894801	9.29713	6.9084e-22	157.24					0.950592	12.842	1.66976e-18	208.63	0.819203	6.56201	2.3338e-05	132.88	0.868572	8.20119	1.08663e-05	161.17	0.90415	9.74646	9.88372e-06	175.93	0.867465	8.15922	8.38759e-06	156.48	0.842303	7.27646	6.99155e-06	150.1	N	EETLTHTITKLNAENNATFYFKIDNVKKARV	X;X;X;X;X;X;X;X;X;X;X;X;X;X;X;Deamidation 18O (N);X;X;X;X;X;X;X;X;X;X;X;X;X;X;X
700	B4DQZ0	cDNA FLJ57066, highly similar to Collagen alpha-1(XI) chain		B4DQZ0	1	212.554	1.03819e-36	212.55	199.19	212.55													1	196.577	8.77174e-26	196.58					1	117.916	3.57038e-06	117.92	1	169.17	2.68722e-20	169.17	1	212.554	1.03819e-36	212.55					N	DPNQGCSGDSFKVYCNFTSGGETCIYPDKKS	X;X;X;X;X;X;X;X;X;X;X;X;X;X;X;Deamidation 18O (N);X;X;X;X;X;X;X;X;X;X;X;X;X;X;X
701	F8WCU2	Peptidyl-prolyl cis-trans isomerase FKBP7	FKBP7	F8WCU2	1	79.4662	3.59195e-06	148.13	106.13	79.466	1	70.4119	0.0157543	70.412	1	128.363	5.81121e-05	128.36	1	90.7928	0.0029341	90.793	1	105.649	0.00201769	105.65	1	90.9258	0.00292369	90.926	1	97.1207	0.0024519	97.121	1	124.857	9.52863e-05	124.86	1	148.129	3.59195e-06	148.13	1	79.4662	0.0103747	79.466	N	ESTEEVKIEVLHRPENCSKTSKKGDLLNAHY	X;X;X;X;X;X;X;X;X;X;X;X;X;X;X;Deamidation 18O (N);X;X;X;X;X;X;X;X;X;X;X;X;X;X;X
702	H0Y928	Thioredoxin domain-containing protein 15 (Fragment)	TXNDC15	H0Y928	1	93.0578	0.00475409	104.22	67.775	93.058																													1	93.0578	0.00475409	104.22					N	NHTDRTLETLKIFIFNQTGIEAKKNVVVTQA	X;X;X;X;X;X;X;X;X;X;X;X;X;X;X;Deamidation 18O (N);X;X;X;X;X;X;X;X;X;X;X;X;X;X;X
703	B4DS89	cDNA FLJ53091, highly similar to GDNF family receptor alpha-2		B4DS89	0.676907	3.21201	0.000311621	83.53	51.007	83.53																									0.676907	3.21201	0.000311621	83.53									N	FTENPCLRNAIQAFGNGTDVNVSPKGPSFQA	X;X;X;X;X;X;X;X;X;X;X;X;X;X;X;Deamidation 18O (N);X;X;X;X;X;X;X;X;X;X;X;X;X;X;X
704	B4DTY8	cDNA FLJ61587, highly similar to Integrin alpha-1 (Fragment)		B4DTY8	0.987097	18.8366	0.00292369	90.926	77.522	90.926													0.987097	18.8366	0.00292369	90.926																					N	SGIEAIQKDSCESNHNITCKVGYPFLRRGEM	X;X;X;X;X;X;X;X;X;X;X;X;X;X;X;Deamidation 18O (N);X;X;X;X;X;X;X;X;X;X;X;X;X;X;X
705	B4DTY8	cDNA FLJ61587, highly similar to Integrin alpha-1 (Fragment)		B4DTY8	1	190.339	1.50554e-17	190.34	156.47	190.34													1	129.707	2.55241e-05	129.71													1	190.339	1.50554e-17	190.34					N	GRGESLPCVKLDLPVNTSIPNVTEVKENMTF	X;X;X;X;X;X;X;X;X;X;X;X;X;X;X;Deamidation 18O (N);X;X;X;X;Deamidation 18O (N);X;X;X;X;X;X;X;X;X;X
706	B4DTY8	cDNA FLJ61587, highly similar to Integrin alpha-1 (Fragment)		B4DTY8	1	190.339	1.50554e-17	190.34	156.47	190.34													1	129.707	2.55241e-05	129.71													1	190.339	1.50554e-17	190.34					N	LPCVKLDLPVNTSIPNVTEVKENMTFGSTLV	X;X;X;X;X;X;X;X;X;X;Deamidation 18O (N);X;X;X;X;Deamidation 18O (N);X;X;X;X;X;X;X;X;X;X;X;X;X;X;X
707	B4DTY8	cDNA FLJ61587, highly similar to Integrin alpha-1 (Fragment)		B4DTY8	1	64.8188	1.74276e-91	249.14	232.55	249.14													0.99999	50.8314	3.7907e-91	245.1					0.999603	34.8377	7.90117e-20	148.38	1	64.8188	1.74276e-91	249.14	0.999999	59.3578	5.75132e-66	228.85					N	IGPKQTQVGIVQYGENVTHEFNLNKYSSTEE	X;X;X;X;X;X;X;X;X;X;X;X;X;X;X;Deamidation 18O (N);X;X;X;X;X;X;X;X;X;X;X;X;X;X;X
708	B4DTY8	cDNA FLJ61587, highly similar to Integrin alpha-1 (Fragment)		B4DTY8	1	164.791	1.17289e-10	186.36	166.07	186.36													1	164.791	1.17289e-10	186.36	1	139.672	2.23902e-09	158.42	1	114.759	5.45127e-05	128.57													N	FSSLNLTIRGGLRSENASLVLSSSNQKRELA	X;X;X;X;X;X;X;X;X;X;X;X;X;X;X;Deamidation 18O (N);X;X;X;X;X;X;X;X;X;X;X;X;X;X;X
709	B4DTY8	cDNA FLJ61587, highly similar to Integrin alpha-1 (Fragment)		B4DTY8	1	87.3076	0.014072	89.247	40.451	87.308													1	89.2472	0.014072	89.247	1	78.3345	0.0208092	78.334									1	87.3076	0.0144522	87.308					N	GTEKEEQGKVYVYALNQTRFEYQMSLEPIKQ	X;X;X;X;X;X;X;X;X;X;X;X;X;X;X;Deamidation 18O (N);X;X;X;X;X;X;X;X;X;X;X;X;X;X;X
710	B4DTY8	cDNA FLJ61587, highly similar to Integrin alpha-1 (Fragment)		B4DTY8	1	83.0451	1.49845e-05	135.8	110.96	83.045					1	60.2551	0.0242696	60.255					1	84.0541	1.49845e-05	135.8	1	84.8173	0.0042879	84.817	1	83.0451	0.0042879	83.045													N	ASSGDVLYIAGQPRYNHTGQVIIYRMEDGNI	X;X;X;X;X;X;X;X;X;X;X;X;X;X;X;Deamidation 18O (N);X;X;X;X;X;X;X;X;X;X;X;X;X;X;X
711	B4DTZ8	cDNA FLJ52277, highly similar to Follistatin-related protein 1		B4DTZ8	1	83.3579	0.0131398	92.051	71.426	83.358													1	92.0512	0.0131398	92.051													1	83.3579	0.0174281	83.358					N	LEAEIIPDGWFSKGSNYSEILDKYFKNFDNG	X;X;X;X;X;X;X;X;X;X;X;X;X;X;X;Deamidation 18O (N);X;X;X;X;X;X;X;X;X;X;X;X;X;X;X
712	E9PJ35	Translocon-associated protein subunit beta	SSR2	E9PJ35	1	128.896	2.84007e-20	151.9	140.62	128.9					1	118.47	1.44172e-06	118.47	1	98.5073	0.000773469	98.507	1	151.902	2.84007e-20	151.9	1	43.9546	0.0318265	43.955	1	92.5753	0.000794182	92.575	1	89.4845	3.07532e-05	89.484	1	128.896	6.13836e-08	128.9					N	SGMLNVKWDRIAPASNVSHTVVLRPLKAGYF	X;X;X;X;X;X;X;X;X;X;X;X;X;X;X;Deamidation 18O (N);X;X;X;X;X;X;X;X;X;X;X;X;X;X;X
713	F6SDV2	Tubulointerstitial nephritis antigen-like (Tubulointerstitial nephritis antigen-like 1, isoform CRA_a)	TINAGL1 hCG_41620	F6SDV2	0.840072	10.0616	0.0130849	41.188	34.313	41.188																													0.840072	10.0616	0.0130849	41.188					N	MIKAINQGNYGWQAGNHSAFWGMTLDEGIRY	X;X;X;X;X;X;X;X;X;X;X;X;X;X;X;Deamidation 18O (N);X;X;X;X;X;X;X;X;X;X;X;X;X;X;X
714	Q92791	Endoplasmic reticulum protein SC65 (Leprecan-like protein 4) (Nucleolar autoantigen No55) (Prolyl 3-hydroxylase family member 4) (Synaptonemal complex protein SC65)	P3H4 LEPREL4 NOL55 SC65	Q92791	1	184.762	2.36182e-53	184.76	181.42	184.76													1	136.402	1.13595e-21	136.4																	1	184.762	2.36182e-53	184.76	N	RLHRLLRDSEAFCHANCSGPAPAAKPDPDGG	X;X;X;X;X;X;X;X;X;X;X;X;X;X;X;Deamidation 18O (N);X;X;X;X;X;X;X;X;X;X;X;X;X;X;X
715	Q92791	Endoplasmic reticulum protein SC65 (Leprecan-like protein 4) (Nucleolar autoantigen No55) (Prolyl 3-hydroxylase family member 4) (Synaptonemal complex protein SC65)	P3H4 LEPREL4 NOL55 SC65	Q92791	1	132.857	1.82925e-17	203.39	173.06	132.86													1	203.395	1.82925e-17	203.39	1	55.6556	0.0263633	55.656	1	98.582	0.00156557	98.582	1	135.814	2.65639e-07	135.81	1	152.992	7.19082e-10	152.99	1	132.857	6.85952e-09	132.86	N	EEEDFQPREEAMLYHNQTAELRELLEFTHMY	X;X;X;X;X;X;X;X;X;X;X;X;X;X;X;Deamidation 18O (N);X;X;X;X;X;X;X;X;X;X;X;X;X;X;X
716	B4DX19	cDNA FLJ57644, highly similar to Serum paraoxonase/arylesterase 1		B4DX19	1	213.307	4.11406e-22	218.47	176.81	213.31													1	218.466	4.11406e-22	218.47					1	190.962	4.42449e-06	190.96	1	198.717	9.57082e-10	198.72	1	213.307	2.01993e-15	213.31	1	213.307	2.01993e-15	213.31	N	AELLAHKIHVYEKHANWTLTPLKSLDFNTLV	X;X;X;X;X;X;X;X;X;X;X;X;X;X;X;Deamidation 18O (N);X;X;X;X;X;X;X;X;X;X;X;X;X;X;X
717	B4DX19	cDNA FLJ57644, highly similar to Serum paraoxonase/arylesterase 1		B4DX19	1	268.932	2.29569e-294	334.04	269.39	268.93					1	162.41	2.46282e-38	162.41					1	43.3802	2.29569e-294	334.04																	1	268.932	6.3519e-270	268.93	N	NILTEEPKVTQVYAENGTVLQGSTVASVYKG	X;X;X;X;X;X;X;X;X;X;X;X;X;X;X;Deamidation 18O (N);X;X;X;X;X;X;X;X;X;X;X;X;X;X;X
718	B4DZ36	cDNA FLJ58441, highly similar to Attractin		B4DZ36	1	144.289	8.6495e-12	144.29	125.88	144.29													1	144.289	8.6495e-12	144.29																					N	STGNVTNELRVFHIHNESWVLLTPKAKEQYA	X;X;X;X;X;X;X;X;X;X;X;X;X;X;X;Deamidation 18O (N);X;X;X;X;X;X;X;X;X;X;X;X;X;X;X
719	E9PNH1	Neutral alpha-glucosidase AB (Fragment)	GANAB	E9PNH1	1	120.09	3.51981e-05	132.78	111.91	120.09	1	96.0149	0.0055662	96.015	1	125.747	5.14462e-05	125.75	1	132.779	3.51981e-05	132.78	1	120.09	0.000551844	120.09																					N	FEHQRAPRVSFSDKVNLTLGSIWDKIKNLFS	X;X;X;X;X;X;X;X;X;X;X;X;X;X;X;Deamidation 18O (N);X;X;X;X;X;X;X;X;X;X;X;X;X;X;X
720	B4DZA5	Anoctamin		B4DZA5	1	113.772	2.68513e-09	144.1	119.25	144.1													1	113.772	2.68513e-09	144.1	0.999492	32.9367	0.0401903	43.791	0.999994	52.4697	0.0162262	63.128					0.999996	54.3234	0.0136902	64.52					N	DFKNKSKGNPYSDLGNHTTCRYRDFRYPPGH	X;X;X;X;X;X;X;X;X;X;X;X;X;X;X;Deamidation 18O (N);X;X;X;X;X;X;X;X;X;X;X;X;X;X;X
721	E9PME7	SID1 transmembrane family member 2 (Fragment)	SIDT2	E9PME7	1	143.424	3.80258e-14	143.42	130.86	143.42													1	143.424	3.80258e-14	143.42																					N	RMDDFVLRTGEQFSFNTTAAQPQYFKYEFPE	X;X;X;X;X;X;X;X;X;X;X;X;X;X;X;Deamidation 18O (N);X;X;X;X;X;X;X;X;X;X;X;X;X;X;X
722	Q05CF8	KNG1 protein	KNG1	Q05CF8	0.587433	1.62151	1.22802e-169	281.58	246.2	281.58					0.49646	0	2.43933e-132	261.93					0.587433	1.62151	1.22802e-169	281.58					0.473998	0	5.91148e-66	216.82													N	YPDLEPILRHGIQYFNNNTQHSSLFTLNEVK	X;X;X;X;X;X;X;X;X;X;X;X;X;X;X;Deamidation 18O (N);X;X;X;X;X;X;X;X;X;X;X;X;X;X;X
723	Q05CF8	KNG1 protein	KNG1	Q05CF8	0.979584	16.8216	0	441.81	378.85	441.81					0.49646	0	2.43933e-132	261.93	0.735304	4.79221	2.41811e-39	174.63									0.473998	0	5.91148e-66	216.82	0.968071	17.8276	0	371.97	0.78955	6.03549	0	348.48	0.979584	16.8216	0	441.81	N	PDLEPILRHGIQYFNNNTQHSSLFTLNEVKR	X;X;X;X;X;X;X;X;X;X;X;X;X;X;X;Deamidation 18O (N);X;X;X;X;X;X;X;X;X;X;X;X;X;X;X
724	Q05CF8	KNG1 protein	KNG1	Q05CF8	0.530275	1.12197	5.45788e-09	122.94	115.83	122.94					0.391243	0.567833	0.00122116	83.606																					0.530275	1.12197	5.45788e-09	122.94					N	DLEPILRHGIQYFNNNTQHSSLFTLNEVKRA	X;X;X;X;X;X;X;X;X;X;X;X;X;X;X;Deamidation 18O (N);X;X;X;X;X;X;X;X;X;X;X;X;X;X;X
725	D3DP13	Fibrinogen beta chain, isoform CRA_e	FGB hCG_2026446	D3DP13	1	119.291	0.000853357	119.29	107.06	119.29													1	119.291	0.000853357	119.29																					N	PRKQCSKEDGGGWWYNRCHAANPNGRYYWGG	X;X;X;X;X;X;X;X;X;X;X;X;X;X;X;Deamidation 18O (N);X;X;X;X;X;X;X;X;X;X;X;X;X;X;X
726	D3DP13	Fibrinogen beta chain, isoform CRA_e	FGB hCG_2026446	D3DP13	1	315.912	0	362.79	342.41	343.97													1	241.282	4.62954e-225	299.27	1	155.76	1.41996e-28	167.37	1	337.07	0	362.79	1	298.361	0	343.54	1	315.912	0	343.97	1	143.333	1.08765e-28	170.74	N	AGNALMDGASQLMGENRTMTIHNGMFFSTYD	X;X;X;X;X;Oxidation (M);X;X;X;X;X;X;Oxidation (M);X;X;Deamidation 18O (N);X;X;X;X;X;X;X;X;X;X;X;X;X;X;X
727	D3DP13	Fibrinogen beta chain, isoform CRA_e	FGB hCG_2026446	D3DP13	0.999927	41.3961	1.02224e-247	297.97	268.63	297.97													0.999927	41.3961	1.02224e-247	297.97																					N	SSELEKHQLYIDETVNSNIPTNLRVLRSILE	X;X;X;X;X;X;X;X;X;X;X;X;X;X;X;Deamidation 18O (N);X;X;X;X;X;X;X;X;X;X;X;X;X;X;X
728	D3DP13	Fibrinogen beta chain, isoform CRA_e	FGB hCG_2026446	D3DP13	0.967498	14.7382	2.65402e-06	104.51	98.284	104.51													0.967498	14.7382	2.65402e-06	104.51																					N	YKQGFGNVATNTDGKNYCGLPGEYWLGNDKI	X;X;X;X;X;X;X;X;X;X;X;X;X;X;X;Deamidation 18O (N);X;X;X;X;X;X;X;X;X;X;X;X;X;X;X
729	B4E1I8	cDNA FLJ54228, highly similar to Leucine-rich alpha-2-glycoprotein		B4E1I8	1	125.226	9.30158e-09	147.91	106.46	125.23													1	134.592	1.94623e-06	134.59									1	108.697	0.00288938	108.7	1	147.909	9.30158e-09	147.91	1	125.226	0.000208511	125.23	N	LSGNRLRKLPPGLLANFTLLRTLDLGENQLE	X;X;X;X;X;X;X;X;X;X;X;X;X;X;X;Deamidation 18O (N);X;X;X;X;X;X;X;X;X;X;X;X;X;X;X
730	B4E1I8	cDNA FLJ54228, highly similar to Leucine-rich alpha-2-glycoprotein		B4E1I8	1	97.0329	0.0033509	150.84	137.26	97.033					1	150.837	0.00350294	150.84	1	135.843	0.00347814	135.84	1	138.895	0.0033509	138.9													1	114.783	0.0033509	138.9	1	97.0329	0.0232663	97.033	N	LYRWLQAQKDKMFSQNDTRCAGPEAVKGQTL	X;X;X;X;X;X;X;X;X;X;X;Oxidation (M);X;X;X;Deamidation 18O (N);X;X;X;X;X;X;X;X;X;X;X;X;X;X;X
731	B4E1T4	cDNA FLJ53955, highly similar to Secreted frizzled-related protein 4		B4E1T4	1	96.2529	0.0178056	102.41	90.214	96.253	1	74.1273	0.0408906	74.127									1	102.407	0.0178056	102.41									1	73.2482	0.0424567	73.248	1	82.4525	0.0291838	82.452	1	96.2529	0.0207946	96.253	N	PCEAVRIPMCRHMPWNITRMPNHLHHSTQEN	X;X;X;X;X;X;X;X;X;X;X;X;X;X;X;Deamidation 18O (N);X;X;X;X;X;X;X;X;X;X;X;X;X;X;X
732	B4E1T4	cDNA FLJ53955, highly similar to Secreted frizzled-related protein 4		B4E1T4	1	134.318	4.31298e-31	182.39	174.49	134.32	1	77.6306	0.00198255	77.631	1	99.0592	0.000789856	99.059	1	47.1549	0.0230398	47.155	1	83.0632	2.69108e-08	118.52									1	173.556	1.89258e-29	173.56	1	182.391	4.31298e-31	182.39	1	134.318	1.10095e-14	138.03	N	CQRARDDCEPLMKMYNHSWPESLACDELPVY	X;X;X;X;X;X;X;X;X;X;X;X;X;X;X;Deamidation 18O (N);X;X;X;X;X;X;X;X;X;X;X;X;X;X;X
733	B4E216	cDNA FLJ57339, highly similar to Complement C3		B4E216	1	65.6768	0.000731805	74.769	54.106	73.21													0.999998	56.3115	0.00336096	74.769																	1	65.6768	0.000731805	73.21	N	KLVLSSEKTVLTPATNHMGNVTFTIPANREF	X;X;X;X;X;X;X;X;X;X;X;X;X;X;X;Deamidation 18O (N);X;X;X;Deamidation 18O (N);X;X;X;X;X;X;X;X;X;X;X
734	B4E216	cDNA FLJ57339, highly similar to Complement C3		B4E216	1	93.067	0	370.44	333.01	326.09	0.996789	25.007	6.15044e-15	134.9	0.999993	51.8522	1.64349e-34	190.24	0.986719	18.7105	2.74421e-15	139.11	0.999816	37.4326	3.90551e-30	175.73	0.997277	25.639	1.42032e-19	145.75	0.999843	38.0437	1.78773e-31	180.83	0.999546	33.5323	1.65073e-29	161.58	1	83.0969	0	370.44	1	93.067	4.71734e-280	326.09	N	SSEKTVLTPATNHMGNVTFTIPANREFKSEK	X;X;X;X;X;X;X;X;X;X;X;Deamidation 18O (N);X;Oxidation (M);X;Deamidation 18O (N);X;X;X;X;X;X;X;X;X;X;X;X;X;X;X
735	B4E282	cDNA FLJ52401, highly similar to Integrin alpha-10		B4E282	1	136.163	2.90292e-86	265.55	216.13	265.55	0.999998	56.3206	0.00026494	123.88	1	75.4436	1.08663e-05	161.17	0.999996	53.7799	0.000146577	127.76													1	123.502	4.82963e-59	248.68	1	110.355	1.67544e-18	208.6	1	136.163	2.90292e-86	265.55	N	GPPVHPEELQHTNRLNGSNTQCQVVRCHLGQ	X;X;X;X;X;X;X;X;X;X;X;X;X;X;X;Deamidation 18O (N);X;X;X;X;X;X;X;X;X;X;X;X;X;X;X
736	Q6WN33	Chordin-like protein 2 (Chordin-related protein 2 variant III) (Fragment)	CHRDL2 CHL2	Q6WN33	1	133.149	2.56416e-45	189.94	180.48	133.15	1	189.942	2.56416e-45	189.94																													1	133.149	3.74134e-15	133.15	N	HTPSGLRAPPKSCQHNGTMYQHGEIFSAHEL	X;X;X;X;X;X;X;X;X;X;X;X;X;X;X;Deamidation 18O (N);X;X;Oxidation (M);X;X;X;X;X;X;X;X;X;X;X;X
737	B4E367	cDNA FLJ61564, highly similar to Plexin domain-containing protein 2		B4E367	0.977815	16.442	2.63435e-200	284.9	267.67	284.9																									0.802941	6.10088	2.21115e-57	164.39	0.977815	16.442	2.63435e-200	284.9					N	EPRSFTDLLLDDGQDNNTQIEEDTDHNYYIS	X;X;X;X;X;X;X;X;X;X;X;X;X;X;X;Deamidation 18O (N);X;X;X;X;X;X;X;X;X;X;X;X;X;X;X
738	B4E3G9	cDNA FLJ61084, highly similar to Angiopoietin-1		B4E3G9	1	95.0183	0.00375287	95.018	76.273	95.018													1	95.0183	0.00375287	95.018																					N	AEQTRKLTDVETQVLNQTSRLEIQLLENSLS	X;X;X;X;X;X;X;X;X;X;X;X;X;X;X;Deamidation 18O (N);X;X;X;X;X;X;X;X;X;X;X;X;X;X;X
739	B4E3S3	cDNA FLJ56673, highly similar to Homo sapiens adipocyte-specific adhesion molecule (ASAM), mRNA		B4E3S3	0.5	0	3.35979e-05	134.68	120.47	134.68																					0.5	0	3.35979e-05	134.68													N	GNQKVVITYSSRHVYNNLTEEQKGRVAFASN	X;X;X;X;X;X;X;X;X;X;X;X;X;X;X;Deamidation 18O (N);X;X;X;X;X;X;X;X;X;X;X;X;X;X;X
740	B4E3S3	cDNA FLJ56673, highly similar to Homo sapiens adipocyte-specific adhesion molecule (ASAM), mRNA		B4E3S3	0.981969	17.3609	2.34914e-80	217.45	191.56	217.45													0.981969	17.3609	1.27158e-25	217.45					0.5	0	3.35979e-05	134.68									0.953603	13.1287	2.34914e-80	200.68	N	NQKVVITYSSRHVYNNLTEEQKGRVAFASNF	X;X;X;X;X;X;X;X;X;X;X;X;X;X;X;Deamidation 18O (N);X;X;X;X;X;X;X;X;X;X;X;X;X;X;X
741	C9J6F5	Vitrin	VIT	C9J6F5	1	86.0142	3.36702e-05	134.84	72.882	86.014	1	123.957	9.30217e-05	123.96	1	134.844	3.36702e-05	134.84	1	103.312	0.00457891	103.31	1	76.1427	0.0303588	76.143	1	97.5967	0.00629039	97.597	1	128.811	5.09032e-05	128.81					1	87.2981	0.00525354	87.298	1	86.0142	0.00661144	86.014	N	SVGTGNFRTVLQFVTNLTKEFEISDTDTRIG	X;X;X;X;X;X;X;X;X;X;X;X;X;X;X;Deamidation 18O (N);X;X;X;X;X;X;X;X;X;X;X;X;X;X;X
742	B5MEF5	Sushi, nidogen and EGF-like domain-containing protein 1	SNED1	B5MEF5	1	156.362	4.17565e-27	156.36	138.5	156.36													1	72.1749	0.00521782	72.175	1	64.6498	0.012106	64.65	1	66.7969	0.00952451	66.797	1	125.975	1.5302e-05	125.97					1	156.362	4.17565e-27	156.36	N	CFSSPCGGRGYCLASNGSHSCTCKVGYTGED	X;X;X;X;X;X;X;X;X;X;X;X;X;X;X;Deamidation 18O (N);X;X;X;X;X;X;X;X;X;X;X;X;X;X;X
743	B7Z236	cDNA FLJ54304, highly similar to Cadherin-13		B7Z236	1	125.918	8.75146e-27	151.33	136.92	151.33													1	125.918	8.75146e-27	151.33					0.999932	44.5572	0.0148769	47.237	1	118.815	1.38394e-20	140.66	1	102.652	3.31334e-09	122.41	1	94.6513	0.000110542	103.67	N	NLPIMVTDSGKPPMTNITDLRVQVCSCRNSK	X;X;X;X;X;X;X;X;X;X;X;X;X;Oxidation (M);X;Deamidation 18O (N);X;X;X;X;X;X;X;X;X;X;X;X;X;X;X
744	B7Z236	cDNA FLJ54304, highly similar to Cadherin-13		B7Z236	1	111.83	0	383.26	359.3	383.26													1	111.83	0	383.26									1	85.0286	2.81266e-57	208.39	1	82.0399	4.74637e-294	331.4	1	63.8401	8.49287e-170	285.43	N	SVYKDPAGWLNINPINGTVDTTAVLDRESPF	X;X;X;X;X;X;X;X;X;X;X;X;X;X;X;Deamidation 18O (N);X;X;X;X;X;X;X;X;X;X;X;X;X;X;X
745	B7Z236	cDNA FLJ54304, highly similar to Cadherin-13		B7Z236	0.993473	21.8247	1.5794e-14	170.91	147.35	170.91													0.914347	10.2837	4.53444e-07	132.59	0.499996	0	0.0253558	51.495					0.982129	17.4002	1.5794e-14	166.62	0.993473	21.8247	1.61464e-14	170.91	0.993473	21.8247	1.61464e-14	170.91	N	HKQAVPDKVWKISKINNTHALVSLLQNLNKA	X;X;X;X;X;X;X;X;X;X;X;X;X;X;X;Deamidation 18O (N);X;X;X;X;X;X;X;X;X;X;X;X;X;X;X
746	B7Z236	cDNA FLJ54304, highly similar to Cadherin-13		B7Z236	0.668452	3.04524	0.000887943	99.711	79.891	99.711																	0.499996	0	0.0253558	51.495	0.668452	3.04524	0.000887943	99.711													N	KQAVPDKVWKISKINNTHALVSLLQNLNKAN	X;X;X;X;X;X;X;X;X;X;X;X;X;X;X;Deamidation 18O (N);X;X;X;X;X;X;X;X;X;X;X;X;X;X;X
747	B7Z236	cDNA FLJ54304, highly similar to Cadherin-13		B7Z236	1	78.692	1.01868e-05	160.18	102.59	78.692													1	160.183	1.01868e-05	160.18	1	80.0144	0.0269446	80.014	1	91.9373	0.00761752	91.937	1	130.006	9.25293e-05	130.01	1	141.084	1.16566e-05	141.08	1	78.692	0.00941421	89.403	N	PFIYPTVAEVCDDAKNLSVVILGASDKDLHP	X;X;X;X;X;X;X;X;X;X;X;X;X;X;X;Deamidation 18O (N);X;X;X;X;X;X;X;X;X;X;X;X;X;X;X
748	B7Z236	cDNA FLJ54304, highly similar to Cadherin-13		B7Z236	1	178.946	9.64354e-53	178.95	167.94	178.95													1	178.946	9.64354e-53	178.95																					N	TRQEDLSVGSVLLTVNATDPDSLQHQTIRYS	X;X;X;X;X;X;X;X;X;X;X;X;X;X;X;Deamidation 18O (N);X;X;X;X;X;X;X;X;X;X;X;X;X;X;X
749	Q49A61	MST1 protein	MST1	Q49A61	1	248.206	4.33128e-169	298.84	197.38	248.21					1	116.546	0.000482819	116.55	1	94.6162	0.0037534	94.616	1	257.132	1.02038e-78	257.13	1	90.6853	0.00375857	90.685	1	85.8127	0.00440691	85.813	1	298.843	4.33128e-169	298.84	1	244.003	5.02804e-65	244	1	248.206	2.56504e-65	248.21	N	VSCFRGKGEGYRGTANTTTAGVPCQRWDAQI	X;X;X;X;X;X;X;X;X;X;X;X;X;X;X;Deamidation 18O (N);X;X;X;X;X;X;X;X;X;X;X;X;X;X;X
750	B7Z3E3	Reticulon		B7Z3E3	1	65.3952	0.0153452	65.395	37.534	65.395																													1	65.3952	0.0153452	65.395					N	SDCITKTTGLDMSEYNSEIPVVNLKTSTHQK	X;X;X;X;X;X;X;X;X;X;X;Oxidation (M);X;X;X;Deamidation 18O (N);X;X;X;X;X;X;Deamidation 18O (N);X;X;X;X;X;X;X;X
751	B7Z3E3	Reticulon		B7Z3E3	1	65.3952	0.0153452	65.395	37.534	65.395																													1	65.3952	0.0153452	65.395					N	TGLDMSEYNSEIPVVNLKTSTHQKTPVCSID	X;X;X;X;Oxidation (M);X;X;X;Deamidation 18O (N);X;X;X;X;X;X;Deamidation 18O (N);X;X;X;X;X;X;X;X;X;X;X;X;X;X;X
752	C9JGT6	Prenylcysteine oxidase 1 (Fragment)	PCYOX1	C9JGT6	1	71.2794	9.05096e-15	155.08	132.48	71.279	1	113.757	7.25405e-05	113.76	1	87.0009	0.00168957	87.001	1	117.704	2.5765e-05	117.7	1	59.2475	2.80139e-08	134.61	1	55.7239	0.0162595	55.724	1	62.2875	0.013981	62.287	1	77.7756	3.18275e-06	127.79	1	71.2794	2.44323e-12	143.98	1	155.084	9.05096e-15	155.08	N	KLLHALGGDDFLGMLNRTLLETLQKA_____	X;X;X;X;X;X;X;X;X;X;X;X;X;Oxidation (M);X;Deamidation 18O (N);X;X;X;X;X;X;X;X;X;X;X;X;X;X;X
753	B7Z4C9	cDNA FLJ59717, highly similar to T-brain-1 protein		B7Z4C9	1	71.0845	0.00311671	71.085	45.171	71.085																													1	71.0845	0.00311671	71.085					N	CWPNRAAAAARMAGANPYLGEEAEGLAAERS	X;X;X;X;X;X;X;X;X;X;X;X;X;X;X;Deamidation 18O (N);X;X;X;X;X;X;X;X;X;X;X;X;X;X;X
754	B7Z539	cDNA FLJ56954, highly similar to Inter-alpha-trypsin inhibitor heavy chain H1		B7Z539	1	179.21	3.01039e-05	193.86	122.52	179.21													1	146.81	0.0023659	146.81					1	84.7431	0.0233271	84.743	1	153.036	0.00243211	153.04	1	193.861	3.01039e-05	193.86	1	179.21	0.00202687	179.21	N	ELLAKRMKVDREVRANLSSQALRMSLDYGFV	X;X;X;X;X;X;X;X;X;X;X;X;X;X;X;Deamidation 18O (N);X;X;X;X;X;X;X;X;X;X;X;X;X;X;X
755	B7Z539	cDNA FLJ56954, highly similar to Inter-alpha-trypsin inhibitor heavy chain H1		B7Z539	0.992766	23.755	1.15745e-10	123.14	110.36	108.44																													0.985545	20.9152	1.15745e-10	123.14	0.992766	23.755	1.75938e-06	108.44	N	LLVANNHFAHFFAPQNLTNMNKNVVFVIDIS	X;X;X;X;X;X;X;X;X;X;X;X;X;X;X;Deamidation 18O (N);X;X;X;X;X;X;X;X;X;X;X;X;X;X;X
756	B7Z7D2	Lysosomal acid phosphatase (cDNA FLJ51131, highly similar to Lysosomal acid phosphatase)	ACP2	B7Z7D2	0.999969	45.1245	3.83431e-12	127.01	112.23	127.01													0.999969	45.1245	3.83431e-12	127.01																					N	LAGLFPPNGMQRFNPNISWQPIPVHTVPITE	X;X;X;X;X;X;X;X;X;X;X;X;X;X;X;Deamidation 18O (N);X;X;X;X;X;X;X;X;X;X;X;X;X;X;X
757	B7Z7D2	Lysosomal acid phosphatase (cDNA FLJ51131, highly similar to Lysosomal acid phosphatase)	ACP2	B7Z7D2	1	90.1082	4.67851e-05	129.85	97.101	90.108													1	123.625	0.000132345	123.63									1	129.851	4.67851e-05	129.85	1	111.057	0.00245827	111.06	1	90.1082	0.00522986	90.108	N	YEQLQNETRQTPEYQNESSRNAQFLDMVANE	X;X;X;X;X;Deamidation 18O (N);X;X;X;X;X;X;X;X;X;Deamidation 18O (N);X;X;X;X;X;X;X;X;X;X;X;X;X;X;X
758	B7Z7D2	Lysosomal acid phosphatase (cDNA FLJ51131, highly similar to Lysosomal acid phosphatase)	ACP2	B7Z7D2	1	100.756	0.000120206	142.92	89.756	100.76	1	120.155	0.00302149	120.15	1	125.817	0.000120206	125.82	1	115.714	0.00418209	115.71	1	142.923	0.00251617	142.92	1	82.7494	0.0241625	82.749	1	128.361	0.00191474	128.36	1	107.154	0.0104969	107.15					1	100.756	0.0149483	100.76	N	LKFPLGPCPRYEQLQNETRQTPEYQNESSRN	X;X;X;X;X;X;X;X;X;X;X;X;X;X;X;Deamidation 18O (N);X;X;X;X;X;X;X;X;X;Deamidation 18O (N);X;X;X;X;X
759	B7Z7D2	Lysosomal acid phosphatase (cDNA FLJ51131, highly similar to Lysosomal acid phosphatase)	ACP2	B7Z7D2	1	80.1016	0.000271962	119.53	102.59	80.102													1	119.528	0.000271962	119.53	1	74.9442	0.0127097	74.944	1	80.1016	0.00565681	80.102													N	WELGQALRQRYHGFLNTSYHRQEVYVRSTDF	X;X;X;X;X;X;X;X;X;X;X;X;X;X;X;Deamidation 18O (N);X;X;X;X;X;X;X;X;X;X;X;X;X;X;X
760	F5GX75	Vitronectin (Fragment)	VTN	F5GX75	1	50.7765	0	501.38	464.22	50.776	0.5	0	7.02349e-294	329.6	0.5	0	0	352.97	0.5	0	7.08206e-266	319.31	0.5	0	0	349.67	0.5	0	1.14172e-46	197.49	1	50.7765	1.73765e-150	274.91	0.5	0	0	501.38	0.5	0	0	429.05	0.5	0	0	420.4	N	MPEDEYTVYDDGEEKNNATVHEQVGGPSLTS	X;X;X;X;X;X;X;X;X;X;X;X;X;X;X;Deamidation 18O (N);Deamidation 18O (N);X;X;X;X;X;X;X;X;X;X;X;X;X;X
761	F5GX75	Vitronectin (Fragment)	VTN	F5GX75	1	50.7765	0	501.38	464.22	50.776	0.5	0	7.02349e-294	329.6	0.537613	0.654637	0	352.97	0.5	0	7.08206e-266	319.31	0.816642	6.48731	0	458.06	0.582792	1.45161	2.27027e-150	273.32	1	50.7765	1.73765e-150	274.91	0.5	0	0	501.38	0.5	0	0	429.05	0.5	0	0	420.4	N	PEDEYTVYDDGEEKNNATVHEQVGGPSLTSD	X;X;X;X;X;X;X;X;X;X;X;X;X;X;Deamidation 18O (N);Deamidation 18O (N);X;X;X;X;X;X;X;X;X;X;X;X;X;X;X
762	E7EQ29	Beta-galactosidase	GLB1	E7EQ29	1	101.082	0.00291974	109.66	83.28	109.66													1	101.082	0.00291974	109.66	0.999999	63.3523	0.0419721	68.893																	N	GIPQGVLERNNVITLNITGKAGATLDLLVEN	X;X;X;X;X;X;X;X;X;X;X;X;X;X;X;Deamidation 18O (N);X;X;X;X;X;X;X;X;X;X;X;X;X;X;X
763	B7Z5I3	cDNA FLJ59593		B7Z5I3	1	140.184	7.06801e-80	243.53	211.68	243.53													1	140.184	7.06801e-80	243.53													1	137.618	1.78674e-36	210.15					N	YDYDLTHIVAAYQERNVTTVLNDPNPIWLVG	X;X;X;X;X;X;X;X;X;X;X;X;X;X;X;Deamidation 18O (N);X;X;X;X;X;X;X;X;X;X;X;X;X;X;X
764	H7BXL0	Fibulin-2 (Fragment)	FBLN2	H7BXL0	1	128.853	5.10606e-254	308.03	303.74	308.03													0.999997	55.9205	2.22888e-05	103.16									1	128.853	5.10606e-254	308.03	1	67.6093	1.83631e-53	184.26					N	GRSCKDVDECALGTHNCSEAETCHNIQGSFR	X;X;X;X;X;X;X;X;X;X;X;X;X;X;X;Deamidation 18O (N);X;X;X;X;X;X;X;X;X;X;X;X;X;X;X
765	F6SFZ6	P2X purinoceptor 4	P2RX4	F6SFZ6	1	92.8379	0.0128783	92.838	59.997	92.838													1	92.8379	0.0128783	92.838																					N	DDTHVPQPAFLKAAENFTLLVKNNIWYPKFN	X;X;X;X;X;X;X;X;X;X;X;X;X;X;X;Deamidation 18O (N);X;X;X;X;X;X;X;X;X;X;X;X;X;X;X
766	F6SFZ6	P2X purinoceptor 4	P2RX4	F6SFZ6	1	94.1145	0.0189483	94.114	36.651	94.114													1	81.2963	0.0247715	81.296													1	93.1624	0.0194119	93.162	1	94.1145	0.0189483	94.114	N	VVSSVTTKVKGVAVTNTSKLGFRIWDVADYV	X;X;X;X;X;X;X;X;X;X;X;X;X;X;X;Deamidation 18O (N);X;X;X;X;X;X;X;X;X;X;X;X;X;X;X
767	B7Z7R8	cDNA FLJ55622, highly similar to Multimerin-1		B7Z7R8	1	136.958	3.4579e-05	136.96	76.277	136.96																													1	136.958	3.4579e-05	136.96					N	RTSFTCACRHPFTGDNCTIKLVEENALAPDF	X;X;X;X;X;X;X;X;X;X;X;X;X;X;X;Deamidation 18O (N);X;X;X;X;X;X;X;X;X;X;X;X;X;X;X
768	B7Z8E7	cDNA FLJ55400, highly similar to Protein OS-9		B7Z8E7	1	209.96	2.25263e-40	209.96	161.8	209.96					1	57.8855	0.0303674	57.885					1	57.8855	0.0311849	57.885													1	169.993	2.25263e-40	169.99	1	209.96	4.37768e-18	209.96	N	SKQHRLKRYHSQTYGNGSKCDLNGRPREAEV	X;X;X;X;X;X;X;X;X;X;X;X;X;X;X;Deamidation 18O (N);X;X;X;X;X;X;X;X;X;X;X;X;X;X;X
769	B7Z9G1	cDNA, FLJ78825		B7Z9G1	1	63.0829	0.00712395	118.69	21.085	118.69					0.999997	55.0513	0.0176112	102.8	0.999998	57.1354	0.0175044	103.02	1	63.0829	0.00712395	118.69													0.999996	54.2815	0.0207003	96.51	0.999977	46.3768	0.0268674	84.699	N	KLNNCTKKPNLSKNLNSQDIK__________	X;X;X;X;X;X;X;X;X;X;X;X;X;X;X;Deamidation 18O (N);X;X;X;X;X;X;X;X;X;X;X;X;X;X;X
770	C9JV77	Alpha-2-HS-glycoprotein	AHSG	C9JV77	0.576617	1.34155	8.46644e-95	212.83	186.84	212.83																									0.576617	1.34155	8.46644e-95	212.83									N	VVHAAKAALAAFNAQNNGSNFQLEEISRAQL	X;X;X;X;X;X;X;X;X;X;X;X;X;X;X;Deamidation 18O (N);X;X;X;X;X;X;X;X;X;X;X;X;X;X;X
771	C9JV77	Alpha-2-HS-glycoprotein	AHSG	C9JV77	0.999911	40.4941	0	360.82	319.6	352.15					0.994805	22.9199	4.83029e-170	287.95					0.999911	40.4941	0	352.15					0.999726	35.6195	4.58817e-239	314.59	0.994026	22.2117	0	360.82	0.996302	24.304	8.84561e-294	330.9	0.999724	35.5912	0	338.61	N	VHAAKAALAAFNAQNNGSNFQLEEISRAQLV	X;X;X;X;X;X;X;X;X;X;X;X;X;X;X;Deamidation 18O (N);X;X;X;X;X;X;X;X;X;X;X;X;X;X;X
772	C9JV77	Alpha-2-HS-glycoprotein	AHSG	C9JV77	1	153.808	1.09796e-28	208.08	185.85	153.81	1	104.244	0.00197785	104.24	1	150.215	3.93989e-12	150.21	1	132.587	3.75972e-06	132.59	1	208.083	1.09796e-28	208.08	1	104.866	0.000679284	104.87	1	133.712	2.60634e-07	133.71	1	164.129	1.2151e-13	164.13	1	179.588	9.91123e-15	179.59	1	153.808	7.01114e-14	153.81	N	DVRKVCQDCPLLAPLNDTRVVHAAKAALAAF	X;X;X;X;X;X;X;X;X;X;X;X;X;X;X;Deamidation 18O (N);X;X;X;X;X;X;X;X;X;X;X;X;X;X;X
774	B7ZAV4	cDNA, FLJ79318, highly similar to 24-dehydrocholesterol reductase		B7ZAV4	1	85.7306	0.00368177	85.731	30.416	85.731																																	1	85.7306	0.00368177	85.731	N	VMTDEAEPSKLSSIGNYYKPWFFKHVENYLK	X;X;X;X;X;X;X;X;X;X;X;X;X;X;X;Deamidation 18O (N);X;X;X;X;X;X;X;X;X;X;X;X;X;X;X
775	B7ZKY6	Membrane metallo-endopeptidase	MME	B7ZKY6	1	86.2877	0.00189773	136.53	98.238	86.288													1	136.53	0.00189773	136.53									1	104.07	0.00477163	104.07	1	86.2877	0.00362347	86.288					N	ALEMNKVMELEKEIANATAKPEDRNDPMLLY	X;X;X;X;X;X;X;X;X;X;X;X;X;X;X;Deamidation 18O (N);X;X;X;X;X;X;X;X;X;X;X;X;X;X;X
776	B7ZKY6	Membrane metallo-endopeptidase	MME	B7ZKY6	1	119.224	0.00177818	119.22	82.523	119.22																													1	119.224	0.00177818	119.22					N	IVAVQKAKALYRSCINESAIDSRGGEPLLKL	X;X;X;X;X;X;X;X;X;X;X;X;X;X;X;Deamidation 18O (N);X;X;X;X;X;X;X;X;X;X;X;X;X;X;X
777	H0YJI6	Thioredoxin domain-containing protein 16 (Fragment)	TXNDC16	H0YJI6	1	88.1769	0.0144277	88.177	56.647	88.177	1	87.3076	0.0144522	87.308					1	88.1769	0.0144277	88.177																									N	TRINCADWSDVCTKQNVTEFPIIKMYKKGEN	X;X;X;X;X;X;X;X;X;X;X;X;X;X;X;Deamidation 18O (N);X;X;X;X;X;X;X;X;X;X;X;X;X;X;X
778	B7ZMJ3	ADAMTSL4 protein	ADAMTSL4	B7ZMJ3	1	265.611	3.37351e-159	274.2	236.86	265.61									1	181.664	2.75241e-56	181.66	1	259.546	4.87778e-79	259.55					1	217.826	3.37351e-159	237.37	1	274.203	4.99476e-110	274.2	1	259.546	4.87778e-79	259.55	1	265.611	1.77513e-93	265.61	N	CQGGTQTREVQCLSTNQTLSTRCPPQLRPSR	X;X;X;X;X;X;X;X;X;X;X;X;X;X;X;Deamidation 18O (N);X;X;X;X;X;X;X;X;X;X;X;X;X;X;X
779	B7ZMJ3	ADAMTSL4 protein	ADAMTSL4	B7ZMJ3	1	113.256	0.00202077	123.98	70.274	113.26	1	75.8249	0.030011	75.825	1	88.9479	0.0214642	88.948	1	104.014	0.0127569	104.01	1	85.666	0.0229403	85.666									1	82.7505	0.0241621	82.75	1	123.983	0.00202077	123.98	1	113.256	0.00810293	113.26	N	GVCGGDDSTCRLVSGNLTDRGGPLGYQKILW	X;X;X;X;X;X;X;X;X;X;X;X;X;X;X;Deamidation 18O (N);X;X;X;X;X;X;X;X;X;X;X;X;X;X;X
780	B8ZZC1	Fibulin-7	FBLN7	B8ZZC1	1	159.669	4.21611e-77	230.71	214.48	159.67	1	111.989	1.1058e-05	111.99	1	198.903	3.22155e-50	198.9	1	228.146	7.28142e-77	228.15	1	230.71	4.21611e-77	230.71	1	46.5776	0.0201469	46.578	1	97.7764	0.000811043	97.776	1	180.037	3.06103e-41	180.04	1	175.593	1.16756e-39	175.59	1	159.669	2.18711e-32	159.67	N	PGFRLVGPSSVVCLPNGTWTGEQPHCRGISE	X;X;X;X;X;X;X;X;X;X;X;X;X;X;X;Deamidation 18O (N);X;X;X;X;X;X;X;X;X;X;X;X;X;X;X
781	H7C248	Lysyl oxidase homolog 3 (Fragment)	LOXL3	H7C248	1	147.18	4.05721e-20	147.18	130.15	147.18																									1	54.5244	0.0442777	54.524	1	129.537	4.98087e-06	129.54	1	147.18	4.05721e-20	147.18	N	RCSGQELSLWKCPHKNITAEDCSHSQDAGVR	X;X;X;X;X;X;X;X;X;X;X;X;X;X;X;Deamidation 18O (N);X;X;X;X;X;X;X;X;X;X;X;X;X;X;X
782	E1A689	Mutant Apo B 100		E1A689	1	179.834	1.16973e-65	201.95	171.4	179.83													1	201.954	6.17314e-30	201.95									1	134.615	8.35732e-18	134.61	1	179.834	1.16973e-65	179.83					N	FQALTARFEVDSPVYNATWSASLKNKADYVE	X;X;X;X;X;X;X;X;X;X;X;X;X;X;X;Deamidation 18O (N);X;X;X;X;X;X;X;X;X;X;X;X;X;X;X
783	E1A689	Mutant Apo B 100		E1A689	1	231.446	1.55159e-100	266.97	238.01	266.97					1	89.3113	0.00279961	92.99					1	218.567	9.35319e-72	248.77	1	99.1712	0.000233274	116.54	1	199.162	6.92648e-37	216.83	1	194.119	3.81218e-37	220.53	1	231.446	1.55159e-100	266.97					N	DPNTGRLNGESNLRFNSSYLQGTNQITGRYE	X;X;X;X;X;X;X;X;X;X;X;X;X;X;X;Deamidation 18O (N);X;X;X;X;X;X;X;X;X;X;X;X;X;X;X
784	E1A689	Mutant Apo B 100		E1A689	1	117.375	9.34017e-05	117.37	91.251	117.37													1	56.2147	0.0226065	56.215	1	41.8601	0.0398522	41.86	1	83.9663	0.00147392	83.966	1	83.4175	0.00154243	83.418	1	106.377	0.000728874	106.38	1	117.375	9.34017e-05	117.37	N	ATALSLSNKFVEGSHNSTVSLTTKNMEVSVA	X;X;X;X;X;X;X;X;X;X;X;X;X;X;X;Deamidation 18O (N);X;X;X;X;X;X;X;X;X;X;X;X;X;X;X
785	E1A689	Mutant Apo B 100		E1A689	1	175.669	1.68343e-165	252.88	218.19	241.17													1	176.74	1.56035e-85	252.88									1	173.366	3.60349e-165	238.87	1	171.19	1.41344e-59	241.17	1	175.669	1.68343e-165	241.17	N	HLRVNQNLVYESGSLNFSKLEIQSQVDSQHV	X;X;X;X;X;X;X;X;X;X;X;X;X;X;X;Deamidation 18O (N);X;X;X;X;X;X;X;X;X;X;X;X;X;X;X
786	E1A689	Mutant Apo B 100		E1A689	1	102.397	1.93985e-08	169.89	123.43	102.4													1	169.891	1.93985e-08	169.89					1	86.3126	0.00736144	86.313	1	138.626	9.6044e-07	138.63	1	119.55	0.000653151	119.55	1	102.397	0.00440721	102.4	N	SKPTVSSSMEFKYDFNSSMLYSTAKGAVDHK	X;X;X;X;X;X;X;X;X;X;X;X;X;X;X;Deamidation 18O (N);X;X;Oxidation (M);X;X;X;X;X;X;X;X;X;X;X;X
787	C9JA36	Sodium/potassium-transporting ATPase subunit beta-3 (Fragment)	ATP1B3	C9JA36	1	117.233	2.86434e-09	142.97	118.98	117.23													1	142.968	2.86434e-09	142.97													1	130.098	3.72648e-05	130.1	1	117.233	0.000448671	117.23	N	DLKKFLKPYTLEEQKNLTVCPDGALFEQKGP	X;X;X;X;X;X;X;X;X;X;X;X;X;X;X;Deamidation 18O (N);X;X;X;X;X;X;X;X;X;X;X;X;X;X;X
788	F5GZZ9	Scavenger receptor cysteine-rich type 1 protein M130	CD163	F5GZZ9	1	69.2757	0.00530885	94.82	79.669	69.276													1	94.8197	0.00530885	94.82													1	69.2757	0.0314337	69.276					N	NQLGCPTAIKAPGWANSSAGSGRIWMDHVSC	X;X;X;X;X;X;X;X;X;X;X;X;X;X;X;Deamidation 18O (N);X;X;X;X;X;X;X;X;X;X;X;X;X;X;X
789	F5GZZ9	Scavenger receptor cysteine-rich type 1 protein M130	CD163	F5GZZ9	1	110.857	2.86434e-09	142.97	126.59	110.86													1	142.968	2.86434e-09	142.97					1	110.857	0.000681976	110.86													N	RWGHSECGHKEDAAVNCTDISVQKTPQKATT	X;X;X;X;X;X;X;X;X;X;X;X;X;X;X;Deamidation 18O (N);X;X;X;X;X;X;X;X;X;X;X;X;X;X;X
790	F5GZZ9	Scavenger receptor cysteine-rich type 1 protein M130	CD163	F5GZZ9	1	102.062	0.00838626	102.06	94.13	102.06													1	102.062	0.00838626	102.06																					N	AGSGRIWMDHVSCRGNESALWDCKHDGWGKH	X;X;X;X;X;X;X;X;X;X;X;X;X;X;X;Deamidation 18O (N);X;X;X;X;X;X;X;X;X;X;X;X;X;X;X
791	F5GZZ9	Scavenger receptor cysteine-rich type 1 protein M130	CD163	F5GZZ9	1	109.052	2.37089e-08	115.55	107.98	115.55													1	109.052	2.37089e-08	115.55																					N	SALWDCKHDGWGKHSNCTHQQDAGVTCSDGS	X;X;X;X;X;X;X;X;X;X;X;X;X;X;X;Deamidation 18O (N);X;X;X;X;X;X;X;X;X;X;X;X;X;X;X
792	C9JSN9	Biotinidase (Fragment)	BTD	C9JSN9	1	96.3311	0.0178689	96.331	60.451	96.331													1	96.3311	0.0178689	96.331																					N	PQVVRWNPCLEPHRFNDTEVLQRLSCMAIRG	X;X;X;X;X;X;X;X;X;X;X;X;X;X;X;Deamidation 18O (N);X;X;X;X;X;X;X;X;X;X;X;X;X;X;X
793	C9JV37	Prothrombin (Fragment)	F2	C9JV37	1	147.388	2.11967e-50	201.61	190.31	201.61					1	116.521	1.08343e-39	175.86					1	100.994	5.80234e-25	142.79													1	147.388	2.11967e-50	201.61	1	120.4	5.44769e-25	143.4	N	ECQLWRSRYPHKPEINSTTHPGADLQENFCR	X;X;X;X;X;X;X;X;X;X;X;X;X;X;X;Deamidation 18O (N);X;X;X;X;X;X;X;X;X;X;X;X;X;X;X
794	C9JVN1	Melanotransferrin (Fragment)	MELTF	C9JVN1	1	91.7826	0.0228404	91.853	87.497	91.783	1	61.6019	0.0415431	61.602									1	76.6045	0.0326986	76.605	1	86.6702	0.0256103	86.67	1	91.8534	0.0252933	91.853	1	74.9199	0.0357921	74.92	1	91.7826	0.0228404	91.783					N	VRWCATSDPEQHKCGNMSEAFREAGIQPSLL	X;X;X;X;X;X;X;X;X;X;X;X;X;X;X;Deamidation 18O (N);Oxidation (M);X;X;X;X;X;X;X;X;X;X;X;X;X;X
795	C9JVN1	Melanotransferrin (Fragment)	MELTF	C9JVN1	1	135.767	0.00348131	135.77	53.488	135.77																					1	84.2272	0.0273538	84.227	1	135.767	0.00348131	135.77									N	TIDTLKGVKSCHTGINRTVGWNVPVGYLVES	X;X;X;X;X;X;X;X;X;X;X;X;X;X;X;Deamidation 18O (N);X;X;X;X;X;X;X;X;X;X;X;X;X;X;X
806	Q96PQ9	Lysyl oxidase	LOX	Q96PQ9	1	95.4585	0.000469737	103.17	94.462	103.17	1	79.3322	0.00141138	86.727	0.999957	43.6517	0.023086	47.814	1	95.4585	0.000469737	103.17					1	86.9431	0.00144231	94.057	1	65.7605	0.00357168	73.294													N	YSTSRAREPGASRAENQTAPGEVPALSNLRP	X;X;X;X;X;X;X;X;X;X;X;X;X;X;X;Deamidation 18O (N);X;X;X;X;X;X;X;X;X;X;X;X;X;X;X
807	Q96PQ9	Lysyl oxidase	LOX	Q96PQ9	1	157.568	3.04824e-25	157.85	142.34	157.57	1	78.9872	0.00166739	78.987	1	94.4498	0.000944322	94.45	1	114.02	4.82934e-06	114.02	1	118.964	3.40505e-08	118.96	1	94.6322	3.67466e-15	150.11	1	96.3792	9.63559e-08	126.09	1	157.855	3.04824e-25	157.85	1	129.462	9.53511e-13	129.46	1	157.568	3.33992e-25	157.57	N	PQRRRDPGAAVPGAANASAQQPRTPILLIRD	X;X;X;X;X;X;X;X;X;X;X;X;X;X;X;Deamidation 18O (N);X;X;X;X;X;X;X;X;X;X;X;X;X;X;X
808	D2Y6X4	NADH dehydrogenase subunit 4 (EC 1.6.5.3) (Fragment)	ND4	D2Y6X4	0.939297	11.8959	0.022984	57.203	24.597	57.203																																	0.939297	11.8959	0.022984	57.203	N	________SLTHHINNMKPSFTRENTLMFMH	X;X;X;X;X;X;X;X;X;X;X;X;X;X;X;Deamidation 18O (N);Oxidation (M);X;X;X;X;X;X;X;X;X;X;X;X;X;X
809	H7C5U2	Integrin beta (Fragment)	ITGB5	H7C5U2	0.99934	31.7993	3.15943e-15	141.22	132.93	141.22													0.99934	31.7993	3.15943e-15	141.22																					N	CGECKCHAGYIGDNCNCSTDISTCRGRDGQI	X;X;X;X;X;X;X;X;X;X;X;X;X;X;X;Deamidation 18O (N);X;X;X;X;X;X;X;X;X;X;X;X;X;X;X
810	H7C5U2	Integrin beta (Fragment)	ITGB5	H7C5U2	1	211.57	6.06193e-57	211.57	204.84	211.57																													1	211.57	6.06193e-57	211.57					N	TCGCSVGLEPNSARCNGSGTYVCGLCECSPG	X;X;X;X;X;X;X;X;X;X;X;X;X;X;X;Deamidation 18O (N);X;X;X;X;X;X;X;X;X;X;X;X;X;X;X
811	H7C5U2	Integrin beta (Fragment)	ITGB5	H7C5U2	1	76.4173	0.00200127	76.417	66.93	76.417													1	76.4173	0.00200127	76.417																					N	RDCVECLLLHSGKPDNQTCHSLCRDEVITWV	X;X;X;X;X;X;X;X;X;X;X;X;X;X;X;Deamidation 18O (N);X;X;X;X;X;X;X;X;X;X;X;X;X;X;X
812	H7C5U2	Integrin beta (Fragment)	ITGB5	H7C5U2	1	125.252	1.16012e-16	155.51	44.877	125.25	1	155.51	1.16012e-16	155.51	1	154.013	1.49937e-16	154.01	1	143.853	2.27303e-10	143.85	1	154.35	0.045721	154.35									1	154.013	1.49937e-16	154.01	1	125.252	0.00141642	125.25	1	125.252	0.00141642	125.25	N	CVMMFTYVELPSGKSNLTVLRE_________	X;X;X;X;X;X;X;X;X;X;X;X;X;X;X;Deamidation 18O (N);X;X;X;X;X;X;X;X;X;X;X;X;X;X;X
813	Q8WWJ8	Integrin beta		Q8WWJ8	1	167.179	4.82028e-12	190.15	151.13	167.18													1	190.152	4.82028e-12	190.15					1	72.34	0.0320253	72.34					1	171.924	1.59665e-08	171.92	1	167.179	1.69583e-08	167.18	N	ECIESGPGCTWCQKLNFTGPGDPDSIRCDTR	X;X;X;X;X;X;X;X;X;X;X;X;X;X;X;Deamidation 18O (N);X;X;X;X;X;X;X;X;X;X;X;X;X;X;X
814	Q8WWJ8	Integrin beta		Q8WWJ8	0.999834	37.7963	4.91606e-148	295.34	272.02	295.34													0.999834	37.7963	4.91606e-148	295.34					0.999463	32.6944	7.03844e-41	227.2													N	ECQPPFAFRHVLKLTNNSNQFQTEVGKQLIS	X;X;X;X;X;X;X;X;X;X;X;X;X;X;X;Deamidation 18O (N);X;X;X;X;X;X;X;X;X;X;X;X;X;X;X
815	D3DTX7	Collagen, type I, alpha 1, isoform CRA_a	COL1A1 hCG_29609	D3DTX7;P02452	1	158.519	1.91552e-47	170.56	138.28	158.52													1	170.558	1.91552e-47	170.56	1	56.5991	0.0369569	56.599									1	158.519	4.12697e-14	158.52					N	IQLTFLRLMSTEASQNITYHCKNSVAYMDQQ	X;X;X;X;X;X;X;X;Oxidation (M);X;X;X;X;X;X;Deamidation 18O (N);X;X;X;X;X;X;X;X;X;X;X;X;X;X;X
816	D6RD17	Immunoglobulin J chain (Fragment)	JCHAIN	D6RD17	1	172.981	1.07567e-05	180.67	154.16	172.98													1	148.321	2.58329e-05	148.32					1	97.8134	0.00629423	97.813	1	180.673	1.07567e-05	180.67	1	137.459	3.47943e-05	137.46	1	172.981	4.88129e-05	172.98	N	VERNIRIIVPLNNRENISDPTSPLRTRFVYH	X;X;X;X;X;X;X;X;X;X;X;X;X;X;X;Deamidation 18O (N);X;X;X;X;X;X;X;X;X;X;X;X;X;X;X
817	D6RDV5	Ephrin-A5	EFNA5	D6RDV5	0.998042	27.0741	5.87619e-05	126.82	99.71	95.09					0.995385	23.3381	0.00508366	100.02	0.995479	23.4278	0.00491696	101.11	0.802985	6.10209	0.00513943	99.653									0.995037	23.0211	5.87619e-05	126.82					0.998042	27.0741	0.00704761	95.09	N	DPGSKAVADRYAVYWNSSNPRFQRGDYHIDV	X;X;X;X;X;X;X;X;X;X;X;X;X;X;X;Deamidation 18O (N);X;X;X;X;X;X;X;X;X;X;X;X;X;X;X
818	D6W633	Protein tyrosine phosphatase, receptor type, S, isoform CRA_a	PTPRS hCG_23499	D6W633	1	98.4429	2.76566e-08	118.37	108.45	98.443	1	43.8232	0.045792	43.823									1	118.368	2.76566e-08	118.37													1	98.4429	0.000857921	98.443					N	EDTPRGHPQILEAAGNASAGTVLLRWLPPVP	X;X;X;X;X;X;X;X;X;X;X;X;X;X;X;Deamidation 18O (N);X;X;X;X;X;X;X;X;X;X;X;X;X;X;X
819	D6W633	Protein tyrosine phosphatase, receptor type, S, isoform CRA_a	PTPRS hCG_23499	D6W633	1	123.948	0.00163941	123.95	99.605	123.95					1	123.948	0.00163941	123.95																													N	DVPSAPPRKVEAEALNATAIRVLWRSPAPGR	X;X;X;X;X;X;X;X;X;X;X;X;X;X;X;Deamidation 18O (N);X;X;X;X;X;X;X;X;X;X;X;X;X;X;X
820	D9MWI3	Prostaglandin-endoperoxidase synthase 2 (EC 1.14.99.1) (Fragment)	PTGS2	D9MWI3	1	113.068	0.000213681	113.07	99.163	113.07					1	113.068	0.000213681	113.07																													N	DQYKCDCTRTGFYGENCSTPEFLTRIKLFLK	X;X;X;X;X;X;X;X;X;X;X;X;X;X;X;Deamidation 18O (N);X;X;X;X;X;X;X;X;X;X;X;X;X;X;X
821	D9ZGF2	Collagen, type VI, alpha 3 (Epididymis secretory sperm binding protein)	COL6A3	D9ZGF2	1	166.386	6.15772e-15	182.92	164.14	182.92					1	127.91	1.26526e-07	138.24	1	125.706	1.86404e-13	136.27	1	87.798	0.00304749	96.103	1	166.386	6.15772e-15	182.92	1	139.254	6.87374e-14	153.54	1	143.676	1.13541e-13	162.49	1	132.737	4.03213e-13	151.55	1	137.179	8.11034e-14	155.99	N	PGYPGPKGNPGEPGLNGTTGPKGIRGRRGNS	X;X;X;X;X;X;X;X;X;X;X;X;X;X;X;Deamidation 18O (N);X;X;X;X;X;X;X;X;X;X;X;X;X;X;X
822	D9ZGF2	Collagen, type VI, alpha 3 (Epididymis secretory sperm binding protein)	COL6A3	D9ZGF2	1	424.804	0	445.76	374.82	424.8	1	297.885	1.21692e-167	297.88	1	365.157	0	365.16	1	350.537	0	350.54	1	238.122	0	445.76	1	357.951	0	357.95	1	391.271	0	391.27	1	227.886	0	408.64	1	230.972	0	379.39	1	424.804	0	424.8	N	PGDEGGPGERGPPGVNGTQGFQGCPGQRGVK	X;X;X;X;X;X;X;X;X;X;X;X;X;X;X;Deamidation 18O (N);X;X;X;X;X;X;X;X;X;X;X;X;X;X;X
823	D9ZGF2	Collagen, type VI, alpha 3 (Epididymis secretory sperm binding protein)	COL6A3	D9ZGF2	1	114.186	0.000311055	133.57	90.327	114.19	1	73.985	0.0290555	73.985	1	73.985	0.0376705	73.985					1	123.86	0.000311055	123.86	1	107.574	0.00523363	107.57	1	115.714	0.00127783	115.71	1	107.154	0.00545319	107.15	1	133.574	0.000823527	133.57	1	114.186	0.0017806	114.19	N	GVRNIDSEEVGKIASNSATAFRVGNVQELSE	X;X;X;X;X;X;X;X;X;X;X;X;X;X;X;Deamidation 18O (N);X;X;X;X;X;X;X;X;X;X;X;X;X;X;X
824	D9ZGF2	Collagen, type VI, alpha 3 (Epididymis secretory sperm binding protein)	COL6A3	D9ZGF2	1	68.4451	1.47575e-79	243.23	229.91	68.445													1	68.4451	7.35937e-47	210.43					1	218.88	2.00679e-55	218.88	1	121.472	1.32868e-12	121.47	1	243.231	1.47575e-79	243.23	1	158.017	2.75521e-40	158.02	N	LNTYRTKQEVLSHISNMSYIGGTNQTGKGLE	X;X;X;X;X;X;X;X;X;X;X;X;X;X;X;Deamidation 18O (N);X;X;X;X;X;X;X;Deamidation 18O (N);X;X;X;X;X;X;X
825	D9ZGF2	Collagen, type VI, alpha 3 (Epididymis secretory sperm binding protein)	COL6A3	D9ZGF2	1	68.4451	1.47575e-79	243.23	229.91	68.445													1	68.4451	7.35937e-47	210.43					1	218.88	2.00679e-55	218.88	1	121.472	1.32868e-12	121.47	1	243.231	1.47575e-79	243.23	1	158.017	2.75521e-40	158.02	N	EVLSHISNMSYIGGTNQTGKGLEYIMQSHLT	X;X;X;X;X;X;X;Deamidation 18O (N);X;X;X;X;X;X;X;Deamidation 18O (N);X;X;X;X;X;X;X;X;X;X;X;X;X;X;X
826	D9ZGF2	Collagen, type VI, alpha 3 (Epididymis secretory sperm binding protein)	COL6A3	D9ZGF2	0.999999	61.6888	4.49389e-27	134.9	92.259	134.9																					0.999999	61.6888	4.49389e-27	134.9													N	ITPLFLTRQEDRQLINALQINNTAVGHALVL	X;X;X;X;X;X;X;X;X;X;X;X;X;X;X;Deamidation 18O (N);X;X;X;X;Deamidation 18O (N);X;X;X;X;X;X;X;X;X;X
827	D9ZGF2	Collagen, type VI, alpha 3 (Epididymis secretory sperm binding protein)	COL6A3	D9ZGF2	0.99431	22.424	6.76315e-214	299.17	279.93	299.17	0.860329	7.89558	1.48888e-31	152.81	0.933214	11.4529	1.51016e-41	184.26	0.835684	7.06363	1.4187e-31	153.19	0.906965	9.88945	3.25218e-89	236.95	0.865566	8.0879	4.82601e-39	166.06	0.888509	9.0142	2.19636e-41	182.39	0.99431	22.424	6.76315e-214	299.17	0.938486	11.8346	7.74325e-54	206.71	0.5	0	1.01309e-41	185.61	N	LTRQEDRQLINALQINNTAVGHALVLPAGRD	X;X;X;X;X;X;X;X;X;X;Deamidation 18O (N);X;X;X;X;Deamidation 18O (N);Deamidation 18O (N);X;X;X;X;X;X;X;X;X;X;X;X;X;X
828	D9ZGF2	Collagen, type VI, alpha 3 (Epididymis secretory sperm binding protein)	COL6A3	D9ZGF2	0.846131	6.53118	1.73664e-45	195.56	191.42	46.178					0.846131	6.53118	0.0251032	46.178																	0.5	0	1.73664e-45	195.56					0.5	0	1.01309e-41	185.61	N	TRQEDRQLINALQINNTAVGHALVLPAGRDL	X;X;X;X;X;X;X;X;X;X;X;X;X;X;Deamidation 18O (N);Deamidation 18O (N);X;X;X;X;X;X;X;X;X;X;X;X;X;X;X
829	D9ZGF2	Collagen, type VI, alpha 3 (Epididymis secretory sperm binding protein)	COL6A3	D9ZGF2	1	129.65	5.45912e-15	218.06	126.15	129.65					1	90.3698	0.0229516	90.37	1	163.985	0.000459895	163.99									1	122.742	0.00559342	122.74	1	218.056	5.45912e-15	218.06					1	129.65	0.00417521	129.65	N	LTVTSAHDQSLVLKQNLTVTDRVIGGLLAGQ	X;X;X;X;X;X;X;X;X;X;X;X;X;X;X;Deamidation 18O (N);X;X;X;X;X;X;X;X;X;X;X;X;X;X;X
830	D9ZGF2	Collagen, type VI, alpha 3 (Epididymis secretory sperm binding protein)	COL6A3	D9ZGF2	1	104.056	4.67012e-105	257.35	238.08	104.06	1	119.619	2.33214e-08	119.62	1	96.718	0.00246966	96.718	1	78.7943	8.51091e-06	102.07	1	163.418	6.2928e-50	215.48	1	166.063	1.30388e-29	166.06	1	101.382	2.70834e-19	144.92	1	181.997	4.67012e-105	257.35	1	138.031	1.4542e-55	219.61	1	104.056	9.60643e-20	147.67	N	ARVAVVQHAPSESVDNASMPPVKVEFSLTDY	X;X;X;X;X;X;X;X;X;X;X;X;X;X;X;Deamidation 18O (N);X;X;Oxidation (M);X;X;X;X;X;X;X;X;X;X;X;X
831	D9ZGF2	Collagen, type VI, alpha 3 (Epididymis secretory sperm binding protein)	COL6A3	D9ZGF2	0.842506	7.28309	2.17034e-23	206.1	171.56	206.1													0.842506	7.28309	2.17034e-23	206.1																					N	SNCPRGARVAVVTYNNEVTTEIRFADSKRKS	X;X;X;X;X;X;X;X;X;X;X;X;X;X;X;Deamidation 18O (N);X;X;X;X;X;X;X;X;X;X;X;X;X;X;X
832	D9ZGF2	Collagen, type VI, alpha 3 (Epididymis secretory sperm binding protein)	COL6A3	D9ZGF2	1	192.147	4.89655e-25	192.15	170.39	192.15													1	192.147	4.89655e-25	192.15																					N	NIGPSKVRVGVVQFSNDVFPEFYLKTYRSQA	X;X;X;X;X;X;X;X;X;X;X;X;X;X;X;Deamidation 18O (N);X;X;X;X;X;X;X;X;X;X;X;X;X;X;X
833	E5RIA2	Ectonucleotide pyrophosphatase/phosphodiesterase family member 2	ENPP2	E5RIA2	1	117.036	0.00383665	117.04	79.478	117.04					1	71.3794	0.0371892	71.379					1	101.542	0.0144198	101.54	1	83.2647	0.0239466	83.265	1	84.7431	0.0233271	84.743	1	96.2529	0.0340631	96.253					1	117.036	0.00383665	117.04	N	KFSNNAKYDPKAIIANLTCKKPDQHFKPYLK	X;X;X;X;X;X;X;X;X;X;X;X;X;X;X;Deamidation 18O (N);X;X;X;X;X;X;X;X;X;X;X;X;X;X;X
834	P35443	Thrombospondin-4	THBS4 TSP4	P35443	1	262.684	2.78975e-120	269.14	253.75	267.23	1	194.077	6.03502e-39	200.16	1	241.812	3.6195e-90	246.53	1	197.042	1.11164e-45	207.39	1	264.424	2.78975e-120	269.14									1	175.533	2.72197e-73	209.66	1	194.811	5.41459e-105	261.02	1	262.684	5.75763e-120	267.23	N	FSQENIIWSNLKYRCNDTIPEDFQEFQTQNF	X;X;X;X;X;X;X;X;X;X;X;X;X;X;X;Deamidation 18O (N);X;X;X;X;X;X;X;X;X;X;X;X;X;X;X
835	E7ETN3	Uncharacterized protein		E7ETN3	1	61.499	3.46283e-05	61.499	49.757	61.499					1	61.499	3.46283e-05	61.499																													N	EQQKRKIVLDPSGSMNIYLVLDGSDSIGASN	X;X;X;X;X;X;X;X;X;X;X;X;X;X;X;Deamidation 18O (N);X;X;X;X;X;X;X;X;X;X;X;X;X;X;Deamidation 18O (N)
836	E7ETN3	Uncharacterized protein		E7ETN3	1	61.499	3.46283e-05	61.499	49.757	61.499					1	61.499	3.46283e-05	61.499																													N	NIYLVLDGSDSIGASNFTGAKKCLVNLIEKV	Deamidation 18O (N);X;X;X;X;X;X;X;X;X;X;X;X;X;X;Deamidation 18O (N);X;X;X;X;X;X;X;X;X;X;X;X;X;X;X
837	E7ETN3	Uncharacterized protein		E7ETN3	1	203.114	6.38468e-40	203.11	182.88	203.11													1	203.114	6.38468e-40	203.11																					N	NGIYTPRLGSYPVGGNVSFECEDGFILRGSP	X;X;X;X;X;X;X;X;X;X;X;X;X;X;X;Deamidation 18O (N);X;X;X;X;X;X;X;X;X;X;X;X;X;X;X
838	E7ETN3	Uncharacterized protein		E7ETN3	1	263.556	3.51988e-177	292.83	274.1	263.56													1	208.465	3.05122e-45	208.47													1	292.825	3.51988e-177	292.83	1	263.556	3.60764e-119	263.56	N	YLDVSKLTDTICGVGNMSANASDQERTPWHV	X;X;X;X;X;X;X;X;X;X;X;X;X;X;X;Deamidation 18O (N);X;X;X;Deamidation 18O (N);X;X;X;X;X;X;X;X;X;X;X
839	E7ETN3	Uncharacterized protein		E7ETN3	1	263.556	3.51988e-177	292.83	274.1	263.56													1	208.465	3.05122e-45	208.47													1	292.825	3.51988e-177	292.83	1	263.556	3.60764e-119	263.56	N	SKLTDTICGVGNMSANASDQERTPWHVTIKP	X;X;X;X;X;X;X;X;X;X;X;Deamidation 18O (N);X;X;X;Deamidation 18O (N);X;X;X;X;X;X;X;X;X;X;X;X;X;X;X
840	E7ETN3	Uncharacterized protein		E7ETN3	1	123.72	5.53913e-05	123.72	108.52	123.72					1	55.0106	0.0272878	55.011					1	95.4284	0.0016499	95.428	1	43.2974	0.040673	43.297	1	55.8154	0.0261343	55.815	1	95.0671	0.00165011	95.067	1	72.8979	0.00645616	72.898	1	123.72	5.53913e-05	123.72	N	ELLNKQSVPAHFVALNGSKLNINLKMGVEWT	X;X;X;X;X;X;X;X;X;X;X;X;X;X;X;Deamidation 18O (N);X;X;X;X;X;X;X;X;X;X;X;X;X;X;X
841	E7ETN3	Uncharacterized protein		E7ETN3	1	198.314	6.54822e-40	198.31	181.81	198.31					1	175.848	3.77919e-30	175.85	1	180.316	1.90846e-31	180.32	1	190.786	6.68645e-35	190.79													1	156.74	5.40288e-26	156.74	1	198.314	6.54822e-40	198.31	N	HDFENGEYWPRSPYYNVSDEISFHCYDGYTL	X;X;X;X;X;X;X;X;X;X;X;X;X;X;X;Deamidation 18O (N);X;X;X;X;X;X;X;X;X;X;X;X;X;X;X
842	E7ETN3	Uncharacterized protein		E7ETN3	1	148.62	0.000879843	148.62	139.71	148.62					1	106.423	0.0058349	106.42					1	113.706	0.00203125	113.71									1	141.48	0.00121988	141.48	1	138.098	0.00105032	138.1	1	148.62	0.000879843	148.62	N	TSCAEVVSQEKTMFPNLTDVREVVTDQFLCS	X;X;X;X;X;X;X;X;X;X;X;X;X;X;X;Deamidation 18O (N);X;X;X;X;X;X;X;X;X;X;X;X;X;X;X
843	Q96HU3	FAM38A protein	FAM38A	Q96HU3	1	120.09	0.000700395	120.09	76.282	120.09																													1	120.09	0.000700395	120.09					N	RISPPSRAQMKRELYNGTADITLRFTWNFQR	X;X;X;X;X;X;X;X;X;X;X;X;X;X;X;Deamidation 18O (N);X;X;X;X;X;X;X;X;X;X;X;X;X;X;X
844	E9PGV9	ATP-binding cassette sub-family G member 1	ABCG1	E9PGV9	0.841805	7.26144	0.019194	49.973	23.164	49.973									0.841805	7.26144	0.019194	49.973																									N	MAVAPGHLRAWVMRNNVTTNIPSAFSGTLTH	X;X;X;X;X;X;X;X;X;X;X;X;X;X;X;Deamidation 18O (N);X;X;X;X;X;X;X;X;X;X;X;X;X;X;X
845	E9PRZ7	Stromal interaction molecule 1 (Fragment)	STIM1	E9PRZ7	1	73.6317	3.08106e-08	142.19	94.995	73.632													1	142.193	3.08106e-08	142.19					1	73.6317	0.0136841	73.632													N	KLQLSGHAMPRLAVTNTTMTGTVLKMTDR__	X;X;X;X;X;X;X;X;X;X;X;X;X;X;X;Deamidation 18O (N);X;X;X;X;X;X;X;X;X;X;X;X;X;X;X
846	H0YE75	Latent-transforming growth factor beta-binding protein 3 (Fragment)	LTBP3	H0YE75	0.998848	29.3799	0.0069581	45.125	42.192	45.125																									0.998848	29.3799	0.0069581	45.125									N	TCLKGQCRDSCQQGSNMTLIGENGHSTDTLT	X;X;X;X;X;X;X;X;X;X;X;X;X;X;X;Deamidation 18O (N);X;X;X;X;X;X;X;X;X;X;X;X;X;X;X
847	F2YYR6	Vascular cell adhesion molecule 1 (Fragment)	VCAM1	F2YYR6	1	88.1055	2.66215e-15	124.03	115.74	124.03													1	88.1055	2.66215e-15	124.03					0.99999	49.8154	1.5456e-05	61.186													N	QIDSPLSGKVRSEGTNSTLTLSPVSFENEHS	X;X;X;X;X;X;X;X;X;X;X;X;X;X;X;Deamidation 18O (N);X;X;X;X;X;X;X;X;X;X;X;X;X;X;X
848	F5GXA0	Formylglycine-generating enzyme	SUMF1	F5GXA0	1	109.236	1.04456e-09	184.36	155.2	109.24													1	123.801	0.000267947	123.8					1	100.722	0.00457215	100.72	1	131.369	5.21654e-05	131.37	1	184.361	1.04456e-09	184.36	1	109.236	0.00294905	109.24	N	MDAYEVSNTEFEKFVNSTGYLTEAEKFGDSF	X;X;X;X;X;X;X;X;X;X;X;X;X;X;X;Deamidation 18O (N);X;X;X;X;X;X;X;X;X;X;X;X;X;X;X
849	F5GYM2	Protein Wnt	WNT5B	F5GYM2	1	222.225	7.53203e-110	271.21	261.77	271.21													1	222.225	7.53203e-110	271.21																					N	TGIKECQHQFRQRRWNCSTADNASVFGRVMQ	X;X;X;X;X;X;X;X;X;X;X;X;X;X;X;Deamidation 18O (N);X;X;X;X;X;X;X;X;X;X;X;X;X;X;X
850	F8W7F7	Transmembrane emp24 domain-containing protein 4	TMED4	F8W7F7	1	189.439	9.20033e-36	196.62	182.6	189.44	1	154.187	8.82216e-26	154.19	1	99.508	8.76717e-32	184.7	1	157.975	3.80741e-26	157.97	1	63.0559	2.14258e-35	195.39	1	196.62	9.20033e-36	196.62	1	62.3624	1.2275e-35	196.31	1	169.39	1.05419e-29	169.39	1	189.439	8.0784e-35	189.44					N	FTSHTPGDHQICLHSNSTRMALFAGGKLYRE	X;X;X;X;X;X;X;X;X;X;X;X;X;X;X;Deamidation 18O (N);X;X;X;X;X;X;X;X;X;X;X;X;X;X;X
851	F8WAZ6	Mitochondrial-processing peptidase subunit beta	PMPCB	F8WAZ6	1	81.1906	0.00452968	114.78	69.065	81.191	1	113.696	0.00537993	113.7	1	98.9966	0.0161323	98.997	1	114.783	0.00452968	114.78	1	104.366	0.01252	104.37	1	93.5608	0.0192179	93.561	1	111.008	0.00748277	111.01	1	72.4847	0.0354045	72.485	1	81.8902	0.0245226	81.89	1	81.1906	0.0248158	81.191	N	YYAKAFSKDLPRAYQNTALGRTILGPTENIK	X;X;X;X;X;X;X;X;X;X;X;X;X;X;X;Deamidation 18O (N);X;X;X;X;X;X;X;X;X;X;X;X;X;X;X
852	G3V357	Ribonuclease pancreatic	RNASE1	G3V357	1	215.069	2.70817e-06	215.07	99.291	215.07	1	80.2291	0.0295974	80.229																													1	215.069	2.70817e-06	215.07	N	PSSSSTYCNQMMRRRNMTQGRCKPVNTFVHE	X;X;X;X;X;X;X;X;X;X;X;X;X;X;X;Deamidation 18O (N);X;X;X;X;X;X;X;X;X;X;X;X;X;X;X
853	G3V357	Ribonuclease pancreatic	RNASE1	G3V357	1	126.658	4.71521e-80	241.4	195.72	126.66	1	68.5154	0.00524274	85.522	1	125.97	2.73249e-05	125.97	1	44.6158	0.00469161	110.86	1	141.084	2.65114e-46	241.4	1	158.08	1.98944e-05	158.08	1	99.5386	0.00226751	99.539	1	118.766	4.71521e-80	203.8	1	120.63	1.26297e-52	185.99	1	126.658	1.83537e-29	163.46	N	EKVTCKNGQGNCYKSNSSMHITDCRLTNGSR	X;X;X;X;X;X;X;X;X;X;X;X;X;X;X;Deamidation 18O (N);X;X;Oxidation (M);X;X;X;X;X;X;X;X;X;X;X;X
854	Q59EE6	Latent transforming growth factor beta binding protein 2 variant (Fragment)		Q59EE6	1	115.699	5.014e-06	130.98	127.56	115.7													1	128.035	5.014e-06	130.98									1	115.699	0.00120449	115.7									N	NGGRCIGRDECWCPANSTGKFCHLPIPQPDR	X;X;X;X;X;X;X;X;X;X;X;X;X;X;X;Deamidation 18O (N);X;X;X;X;X;X;X;X;X;X;X;X;X;X;X
855	Q59EE6	Latent transforming growth factor beta binding protein 2 variant (Fragment)		Q59EE6	1	111.975	3.10025e-191	295.03	269.71	111.97	1	50.0294	2.84277e-39	170.27	1	165.376	5.15675e-39	165.38	1	150.642	7.49053e-45	188.98	1	194.753	3.73515e-59	215.79									1	204.23	3.10025e-191	295.03	1	176.654	8.33662e-40	176.65	1	111.975	2.12391e-132	265.27	N	QQAVPLEHPSSPWGLNLTEKIKKIKIVFTPT	X;X;X;X;X;X;X;X;X;X;X;X;X;X;X;Deamidation 18O (N);X;X;X;X;X;X;X;X;X;X;X;X;X;X;X
856	Q59EE6	Latent transforming growth factor beta binding protein 2 variant (Fragment)		Q59EE6	1	74.0191	2.27947e-11	124.98	116.12	124.98													1	74.0191	2.27947e-11	124.98																					N	IENGQLECPQGYKRLNLTHCQDINECLTLGL	X;X;X;X;X;X;X;X;X;X;X;X;X;X;X;Deamidation 18O (N);X;X;X;X;X;X;X;X;X;X;X;X;X;X;X
857	Q59EE6	Latent transforming growth factor beta binding protein 2 variant (Fragment)		Q59EE6	0.838599	7.15648	2.66424e-58	163.19	161.24	163.19									0.838599	7.15648	2.66424e-58	163.19																									N	RNVCGGQCCPGWTTANSTNHCIKPVCEPPCQ	X;X;X;X;X;X;X;X;X;X;X;X;X;X;X;Deamidation 18O (N);X;X;X;X;X;X;X;X;X;X;X;X;X;X;X
858	G3XAI2	Laminin subunit beta-1 (Laminin, beta 1, isoform CRA_a)	LAMB1 hCG_17112	G3XAI2	1	161.669	1.98352e-40	229.82	176.95	161.67													1	224.578	9.63362e-32	224.58	1	199.333	1.82529e-16	199.33	1	229.816	1.98352e-40	229.82	1	186.872	3.94072e-10	186.87	1	201.481	1.29422e-16	201.48	1	161.669	1.20025e-08	161.67	N	MAQVEVKLSDTTSQSNSTAKELDSLQTEAES	X;X;X;X;X;X;X;X;X;X;X;X;X;X;X;Deamidation 18O (N);X;X;X;X;X;X;X;X;X;X;X;X;X;X;X
859	G3XAI2	Laminin subunit beta-1 (Laminin, beta 1, isoform CRA_a)	LAMB1 hCG_17112	G3XAI2	1	228.803	2.08776e-55	228.8	201.83	228.8													1	228.803	2.08776e-55	228.8																					N	EVLKMEMPSTPQQLQNLTEDIRERVESLSQV	X;X;X;X;X;X;X;X;X;X;X;X;X;X;X;Deamidation 18O (N);X;X;X;X;X;X;X;X;X;X;X;X;X;X;X
860	G3XAI2	Laminin subunit beta-1 (Laminin, beta 1, isoform CRA_a)	LAMB1 hCG_17112	G3XAI2	1	77.0325	0.000183971	105	82.281	105													1	77.0325	0.000183971	105																					N	ITKYFQMSLEAEERVNASTTEPNSTVEQSAL	X;X;X;X;X;X;X;X;X;X;X;X;X;X;X;Deamidation 18O (N);X;X;X;X;X;X;X;X;X;X;X;X;X;X;X
861	G3XAP6	Cartilage oligomeric matrix protein (Cartilage oligomeric matrix protein, isoform CRA_b)	COMP hCG_37043	G3XAP6;Q53FR6	0.961562	13.9821	0.0178189	42.791	37.731	42.791																									0.961562	13.9821	0.0178189	42.791									N	IGDACDPDADGDGVPNEKDNCPLVRNPDQRN	X;X;X;X;X;X;X;X;X;X;X;X;X;X;X;Deamidation 18O (N);X;X;X;X;X;X;X;X;X;X;X;X;X;X;X
862	G3XAP6	Cartilage oligomeric matrix protein (Cartilage oligomeric matrix protein, isoform CRA_b)	COMP hCG_37043	G3XAP6;Q53FR6	1	267.925	1.81882e-136	282.62	267.42	267.93	1	156.796	7.67331e-28	156.8	1	282.622	1.81882e-136	282.62	1	172.755	2.91713e-14	172.76	1	153.753	1.87811e-14	153.75									1	222.99	9.16803e-124	222.99	1	267.925	3.16472e-101	267.93					N	RELLRQQVREITFLKNTVMECDACGMQQSVR	X;X;X;X;X;X;X;X;X;X;X;X;X;X;X;Deamidation 18O (N);X;X;X;X;X;X;X;X;X;X;X;X;X;X;X
863	Q7Z5M0	Collagenase 3 (Collagenase-3 deletion variant COL3-DEL)	MMP13	Q7Z5M0	1	126.037	0.00235395	126.04	87.045	126.04																													1	126.037	0.00235395	126.04					N	GEYNVFPRTLKWSKMNLTYRIVNYTPDMTHS	X;X;X;X;X;X;X;X;X;X;X;X;X;X;X;Deamidation 18O (N);X;X;X;X;X;X;X;X;X;X;X;X;X;X;X
864	Q7Z5M0	Collagenase 3 (Collagenase-3 deletion variant COL3-DEL)	MMP13	Q7Z5M0	1	166.863	1.06223e-06	185.96	140.8	166.86													1	169.577	2.00694e-05	169.58													1	185.96	1.06223e-06	185.96	1	166.863	1.7097e-05	166.86	N	AFKKAFKVWSDVTPLNFTRLHDGIADIMISF	X;X;X;X;X;X;X;X;X;X;X;X;X;X;X;Deamidation 18O (N);X;X;X;X;X;X;X;X;X;X;X;X;X;X;X
865	H0Y4I5	Chondroadherin-like protein (Fragment)	CHADL	H0Y4I5	1	265.225	8.16224e-248	265.22	207.88	265.22	1	167.985	2.70422e-20	167.98	1	206.182	6.93014e-31	206.18	1	205.606	1.43963e-30	205.61	1	222.293	3.72386e-45	222.29									1	263.7	4.03565e-109	263.7	1	239.389	3.98149e-67	239.39	1	265.225	8.16224e-248	265.22	N	CICDNSRRHVACRYQNLTEVPDAIPELTQRL	X;X;X;X;X;X;X;X;X;X;X;X;X;X;X;Deamidation 18O (N);X;X;X;X;X;X;X;X;X;X;X;X;X;X;X
866	H0Y512	Adipocyte plasma membrane-associated protein (Fragment)	APMAP	H0Y512	1	172.991	8.4417e-44	188.26	157.71	172.99	1	102.4	0.00318727	102.4	1	119.386	0.000341543	119.39	1	98.1563	0.00360215	98.156	1	188.261	7.61558e-12	188.26					1	73.8478	0.0133899	73.848	1	144.282	2.65689e-09	144.28	1	174.838	8.4417e-44	174.84	1	172.991	3.11282e-09	172.99	N	DEPVCGRPLGIRAGPNGTLFVADAYKGLFEV	X;X;X;X;X;X;X;X;X;X;X;X;X;X;X;Deamidation 18O (N);X;X;X;X;X;X;X;X;X;X;X;X;X;X;X
867	H0Y512	Adipocyte plasma membrane-associated protein (Fragment)	APMAP	H0Y512	1	132.973	5.94165e-29	211.67	163.23	211.67													1	132.973	5.94165e-29	211.67													1	123.995	1.36007e-16	188.26					N	EVKLLLSSETPIEGKNMSFVNDLTVTQDGRK	X;X;X;X;X;X;X;X;X;X;X;X;X;X;X;Deamidation 18O (N);X;X;X;X;X;X;X;X;X;X;X;X;X;X;X
868	H0Y7C8	Torsin-1B (Fragment)	TOR1B	H0Y7C8	1	82.4167	0.0104165	82.417	33.623	82.417													1	82.4167	0.0104165	82.417																					N	IYCRFAECCREERPLNASALKLDLEEKLFGQ	X;X;X;X;X;X;X;X;X;X;X;X;X;X;X;Deamidation 18O (N);X;X;X;X;X;X;X;X;X;X;X;X;X;X;X
869	H0YC24	Anthrax toxin receptor 1 (Fragment)	ANTXR1	H0YC24	1	146.785	6.11475e-13	146.79	125.25	146.79													1	89.542	0.0211749	89.542					1	69.8246	0.0396998	69.825					1	146.785	6.11475e-13	146.79					N	XDLGAIVYCVGVKDFNETQLARIADSKDHVF	X;X;X;X;X;X;X;X;X;X;X;X;X;X;X;Deamidation 18O (N);X;X;X;X;X;X;X;X;X;X;X;X;X;X;X
870	H0YD57	CD82 antigen (Fragment)	CD82	H0YD57	1	79.9739	0.0074609	111.04	100.62	79.974													1	85.8127	0.0228788	85.813													1	79.9739	0.0074609	111.04					N	DNSLSVRKGFCEAPGNRTQSGNHPEDWPVYQ	X;X;X;X;X;X;X;X;X;X;X;X;X;X;X;Deamidation 18O (N);X;X;X;X;X;X;X;X;X;X;X;X;X;X;X
871	H0YNA7	Signal peptide peptidase-like 2A (Fragment)	SPPL2A	H0YNA7	1	143.789	1.80826e-08	178.67	155.31	143.79													1	178.666	1.80826e-08	178.67													1	174.399	6.07971e-08	174.4	1	143.789	6.51966e-08	143.79	N	KILIAFISYKDFRDMNQTLGDNITVKMYSPS	X;X;X;X;X;X;X;X;X;X;X;X;X;X;X;Deamidation 18O (N);X;X;X;X;X;Deamidation 18O (N);X;X;X;X;X;X;X;X;X
872	H0YNA7	Signal peptide peptidase-like 2A (Fragment)	SPPL2A	H0YNA7	1	143.789	1.80826e-08	178.67	155.31	143.79													1	178.666	1.80826e-08	178.67													1	174.399	6.07971e-08	174.4	1	143.789	6.51966e-08	143.79	N	ISYKDFRDMNQTLGDNITVKMYSPSWPNFDY	X;X;X;X;X;X;X;X;X;Deamidation 18O (N);X;X;X;X;X;Deamidation 18O (N);X;X;X;X;X;X;X;X;X;X;X;X;X;X;X
873	P20702	Integrin alpha-X (CD11 antigen-like family member C) (Leu M5) (Leukocyte adhesion glycoprotein p150,95 alpha chain) (Leukocyte adhesion receptor p150,95) (CD antigen CD11c)	ITGAX CD11C	P20702	1	125.817	0.000372827	125.82	95.651	125.82													1	125.817	0.000372827	125.82																					N	VYTVVSSHEQFTKYLNFSESEEKESHVAMHR	X;X;X;X;X;X;X;X;X;X;X;X;X;X;X;Deamidation 18O (N);X;X;X;X;X;X;X;X;X;X;X;X;X;X;X
874	H7C0G1	Transmembrane protein 245 (Fragment)	TMEM245	H7C0G1	0.999996	54.4717	0.00196705	155.84	88.812	154.49	0.998918	29.6531	0.0295673	76.1	0.99978	36.5815	0.032679	74.173	0.998352	27.822	0.0325239	74.269	0.999899	39.9542	0.0118522	105.36									0.99996	43.9557	0.00196705	124.74	0.999996	53.7768	0.00295754	155.84	0.999996	54.4717	0.00270398	154.49	N	EWITHKLHKILGDKVNNTAVIEKQVLELWDR	X;X;X;X;X;X;X;X;X;X;X;X;X;X;X;Deamidation 18O (N);X;X;X;X;X;X;X;X;X;X;X;X;X;X;X
875	J3KPA2	TM2 domain containing 1, isoform CRA_c (TM2 domain-containing protein 1)	TM2D1 hCG_1780983	J3KPA2	1	111.947	0.00674781	111.95	71.844	111.95																					1	111.947	0.00674781	111.95													N	IIDYYGTRLTRLSITNETFRKTQLYP_____	X;X;X;X;X;X;X;X;X;X;X;X;X;X;X;Deamidation 18O (N);X;X;X;X;X;X;X;X;X;X;X;X;X;X;X
876	M0QYS6	Urokinase plasminogen activator surface receptor (Fragment)	PLAUR	M0QYS6	0.965331	13.0397	0.0231618	41.45	34.498	41.45																													0.965331	13.0397	0.0231618	41.45					N	RHLRGCGYLPGCPGSNGFHNNDTFHFLKCCN	X;X;X;X;X;X;X;X;X;X;X;X;X;X;X;Deamidation 18O (N);X;X;X;X;Deamidation 18O (N);X;X;X;X;X;X;X;X;X;X
877	M0QYS6	Urokinase plasminogen activator surface receptor (Fragment)	PLAUR	M0QYS6	0.732766	4.17024	0.0231618	41.45	34.498	41.45																													0.732766	4.17024	0.0231618	41.45					N	CGYLPGCPGSNGFHNNDTFHFLKCCNTTKCN	X;X;X;X;X;X;X;X;X;X;Deamidation 18O (N);X;X;X;X;Deamidation 18O (N);X;X;X;X;X;X;X;X;X;X;X;X;X;X;X
878	M0QZH0	Reticulocalbin-3 (Fragment)	RCN3	M0QZH0	1	108.444	7.36902e-133	266.46	258.06	108.44									1	59.5386	0.00731832	59.539	1	234.547	4.45985e-89	234.55									1	266.46	7.36902e-133	266.46	1	166.915	2.1435e-77	232.44	1	108.444	3.31721e-89	236.82	N	YDTDRDGRVGWEELRNATYGHYAPGEEFHDV	X;X;X;X;X;X;X;X;X;X;X;X;X;X;X;Deamidation 18O (N);X;X;X;X;X;X;X;X;X;X;X;X;X;X;X
879	O00300	Tumor necrosis factor receptor superfamily member 11B (Osteoclastogenesis inhibitory factor) (Osteoprotegerin)	TNFRSF11B OCIF OPG	O00300	1	167.199	2.95781e-109	272.32	265.43	167.2	1	259.347	2.38694e-78	259.35	1	82.1708	2.95781e-109	272.32	1	71.5551	2.07123e-64	244.71	1	199.185	3.84744e-83	199.19									1	215.077	1.92284e-100	215.08					1	167.199	1.69762e-08	167.2	N	ERNTVCKRCPDGFFSNETSSKAPCRKHTNCS	X;X;X;X;X;X;X;X;X;X;X;X;X;X;X;Deamidation 18O (N);X;X;X;X;X;X;X;X;X;X;X;X;Deamidation 18O (N);X;X
880	O00300	Tumor necrosis factor receptor superfamily member 11B (Osteoclastogenesis inhibitory factor) (Osteoprotegerin)	TNFRSF11B OCIF OPG	O00300	0.999994	52.2872	2.1173e-30	197.94	192.04	181.4	0.974863	15.8863	5.02828e-15	146.81	0.999513	33.127	2.1173e-30	197.94	0.999962	44.2416	8.34848e-26	192.6									0.699319	3.66569	0.000638301	88.319	0.981506	17.2487	0.000683073	96.444	0.999994	52.2872	1.64314e-22	181.4	0.999984	48.0541	1.64314e-22	181.4	N	HTNCSVFGLLLTQKGNATHDNICSGNSESTQ	X;X;Deamidation 18O (N);X;X;X;X;X;X;X;X;X;X;X;X;Deamidation 18O (N);X;X;X;X;X;X;X;X;X;Deamidation 18O (N);X;X;X;X;X
881	O00300	Tumor necrosis factor receptor superfamily member 11B (Osteoclastogenesis inhibitory factor) (Osteoprotegerin)	TNFRSF11B OCIF OPG	O00300	0.61266	1.99127	1.61691e-05	86.367	77.866	86.367																	0.61266	1.99127	1.61691e-05	86.367																	N	VFGLLLTQKGNATHDNICSGNSESTQKCGID	X;X;X;X;X;X;X;X;X;X;X;X;X;X;X;Deamidation 18O (N);X;X;X;X;X;X;X;X;X;X;X;X;X;X;X
882	O00300	Tumor necrosis factor receptor superfamily member 11B (Osteoclastogenesis inhibitory factor) (Osteoprotegerin)	TNFRSF11B OCIF OPG	O00300	0.998844	29.1627	0.00260035	68.82	59.414	68.82	0.998844	29.1627	0.00260035	68.82																																	N	LTQKGNATHDNICSGNSESTQKCGIDVTLCE	X;X;X;X;X;Deamidation 18O (N);X;X;X;X;X;X;X;X;X;Deamidation 18O (N);X;X;X;X;X;X;X;X;X;X;X;X;X;X;X
883	O00300	Tumor necrosis factor receptor superfamily member 11B (Osteoclastogenesis inhibitory factor) (Osteoprotegerin)	TNFRSF11B OCIF OPG	O00300	1	228.606	1.12913e-82	245.15	224.29	228.61	1	197.315	5.29434e-52	237.27	1	62.528	3.22481e-41	232.6	1	80.2447	8.59925e-65	245.15	1	84.17	1.05951e-40	228.87	1	74.7805	0.00866561	74.78	1	129.742	4.11428e-05	129.74	1	226.532	1.12913e-82	226.53	1	73.9513	4.605e-52	238.07	1	228.606	1.11095e-40	228.61	N	IDLCENSVQRHIGHANLTFEQLRSLMESLPG	X;X;X;X;X;X;X;X;X;X;X;X;X;X;X;Deamidation 18O (N);X;X;X;X;X;X;X;X;X;X;X;X;X;X;X
884	O00300	Tumor necrosis factor receptor superfamily member 11B (Osteoclastogenesis inhibitory factor) (Osteoprotegerin)	TNFRSF11B OCIF OPG	O00300	1	103.604	1.50149e-298	350.02	307.83	103.6	1	326.946	1.73805e-241	326.95	1	350.019	1.50149e-298	350.02	1	300.223	3.65045e-169	300.22	1	49.5946	0.0363449	49.595									1	103.604	0.000687428	103.6									N	FSNETSSKAPCRKHTNCSVFGLLLTQKGNAT	X;X;Deamidation 18O (N);X;X;X;X;X;X;X;X;X;X;X;X;Deamidation 18O (N);X;X;X;X;X;X;X;X;X;X;X;X;Deamidation 18O (N);X;X
885	O00468	Agrin [Cleaved into: Agrin N-terminal 110 kDa subunit; Agrin C-terminal 110 kDa subunit; Agrin C-terminal 90 kDa fragment (C90); Agrin C-terminal 22 kDa fragment (C22)]	AGRN AGRIN	O00468	1	76.0689	0.00979962	83	50.394	83													1	76.0689	0.00979962	83																					N	APPYLWPAHKNELMLNSSLMRITLRNLEEVE	X;X;X;X;X;X;X;X;X;X;X;X;X;X;X;Deamidation 18O (N);X;X;X;X;X;X;X;X;X;X;X;X;X;X;X
886	O15031	Plexin-B2 (MM1)	PLXNB2 KIAA0315	O15031	1	136.327	3.45805e-14	136.33	129.12	136.33													1	136.327	3.45805e-14	136.33																					N	AWCGGQSRCVYEALCNTTSECPPPVITRIQP	X;X;X;X;X;X;X;X;X;X;X;X;X;X;X;Deamidation 18O (N);X;X;X;X;X;X;X;X;X;X;X;X;X;X;X
887	O15031	Plexin-B2 (MM1)	PLXNB2 KIAA0315	O15031	1	51.2649	0.000891497	85.493	77.845	51.265													1	85.493	0.000891497	85.493													1	51.2649	0.0223398	51.265					N	SGTFAFRTPKLSHDANETLPLHLYVKSYGKN	X;X;X;X;X;X;X;X;X;X;X;X;X;X;X;Deamidation 18O (N);X;X;X;X;X;X;X;X;X;X;X;X;X;X;X
888	O15031	Plexin-B2 (MM1)	PLXNB2 KIAA0315	O15031	1	207.877	1.90602e-104	207.88	174.79	207.88													1	207.877	1.90602e-104	207.88																					N	SRSKSCVAVTSAQPQNMSRRAQGEVQLTVSP	X;X;X;X;X;X;X;X;X;X;X;X;X;X;X;Deamidation 18O (N);X;X;X;X;X;X;X;X;X;X;X;X;X;X;X
889	O15031	Plexin-B2 (MM1)	PLXNB2 KIAA0315	O15031	1	212.875	3.22635e-94	212.87	170.09	212.87													1	212.875	3.22635e-94	212.87																					N	TEAGAFEYVPDPTFENFTGGVKKQVNKLIHA	X;X;X;X;X;X;X;X;X;X;X;X;X;X;X;Deamidation 18O (N);X;X;X;X;X;X;X;X;X;X;X;X;X;X;X
890	O15230	Laminin subunit alpha-5 (Laminin-10 subunit alpha) (Laminin-11 subunit alpha) (Laminin-15 subunit alpha)	LAMA5 KIAA0533 KIAA1907	O15230	1	187.309	2.8073e-10	187.31	140.12	187.31													1	118.483	0.000749803	118.48													1	187.309	2.8073e-10	187.31					N	GINASSMAWARLHRLNASIADLQSQLRSPLG	X;X;X;X;X;X;X;X;X;X;X;X;X;X;X;Deamidation 18O (N);X;X;X;X;X;X;X;X;X;X;X;X;X;X;X
891	O15230	Laminin subunit alpha-5 (Laminin-10 subunit alpha) (Laminin-11 subunit alpha) (Laminin-15 subunit alpha)	LAMA5 KIAA0533 KIAA1907	O15230	1	190.277	4.74745e-108	190.28	166.12	190.28																													1	190.277	4.74745e-108	190.28					N	TLSELMSQTGHLGLANASAPSGEQLLRTLAE	X;X;X;X;X;X;X;X;X;X;X;X;X;X;X;Deamidation 18O (N);X;X;X;X;X;X;X;X;X;X;X;X;X;X;X
892	Q05DA4	p4HA2 protein	P4HA2	Q05DA4	1	279.972	2.60642e-256	316.71	275.63	279.97	1	75.2264	0.000305005	75.226					1	81.8386	0.000135904	81.839	1	112.878	2.06546e-07	112.88									1	316.714	2.60642e-256	316.71					1	279.972	1.99549e-166	279.97	N	YFEQLLEEEREKTLTNQTEAELATPEGIYER	X;X;X;X;X;X;X;X;X;X;X;X;X;X;X;Deamidation 18O (N);X;X;X;X;X;X;X;X;X;X;X;X;X;X;X
893	O43157	Plexin-B1 (Semaphorin receptor SEP)	PLXNB1 KIAA0407 PLXN5 SEP	O43157	1	71.5551	0.016511	71.555	42.828	71.555													1	71.5551	0.016511	71.555																					N	ERRLQRGQFKYTLDPNITSAGPTKSFLSGGR	X;X;X;X;X;X;X;X;X;X;X;X;X;X;X;Deamidation 18O (N);X;X;X;X;X;X;X;X;X;X;X;X;X;X;X
894	O43827	Angiopoietin-related protein 7 (Angiopoietin-like factor) (Angiopoietin-like protein 7) (Cornea-derived transcript 6 protein)	ANGPTL7 CDT6 UNQ313/PRO356	O43827	1	104.437	0.00203086	135.83	109.23	104.44													1	101.253	0.0146144	101.25	1	114.281	0.00707149	114.28	1	82.4258	0.0242981	82.426	1	78.5161	0.0259365	78.516	1	135.83	0.00203086	135.83	1	104.437	0.0181306	104.44	N	LSKHKTPAQPQLKAANCCEEVKELKAQVANL	X;X;X;X;X;X;X;X;X;X;X;X;X;X;X;Deamidation 18O (N);X;X;X;X;X;X;X;X;X;X;X;X;X;Deamidation 18O (N);X
895	O43827	Angiopoietin-related protein 7 (Angiopoietin-like factor) (Angiopoietin-like protein 7) (Cornea-derived transcript 6 protein)	ANGPTL7 CDT6 UNQ313/PRO356	O43827	1	177.551	1.9908e-71	244.47	219.09	244.47	1	82.722	6.49148e-20	150.06									1	142.796	5.68406e-37	218.3	1	111.637	1.45053e-13	168.98	1	71.8267	2.78509e-06	119.39	1	95.4427	8.51727e-14	156.8	1	177.551	1.9908e-71	244.47	1	120.082	5.94165e-29	211.67	N	ANCCEEVKELKAQVANLSSLLSELNKKQERD	X;Deamidation 18O (N);X;X;X;X;X;X;X;X;X;X;X;X;X;Deamidation 18O (N);X;X;X;X;X;X;X;X;X;X;X;X;X;X;X
896	O43827	Angiopoietin-related protein 7 (Angiopoietin-like factor) (Angiopoietin-like protein 7) (Cornea-derived transcript 6 protein)	ANGPTL7 CDT6 UNQ313/PRO356	O43827	1	64.2632	3.00408e-54	187.81	181.17	184.26	0.999758	36.2493	1.98927e-15	131.37									0.96854	15.0893	1.27099e-17	114.15	1	64.2632	2.21874e-53	184.26	0.999999	59.1189	3.86895e-51	173.47					0.999998	57.8802	3.00408e-54	187.81					N	FVLGNELNSYRLFLGNYTGNVGNDALQYHNN	X;X;X;X;X;X;X;X;X;X;X;X;X;X;X;Deamidation 18O (N);X;X;X;Deamidation 18O (N);X;X;X;X;X;X;X;X;X;Deamidation 18O (N);X
897	O43827	Angiopoietin-related protein 7 (Angiopoietin-like factor) (Angiopoietin-like protein 7) (Cornea-derived transcript 6 protein)	ANGPTL7 CDT6 UNQ313/PRO356	O43827	0.981597	17.2844	3.56308e-19	105.61	91.549	105.61																													0.981597	17.2844	3.56308e-19	105.61					N	NELNSYRLFLGNYTGNVGNDALQYHNNTAFS	X;X;X;X;X;X;X;X;X;X;X;Deamidation 18O (N);X;X;X;Deamidation 18O (N);X;X;X;X;X;X;X;X;X;Deamidation 18O (N);X;X;X;X;X
898	O43827	Angiopoietin-related protein 7 (Angiopoietin-like factor) (Angiopoietin-like protein 7) (Cornea-derived transcript 6 protein)	ANGPTL7 CDT6 UNQ313/PRO356	O43827	0.893428	9.23419	3.00408e-54	187.81	181.17	187.81	0.879663	8.63966	1.98927e-15	131.37									0.813696	6.40643	1.27099e-17	114.15	0.891275	9.13682	2.21874e-53	184.26	0.859093	7.85109	3.86895e-51	173.47					0.893428	9.23419	3.00408e-54	187.81					N	GNYTGNVGNDALQYHNNTAFSTKDKDNDNCL	X;Deamidation 18O (N);X;X;X;Deamidation 18O (N);X;X;X;X;X;X;X;X;X;Deamidation 18O (N);X;X;X;X;X;X;X;X;X;X;X;X;X;X;X
899	O43854	EGF-like repeat and discoidin I-like domain-containing protein 3 (Developmentally-regulated endothelial cell locus 1 protein) (Integrin-binding protein DEL1)	EDIL3 DEL1	O43854	1	185.947	1.23878e-82	185.95	173.59	185.95																													1	132.509	1.809e-21	132.51	1	185.947	1.23878e-82	185.95	N	HCQHNINECEVEPCKNGGICTDLVANYSCEC	X;X;X;X;X;X;X;X;X;X;X;X;X;X;X;Deamidation 18O (N);X;X;X;X;X;X;X;X;X;Deamidation 18O (N);X;X;X;X;X
900	O43854	EGF-like repeat and discoidin I-like domain-containing protein 3 (Developmentally-regulated endothelial cell locus 1 protein) (Integrin-binding protein DEL1)	EDIL3 DEL1	O43854	1	185.947	1.23878e-82	185.95	173.59	185.95																													1	132.509	1.809e-21	132.51	1	185.947	1.23878e-82	185.95	N	VEPCKNGGICTDLVANYSCECPGEFMGRNCQ	X;X;X;X;X;Deamidation 18O (N);X;X;X;X;X;X;X;X;X;Deamidation 18O (N);X;X;X;X;X;X;X;X;X;X;X;X;X;X;X
901	O43854	EGF-like repeat and discoidin I-like domain-containing protein 3 (Developmentally-regulated endothelial cell locus 1 protein) (Integrin-binding protein DEL1)	EDIL3 DEL1	O43854	0.999998	57.4604	4.05918e-06	128.85	109.72	107.09	0.995615	23.561	0.0299869	59.155	0.99994	42.229	0.00212906	103.46	0.999998	57.4604	0.00211662	107.09																	0.999996	54.2361	4.05918e-06	128.85	0.999961	44.1397	0.0012433	111.52	N	DEKQRKDKVFQGNFDNDTHRKNVIDPPIYAR	X;X;X;X;X;X;X;X;X;X;X;X;X;X;X;Deamidation 18O (N);X;X;X;X;X;X;X;X;X;X;X;X;X;X;X
902	Q59H44	Lymphocyte antigen 75 variant (Fragment)		Q59H44	0.894845	9.29944	0.0207946	96.253	49.186	96.253													0.894845	9.29944	0.0207946	96.253									0.820616	6.60374	0.0371062	86.833									N	EDENKFVSRLMRENNNITMRVWLGLSQHSVD	X;X;X;X;X;X;X;X;X;X;X;X;X;X;X;Deamidation 18O (N);X;X;X;X;X;X;X;X;X;X;X;X;X;X;X
903	Q59H44	Lymphocyte antigen 75 variant (Fragment)		Q59H44	1	125.981	3.65051e-05	125.98	75.854	125.98													1	86.6702	0.0151986	86.67									1	125.981	3.65051e-05	125.98									N	ITSFVGLKAIKNKIANISGDGQKWWIRISEW	X;X;X;X;X;X;X;X;X;X;X;X;X;X;X;Deamidation 18O (N);X;X;X;X;X;X;X;X;X;X;X;X;X;X;X
904	O60687	Sushi repeat-containing protein SRPX2 (Sushi-repeat protein upregulated in leukemia)	SRPX2 SRPUL	O60687	0.99999	50.2444	2.3204e-45	220.99	191.44	220.99																									0.990462	20.3522	2.52425e-18	136.17	0.999847	38.1775	5.77309e-37	211.51	0.99999	50.2444	2.3204e-45	220.99	N	WSGSPPICAPMKINVNVNSAAGLLDQFYEKQ	X;X;X;X;X;X;X;X;X;X;X;X;X;X;X;Deamidation 18O (N);X;X;X;X;X;X;X;X;X;X;X;X;X;X;X
905	O75106	Retina-specific copper amine oxidase (RAO) (EC 1.4.3.21) (Amine oxidase [copper-containing]) (Semicarbazide-sensitive amine oxidase) (SSAO)	AOC2	O75106	0.999981	47.261	1.57839e-14	166.6	135.64	144.68													0.999981	47.261	2.22102e-12	144.68	0.997873	26.7127	0.00130364	81.311									0.999952	43.2139	1.57839e-14	166.6	0.99056	20.2093	0.00468821	71.98	N	FSLGSPLPRYLYLASNQTNAWGHQRGYRIQI	X;X;X;X;X;X;X;X;X;X;X;X;X;X;X;Deamidation 18O (N);X;X;X;X;X;X;X;X;X;X;X;X;X;X;X
906	O75294	Chromosome 19 open reading frame 15, isoform CRA_e (R27328_1)	C19orf15 hCG_1642159	O75294	0.642344	2.54302	0.0126185	72.643	37.922	72.643	0.5	0	0.0262956	63.283									0.5	0	0.0181876	68.657									0.642344	2.54302	0.0126185	72.643									N	GGPGGGGRDRNLAGMNINGFLKRDRDNNIQF	X;X;X;X;X;X;X;X;X;X;X;X;X;X;Oxidation (M);Deamidation 18O (N);X;X;X;X;X;X;X;X;X;X;X;X;X;X;X
907	O75294	Chromosome 19 open reading frame 15, isoform CRA_e (R27328_1)	C19orf15 hCG_1642159	O75294	0.5	0	0.0181876	68.657	33.005	68.657	0.5	0	0.0262956	63.283									0.5	0	0.0181876	68.657																					N	PGGGGRDRNLAGMNINGFLKRDRDNNIQFTV	X;X;X;X;X;X;X;X;X;X;X;X;X;X;X;X;X;X;X;X;X;X;X;X;X;X;X;X;X;X;X
908	O75339	Cartilage intermediate layer protein 1 (CILP-1) (Cartilage intermediate-layer protein) [Cleaved into: Cartilage intermediate layer protein 1 C1; Cartilage intermediate layer protein 1 C2]	CILP UNQ602/PRO1188	O75339	1	121.93	3.45716e-05	143.22	118.4	121.93	1	123.625	0.000132345	123.63	1	143.216	3.55987e-05	143.22	1	138.233	3.51268e-05	138.23	1	141.954	3.67265e-05	141.95	1	96.8898	0.00556273	96.89	1	96.8898	0.00556273	96.89	1	136.941	3.45716e-05	136.94	1	110.179	0.00274897	110.18	1	121.93	0.000333558	121.93	N	AGQQDNGIRCRDAVQNCCGISKTEEREIQCS	X;X;X;X;X;X;X;X;X;X;X;X;X;X;X;Deamidation 18O (N);X;X;X;X;X;X;X;X;X;X;X;X;X;X;X
909	O75339	Cartilage intermediate layer protein 1 (CILP-1) (Cartilage intermediate-layer protein) [Cleaved into: Cartilage intermediate layer protein 1 C1; Cartilage intermediate layer protein 1 C2]	CILP UNQ602/PRO1188	O75339	1	158.173	6.5169e-156	293.95	268.57	158.17	1	176.321	2.59317e-13	176.32	1	222.752	9.30857e-37	222.75	1	293.955	6.5169e-156	293.95	1	129.876	3.06216e-10	136.96					1	82.9421	0.00358519	82.942	1	171.484	1.25819e-13	171.48	1	146.857	1.26494e-11	152.7	1	158.173	3.15806e-46	227.92	N	YGIRDVRSTRDRDQPNVSAACLEFKCSGMLY	X;X;X;X;X;X;X;X;X;X;X;X;X;X;X;Deamidation 18O (N);X;X;X;X;X;X;X;X;X;X;X;X;X;X;X
910	O75339	Cartilage intermediate layer protein 1 (CILP-1) (Cartilage intermediate-layer protein) [Cleaved into: Cartilage intermediate layer protein 1 C1; Cartilage intermediate layer protein 1 C2]	CILP UNQ602/PRO1188	O75339	1	124.232	2.10481e-110	274.45	239.76	274.45	0.999992	50.7147	0.00164616	96.707	1	82.6719	3.52664e-12	188.25	1	75.8255	3.11277e-31	218.02	0.999942	42.3737	0.00248031	82.651	1	109.379	1.12397e-23	209.21	1	104.876	4.57769e-79	257.04	1	108.751	2.75257e-95	270.85	1	124.232	2.10481e-110	274.45	1	100.011	2.98562e-94	268.9	N	REGFWCLNREQRPGQNCSNYTVRFLCPPGSL	X;X;X;X;X;X;X;X;X;X;X;X;X;X;X;Deamidation 18O (N);X;X;X;X;X;X;X;X;X;X;X;X;X;X;X
911	O75339	Cartilage intermediate layer protein 1 (CILP-1) (Cartilage intermediate-layer protein) [Cleaved into: Cartilage intermediate layer protein 1 C1; Cartilage intermediate layer protein 1 C2]	CILP UNQ602/PRO1188	O75339	1	82.2626	0.000478608	150.02	63.933	82.263					1	111.687	0.0344713	111.69					1	150.02	0.000478608	150.02	1	106.761	0.0198341	106.76					1	106.761	0.0198341	106.76	1	80.5551	0.0417835	80.555	1	82.2626	0.0385555	82.263	N	ERLVLTFVDRLQKFVNTTKVLPFNKKGSAVF	X;X;X;X;X;X;X;X;X;X;X;X;X;X;X;Deamidation 18O (N);X;X;X;X;X;X;X;X;X;X;X;X;X;X;X
912	O75339	Cartilage intermediate layer protein 1 (CILP-1) (Cartilage intermediate-layer protein) [Cleaved into: Cartilage intermediate layer protein 1 C1; Cartilage intermediate layer protein 1 C2]	CILP UNQ602/PRO1188	O75339	1	88.0923	0	458.41	441.94	88.092	1	77.3901	4.98164e-70	207.5	1	80.9749	2.29177e-54	217.79	1	50.8827	7.51623e-280	332.36	1	58.0727	2.09979e-31	186.67	0.999994	52.5919	5.10808e-25	153.36	1	50.3582	1.10953e-31	187.47	1	88.0923	2.69303e-46	213.83	1	115.605	0	458.41	1	76.7574	1.40918e-177	291.37	N	VPESYLIRLPHDCFQNATNSFYYDVGRCPVK	X;X;X;X;X;X;X;X;X;X;X;X;X;X;X;Deamidation 18O (N);X;X;Deamidation 18O (N);X;X;X;X;X;X;X;X;X;X;X;X
913	O75339	Cartilage intermediate layer protein 1 (CILP-1) (Cartilage intermediate-layer protein) [Cleaved into: Cartilage intermediate layer protein 1 C1; Cartilage intermediate layer protein 1 C2]	CILP UNQ602/PRO1188	O75339	1	88.0923	3.04008e-15	127.71	114	88.092	1	77.3901	3.04008e-15	127.71	1	80.9749	1.47738e-05	80.975	1	50.8827	0.00398944	65.423	1	58.0727	0.00978251	58.073					1	50.3582	0.0192815	50.358	1	88.0923	6.2767e-07	88.092									N	SYLIRLPHDCFQNATNSFYYDVGRCPVKTCA	X;X;X;X;X;X;X;X;X;X;X;X;Deamidation 18O (N);X;X;Deamidation 18O (N);X;X;X;X;X;X;X;X;X;X;X;X;X;X;X
914	O75339	Cartilage intermediate layer protein 1 (CILP-1) (Cartilage intermediate-layer protein) [Cleaved into: Cartilage intermediate layer protein 1 C1; Cartilage intermediate layer protein 1 C2]	CILP UNQ602/PRO1188	O75339	1	319.436	0	455.05	416.25	455.05	1	228.375	1.68883e-228	300.56	1	222.462	1.08814e-228	303.07	1	147.787	5.8063e-90	229.1													1	189.503	0	410.55	1	264.379	0	368.64	1	319.436	0	455.05	N	YIGKVKASVTFLDPRNISTATAAQTDLNFIN	X;X;X;X;X;X;X;X;X;X;X;X;X;X;X;Deamidation 18O (N);X;X;X;X;X;X;X;X;X;X;X;Deamidation 18O (N);X;X;X
915	O75339	Cartilage intermediate layer protein 1 (CILP-1) (Cartilage intermediate-layer protein) [Cleaved into: Cartilage intermediate layer protein 1 C1; Cartilage intermediate layer protein 1 C2]	CILP UNQ602/PRO1188	O75339	0.967322	14.7066	1.28696e-33	135.47	116.39	57.52																									0.967322	14.7066	0.0192647	57.52					0.5	0	1.28696e-33	135.47	N	DPRNISTATAAQTDLNFINDEGDTFPLRTYG	X;X;X;Deamidation 18O (N);X;X;X;X;X;X;X;X;X;X;X;Deamidation 18O (N);X;X;X;X;X;X;X;X;X;X;X;X;X;X;X
916	O75339	Cartilage intermediate layer protein 1 (CILP-1) (Cartilage intermediate-layer protein) [Cleaved into: Cartilage intermediate layer protein 1 C1; Cartilage intermediate layer protein 1 C2]	CILP UNQ602/PRO1188	O75339	0.5	0	1.28696e-33	135.47	116.39	135.47																																	0.5	0	1.28696e-33	135.47	N	NISTATAAQTDLNFINDEGDTFPLRTYGMFS	X;X;X;X;X;X;X;X;X;X;X;X;X;X;X;X;X;X;X;X;X;X;X;X;X;X;X;X;X;X;X
917	O75339	Cartilage intermediate layer protein 1 (CILP-1) (Cartilage intermediate-layer protein) [Cleaved into: Cartilage intermediate layer protein 1 C1; Cartilage intermediate layer protein 1 C2]	CILP UNQ602/PRO1188	O75339	1	51.1468	1.04168e-202	308.74	261.18	51.147	1	58.6706	2.43673e-48	233.37	1	135.09	3.99266e-72	246.53	1	109.6	4.1171e-37	178	1	147.695	1.26643e-12	147.7	1	97.2911	0.0011134	97.291	1	51.2649	1.03238e-15	180.64	1	139.669	6.89238e-118	273.87	1	100.773	1.04168e-202	308.74	1	51.1468	1.17443e-47	230.06	N	KATGKPRPDKYFWYHNDTLLDPSLYKHESKL	X;X;X;X;X;X;X;X;X;X;X;X;X;X;X;Deamidation 18O (N);X;X;X;X;X;X;X;X;X;X;X;X;X;X;X
918	O75462	Cytokine receptor-like factor 1 (Cytokine-like factor 1) (CLF-1) (ZcytoR5)	CRLF1 UNQ288/PRO327	O75462	1	184.873	1.21067e-36	214.18	181.09	214.18					1	92.6307	1.98494e-06	123.07					1	81.5525	0.000156998	104.88													1	184.873	1.21067e-36	214.18	1	156.63	1.37107e-21	183.6	N	TLNGRRLPPELSRVLNASTLALALANLNGSR	X;X;X;X;X;X;X;X;X;X;X;X;X;X;X;Deamidation 18O (N);X;X;X;X;X;X;X;X;X;X;X;Deamidation 18O (N);X;X;X
919	O75462	Cytokine receptor-like factor 1 (Cytokine-like factor 1) (CLF-1) (ZcytoR5)	CRLF1 UNQ288/PRO327	O75462	0.943759	12.2481	1.21067e-36	214.18	181.09	104.88					0.913356	10.229	1.98494e-06	123.07					0.943759	12.2481	0.000156998	104.88													0.878617	8.59639	1.21067e-36	214.18	0.790081	5.7562	1.37107e-21	183.6	N	RVLNASTLALALANLNGSRQRSGDNLVCHAR	X;X;X;Deamidation 18O (N);X;X;X;X;X;X;X;X;X;X;X;Deamidation 18O (N);X;X;X;X;X;X;X;X;X;X;X;X;X;X;X
920	O75462	Cytokine receptor-like factor 1 (Cytokine-like factor 1) (CLF-1) (ZcytoR5)	CRLF1 UNQ288/PRO327	O75462	1	191.4	4.78428e-72	255.07	235.08	191.4	1	88.6806	0.000764896	119.53	1	108.667	2.85904e-35	226.4	1	168.738	1.91499e-05	168.74	1	250.723	2.30378e-59	250.72	1	130.982	6.89817e-05	130.98	1	158.79	9.50993e-06	158.79	1	240.379	1.24395e-46	240.38	1	255.073	4.78428e-72	255.07	1	191.4	1.24395e-46	240.38	N	RVEDSVDWKVVDDVSNQTSCRLAGLKPGTVY	X;X;X;X;X;X;X;X;X;X;X;X;X;X;X;Deamidation 18O (N);X;X;X;X;X;X;X;X;X;X;X;X;X;X;X
921	O75462	Cytokine receptor-like factor 1 (Cytokine-like factor 1) (CLF-1) (ZcytoR5)	CRLF1 UNQ288/PRO327	O75462	1	93.8124	2.81448e-05	111.18	101.42	93.812					1	76.3005	0.00179392	76.301	1	55.2672	0.0160327	55.267	1	47.2216	2.81448e-05	111.18	1	42.5798	0.0342866	42.58	1	64.7047	0.00819021	64.705	1	93.8124	0.00067349	93.812									N	CRWTPGAHGETFLHTNYSLKYKLRWYGQDNT	X;X;X;X;X;X;X;X;X;X;X;X;X;X;X;Deamidation 18O (N);X;X;X;X;X;X;X;X;X;X;X;X;X;X;X
922	O75829	Leukocyte cell-derived chemotaxin 1 (Chondromodulin) [Cleaved into: Chondrosurfactant protein (CH-SP); Chondromodulin-1 (Chondromodulin-I) (ChM-I)]	CNMD CHMI LECT1 MYETS1	O75829	0.989152	19.9287	5.99362e-78	178.33	164.51	73.657					0.525754	0.447819	4.74308e-09	70.073	0.983663	18.0267	0.000186234	48.405	0.989152	19.9287	2.1747e-11	73.657													0.846963	6.69526	4.05514e-07	67.571	0.549622	0.864865	5.99362e-78	178.33	N	RPHSGPRSNPGAGRLNNETRPSVQEDSQAFN	X;X;X;X;X;X;X;X;X;X;X;X;X;X;X;Deamidation 18O (N);Deamidation 18O (N);X;X;X;X;X;X;X;X;X;X;X;X;X;X
923	O75829	Leukocyte cell-derived chemotaxin 1 (Chondromodulin) [Cleaved into: Chondrosurfactant protein (CH-SP); Chondromodulin-1 (Chondromodulin-I) (ChM-I)]	CNMD CHMI LECT1 MYETS1	O75829	0.993983	22.1803	7.54414e-149	251.04	232.3	212.66	0.968412	14.8653	1.47182e-51	158.62	0.981126	17.1586	4.26208e-77	173.05	0.993983	22.1803	4.41784e-101	212.66	0.989152	19.9287	7.18907e-24	124.37									0.950598	12.8425	7.54414e-149	251.04	0.846963	6.69526	4.17021e-40	143.48	0.988357	19.2885	5.80575e-51	152.05	N	PHSGPRSNPGAGRLNNETRPSVQEDSQAFNP	X;X;X;X;X;X;X;X;X;X;X;X;X;X;Deamidation 18O (N);Deamidation 18O (N);X;X;X;X;X;X;X;X;X;X;X;X;X;X;X
924	O75976	Carboxypeptidase D (EC 3.4.17.22) (Metallocarboxypeptidase D) (gp180)	CPD	O75976	0.999998	56.9796	0.0126597	63.062	32.623	63.062																													0.999998	56.9796	0.0126597	63.062					N	AAGYRRGDPRLVRLLNTTDVYLLPSLNPDGF	X;X;X;X;X;X;X;X;X;X;X;X;X;X;X;Deamidation 18O (N);X;X;X;X;X;X;X;X;X;X;X;X;X;X;X
925	O95631	Netrin-1 (Epididymis tissue protein Li 131P)	NTN1 NTN1L	O95631	1	146.17	3.60941e-05	146.17	102.95	146.17					1	80.3185	0.00555595	80.318					1	84.8205	0.00346221	84.821									1	66.0227	3.60941e-05	140.48	1	129.819	4.69139e-05	129.82	1	146.17	0.000790004	146.17	N	VSERGEERLRSCHLCNASDPKKAHPPAFLTD	X;X;X;X;X;X;X;X;X;X;X;X;X;X;X;Deamidation 18O (N);X;X;X;X;X;X;X;X;X;X;X;X;X;X;X
926	O95631	Netrin-1 (Epididymis tissue protein Li 131P)	NTN1 NTN1L	O95631	1	268.735	0	313.01	292.7	268.73					1	313.006	0	313.01					1	211.778	9.45543e-19	211.78	1	117.526	0.000994816	117.53	1	145.886	9.50674e-06	145.89	1	239.935	1.42641e-46	239.93	1	230.064	2.03456e-75	230.06	1	268.735	1.18351e-86	268.73	N	KACDCHPVGAAGKTCNQTTGQCPCKDGVTGI	X;X;X;X;X;X;X;X;X;X;X;X;X;X;X;Deamidation 18O (N);X;X;X;X;X;X;X;X;X;X;X;X;X;X;X
927	P01023	Alpha-2-macroglobulin (Alpha-2-M) (C3 and PZP-like alpha-2-macroglobulin domain-containing protein 5)	A2M CPAMD5 FWP007	P01023	1	45.3692	1.63486e-11	100.45	72.485	45.369					1	61.7031	0.00453429	61.703									1	100.454	1.63486e-11	100.45													1	45.3692	0.0149179	65.092	N	HTETTEKGCVLLSYLNETVTVSASLESVRGN	X;X;X;X;X;X;X;X;X;X;X;X;X;X;X;Deamidation 18O (N);X;X;X;X;X;X;X;X;X;X;X;X;X;X;X
928	P01023	Alpha-2-macroglobulin (Alpha-2-M) (C3 and PZP-like alpha-2-macroglobulin domain-containing protein 5)	A2M CPAMD5 FWP007	P01023	0.999994	51.9196	7.60112e-78	198.02	182.5	198.02													0.999994	51.9196	7.60112e-78	198.02																					N	QTVSWAVTPKSLGNVNFTVSAEALESQELCG	X;X;X;X;X;X;X;X;X;X;X;X;X;X;X;Deamidation 18O (N);X;X;X;X;X;X;X;X;X;X;X;X;X;X;X
929	P01871	Immunoglobulin heavy constant mu (Ig mu chain C region) (Ig mu chain C region BOT) (Ig mu chain C region GAL) (Ig mu chain C region OU)	IGHM	P01871	1	138.811	0	439.77	411.41	138.81					1	275.226	4.27824e-138	275.23	1	161.841	3.70801e-29	161.84	1	334.786	0	386.49					1	189.685	1.76844e-34	189.69	1	188.861	0	431.85	1	285.814	0	439.77	1	138.811	0	439.77	N	MFTCRVDHRGLTFQQNASSMCVPDQDTAIRV	X;X;X;X;X;X;X;X;X;X;X;X;X;X;X;Deamidation 18O (N);X;X;X;Oxidation (M);X;X;X;X;X;X;X;X;X;X;X
930	P01871	Immunoglobulin heavy constant mu (Ig mu chain C region) (Ig mu chain C region BOT) (Ig mu chain C region GAL) (Ig mu chain C region OU)	IGHM	P01871	0.999993	51.3677	3.49771e-101	275.67	228.48	275.67					0.986867	18.7591	0.0250446	90.108	0.5	0	0.0233809	84.615	0.998611	28.5675	3.32707e-05	157.38	0.5	0	0.0153962	100.09	0.999786	36.6875	0.000143995	146.11	0.999993	51.3677	3.49771e-101	275.67	0.99991	40.4489	6.44764e-35	233.09	0.999816	37.352	0.000166735	173.73	N	QDFLPDSITFSWKYKNNSDISSTRGFPSVLR	X;X;X;X;X;X;X;X;X;X;X;X;X;X;X;Deamidation 18O (N);X;X;X;X;X;X;X;X;X;X;X;X;X;X;X
931	P01871	Immunoglobulin heavy constant mu (Ig mu chain C region) (Ig mu chain C region BOT) (Ig mu chain C region GAL) (Ig mu chain C region OU)	IGHM	P01871	0.5	0	0.000201128	187.78	170.39	75.739									0.5	0	0.0233809	84.615	0.5	0	0.0018757	131.06	0.5	0	0.0153962	100.09	0.5	0	0.0039167	116.73	0.5	0	0.000201128	187.78	0.5	0	0.00251196	176.75	0.5	0	0.00310851	173.73	N	DFLPDSITFSWKYKNNSDISSTRGFPSVLRG	X;X;X;X;X;X;X;X;X;X;X;X;X;X;X;X;X;X;X;X;X;X;X;X;X;X;X;X;X;X;X
932	P01871	Immunoglobulin heavy constant mu (Ig mu chain C region) (Ig mu chain C region BOT) (Ig mu chain C region GAL) (Ig mu chain C region OU)	IGHM	P01871	1	213.523	2.46588e-214	305.75	294.65	213.52													1	305.75	2.46588e-214	305.75					1	186.676	2.33012e-41	186.68	1	238.884	8.51928e-89	238.88	1	213.523	3.32127e-57	213.52					N	TERTVDKSTGKPTLYNVSLVMSDTAGTCY__	X;X;X;X;X;X;X;X;X;X;X;X;X;X;X;Deamidation 18O (N);X;X;X;X;Oxidation (M);X;X;X;X;X;X;X;X;X;X
933	P01871	Immunoglobulin heavy constant mu (Ig mu chain C region) (Ig mu chain C region BOT) (Ig mu chain C region GAL) (Ig mu chain C region OU)	IGHM	P01871	1	158.237	1.18911e-58	167.07	163.09	167.07													1	158.237	1.18911e-58	167.07																					N	ISWTRQNGEAVKTHTNISESHPNATFSAVGE	X;X;X;X;X;X;X;X;X;X;X;X;X;X;X;Deamidation 18O (N);X;X;X;X;X;X;Deamidation 18O (N);X;X;X;X;X;X;X;X
934	P01871	Immunoglobulin heavy constant mu (Ig mu chain C region) (Ig mu chain C region BOT) (Ig mu chain C region GAL) (Ig mu chain C region OU)	IGHM	P01871	1	154.021	1.18911e-58	167.07	163.09	167.07													1	154.021	1.18911e-58	167.07																					N	GEAVKTHTNISESHPNATFSAVGEASICEDD	X;X;X;X;X;X;X;X;Deamidation 18O (N);X;X;X;X;X;X;Deamidation 18O (N);X;X;X;X;X;X;X;X;X;X;X;X;X;X;X
935	P02458	Collagen alpha-1(II) chain (Alpha-1 type II collagen) [Cleaved into: Collagen alpha-1(II) chain; Chondrocalcin]	COL2A1	P02458	1	148.721	6.39275e-47	228.12	192.57	148.72	1	64.6747	1.40825e-28	160.27	1	128.962	8.79447e-10	128.96	1	127.355	5.82408e-37	167.32	1	146.586	2.05514e-27	155.43	1	137.681	3.62242e-14	156.24	1	135.025	9.09075e-14	135.02	1	149.324	2.01193e-14	176.87	1	139.295	6.39275e-47	228.12	1	148.721	7.95985e-18	192.05	N	VQMTFLRLLSTEGSQNITYHCKNSIAYLDEA	X;X;X;X;X;X;X;X;X;X;X;X;X;X;X;Deamidation 18O (N);X;X;X;X;X;X;X;X;X;X;X;X;X;X;X
936	V9HWP0	Pentaxin (Pentraxin)	HEL-S-92n APCS hCG_39427	V9HWP0	1	178.068	8.74383e-90	226.56	214.93	226.56	1	159.956	6.12113e-57	190.88	1	178.068	8.74383e-90	226.56	1	149.281	5.52805e-51	172.49									1	122.818	4.30313e-30	143.31													N	TDHVNLITPLEKPLQNFTLCFRAYSDLSRAY	X;X;X;X;X;X;X;X;X;X;X;X;X;X;X;Deamidation 18O (N);X;X;X;X;X;X;X;X;X;X;X;X;X;X;X
937	V9HWF6	Alpha-1-acid glycoprotein	HEL-S-153w	V9HWF6	1	147.788	0	445.43	406.64	445.43	1	83.5928	0	329.73	1	90.9182	0	366.75	1	103.356	0	364.76	1	147.788	0	445.43	1	83.9978	0	359.83	1	105.575	0	381.41	1	89.014	0	362.46	1	86.1458	1.6598e-254	326.24	1	119.764	0	381.17	N	IFLREYQTRQDQCIYNTTYLNVQRENGTISR	X;X;X;X;X;X;X;X;X;X;X;X;X;X;X;Deamidation 18O (N);X;X;X;X;X;X;X;X;X;Deamidation 18O (N);X;X;X;X;X
938	P02790	Hemopexin (Beta-1B-glycoprotein)	HPX	P02790	1	212.815	5.83513e-61	212.82	178.01	212.82	1	161.19	2.88444e-14	161.19	1	117.251	6.18739e-05	117.25	1	64.9182	0.0248825	64.918	1	183.853	1.37282e-15	183.85	1	141.879	5.04894e-09	141.88	1	176.484	1.38968e-14	176.48	1	206.488	2.14827e-24	206.49	1	184.901	5.83513e-61	184.9	1	212.815	1.16304e-29	212.82	N	DVEKLNAAKALPQPQNVTSLLGCTH______	X;X;X;X;X;X;X;X;X;X;X;X;X;X;X;Deamidation 18O (N);X;X;X;X;X;X;X;X;X;X;X;X;X;X;X
939	P02790	Hemopexin (Beta-1B-glycoprotein)	HPX	P02790	1	192.65	1.60202e-44	192.65	186.07	192.65													1	192.65	1.60202e-44	192.65																					N	RCSDGWSFDATTLDDNGTMLFFKGEFVWKSH	X;X;X;X;X;X;X;X;X;X;X;X;X;X;X;Deamidation 18O (N);X;X;X;X;X;X;X;X;X;X;X;X;X;X;X
940	P03951	Coagulation factor XI (FXI) (EC 3.4.21.27) (Plasma thromboplastin antecedent) (PTA) [Cleaved into: Coagulation factor XIa heavy chain; Coagulation factor XIa light chain]	F11	P03951	0.999831	37.7272	0.00324003	111.39	92.135	111.39													0.999831	37.7272	0.00324003	111.39	0.988111	19.1965	0.0361733	70.256	0.996824	24.9671	0.0170311	83.948	0.996388	24.4062	0.0151491	86.744	0.996913	25.0916	0.0415128	71.425	0.997302	25.677	0.0119928	95.502	N	NKDIYVDLDMKGINYNSSVAKSAQECQERCT	X;X;X;X;X;X;X;X;X;X;X;X;X;X;X;Deamidation 18O (N);X;X;X;X;X;X;X;X;X;X;X;X;X;X;X
941	P03951	Coagulation factor XI (FXI) (EC 3.4.21.27) (Plasma thromboplastin antecedent) (PTA) [Cleaved into: Coagulation factor XIa heavy chain; Coagulation factor XIa light chain]	F11	P03951	1	119.377	5.48117e-46	211.7	176.5	119.38									1	68.5672	0.00186119	68.567	1	121.312	2.3943e-11	121.31					1	122.217	8.54616e-09	122.22					1	211.699	5.48117e-46	211.7	1	119.377	2.10241e-08	119.38	N	ESGYDIALLKLETTVNYTDSQRPICLPSKGD	X;X;X;X;X;X;X;X;X;X;X;X;X;X;X;Deamidation 18O (N);X;X;X;X;X;X;X;X;X;X;X;X;X;X;X
942	P03951	Coagulation factor XI (FXI) (EC 3.4.21.27) (Plasma thromboplastin antecedent) (PTA) [Cleaved into: Coagulation factor XIa heavy chain; Coagulation factor XIa light chain]	F11	P03951	1	196.07	2.28156e-67	196.07	153.04	196.07																					1	121.899	0.000492799	121.9	1	185.327	1.04115e-53	185.33	1	144.55	1.03039e-05	144.55	1	196.07	2.28156e-67	196.07	N	GVESPKILRVYSGILNQSEIKEDTSFFGVQE	X;X;X;X;X;X;X;X;X;X;X;X;X;X;X;Deamidation 18O (N);X;X;X;X;X;X;X;X;X;X;X;X;X;X;X
943	P04196	Histidine-rich glycoprotein (Histidine-proline-rich glycoprotein) (HPRG)	HRG	P04196	0.448948	0	0.000196216	112.15	102.5	107.74					0.333333	0	0.000196216	112.15					0.448948	0	0.00104321	107.74																					N	QHATFGTNGAQRHSHNNNSSDLHPHKHHSHE	X;X;X;X;X;X;X;X;X;X;X;X;X;X;X;Deamidation 18O (N);X;X;X;X;X;X;X;X;X;X;X;X;X;X;X
944	P04196	Histidine-rich glycoprotein (Histidine-proline-rich glycoprotein) (HPRG)	HRG	P04196	0.797993	6.50327	0.000196216	112.15	102.5	92.039					0.664128	5.97109	0.000196216	112.15					0.448948	0	0.00104321	107.74	0.797993	6.50327	0.00166401	92.039																	N	HATFGTNGAQRHSHNNNSSDLHPHKHHSHEQ	X;X;X;X;X;X;X;X;X;X;X;X;X;X;X;Deamidation 18O (N);X;X;X;X;X;X;X;X;X;X;X;X;X;X;X
945	P04196	Histidine-rich glycoprotein (Histidine-proline-rich glycoprotein) (HPRG)	HRG	P04196	0.916094	10.8144	3.19736e-13	192.54	162.48	192.54					0.333333	0	0.000196216	112.15					0.816742	7.53291	0.000311611	124.86	0.916094	10.8144	3.19736e-13	192.54																	N	ATFGTNGAQRHSHNNNSSDLHPHKHHSHEQH	X;X;X;X;X;X;X;X;X;X;X;X;X;X;X;Deamidation 18O (N);X;X;X;X;X;X;X;X;X;X;X;X;X;X;X
946	P04196	Histidine-rich glycoprotein (Histidine-proline-rich glycoprotein) (HPRG)	HRG	P04196	1	235.205	0	338.61	319.48	308.84	1	187.894	1.14302e-119	263.59	1	221.157	3.18344e-178	296.85	1	205.378	3.85293e-137	271.64	1	240.74	1.95189e-225	314.17	1	116.416	1.4724e-18	146.47	1	135.354	1.11082e-28	170.56	1	199.275	1.10626e-119	263.83	1	272.344	0	338.61	1	235.205	5.92518e-225	308.84	N	TRHSHESQDLRVIDFNCTTSSVSSALANTKD	X;X;X;X;X;X;X;X;X;X;X;X;X;X;X;Deamidation 18O (N);X;X;X;X;X;X;X;X;X;X;X;X;X;X;X
947	P05164	Myeloperoxidase (MPO) (EC 1.11.2.2) [Cleaved into: Myeloperoxidase; 89 kDa myeloperoxidase; 84 kDa myeloperoxidase; Myeloperoxidase light chain; Myeloperoxidase heavy chain]	MPO	P05164	1	69.6021	7.61198e-11	138.55	106.21	138.55	0.999968	44.9251	0.000685133	86.479	0.999409	32.2802	0.00807822	64.83																					1	69.6021	7.61198e-11	138.55	1	64.6741	6.47943e-07	118.24	N	LLPFDNLHDDPCLLTNRSARIPCFLAGDTRS	X;X;X;X;X;X;X;X;X;X;X;X;X;X;X;Deamidation 18O (N);X;X;X;X;X;X;X;X;X;X;X;X;X;X;X
948	P05164	Myeloperoxidase (MPO) (EC 1.11.2.2) [Cleaved into: Myeloperoxidase; 89 kDa myeloperoxidase; 84 kDa myeloperoxidase; Myeloperoxidase light chain; Myeloperoxidase heavy chain]	MPO	P05164	0.994714	22.7457	0.0101133	87.184	68.873	87.184													0.994714	22.7457	0.0101133	87.184																					N	SMVYGSEEPLARNLRNMSNQLGLLAVNQRFQ	X;X;X;X;X;X;X;X;X;X;X;X;X;X;X;Deamidation 18O (N);Oxidation (M);X;X;X;X;X;X;X;X;X;X;X;X;X;X
949	P05164	Myeloperoxidase (MPO) (EC 1.11.2.2) [Cleaved into: Myeloperoxidase; 89 kDa myeloperoxidase; 84 kDa myeloperoxidase; Myeloperoxidase light chain; Myeloperoxidase heavy chain]	MPO	P05164	1	127.514	7.11457e-09	164.65	140.62	127.51	1	88.5961	0.00645434	88.596	1	120.77	0.000542547	120.77	1	77.6404	0.0136162	77.64	1	152.538	7.11457e-09	152.54					1	164.652	1.46853e-08	164.65					1	149.231	8.38281e-09	149.23	1	127.514	0.000150265	127.51	N	DCIPFFRSCPACPGSNITIRNQINALTSFVD	X;X;X;X;X;X;X;X;X;X;X;X;X;X;X;Deamidation 18O (N);X;X;X;X;X;X;X;X;X;X;X;X;X;X;X
950	P05164	Myeloperoxidase (MPO) (EC 1.11.2.2) [Cleaved into: Myeloperoxidase; 89 kDa myeloperoxidase; 84 kDa myeloperoxidase; Myeloperoxidase light chain; Myeloperoxidase heavy chain]	MPO	P05164	1	100.017	0.00187024	131.44	119.08	100.02					1	131.439	0.00187024	131.44	1	93.6488	0.019175	93.649	1	100.017	0.0154458	100.02																					N	GPTAMRKYLPTYRSYNDSVDPRIANVFTNAF	X;X;X;X;X;X;X;X;X;X;X;X;X;X;X;Deamidation 18O (N);X;X;X;X;X;X;X;X;X;X;X;X;X;X;X
951	P05543	Thyroxine-binding globulin (Serpin A7) (T4-binding globulin)	SERPINA7 TBG	P05543	1	267.929	4.67264e-120	267.93	219.88	267.93													1	191.058	7.57792e-34	191.06													1	267.929	4.67264e-120	267.93					N	VKTLYETEVFSTDFSNISAAKQEINSHVEMQ	X;X;X;X;X;X;X;X;X;X;X;X;X;X;X;Deamidation 18O (N);X;X;X;X;X;X;X;X;X;X;X;X;X;X;X
952	P05543	Thyroxine-binding globulin (Serpin A7) (T4-binding globulin)	SERPINA7 TBG	P05543	1	46.6804	3.93024e-12	148.33	131.26	46.68													1	112.5	0.000295378	112.5													1	148.332	3.93024e-12	148.33	1	46.6804	0.0343474	46.68	N	ASPEGKVTACHSSQPNATLYKMSSINADFAF	X;X;X;X;X;X;X;X;X;X;X;X;X;X;X;Deamidation 18O (N);X;X;X;X;X;X;X;X;X;X;X;X;X;X;X
953	Q8IVC0	Serpin peptidase inhibitor, clade D (Heparin cofactor), member 1	SERPIND1	Q8IVC0	1	101.412	0.0166508	107.59	89.827	101.41	1	76.7741	0.0361758	76.774	1	104.747	0.0166508	104.75	1	107.594	0.0322458	107.59	1	101.412	0.0182968	101.41																					N	THEQVHSILHFKDFVNASSKYEITTIHNLFR	X;X;X;X;X;X;X;X;X;X;X;X;X;X;X;Deamidation 18O (N);X;X;X;X;X;X;X;X;X;X;X;X;X;X;X
954	P05556	Integrin beta-1 (Fibronectin receptor subunit beta) (Glycoprotein IIa) (GPIIA) (VLA-4 subunit beta) (CD antigen CD29)	ITGB1 FNRB MDF2 MSK12	P05556	1	62.0349	4.36535e-17	147.26	139.67	62.035													1	84.4684	0.00216845	84.468	1	81.9037	0.0081803	81.904	1	96.4641	0.0016493	96.464	1	147.262	4.36535e-17	147.26	1	75.9113	0.00576741	75.911	1	62.0349	0.0155718	62.035	N	CQSEGIPESPKCHEGNGTFECGACRCNEGRV	X;X;X;X;X;X;X;X;X;X;X;X;X;X;X;Deamidation 18O (N);X;X;X;X;X;X;X;X;X;X;X;X;X;X;X
955	P05556	Integrin beta-1 (Fibronectin receptor subunit beta) (Glycoprotein IIa) (GPIIA) (VLA-4 subunit beta) (CD antigen CD29)	ITGB1 FNRB MDF2 MSK12	P05556	1	79.0133	3.0774e-84	254.45	207.72	79.013									1	197.298	6.51407e-72	197.3	1	92.4392	1.81357e-10	185.25					1	66.2889	5.97647e-32	223.71					1	79.0133	3.0774e-84	254.45	1	215.077	3.11065e-24	215.08	N	KGEKKDTCTQECSYFNITKVESRDKLPQPVQ	X;X;X;X;X;X;X;X;X;X;X;X;X;X;X;Deamidation 18O (N);X;X;X;X;X;X;X;X;X;X;X;X;X;X;X
956	P05556	Integrin beta-1 (Fibronectin receptor subunit beta) (Glycoprotein IIa) (GPIIA) (VLA-4 subunit beta) (CD antigen CD29)	ITGB1 FNRB MDF2 MSK12	P05556	0.999993	51.4289	1.06002e-31	158.52	148.76	112.57													0.999957	43.9626	1.06002e-31	158.52					0.818825	9.56122	0.020143	55.588	0.999936	42.8841	6.10125e-21	124.69	0.999993	51.4289	1.28418e-13	112.57					N	DEVNSEDMDAYCRKENSSEICSNNGECVCGQ	X;X;X;X;X;X;X;X;X;X;X;X;X;X;X;Deamidation 18O (N);X;X;X;X;X;X;Deamidation 18O (N);Deamidation 18O (N);X;X;X;X;X;X;X
957	P05556	Integrin beta-1 (Fibronectin receptor subunit beta) (Glycoprotein IIa) (GPIIA) (VLA-4 subunit beta) (CD antigen CD29)	ITGB1 FNRB MDF2 MSK12	P05556	0.583358	1.44314	0.00450769	61.361	56.938	61.361																									0.583358	1.44314	0.00450769	61.361									N	MDAYCRKENSSEICSNNGECVCGQCVCRKRD	X;X;X;X;X;X;X;X;Deamidation 18O (N);X;X;X;X;X;X;Deamidation 18O (N);X;X;X;X;X;X;X;X;X;X;X;X;X;X;X
958	P05556	Integrin beta-1 (Fibronectin receptor subunit beta) (Glycoprotein IIa) (GPIIA) (VLA-4 subunit beta) (CD antigen CD29)	ITGB1 FNRB MDF2 MSK12	P05556	0.990725	20.2827	1.28418e-13	112.57	104.67	85.498																									0.990725	20.2827	1.06822e-06	85.498	0.94195	12.1023	1.28418e-13	112.57					N	DAYCRKENSSEICSNNGECVCGQCVCRKRDN	X;X;X;X;X;X;X;Deamidation 18O (N);X;X;X;X;X;X;X;Deamidation 18O (N);X;X;X;X;X;X;X;X;X;X;X;X;X;X;X
959	P05556	Integrin beta-1 (Fibronectin receptor subunit beta) (Glycoprotein IIa) (GPIIA) (VLA-4 subunit beta) (CD antigen CD29)	ITGB1 FNRB MDF2 MSK12	P05556	1	280.523	0	351.06	342.66	351.06					1	110.661	3.36575e-06	130.79	0.999992	50.888	0.0121664	70.628	1	280.523	0	351.06					1	147.935	1.54298e-105	212.59	1	112.855	8.71049e-37	162.48	1	159.877	1.41646e-143	232.83					N	STTPAKLRNPCTSEQNCTSPFSYKNVLSLTN	X;X;X;X;X;X;X;X;X;X;X;X;X;X;X;Deamidation 18O (N);X;X;X;X;X;X;X;X;X;X;X;X;X;X;X
960	P05556	Integrin beta-1 (Fibronectin receptor subunit beta) (Glycoprotein IIa) (GPIIA) (VLA-4 subunit beta) (CD antigen CD29)	ITGB1 FNRB MDF2 MSK12	P05556	0.998997	29.9834	4.31885e-08	99.34	93.498	99.34													0.998997	29.9834	4.31885e-08	99.34																					N	CGECIQAGPNCGWCTNSTFLQEGMPTSARCD	X;X;X;X;X;X;X;X;X;X;X;X;X;X;X;Deamidation 18O (N);X;X;X;X;X;X;X;X;X;X;X;X;X;X;X
961	P07357	Complement component C8 alpha chain (Complement component 8 subunit alpha)	C8A	P07357	1	267.286	3.96894e-159	267.29	224.2	267.29													1	249.834	1.6114e-65	249.83					1	68.1321	0.0226367	68.132	1	236.347	3.96894e-159	236.35	1	234.988	3.6791e-52	234.99	1	267.286	1.2161e-93	267.29	N	RVRGGSSGWSGGLAQNRSTITYRSWGRSLKY	X;X;X;X;X;X;X;X;X;X;X;X;X;X;X;Deamidation 18O (N);X;X;X;X;X;X;X;X;X;X;X;X;X;X;X
962	Q6FH10	Decorin (Bone proteoglycan II)	DCN DKFZp686J19238 hCG_24110	Q6FH10	1	57.5952	2.86302e-154	260.09	241.41	57.595	1	61.1654	1.89976e-130	260.09	1	40.0859	7.71824e-154	240.59	1	224.296	3.88474e-90	232.01	1	238.352	7.62019e-116	250.27					1	135.059	2.76305e-22	140.31	1	169.871	3.98081e-51	176.08	1	74.6429	3.6293e-102	235.53	1	57.5952	2.86302e-154	243.09	N	FQGMKKLSYIRIADTNITSIPQGLPPSLTEL	X;X;X;X;X;X;X;X;X;X;X;X;X;X;X;Deamidation 18O (N);X;X;X;X;X;X;X;X;X;X;X;X;X;X;X
963	Q6FH10	Decorin (Bone proteoglycan II)	DCN DKFZp686J19238 hCG_24110	Q6FH10	1	57.5952	0.000336377	74.643	57.704	57.595	1	61.1654	0.00470785	61.165	1	40.0859	0.0141355	43.156																					1	74.6429	0.000336377	74.643	1	57.5952	0.0142679	57.595	N	PQGLPPSLTELHLDGNKISRVDAASLKGLNN	X;X;X;X;X;X;X;X;X;X;X;X;X;X;X;Deamidation 18O (N);X;X;X;X;X;X;X;X;X;X;X;X;X;X;X
964	Q6FH10	Decorin (Bone proteoglycan II)	DCN DKFZp686J19238 hCG_24110	Q6FH10	1	99.2164	4.22459e-46	158.93	128.49	158.93	0.999969	45.0194	0.00169976	71.756	0.996687	24.6888	0.0339283	40.402	1	73.8637	1.92473e-12	103.31	0.999833	37.6266	0.0425926	40.669	1	96.4219	9.17675e-16	120.3					1	96.2872	2.28387e-22	132.6	1	99.2164	4.22459e-46	158.93	1	98.2384	3.05539e-18	118.44	N	SLKGLNNLAKLGLSFNSISAVDNGSLANTPH	X;X;X;X;X;X;X;X;X;X;X;X;X;X;X;Deamidation 18O (N);X;X;X;X;X;X;Deamidation 18O (N);X;X;X;X;X;X;X;X
965	Q6FH10	Decorin (Bone proteoglycan II)	DCN DKFZp686J19238 hCG_24110	Q6FH10	1	146.149	0	398.14	398.14	351.15	1	67.0024	0	398.14	1	74.7968	0	337.87	1	75.2405	3.14607e-294	329.5	1	124.129	0	355.19	1	82.1568	9.26388e-267	325.1	1	123.684	0	348.48	1	124.043	0	376.45	1	98.5005	0	383.41	1	146.149	0	351.15	N	LAKLGLSFNSISAVDNGSLANTPHLRELHLD	X;X;X;X;X;X;X;X;Deamidation 18O (N);X;X;X;X;X;X;Deamidation 18O (N);X;X;X;X;X;X;X;X;X;X;X;X;X;X;X
966	Q6FH10	Decorin (Bone proteoglycan II)	DCN DKFZp686J19238 hCG_24110	Q6FH10	0.930132	10.9328	2.57964e-91	230.88	222.71	61.526	0.788945	5.36559	2.57964e-91	230.88	0.822152	5.48343	1.29338e-67	171.98	0.534623	1.10401	5.8419e-71	209.68	0.71587	3.34481	5.08728e-06	99.536	0.816865	5.3951	2.76137e-30	134.2	0.793566	5.71807	6.9982e-59	196.41	0.930132	10.9328	4.97785e-37	140.42	0.853383	6.93161	1.90794e-80	222.46	0.853806	6.65751	5.10577e-72	215.34	N	GGLAEHKYIQVVYLHNNNISVVGSSDFCPPG	X;X;X;X;X;X;X;X;X;X;X;X;X;X;X;Deamidation 18O (N);Deamidation 18O (N);Deamidation 18O (N);X;X;X;X;X;X;X;X;X;X;X;X;X
967	Q6FH10	Decorin (Bone proteoglycan II)	DCN DKFZp686J19238 hCG_24110	Q6FH10	0.937612	10.773	1.83539e-143	228.19	219.89	81.345	0.925014	9.92501	1.71893e-24	121.72	0.852652	7.15933	2.12706e-05	83.788	0.507847	0.976143	5.03029e-81	171.08	0.71587	3.34481	4.37855e-95	183.63	0.816865	5.3951	1.83539e-143	228.19	0.771014	5.19494	3.48054e-05	78.991	0.930132	10.9328	2.15209e-16	130.78	0.937612	10.773	9.69041e-82	224.93	0.92177	9.57693	3.73631e-81	173.11	N	GLAEHKYIQVVYLHNNNISVVGSSDFCPPGH	X;X;X;X;X;X;X;X;X;X;X;X;X;X;Deamidation 18O (N);Deamidation 18O (N);Deamidation 18O (N);X;X;X;X;X;X;X;X;X;X;X;X;X;X
968	Q6FH10	Decorin (Bone proteoglycan II)	DCN DKFZp686J19238 hCG_24110	Q6FH10	0.999179	30.485	0	361.46	327.63	154.12	0.984782	18.5402	2.10585e-161	216.96	0.981294	17.6842	1.41743e-63	198.99	0.918065	13.5043	9.26564e-117	246.2	0.979532	17.2713	1.38665e-239	277.8	0.815833	5.35688	1.4296e-67	162.44	0.633257	0.364833	3.48054e-05	78.991	0.994171	23.0202	2.54155e-116	244.89	0.999179	30.485	0	361.46	0.99001	19.1535	1.52178e-54	184.95	N	LAEHKYIQVVYLHNNNISVVGSSDFCPPGHN	X;X;X;X;X;X;X;X;X;X;X;X;X;Deamidation 18O (N);Deamidation 18O (N);Deamidation 18O (N);X;X;X;X;X;X;X;X;X;X;X;X;X;X;Deamidation 18O (N)
969	Q6FH10	Decorin (Bone proteoglycan II)	DCN DKFZp686J19238 hCG_24110	Q6FH10	0.994942	23.8117	2.14406e-12	92.211	75.854	81.428	0.902995	8.83427	0.00144189	50.189	0.980609	15.2069	0.0362491	47.548	0.972065	13.6412	0.0180234	52.254	0.983922	16.9561	0.00138296	55.994					0.950742	12.8559	0.00319797	50.498	0.994942	23.8117	4.17707e-08	81.428					0.879144	9.50218	2.14406e-12	92.211	N	NISVVGSSDFCPPGHNTKKASYSGVSLFSNP	Deamidation 18O (N);X;X;X;X;X;X;X;X;X;X;X;X;X;X;Deamidation 18O (N);X;X;X;X;X;X;X;X;X;X;X;X;X;Deamidation 18O (N);X
970	P08254	Stromelysin-1 (SL-1) (EC 3.4.24.17) (Matrix metalloproteinase-3) (MMP-3) (Transin-1)	MMP3 STMY1	P08254	1	82.7494	0.0107751	98.048	59.257	82.749																													1	98.0483	0.0107751	98.048	1	82.7494	0.0178376	82.749	N	GIPKWRKTHLTYRIVNYTPDLPKDAVDSAVE	X;X;X;X;X;X;X;X;X;X;X;X;X;X;X;Deamidation 18O (N);X;X;X;X;X;X;X;X;X;X;X;X;X;X;X
971	X6R5C5	Carboxypeptidase (EC 3.4.16.-)	CTSA	X6R5C5	1	77.4653	7.35748e-15	138.5	118.93	138.5													1	77.4653	7.35748e-15	138.5																					N	LLRSGDKVRMDPPCTNTTAASTYLNNPYVRK	X;X;X;X;X;X;X;X;X;X;X;X;X;X;X;Deamidation 18O (N);X;X;X;X;X;X;X;X;X;X;X;X;X;X;X
972	Q59EZ3	Insulin-like growth factor 2 receptor variant (Fragment)		Q59EZ3	0.996539	24.593	2.81949e-25	157.75	147.4	157.75													0.996539	24.593	2.81949e-25	157.75																					N	DRDAGVGFPEYQEEDNSTYNFRWYTSYACPE	X;X;X;X;X;X;X;X;X;X;X;X;X;X;X;Deamidation 18O (N);X;X;X;X;X;X;X;X;X;X;X;X;X;X;X
973	Q59EZ3	Insulin-like growth factor 2 receptor variant (Fragment)		Q59EZ3	1	44.5638	0.00135065	114.4	107.51	44.564													1	78.6526	0.00135065	114.4													1	44.5638	0.0410793	44.564					N	LLTQKLTYENGLLKMNFTGGDTCHKVYQRST	X;X;X;X;X;X;X;X;X;X;X;X;X;X;X;Deamidation 18O (N);X;X;X;X;X;X;X;X;X;X;X;X;X;X;X
974	Q59EZ3	Insulin-like growth factor 2 receptor variant (Fragment)		Q59EZ3	0.999958	43.7953	0.00105032	138.1	126.61	138.1																													0.999958	43.7953	0.00105032	138.1					N	CSSGFQRMSVINFECNKTAGNDGKGTPVFTG	X;X;X;X;X;X;X;X;X;X;X;X;X;X;X;Deamidation 18O (N);X;X;X;X;X;X;X;X;X;X;X;X;X;X;X
975	Q59EZ3	Insulin-like growth factor 2 receptor variant (Fragment)		Q59EZ3	0.999997	55.5874	0.000149505	103.9	88.812	103.9													0.999997	55.5874	0.000149505	103.9																					N	GDSVLRSATRSLLEFNTTVSCDQQGTNHRVQ	X;X;X;X;X;X;X;X;X;X;X;X;X;X;X;Deamidation 18O (N);X;X;X;X;X;X;X;X;X;X;X;X;X;X;X
976	Q59EZ3	Insulin-like growth factor 2 receptor variant (Fragment)		Q59EZ3	1	175.211	2.31405e-29	175.21	161.98	175.21																									1	86.9598	0.00075486	86.96	1	175.211	2.31405e-29	175.21					N	YSDGDDCGHGKKIKTNITLVCKPGDLESAPV	X;X;X;X;X;X;X;X;X;X;X;X;X;X;X;Deamidation 18O (N);X;X;X;X;X;X;X;X;X;X;X;X;X;X;X
977	P12273	Prolactin-inducible protein (Gross cystic disease fluid protein 15) (GCDFP-15) (Prolactin-induced protein) (Secretory actin-binding protein) (SABP) (gp17)	PIP GCDFP15 GPIP4	P12273	1	123.208	8.19658e-23	160.56	141.29	123.21																									1	160.561	8.19658e-23	160.56					1	123.208	0.000264779	123.21	N	LCDDNPKTFYWDFYTNRTVQIAAVVDVIREL	X;X;X;X;X;X;X;X;X;X;X;X;X;X;X;Deamidation 18O (N);X;X;X;X;X;X;X;X;X;X;X;X;X;X;X
978	P13473	Lysosome-associated membrane glycoprotein 2 (LAMP-2) (Lysosome-associated membrane protein 2) (CD107 antigen-like family member B) (LGP-96) (CD antigen CD107b)	LAMP2	P13473	1	116.8	1.74016e-43	147.67	130.41	147.67													1	116.8	1.74016e-43	147.67													0.997759	26.4859	0.019063	50.966					N	TYKTVTISDHGTVTYNGSICGDDQNGPKIAV	X;X;X;X;X;X;X;X;X;X;X;X;X;X;X;Deamidation 18O (N);X;X;X;X;X;X;X;X;X;X;X;X;X;X;X
979	P13473	Lysosome-associated membrane glycoprotein 2 (LAMP-2) (Lysosome-associated membrane protein 2) (CD107 antigen-like family member B) (LGP-96) (CD antigen CD107b)	LAMP2	P13473	0.999908	40.3584	4.73954e-65	225.69	175.64	225.69	0.997769	26.5178	1.90033e-30	146.76					0.997575	26.2591	2.81598e-30	144.5	0.999908	40.3584	4.73954e-65	225.69	0.998003	27.0054	4.43942e-49	163.35	0.999143	30.6819	6.06494e-29	167.82	0.999836	37.8413	1.01277e-30	180.14	0.999823	37.513	4.24049e-29	171.72	0.999037	30.1633	2.62736e-19	149.57	N	NITQDKVASVININPNTTHSTGSCRSHTALL	X;X;X;X;X;X;X;X;X;X;X;X;X;X;X;Deamidation 18O (N);X;X;X;X;X;X;X;X;X;X;X;X;X;X;X
980	P13473	Lysosome-associated membrane glycoprotein 2 (LAMP-2) (Lysosome-associated membrane protein 2) (CD107 antigen-like family member B) (LGP-96) (CD antigen CD107b)	LAMP2	P13473	1	133.582	1.8674e-08	133.58	75.388	133.58					1	66.2702	0.0433185	66.27	1	66.2702	0.0433185	66.27					1	66.2702	0.0433185	66.27	1	65.2244	0.0451449	65.224	1	100.017	0.00960319	100.02	1	123.983	0.00029643	123.98	1	133.582	1.8674e-08	133.58	N	GAFQINTFDLRVQPFNVTQGKYSTAQDCSAD	X;X;X;X;X;X;X;X;X;X;X;X;X;X;X;Deamidation 18O (N);X;X;X;X;X;X;X;X;X;X;X;X;X;X;X
981	P13473	Lysosome-associated membrane glycoprotein 2 (LAMP-2) (Lysosome-associated membrane protein 2) (CD107 antigen-like family member B) (LGP-96) (CD antigen CD107b)	LAMP2	P13473	1	133.791	0.00356366	133.79	115.06	133.79													1	131.268	0.00391486	131.27					1	73.2482	0.0424567	73.248	1	121.989	0.00587759	121.99	1	133.791	0.00356366	133.79					N	TDSENATCLYAKWQMNFTVRYETTNKTYKTV	X;X;X;X;X;X;X;X;X;X;X;X;X;X;X;Deamidation 18O (N);X;X;X;X;X;X;X;X;X;X;X;X;X;X;X
982	P13535	Myosin-8 (Myosin heavy chain 8) (Myosin heavy chain, skeletal muscle, perinatal) (MyHC-perinatal)	MYH8	P13535	1	64.6536	0.0167914	71.349	11.923	64.654	1	71.3491	0.0167914	71.349	1	62.8229	0.037773	62.823					1	64.6536	0.0325537	64.654																					N	LAQRLQEAEEHVEAVNAKCASLEKTKQRLQN	X;X;X;X;X;X;X;X;X;X;X;X;X;X;X;Deamidation 18O (N);X;X;X;X;X;X;X;X;X;X;X;X;X;X;X
983	Q5VSQ6	Procollagen-proline, 2-oxoglutarate 4-dioxygenase (Proline 4-hydroxylase), alpha polypeptide I variant (Procollagen-proline, 2-oxoglutarate 4-dioxygenase (Proline 4-hydroxylase), alpha polypeptide I, isoform CRA_a) (Procollagen-proline, 2-oxoglutarate 4-dioxygenase (Proline 4-hydroxylase), alpha polypeptide I, isoform CRA_b) (Fragment)	P4HA1 hCG_19276	Q5VSQ6	1	145.405	1.26985e-17	204.69	187.25	145.41	1	77.6744	0.0093036	77.674	1	95.0183	0.00246874	95.018	1	131.369	1.17028e-07	131.37	1	74.6109	1.26985e-17	204.69									1	169.822	4.89873e-09	169.82	1	145.405	3.30871e-14	169.65	1	99.5386	0.00394289	99.539	N	LENLVLKDMSDGFISNLTIQRQYFPNDEDQV	X;X;X;X;X;X;X;X;Oxidation (M);X;X;X;X;X;X;Deamidation 18O (N);X;X;X;X;X;X;X;X;X;X;X;X;X;X;X
984	P14415	Sodium/potassium-transporting ATPase subunit beta-2 (Adhesion molecule in glia) (AMOG) (Sodium/potassium-dependent ATPase subunit beta-2)	ATP1B2	P14415	1	131.284	5.64067e-16	147.95	118.47	131.28																									1	147.947	5.64067e-16	147.95	1	117.673	0.000354763	117.67	1	131.284	5.43177e-05	131.28	N	WDQHVQKLNKFLEPYNDSIQAQKNDVCRPGR	X;X;X;X;X;X;X;X;X;X;X;X;X;X;X;Deamidation 18O (N);X;X;X;X;X;X;X;X;X;X;X;X;X;X;X
985	P14415	Sodium/potassium-transporting ATPase subunit beta-2 (Adhesion molecule in glia) (AMOG) (Sodium/potassium-dependent ATPase subunit beta-2)	ATP1B2	P14415	1	93.0847	9.20344e-21	151.26	118.76	151.26													1	65.8288	0.000133793	120.53	0.99998	46.9712	0.000929447	102.4					1	93.0847	9.20344e-21	151.26	1	73.4006	1.32526e-05	130.56	1	74.2907	1.73062e-13	136.7	N	FHVNYTQPLVAVKFLNVTPNVEVNVECRINA	X;X;X;X;X;X;X;X;X;X;X;X;X;X;X;Deamidation 18O (N);X;X;X;X;X;X;X;X;X;X;X;X;X;X;X
986	Q59FC6	Tumor rejection antigen (Gp96) 1 variant (Fragment)		Q59FC6	1	47.2368	5.60209e-157	291.57	269.34	47.237	1	147.262	3.19227e-12	147.26	1	282.916	1.73857e-136	282.92	1	132.79	1.69448e-14	152.4	1	150.683	7.30466e-13	150.68									1	277.065	3.35737e-118	277.06	1	112.023	5.60209e-157	291.57	1	47.2368	1.59856e-136	283.43	N	EVVQREEEAIQLDGLNASQIRELREKSEKFA	X;X;X;X;X;X;X;X;X;X;X;X;X;X;X;Deamidation 18O (N);X;X;X;X;X;X;X;X;X;X;X;X;X;X;X
987	Q59FC6	Tumor rejection antigen (Gp96) 1 variant (Fragment)		Q59FC6	0.56743	1.17857	2.45944e-41	181.67	166.17	126.55									0.548556	0.846179	2.45944e-41	181.67	0.527998	0.490465	0.0150093	51.029													0.56743	1.17857	3.4838e-13	126.55					N	SAFLVADKVIVTSKHNNDTQHIWESDSNEFS	X;X;X;X;X;X;X;X;X;X;X;X;X;X;X;Deamidation 18O (N);X;X;X;X;X;X;X;X;X;X;X;X;X;X;X
988	Q59FC6	Tumor rejection antigen (Gp96) 1 variant (Fragment)		Q59FC6	0.972258	15.4464	6.16129e-239	311.92	274.13	311.92					0.912283	10.1705	1.1837e-45	196.19					0.880633	8.6791	2.79166e-102	244.78									0.908713	9.9802	3.7778e-119	261.74	0.972258	15.4464	6.16129e-239	311.92	0.890271	9.09201	2.99166e-50	199.46	N	AFLVADKVIVTSKHNNDTQHIWESDSNEFSV	X;X;X;X;X;X;X;X;X;X;X;X;X;X;X;Deamidation 18O (N);X;X;X;X;X;X;X;X;X;X;X;X;X;X;X
989	P19652	Alpha-1-acid glycoprotein 2 (AGP 2) (Orosomucoid-2) (OMD 2)	ORM2 AGP2	P19652	1	102.737	0.0012493	116.55	93.968	116.55													1	102.737	0.0012493	116.55																					N	KTEDTIFLREYQTRQNQCFYNSSYLNVQREN	X;X;X;X;X;X;X;X;X;X;X;X;X;X;X;Deamidation 18O (N);X;X;X;X;Deamidation 18O (N);X;X;X;X;X;X;X;X;X;X
990	P19652	Alpha-1-acid glycoprotein 2 (AGP 2) (Orosomucoid-2) (OMD 2)	ORM2 AGP2	P19652	1	110.703	1.57658e-254	326.69	299.12	315.2					1	107.655	1.57658e-254	326.69	0.999999	62.8766	3.54273e-117	271.48	1	82.4601	1.60416e-178	300.95	1	78.5687	2.7677e-100	263.86	1	76.3068	1.99172e-202	312.65	1	77.929	2.89797e-202	310.77	1	90.6744	4.54063e-179	305.74	1	110.703	7.66757e-203	315.2	N	IFLREYQTRQNQCFYNSSYLNVQRENGTVSR	X;X;X;X;X;X;X;X;X;X;Deamidation 18O (N);X;X;X;X;Deamidation 18O (N);X;X;X;X;X;X;X;X;X;X;X;X;X;X;X
991	P22792	Carboxypeptidase N subunit 2 (Carboxypeptidase N 83 kDa chain) (Carboxypeptidase N large subunit) (Carboxypeptidase N polypeptide 2) (Carboxypeptidase N regulatory subunit)	CPN2 ACBP	P22792	0.688756	3.44963	0.0012871	99.407	80.869	99.407													0.688756	3.44963	0.0012871	99.407																					N	FRDLEELVKLYLGSNNLTALHPALFQNLSKL	X;X;X;X;X;X;X;X;X;X;X;X;X;X;X;Deamidation 18O (N);X;X;X;X;X;X;X;X;X;X;Deamidation 18O (N);X;X;X;X
992	P22792	Carboxypeptidase N subunit 2 (Carboxypeptidase N 83 kDa chain) (Carboxypeptidase N large subunit) (Carboxypeptidase N polypeptide 2) (Carboxypeptidase N regulatory subunit)	CPN2 ACBP	P22792	0.999999	56.6953	0.0012871	99.407	80.869	99.407													0.999999	56.6953	0.0012871	99.407																					N	LGSNNLTALHPALFQNLSKLELLSLSKNQLT	X;X;X;X;Deamidation 18O (N);X;X;X;X;X;X;X;X;X;X;Deamidation 18O (N);X;X;X;X;X;X;X;X;X;X;X;X;X;X;X
993	P23142	Fibulin-1 (FIBL-1)	FBLN1 PP213	P23142	1	232.149	2.06924e-109	265.12	240.78	232.15	1	123.139	2.58973e-67	237.46	1	241.788	7.05987e-68	241.79	1	226.999	2.88724e-55	227	1	218.431	6.43756e-46	223.97	1	89.2316	1.22616e-06	119.4	1	116.827	2.06924e-109	262.5	1	227.404	4.57769e-100	245.97	1	218.663	3.48675e-67	235.4	1	232.149	3.24105e-109	265.12	N	SLANEQDRCATPHGDNASLEATFVKRCCHCC	X;X;X;X;X;X;X;X;X;X;X;X;X;X;X;Deamidation 18O (N);X;X;X;X;X;X;X;X;X;X;X;X;X;X;X
994	P23142	Fibulin-1 (FIBL-1)	FBLN1 PP213	P23142	1	70.0483	2.57713e-67	184.88	183.02	184.88					1	70.0483	2.57713e-67	184.88																													N	GRNCQDIDECVTGIHNCSINETCFNIQGGFR	X;X;X;X;X;X;X;X;X;X;X;X;X;X;X;Deamidation 18O (N);X;X;X;Deamidation 18O (N);X;X;X;X;X;X;X;X;X;X;X
995	P23142	Fibulin-1 (FIBL-1)	FBLN1 PP213	P23142	0.999976	46.1699	2.57713e-67	184.88	183.02	184.88					0.999976	46.1699	2.57713e-67	184.88																													N	QDIDECVTGIHNCSINETCFNIQGGFRCLAF	X;X;X;X;X;X;X;X;X;X;X;Deamidation 18O (N);X;X;X;Deamidation 18O (N);X;X;X;X;X;X;X;X;X;X;X;X;X;X;X
996	V9HWC6	Peptidyl-prolyl cis-trans isomerase (PPIase) (EC 5.2.1.8)	HEL-S-39	V9HWC6	1	244.003	1.45613e-127	285.13	245.13	244	1	224.658	8.0304e-32	224.66	1	224.658	8.0304e-32	224.66	1	71.0845	1.45613e-127	285.13													1	205.07	4.07005e-17	205.07					1	244.003	2.25711e-64	244	N	YGPGWVSMANAGKDTNGSQFFITTVKTAWLD	X;X;X;X;X;X;X;X;X;X;X;X;X;X;X;Deamidation 18O (N);X;X;X;X;X;X;X;X;X;X;X;X;X;X;X
997	P24821	Tenascin (TN) (Cytotactin) (GMEM) (GP 150-225) (Glioma-associated-extracellular matrix antigen) (Hexabrachion) (JI) (Myotendinous antigen) (Neuronectin) (Tenascin-C) (TN-C)	TNC HXB	P24821	1	291.064	6.69451e-191	291.06	262.77	291.06													1	103.022	6.80821e-89	237.46									1	263.043	2.95724e-132	263.04	1	291.064	6.69451e-191	291.06					N	PARVKASTEQAPELENLTVTEVGWDGLRLNW	X;X;X;X;X;X;X;X;X;X;X;X;X;X;X;Deamidation 18O (N);X;X;X;X;X;X;X;X;X;X;X;X;X;Deamidation 18O (N);X
998	P24821	Tenascin (TN) (Cytotactin) (GMEM) (GP 150-225) (Glioma-associated-extracellular matrix antigen) (Hexabrachion) (JI) (Myotendinous antigen) (Neuronectin) (Tenascin-C) (TN-C)	TNC HXB	P24821	1	141.781	7.95542e-68	185.02	183.3	141.78													1	91.6597	5.74438e-08	91.66													1	141.781	7.95542e-68	185.02					N	ELICPNDCFDRGRCINGTCYCEEGFTGEDCG	X;X;X;X;X;X;X;X;X;X;X;X;X;X;X;Deamidation 18O (N);X;X;X;X;X;X;X;X;X;X;X;X;X;X;X
999	P24821	Tenascin (TN) (Cytotactin) (GMEM) (GP 150-225) (Glioma-associated-extracellular matrix antigen) (Hexabrachion) (JI) (Myotendinous antigen) (Neuronectin) (Tenascin-C) (TN-C)	TNC HXB	P24821	1	211.404	6.0876e-101	211.4	203.37	211.4					1	183.933	6.909e-83	183.93					1	181.876	1.01119e-82	181.88									1	196.007	1.34631e-87	196.01	1	193.29	3.72763e-87	193.29	1	211.404	6.0876e-101	211.4	N	SFTTALDGPSGLVTANITDSEALARWQPAIA	X;X;X;X;X;X;X;X;X;X;X;X;X;X;X;Deamidation 18O (N);X;X;X;X;X;X;X;X;X;X;X;X;X;X;X
1000	P24821	Tenascin (TN) (Cytotactin) (GMEM) (GP 150-225) (Glioma-associated-extracellular matrix antigen) (Hexabrachion) (JI) (Myotendinous antigen) (Neuronectin) (Tenascin-C) (TN-C)	TNC HXB	P24821	1	68.0334	0	345.38	335.54	68.033	1	244	6.69776e-80	244	1	250.52	1.61015e-80	250.52					1	77.5268	0	345.38	1	266.353	2.5549e-109	266.35	1	91.9142	0.000126227	95.508	1	124.068	2.64153e-166	293.25	1	78.763	6.24716e-80	244.58	1	68.0334	3.07121e-30	204.35	N	ATGRLDTRPFCSGRGNFSTEGCGCVCEPGWK	X;X;X;X;X;X;X;X;X;X;X;X;X;X;X;Deamidation 18O (N);X;X;X;X;X;X;X;X;X;X;X;X;X;X;X
1001	P24821	Tenascin (TN) (Cytotactin) (GMEM) (GP 150-225) (Glioma-associated-extracellular matrix antigen) (Hexabrachion) (JI) (Myotendinous antigen) (Neuronectin) (Tenascin-C) (TN-C)	TNC HXB	P24821	1	192.564	2.93125e-228	320.07	287.74	220.21	1	142.557	1.4182e-14	163.8	1	213.323	2.0626e-72	245.48	1	105.149	1.63574e-05	120.66	1	176.51	1.07139e-136	280.36	1	208.597	2.93125e-228	320.07	1	82.0573	0.000959469	98.943	1	241.676	3.68094e-179	301.93	1	176.113	2.23975e-23	201.3	1	192.564	4.82926e-38	220.21	N	TEGCGCVCEPGWKGPNCSEPECPGNCHLRGR	X;X;X;X;X;X;X;X;X;X;X;X;X;X;X;Deamidation 18O (N);X;X;X;X;X;X;X;X;X;X;X;X;X;X;X
1002	P24821	Tenascin (TN) (Cytotactin) (GMEM) (GP 150-225) (Glioma-associated-extracellular matrix antigen) (Hexabrachion) (JI) (Myotendinous antigen) (Neuronectin) (Tenascin-C) (TN-C)	TNC HXB	P24821	1	102.727	0	395.9	332.58	102.73					1	168.016	3.94561e-09	168.02					1	362.644	0	362.64	1	119.028	4.87372e-05	119.03	1	118.278	4.13042e-09	168.94	1	106.323	2.0841e-09	147.91	1	395.905	0	395.9	1	102.727	2.21668e-10	184.55	N	IEIIDSNRLLETVEYNISGAERTAHISGLPP	X;X;X;X;X;X;X;X;X;X;X;X;X;X;X;Deamidation 18O (N);X;X;X;X;X;X;X;X;X;X;X;X;X;X;X
1003	P24821	Tenascin (TN) (Cytotactin) (GMEM) (GP 150-225) (Glioma-associated-extracellular matrix antigen) (Hexabrachion) (JI) (Myotendinous antigen) (Neuronectin) (Tenascin-C) (TN-C)	TNC HXB	P24821	1	135.216	6.18093e-66	221.13	15.979	186.86													1	103.477	9.87514e-66	219.01	1	64.9547	3.2147e-08	116.94	1	85.8967	1.64704e-31	155.44	0.991181	20.5072	0.00343781	72.99	1	103.933	6.41614e-66	221.13	1	135.216	6.18093e-66	216.44	N	GDLAVSEVGWDGLRLNWTAADNAYEHFVIQV	X;X;X;X;X;X;X;X;X;X;X;X;X;X;X;Deamidation 18O (N);X;X;X;X;X;Deamidation 18O (N);X;X;X;X;X;X;X;X;X
1004	P24821	Tenascin (TN) (Cytotactin) (GMEM) (GP 150-225) (Glioma-associated-extracellular matrix antigen) (Hexabrachion) (JI) (Myotendinous antigen) (Neuronectin) (Tenascin-C) (TN-C)	TNC HXB	P24821	1	66.044	0.000162996	76.733	63.545	76.733																													1	66.044	0.000162996	76.733					N	EVGWDGLRLNWTAADNAYEHFVIQVQEVNKV	X;X;X;X;X;X;X;X;X;Deamidation 18O (N);X;X;X;X;X;Deamidation 18O (N);X;X;X;X;X;X;X;X;X;X;X;X;X;X;X
1005	P24821	Tenascin (TN) (Cytotactin) (GMEM) (GP 150-225) (Glioma-associated-extracellular matrix antigen) (Hexabrachion) (JI) (Myotendinous antigen) (Neuronectin) (Tenascin-C) (TN-C)	TNC HXB	P24821	1	223.98	9.41944e-170	286.68	197.2	227.19													1	195.702	6.33801e-150	275.04	1	194.2	1.44995e-96	214.35	1	180.121	3.75767e-89	238.87	1	183.525	9.13114e-42	186.86	1	93.4426	1.60505e-10	94.449	1	223.98	9.41944e-170	286.68	N	ENLTVTEVGWDGLRLNWTAADQAYEHFIIQV	X;Deamidation 18O (N);X;X;X;X;X;X;X;X;X;X;X;X;X;Deamidation 18O (N);X;X;X;X;X;X;X;X;X;X;X;X;X;X;X
1006	P24821	Tenascin (TN) (Cytotactin) (GMEM) (GP 150-225) (Glioma-associated-extracellular matrix antigen) (Hexabrachion) (JI) (Myotendinous antigen) (Neuronectin) (Tenascin-C) (TN-C)	TNC HXB	P24821	1	171.033	2.54902e-77	173.2	164.79	171.03													1	173.199	2.54902e-77	173.2													1	171.033	3.4695e-77	171.03					N	GNLTVTEVSWDALRLNWTTPDGTYDQFTIQV	X;X;X;X;X;X;X;X;X;X;X;X;X;X;X;Deamidation 18O (N);X;X;X;X;X;X;X;X;X;X;X;X;X;X;X
1007	P24821	Tenascin (TN) (Cytotactin) (GMEM) (GP 150-225) (Glioma-associated-extracellular matrix antigen) (Hexabrachion) (JI) (Myotendinous antigen) (Neuronectin) (Tenascin-C) (TN-C)	TNC HXB	P24821	1	171.033	2.54902e-77	173.2	164.79	171.03													1	173.199	2.54902e-77	173.2													1	171.033	3.4695e-77	171.03					N	FTIQVQEADQVEEAHNLTVPGSLRSMEIPGL	X;X;X;X;X;X;X;X;X;X;X;X;X;X;X;Deamidation 18O (N);X;X;X;X;X;X;X;X;X;X;X;X;X;X;X
1008	P24821	Tenascin (TN) (Cytotactin) (GMEM) (GP 150-225) (Glioma-associated-extracellular matrix antigen) (Hexabrachion) (JI) (Myotendinous antigen) (Neuronectin) (Tenascin-C) (TN-C)	TNC HXB	P24821	1	158.011	2.56179e-145	281.32	245.83	158.01	1	172.755	1.91281e-20	172.76	1	243.403	7.09244e-70	243.4	1	153.753	5.66602e-20	153.75	1	57.0193	2.56179e-145	281.32	1	166.301	4.43261e-22	184.87	1	210.149	1.78674e-36	210.15	1	213.376	7.82303e-37	213.38	1	134.807	6.91847e-45	219.92	1	158.011	3.9502e-20	158.01	N	LLWKTPLAKFDRYRLNYSLPTGQWVGVQLPR	X;X;X;X;X;X;X;X;X;X;X;X;X;X;X;Deamidation 18O (N);X;X;X;X;X;X;X;X;X;X;X;X;X;X;X
1009	P24821	Tenascin (TN) (Cytotactin) (GMEM) (GP 150-225) (Glioma-associated-extracellular matrix antigen) (Hexabrachion) (JI) (Myotendinous antigen) (Neuronectin) (Tenascin-C) (TN-C)	TNC HXB	P24821	1	96.4916	0.0177908	96.492	37.574	96.492																					1	91.8534	0.0200494	91.853	1	96.4916	0.0177908	96.492									N	FIIQVQEANKVEAARNLTVPGSLRAVDIPGL	X;X;X;X;X;X;X;X;X;X;X;X;X;X;X;Deamidation 18O (N);X;X;X;X;X;X;X;X;X;X;X;X;X;X;X
1010	P24821	Tenascin (TN) (Cytotactin) (GMEM) (GP 150-225) (Glioma-associated-extracellular matrix antigen) (Hexabrachion) (JI) (Myotendinous antigen) (Neuronectin) (Tenascin-C) (TN-C)	TNC HXB	P24821	1	107.594	0.0039957	130.77	107.46	107.59													1	117.16	0.00770001	117.16	1	128.566	0.00434977	128.57	1	130.765	0.0039957	130.77	1	117.16	0.00770001	117.16	1	114.783	0.0086874	114.78	1	107.594	0.0146472	107.59	N	YSLPTGQWVGVQLPRNTTSYVLRGLEPGQEY	X;X;X;X;X;X;X;X;X;X;X;X;X;X;X;Deamidation 18O (N);X;X;X;X;X;X;X;X;X;X;X;X;X;X;X
1011	P24821	Tenascin (TN) (Cytotactin) (GMEM) (GP 150-225) (Glioma-associated-extracellular matrix antigen) (Hexabrachion) (JI) (Myotendinous antigen) (Neuronectin) (Tenascin-C) (TN-C)	TNC HXB	P24821	1	134.369	7.36499e-67	220.65	200.53	220.65													1	126.569	1.29807e-57	206.85	0.987885	19.1568	0.0191848	44.312	0.999162	30.7908	0.0047995	59.539	1	134.369	7.36499e-67	220.65	1	101.841	5.53591e-40	174.71	1	99.6591	4.51909e-42	185.16	N	GVLKKVIRHKRQSGVNATLPEENQPVVFNHV	X;X;X;X;X;X;X;X;X;X;X;X;X;X;X;Deamidation 18O (N);X;X;X;X;X;X;X;X;X;X;X;X;X;X;X
1012	P24821	Tenascin (TN) (Cytotactin) (GMEM) (GP 150-225) (Glioma-associated-extracellular matrix antigen) (Hexabrachion) (JI) (Myotendinous antigen) (Neuronectin) (Tenascin-C) (TN-C)	TNC HXB	P24821	1	101.595	4.04119e-65	245.69	214.27	101.6					1	120.574	0.000282473	120.57					1	84.4793	6.69392e-43	234.17	1	55.2131	2.78865e-31	218.75	1	203.515	1.76312e-17	203.51	1	237.491	2.58566e-52	237.49	1	104.175	4.04119e-65	245.69	1	101.595	6.41268e-55	243.4	N	FVIQVQEVNKVEAAQNLTLPGSLRAVDIPGL	X;X;X;X;X;X;X;X;X;X;X;X;X;X;X;Deamidation 18O (N);X;X;X;X;X;X;X;X;X;X;X;X;X;X;X
1013	P24821	Tenascin (TN) (Cytotactin) (GMEM) (GP 150-225) (Glioma-associated-extracellular matrix antigen) (Hexabrachion) (JI) (Myotendinous antigen) (Neuronectin) (Tenascin-C) (TN-C)	TNC HXB	P24821	1	78.0923	3.81971e-48	175.08	161.43	113.4																									1	78.0923	1.74291e-06	130.32					0.5	0	3.81971e-48	175.08	N	YRNCHRVNLMGRYGDNNHSQGVNWFHWKGHE	X;X;X;X;X;X;X;X;X;X;X;X;X;X;X;Deamidation 18O (N);Deamidation 18O (N);X;X;X;X;X;X;X;X;X;X;X;X;X;X
1014	P24821	Tenascin (TN) (Cytotactin) (GMEM) (GP 150-225) (Glioma-associated-extracellular matrix antigen) (Hexabrachion) (JI) (Myotendinous antigen) (Neuronectin) (Tenascin-C) (TN-C)	TNC HXB	P24821	1	68.3818	3.81971e-48	208.38	189.8	113.4													0.89771	9.43302	1.24888e-29	208.38									1	68.3818	1.74291e-06	130.32	0.870627	8.2799	1.8751e-14	147.7	0.5	0	3.81971e-48	175.08	N	RNCHRVNLMGRYGDNNHSQGVNWFHWKGHEH	X;X;X;X;X;X;X;X;X;X;X;X;X;X;Deamidation 18O (N);Deamidation 18O (N);X;X;X;X;X;X;X;X;X;X;X;X;X;X;X
1015	Q59GD4	Collagen, type V, alpha 3 preproprotein variant (Fragment)		Q59GD4	1	251.912	4.42906e-73	251.91	198.69	251.91													1	155.663	2.13698e-14	155.66									1	126.319	9.14509e-06	126.32	1	251.912	4.42906e-73	251.91					N	_ENFSLLITLRGQPANQSVLLSIYDERGARQ	X;X;X;X;X;X;X;X;X;X;X;X;X;X;X;Deamidation 18O (N);X;X;X;X;X;X;X;X;X;X;X;X;X;X;X
1016	P27487	Dipeptidyl peptidase 4 (EC 3.4.14.5) (ADABP) (Adenosine deaminase complexing protein 2) (ADCP-2) (Dipeptidyl peptidase IV) (DPP IV) (T-cell activation antigen CD26) (TP103) (CD antigen CD26) [Cleaved into: Dipeptidyl peptidase 4 membrane form (Dipeptidyl peptidase IV membrane form); Dipeptidyl peptidase 4 soluble form (Dipeptidyl peptidase IV soluble form)]	DPP4 ADCP2 CD26	P27487	0.5	0	1.05369e-14	172.26	161.21	157.58													0.5	0	3.2789e-06	127.62					0.5	0	0.0255922	51.265	0.5	0	6.13179e-05	106.38	0.5	0	1.37143e-14	172.26	0.5	0	1.05369e-14	157.58	N	YDLNKRQLITEERIPNNTQWVTWSPVGHKLA	X;X;X;X;X;X;X;X;X;X;X;X;X;X;X;Deamidation 18O (N);X;X;X;X;X;X;X;X;X;X;X;X;X;X;X
1017	P27487	Dipeptidyl peptidase 4 (EC 3.4.14.5) (ADABP) (Adenosine deaminase complexing protein 2) (ADCP-2) (Dipeptidyl peptidase IV) (DPP IV) (T-cell activation antigen CD26) (TP103) (CD antigen CD26) [Cleaved into: Dipeptidyl peptidase 4 membrane form (Dipeptidyl peptidase IV membrane form); Dipeptidyl peptidase 4 soluble form (Dipeptidyl peptidase IV soluble form)]	DPP4 ADCP2 CD26	P27487	0.5	0	1.05369e-14	172.26	161.21	157.58													0.5	0	3.2789e-06	127.62					0.5	0	0.0255922	51.265	0.5	0	6.13179e-05	106.38	0.5	0	1.37143e-14	172.26	0.5	0	1.05369e-14	157.58	N	DLNKRQLITEERIPNNTQWVTWSPVGHKLAY	X;X;X;X;X;X;X;X;X;X;X;X;X;X;X;X;X;X;X;X;X;X;X;X;X;X;X;X;X;X;X
1018	P27487	Dipeptidyl peptidase 4 (EC 3.4.14.5) (ADABP) (Adenosine deaminase complexing protein 2) (ADCP-2) (Dipeptidyl peptidase IV) (DPP IV) (T-cell activation antigen CD26) (TP103) (CD antigen CD26) [Cleaved into: Dipeptidyl peptidase 4 membrane form (Dipeptidyl peptidase IV membrane form); Dipeptidyl peptidase 4 soluble form (Dipeptidyl peptidase IV soluble form)]	DPP4 ADCP2 CD26	P27487	1	130.068	4.3604e-08	130.07	124.58	130.07													1	130.068	4.3604e-08	130.07																					N	ATQERISLQWLRRIQNYSVMDICDYDESSGR	X;X;X;X;X;X;X;X;X;X;X;X;X;X;X;Deamidation 18O (N);X;X;X;X;X;X;X;X;X;X;X;X;X;X;X
1019	P27487	Dipeptidyl peptidase 4 (EC 3.4.14.5) (ADABP) (Adenosine deaminase complexing protein 2) (ADCP-2) (Dipeptidyl peptidase IV) (DPP IV) (T-cell activation antigen CD26) (TP103) (CD antigen CD26) [Cleaved into: Dipeptidyl peptidase 4 membrane form (Dipeptidyl peptidase IV membrane form); Dipeptidyl peptidase 4 soluble form (Dipeptidyl peptidase IV soluble form)]	DPP4 ADCP2 CD26	P27487	1	85.3773	6.66522e-22	168.85	132.42	85.377													1	168.846	0.000398027	168.85	1	96.7446	0.0311689	96.745					1	159.99	6.66522e-22	159.99	1	85.3773	7.45193e-09	140.24					N	QNVQMPSKKLDFIILNETKFWYQMILPPHFD	X;X;X;X;X;X;X;X;X;X;X;X;X;X;X;Deamidation 18O (N);X;X;X;X;X;X;X;X;X;X;X;X;X;X;X
1020	P33908	Mannosyl-oligosaccharide 1,2-alpha-mannosidase IA (EC 3.2.1.113) (Man(9)-alpha-mannosidase) (Man9-mannosidase) (Mannosidase alpha class 1A member 1) (Processing alpha-1,2-mannosidase IA) (Alpha-1,2-mannosidase IA)	MAN1A1	P33908	1	75.2127	0.0171295	75.213	56.43	75.213					1	60.6819	0.0279277	60.682									1	75.2127	0.0171295	75.213																	N	LELGAEIARTCHESYNRTFMKLGPEAFRFDG	X;X;X;X;X;X;X;X;X;X;X;X;X;X;X;Deamidation 18O (N);X;X;X;X;X;X;X;X;X;X;X;X;X;X;X
1021	Q7Z5Y6	Bone morphogenetic protein 8A (BMP-8A)	BMP8A	Q7Z5Y6	1	78.1489	0.00657257	112.17	68.925	78.149	1	69.4234	0.0403476	69.423	1	96.2529	0.0340631	96.253					1	98.2993	0.0166014	98.299					1	57.5896	0.00657257	112.17									1	78.1489	0.0167656	78.149	N	AAEFRIYKVPSIHLLNRTLHVSMFQVVQEQS	X;X;X;X;X;X;X;X;X;X;X;X;X;X;X;Deamidation 18O (N);X;X;X;X;X;X;X;X;X;X;X;X;X;X;X
1022	P43652	Afamin (Alpha-albumin) (Alpha-Alb)	AFM ALB2 ALBA	P43652	0.997657	26.2923	0.019555	84.522	20.957	84.522					0.997657	26.2923	0.019555	84.522					0.853314	7.6472	0.0393242	68.557					0.970638	15.1926	0.0414749	71.451					0.993038	21.5424	0.0264908	80.787					N	ESLTLPTQPRDIENFNSTQKFIEDNIEYITI	X;X;X;X;X;X;X;X;X;X;X;X;X;X;X;Deamidation 18O (N);X;X;X;X;X;X;X;X;X;X;X;X;X;X;X
1023	P43652	Afamin (Alpha-albumin) (Alpha-Alb)	AFM ALB2 ALBA	P43652	1	109.664	0.00375236	109.66	97.617	109.66													1	109.664	0.00375236	109.66																					N	LQEKICAMEGLPQKHNFSHCCSKVDAQRRLC	X;X;X;X;X;X;X;X;X;X;X;X;X;X;X;Deamidation 18O (N);X;X;X;X;X;X;X;X;X;X;X;X;X;X;X
1024	P43652	Afamin (Alpha-albumin) (Alpha-Alb)	AFM ALB2 ALBA	P43652	1	277.102	1.57517e-257	277.1	226.04	277.1									1	73.4663	0.027266	73.466	1	214.26	1.79477e-18	214.26													1	138.236	1.35733e-71	257.8	1	277.102	1.57517e-257	277.1	N	TENPPGCYRYAEDKFNETTEKSLKMVQQECK	X;X;X;X;X;X;X;X;X;X;X;X;X;X;X;Deamidation 18O (N);X;X;X;X;X;X;X;X;X;X;X;X;X;X;X
1025	P47972	Neuronal pentraxin-2 (NP2) (Neuronal pentraxin II) (NP-II)	NPTX2	P47972	1	89.4035	0.00228192	89.403	62.731	89.403													1	89.4035	0.00228192	89.403																					N	LRKVAELEDEKSLLHNETSAHRQKTESTLNA	X;X;X;X;X;X;X;X;X;X;X;X;X;X;X;Deamidation 18O (N);X;X;X;X;X;X;X;X;X;X;X;X;X;X;X
1026	P51888	Prolargin (Proline-arginine-rich end leucine-rich repeat protein)	PRELP SLRR2A	P51888	1	58.831	4.80843e-27	126.63	109.55	58.831					1	62.3783	1.22618e-06	109.41	0.52081	0	4.80843e-27	126.63													1	58.831	0.00153002	58.831					0.500013	0	1.61965e-10	91.032	N	KVPVIPPRIHYLYLQNNFITELPVESFQNAT	X;X;X;X;X;X;X;X;X;X;X;X;X;X;X;Deamidation 18O (N);Deamidation 18O (N);X;X;X;X;X;X;X;X;X;X;X;Deamidation 18O (N);X;X
1027	P51888	Prolargin (Proline-arginine-rich end leucine-rich repeat protein)	PRELP SLRR2A	P51888	1	58.831	2.88895e-140	210.67	193.98	58.831					1	62.3783	1.22618e-06	109.41	0.866144	8.10954	5.12941e-53	155.2	0.970474	15.1678	7.23763e-18	115.01									1	58.831	2.88895e-140	210.67					0.971507	15.3271	3.66186e-24	116.74	N	VPVIPPRIHYLYLQNNFITELPVESFQNATG	X;X;X;X;X;X;X;X;X;X;X;X;X;X;Deamidation 18O (N);Deamidation 18O (N);X;X;X;X;X;X;X;X;X;X;X;Deamidation 18O (N);X;X;X
1028	P51888	Prolargin (Proline-arginine-rich end leucine-rich repeat protein)	PRELP SLRR2A	P51888	1	58.831	0	332.39	315.31	58.831	1	163.488	5.01211e-130	257.35	1	62.3783	2.40024e-164	276.34	1	171.234	1.07114e-183	281.68	1	189.316	1.5024e-146	268.13	1	238.394	8.07307e-229	302.64	1	163.332	8.12266e-70	207.17	1	58.831	0	332.39	1	178.248	8.33621e-206	296.52	1	223.514	9.85755e-254	309.35	N	LQNNFITELPVESFQNATGLRWINLDNNRIR	X;X;Deamidation 18O (N);Deamidation 18O (N);X;X;X;X;X;X;X;X;X;X;X;Deamidation 18O (N);X;X;X;X;X;X;X;X;X;X;X;X;X;X;X
1029	P51888	Prolargin (Proline-arginine-rich end leucine-rich repeat protein)	PRELP SLRR2A	P51888;Q6FHG6	1	143.604	2.06325e-85	220.17	209.84	148.87	1	143.604	4.68674e-53	178.42	1	120.083	6.0586e-71	209.4	1	110.041	5.52288e-58	188.69	1	91.74	5.45316e-58	188.8	1	137.381	7.71254e-74	185.06	1	123.384	1.57059e-58	195.01	1	127.561	3.58033e-80	220.17	1	85.9657	1.08898e-59	197.37	1	87.1316	2.06325e-85	198.09	N	RLEHLYLNNNSIEKINGTQICPNDLVAFHDF	X;X;X;X;X;X;X;Deamidation 18O (N);Deamidation 18O (N);X;X;X;X;X;X;Deamidation 18O (N);X;X;X;X;X;X;Deamidation 18O (N);X;X;X;X;X;X;X;X
[truncated: 229 more rows]
[truncated: 34 more columns]

## Sheet: CK-369
ID	Protein	Protein names	Gene names	Intensity CK1	Intensity CK2	Intensity CK3	Intensity KBD1	Intensity KBD2	Intensity KBD3	Intensity OA1	Intensity OA2	Intensity OA3	CK Q Number	KBD Q Number	QA Q Number	Localization prob	Score diff	PEP	Score	Delta score	Score for localization	Localization prob CK1	Score diff CK1	PEP CK1	Score CK1	Localization prob CK2	Score diff CK2	PEP CK2	Score CK2	Localization prob CK3	Score diff CK3	PEP CK3	Score CK3	Localization prob KBD1	Score diff KBD1	PEP KBD1	Score KBD1	Localization prob KBD2	Score diff KBD2	PEP KBD2	Score KBD2	Localization prob KBD3	Score diff KBD3	PEP KBD3	Score KBD3	Localization prob OA1	Score diff OA1	PEP OA1	Score OA1
[truncated: 369 more rows]
[truncated: 36 more columns]

[truncated: 2 more sheets: KBD-430, OA-519]
