# Supplementary material for: Identification of N-Glycoproteins of Knee Cartilage from Adult Osteoarthritis and Kashin-Beck Disease Based on Quantitative Glycoproteomics, Compared with Normal Control Cartilage
Source: Cells. 2022 Aug 12;11(16):2513. doi: 10.3390/cells11162513 (PMC9406367; doi:10.3390/cells11162513)
Supplement: Supplementary file 1 [file cells-11-02513-s001.zip › Table S7 Significant-GlycoProtein-analysis.xlsx]

## Sheet: DEP-Site-Analysis
ID	Protein	Protein names	Gene names	Ratio KBD/CK	P Value KBD/CK	Ratio OA/CK	P Value OA/CK	Ratio KBD/OA	P Value KBD/OA	Significant KBD/CK	Significant OA/CK	Significant KBD/OA	CK Q Number	KBD Q Number	QA Q Number	CK1	CK2	CK3	KBD1	KBD2	KBD3	OA1	OA2	OA3	Average CK	Average KBD	Average OA	Localization prob	Score diff	PEP	Score	Delta score	Score for localization	Localization prob CK1	Score diff CK1	PEP CK1	Score CK1	Localization prob CK2	Score diff CK2	PEP CK2	Score CK2	Localization prob CK3	Score diff CK3	PEP CK3	Score CK3	Localization prob KBD1	Score diff KBD1	PEP KBD1	Score KBD1
0	H8WV86	MHC class II antigen (Fragment)	HLA-DRB1							None	None	None	0	1	0				82048000									1	102.085	0.000453297	102.08	83.3	102.08													1	102.085	0.000453297	102.08
1	A0T4C3	Truncated MHC class II antigen (Fragment)	HLA-DRB1							KBD Unique	None	KBD Unique	0	2	0				171210000		70327000					120768500		1	116.026	3.1252e-26	220.81	206.02	116.03													1	169.993	3.1252e-26	220.81
2	A0A180H6N8	MHC class II antigen (Fragment)	HLA-DRB4							None	None	None	0	1	0				7154800									1	92.9251	0.0023701	92.925	84.412	92.925													1	92.9251	0.0023701	92.925
3	Q31639	DRB1 transplantation antigen (Fragment)	HLA-DRB1							None	None	None	0	1	0				103340000									1	44.2994	0.00227012	99.5	83.744	44.299													1	99.4999	0.00227012	99.5
4	Q2HQJ5	MHC class I antigen (Fragment)	HLA-A	8.50551	0.231666	23.1523	0.319884	0.367372	0.358823	None	None	None	2	3	2	10230000		11645000	168540000	89137000	21410000	68556000		437900000	10937500	93029000	253228000	1	180.479	6.26325e-228	322.58	23.397	180.48	1	100.454	0.00111329	100.45					1	106.525	0.000718427	106.52	1	322.58	6.26325e-228	322.58
5	Q5TB53	Transmembrane 9 superfamily member (Fragment)	TM9SF3			37.5361	0.175406			None	None	None	2	1	3	11031000	22556000		145480000			281970000	1159500000	449620000	16793500		6.30363e+08	1	118.712	2.69177e-05	156.83	119.28	118.71	1	67.7257	0.0451295	67.726	1	102.062	0.00477044	102.06					1	144.65	3.28553e-05	144.65
6	Q9P073	HSPC309 (Fragment)								None	None	None	0	1	0				7498800									1	93.6488	0.00450092	108.98	70.739	93.649													1	108.977	0.00450092	108.98
7	K7ES70	Microfibril-associated glycoprotein 4	MFAP4	1.16386	0.652525	8.41392	0.0219162	0.138326	0.0238463	None	Up	Down	3	3	2	158350000	128050000	75092000	180590000	75806000	164330000	1283700000		744010000	1.20497e+08	140242000	1013855000	1	93.1624	6.52713e-13	210.1	176.36	93.162	1	175.376	0.00278321	175.38	1	210.095	6.52713e-13	210.1	1	178.831	0.00210187	178.83	1	187	0.00036673	187
8	K7ES70	Microfibril-associated glycoprotein 4	MFAP4	0.806618	0.825515					None	None	None	2	2	1		551460000	519500000	844830000		19026000		3115800000		535480000	431928000		0.966202	14.5618	7.3857e-270	343.61	301.27	188.96					0.966202	14.5618	1.24684e-12	188.96	0.819874	6.5817	7.3857e-270	343.61	0.853241	7.64465	9.54721e-11	186.74
9	K7ES70	Microfibril-associated glycoprotein 4	MFAP4							None	OA Unique	OA Unique	0	0	2							3929200000		3028600000			3478900000	0.602389	1.80418	5.31727e-79	259.35	232.46	259.35
10	A0A024QZ95	Olfactomedin 4, isoform CRA_a	OLFM4 hCG_29567							None	None	None	0	0	0													1	179.17	3.13142e-82	179.17	153.64	179.17
11	M0R122	Epithelial membrane protein 3	EMP3							None	None	None	0	1	0				60144000									0.736167	4.45648	2.86638e-59	238.87	231.26	238.87													0.736167	4.45648	2.86638e-59	238.87
12	M0R122	Epithelial membrane protein 3	EMP3			11.8961	0.00375681			CK Unique	Up	OA Unique	3	0	2	17492000	27069000	24996000					316700000	234940000	2.31857e+07		275820000	0.841664	7.25559	0	304.51	287.49	205.8	0.841664	7.25559	8.60041e-24	205.8	0.84087	7.22975	1.45456e-18	193.81	0.817311	6.50676	1.25102e-72	250.69
13	M0R266	IgG receptor FcRn large subunit p51 (Fragment)	FCGRT							None	None	None	0	1	0				20497000									1	271.683	2.43637e-299	302.84	270.22	271.68													1	302.839	1.46495e-214	302.84
14	Q53FJ5	Prosaposin (Variant Gaucher disease and variant metachromatic leukodystrophy) variant (Fragment)								None	OA Unique	None	0	1	2				24548000			63941000	111350000				87645500	1	66.8529	4.29106e-70	240.59	216.74	66.853	1	66.8529	0.00386778	66.853									1	205.801	5.04049e-18	205.8
15	Q53FJ5	Prosaposin (Variant Gaucher disease and variant metachromatic leukodystrophy) variant (Fragment)								None	None	None	0	0	0													1	60.307	0.01314	60.307	52.653	60.307													1	60.307	0.01314	60.307
16	Q53FJ5	Prosaposin (Variant Gaucher disease and variant metachromatic leukodystrophy) variant (Fragment)						0.0674746	0.00364458	KBD Unique	OA Unique	Down	0	3	2				24541000	32720000	19322000		434850000	321810000		2.55277e+07	378330000	1	138.726	4.12112e-34	210.34	196.25	138.73													1	143.929	1.19272e-09	143.93
17	A0A024QZU7	Phosphatidic acid phosphatase type 2A, isoform CRA_b	PPAP2A hCG_39580							None	OA Unique	None	0	1	3				18768000			102830000	90087000	55614000			8.28437e+07	1	135.098	9.12993e-66	251.03	217.16	135.1													1	86.9106	0.00397836	86.911
18	H0YAF9	Follistatin (Fragment)	FST							None	None	None	0	1	0				19528000									1	147.561	6.82852e-19	147.56	146.57	147.56													1	147.561	6.82852e-19	147.56
19	C9JNZ3	Butyrophilin subfamily 3 member A3 (Fragment)	BTN3A3							None	None	None	0	1	1				9945300			19596000						1	70.389	0.000112501	123.79	92.503	70.389													1	86.3444	0.000112501	123.79
20	A0A024R035	Complement component 9, isoform CRA_a	C9 hCG_37544							None	None	None	0	0	0													1	69.0069	1.09274e-18	139.64	117.44	139.64													0.999083	30.3727	3.60568e-05	102.64
21	B4E385	cDNA FLJ52846, highly similar to Homo sapiens matrix-remodelling associated 8 (MXRA8), mRNA								None	None	None	0	1	1				64856000				194550000					1	142.233	2.18977e-16	142.23	128.4	142.23													1	68.369	0.00502347	68.369
22	Q5PY19	Transforming growth factor beta 1 (Fragment)								None	None	None	0	1	0				17011000									0.994863	22.8705	0.00391281	124.34	115.66	122.79													0.992221	21.0569	0.0444746	124.34
23	B4DEL6	cDNA FLJ59669, highly similar to Homo sapiens phospholipase D family, member 3 (PLD3), transcript variant 1, mRNA								None	None	None	1	1	0		4739600		4546100									1	168.829	1.61794e-05	168.83	136.31	168.83					1	107.831	0.00352671	107.83					1	141.879	3.66941e-05	141.88
24	B5MC36	Glutathione hydrolase 1 proenzyme	GGT1							None	None	None	0	0	1							22614000						0.999729	35.6621	0.0142874	64.675	44.294	64.675
25	B0QY60	SUN domain-containing protein 2 (Fragment)	SUN2							None	None	None	1	1	0		12837000		44495000									1	115.175	0.00104956	115.18	47.183	115.18					1	87.1843	0.00683207	87.184					1	115.175	0.00104956	115.18
26	Q6ZME7	Peptidylprolyl isomerase (EC 5.2.1.8)								None	None	None	0	1	0				10274000									1	61.1666	0.00307242	74.12	49.184	61.167													1	74.1196	0.00307242	74.12
27	Q6ZME7	Peptidylprolyl isomerase (EC 5.2.1.8)								None	OA Unique	None	0	1	3				7034600			6410200	49405000	28442000			2.80857e+07	1	114.742	4.18832e-09	169.23	112.82	114.74													1	83.6332	0.0023118	83.633
28	Q6ZME7	Peptidylprolyl isomerase (EC 5.2.1.8)		4.26686	0.0906703	28.123	0.14623	0.151722	0.0921562	None	None	None	2	3	3	40603000	26897000		212690000	104800000	114530000	540610000	1674300000	632540000	33750000	1.44007e+08	949150000	1	241.546	0	342.85	334.98	263.01	1	98.2624	2.21522e-08	99.987	1	157.37	9.58396e-46	158.06					1	236.967	2.48821e-118	238.73
29	Q6ZME7	Peptidylprolyl isomerase (EC 5.2.1.8)		4.42454	0.181597	93.4762	0.1083	0.0473333	0.118434	None	None	None	3	3	3	20514000	14607000	20733000	156370000	21781000	68977000	1128400000	3392500000	700120000	18618000	82376000	1740340000	1	92.6707	0	403.17	388.49	92.671	1	131.306	5.55205e-12	131.31	1	133.948	3.59273e-14	133.95	1	138.75	1.57614e-14	138.75	1	85.9738	4.23537e-111	234.67
30	Q6ZME7	Peptidylprolyl isomerase (EC 5.2.1.8)						0.336059	0.15289	None	None	None	1	3	3			5042300	99523000	15366000	42173000	66685000	250710000	149970000		52354000	1.55788e+08	1	96.2296	1.82733e-12	202.56	180	96.23					1	112.644	0.000980995	112.64	1	70.5404	0.0232637	70.54	1	135.938	1.82733e-12	202.56
31	Q6ZME7	Peptidylprolyl isomerase (EC 5.2.1.8)		6.86449	0.130625	32.0279	0.0282044	0.214329	0.0608426	None	Up	None	3	3	3	26463000	14987000	17883000	251840000	45031000	110420000	524930000	989310000	386070000	1.97777e+07	1.35764e+08	6.33437e+08	1	187.394	0	454.32	432.09	187.39	1	90.4441	7.85437e-12	130.46	1	159.802	7.15774e-26	159.8	1	109.892	1.69504e-05	109.89	1	131.666	2.62336e-29	174.65
32	A0A024R1Y9	Contactin associated protein 1, isoform CRA_a	CNTNAP1 hCG_16945							None	None	None	0	0	0													1	128.484	0.000835826	128.48	57.125	128.48
33	S5MD53	Neurotrophic tyrosine receptor kinase type 2 (Fragment)								KBD Unique	None	KBD Unique	0	2	0				7687200	7530600						7608900		1	64.7982	8.20531e-05	126.09	106.35	64.798													1	126.086	8.20531e-05	126.09
34	S5MD53	Neurotrophic tyrosine receptor kinase type 2 (Fragment)								None	OA Unique	None	0	1	3				12780000			47274000	60139000	46007000			51140000	1	123.625	3.14589e-05	159.4	104.85	123.63													1	104.221	0.00443955	104.22
35	Q9HBQ7	Cathepsin L, isoform CRA_b	CTSL hCG_30369			6.72375	0.0724933			None	None	None	2	1	2	12688000		13386000	29504000			66395000		108920000	13037000		87657500	1	119.386	2.9255e-09	162.93	121.05	119.39	1	85.5541	0.00450786	85.554					1	119.386	0.000341567	119.39	1	162.925	2.9255e-09	162.93
36	B1APY4	Receptor tyrosine kinase-like orphan receptor 2, isoform CRA_b (Tyrosine-protein kinase transmembrane receptor ROR2)	ROR2 hCG_1985325							None	None	None	0	1	0				5682300									1	65.0429	0.0193153	65.043	59.866	65.043													1	65.0429	0.0193153	65.043
37	K7EQG0	GPI ethanolamine phosphate transferase 1 (Fragment)	PIGN							None	None	None	0	0	0													1	113.741	1.42282e-05	122.55	97.161	122.55
38	Q8N9Q8	cDNA FLJ36731 fis, clone UTERU2012703, highly similar to LAMININ BETA-2 CHAIN								None	None	None	0	1	0				15927000									1	132.075	1.14752e-12	133.16	86.204	133.16													1	132.075	1.14752e-12	133.16
39	Q8N9Q8	cDNA FLJ36731 fis, clone UTERU2012703, highly similar to LAMININ BETA-2 CHAIN								None	None	None	0	0	0													1	147.156	1.57202e-11	147.16	80.163	147.16
40	A0A024R3C4	KDEL (Lys-Asp-Glu-Leu) containing 2, isoform CRA_a	KDELC2 hCG_39502	7.40396	0.457192					None	None	None	2	2	1	116110000	154070000		1946500000	53901000				5426900000	135090000	1000200500		1	81.3778	7.11496e-157	289.71	234.65	289.71	0.999462	32.6922	6.34659e-31	215.72	0.99948	32.8338	1.59468e-37	218.01					1	81.3778	7.11496e-157	289.71
41	A0A024R3J7	HCG2032701, isoform CRA_a	hCG_2032701							None	None	None	0	0	1							44127000						0.962823	14.1999	0.00830573	68.481	57.996	68.481
42	A0A024R3J7	HCG2032701, isoform CRA_a	hCG_2032701	6.41143	0.122791	36.1135	0.21578	0.177535	0.408198	None	None	None	3	2	3	40339000	52918000	40508000	437550000		134200000	44127000	3645700000	1140900000	4.45883e+07	285875000	1.61024e+09	0.999944	42.677	2.07412e-263	302.15	245.93	302.15	0.895107	9.7972	2.10819e-12	149.44	0.912868	10.2037	1.90487e-16	186.95	0.910562	10.0795	1.02776e-14	174.17	0.999944	42.677	2.07412e-263	302.15
43	A0A024R3J7	HCG2032701, isoform CRA_a	hCG_2032701							None	None	None	0	0	1							1634100000						0.647812	2.64674	1.90487e-16	186.95	151.31	186.95
44	H0Y7Y8	AT-rich interactive domain-containing protein 4B (Fragment)	ARID4B	0.472597	0.0357424	1.82192	0.0603482	0.259395	0.015458	Down	None	Down	3	3	3	1180500000	1474100000	1079700000	935930000	441340000	387550000	1515800000	2649800000	2638000000	1.24477e+09	5.88273e+08	2.26787e+09	0.687764	3.42956	0.00352731	134.66	43.678	122.5	0.5	0	0.00643153	120.52	0.5	0	0.0176248	102.77	0.5	0	0.0100808	113.1	0.5	0	0.00352731	134.66
45	H0Y7Y8	AT-rich interactive domain-containing protein 4B (Fragment)	ARID4B	0.664162	0.179735	1.8762	0.0369718	0.353993	0.0203309	None	None	Down	3	3	3	1180500000	1474100000	1079700000	935930000	1156700000	387550000	2688500000	2649800000	1668000000	1.24477e+09	8.26727e+08	2.33543e+09	0.890845	9.11759	0.00352731	134.66	43.678	134.12	0.5	0	0.00643153	120.52	0.825728	6.75608	0.00638481	120.65	0.888814	9.02759	0.00473	126.2	0.5	0	0.00352731	134.66
46	C9JN98	Glia-derived nexin (Fragment)	SERPINE2			3.1491	0.00287616			CK Unique	Up	OA Unique	3	0	2	110330000	91274000	56451000					267810000	273950000	8.60183e+07		270880000	1	208.556	1.68631e-18	208.56	189.24	208.56	1	171.616	1.76815e-05	171.62	1	166.692	1.69094e-05	166.69	1	193.965	7.08364e-09	193.96
47	A0A024R462	Fibronectin 1, isoform CRA_n	FN1 hCG_1813428							None	None	None	0	0	0													1	88.6835	1.17199e-18	88.683	80.209	88.683					1	88.6835	1.17199e-18	88.683
48	A0A024R462	Fibronectin 1, isoform CRA_n	FN1 hCG_1813428							None	None	None	1	0	1			1672800000					304720000					1	44.5954	1.52728e-39	186.39	161.37	44.595					1	61.6835	0.00025659	84.759	0.5	0	9.10795e-08	126.48
49	A0A024R462	Fibronectin 1, isoform CRA_n	FN1 hCG_1813428	1.02886	0.980101	13.5182	0.000445883	0.0761092	0.00112522	None	Up	Down	3	3	3	4985100000	14716000000	4572500000	24627000000	51996000	295110000	105900000000	95915000000	126320000000	8091200000	8324702000	1.09378e+11	1	44.5954	0	392.71	359.48	44.595	0.999946	42.686	0	384.53	1	61.6835	0	392.71	0.998707	28.8778	2.43975e-68	242.09	0.992926	21.4728	1.03261e-67	237.81
50	A0A024R462	Fibronectin 1, isoform CRA_n	FN1 hCG_1813428							None	None	None	1	0	0		180300000											1	115.978	2.02335e-58	192.18	172.6	115.98	1	66.1196	0.00328433	66.12	1	113.253	8.68371e-10	113.25	1	192.178	2.02335e-58	192.18	1	68.5672	0.00173197	68.567
51	A0A024R462	Fibronectin 1, isoform CRA_n	FN1 hCG_1813428	1.67752	0.694423	0.118068	0.0028794	14.2081	0.505656	None	Down	None	3	3	2	5478300000	5408400000	6758600000	28711000000	203140000	686210000	561090000	827810000		5.88177e+09	9.86678e+09	694450000	1	115.978	0	357.92	310.88	115.98	1	66.1196	1.27702e-251	319.91	1	113.253	1.52433e-251	318.74	1	192.178	0	335.22	1	68.5672	0	357.92
52	A0A024R462	Fibronectin 1, isoform CRA_n	FN1 hCG_1813428							None	None	None	0	0	0													0.562784	1.10245	8.39432e-09	79.388	71.723	79.388	0.562784	1.10245	8.39432e-09	79.388
53	A0A024R462	Fibronectin 1, isoform CRA_n	FN1 hCG_1813428							None	None	None	0	0	0													0.500575	0	2.88985e-06	70.107	64.563	70.107
54	A0A024R462	Fibronectin 1, isoform CRA_n	FN1 hCG_1813428							None	None	None	0	0	0													0.542241	0.679466	2.88985e-06	70.107	64.563	70.107
55	A0A024R462	Fibronectin 1, isoform CRA_n	FN1 hCG_1813428							None	None	None	0	0	0													0.508939	0	6.38342e-05	62.377	57.757	62.377
56	A0A024R462	Fibronectin 1, isoform CRA_n	FN1 hCG_1813428	1.76915	0.591499	10.7053	0.0259625	0.16526	0.0433082	None	Up	Down	3	3	3	53313000	124340000	39383000	310120000	16346000	57503000	1015400000	374070000	933960000	7.23453e+07	1.2799e+08	7.74477e+08	0.999953	43.403	0	383.82	370.72	299.36	0.965676	15.2015	2.4435e-52	174.86	0.976248	16.7493	3.28659e-91	229.95	0.997215	26.1098	4.00578e-52	171.98	0.999953	43.403	5.89763e-230	299.36
57	A0A024R462	Fibronectin 1, isoform CRA_n	FN1 hCG_1813428	1.5543	0.037453	12.03	0.0334189	0.129202	0.0389512	None	Up	Down	3	3	3	368020000	501990000	636510000	751050000	717420000	873110000	9229500000	3247500000	5646400000	5.02173e+08	7.80527e+08	6.04113e+09	1	103.041	0	442.46	373.11	103.04	1	104.257	5.27333e-86	254.94	1	127.297	0	357.66	1	217.502	3.79077e-73	251.28	1	109.361	1.33911e-59	238.58
58	A0A024R462	Fibronectin 1, isoform CRA_n	FN1 hCG_1813428	1.6433	0.263684	12.45	0.0895809	0.131993	0.103382	None	None	None	3	3	3	13995000	32832000	14881000	49194000	21577000	30634000	235530000	84642000	448090000	2.05693e+07	3.38017e+07	2.56087e+08	1	147.831	0.00337811	154.35	93.389	147.83	1	98.4179	0.0197747	98.418	1	154.35	0.00432811	154.35	1	117.16	0.00770001	117.16	1	134.056	0.0035526	134.06
59	A0A024R462	Fibronectin 1, isoform CRA_n	FN1 hCG_1813428							None	None	None	0	1	0				7944000									0.999994	52.3818	0.000633731	99.927	71.294	99.927													0.999994	52.3818	0.000633731	99.927
60	A0A024R462	Fibronectin 1, isoform CRA_n	FN1 hCG_1813428							None	None	None	0	0	0													0.999927	41.36	7.63977e-05	77.372	59.628	72.321
61	C9J4Y6	Glypican-1 (Fragment)	GPC1							None	CK Unique	None	2	1	0		6984800	6450800	23577000						6717800			1	122.306	3.93382e-05	122.31	99.168	122.31	1	53.168	0.0244241	53.168	1	85.6194	0.00126755	85.619	1	86.3775	0.00117291	86.378	1	122.306	3.93382e-05	122.31
62	A0A2R8Y6G6	Alpha-enolase	ENO1							None	None	None	0	0	0													0.498375	0	1.71067e-20	101.73	91.732	101.73
63	A0A2R8Y6G6	Alpha-enolase	ENO1							None	None	None	0	0	0													0.498375	0	1.71067e-20	101.73	91.732	101.73
64	B4DGN8	cDNA FLJ53377, highly similar to Procollagen-lysine, 2-oxoglutarate 5-dioxygenase 1				4.7801	0.0308876			None	Up	None	2	1	2	107080000		21294000			87869000	314970000	298670000		64187000		306820000	1	70.9287	3.95247e-152	236.32	127.3	70.929	1	68.1321	0.00112611	144.77	1	107.563	0.0047145	107.56	1	126.313	0.000401773	126.31	1	236.315	3.95247e-152	236.32
65	B4DGN8	cDNA FLJ53377, highly similar to Procollagen-lysine, 2-oxoglutarate 5-dioxygenase 1				7.88496	0.182371			None	None	None	2	1	3	28885000		27407000		44355000		128250000	395440000	142100000	28146000		221930000	1	102.002	2.51678e-06	198.92	131.93	102	1	58.2299	0.0291288	58.23	1	198.919	2.51678e-06	198.92	1	150.399	0.00348704	150.4	1	180.926	0.0029372	180.93
66	E9PJT6	Solute carrier family 43 member 3 (Fragment)	SLC43A3							None	None	None	1	1	1		6567400		16937000				154880000					1	136.136	1.57262e-54	216.54	194.52	136.14					1	93.4784	0.00238605	93.478	1	58.4867	0.0220731	58.487	1	174.592	3.54098e-29	174.59
67	A0A024R599	Solute carrier family 3 (Activators of dibasic and neutral amino acid transport), member 2, isoform CRA_e	SLC3A2 hCG_2016598							KBD Unique	None	KBD Unique	0	2	0				38000000		18902000					28451000		1	62.9238	1.89529e-13	196.24	156.32	62.924													1	196.239	1.89529e-13	196.24
68	A0A024R599	Solute carrier family 3 (Activators of dibasic and neutral amino acid transport), member 2, isoform CRA_e	SLC3A2 hCG_2016598					0.17219	0.0213031	KBD Unique	OA Unique	Down	0	3	3				28299000	12540000	24881000	70812000	152470000	158390000		2.19067e+07	127224000	0.996053	24.0197	2.11157e-40	229.53	176.95	155													0.993284	21.6995	2.11157e-40	229.53
69	F5H5R4	Mas-related G-protein-coupled receptor member F	MRGPRF					0.151728	0.0876195	KBD Unique	OA Unique	None	0	3	3				160470000	35141000	20772000	311640000	822430000	292050000		7.21277e+07	4.75373e+08	1	221.816	2.15441e-191	308	293.79	234.39													1	250.947	1.55255e-109	272.32
70	E9PKA3	EGF-containing fibulin-like extracellular matrix protein 2 (Fragment)	EFEMP2	2.33066	0.352692					None	None	None	2	2	1		17042000	22044000	67056000		24040000		259790000		19543000	45548000		0.646159	2.61531	1.67935e-84	236.35	216.13	209.1					0.5	0	2.16782e-09	157.78	0.62733	2.26171	3.26943e-09	164.64	0.638877	2.47762	1.67935e-84	213.34
71	E9PKA3	EGF-containing fibulin-like extracellular matrix protein 2 (Fragment)	EFEMP2							None	None	None	1	0	1		17042000						259790000					0.5	0	1.67935e-84	236.35	216.13	236.35					0.5	0	2.16782e-09	157.78					0.5	0	1.67935e-84	204.5
72	H0YD65	Cathepsin F (Fragment)	CTSF	0.244792	0.0018265	2.55956	0.00482282	0.0956383	0.00104727	Down	Up	Down	3	3	2	145710000	106170000	130510000	21436000	29341000	42829000		297080000	355420000	1.27463e+08	31202000	326250000	1	153.672	0.00337595	158.03	138.55	158.03	1	142.981	0.00337595	147.34	1	153.222	0.00528762	157.58	1	153.672	0.00542129	158.03	1	116.265	0.00639388	120.62
73	H0YD65	Cathepsin F (Fragment)	CTSF							None	None	None	0	0	0													1	102.724	1.96832e-19	108.57	101.69	108.57
74	H0YD65	Cathepsin F (Fragment)	CTSF							None	None	None	3	1	1	33308000	26707000	31397000	22712000				70094000		3.04707e+07			1	255.152	4.87075e-255	332.53	284.69	332.53	1	195.869	2.88146e-100	263.57	1	206.862	1.56808e-100	266.93	1	222.664	1.34315e-156	294.01	1	207.997	2.10517e-156	291.5
75	A0A172Q3A8	Folate receptor (Fragment)								None	None	None	0	1	0						17000000							1	72.1498	0.00164958	95.981	90.702	95.981
76	A0A172Q3A8	Folate receptor (Fragment)								None	None	None	0	1	0				32434000									1	154.292	0.000329198	154.29	95.741	154.29													1	154.292	0.000329198	154.29
77	E9PQ34	Serpin H1 (Fragment)	SERPINH1	19.6331	0.00118253	26.1007	0.179802	0.752207	0.700019	Up	None	None	3	3	3	75179000	41811000	19523000	1089900000	840010000	750270000	464600000	2594200000	504290000	4.55043e+07	8.93393e+08	1.1877e+09	1	153.726	0.00301487	180.7	140.61	153.73	1	150.165	0.00347856	150.17	1	101.327	0.0183386	101.33	1	123.451	0.00532601	123.45	1	96.4916	0.00527217	174.52
78	A0A024R5S2	Cancer susceptibility candidate 4, isoform CRA_a	CASC4 hCG_2003796					0.0797434	0.213743	KBD Unique	OA Unique	None	0	2	3				20263000		10206000	65062000	356760000	151310000		15234500	191044000	0.995651	23.597	0.00667028	180.93	92.897	180.93													0.991691	20.7682	0.0214898	146.27
79	A0A024R5S2	Cancer susceptibility candidate 4, isoform CRA_a	CASC4 hCG_2003796							None	None	None	0	1	0				9388700									0.56307	1.10151	0.000723946	101.53	90.357	101.53													0.5	0	0.034165	44.567
80	A0AV88	ADAM10 protein	ADAM10							None	None	None	0	1	0				36876000									1	110.908	7.27155e-05	122.93	92.873	122.93													1	110.908	7.27155e-05	122.93
81	A0A024R6E0	SPARC related modular calcium binding 1, isoform CRA_b	SMOC1 hCG_21971	8.65345	0.132184	48.2947	0.0133923	0.17918	0.0241077	None	Up	Down	2	2	2		37559000	7692300	264290000	127290000			968500000	1216900000	22625650	195790000	1092700000	1	69.2664	0.0145071	166.34	60.051	166.34					0.999987	48.7774	0.0462516	164.89	1	69.2664	0.0460656	166.34	0.999988	49.1143	0.0462516	164.89
82	B2RBZ5	cDNA, FLJ95778, highly similar to Homo sapiens serpin peptidase inhibitor, clade A (alpha-1 antiproteinase, antitrypsin), member 10 (SERPINA10), mRNA								None	OA Unique	None	0	1	3				9910600			39502000	85637000	38239000			5.44593e+07	1	113.499	0.00975159	113.5	93.653	113.5													1	97.0933	0.0204285	97.093
83	A0A0G2JRN3	Alpha-1-antitrypsin	SERPINA1							None	None	None	1	0	1		29824000					58882000						0.998815	29.2568	3.18888e-47	160.48	150.2	157.08					0.891458	9.14502	3.18888e-47	160.48	0.998815	29.2568	3.27827e-46	157.08	0.977537	16.3866	8.45549e-27	137.88
84	A0A0G2JRN3	Alpha-1-antitrypsin	SERPINA1	1.26062	0.767309	11.862	0.0216955	0.106274	0.0258578	None	Up	Down	3	3	3	766520000	1686800000	989360000	3232100000	321770000	786030000	8500900000	20052000000	12284000000	1147560000	1.44663e+09	13612300000	1	249.752	1.33198e-85	254.18	220.22	249.75	1	123.019	1.19741e-59	241.51	1	200.206	6.11734e-23	200.21	1	208.513	2.79033e-29	208.51	1	254.181	1.33198e-85	254.18
85	P29622	Kallistatin (Kallikrein inhibitor) (Peptidase inhibitor 4) (PI-4) (Serpin A4)	SERPINA4 KST PI4							None	OA Unique	None	0	1	3						6584900	128090000	454030000	211950000			264690000	1	99.815	0.00425956	105.4	58.934	99.815	1	72.6431	0.033538	72.643
86	P29622	Kallistatin (Kallikrein inhibitor) (Peptidase inhibitor 4) (PI-4) (Serpin A4)	SERPINA4 KST PI4			25.8119	0.0203848			None	Up	None	3	1	3	6266100	37728000	7693000	88497000			282060000	665150000	386930000	1.7229e+07		4.44713e+08	1	103.686	2.91561e-06	181.68	151.12	103.69	1	101.954	0.00501662	101.95	1	81.3376	8.49921e-06	156.71	1	150.457	6.78065e-06	150.46	1	68.5357	2.91561e-06	181.68
87	P29622	Kallistatin (Kallikrein inhibitor) (Peptidase inhibitor 4) (PI-4) (Serpin A4)	SERPINA4 KST PI4							None	None	OA Unique	1	0	3		116750000					233290000	771330000	385650000			4.63423e+08	1	212.098	6.41626e-235	282.06	254.38	212.1					1	137.423	4.10901e-15	137.42					1	62.6114	0.00507218	62.611
88	Q86XZ8	CDC42BPB protein (Fragment)	CDC42BPB							None	None	None	0	1	0				6642100									0.945848	12.4221	0.019913	74.684	42.842	74.684													0.945848	12.4221	0.019913	74.684
89	B4DDH1	cDNA FLJ53503, highly similar to Plasma serine protease inhibitor						0.0638579	0.0895799	None	None	None	1	2	3	192700000				56862000	146040000	1172000000	1077900000	2516200000		101451000	1588700000	1	191.961	1.2562e-34	191.96	191.96	191.96	1	112.235	3.93278e-05	112.24	1	54.2806	0.0383287	54.281	1	42.3484	0.0308822	42.348	1	71.5274	0.000961803	71.527
90	A0A024R6P0	Serpin peptidase inhibitor, clade A (Alpha-1 antiproteinase, antitrypsin), member 3, isoform CRA_c	SERPINA3 hCG_2039549					0.07807	0.205411	None	None	None	1	2	3		337270000		128770000	78507000		467320000	2452100000	1063100000		103638500	1.32751e+09	1	421.058	0	421.06	393.09	421.06					1	58.8484	1.62286e-158	239.72	1	242.338	7.45298e-182	242.34	1	207.125	2.95483e-46	207.13
91	A0A024R6P0	Serpin peptidase inhibitor, clade A (Alpha-1 antiproteinase, antitrypsin), member 3, isoform CRA_c	SERPINA3 hCG_2039549							None	CK Unique	None	2	1	0	9535300	31589000		38083000						20562150			1	181.096	1.86176e-60	216.83	195.06	216.83	1	113.473	5.05035e-14	133.48	1	186.893	1.4556e-46	213.99					1	181.096	1.51923e-54	216.83
92	A0A024R6P0	Serpin peptidase inhibitor, clade A (Alpha-1 antiproteinase, antitrypsin), member 3, isoform CRA_c	SERPINA3 hCG_2039549	0.565444	0.543218	9.18329	0.125289	0.0615731	0.113349	None	None	None	2	2	3		547840000	274850000	437440000		27745000	1622200000	5892300000	3818000000	411345000	232592500	3777500000	1	266.75	1.261e-179	305.67	290.8	266.75					1	305.674	1.261e-179	305.67	1	259.095	4.67962e-86	259.1	1	78.1568	0.00378959	78.157
93	A0A088QF11	Choline transporter-like protein 2 isoform 2	SLC44A2	2.02283	0.0365283	16.129	0.263175	0.125415	0.290303	Up	None	None	2	2	3	41093000	50245000		100340000		84421000	402860000	1513200000	293730000	45669000	92380500	7.36597e+08	1	137.439	9.47254e-80	193.15	179.56	137.44	1	107.339	8.21975e-07	107.34	1	43.7941	1.11444e-06	114.96					1	63.4596	9.74162e-11	137.44
94	A0A088QF11	Choline transporter-like protein 2 isoform 2	SLC44A2	4.17874	0.147677	15.8459	0.0367928	0.263711	0.0849377	None	Up	None	3	3	3	52905000	97367000	51464000	377060000	45612000	420330000	814250000	1707300000	675140000	6.72453e+07	2.81001e+08	1.06556e+09	1	104.297	4.9398e-80	261.58	177.09	104.3	1	213.346	1.20963e-17	213.35	1	95.1622	2.12544e-34	231.42	1	163.898	5.64666e-30	197.94	1	84.6051	2.94981e-58	251.43
95	A0A088QF11	Choline transporter-like protein 2 isoform 2	SLC44A2	1.0411	0.931537	8.31224	0.0105781	0.125249	0.0106398	None	Up	Down	3	3	3	38278000	159340000	138680000	184210000	81118000	84791000	1038300000	1171000000	586090000	1.12099e+08	1.16706e+08	9.31797e+08	1	192.18	2.18472e-66	252.21	210.21	234.92	1	122.84	3.45827e-09	165.58	1	149.946	9.99899e-13	190.66	1	209.467	2.18472e-66	252.21	1	175.53	1.22811e-17	204.49
96	K7EKF6	Angiopoietin-related protein 6	ANGPTL6							CK Unique	None	None	2	0	1		11116000	7941900				30156000			9528950			1	69.0301	0.00140176	107.97	89.632	69.03					1	107.966	0.00140176	107.97	1	105.252	0.00183055	105.25
97	K7EKF6	Angiopoietin-related protein 6	ANGPTL6							None	OA Unique	OA Unique	0	0	2							46977000		68359000			57668000	1	148.144	0.000910321	148.14	100.4	148.14
98	A0A024R7B2	Endothelial differentiation, sphingolipid G-protein-coupled receptor, 5, isoform CRA_a	EDG5 hCG_28477							None	OA Unique	OA Unique	0	0	3							20865000	30912000	28027000			2.66013e+07	1	70.9287	0.00318516	119.53	72.447	70.929									1	91.0872	0.0204224	91.087	1	119.528	0.00318516	119.53
99	B4E0Z6	cDNA FLJ59809, highly similar to Bone marrow stromal antigen 2								None	None	None	0	0	0													1	94.4606	0.000557394	94.461	76.048	94.461													1	94.4606	0.000557394	94.461
100	B4DPP4	cDNA FLJ56646, highly similar to Transmembrane emp24 domain-containing protein 9		4.0274	0.0390848					Up	CK Unique	KBD Unique	3	2	0	18697000	35370000	10649000	108390000	65368000					21572000	86879000		1	143.154	5.27942e-35	192.25	179.21	143.15	1	170.526	9.50978e-30	170.53	1	74.0475	0.00342859	74.047	1	97.4885	0.001367	97.488	1	60.8261	5.27942e-35	192.25
101	A0A024R7N5	Kelch-like 26 (Drosophila), isoform CRA_a	KLHL26 hCG_37049							CK Unique	None	None	2	0	1		1699600000	1336300000						280260000	1517950000			1	69.5982	0.011488	91.041	32.437	69.598					1	57.5984	0.0260793	57.598	1	67.9926	0.0161591	69.954	1	57.5984	0.0260582	57.598
102	A0A024R7W0	Inositol monophosphatase domain containing 1, isoform CRA_a	IMPAD1 hCG_40999							None	None	None	1	1	1			7223800	47896000				559800000					1	218.398	6.31102e-170	287.54	252.79	218.4	1	63.7088	0.0088235	63.709					1	90.3339	5.27101e-39	174.83	1	287.539	6.31102e-170	287.54
103	Q7Z2W2	Extracellular sulfatase (EC 3.1.6.-)	DKFZp686F13142							None	None	None	0	1	0				8925200									0.999717	35.4771	3.51693e-14	166.04	151.16	166.04													0.999717	35.4771	3.51693e-14	166.04
104	Q7Z2W2	Extracellular sulfatase (EC 3.1.6.-)	DKFZp686F13142							None	CK Unique	None	2	1	0	8670700		10570000	18962000						9620350			1	138.242	2.34398e-11	145.04	125.57	138.24	1	83.2061	0.0284067	83.206					1	89.0462	0.0234368	89.046	1	139.28	0.00333487	139.28
105	Q7Z2W2	Extracellular sulfatase (EC 3.1.6.-)	DKFZp686F13142							None	None	None	0	0	1								148340000					0.999924	41.5602	0.00466748	68.88	54.267	68.88
106	Q7Z2W2	Extracellular sulfatase (EC 3.1.6.-)	DKFZp686F13142			10.1032	0.0183108			None	Up	None	3	1	3	12031000	10713000	7006800	15410000			63834000	143900000	92845000	9.91693e+06		100193000	0.986232	18.5512	8.2275e-13	200.71	174.27	200.71	0.840908	7.23101	0.000280411	123.75	0.86451	8.04863	0.000195249	125.75	0.904884	9.78341	0.0287681	73.067	0.868043	8.1811	6.69024e-06	150.61
107	Q7Z2W2	Extracellular sulfatase (EC 3.1.6.-)	DKFZp686F13142							None	None	None	0	1	0				7424200									0.999958	43.7771	3.37727e-05	126.19	102.97	126.19													0.999958	43.7771	3.37727e-05	126.19
108	A0A024R816	Protein tweety homolog	TTYH3 hCG_18437							None	None	None	0	1	0				27426000									1	80.3031	0.00220775	80.303	66.572	80.303													1	80.3031	0.00220775	80.303
109	Q13219	Pappalysin-1 (EC 3.4.24.79) (Insulin-like growth factor-dependent IGF-binding protein 4 protease) (IGF-dependent IGFBP-4 protease) (IGFBP-4ase) (Pregnancy-associated plasma protein A) (PAPP-A)	PAPPA							None	None	None	0	1	0				6429400									0.999898	39.9253	1.62165e-05	85.537	83.483	85.537													0.999898	39.9253	1.62165e-05	85.537
110	Q13219	Pappalysin-1 (EC 3.4.24.79) (Insulin-like growth factor-dependent IGF-binding protein 4 protease) (IGF-dependent IGFBP-4 protease) (IGFBP-4ase) (Pregnancy-associated plasma protein A) (PAPP-A)	PAPPA							None	None	None	0	1	0				6753800									0.999509	33.0842	0.0137047	52.483	52.471	52.483													0.999509	33.0842	0.0137047	52.483
111	Q53FU0	Carbohydrate sulfotransferase (EC 2.8.2.-) (Fragment)								CK Unique	CK Unique	None	2	0	0	7192800		8484300							7838550			1	80.9039	0.000169181	118.52	102.58	118.52	0.987539	18.9902	0.0390392	44.968					1	80.9039	0.000169181	118.52
112	Q53FU0	Carbohydrate sulfotransferase (EC 2.8.2.-) (Fragment)		0.237109	0.00760565					Down	None	None	3	3	1	40066000	69194000	60717000	11941000	14307000	14055000		463150000		56659000	1.34343e+07		1	151.735	2.03573e-23	151.99	135.05	151.74	1	119.867	0.000274564	119.87	1	142.851	5.63463e-09	142.85	1	142.851	5.63463e-09	142.85	1	126.948	7.24077e-05	126.95
113	Q9UKU9	Angiopoietin-related protein 2 (Angiopoietin-like protein 2)	ANGPTL2 ARP2 UNQ170/PRO196	0.219252	0.0107659	7.38166	0.0119841	0.0297022	0.00793146	Down	Up	Down	3	3	3	848570000	1448300000	1264700000	457790000	104850000	218240000	11953000000	6028600000	8308700000	1187190000	2.60293e+08	8.76343e+09	1	59.7055	3.3748e-169	300.78	247.03	59.705	1	218.012	1.98454e-65	249.2	1	286.186	2.41707e-128	286.19	1	174.681	5.97637e-110	273.04	1	300.782	3.3748e-169	300.78
114	Q9UKU9	Angiopoietin-related protein 2 (Angiopoietin-like protein 2)	ANGPTL2 ARP2 UNQ170/PRO196	0.262893	0.00473373	2.37032	0.0355567	0.11091	0.00791314	Down	Up	Down	3	3	3	421270000	414400000	288400000	98411000	59949000	137150000	725690000	732920000	1205800000	374690000	9.85033e+07	8.88137e+08	1	133.759	5.36053e-295	332.63	317.35	133.76	1	46.5581	6.26885e-78	232.87	1	108.405	7.23174e-103	247.34	1	277.068	3.88553e-151	277.07	1	115.837	1.77532e-294	326.87
115	X6RH99	Alpha-N-acetylgalactosaminide alpha-2,6-sialyltransferase 6 (Fragment)	ST6GALNAC6							CK Unique	CK Unique	None	2	0	0		16708000	10140000							13424000			1	80.1654	0.0233238	89.355	46.108	80.165					1	89.3546	0.0233238	89.355	1	80.1654	0.0315421	80.165
116	Q59EE7	Pro-alpha-1 type V collagen variant (Fragment)								None	OA Unique	None	0	1	3				18056000			66089000	66075000	28094000			5.34193e+07	1	99.8021	0.00278786	141.1	101.03	99.802													1	99.1355	0.00773142	141.1
117	Q59EE7	Pro-alpha-1 type V collagen variant (Fragment)								None	None	None	0	1	0				31090000									1	58.0713	3.10251e-25	194.12	163.57	58.071													1	194.124	3.10251e-25	194.12
118	A0A024R8G3	Prostaglandin D2 synthase 21kDa (Brain), isoform CRA_a (Testis tissue sperm-binding protein Li 63n)	PTGDS hCG_1780827					0.0796731	0.00382456	None	None	Down	1	3	3		60637000		239640000	56241000	84343000	2062400000	1331100000	1378800000		1.26741e+08	1.59077e+09	1	228.381	3.15921e-90	247.3	222.61	228.38					1	182.572	1.62283e-30	182.57					1	247.303	3.15921e-90	247.3
119	A0A024R8G3	Prostaglandin D2 synthase 21kDa (Brain), isoform CRA_a (Testis tissue sperm-binding protein Li 63n)	PTGDS hCG_1780827	3.63796	0.438943					None	None	None	2	2	1	27392000	30864000		186110000		25823000		383160000		29128000	105966500		1	173.072	3.41519e-23	206.97	179.67	173.07	1	144.698	2.59109e-09	144.7	1	89.2829	0.00376041	89.283					1	206.97	3.41519e-23	206.97
120	A0A024R8Q1	Glucosidase, alpha acid (Pompe disease, glycogen storage disease type II), isoform CRA_a	GAA hCG_27920							None	None	None	1	1	0			34611000	129530000									1	244.446	1.99689e-71	244.45	216.46	244.45									1	162.925	1.15669e-13	162.93	1	244.446	1.99689e-71	244.45
121	A0A024R8Q1	Glucosidase, alpha acid (Pompe disease, glycogen storage disease type II), isoform CRA_a	GAA hCG_27920							None	None	None	1	1	3	19172000			24438000			86824000	200130000	91829000			126261000	1	188.4	6.66584e-127	278.36	232.99	188.4	1	101.203	0.00121041	101.2									1	188.4	8.29675e-25	188.4
122	A0A024R8Q1	Glucosidase, alpha acid (Pompe disease, glycogen storage disease type II), isoform CRA_a	GAA hCG_27920							None	None	None	0	1	0				5842100									0.5	0	0.0079467	102.07	42.822	102.07													0.5	0	0.00838291	102.07
123	A0A024R8Q1	Glucosidase, alpha acid (Pompe disease, glycogen storage disease type II), isoform CRA_a	GAA hCG_27920							None	None	None	0	1	0				5842100									0.5	0	0.0079467	102.07	42.822	102.07													0.5	0	0.00838291	102.07
124	A0A024R8Q1	Glucosidase, alpha acid (Pompe disease, glycogen storage disease type II), isoform CRA_a	GAA hCG_27920							None	None	None	0	0	0													1	80.9842	8.42674e-10	80.984	75.143	80.984
125	A0A024R8Q1	Glucosidase, alpha acid (Pompe disease, glycogen storage disease type II), isoform CRA_a	GAA hCG_27920							None	None	None	0	0	0													1	80.9842	8.42674e-10	80.984	75.143	80.984
126	F8WFC4	Myelin protein zero-like protein 1	MPZL1					0.151867	0.0113002	None	None	Down	1	3	3		14823000		61403000	62517000	71787000	435530000	568360000	284780000		6.52357e+07	4.29557e+08	1	173.371	2.68704e-12	200.6	88.432	173.37					1	134.658	3.35902e-05	134.66					1	193.825	2.36251e-08	193.82
127	B4DTH4	cDNA FLJ51304, highly similar to Angiopoietin-related protein 1								None	OA Unique	None	0	1	2				4529400			42975000	62725000				52850000	1	100.756	0.000310143	124.74	64.153	100.76													1	65.3052	0.0450037	65.305
128	A0A024R930	Proteoglycan 4, isoform CRA_a	PRG4 hCG_41181	1.24888	0.538819	3.84829	0.00066699	0.324528	0.000645955	None	Up	Down	3	3	3	58041000	52913000	19587000	63663000	32958000	66409000	164560000	161070000	176730000	4.35137e+07	5.43433e+07	1.67453e+08	1	138.549	0.00326844	165.52	113.95	138.55	1	151.292	0.00351945	151.29	1	157.579	0.00528762	157.58	1	153.726	0.00414264	153.73	1	165.518	0.005309	165.52
129	A0A024R931	alpha-1,2-Mannosidase (EC 3.2.1.-)	C1orf22 hCG_2025041							None	None	None	0	0	0													1	100.554	0.00111618	100.55	85.863	100.55													1	100.554	0.00111618	100.55
130	A0A0K0Q2Z1	Serpin peptidase inhibitor clade C member 1	SERPINC1	1.80461	0.483723	30.5861	0.0308421	0.059001	0.0341756	None	Up	Down	3	3	3	45107000	88503000	50647000	234620000	32343000	65549000	1056700000	2937800000	1641200000	61419000	1.10837e+08	1.87857e+09	1	219.892	0	426.89	363.46	219.89	1	171.734	3.33541e-14	171.73	1	426.886	0	426.89	1	345.146	0	345.15	1	153.809	0	423.63
131	A0A0K0Q2Z1	Serpin peptidase inhibitor clade C member 1	SERPINC1			11.1656	0.136137			None	None	None	2	1	3	40184000	87665000		132600000			258040000	1112600000	770630000	63924500		7.13757e+08	1	195.773	0	358.91	321.77	195.77	1	292.218	1.24131e-177	292.22	1	308.579	6.11724e-225	308.58					1	358.914	0	358.91
132	A0A024R957	Torsin A interacting protein 2, isoform CRA_b	TOR1AIP2 hCG_2039855							None	None	None	0	1	0				6877400									0.998944	29.7571	1.07585e-07	102.89	92.079	102.89													0.94141	12.0595	0.00740744	64.249
133	A0A024R962	HCG40889, isoform CRA_b	hCG_40889	3.19589	0.18978	18.3266	0.0969434	0.174386	0.0566235	None	None	None	2	3	3		189150000	65558000	638430000	218120000	364480000	1371700000	3731100000	1899100000	127354000	407010000	2.33397e+09	1	114.4	1.4275e-22	182.31	161.58	114.4					1	111.77	2.39216e-05	111.77	1	126.097	1.40627e-12	126.1	1	133.781	1.67764e-10	133.78
134	A0A024R962	HCG40889, isoform CRA_b	hCG_40889			32.1831	0.205163			None	None	None	2	1	3		5591900	6443700	31185000			80784000	371800000	128430000	6017800		1.93671e+08	1	173.236	1.62048e-23	215.06	208.53	173.24					1	116.233	0.0010846	116.23	1	125.74	0.000222237	125.74	1	175.905	1.47705e-22	208.33
135	A0A024R962	HCG40889, isoform CRA_b	hCG_40889							None	OA Unique	None	0	1	3				255520000			541160000	1052900000	454780000			6.82947e+08	1	145.985	1.62162e-109	275.84	223.58	275.84													1	124.226	2.91413e-52	241.92
136	A0A024R962	HCG40889, isoform CRA_b	hCG_40889							None	None	None	0	0	0													1	115.412	0.000481485	115.41	81.159	115.41													1	115.412	0.000481485	115.41
137	A0A024R962	HCG40889, isoform CRA_b	hCG_40889							None	None	None	0	0	0													1	167.374	3.33647e-65	167.37	161.11	167.37													1	167.374	3.33647e-65	167.37
138	A0A024R962	HCG40889, isoform CRA_b	hCG_40889							None	None	None	0	0	0													1	167.374	3.33647e-65	167.37	161.11	167.37													1	167.374	3.33647e-65	167.37
139	A0A024R962	HCG40889, isoform CRA_b	hCG_40889							None	None	None	0	1	1				21399000			67283000						1	89.8692	1.73075e-14	109.09	103.22	109.09					0.999999	61.1819	1.33864e-09	70.268					1	89.8692	1.73075e-14	109.09
140	A0A024R962	HCG40889, isoform CRA_b	hCG_40889							None	None	None	0	0	0													0.534947	0.786275	1.33864e-09	70.268	65.824	70.268					0.534947	0.786275	1.33864e-09	70.268
141	A0A024R962	HCG40889, isoform CRA_b	hCG_40889							None	None	None	0	1	1				21399000			67283000						0.765034	6.27799	1.73075e-14	109.09	103.22	45.361													0.754678	5.59473	1.73075e-14	109.09
142	A0A3B3IRN5	Fibromodulin	FMOD							None	None	None	0	0	0													1	119.266	5.74844e-16	128.06	102.74	128.06					1	119.266	5.74844e-16	128.06
143	A0A3B3IRN5	Fibromodulin	FMOD							None	None	None	0	1	0					93105000								0.505467	1.85591	1.16599e-06	67.14	57.596	67.14
144	A0A3B3IRN5	Fibromodulin	FMOD					0.129813	0.025557	KBD Unique	OA Unique	Down	0	2	2				27389000	181940000			890580000	721960000		104664500	806270000	0.974759	18.5423	3.85936e-40	148.22	137.94	43.903	0.974759	18.5423	1.0003e-11	93.295									0.545475	0.949481	3.85936e-40	148.22
145	A0A3B3IRN5	Fibromodulin	FMOD	0.484299	0.0325599					Down	None	None	2	3	1	2843400000		3102200000	1310100000	2021800000	987270000			335640000	2972800000	1.43972e+09		0.974759	18.5423	8.2783e-57	148.22	137.94	43.903	0.974759	18.5423	8.2783e-57	137.44	0.686071	6.22308	2.43901e-54	135.7	0.59209	0	1.95226e-25	110.25	0.581151	3.30082	1.61456e-45	148.22
146	A0A3B3IRN5	Fibromodulin	FMOD	0.250266	0.00330812					Down	None	None	2	3	1	2843400000		3390400000	515290000	837600000	987270000			335640000	3116900000	7.80053e+08		0.997287	27.4817	4.08904e-64	150.4	140.43	126.8	0.98822	20.4252	8.2783e-57	137.44					0.59209	0	9.21879e-36	119.64	0.771716	6.06025	1.61456e-45	148.22
147	A0A3B3IRN5	Fibromodulin	FMOD	0.504337	0.0314882	0.698901	0.217239	0.721614	0.306578	None	None	None	3	3	2	2843400000	4338300000	3390400000	1420700000	2404100000	1507100000		1949700000	2976200000	3.52403e+09	1777300000	2462950000	1	64.0355	0	346.64	336.25	247.52	0.997337	27.6915	4.87306e-74	153.41	0.999999	61.4437	0	346.64	0.999838	37.8918	8.63148e-101	212.78	0.918665	10.0618	4.32632e-55	148.22
148	A0A3B3IRN5	Fibromodulin	FMOD							None	None	None	0	0	1									721960000				0.976467	16.0759	1.4352e-13	79.782	68.655	79.782	0.976467	16.0759	1.4352e-13	79.782
149	A0A3B3IRN5	Fibromodulin	FMOD					70.829	0.173454	KBD Unique	OA Unique	None	0	2	2					96735000	271590000		2293800	2906400		184162500	2600100	1	50.0335	0.00357195	110.76	80.947	50.034	0.5	0	0.00357195	110.76					0.5	0	0.0325389	51.445	0.5	0	0.035579	75.378
150	A0A3B3IRN5	Fibromodulin	FMOD	0.957503	0.734206	2.22174	0.000464571	0.43097	0.000291226	None	Up	Down	3	3	3	54553000000	58755000000	43245000000	44265000000	48068000000	57567000000	117150000000	122050000000	108620000000	5.21843e+10	4.99667e+10	115940000000	1	50.0335	7.72146e-185	285.74	224.98	50.034	0.999961	44.0947	2.71889e-79	228.05	0.999926	41.3252	1.11934e-101	244.61	0.999804	37.0799	3.04464e-17	204.07	0.997898	26.7653	1.08667e-22	223.32
151	A0A3B3IRN5	Fibromodulin	FMOD							None	None	None	0	0	1								494480000					0.933278	10.0504	2.14369e-65	176.97	164.76	41.83	0.933278	10.0504	3.09834e-31	116.35	0.891793	9.16	8.2464e-37	129.73					0.862154	7.9662	2.36121e-10	85.489
152	A0A3B3IRN5	Fibromodulin	FMOD							None	None	None	0	0	1							8330700000						0.880555	8.67588	1.69464e-49	143.35	123.09	143.35	0.79295	5.13237	3.09834e-31	116.35
153	A0A3B3IRN5	Fibromodulin	FMOD	0.255241	0.347164	0.0716582	0.137356	3.56193	0.423161	None	None	None	3	2	3	84011000000	80555000000	248350000	27803000000	241950000		9598700000	975800000	1235800000	5.49381e+10	14022475000	3.93677e+09	1	165.133	0	392.37	372.49	369.38	1	169.539	0	386.25	1	156.361	0	381.53	1	154.19	0	392.37	1	165.133	0	369.38
154	A0A3B3IRN5	Fibromodulin	FMOD							None	None	None	0	0	0													0.948782	11.1989	0.0101502	41.83	25.942	41.83	0.948782	11.1989	0.0101502	41.83
155	A0A3B3IRN5	Fibromodulin	FMOD							None	None	None	0	0	1								8412300					0.892681	9.20022	6.31938e-128	186.23	174.59	186.23
156	A0A3B3IRN5	Fibromodulin	FMOD							None	None	None	0	0	1								8412300					0.506495	0	4.6693e-18	78.228	69.315	62.105
157	A0A3B3IRN5	Fibromodulin	FMOD			0.0108335	0.289504			CK Unique	None	OA Unique	3	0	2	596220000	212060000	2121000000				12744000	8412300		9.76427e+08		10578150	1	97.7209	3.30088e-243	297.87	290.08	297.87	1	97.7209	3.30088e-243	297.87	1	94.09	2.80142e-136	236.73	1	95.3856	4.57837e-95	205.09
158	A0A3B3IRN5	Fibromodulin	FMOD							None	None	None	1	0	0			105220000										0.968081	16.9386	7.30952e-05	45.47	38.55	45.47									0.968081	16.9386	7.30952e-05	45.47
159	A0A024R972	Laminin, gamma 1 (Formerly LAMB2), isoform CRA_a	LAMC1 hCG_40729							None	OA Unique	None	0	1	2				21357000			149780000	299770000				224775000	1	101.452	2.4272e-138	296.78	278.04	280.55													1	74.7158	1.77699e-86	267.63
160	A0A024R972	Laminin, gamma 1 (Formerly LAMB2), isoform CRA_a	LAMC1 hCG_40729					0.209074	0.199687	KBD Unique	OA Unique	None	0	2	3				91334000	6617100		200500000	393760000	108490000		48975550	234250000	1	135.415	1.12718e-44	234.24	183.17	233.46													1	87.7285	1.53798e-09	176.78
161	A0A024R972	Laminin, gamma 1 (Formerly LAMB2), isoform CRA_a	LAMC1 hCG_40729					0.151935	0.149926	KBD Unique	OA Unique	None	0	2	3				45024000	36145000		182660000	449210000	169480000		40584500	2.67117e+08	0.998988	29.942	0.00191118	150.4	63.533	150.4													0.984867	18.1345	0.00242985	145.16
162	A0A024R972	Laminin, gamma 1 (Formerly LAMB2), isoform CRA_a	LAMC1 hCG_40729							None	None	None	0	1	0				24736000									1	144.103	2.68513e-09	144.1	102.1	144.1													1	144.103	2.68513e-09	144.1
163	A0A024R972	Laminin, gamma 1 (Formerly LAMB2), isoform CRA_a	LAMC1 hCG_40729					0.079487	0.245581	KBD Unique	OA Unique	None	0	2	3				130250000		36944000	788490000	2055000000	311630000		83597000	1.05171e+09	1	202.133	2.58056e-179	306.55	275.66	249.69													1	249.203	2.58056e-179	306.55
164	A0A024R972	Laminin, gamma 1 (Formerly LAMB2), isoform CRA_a	LAMC1 hCG_40729			11.3357	0.000530864			None	Up	None	3	1	2	158680000	159930000	55049000	394090000			1322300000		1501500000	124553000		1411900000	1	251.298	0	390.16	343.21	366.19	0.999961	44.0883	0.0460799	53.6	1	83.0199	2.12522e-07	126.56	1	128.964	5.59592e-30	202.4	1	255.608	0	360.04
165	A0A024R972	Laminin, gamma 1 (Formerly LAMB2), isoform CRA_a	LAMC1 hCG_40729					0.200967	0.183949	KBD Unique	OA Unique	None	0	3	3				218650000	322920000	112880000	524140000	2159700000	572660000		218150000	1085500000	0.999999	62.6665	1.10221e-25	218.47	189.32	205.09													0.999999	60.8029	1.10221e-25	218.47
166	E5RJA8	Carboxypeptidase Q (Fragment)	CPQ							CK Unique	CK Unique	None	2	0	0	37215000	32550000								34882500			1	103.497	1.22876e-16	201.75	146.18	201.75	1	103.497	1.22876e-16	201.75	1	82.7304	1.20025e-08	161.67	1	64.6653	2.27105e-16	150.04
167	B4DFW1	cDNA FLJ52457, highly similar to Protein NOV homolog								None	None	None	0	1	0						6774700							1	66.2625	0.0215835	66.262	57.068	66.262
173	H7C0X5	Probable serine carboxypeptidase CPVL (Fragment)	CPVL							None	None	None	0	1	0				16746000									1	84.7216	1.55795e-07	123.14	106.61	123.14													1	84.7216	1.55795e-07	123.14
174	B4DLL8	cDNA FLJ59335, highly similar to Transmembrane glycoprotein NMB								None	None	None	0	0	0													0.998825	29.2953	8.5045e-09	138.89	97.19	138.89
175	B4DLL8	cDNA FLJ59335, highly similar to Transmembrane glycoprotein NMB								None	None	None	0	1	0				130430000									1	63.3036	4.9574e-78	240.2	219.77	240.2													1	63.3036	4.9574e-78	240.2
176	B4DRK1	cDNA FLJ50841, highly similar to Zinc finger protein GLI3								None	OA Unique	OA Unique	0	0	2							35171000		188920000			112045500	1	44.807	0.0167156	68.536	14.969	44.807
177	B4DRK1	cDNA FLJ50841, highly similar to Zinc finger protein GLI3								None	OA Unique	OA Unique	0	0	2							35171000		188920000			112045500	1	44.807	0.0167156	68.536	14.969	44.807
178	A0A024RAB6	Heparan sulfate proteoglycan 2 (Perlecan), isoform CRA_b	HSPG2 hCG_1981506	1.30049	0.650485	3.2153	0.498602	0.40447	0.55988	None	None	None	2	2	2	110920000		113490000	209820000		82024000	664070000	57476000		112205000	145922000	360773000	1	68.6393	7.63429e-106	260.53	257.12	68.639	1	247.289	6.10041e-91	247.29	1	254.841	9.79242e-105	254.84	1	247.31	2.67162e-91	247.31	1	114.691	7.63429e-106	260.53
179	A0A024RAB6	Heparan sulfate proteoglycan 2 (Perlecan), isoform CRA_b	HSPG2 hCG_1981506	2.34232	0.0685738					None	None	None	2	2	1	27240000	50022000		99175000		81797000		1230400000		38631000	90486000		1	98.4179	0.00961312	139.92	65.501	98.418	1	76.0346	0.0365856	138.48	1	79.1455	0.0233355	79.146					1	131.037	0.0109057	131.04
180	A0A024RAB6	Heparan sulfate proteoglycan 2 (Perlecan), isoform CRA_b	HSPG2 hCG_1981506	1.30629	0.629511	6.93538	0.0248579	0.188352	0.0342074	None	Up	Down	3	3	3	376850000	282990000	227840000	699090000	122400000	338080000	1090300000	2767800000	2298300000	2.95893e+08	3.86523e+08	2.05213e+09	1	157.119	1.29391e-148	247.36	227.85	157.12	1	119.113	1.29391e-148	247.36	1	109.271	1.29801e-77	175.48	1	212.217	2.52904e-101	212.22	1	191.99	2.46904e-87	191.99
181	A0A024RAB6	Heparan sulfate proteoglycan 2 (Perlecan), isoform CRA_b	HSPG2 hCG_1981506	0.43093	0.141834	3.10038	0.00651094	0.138992	0.00488198	None	Up	Down	2	2	3	174950000		162490000	112840000		32573000	442650000	563690000	562950000	168720000	72706500	5.23097e+08	1	178.53	7.94747e-103	240.75	208.05	178.53	1	136.436	1.10259e-21	136.44	1	146.501	2.58054e-30	146.5	1	189.09	7.76671e-57	189.09	1	227.512	7.59998e-90	227.51
182	A0A024RAB6	Heparan sulfate proteoglycan 2 (Perlecan), isoform CRA_b	HSPG2 hCG_1981506							None	None	None	0	1	1						13179000	202730000						1	147.096	5.37264e-12	147.1	142.63	147.1
183	A0A024RAB6	Heparan sulfate proteoglycan 2 (Perlecan), isoform CRA_b	HSPG2 hCG_1981506					1.55143	0.687024	None	None	None	1	3	2		15533000		468950000	168860000	16852000	96276000	185040000			2.18221e+08	140658000	1	96.5565	0.000841913	128.36	112.73	123.86					1	66.8581	0.00785695	96.331	1	84.4521	0.0130712	103.55	1	79.2867	0.00308405	111.61
184	A0A024RAB6	Heparan sulfate proteoglycan 2 (Perlecan), isoform CRA_b	HSPG2 hCG_1981506	1.52437	0.59307	10.9732	0.00169029	0.138918	0.00416241	None	Up	Down	3	3	3	376870000	339620000	296700000	1119800000	151710000	272970000	3175200000	4597500000	3345200000	337730000	5.14827e+08	3.70597e+09	1	140.123	0	416.3	345.74	140.12	1	300.332	9.59764e-214	300.33	1	263.588	4.52792e-132	263.59	1	311.807	1.03704e-238	311.81	1	343.239	0	343.24
185	B7Z1D1	Alkaline phosphatase (EC 3.1.3.1)						0.219037	0.0455359	KBD Unique	OA Unique	Down	0	3	3				238620000	118380000	113790000	613960000	1085900000	449500000		156930000	7.16453e+08	1	222.39	3.51737e-269	340.93	320.79	293.94													1	216.397	1.30715e-147	290.18
186	B7Z1D1	Alkaline phosphatase (EC 3.1.3.1)								KBD Unique	None	None	0	3	1				115910000	85471000	70721000		791250000			9.07007e+07		1	189.758	3.0917e-242	275.5	252.05	275.5													1	164.563	2.73638e-66	221.25
187	B7Z1D1	Alkaline phosphatase (EC 3.1.3.1)								None	None	None	0	0	0													0.869126	8.22217	2.31805e-10	93.572	76.424	93.572
188	B7Z1D1	Alkaline phosphatase (EC 3.1.3.1)								None	OA Unique	None	0	1	3				37589000			28867000	144230000	64868000			7.93217e+07	1	101.719	1.38244e-202	319.46	266.13	101.72													1	116.546	0.00530243	116.55
189	X6RLJ0	Complement C1q subcomponent subunit A (Fragment)	C1QA							None	None	None	0	0	0													0.961001	15.4241	8.49277e-19	98.627	87.21	98.627
190	X6RLJ0	Complement C1q subcomponent subunit A (Fragment)	C1QA	6.07626	0.374119	28.4945	0.014368	0.213243	0.0550931	None	Up	None	3	3	3	314910000	205210000	233710000	4078300000	235140000	267030000	10492000000	5640800000	5347200000	2.51277e+08	1.52682e+09	7160000000	1	98.0937	0	390.81	359.49	223.09	1	78.4547	2.27228e-63	199.3	1	69.1326	2.66301e-91	230.77	0.999998	56.6602	5.40948e-91	227.19	1	72.7893	1.03972e-206	295.19
191	A0A024RAK9	Hyaluronan and proteoglycan link protein 1, isoform CRA_a	HAPLN1 hCG_39210							None	None	None	0	0	1							23581000						1	58.29	3.07724e-07	92.939	78.378	58.29									1	56.9005	3.07724e-07	92.939
192	A0A024RAK9	Hyaluronan and proteoglycan link protein 1, isoform CRA_a	HAPLN1 hCG_39210	0.58961	0.0591457	1.52815	0.0200518	0.385833	0.000682459	None	None	Down	3	3	3	73936000000	91663000000	116730000000	39559000000	64892000000	62013000000	140800000000	137600000000	153040000000	9.41097e+10	55488000000	1.43813e+11	1	108.667	0.00126874	163.32	124.51	108.67	1	123.883	0.00126874	138.54	1	63.7269	0.00184428	133.23	1	108.667	0.00223488	138.54	1	163.319	0.00387927	163.32
193	A0A024RAK9	Hyaluronan and proteoglycan link protein 1, isoform CRA_a	HAPLN1 hCG_39210							None	None	None	0	0	0													0.517904	0.311153	3.57212e-05	61.101	51.131	61.101	0.5	0	0.00153282	52.402	0.517904	0.311153	3.57212e-05	61.101	0.5	0	0.00726241	44.05
194	A0A024RAK9	Hyaluronan and proteoglycan link protein 1, isoform CRA_a	HAPLN1 hCG_39210							None	None	None	0	0	0													0.5	0	0.00153282	52.402	46.972	44.05	0.5	0	0.00153282	52.402					0.5	0	0.00726241	44.05
195	D6RGZ6	Versican core protein (Fragment)	VCAN	1.29037	0.623126	19.2271	0.00700526	0.0671121	0.00762395	None	Up	Down	3	3	3	95233000	181650000	216810000	363190000	79858000	194000000	2899400000	2304900000	4288000000	1.64564e+08	2.12349e+08	3164100000	1	246.26	1.96326e-117	267.75	230.56	246.26	1	199.432	1.80071e-16	199.43	1	98.9017	4.76483e-93	267.75	1	69.7206	1.07993e-40	231.83	1	227.311	3.10792e-40	227.31
196	D6RGZ6	Versican core protein (Fragment)	VCAN			80.0809	0.00406018			None	Up	None	2	1	3		15914000	17543000	93983000			1095500000	1527900000	1395500000	16728500		1.33963e+09	1	155.733	1.53967e-102	237.24	210.09	155.73					1	45.125	0.00657772	45.125	1	129.245	1.84821e-15	129.24	1	208.115	3.92528e-70	208.12
197	F5GYV0	Epithelial membrane protein 1 (Fragment)	EMP1							None	OA Unique	OA Unique	0	0	3							514290000	827960000	467460000			6.03237e+08	1	89.0761	1.75489e-225	312.78	297.68	312.78													0.89537	9.32348	0.00844283	65.805
198	B2R627	cDNA, FLJ92752, highly similar to Homo sapiens integrin, alpha 5 (fibronectin receptor, alphapolypeptide) (ITGA5), mRNA								None	OA Unique	None	0	1	2				51724000			174450000	306270000				240360000	1	157.628	1.56013e-200	302.73	281.77	157.63													1	160.976	2.67795e-38	160.98
199	B2R627	cDNA, FLJ92752, highly similar to Homo sapiens integrin, alpha 5 (fibronectin receptor, alphapolypeptide) (ITGA5), mRNA		1.93635	0.555066	23.9437	0.172893	0.0808713	0.186002	None	None	None	2	2	2	20455000	21402000		68412000		12638000		731830000	270380000	20928500	40525000	501105000	1	147.18	7.28315e-53	201.95	178.1	147.18	1	130.068	4.46199e-12	130.07	1	134.207	4.59274e-09	134.21	1	128.313	7.03875e-12	128.31	1	201.954	3.30876e-29	201.95
200	B2R627	cDNA, FLJ92752, highly similar to Homo sapiens integrin, alpha 5 (fibronectin receptor, alphapolypeptide) (ITGA5), mRNA		1.93635	0.555066	23.9437	0.172893	0.0808713	0.186002	None	None	None	2	2	2	20455000	21402000		68412000		12638000		731830000	270380000	20928500	40525000	501105000	1	147.18	7.28315e-53	201.95	178.1	147.18	1	130.068	4.46199e-12	130.07	1	134.207	4.59274e-09	134.21	1	128.313	7.03875e-12	128.31	1	201.954	3.30876e-29	201.95
201	B2R627	cDNA, FLJ92752, highly similar to Homo sapiens integrin, alpha 5 (fibronectin receptor, alphapolypeptide) (ITGA5), mRNA		1.7035	0.151704	12.0164	0.00701953	0.141765	0.00936162	None	Up	Down	3	3	3	16213000	15481000	13153000	34797000	14617000	26983000	140770000	243810000	154320000	14949000	2.54657e+07	1.79633e+08	1	194.185	0	429.74	404.54	194.19	1	142.975	1.31812e-18	142.97	1	143.566	1.22852e-18	143.57	1	131.539	5.98483e-12	131.54	1	100.389	5.04408e-28	171.91
202	B2R627	cDNA, FLJ92752, highly similar to Homo sapiens integrin, alpha 5 (fibronectin receptor, alphapolypeptide) (ITGA5), mRNA		1.7035	0.151704	12.0164	0.00701953	0.141765	0.00936162	None	Up	Down	3	3	3	16213000	15481000	13153000	34797000	14617000	26983000	140770000	243810000	154320000	14949000	2.54657e+07	1.79633e+08	1	194.185	0	429.74	404.54	194.19	1	142.975	1.31812e-18	142.97	1	143.566	1.22852e-18	143.57	1	131.539	5.98483e-12	131.54	1	100.389	5.04408e-28	171.91
203	B2R627	cDNA, FLJ92752, highly similar to Homo sapiens integrin, alpha 5 (fibronectin receptor, alphapolypeptide) (ITGA5), mRNA								KBD Unique	None	KBD Unique	0	2	0				21063000		21044000					21053500		0.999902	40.1008	3.27099e-41	179.47	151.26	179.47													0.999902	40.1008	3.27099e-41	179.47
204	B2R627	cDNA, FLJ92752, highly similar to Homo sapiens integrin, alpha 5 (fibronectin receptor, alphapolypeptide) (ITGA5), mRNA								None	None	None	1	1	2	12821000			108510000				721810000	240760000			481285000	0.999999	59.113	6.33692e-182	247.08	206.1	247.08	0.998126	27.5932	0.000768361	118.28	0.997991	27.0022	5.34021e-07	131.83					0.999993	53.6889	9.63362e-32	224.58
205	B2R627	cDNA, FLJ92752, highly similar to Homo sapiens integrin, alpha 5 (fibronectin receptor, alphapolypeptide) (ITGA5), mRNA		4.33523	0.000302043	39.292	0.0195366	0.110334	0.0261955	Up	Up	Down	3	3	3	28891000	23957000	23603000	120040000	114650000	96743000	772740000	1517300000	713870000	2.54837e+07	1.10478e+08	1.0013e+09	1	96.7408	2.18793e-156	291.22	258.7	291.22	0.999994	51.9943	3.15818e-08	140.08	0.999865	38.702	0.000110884	115.78	0.999783	36.6276	2.7526e-05	123.38	0.996427	24.4603	0.00176697	81.619
206	F8VV56	CD63 antigen	CD63	0.710737	0.631383	13.3808	0.000137371	0.0531164	0.000186319	None	Up	Down	3	3	3	137440000	365010000	232860000	412780000	37180000	72652000	3054900000	3680800000	3103300000	2.45103e+08	174204000	3.27967e+09	1	252.824	6.39396e-72	252.82	241.66	252.82	1	160.754	1.04644e-05	160.75	1	173.236	1.47564e-05	173.24	1	237.839	2.28638e-46	237.84	1	82.0285	1.20098e-05	137.28
207	F8VV56	CD63 antigen	CD63	5.01123	0.000168891	40.3022	0.0372649	0.124341	0.0487913	Up	Up	Down	3	3	2	36485000	52058000	32154000	219270000	201650000	183920000	1029100000	2213800000		4.02323e+07	2.01613e+08	1621450000	0.5	0	0.000311006	152.54	111.82	152.54	0.5	0	0.00388802	101.3	0.5	0	0.000311006	152.07	0.5	0	0.00753791	115.57	0.5	0	0.00389067	149.96
208	F8VV56	CD63 antigen	CD63	5.01123	0.000168891	40.3022	0.0372649	0.124341	0.0487913	Up	Up	Down	3	3	2	36485000	52058000	32154000	219270000	201650000	183920000	1029100000	2213800000		4.02323e+07	2.01613e+08	1621450000	0.992061	20.9676	1.34302e-127	290.2	216.96	282.13	0.5	0	0.00388802	101.3	0.5	0	0.000311006	152.07	0.982671	17.5363	0.00198112	169.58	0.992061	20.9676	8.11855e-110	282.13
209	F8VV56	CD63 antigen	CD63			1.60555	0.111673			None	None	None	3	1	3	65846000	63166000	96741000	51895000			103240000	160030000	99188000	75251000		1.20819e+08	1	161.017	3.85022e-253	325.79	311.76	263.75	1	178.395	1.64368e-251	318.18	1	173.582	3.01783e-225	309.88	1	159.828	2.94743e-225	310.04	1	192.997	3.85022e-253	325.79
210	H0YFA9	N-acetylglucosamine-6-sulfatase (Fragment)	GNS							KBD Unique	None	KBD Unique	0	2	0				5011800		7597100					6304450		1	44.2994	0.0206118	67.08	55.547	44.299													1	67.0795	0.0206118	67.08
211	H0YFA9	N-acetylglucosamine-6-sulfatase (Fragment)	GNS							None	None	None	0	1	0				5946700									0.999998	57.2474	0.00165843	88.075	75.067	88.075													0.999998	57.2474	0.00165843	88.075
212	B3KTQ2	cDNA FLJ38589 fis, clone HCHON2010074, highly similar to LACTADHERIN				6.99699	0.00824343			None	Up	None	3	1	3	56407000	18806000	31270000	26512000			293480000	287810000	163770000	3.54943e+07		2.48353e+08	1	68.428	5.44478e-128	279.77	241.53	237.41	0.999997	55.9706	1.96696e-80	246.63	0.999979	46.7599	1.82689e-22	184.96	0.999997	55.8052	1.00411e-36	208.27	0.999979	46.7599	1.82689e-22	184.96
213	B3KTQ2	cDNA FLJ38589 fis, clone HCHON2010074, highly similar to LACTADHERIN						0.304756	0.0971512	KBD Unique	OA Unique	None	0	2	3					70665000	59348000	309400000	165750000	164770000		65006500	2.13307e+08	1	116.372	7.31349e-10	200.6	162.88	116.37					1	96.3311	0.00728814	96.331					1	102.062	0.00368744	102.06
214	B3KTQ2	cDNA FLJ38589 fis, clone HCHON2010074, highly similar to LACTADHERIN								None	None	None	1	0	1			7665100					61900000					0.985829	18.424	0.000647465	92.264	81.144	89.982									0.985829	18.424	0.000647465	89.982
215	B3KTQ2	cDNA FLJ38589 fis, clone HCHON2010074, highly similar to LACTADHERIN		1.02116	0.986172					None	CK Unique	KBD Unique	2	2	0	1078500000	3225600000		4263200000		131960000				2152050000	2197580000		1	139.174	0	344.48	327.43	344.48	1	139.174	0	344.48	1	66.6824	2.13491e-116	239.87					0.999948	42.8725	2.6168e-09	118.33
216	B3KTQ2	cDNA FLJ38589 fis, clone HCHON2010074, highly similar to LACTADHERIN				4.28329	0.199357			None	None	None	2	1	3		639700000	2206100000	557460000			3005900000	10251000000	5027200000	1422900000		6094700000	1	146.596	0	397.27	387.48	397.27					1	86.9371	1.37774e-266	326.81	1	146.596	0	397.27	1	98.6372	0	356.59
217	A0A024RC61	Aminopeptidase (EC 3.4.11.-)	ANPEP hCG_27217					0.382314	0.23858	KBD Unique	OA Unique	None	0	3	3				140710000	98302000	137300000	158230000	618300000	207770000		1.25437e+08	328100000	1	84.6583	2.12579e-13	175.49	175.49	84.658													1	88.1865	6.59405e-05	170.02
218	A0A024RC61	Aminopeptidase (EC 3.4.11.-)	ANPEP hCG_27217					0.246214	0.0956686	KBD Unique	OA Unique	None	0	3	3				1104400000	47299000	180130000	875140000	2712100000	1822000000		443943000	1803080000	0.999942	42.3678	1.47941e-76	226.71	208.42	226.71													0.999942	42.3678	1.47941e-76	226.71
219	A0A024RC61	Aminopeptidase (EC 3.4.11.-)	ANPEP hCG_27217							KBD Unique	None	None	0	3	1				89474000	32852000	51219000		314960000			5.78483e+07		1	79.9855	5.11985e-31	230.24	177.08	79.986													1	132.01	5.11985e-31	230.24
220	A0A024RC61	Aminopeptidase (EC 3.4.11.-)	ANPEP hCG_27217							None	None	None	0	1	0				120870000									1	171.931	1.62012e-29	193.38	167.64	193.38													1	171.931	2.80018e-06	193.38
221	A0A024RC61	Aminopeptidase (EC 3.4.11.-)	ANPEP hCG_27217							KBD Unique	None	KBD Unique	0	3	0				67408000	89195000	74216000					7.69397e+07		0.99989	39.5714	0	367.86	336.38	367.86													0.99989	39.5714	0	367.86
222	E9PJC8	Tetraspanin (Fragment)	CD151							None	None	None	0	1	0				19530000									0.827709	6.81615	2.00575e-14	117.22	112.55	117.22													0.827709	6.81615	2.00575e-14	117.22
223	A0A087WYV6	Tetraspanin-6	TSPAN6	0.982882	0.981567					None	CK Unique	KBD Unique	2	2	0		63713000	40798000	83699000	19023000					52255500	51361000		1	96.0269	0.00188702	139.74	129.33	96.027					1	85.1608	0.023152	85.161	1	139.74	0.00232469	139.74	1	130.279	0.00188702	130.28
224	A0A1W2PQR6	Lysosome membrane protein 2	SCARB2	6.37282	0.364558	39.3203	0.137858	0.162075	0.18741	None	None	None	2	2	3	15962000	16131000		176340000		28183000	405050000	1104500000	383310000	16046500	102261500	6.30953e+08	1	129.277	3.54616e-94	256.04	213.83	256.04	0.999999	60.6264	9.83458e-21	171.29	0.999994	52.4699	1.79943e-25	192.86					1	129.277	3.54616e-94	256.04
225	A0A1W2PQR6	Lysosome membrane protein 2	SCARB2					0.0578733	0.114533	None	None	None	1	2	3	18228000			43291000		19841000	314710000	900820000	420770000		31566000	5.45433e+08	1	84.8965	1.76554e-21	176.21	167.17	176.21	0.999995	52.8014	0.000647086	89.913									1	72.9826	5.94784e-15	145.91
226	A0A1W2PQR6	Lysosome membrane protein 2	SCARB2							KBD Unique	None	None	0	3	1				69434000	66231000	84133000		258100000			73266000		1	118.239	7.10143e-08	130.27	108.26	118.24	1	97.2844	8.15221e-05	97.284					1	76.768	0.000790473	76.768	1	61.4775	0.00011549	106.16
227	B4E3A7	cDNA FLJ52057, highly similar to Periostin						0.168079	0.0307237	KBD Unique	OA Unique	Down	0	3	3				908410000	9748300	83091000	2588900000	2176600000	1191500000		3.3375e+08	1.98567e+09	1	169.795	1.0551e-58	244.06	195.27	244.06													1	169.795	1.0551e-58	244.06
228	U3KPX5	Integrin beta-like protein 1 (Fragment)	ITGBL1							None	None	None	0	1	1				33859000			337160000						1	327.145	2.7853e-217	327.15	266.71	327.15													1	280.835	6.17518e-109	280.83
229	B3KRY3	cDNA FLJ35079 fis, clone PLACE6005283, highly similar to Lysosome-associated membrane glycoprotein 1		4.54783	0.265162					None	CK Unique	KBD Unique	2	3	0	26059000	10652000		133170000	105280000	11983000				18355500	8.34777e+07		1	84.9155	1.41669e-29	234.47	159.28	84.916	1	163.985	0.0361994	163.99	1	140.139	0.0398066	140.14					1	234.471	1.41669e-29	234.47
230	B3KRY3	cDNA FLJ35079 fis, clone PLACE6005283, highly similar to Lysosome-associated membrane glycoprotein 1		4.19745	0.228085	34.3193	0.0817237	0.122306	0.103104	None	None	None	2	2	3	24224000		21408000	138230000		53308000	591510000	1237500000	520080000	22816000	95769000	783030000	1	159.445	3.09358e-31	218.06	172.25	159.44	1	67.6563	0.0239931	67.656					1	171.322	3.80724e-09	171.32	1	218.062	3.09358e-31	218.06
231	B3KRY3	cDNA FLJ35079 fis, clone PLACE6005283, highly similar to Lysosome-associated membrane glycoprotein 1		2.71219	0.00324114	20.4385	0.0192711	0.1327	0.0248216	Up	Up	Down	3	3	2	29088000	22108000	21248000	75458000	66528000	54496000	356820000	630280000		24148000	65494000	493550000	1	223.927	3.67865e-112	223.93	170.05	223.93	1	182.391	0.000436734	182.39	1	124.743	0.000310143	124.74	1	182.646	0.000418334	182.65	1	217.504	4.71396e-22	217.5
232	B3KRY3	cDNA FLJ35079 fis, clone PLACE6005283, highly similar to Lysosome-associated membrane glycoprotein 1								None	None	None	0	0	1								39926000					1	126.832	1.34465e-15	184.1	165.35	126.83
233	B3KRY3	cDNA FLJ35079 fis, clone PLACE6005283, highly similar to Lysosome-associated membrane glycoprotein 1								None	None	None	0	0	1								39926000					1	126.832	1.34465e-15	184.1	165.35	126.83
234	Q29900	HLA-DR (Fragment)								KBD Unique	None	KBD Unique	0	2	0				13596000		8613200					11104600		1	76.1697	0.00426541	105.36	101.47	76.17													1	105.358	0.00426541	105.36
235	V5NQS1	Truncated MHC class I antigen	HLA-C							None	None	None	0	1	0				33343000									1	132.567	0.00185393	132.57	124.88	132.57													1	132.567	0.00185393	132.57
236	O19189	HLA-B protein (Fragment)	HLA-B							None	None	None	0	0	1								311730000					1	151.721	5.79801e-80	224.53	151.72	224.53
237	P04062	Lysosomal acid glucosylceramidase (Lysosomal acid GCase) (EC 3.2.1.45) (Acid beta-glucosidase) (Alglucerase) (Beta-glucocerebrosidase) (Beta-GC) (Cholesterol glucosyltransferase) (SGTase) (EC 2.4.1.-) (Cholesteryl-beta-glucosidase) (EC 3.2.1.104) (D-glucosyl-N-acylsphingosine glucohydrolase) (Imiglucerase)	GBA GC GLUC	0.728767	0.243686	4.8034	0.00390004	0.151719	0.0030452	None	Up	Down	3	3	3	77955000	47718000	64713000	33961000	40846000	63940000	258660000	383040000	272800000	63462000	46249000	3.04833e+08	0.999958	43.8023	9.79379e-05	116.96	90.813	97.797	0.995349	23.3044	0.00189017	80.632	0.986237	18.5528	0.00576135	71.08	0.999958	43.8023	0.00128404	97.797	0.999863	38.6364	0.000641684	107.61
238	P04062	Lysosomal acid glucosylceramidase (Lysosomal acid GCase) (EC 3.2.1.45) (Acid beta-glucosidase) (Alglucerase) (Beta-glucocerebrosidase) (Beta-GC) (Cholesterol glucosyltransferase) (SGTase) (EC 2.4.1.-) (Cholesteryl-beta-glucosidase) (EC 3.2.1.104) (D-glucosyl-N-acylsphingosine glucohydrolase) (Imiglucerase)	GBA GC GLUC							None	OA Unique	None	0	1	2				13686000			119970000	224870000				172420000	1	140.114	1.79039e-20	140.11	125.53	140.11													1	58.3613	0.00583642	58.361
239	A0A075B728	Platelet endothelial cell adhesion molecule (Fragment)	PECAM1							None	None	None	0	1	0				6732700									1	159.276	5.0124e-20	159.28	134.35	159.28													1	116.372	0.00401031	116.37
240	Q6QIN1	CD45 (Fragment)	PTPRC							KBD Unique	None	None	0	2	1				25497000		14514000		90020000			20005500		1	174.045	4.3793e-13	203.52	189.71	203.52													1	109.312	8.9693e-06	146.79
241	A0A180H729	MHC class II antigen (Fragment)	HLA-DPB1							None	None	None	0	1	0				93166000									1	185.599	3.91035e-06	185.6	160.04	185.6													1	185.599	3.91035e-06	185.6
242	A0A087WSY5	Carboxypeptidase B2	CPB2							None	None	None	0	1	1				41646000				267220000					1	113.222	7.00734e-60	243.11	188.05	243.11					0.999982	47.4385	0.00640376	70.927	0.998748	29.0189	0.0388743	44.567	1	113.222	7.00734e-60	243.11
243	A0A087WT00	CD302 antigen	CD302							None	OA Unique	None	0	1	2				12326000			62105000	100310000				81207500	0.99522	23.1849	3.2625e-05	144.77	104.42	138.08													0.977651	16.4093	3.2625e-05	144.77
244	A0A087X1V2	Neural cell adhesion molecule 1 (Fragment)	NCAM1							None	None	None	0	1	1				9266600					80401000				0.617409	2.07838	6.07474e-05	128.01	101.04	98.898													0.560172	1.05039	0.00667018	80.014
245	E9PPH3	Receptor-type tyrosine-protein phosphatase eta (Fragment)	PTPRJ							None	None	None	0	0	1								14727000					1	77.379	0.00104941	138.08	128.69	77.379
246	B7Z687	cDNA FLJ59293, highly similar to Roundabout homolog 1 (Fragment)								None	None	None	0	0	0													1	103.563	0.0198878	103.56	52.956	103.56													1	103.563	0.0198878	103.56
247	K9J972	FAS receptor variant 9 (Tumor necrosis factor receptor superfamily member 6)	FAS							None	None	None	0	0	0													1	91.4567	0.000149582	91.457	79.539	91.457													1	91.4567	0.000149582	91.457
248	A0A087WVS4	High affinity immunoglobulin gamma Fc receptor IB	FCGR1B							KBD Unique	None	KBD Unique	0	2	0				29837000		6584600					18210800		1	101.954	4.37504e-23	213.34	182.27	101.95													1	213.344	4.37504e-23	213.34
249	A0A0C4DGM1	Tryptase alpha/beta-1 (Fragment)	TPSAB1							None	None	None	0	0	0													0.999999	59.9168	7.9548e-05	60.521	53.945	60.521													0.999999	59.9168	7.9548e-05	60.521
250	A0A087WUZ2	IgGFc-binding protein	FCGBP							None	None	None	0	0	0													1	123.625	7.14857e-05	123.63	93.371	123.63													1	123.625	7.14857e-05	123.63
251	X6R6A3	Glycosylated lysosomal membrane protein	GLMP							None	None	None	0	1	0				11078000									1	113.706	0.00203125	113.71	54.789	113.71													1	113.706	0.00203125	113.71
252	A0A087WVP1	Protocadherin Fat 1	FAT1							None	None	None	0	0	0													1	83.729	0.00223566	83.729	71.102	83.729
253	A0A087WW43	Inter-alpha-trypsin inhibitor heavy chain H3	ITIH3							None	None	None	0	1	1				29534000				63032000					1	128.11	8.04035e-09	154.65	138.51	154.65													1	126.181	3.48255e-08	152.85
254	A0A0G2JP90	Nodal modulator 1	NOMO1							None	None	None	0	1	0				10918000									1	89.9653	0.0119857	95.523	62.683	95.523													1	89.9653	0.0119857	95.523
255	A0A0G2JP90	Nodal modulator 1	NOMO1							None	None	None	0	1	0				6938700									0.999999	59.6447	0.00246909	77.562	57.723	77.562													0.999999	59.6447	0.00246909	77.562
256	A0A087WYF1	Laminin subunit alpha-2	LAMA2							None	OA Unique	None	0	1	2				3127500			15502000	12681000				14091500	1	82.7494	0.00750244	103.55	92.854	82.749													1	82.7494	0.0178376	82.749
257	A0A087WYF1	Laminin subunit alpha-2	LAMA2							None	None	None	0	1	0				7361100									1	70.0319	3.19829e-114	220.39	190.65	220.39													0.99968	34.9757	1.45111e-05	173.37
258	A0A087WYF1	Laminin subunit alpha-2	LAMA2							None	OA Unique	None	0	1	3				8863300			90778000	39883000	50673000			6.04447e+07	1	138.545	0.0033655	138.54	54.93	138.54													1	83.2061	0.0284067	83.206
259	A0A087WYF1	Laminin subunit alpha-2	LAMA2							None	None	None	0	0	1							283310000						1	161.989	5.5604e-24	164.9	148.52	161.99													1	100.086	0.00209278	100.09
260	A0A087WXP0	Azurocidin	AZU1							CK Unique	None	None	2	0	1	64877000		75511000						279730000	70194000			1	258.82	3.30373e-181	258.82	232.7	258.82	1	214.239	2.76883e-69	214.24	1	233.791	3.30373e-181	233.79	1	142.325	3.40008e-89	231.77
261	A0A087WXP0	Azurocidin	AZU1							CK Unique	None	None	2	0	1	64877000		75511000						279730000	70194000			1	258.82	3.30373e-181	258.82	232.7	258.82	1	214.239	2.76883e-69	214.24	1	233.791	3.30373e-181	233.79	1	142.325	3.40008e-89	231.77
262	Q8WW96	CFHR3 protein	CFHR3	0.954164	0.912358	19.2334	0.036572	0.0496096	0.00957491	None	Up	Down	2	3	3	16323000	27587000		29966000	10547000	22333000	435960000	563730000	267120000	21955000	2.09487e+07	422270000	1	138.084	1.85591e-14	138.08	116.24	138.08	1	55.6879	0.0137871	55.688	1	99.0214	0.000453824	99.021					1	122.306	8.1537e-09	122.31
263	B4DTC0	cDNA FLJ53096, highly similar to Collagen alpha-2(V) chain						0.250811	0.065647	None	None	None	1	3	3			8046700	227670000	64626000	94806000	389390000	803180000	350830000		129034000	5.14467e+08	1	110.135	3.11607e-08	192.64	145.29	110.14									1	76.4649	0.02007	76.465	1	192.639	3.11607e-08	192.64
264	Q8IV28	NID2 protein	NID2							KBD Unique	None	None	0	2	1				53883000		25028000		224890000			39455500		1	55.7239	0.000288245	100.07	86.262	55.724													1	74.1501	0.00824776	74.15
265	Q8IV28	NID2 protein	NID2	5.61348	0.00122955					Up	None	None	3	3	1	33518000	36796000	59347000	277270000	198940000	251640000	691840000			4.32203e+07	2.42617e+08		1	278.015	3.44375e-102	278.02	240.54	278.02	1	112.129	0.000924724	112.13	1	131.819	1.71478e-05	155.06	1	123.792	4.94669e-05	123.79	1	172.804	2.1913e-05	172.8
266	A0A087X0A8	Collagen alpha-1(XII) chain	COL12A1	8.60694	0.419087	26.142	0.0889754	0.329238	0.280431	None	None	None	3	3	3	262280000	608030000	392280000	10735000000	14627000	117410000	7238000000	20401000000	5367600000	4.20863e+08	3.62235e+09	11002200000	1	127.777	1.16565e-142	260.19	222.64	127.78	1	120.838	8.29872e-14	156.36	1	139.885	7.76222e-08	139.89	1	158.399	9.32526e-14	158.4	1	260.194	1.16565e-142	260.19
267	A0A087X0A8	Collagen alpha-1(XII) chain	COL12A1	17.1481	0.222679	47.2322	0.0965188	0.363059	0.280423	None	None	None	3	3	3	155800000	180800000	133380000	6057500000	160950000	1840800000	4966900000	14018000000	3213300000	156660000	2.68642e+09	7399400000	1	134.26	1.50286e-06	195.58	153.47	134.26	1	100.246	0.00946723	100.25	1	129.625	0.000595074	129.63	1	113.74	0.000430932	123.29	1	90.6291	0.000810827	180.27
268	A0A087X0A8	Collagen alpha-1(XII) chain	COL12A1	7.51221	0.0918541	7.63186	0.01696	0.984322	0.973469	None	Up	None	3	3	3	70005000	42722000	33865000	635780000	144310000	321140000	228700000	510910000	379160000	48864000	3.67077e+08	3.72923e+08	0.999986	48.5503	3.53539e-29	213.38	176.03	210.91	0.999986	48.5503	7.00104e-29	210.91	0.999926	41.2999	1.01663e-17	190.53	0.997809	26.5844	1.89116e-18	196.24	0.999949	42.8926	3.74364e-18	194.96
269	Q6LAM1	Heavy chain of factor I (Fragment)						0.121669	0.0817174	None	None	None	1	2	3		37442000		95010000		30589000	249410000	683280000	615760000		62799500	516150000	0.999566	33.6188	1.6081e-30	167.67	156.52	157.24					0.964019	14.2802	0.000179797	126.39	0.937921	11.7922	0.00957891	89.171	0.999479	32.8332	1.06975e-05	143.89
270	Q6LAM1	Heavy chain of factor I (Fragment)								None	None	None	0	0	0													1	56.2147	0.0136699	56.215	36.662	56.215									1	45.1397	0.0310559	45.14
271	B4DHM2	cDNA FLJ57983, highly similar to Cat eye syndrome critical region protein 1								None	None	None	0	1	1				19455000				197550000					1	183.03	1.38928e-09	183.03	129.26	183.03													1	144.55	1.16348e-08	144.55
272	A0A087X0S5	Collagen alpha-1(VI) chain	COL6A1							None	OA Unique	OA Unique	0	0	2								20063000	9838000			14950500	0.999985	48.1736	6.01115e-20	115.2	107.2	106.66
273	A0A087X0S5	Collagen alpha-1(VI) chain	COL6A1							None	None	None	0	0	0													0.998691	28.8178	0.00067646	46.608	39.407	46.608
274	A0A087X0S5	Collagen alpha-1(VI) chain	COL6A1					0.760124	0.456174	KBD Unique	OA Unique	None	0	3	3				809200000	191550000	423380000	613280000	671190000	589080000		474710000	6.24517e+08	1	132.01	2.50355e-05	152.28	118.02	132.01													1	152.277	0.000719506	152.28
275	A0A087X0S5	Collagen alpha-1(VI) chain	COL6A1							None	None	None	0	1	0				26138000									1	90.3698	0.0207718	90.37	45.678	90.37													1	90.3698	0.0207718	90.37
276	A0A087X0S5	Collagen alpha-1(VI) chain	COL6A1	16.5796	0.305987	70.9824	0.000129721	0.233573	0.0182614	None	Up	Down	3	3	3	26731000	69586000	28366000	1791900000	94914000	180380000	2581500000	3002600000	3266200000	41561000	6.89065e+08	2950100000	1	307.974	1.06671e-178	307.97	239.96	307.97	1	84.3649	3.3587e-05	160.77	1	117.029	8.90591e-72	257.88	1	125.033	2.1267e-09	197.21	1	177.039	2.1267e-09	197.21
277	F5H125	Cell adhesion molecule 1 (Fragment)	CADM1							None	None	None	0	1	0				29794000									1	235.312	3.39551e-67	235.31	205.97	235.31													1	235.312	3.39551e-67	235.31
278	F5H125	Cell adhesion molecule 1 (Fragment)	CADM1							KBD Unique	None	None	0	2	1					141410000	112260000		242270000			126835000		1	169.655	1.12542e-21	195.27	158.89	169.65
279	F5H125	Cell adhesion molecule 1 (Fragment)	CADM1					0.150391	0.0795197	KBD Unique	OA Unique	None	0	3	3				80195000	8226700	49109000	193970000	522370000	198150000		4.58436e+07	304830000	1	105.032	3.07991e-40	227.37	189.07	105.03													1	227.373	3.07991e-40	227.37
280	A0A087X191	Beta-1,3-N-acetylglucosaminyltransferase lunatic fringe	LFNG							None	None	None	2	1	1	22419000	57735000				4619300	26156000			40077000			1	122.932	3.18844e-20	180.64	146.95	180.64	0.999824	37.5405	0.0206112	56.121	1	122.932	1.03238e-15	180.64	1	105.049	3.18844e-20	143.14
281	A0A087X1T7	Aggrecan core protein	ACAN							None	None	None	0	0	1							121430000						1	220.239	8.23829e-204	220.24	196.5	220.24													1	92.4048	1.71633e-24	92.405
282	A0A087X1T7	Aggrecan core protein	ACAN							None	None	OA Unique	1	0	3			48141000				71056000	111270000	143620000			1.08649e+08	1	107.52	3.94198e-57	190.5	188.54	107.52	1	65.2747	0.000458392	71.297	1	107.52	2.18955e-10	107.52	1	88.3938	3.94198e-57	190.5
283	A0A087X1T7	Aggrecan core protein	ACAN							None	None	None	0	0	0													0.563017	0	2.01646e-63	164.35	151.94	81.28
284	A0A087X1T7	Aggrecan core protein	ACAN							None	None	None	0	0	0													0.563017	0	2.01646e-63	164.35	151.94	81.28
285	A0A087X1T7	Aggrecan core protein	ACAN							None	None	None	0	0	0													0.908022	6.93382	3.0925e-54	133.94	124.31	133.94
286	A0A087X1T7	Aggrecan core protein	ACAN	0.223159	0.0286173	3.35447	0.036923	0.0665259	0.0127716	Down	Up	Down	3	3	3	3305500000	6699300000	3827800000	1313500000	1069400000	703970000	11942000000	12269000000	22190000000	4.61087e+09	1.02896e+09	15467000000	1	229.48	7.22867e-46	237.92	225.88	229.48	1	94.6921	4.67851e-05	166.19	1	117.698	1.74669e-06	187.16	1	87.2981	8.08192e-09	196.27	1	152.973	2.14351e-05	152.97
287	A0A087X1T7	Aggrecan core protein	ACAN			0.216643	0.0275979			None	Down	None	3	1	3	707700000	1280700000	1484500000	390020000			22221000	248390000	481770000	1.15763e+09		2.50794e+08	1	98.9913	0	362.06	347.58	98.991	1	46.1488	0	362.06	1	86.675	0	356.79	1	47.1044	3.602e-272	312.35	1	133.228	0	326.56
288	A0A087X1T7	Aggrecan core protein	ACAN	0.353618	0.406381	10.8196	0.00128592	0.032683	0.00522481	None	Up	Down	3	2	3	56460000	915630000	468320000	215800000	123770000		6131400000	5155300000	4298000000	4.80137e+08	169785000	5194900000	1	77.0577	0.00370569	180.44	117.72	77.058	1	81.2967	0.0303756	81.297	1	132.567	0.00370569	132.57	1	180.438	0.00412181	180.44	1	116.25	0.00804335	116.25
289	A0A087X1T7	Aggrecan core protein	ACAN	0.514959	0.0210103	0.718393	0.476675	0.716821	0.622371	None	None	None	3	3	3	105630000000	107420000000	110900000000	80496000000	54673000000	31652000000	117630000000	113280000	114980000000	1.07983e+11	55607000000	7.75744e+10	1	52.3294	9.67807e-14	198.07	182.85	52.329	1	135.843	0.00550967	164.53	1	95.9093	0.00353769	179.21	1	86.095	9.67807e-14	152.63	1	84.5678	0.000114235	194.44
290	A0A087X1T7	Aggrecan core protein	ACAN	0.527624	0.0042063	1.59132	0.000681424	0.331563	0.000207317	None	None	Down	3	3	3	126710000000	143230000000	126340000000	86128000000	54891000000	68068000000	222260000000	204560000000	203790000000	1.32093e+11	6.96957e+10	2.10203e+11	1	130.154	1.41278e-126	276.41	258.74	130.15	1	112.506	1.02856e-36	212.59	1	126.885	1.87919e-67	241.51	1	124.908	1.87919e-67	241.51	1	114.336	1.41278e-126	276.41
291	A0A087X1T7	Aggrecan core protein	ACAN	0.498536	0.110005	1.05787	0.811191	0.471263	0.143373	None	None	None	3	3	3	100520000000	137910000000	117050000000	89789000000	5400400000	82030000000	152440000000	147380000000	76232000000	1.18493e+11	5.90731e+10	1.25351e+11	1	82.9247	0	377.09	331.26	82.925	1	69.9345	2.41719e-109	266.6	1	80.5075	0	370.69	1	131.664	1.98812e-171	282.32	1	108.971	2.24666e-145	282.3
292	I3L192	Basigin (Fragment)	BSG	3.69075	0.00674711	41.7759	0.0349639	0.0883462	0.0114691	Up	Up	Down	2	3	3	62016000		84957000	305120000	278110000	230430000	1808900000	3622200000	3778800000	73486500	271220000	3.06997e+09	1	131.031	0.000148533	164.72	137.59	131.03	1	101.431	0.0144947	101.43					1	56.4338	0.00192775	127.46	1	145.13	0.00243085	145.13
293	I3L192	Basigin (Fragment)	BSG	1.48214	0.514835	16.1648	0.0119786	0.0916892	0.013504	None	Up	Down	3	3	3	68184000	174710000	38996000	223190000	56050000	138560000	1131800000	2161500000	1263400000	9.39633e+07	1.39267e+08	1518900000	1	199.494	9.50062e-127	274.24	205.8	199.49	1	155.03	5.2172e-21	161.19	1	188.706	1.49327e-25	188.71	1	166.759	5.06848e-21	166.76	1	237.461	1.09678e-67	237.46
294	B7Z230	Peptidylprolyl isomerase (EC 5.2.1.8)								None	None	None	0	0	0													1	265.949	0	294.93	242.66	294.93
295	B7Z230	Peptidylprolyl isomerase (EC 5.2.1.8)		6.64018	0.215828	22.1359	0.0949898	0.299973	0.102409	None	None	None	2	3	3	18871000	11136000		168140000	23708000	107030000	256140000	533850000	206360000	15003500	99626000	3.32117e+08	1	168.445	0	341.27	293.27	194.27	1	121.94	6.25693e-21	151.63	1	100.366	1.77537e-05	109.65	1	96.0953	2.10269e-08	105.79	1	249.615	7.85064e-157	281.5
296	B7Z230	Peptidylprolyl isomerase (EC 5.2.1.8)								None	None	None	0	1	1				112650000				2875100000					1	167.92	0	352.12	328.3	167.92													1	352.117	0	352.12
297	Q96JW9	cDNA FLJ14925 fis, clone PLACE1008643, weakly similar to INTER-ALPHA-TRYPSIN INHIBITOR HEAVY CHAIN H2				7.9535	0.0265904			None	Up	None	2	1	3	29291000		19594000	28800000			169250000	258220000	155740000	24442500		1.94403e+08	0.999893	39.72	8.10272e-15	150.21	127.74	141.32	0.999435	32.4794	0.000442554	104.98					0.99804	27.069	0.00156946	89.959	0.998814	29.255	0.0011306	101.6
298	B7Z938	cDNA FLJ61727, highly similar to Laminin alpha-4 chain (Fragment)								None	None	None	0	0	1								96348000					1	349.468	0	349.47	328.17	349.47
299	B7Z938	cDNA FLJ61727, highly similar to Laminin alpha-4 chain (Fragment)								KBD Unique	None	KBD Unique	0	3	0				17807000	10740000	22485000					1.70107e+07		0.999993	51.2769	6.47608e-31	221.8	156.45	221.8													0.999993	51.2769	6.47608e-31	221.8
300	B7Z938	cDNA FLJ61727, highly similar to Laminin alpha-4 chain (Fragment)								None	OA Unique	None	0	1	2				76697000			189060000	509010000				349035000	1	105.391	0.00436292	128.48	79.981	105.39													1	120.488	0.00644393	120.49
301	B7Z938	cDNA FLJ61727, highly similar to Laminin alpha-4 chain (Fragment)								None	None	None	0	0	1								44151000					1	162.684	2.87728e-09	162.68	126.1	162.68
302	B7Z938	cDNA FLJ61727, highly similar to Laminin alpha-4 chain (Fragment)						0.153149	0.167896	KBD Unique	OA Unique	None	0	2	3					22749000	29139000	131610000	289390000	87210000		25944000	1.69403e+08	1	116.41	4.62502e-06	160.86	110.57	116.41													1	83.3966	0.0106391	83.397
305	P01857	Immunoglobulin heavy constant gamma 1 (Ig gamma-1 chain C region) (Ig gamma-1 chain C region EU) (Ig gamma-1 chain C region KOL) (Ig gamma-1 chain C region NIE)	IGHG1	2.27873	0.502498	21.8752	0.00873308	0.104169	0.0135841	None	Up	Down	3	3	3	777940000	3681900000	1566300000	11326000000	865120000	1540800000	29558000000	59666000000	42599000000	2.00871e+09	4.57731e+09	43941000000	1	305.117	6.04605e-261	312.99	286.03	305.12	1	190.263	5.9464e-05	190.26	1	304.048	4.46558e-232	304.05	1	276.026	6.08802e-157	276.03	1	312.988	6.04605e-261	312.99
306	A0A0A0MS09	Immunoglobulin heavy constant delta (Fragment)	IGHD							None	None	None	0	0	0													1	128.484	0.000835826	128.48	53.636	128.48
307	C9IYP2	Phosphatidate phosphatase LPIN1 (Fragment)	LPIN1							None	None	None	0	0	0													1	56.4815	0.015546	56.482	28.27	56.482									1	56.4815	0.015546	56.482
308	Q5JB40	Selectin-like protein								None	None	None	0	1	0				22305000									0.5	0	6.89817e-05	130.98	91.834	130.98													0.5	0	6.89817e-05	130.98
309	Q5JB40	Selectin-like protein								KBD Unique	None	KBD Unique	0	2	0				22305000		18530000					20417500		0.862999	7.99285	6.89817e-05	130.98	91.834	91.855													0.5	0	6.89817e-05	130.98
310	Q5JB40	Selectin-like protein								None	None	None	0	1	0				23165000									1	145.723	3.08022e-05	145.72	130.08	145.72													1	145.723	3.08022e-05	145.72
311	Q5JB40	Selectin-like protein								None	None	None	0	0	0													1	106.007	0.000158353	106.01	91.446	106.01													1	106.007	0.000158353	106.01
312	Q5JB40	Selectin-like protein								None	None	None	0	1	0				18572000									1	305.982	1.10588e-189	305.98	275.25	305.98													1	305.982	1.10588e-189	305.98
313	Q5JB40	Selectin-like protein								None	None	None	0	0	0													1	60.4007	0.0177534	60.401	52.096	60.401
314	B4DVS2	cDNA FLJ57617								KBD Unique	None	None	0	2	1				41496000		17601000	163820000				29548500		0.5	0	0.0195477	53.278	17.53	53.278													0.5	0	0.030729	45.608
315	B4DVS2	cDNA FLJ57617								KBD Unique	None	None	0	2	1				41496000		17601000	163820000				29548500		0.5	0	0.0195477	53.278	17.53	53.278													0.5	0	0.030729	45.608
316	A0A0A0MTT8	Growth/differentiation factor 15 (Fragment)	GDF15			3.58821	0.0367964			None	Up	None	2	1	2		7561600	8859700	9476600			25319000	33604000		8210650		29461500	1	166.769	1.14302e-119	263.59	235.31	263.59	1	107.19	4.93374e-39	157.86	1	121.566	7.48616e-29	173.44	1	157.446	2.14813e-65	232.53	1	120.7	4.21963e-39	202.13
317	Q29834	HLA-DRB1*1605 protein (Fragment)	HLA-DRB1*1605							None	None	None	0	1	0						19319000							1	96.2529	0.017907	96.253	86.266	96.253
318	A0A0A6YY99	Protein TNFSF12-TNFSF13	TNFSF12-TNFSF13							CK Unique	CK Unique	None	3	0	0	11177000	23128000	16842000							17049000			1	124.834	0.00495051	124.83	57.841	124.83	1	91.6263	0.0224909	91.626	1	124.834	0.00495051	124.83	1	124.834	0.00495051	124.83
319	A0A0A6YY99	Protein TNFSF12-TNFSF13	TNFSF12-TNFSF13	0.349767	0.0990229					None	None	None	3	3	1	123640000	134700000	40482000	23675000	41178000	39665000		113960000		9.96073e+07	3.48393e+07		1	129.146	8.22806e-20	147.07	120.44	129.15	1	121.655	2.01327e-08	140.96	1	140.928	2.05455e-08	140.93	1	137.192	6.92401e-08	137.19	1	73.5933	0.00451373	73.593
320	B4DIP7	cDNA FLJ57114, highly similar to Niemann-Pick C1 protein								None	None	None	0	1	0				3848100									0.994898	22.9005	0.00435903	106.4	89.374	106.4													0.994898	22.9005	0.00435903	106.4
321	Q6ZNN4	cDNA FLJ27428 fis, clone WMD05691, highly similar to Collagen alpha 2(XI) chain								KBD Unique	None	None	0	2	1					46983000	69731000			384330000		58357000		1	201.476	4.92442e-23	201.48	177.62	201.48
322	A8MSM7	Microtubule-associated protein 9	MAP9							None	None	None	1	0	0			33639000										1	89.5479	0.00186404	89.548	27.245	89.548									1	89.5479	0.00186404	89.548
323	A8MSM7	Microtubule-associated protein 9	MAP9							None	None	None	1	0	0			33639000										1	89.5479	0.00186404	89.548	27.245	89.548									1	89.5479	0.00186404	89.548
324	A8MSM7	Microtubule-associated protein 9	MAP9							None	None	None	1	0	0			33639000										1	89.5479	0.00186404	89.548	27.245	89.548									1	89.5479	0.00186404	89.548
325	K7ELZ9	Nicalin (Fragment)	NCLN							None	None	None	0	1	0				19834000									1	92.4704	0.0221814	92.47	34.911	92.47													1	92.4704	0.0221814	92.47
326	A0A0C4DGX7	GDP-fucose protein O-fucosyltransferase 2	POFUT2	1.03501	0.959706	44.9986	0.141035	0.0230009	0.141337	None	None	None	2	2	2		15525000	16632000		26496000	6786800	425320000	1021700000		16078500	16641400	723510000	1	245.501	6.13216e-53	245.5	202.38	245.5	1	119.528	0.0013672	119.53	1	130.94	0.000671832	130.94	1	148.321	0.000898982	148.32
327	A6NLC6	V-type proton ATPase subunit S1 (Fragment)	ATP6AP1					0.115391	0.0943475	KBD Unique	OA Unique	None	0	3	3				10670000	13419000	10658000	73811000	180200000	47113000		1.15823e+07	1.00375e+08	1	69.7632	2.26376e-05	108.18	96.72	69.763													1	65.7837	0.00621873	65.784
328	A0A0C4DH07	Latent-transforming growth factor beta-binding protein 4	LTBP4							None	None	None	1	1	0			3369600	15496000									1	253.882	2.06432e-213	253.88	239.2	253.88									1	94.1915	0.00238181	94.191	1	231.063	8.9162e-48	231.06
329	A0A172Q3A0	Fibroblast activation protein (Fragment)								None	None	None	0	1	0				11164000									1	110.633	0.000208435	117.4	111.94	110.63													1	70.9919	0.000208435	117.4
330	A0A172Q3A0	Fibroblast activation protein (Fragment)						0.168983	0.0601142	KBD Unique	OA Unique	None	0	3	3				58400000	18586000	19500000	140360000	308700000	121920000		32162000	1.90327e+08	1	103.546	0.00545319	107.15	74.313	103.55													1	103.7	0.0074109	103.7
331	A0A172Q3A0	Fibroblast activation protein (Fragment)								None	OA Unique	OA Unique	0	0	2							236850000	641890000				439370000	1	132.683	5.29132e-182	284.73	256.03	265													1	117.053	8.50777e-159	240.85
332	A0A172Q3A0	Fibroblast activation protein (Fragment)								KBD Unique	None	None	0	2	1				111700000		22124000		933810000			66912000		1	240.845	3.21193e-109	271.65	209.87	240.85													1	271.651	3.21193e-109	271.65
333	A6NL68	Solute carrier family 2, facilitated glucose transporter member 1 (Fragment)	SLC2A1			16.3602	0.000444887			CK Unique	Up	OA Unique	3	0	3	89549000	87845000	118690000				1487600000	1898900000	1457500000	9.86947e+07		1.61467e+09	1	163.507	2.82393e-40	227.94	204.62	163.51	1	121.041	0.000227784	121.04	1	227.196	3.15959e-40	227.2	1	93.3481	2.88491e-40	227.81
334	F5GXS0	Complement C4-B	C4B	1.61508	0.576125	9.09003	0.0346193	0.177676	0.117906	None	Up	None	3	2	3	141590000	151580000	65700000	343930000		42473000	510440000	1197300000	1554400000	1.19623e+08	193201500	1087380000	1	225.966	0	350.9	299.45	225.97	1	141.581	1.9296e-15	182.02	1	63.0912	0	350.9	1	213.734	8.15648e-30	213.73	1	350.427	0	350.43
335	F5GXS0	Complement C4-B	C4B	4.23894	0.138167	27.7671	0.00438021	0.15266	0.00859963	None	Up	Down	3	3	3	22551000	76215000	23453000	310120000	90869000	117090000	925690000	1504600000	963380000	4.07397e+07	172693000	1.13122e+09	1	172.981	2.43031e-05	172.98	148.06	172.98	1	114.513	0.00131352	114.51	1	172.981	4.88129e-05	172.98	1	131.454	4.04416e-05	131.45	1	144.77	3.2625e-05	144.77
336	A0A0G2JMB2	Immunoglobulin heavy constant alpha 2 (Fragment)	IGHA2							None	None	None	0	1	0				37206000									1	113.261	1.01481e-05	113.26	104.87	113.26													1	113.261	1.01481e-05	113.26
337	A0A286YEY5	Immunoglobulin heavy constant alpha 2 (Fragment)	IGHA2	6.21961	0.0981756	29.4049	0.126974	0.211516	0.19597	None	None	None	3	3	3	13087000	47569000	5471800	218650000	40519000	152120000	297610000	1298500000	348370000	22042600	1.37096e+08	648160000	1	172.233	3.40403e-05	193.38	142.31	172.23	1	133.134	0.00184573	133.13	1	189.38	6.66759e-05	189.38	1	125.817	0.00195153	125.82	1	193.379	3.40403e-05	193.38
338	B4E2U4	cDNA FLJ52115, highly similar to HLA class II histocompatibility antigen, DRalpha chain				4.38905	0.112303			CK Unique	None	OA Unique	2	0	2	11266000		14034000				39859000		71184000	12650000		55521500	1	77.0577	0.0171426	91.626	26.374	77.058	1	75.8543	0.025479	75.854					1	91.6263	0.0171426	91.626
339	B4E2U4	cDNA FLJ52115, highly similar to HLA class II histocompatibility antigen, DRalpha chain								None	None	None	0	1	1				263830000				347280000					1	105.165	0.00464483	105.17	75.995	105.17													1	66.5955	0.0467056	66.595
340	B4E2U4	cDNA FLJ52115, highly similar to HLA class II histocompatibility antigen, DRalpha chain								None	None	None	0	1	0				78359000									0.916037	10.3783	2.69099e-06	113.3	97.986	113.3													0.916037	10.3783	2.69099e-06	113.3
341	Q8NF80	FLJ00275 protein (Fragment)	FLJ00275							None	None	None	0	1	0				9568400									1	116.721	1.54145e-13	116.72	98.162	116.72													1	116.721	1.54145e-13	116.72
342	A0A0H3WBE8	Thrombospondin receptor (Fragment)	CD36							None	OA Unique	OA Unique	0	0	3							105040000	250370000	294470000			2.16627e+08	1	172.843	6.2931e-55	223.06	196.79	223.06
343	B4DQA0	L-selectin								None	None	None	0	0	1								35806000					1	223.413	2.87821e-28	225.01	197.88	225.01
344	A0A0J9YVX1	Sortilin (Fragment)	SORT1							None	None	None	0	0	0													0.856249	7.7499	0.0117075	86.898	57.94	86.898
345	D6RD48	Claudin domain-containing protein 1 (Fragment)	CLDND1							None	None	None	0	1	1				11653000					63563000				1	110.73	1.10293e-287	280.38	223.66	280.38													0.999958	43.8108	7.15622e-06	153.95
346	D6RD48	Claudin domain-containing protein 1 (Fragment)	CLDND1							None	None	None	1	1	1		3688000		11711000					63549000				1	117.036	7.62324e-13	155.75	123.28	117.04					1	114.281	0.00492216	114.28					1	155.754	0.00294068	155.75
347	A0A0S2Z3H6	Cleft lip and palate associated transmembrane protein 1 isoform 1 (Fragment)	CLPTM1							None	None	None	0	1	1				37367000				133970000					1	128.463	7.08086e-14	153.95	133.17	128.46													1	153.946	7.08086e-14	153.95
348	A0A0S2Z3X0	Hexosaminidase A isoform 2	HEXA	1.89197	0.136384	9.25913	0.0145646	0.204335	0.0214696	None	Up	Down	3	3	3	82169000	40279000	29413000	132040000	75377000	79899000	399380000	666000000	340720000	5.06203e+07	95772000	468700000	1	149.816	0.000280211	166.16	96.337	149.82	1	144.089	0.00116972	144.09	1	120.155	0.000750831	120.15	1	98.0331	0.0107842	98.033	1	166.161	0.00168393	166.16
349	B5A959	Soluble FGFR1 variant 2	FGFR1							KBD Unique	None	KBD Unique	0	3	0				19084000	16722000	12029000					15945000		1	92.8379	0.00325805	168.27	119.7	92.838													1	144.089	0.00325805	144.09
350	B4DWE0	cDNA FLJ50260, highly similar to Cytochrome b-245 heavy chain								None	None	None	0	0	0													1	159.193	1.94021e-33	159.19	135.39	159.19													1	136.203	1.01438e-18	136.2
351	B4DWE0	cDNA FLJ50260, highly similar to Cytochrome b-245 heavy chain								KBD Unique	None	KBD Unique	0	2	0				33571000		8637900					21104450		1	170.566	3.99915e-07	196.95	147.53	196.95													1	170.566	3.99915e-07	196.95
352	B4DWE0	cDNA FLJ50260, highly similar to Cytochrome b-245 heavy chain								None	None	None	0	0	0													0.941451	12.0627	0.000123424	101.2	80.992	101.2													0.941451	12.0627	0.000123424	101.2
353	B4DVE1	cDNA FLJ53478, highly similar to Galectin-3-binding protein								KBD Unique	None	KBD Unique	0	2	0				81882000		32356000					57119000		1	70.9415	0.00559636	93.258	74.946	70.942													1	93.2576	0.00559636	93.258
354	B4DVE1	cDNA FLJ53478, highly similar to Galectin-3-binding protein						0.70405	0.565061	KBD Unique	OA Unique	None	0	3	3				136290000	45501000	112430000	44498000	250270000	123130000		9.80737e+07	1.39299e+08	1	140.483	7.97112e-78	253.71	199.29	140.48													1	253.71	7.97112e-78	253.71
355	B4DVE1	cDNA FLJ53478, highly similar to Galectin-3-binding protein						0.408307	0.0955864	KBD Unique	OA Unique	None	0	3	2				109320000	29238000	37941000		162380000	125800000		58833000	144090000	1	105.975	0.000104072	123.86	98.969	105.98													1	120.683	0.000481564	120.68
356	B4DVE1	cDNA FLJ53478, highly similar to Galectin-3-binding protein								None	None	None	0	0	0													1	182.572	2.72197e-73	182.57	166.43	182.57													1	182.572	2.72197e-73	182.57
357	B4DVE1	cDNA FLJ53478, highly similar to Galectin-3-binding protein								KBD Unique	None	KBD Unique	0	2	0				71608000		157060000					114334000		1	178.842	9.23727e-43	178.84	133.68	178.84													1	146.162	4.10775e-06	146.16
358	A0A2R8Y5L4	Epsilon-sarcoglycan (Fragment)	SGCE							None	None	None	0	1	0				13837000									1	67.1885	1.20199e-05	137.17	89.344	137.17	0.999969	45.1514	0.0448963	68.069									1	67.1885	1.20199e-05	137.17
359	Q53GU8	Transforming growth factor, beta-induced, 68kDa variant (Fragment)								None	None	None	0	1	0				49823000									1	152.939	2.8901e-14	152.94	118.25	152.94													1	152.939	2.8901e-14	152.94
360	E5RFZ8	Zinc transporter ZIP14 (Fragment)	SLC39A14	4.29292	0.0415269					Up	CK Unique	KBD Unique	2	3	0		31086000	35040000	139670000	185560000	100580000				33063000	1.41937e+08		1	252.824	5.35043e-202	252.82	205.83	252.82	1	117.673	0.00094667	117.67	1	104.434	0.00193775	104.43	1	93.2576	0.00237842	93.258	1	134.749	1.47868e-05	134.75
361	D6REA1	Nucleotide exchange factor SIL1	SIL1	0.281525	0.111531					None	CK Unique	KBD Unique	3	2	0	18926000	46973000	37986000	13996000		5501500				3.46283e+07	9748750		1	129.702	2.37709e-15	176.48	157.51	129.7	1	104.221	0.00443955	104.22	1	160.769	3.3587e-05	160.77	1	176.484	2.85217e-05	176.48	1	99.9731	0.00509038	99.973
362	A0A0U1RQT9	Synaptophysin-like protein 1 (Fragment)	SYPL1							CK Unique	CK Unique	None	3	0	0	13527000	26217000	22374000							20706000			0.999988	49.3394	3.88547e-21	178.22	148.92	178.22	0.999988	49.3394	3.88547e-21	178.22	0.99982	37.4357	0.000268622	105.95	0.999717	35.4862	0.00202315	83.53
363	A0A0U1RQT9	Synaptophysin-like protein 1 (Fragment)	SYPL1							None	None	None	1	1	3			193480000	174590000			765880000	1089000000	683120000			846000000	0.999962	44.2479	2.51799e-104	255.91	224.25	216.34									0.995567	23.5138	6.26433e-46	207.72	0.999802	37.0314	2.81531e-90	244.56
364	A0A2R8Y5Q7	Natural resistance-associated macrophage protein 2 (Fragment)	SLC11A2							None	None	None	0	0	0													0.99993	41.5349	0.0123067	55.127	40.817	55.127													0.99993	41.5349	0.0123067	55.127
365	A0A140T9H1	HLA class II histocompatibility antigen, DP alpha 1 chain (Fragment)	HLA-DPA1							KBD Unique	None	KBD Unique	0	2	0				40126000		16854000					28490000		0.999999	60.1324	3.81003e-07	120.9	114.78	120.9													0.999999	60.1324	3.81003e-07	120.9
366	A0A2K9UYS7	MHC class II antigen	HLA-DPA1							KBD Unique	None	KBD Unique	0	2	0				7573900		15138000					11355950		0.992593	21.2715	0.00575473	67.43	61.535	67.43													0.992593	21.2715	0.00575473	67.43
367	A0A140T9K6	Atypical chemokine receptor 3 (Fragment)	ACKR3							None	OA Unique	None	0	1	2				4728400			15399000	90149000				52774000	0.99472	22.7509	1.44178e-51	236.06	224.46	236.06													0.914834	10.3108	0.00111587	114.83
368	Q16610	Extracellular matrix protein 1 (Secretory component p85)	ECM1	3.64012	0.242848	27.2461	0.111196	0.133601	0.0618039	None	None	None	2	3	3		39318000	6664600	132340000	26031000	92702000	235440000	948310000	695520000	22991300	83691000	6.26423e+08	1	69.5777	3.42668e-06	171.67	146.23	69.578					1	96.7446	0.00247105	96.745	1	83.3141	0.00470809	83.314	1	71.8061	0.00419619	84.718
369	Q16610	Extracellular matrix protein 1 (Secretory component p85)	ECM1							None	None	None	0	1	1				37928000				287260000					0.977491	16.3775	0.000948089	156.18	128.92	104.43													0.5	0	0.0355229	48.284
370	A0A140VJJ6	Testicular tissue protein Li 70		285.22	0.113304	87.8759	0.376769	3.24572	0.2992	None	None	None	3	3	3	57974000	169050000	27678000	43668000000	2503200000	26475000000	40277000	22311000000	30902000	8.49007e+07	24215400000	7.46073e+09	1	145.915	0	421.93	380.71	145.91	1	251.376	3.92802e-81	251.38	1	330.104	3.47172e-267	330.1	1	197.72	4.86034e-30	197.72	1	227.799	0	421.93
371	A0A140VJJ6	Testicular tissue protein Li 70								KBD Unique	None	KBD Unique	0	2	0				100930000		28937000					64933500		0.996658	26.7653	1.04119e-12	199.11	184.48	147.75													0.987423	20.8908	1.04119e-12	199.11
372	B4E0H8	cDNA FLJ60385, highly similar to Integrin alpha-3								None	None	None	0	1	1				5253800				40093000					1	123.883	0.000101716	123.88	94.938	123.88													1	96.8898	0.00556273	96.89
373	A0A140VJU8	Superoxide dismutase [Cu-Zn] (EC 1.15.1.1)		0.240507	0.021327	4.21728	0.00384911	0.0570288	0.00268201	Down	Up	Down	3	3	2	2582100000	3171700000	2157500000	1552400000	162960000	187360000		12420000000	9822800000	2637100000	634240000	11121400000	1	255.079	2.2167e-127	267.93	251.79	255.08	1	51.2109	4.67264e-120	267.93	1	143.459	4.34103e-104	255.85	1	266.893	6.28647e-120	266.89	1	246.859	3.42498e-90	246.86
374	A0A140VJW3	Sushi domain containing 2, isoform CRA_a (Testicular tissue protein Li 190)	SUSD2 hCG_2043017							KBD Unique	None	KBD Unique	0	3	0				21644000	8508000	12484000					14212000		1	69.9792	0.00534631	94.616	67.501	69.979													1	94.6162	0.00534631	94.616
375	A0JLQ0	AZGP1 protein (Fragment)	AZGP1							None	None	None	0	0	1								77089000					0.578221	1.37008	0.00341405	80.859	71.675	80.859
376	A0JLQ0	AZGP1 protein (Fragment)	AZGP1							None	None	None	0	0	1									202490000				0.998245	27.5497	5.18475e-21	162.4	128.46	162.4
377	A0JLQ0	AZGP1 protein (Fragment)	AZGP1							None	None	None	0	0	1								67432000					0.669114	3.05821	0.00294249	120.46	96.302	120.46													0.593377	1.64138	0.0345474	81.548
378	A0A1B0GTU3	Kinesin-like protein KIF16B	KIF16B							None	None	None	0	0	1							327960000						0.906801	9.88102	0.0174166	69.451	22.571	69.451
380	A0A146E5L3	Mesenchymal stromal cell-and fibroblast-expressing Linx paralogue	Meflin							None	None	None	0	1	0				24740000									0.999949	42.9647	1.4621e-24	145.69	123.92	145.69													0.999949	42.9647	1.4621e-24	145.69
381	A0A146E5L3	Mesenchymal stromal cell-and fibroblast-expressing Linx paralogue	Meflin							None	None	None	0	1	1				218380000			174120000						1	80.2873	2.85388e-12	147.73	118.19	80.287													1	147.732	2.85388e-12	147.73
382	B4E278	cDNA FLJ55571, highly similar to Sad1/unc-84 protein-like 1								None	None	None	0	1	0				13037000									1	72.6522	0.00152501	164.33	89.226	72.652													1	164.335	0.00152501	164.33
383	B4E278	cDNA FLJ55571, highly similar to Sad1/unc-84 protein-like 1								None	None	None	0	1	0				33712000									1	100.878	0.00455676	100.88	69.506	100.88													1	100.878	0.00455676	100.88
384	B4DPY4	cDNA FLJ54272, highly similar to Complement decay-accelerating factor				24.0709	0.00143658			None	Up	None	3	1	3	16481000	100740000	56167000	218570000			1267000000	1724700000	1181900000	57796000		1391200000	1	347.758	1.11309e-297	347.76	330.39	347.76	1	125.74	0.000195416	125.74	1	170.022	1.9516e-08	170.02	1	151.074	7.10281e-09	151.07	1	244.265	2.18819e-64	244.27
385	A0A182DWH8	Selenoprotein P (Fragment)	SELENOP							None	OA Unique	None	0	1	3				34882000			96552000	96525000	69157000			8.74113e+07	1	116.704	6.56719e-29	166.57	146.2	166.57													0.999769	36.3588	0.0359908	48.315
386	A0A182DWH8	Selenoprotein P (Fragment)	SELENOP							None	None	None	0	1	0				7651100									0.999951	43.0696	0.00820518	57.922	51.199	57.922													0.999951	43.0696	0.00820518	57.922
387	Q9H9K4	cDNA FLJ12685 fis, clone NT2RM4002493								None	None	None	0	1	0				26716000									1	64.6401	0.0149399	81.017	40.52	64.64													1	81.0165	0.0193078	81.017
388	A0A1B0GV06	Acid ceramidase (Fragment)	ASAH1							None	None	None	0	1	0				8534200									1	68.4198	0.00460448	68.42	60.523	68.42													1	68.4198	0.00460448	68.42
389	A0A1B0GV06	Acid ceramidase (Fragment)	ASAH1	1.6014	0.446185					None	None	None	3	2	1	25031000	45289000	20906000	73531000		23862000		320940000		3.04087e+07	48696500		1	147.368	1.78577e-32	166.14	134.21	147.37	1	152.621	7.15564e-09	152.62	1	134.749	1.90788e-06	134.75	1	141.879	1.65643e-07	141.88	1	128.283	0.000130713	128.28
390	A0A1B0GTY3	A disintegrin and metalloproteinase with thrombospondin motifs 2	ADAMTS2							None	None	None	0	1	0				4096900									1	70.4884	0.0143456	70.488	55.287	70.488													1	46.5921	0.0405944	46.592
391	F8WD96	Cathepsin D	CTSD			9.0564	0.0189299			None	Up	None	3	1	2	263440000	109840000	72957000			232780000	1015200000	1679000000		1.48746e+08		1347100000	1	98.044	0.000927114	144.77	63.474	98.044	1	117.312	0.00108827	117.31	1	98.0483	0.0107751	98.048	1	90.6956	0.0135905	90.696
392	A0A1B0RPQ5	Anosmin-1 (EC 3.4.21.4)	ANOS1	0.238187	0.0386172	5.6881	0.0299023	0.0418747	0.0176826	Down	Up	Down	3	3	3	177560000	93930000	87463000	30820000	14009000	40669000	448890000	587070000	1005800000	119651000	2.84993e+07	6.80587e+08	1	194.501	3.82297e-41	230.41	198.57	194.5	1	215.502	1.48659e-24	215.5	1	230.412	3.82297e-41	230.41	1	203.828	1.59055e-17	203.83	1	203.828	1.59055e-17	203.83
393	A0A1B0RPQ5	Anosmin-1 (EC 3.4.21.4)	ANOS1							None	None	KBD Unique	1	3	0	29432000			13260000	9768900	12924000					11984300		1	141.48	6.95486e-10	141.48	100.76	141.48	1	82.7494	0.0078432	82.749	1	69.5982	0.0184558	69.598	1	89.0474	0.0052827	89.047	1	50.2923	0.0327561	50.292
394	A0A1B1SMR9	Collagen type IX alpha 1	COL9A1					0.214287	0.121479	None	None	None	1	2	2			144970000	398270000		141370000	1617200000	901100000			269820000	1259150000	1	216.821	8.61691e-240	312.74	290.62	216.82					1	86.0796	2.26102e-07	86.08	1	275.2	6.27675e-151	275.2	1	312.743	8.61691e-240	312.74
395	A0A1B1SMR9	Collagen type IX alpha 1	COL9A1							None	None	None	0	1	0						10006000							0.999645	34.4971	0.0108525	112.17	65.104	112.17
396	A0A1I9LHJ2	Sulfotransferase (EC 2.8.2.-)	CHST6			28.7465	0.00547929			None	Up	None	2	1	3		10195000	8248500	9167500			281870000	211440000	301970000	9221750		2.65093e+08	1	100.552	9.74074e-79	265.06	225.41	250.47	0.999804	37.0861	0.00728814	96.331	1	63.4704	0.00100206	137.14	0.999993	51.2575	0.000320589	124.92	0.999393	32.1669	0.00750244	103.55
397	A0A1I9LHJ2	Sulfotransferase (EC 2.8.2.-)	CHST6							None	None	None	0	0	0													1	89.1886	0.00930709	89.189	49.404	89.189									1	89.1886	0.00930709	89.189
398	A0A1S5UZ16	Target of Nesh-SH3	ABI3BP							None	None	None	0	1	0						18667000							1	96.7902	5.31368e-13	106.03	98.033	96.79					1	65.7837	0.00256447	65.784
399	A0A1S5UZ16	Target of Nesh-SH3	ABI3BP	4.1414	0.0291322	3.94815	0.0336446	1.04895	0.893911	Up	Up	None	3	3	2	162490000	141350000	43586000	673210000	443580000	322040000	562500000		351960000	1.15809e+08	479610000	457230000	1	75.692	0.0210595	95.531	77.764	75.692	1	93.1955	0.0219156	93.195	1	86.095	0.0254278	86.095	1	84.5678	0.0270026	84.568	1	82.2405	0.0294024	82.241
400	A0A1S5UZ16	Target of Nesh-SH3	ABI3BP	1.64602	0.343488	16.6008	0.0082904	0.0991535	0.00162074	None	Up	Down	2	3	3	28475000	52267000		98954000	44004000	56397000	528690000	797170000	684710000	40371000	6.64517e+07	670190000	1	130.412	2.14573e-05	150.61	127.18	130.41	1	85.8209	0.00681593	85.821	1	84.6583	0.00804555	84.658					1	107.555	0.00361832	107.55
401	A0A1S5UZ16	Target of Nesh-SH3	ABI3BP							None	None	None	0	0	1								50344000					1	174.589	3.37414e-39	174.59	163.48	174.59
402	A0A1S5UZ16	Target of Nesh-SH3	ABI3BP			8.27885	0.0097053			None	Up	None	2	1	3	253370000		125370000	914120000			1911000000	1471500000	1320800000	189370000		1.56777e+09	1	64.3937	7.87538e-27	229.33	191.01	64.394	1	48.091	0.0318012	48.091	1	74.165	0.020486	74.165	1	64.3937	2.30603e-21	195.88	1	85.7159	5.2035e-05	191.17
403	A0A1S5UZ16	Target of Nesh-SH3	ABI3BP	1.91877	0.0456595	16.4177	0.000421949	0.116872	0.00710872	None	Up	Down	3	2	2	56894000	55470000	40791000		81113000	114800000	898590000		777710000	5.10517e+07	97956500	838150000	1	86.6425	1.23333e-49	167.78	134.23	167	1	65.0133	2.86975e-11	120.6	1	85.1184	1.23333e-49	167.78	0.99997	45.1868	7.20834e-08	111.2	1	86.6425	1.66074e-49	167
404	A0A1S5UZ16	Target of Nesh-SH3	ABI3BP	1.91877	0.0456595	16.4177	0.000421949	0.116872	0.00710872	None	Up	Down	3	2	2	56894000	55470000	40791000		81113000	114800000	898590000		777710000	5.10517e+07	97956500	838150000	0.9997	35.2227	1.23333e-49	167.78	134.23	140.57	0.99898	29.9096	2.86975e-11	120.6	0.99765	26.2784	1.23333e-49	167.78	0.975186	15.9438	7.20834e-08	111.2	0.99761	26.2059	1.66074e-49	167
405	A0A1S5UZ16	Target of Nesh-SH3	ABI3BP	4.90519	0.245655	57.0958	0.00177494	0.0859115	0.00362726	None	Up	Down	3	3	2	343470000	27149000	16756000	1236100000	6517200	657530000	8266900000		6478100000	129125000	633382400	7372500000	1	206.363	3.34744e-44	215.85	150.54	206.36	1	84.1976	8.25826e-09	149.41	1	178.713	3.34744e-44	194.29	1	135.018	0.000196183	135.02	1	76.3572	5.13945e-23	212.9
406	B4DLJ6	cDNA FLJ56989, highly similar to Macrophage receptor MARCO		3.19911	0.209751	29.8126	0.0432862	0.107307	0.0163877	None	Up	Down	2	3	3		17121000	4774700	57271000	22277000	25522000	468480000	278830000	231840000	10947850	3.50233e+07	3.26383e+08	1	143.927	2.66261e-46	236.92	214.39	235.01					1	140.464	2.04241e-35	228.64	0.999999	59.4403	0.00651882	91.658	1	123.368	9.2583e-19	211.86
407	I2D5J2	Apolipoprotein M (Fragment)	APOM							None	None	None	0	0	1								72726000					1	211.445	3.79201e-57	211.45	200.72	211.45
408	Q6Q4G8	Neurominidase (Fragment)	NEU1							None	None	None	0	0	1								33026000					1	117.89	0.00101964	117.89	84.339	117.89
409	A0A1W2PNW4	Vascular endothelial growth factor receptor 1	FLT1							CK Unique	CK Unique	None	2	0	0	5522200	4013200								4767700			1	87.4761	0.0131499	88.948	71.562	87.476	1	76.0641	0.0250871	76.064	1	88.9479	0.0141715	88.948
410	A0A1W2PNW4	Vascular endothelial growth factor receptor 1	FLT1							CK Unique	None	None	3	0	1	10621000	13503000	9882400					108800000		1.13355e+07			1	130.993	1.39638e-15	151.1	139.79	151.1	1	81.035	0.000112941	106.35	1	95.0067	1.09683e-06	119.96	1	69.0001	0.000924834	96.208
411	A0A1W2PNW4	Vascular endothelial growth factor receptor 1	FLT1							None	None	None	0	0	0													1	68.4405	0.0127773	74.76	52.286	68.44
412	A0A1W2PNW4	Vascular endothelial growth factor receptor 1	FLT1							None	None	OA Unique	1	0	2	17897000							167300000	105830000			136565000	1	133.227	3.34257e-05	133.23	80.061	133.23	1	91.5493	0.00531192	91.549
413	P00533	Epidermal growth factor receptor (EC 2.7.10.1) (Proto-oncogene c-ErbB-1) (Receptor tyrosine-protein kinase erbB-1)	EGFR ERBB ERBB1 HER1							None	None	None	0	1	0				4316500									0.976603	16.2056	0.00531388	91.584	50.555	91.584													0.976603	16.2056	0.00531388	91.584
414	P00533	Epidermal growth factor receptor (EC 2.7.10.1) (Proto-oncogene c-ErbB-1) (Receptor tyrosine-protein kinase erbB-1)	EGFR ERBB ERBB1 HER1							None	None	None	0	1	0				12692000									0.5	0	3.74468e-14	146.36	121.97	136.38													0.5	0	3.84397e-12	146.36
415	P00533	Epidermal growth factor receptor (EC 2.7.10.1) (Proto-oncogene c-ErbB-1) (Receptor tyrosine-protein kinase erbB-1)	EGFR ERBB ERBB1 HER1							None	None	None	0	1	0				12692000									0.5	0	3.74468e-14	146.36	121.97	136.38													0.5	0	3.84397e-12	146.36
416	C1PHC3	CD44 molecule (Fragment)	CD44	7.33057	0.154314	74.8854	0.229505	0.0978904	0.151114	None	None	None	2	3	3		26661000	13088000	248160000	91364000	97550000	755830000	3000100000	709000000	19874500	1.45691e+08	1488310000	1	82.8505	1.49538e-17	204	185.28	82.85					1	95.0939	0.00375277	95.094	1	89.1886	0.00376053	89.189	1	104.593	3.09434e-09	173.04
417	C8KHU1	Equilibrative nucleoside transporter 1 (Fragment)	SLC29A1							None	OA Unique	None	0	1	3				407690000			827680000	1753800000	967180000			1.18289e+09	1	309.582	0	309.58	277.99	309.58													1	103.296	1.91482e-106	236.92
418	Q86TT2	Full-length cDNA clone CS0DI019YF20 of Placenta of Homo sapiens (human) (Fragment)		3.97655	0.38239	111.236	0.17118	0.0357489	0.180827	None	None	None	3	3	3	64672000	52412000	131910000	830910000	57177000	102050000	477310000	19360000000	7859700000	82998000	3.30046e+08	9.23234e+09	1	176.087	2.27943e-20	224.51	95.115	176.09	1	121.048	0.00278786	121.05	1	166.296	0.00386131	166.3	1	160.106	0.00375501	160.11	1	211.347	5.11702e-13	211.35
419	Q8NF17	FLJ00385 protein (Fragment)	FLJ00385	2.04559	0.430269	12.0274	0.113922	0.170077	0.146374	None	None	None	3	3	3	904710000	3653000000	810980000	7265100000	708120000	3008900000	6896400000	39981000000	17694000000	1.78956e+09	3.66071e+09	21523800000	1	82.7505	3.61951e-261	314.98	270.53	82.75	1	172.213	0.0034069	172.21	1	81.5478	0.00283314	175.12	1	111.947	0.00188702	130.28	1	314.979	3.61951e-261	314.98
420	A0A286YEY5	Immunoglobulin heavy constant alpha 2 (Fragment)	IGHA2							None	None	None	1	2	1		33741000		28264000	9323400			863990000			18793700		1	218.397	4.94444e-148	295.32	261.36	218.4					1	159.519	1.03838e-09	159.52					1	141.464	4.94444e-148	295.32
421	E9PIA8	Palmitoyl-protein thioesterase 1 (Fragment)	PPT1							None	None	None	0	0	0													1	218.159	1.54473e-137	218.16	192.44	218.16
422	E9PIA8	Palmitoyl-protein thioesterase 1 (Fragment)	PPT1							None	None	None	0	0	1									185890000				1	108.238	0.0248414	108.24	43.462	108.24
424	A0A2P9AT05	Uncharacterized protein	BQ8482_400015							None	None	None	0	0	0													0.999999	62.2283	0.0093217	63.292	38.106	63.292
425	A0A2P9AUM2	D-amino acid dehydrogenase 3 small subunit (EC 1.4.99.6)	dadA BQ8482_520005							None	OA Unique	OA Unique	0	0	3							73663000	79789000	103720000			85724000	0.5	0	0.0115664	82.279	39.41	74.301
426	A0A2P9AUM2	D-amino acid dehydrogenase 3 small subunit (EC 1.4.99.6)	dadA BQ8482_520005							None	OA Unique	OA Unique	0	0	3							73663000	79789000	103720000			85724000	0.5	0	0.0115664	82.279	39.41	74.301
427	B4DPP0	cDNA FLJ51032, highly similar to CD9 antigen								None	None	KBD Unique	1	3	0			22955000	55916000	49011000	45858000					5.02617e+07		1	164.649	1.03194e-65	184.95	168.89	164.65									1	128.381	6.09911e-15	128.38	1	184.954	2.23577e-53	184.95
428	A0A2R8Y484	Leukocyte surface antigen CD47 (Fragment)	CD47			16.1121	0.000126521			None	Up	None	3	1	3	81403000	88112000	65737000	205810000			1275600000	1396700000	1118100000	7.84173e+07		1.26347e+09	1	122.329	3.4043e-05	136.21	105.64	122.33	1	82.2868	0.0442355	82.287	1	105.935	0.00415455	105.94	1	105.358	0.00426541	105.36	1	115.714	0.00107114	115.71
429	A0A2R8Y484	Leukocyte surface antigen CD47 (Fragment)	CD47							None	None	None	0	0	1								109390000					1	106.4	0.00523226	106.4	87.129	106.4					1	106.4	0.00557465	106.4					1	93.1105	0.00821047	93.111
430	A0A2R8Y484	Leukocyte surface antigen CD47 (Fragment)	CD47	1.32922	0.663019	14.09	0.00380358	0.0943378	0.00497735	None	Up	Down	3	3	3	119330000	133100000	99473000	296150000	13395000	158210000	1634000000	2102300000	1222000000	117301000	1.55918e+08	1.65277e+09	1	51.6838	0	383.07	357.72	51.684	1	278.077	4.05784e-138	278.08	1	51.2109	7.04851e-121	269.9	1	260.112	5.31551e-105	260.11	1	190.858	2.27699e-104	254.71
431	A0A2R8YCX5	Semaphorin-3E	SEMA3E							None	None	None	0	0	0													0.999924	41.1663	0.0173163	116	53.283	116
432	A0A2R8YCX5	Semaphorin-3E	SEMA3E							CK Unique	CK Unique	None	2	0	0	26281000	30348000								28314500			0.947693	12.5811	1.51698e-15	140.63	127.57	140.63	0.947693	12.5811	1.51698e-15	140.63	0.912215	10.1668	0.00159768	85.224
433	A0A2R8YGD1	Tripeptidyl-peptidase 1	TPP1							None	None	None	0	1	0				18400000									1	57.4102	7.50122e-06	112.74	96.794	57.41													1	112.737	7.50122e-06	112.74
434	A0A2R8YGD1	Tripeptidyl-peptidase 1	TPP1							None	None	None	0	1	0				22317000									1	163.577	1.22131e-136	241.02	233.58	241.02													1	163.577	1.22131e-136	241.02
435	A0A2R8YGD1	Tripeptidyl-peptidase 1	TPP1							None	None	None	0	1	0				22317000									0.5	0	1.22131e-136	241.02	233.58	241.02													0.5	0	1.22131e-136	241.02
436	A0A2R8YGD1	Tripeptidyl-peptidase 1	TPP1							None	None	None	0	1	0				22317000									0.5	0	1.22131e-136	241.02	233.58	241.02													0.5	0	1.22131e-136	241.02
437	E9PNW4	UPAR/Ly6 domain-containing protein		0.847167	0.782302	9.15334	0.127213	0.0925527	0.125565	None	None	None	2	2	2		217880000	186770000	268190000		74616000		2504100000	1199800000	202325000	171403000	1851950000	1	138.02	4.79805e-89	210.34	177.11	138.02	1	202.922	4.79805e-89	202.92	1	82.5155	9.50733e-19	195.1	1	130.068	2.40963e-14	157.67	1	72.4959	2.99331e-63	210.34
438	G3V4V7	Corticosteroid-binding globulin (Fragment)	SERPINA6			28.5535	0.104791			None	None	None	2	1	2		20620000	17714000	31157000				733180000	361390000	19167000		547285000	1	214.26	6.24035e-24	214.26	184.01	214.26					1	191.044	9.44205e-13	191.04	1	150.056	1.74497e-09	150.06	1	188.06	1.92194e-11	188.06
439	Q5UGI6	Serine/cysteine proteinase inhibitor clade G member 1 splice variant 2 (Fragment)	SERPING1			23.1333	0.0186746			None	Up	None	3	1	3	37164000	146160000	53097000	270420000			1065200000	2636900000	1767100000	78807000		1.82307e+09	1	157.209	0.00322242	157.21	112.49	157.21	1	117.097	0.00772363	117.1	1	93.5608	0.0217817	93.561	1	141.827	0.0032287	141.83	1	120.621	0.00639388	120.62
440	Q5UGI6	Serine/cysteine proteinase inhibitor clade G member 1 splice variant 2 (Fragment)	SERPING1	2.08602	0.442532					None	None	None	3	2	1	37190000	89182000	43665000	207430000		29037000			2259300000	56679000	118233500		0.999994	52.3132	0	391.76	353.52	337.89	0.989898	19.9117	1.35678e-200	303.36	0.997227	25.558	9.67593e-281	334.79	0.998061	27.1154	4.63711e-225	310.57	0.999962	44.2213	0	391.76
441	A0A384MDM4	Epididymis secretory sperm binding protein		42.5122	0.243375					None	None	None	3	2	1	13499000	28731000	29485000	1935500000		97009000	1173700000			23905000	1016254500		1	241.555	8.8439e-68	241.56	232.96	241.56	1	66.7057	0.0145604	66.706	1	145.52	1.4454e-14	145.52	1	66.9887	0.0294362	66.989	1	65.1792	4.97666e-30	198.74
442	A0A384MDM4	Epididymis secretory sperm binding protein								None	None	None	0	0	0													1	77.6404	0.0114591	77.64	59.329	77.64													1	77.6404	0.0114591	77.64
443	A0A384MDM4	Epididymis secretory sperm binding protein								None	None	None	0	1	1				105240000				47942000					1	179.947	1.10999e-46	209.9	209.9	179.95													1	92.9925	3.13223e-32	187.06
444	A0A384MDM4	Epididymis secretory sperm binding protein								None	None	None	0	1	0				7673800									1	85.2117	0.00242985	145.16	140.58	85.212													1	145.156	0.00242985	145.16
445	A0A384MDM4	Epididymis secretory sperm binding protein		18.966	0.42867	34.8609	0.0527372	0.544047	0.428696	None	None	None	2	2	3		25964000	22790000	907190000		17476000	1260300000	655870000	633240000	24377000	462333000	8.49803e+08	1	175.514	1.41694e-26	225.4	221.47	175.51					1	85.8618	0.0228582	85.862	1	68.625	0.0415433	68.625	1	218.548	2.69694e-19	218.55
446	A0A384MDM4	Epididymis secretory sperm binding protein								None	OA Unique	None	0	1	3				1536000000			487500000	917070000	521520000			642030000	1	92.7735	1.5955e-86	230.5	217.53	194.13													1	84.4271	1.53626e-53	215.96
447	A0A384MDM4	Epididymis secretory sperm binding protein								None	OA Unique	None	0	1	3				1536000000			487500000	917070000	521520000			642030000	1	203.418	1.5955e-86	230.5	217.53	212.24													1	206.911	1.53626e-53	215.96
448	A0A384MDM4	Epididymis secretory sperm binding protein		23.1027	0.197578	42.3977	0.00526255	0.544904	0.298578	None	Up	None	3	3	3	171880000	164610000	145020000	8254700000	849160000	2020300000	7685400000	8305600000	4423900000	1.60503e+08	3.70805e+09	6.80497e+09	1	199.333	1.36826e-32	224.75	190.86	199.33	1	152.696	1.6025e-09	152.7	1	157.378	2.12341e-09	157.38	1	195.511	2.953e-13	195.51	1	202.559	2.28938e-17	202.56
449	A0A384MDP3	Epididymis secretory sperm binding protein								None	None	OA Unique	1	0	3		3864900					9791600	14463000	16156000			13470200	1	119.018	2.65838e-69	207.39	181.1	119.02					1	67.4165	7.36948e-43	144.97					1	52.5225	0.00942231	52.522
450	A0A384MDP3	Epididymis secretory sperm binding protein		6.64036	0.201604	52.8619	0.000121997	0.125617	0.000818533	None	Up	Down	3	3	3	92821000	97979000	81640000	1269600000	202600000	336900000	4179500000	4987500000	5234700000	9.08133e+07	6.03033e+08	4.80057e+09	1	58.0727	0	387.96	359.78	58.073	1	355.056	0	355.06	1	189.071	4.01168e-86	259.75	1	387.958	0	387.96	1	58.0727	0	354.38
451	A0A384MDP3	Epididymis secretory sperm binding protein		4.85007	0.370168	10.0552	0.0525343	0.482344	0.360479	None	None	None	3	3	3	30068000	48009000	19376000	404770000	25624000	42260000	505680000	340170000	134060000	3.24843e+07	1.57551e+08	3.26637e+08	1	66.6332	9.16583e-165	274.11	262.71	66.633	1	199.46	7.24522e-63	199.46	1	48.6341	4.95877e-116	246.31	1	143.05	6.80976e-147	265.64	1	103.632	9.16583e-165	274.11
452	A0A384MDP3	Epididymis secretory sperm binding protein		8.10854	0.138628	55.6806	0.0297466	0.145626	0.0130839	None	Up	Down	2	3	3	61742000	29440000		617180000	274490000	217360000	1964400000	3521800000	2129400000	45591000	3.69677e+08	2.53853e+09	1	166.549	1.78985e-46	240.12	199.77	166.55	1	145.987	9.4465e-06	145.99	1	161.19	1.08836e-05	161.19	1	139.858	1.17703e-05	139.86	1	240.122	1.78985e-46	240.12
453	A0A3B3IUC0	Integral membrane protein 2B	ITM2B							None	CK Unique	None	2	1	0		68168000	43595000	13993000						55881500			1	116.546	2.00861e-12	150.94	138.17	116.55	1	125.74	3.86672e-09	125.74	1	150.942	2.00861e-12	150.94	1	125.217	3.83592e-05	125.22	1	116.546	0.000233081	116.55
454	A0A384MDV6	Carboxypeptidase Z, isoform CRA_b (Epididymis secretory sperm binding protein)	CPZ hCG_16447							KBD Unique	None	KBD Unique	0	2	0				5521900		19465000					12493450		0.999929	41.4603	1.03762e-07	88.551	66.33	88.551													0.998663	28.732	0.00369096	69.081
455	B4DNT6	cDNA FLJ53631, highly similar to Intercellular adhesion molecule 1		1.46064	0.282203					None	None	None	3	3	1	18427000	12752000	6347600	18113000	13052000	23648000		241750000		1.25089e+07	18271000		1	170.215	4.74197e-28	178.83	127.86	170.22	1	175.376	0.00278321	175.38	1	155.103	0.00281898	155.1	1	145.633	0.00241138	145.63	1	160.106	0.00375501	160.11
456	B4DNT6	cDNA FLJ53631, highly similar to Intercellular adhesion molecule 1		1.96755	0.225055	2.04328	0.0475741	0.962939	0.922799	None	Up	None	3	3	3	53884000	32144000	36362000	84155000	32164000	124490000	56396000	98485000	95196000	4.07967e+07	8.02697e+07	83359000	1	64.4386	0.000207486	131.09	126.47	64.439	1	112.845	0.00109086	112.85	1	121.608	0.000254316	121.61	1	127.514	0.000207486	127.51	1	131.087	0.00029918	131.09
457	B4DNT6	cDNA FLJ53631, highly similar to Intercellular adhesion molecule 1		0.57889	0.327518	10.8847	0.0140639	0.0531837	0.0435167	None	Up	Down	3	2	3	64664000	70637000	33687000		13895000	51322000	453110000	877430000	508850000	5.63293e+07	32608500	613130000	1	142.106	8.0575e-14	155.88	129.84	155.88	1	75.3058	0.00428227	80.69	1	78.5093	0.00329464	84.169	0.999999	62.0722	0.019858	67.456
460	P51884	Lumican (Keratan sulfate proteoglycan lumican) (KSPG lumican)	LUM LDC SLRR2D							None	None	None	1	1	1	11679000			27588000				1565700000					1	51.8878	7.77303e-21	161.32	145.38	51.888	1	51.5913	1.66651e-16	144.12	0.487529	2.2744	1.8551e-14	144.12	0.353985	0	3.5296e-05	110.22	1	51.8878	5.50916e-07	122.34
461	P51884	Lumican (Keratan sulfate proteoglycan lumican) (KSPG lumican)	LUM LDC SLRR2D							None	None	None	1	1	3	88603000			27588000			681620000	148290000	511540000			447150000	1	51.8878	7.50834e-17	144.33	137.9	51.888	1	51.5913	9.3714e-11	133.71					0.353985	0	3.5296e-05	110.22	1	51.8878	0.00108503	79.013
462	P51884	Lumican (Keratan sulfate proteoglycan lumican) (KSPG lumican)	LUM LDC SLRR2D	6.57146	0.00329764	35.2488	0.221174	0.186431	0.292306	Up	None	None	3	3	3	75671000	81936000	40317000	493460000	487900000	319290000	5424100000	454780000	1097700000	6.59747e+07	433550000	2.32553e+09	1	51.8878	1.592e-276	330.42	269.21	51.888	1	51.5913	1.45789e-146	288.25	0.984156	18.0333	9.30127e-276	300.33	0.988561	19.3679	1.66937e-80	244.88	1	51.8878	1.37774e-266	326.81
463	P51884	Lumican (Keratan sulfate proteoglycan lumican) (KSPG lumican)	LUM LDC SLRR2D	5.31532	0.0598992	3.86043	0.190926	1.37687	0.583645	None	None	None	3	3	3	763160000	712140000	358100000	1319700000	3720300000	4705100000	243510000	3966000000	2868200000	6.11133e+08	3.24837e+09	2.35924e+09	1	44.3907	0	429.76	395.76	44.391	1	136.655	2.18964e-65	230.29	1	44.3907	2.71402e-104	253.36	1	165.86	5.16692e-201	306	1	157.487	1.95189e-225	314.17
464	P51884	Lumican (Keratan sulfate proteoglycan lumican) (KSPG lumican)	LUM LDC SLRR2D							None	CK Unique	None	2	1	0		32148000	3073700		5574900					17610850			1	65.8978	4.28886e-30	123.72	69.626	123.72	0.972105	15.5886	0.00781091	43.579	1	65.8978	4.28886e-30	123.72	0.928413	11.1266	6.68159e-10	88.191
465	P51884	Lumican (Keratan sulfate proteoglycan lumican) (KSPG lumican)	LUM LDC SLRR2D	0.900333	0.755975	1.52043	0.0778259	0.592157	0.058644	None	None	None	3	3	3	1821100000	2795200000	1419100000	2357500000	934570000	2141800000	2716900000	3285100000	3174400000	2011800000	1811290000	3058800000	1	73.7551	3.5482e-103	222.95	159.86	123.72	0.999963	44.3768	4.43739e-65	173.95	1	73.7551	1.12152e-77	204.88	0.999987	48.8656	1.10626e-84	209.65	0.999983	47.582	2.64496e-94	221.73
466	D9IWP9	Beta-2-glycoprotein I (Fragment)				8.91298	0.0615673			None	None	None	3	1	3	159500000	202310000	149010000	152340000			747930000	2515200000	1289800000	1.70273e+08		1.51764e+09	1	72.4254	8.94918e-271	307.86	296.73	72.425	1	151.046	2.18899e-35	151.05	1	57.803	7.50699e-106	233.33	1	248.945	3.26095e-131	248.95	1	100.949	3.18036e-180	273.41
467	D9IWP9	Beta-2-glycoprotein I (Fragment)				8.91298	0.0615673			None	None	None	3	1	3	159500000	202310000	149010000	152340000			747930000	2515200000	1289800000	1.70273e+08		1.51764e+09	1	72.4254	8.94918e-271	307.86	296.73	72.425	1	151.046	2.18899e-35	151.05	1	57.803	7.50699e-106	233.33	1	248.945	3.26095e-131	248.95	1	100.949	3.18036e-180	273.41
468	D9IWP9	Beta-2-glycoprotein I (Fragment)		2.22544	0.498109	28.5185	0.0225478	0.078035	0.0275456	None	Up	Down	3	3	3	41479000	307810000	89703000	776510000	60271000	140170000	2022800000	5742000000	4754600000	1.46331e+08	3.2565e+08	4.17313e+09	1	128.811	2.7167e-18	212.21	198.3	128.81	1	185.295	4.33281e-06	185.29	1	84.1976	3.89666e-06	185.61	1	84.6583	2.10238e-05	177.78	1	212.21	2.7167e-18	212.21
469	D9IWP9	Beta-2-glycoprotein I (Fragment)		2.89749	0.145868	20.8387	0.141765	0.139044	0.0824494	None	None	None	2	3	3	124400000	292430000		889780000	387080000	534780000	1965300000	7425400000	3638600000	208415000	603880000	4343100000	0.999277	31.4059	1.3556e-32	187.97	170.76	148.62	0.995879	23.8317	1.097e-07	141.54	0.997708	26.3875	3.47164e-09	154.1	0.996779	24.9063	1.3556e-32	162.93	0.996921	25.102	2.47936e-18	173.72
470	A0A384NKS6	Clusterin		0.225464	0.0636611	3.09623	0.00150979	0.0728188	0.000139972	None	Up	Down	3	3	3	15773000000	41107000000	31411000000	16787000000	1368400000	1751000000	88614000000	87574000000	97181000000	2.94303e+10	6.63547e+09	91123000000	1	251.645	0	356.68	291.96	251.64	1	58.7431	3.62241e-26	230.73	1	90.1036	0	356.68	1	262.321	4.05723e-240	326.24	1	220.173	3.94393e-70	244.28
471	A0A384NKS6	Clusterin		0.321424	0.321387	0.505618	0.55896	0.635705	0.73612	None	None	None	3	3	3	107720000000	2500400000	44482000000	8580100000	25036000000	16109000000	28137000	77778000000	414240000	5.15675e+10	1.6575e+10	26073459000	1	62.1662	3.84757e-39	234.91	203.91	62.166	1	113.379	2.09149e-30	234.91	1	62.1662	5.02161e-05	165.78	1	79.3106	3.53104e-05	154.12	1	86.8328	1.88121e-10	214.81
472	A0A384NKS6	Clusterin		0.0799406	0.010042	1.50672	0.197883	0.0530559	0.0377291	Down	None	Down	3	2	3	1361200000	1788800000	1230100000	217360000		16072000	1654000000	1855100000	3090500000	1.46003e+09	116716000	2.19987e+09	1	144.151	4.7156e-150	276.34	264.54	144.15	1	45.3692	1.62146e-19	137.36	1	45.6957	4.50864e-76	225.37	1	276.336	4.7156e-150	276.34	1	154.073	2.06484e-31	154.07
473	A0A384NKS6	Clusterin		0.237166	0.00307997	1.48124	0.0167579	0.160113	0.000470532	Down	None	Down	3	3	3	98894000000	118390000000	88325000000	35860000000	7894000000	28726000000	139620000000	144990000000	168070000000	1.0187e+11	24160000000	1.50893e+11	1	69.3488	0	393.42	369.19	69.349	1	198.625	0	386.44	1	88.441	4.12148e-234	264.28	1	78.692	0	360.32	1	138.449	4.02587e-216	322.01
474	A0A384NKS6	Clusterin		0.164495	0.0317132	1.40556	0.211986	0.117031	0.000173862	Down	None	Down	3	3	3	2939900000	1951700000	1146400000	376140000	325760000	291320000	3058200000	2466600000	2962000000	2.01267e+09	3.31073e+08	2.82893e+09	1	215.775	0	423.1	373.98	250.46	1	206.531	0	384.67	1	297.65	0	423.1	1	273.07	0	346.63	1	253.668	1.4523e-251	319.91
475	A0A384NKS6	Clusterin								CK Unique	None	None	2	0	1	79069000		1787100000					85815000		933084500			1	79.3523	1.07585e-204	250.46	216.41	250.46	0.99998	46.911	1.96893e-48	162.37	0.99342	21.7875	0.0231651	61.212	0.654436	2.77549	0.0284515	58.158	0.5	0	1.83893e-08	110.98
476	A0A384NKS6	Clusterin								None	None	None	0	0	0													0.874291	8.4229	3.21401e-49	167.55	144.54	167.55									0.874291	8.4229	3.21401e-49	167.55	0.5	0	1.83893e-08	110.98
477	A0A384NKS6	Clusterin								CK Unique	CK Unique	None	2	0	0	2614500	4413900								3514200			1	83.5305	6.39615e-11	115.57	100.19	83.53	1	67.9969	6.39615e-11	115.57	1	83.5305	0.00236682	83.53
478	A0A384NKS6	Clusterin								CK Unique	CK Unique	None	2	0	0	2614500	4413900								3514200			1	83.5305	6.39615e-11	115.57	100.19	83.53	1	67.9969	6.39615e-11	115.57	1	83.5305	0.00236682	83.53
479	B7Z766	cDNA FLJ54564, highly similar to 150 kDa oxygen-regulated protein (Orp150)								None	None	None	0	1	0				22196000									1	117.2	4.12091e-06	117.2	90.45	117.2													1	111.388	0.000850858	111.39
480	B7Z766	cDNA FLJ54564, highly similar to 150 kDa oxygen-regulated protein (Orp150)				16.025	0.110848			None	None	None	2	1	3		8119600	6104700	12154000			65303000	186420000	90194000	7112150		1.13972e+08	1	309.875	0	347.76	324.01	309.87					1	210.336	7.26503e-46	210.34	1	161.629	1.94475e-28	161.63	1	246.859	3.42498e-90	246.86
481	B7Z766	cDNA FLJ54564, highly similar to 150 kDa oxygen-regulated protein (Orp150)								None	None	None	0	1	1				20045000				96189000					0.999996	53.5059	1.35654e-08	138.68	97.306	138.68													0.997959	26.893	0.000445947	104.45
482	B7Z766	cDNA FLJ54564, highly similar to 150 kDa oxygen-regulated protein (Orp150)								None	OA Unique	OA Unique	0	0	3							409430000	773810000	437160000			5.40133e+08	1	121.733	2.31557e-05	149.72	92.44	121.73													1	112.748	0.00406668	112.75
483	B7Z766	cDNA FLJ54564, highly similar to 150 kDa oxygen-regulated protein (Orp150)								None	OA Unique	None	0	1	3				39979000			253790000	305970000	113670000			2.24477e+08	1	95.7414	0.0181561	95.741	58.014	95.741													1	89.698	0.0210989	89.698
484	H0Y8G4	ADP-ribosyl cyclase/cyclic ADP-ribose hydrolase 2 (Fragment)	BST1							None	None	None	0	1	1				11069000					47864000				1	42.2538	2.04399e-13	130.89	119.03	42.254													1	130.885	2.04399e-13	130.89
485	A0A3B3IRL2	Cellular repressor of E1A-stimulated genes 1, isoform CRA_a (Protein CREG1)	CREG1 hCG_41319							None	None	None	2	1	1		18178000	6844900	20462000				243300000		12511450			1	96.0344	0.000311055	132.01	110.56	96.034					1	116.305	0.00120778	116.3	1	94.6917	0.012262	94.692	1	132.01	0.000311055	132.01
486	B4DJU3	cDNA FLJ50742, highly similar to Inositol 1,4,5-trisphosphate receptor type 1								None	None	None	0	1	1				1567100				5918700					1	101.954	0.00445081	101.95	65.261	101.95													1	75.294	0.0186142	75.294
487	C9JY01	Translocon-associated protein subunit alpha (Fragment)	SSR1							None	None	None	0	0	0													0.500005	0	2.70584e-22	134.24	105.95	81.448													0.5	0	2.70584e-22	134.24
488	C9JY01	Translocon-associated protein subunit alpha (Fragment)	SSR1							None	None	None	0	0	0													0.500005	0	2.70584e-22	134.24	105.95	81.448													0.5	0	2.70584e-22	134.24
489	C9JY01	Translocon-associated protein subunit alpha (Fragment)	SSR1							None	None	None	0	0	0													1	183.721	6.95966e-182	241.93	216.75	241.93													1	183.721	6.95966e-182	241.93
490	A0A3B3IS66	Coagulation factor XIII B chain (Fragment)	F13B							None	None	None	0	1	0				15082000									1	193.19	4.30788e-35	193.19	179.76	193.19													1	193.19	4.30788e-35	193.19
491	B4E1B0	cDNA FLJ54318, highly similar to Complement C1r subcomponent								None	None	None	0	1	1				43294000				484650000					1	137.831	0.00270629	143.97	19.111	137.83													1	143.975	0.00270629	143.97
492	B4E1B0	cDNA FLJ54318, highly similar to Complement C1r subcomponent								None	None	None	0	0	1								332910000					1	211.609	0	359.54	338.65	359.54
493	A0A3B3ISX9	Tenascin-X	TNXB	11.9391	0.0799015	65.8776	0.00135616	0.181232	0.00457124	None	Up	Down	3	3	3	7365100	16744000	6823700	212310000	110230000	46771000	663820000	832010000	541950000	1.03109e+07	1.23104e+08	679260000	1	178.222	2.41345e-10	204.7	139.66	178.22	1	130.748	0.000660596	130.75	1	159.368	0.001135	159.37	1	166.161	0.00168393	166.16	1	195.573	1.3254e-06	195.57
494	A0A3B3ISX9	Tenascin-X	TNXB	3.44821	0.286066	28.866	0.00135292	0.119456	0.000405464	None	Up	Down	2	3	3		74699000	31800000	333910000	137600000	79337000	1726800000	1483100000	1401400000	53249500	1.83616e+08	1537100000	1	264.003	1.55052e-251	318.62	289.31	264	1	216.684	1.05761e-137	216.68	1	258.36	1.46378e-104	258.36	1	208.465	5.69265e-46	208.47	1	181.337	1.55052e-251	318.62
495	A0A3B3ISX9	Tenascin-X	TNXB							None	None	None	0	1	0				70919000									1	171.756	7.51603e-09	188.91	121.45	171.76													1	188.907	7.51603e-09	188.91
496	A0A3B3ISX9	Tenascin-X	TNXB							None	OA Unique	None	0	1	2				35265000			301990000		261640000			281815000	1	181.615	1.81954e-104	194.36	185.67	181.62													1	122.882	4.80517e-44	122.88
497	B4DF84	cDNA FLJ60463, highly similar to Homo sapiens glycosyltransferase 25 domain containing 2 (GLT25D2), mRNA								None	None	None	1	1	0		8725900		7837000									1	87.3226	0.0189009	100.19	49.222	87.323					1	80.2291	0.0314765	80.229					1	100.188	0.0189009	100.19
498	B4DF84	cDNA FLJ60463, highly similar to Homo sapiens glycosyltransferase 25 domain containing 2 (GLT25D2), mRNA								None	None	None	1	1	1		9103000		13400000				112580000					1	82.5555	0	357.91	320.93	357.91					0.989294	19.6569	0.000622749	95.205					0.998377	27.8896	3.91954e-25	155.11
499	B7ZKN7	BLM protein	BLM							None	OA Unique	None	0	1	3				96448000			194660000	698870000	351060000			4.14863e+08	1	125.504	0.00337731	148.04	62.23	125.5													1	134.083	0.00355148	134.08
500	P35442	Thrombospondin-2	THBS2 TSP2							None	None	None	0	1	0				6044900									1	46.4609	0.0229051	46.461	42.741	46.461													1	46.4609	0.0229051	46.461
501	P35442	Thrombospondin-2	THBS2 TSP2	11.4744	0.0233115	55.0575	0.0133187	0.208407	0.0291598	Up	Up	Down	3	3	3	36898000	25530000	41743000	580060000	228410000	386830000	1025500000	2341000000	2368900000	3.47237e+07	3.98433e+08	1911800000	1	166.692	1.42446e-109	276.35	238.05	166.69	1	140.075	6.06417e-07	140.07	1	204.174	6.28582e-17	204.17	1	164.109	6.24262e-09	164.11	1	47.9914	1.42446e-109	276.35
502	A0PJ49	FGFRL1 protein (Fragment)	FGFRL1	0.503362	0.0450921					None	CK Unique	KBD Unique	3	2	0	8015700	10651000	11880000	4595400	5655300					1.01822e+07	5125350		1	68.2235	0.00475286	114.5	77.928	68.224	1	68.2235	0.0421152	68.224	1	113.706	0.00537173	113.71	1	114.498	0.00475286	114.5	1	69.5982	0.0400654	69.598
503	A0PJ49	FGFRL1 protein (Fragment)	FGFRL1			6.01934	0.145758			None	None	None	2	1	2		10669000	8788600	7191800			37568000	79554000		9728800		58561000	1	241.398	1.17372e-154	283.82	219.61	241.4					1	162.26	3.86688e-05	162.26	1	128.88	5.06281e-05	128.88	1	81.5247	0.0113599	81.525
504	B4DRZ0	cDNA FLJ61364, highly similar to Gamma-glutamyltransferase 4								None	None	None	0	0	0													1	61.4352	0.0218638	61.435	33.693	61.435													1	61.4352	0.0218638	61.435
505	B3KQX7	cDNA FLJ33256 fis, clone ASTRO2005557, highly similar to MAJOR PRION PROTEIN				6.34754	0.00421694			None	Up	None	3	1	3	82621000	312810000	180920000	77027000			1259500000	1477800000	921110000	192117000		1219470000	1	120.332	0.000322392	160.53	136.58	120.33	1	70.5516	0.0356088	70.552	1	160.531	0.00120313	160.53	1	105.396	0.00640126	105.4	1	123.596	0.000342386	123.6
506	A2A2S5	Ribosome-binding protein 1 (Fragment)	RRBP1							None	None	None	0	0	0													1	65.467	0.0098171	65.467	46.871	65.467
507	M0QYW8	L-amino-acid oxidase (Fragment)	IL4I1							KBD Unique	None	KBD Unique	0	2	0				56405000		37836000					47120500		1	101.381	0.00443955	104.22	57.796	101.38													1	104.221	0.00443955	104.22
508	B3KQB2	cDNA FLJ90112 fis, clone HEMBA1006707, highly similar to Matrilin-4						0.0435399	0.228902	KBD Unique	OA Unique	None	0	3	3				97334000	69755000	88192000	489870000	4583300000	789980000		8.50937e+07	1.95438e+09	1	128.976	1.27605e-41	179.36	174.47	128.98													1	115.536	9.83848e-09	115.54
509	A5D8U1	Matrilin 4	MATN4					0.0448779	0.343985	None	None	None	1	2	2			463190000	168470000		248540000		8255900000	1036200000		208505000	4646050000	1	101.302	0.00104855	138.06	75.598	138.06									1	65.1166	0.0450524	98.009	1	81.9796	0.00201381	113.74
510	Q5T987	Inter-alpha-trypsin inhibitor heavy chain H2 (Fragment)	ITIH2							None	None	KBD Unique	1	2	0	7119800			85107000		67889000					76498000		1	107.026	1.6201e-09	152.85	106.86	107.03	1	66.2667	0.0279549	66.267									1	152.854	1.6201e-09	152.85
511	H0YEA7	N-acetylglucosamine-1-phosphotransferase subunit gamma (Fragment)	GNPTG							CK Unique	CK Unique	None	3	0	0	11350000	11483000	10816000							1.12163e+07			1	140.017	1.12911e-10	140.02	127.18	140.02	1	40.0847	3.85627e-08	130.56	1	100.042	0.000636156	100.04	1	140.017	1.12911e-10	140.02
512	A3KC71	Nuclear envelope protein okuribin	okuribin							None	None	None	0	1	0				10320000									0.5	0	0.00196913	86.814	67.571	86.814													0.5	0	0.00196913	86.814
513	A3KC71	Nuclear envelope protein okuribin	okuribin					0.179704	0.0015272	None	None	Down	1	3	2			87989000	120470000	36862000	72723000		426900000	426560000		76685000	426730000	0.9061	9.84512	2.84098e-14	167.2	116.43	112.51									0.817898	6.52385	3.66809e-14	167.2	0.775495	5.38353	2.84098e-14	160.86
514	A3KC71	Nuclear envelope protein okuribin	okuribin							None	OA Unique	OA Unique	0	0	2								566370000	716150000			641260000	1	302.324	1.26691e-228	302.32	278.49	302.32
515	V9GYR2	Sodium/potassium-transporting ATPase subunit beta (Fragment)	ATP1B1			33.0103	0.00187485			None	Up	None	2	1	3		65726000	44579000	92048000			1624600000	2068700000	1768500000	55152500		1820600000	1	134.655	4.76814e-189	300.55	276.25	294.81	0.999413	32.3108	5.2507e-05	92.468	1	106.098	2.49487e-80	245.03	1	111.069	8.79854e-110	267.21	1	119.177	2.0427e-167	297.5
516	A3KMG0	MATN1 protein (Fragment)	MATN1							CK Unique	CK Unique	None	3	0	0	13696000	20982000	33779000							22819000			1	251.837	2.46718e-81	251.84	235.36	251.84	1	251.837	2.46718e-81	251.84	1	203.317	1.86614e-30	203.32	1	251.837	2.46718e-81	251.84
517	Q53GD2	Fibrinogen-like 2 variant (Fragment)						0.060734	0.106957	KBD Unique	OA Unique	None	0	2	3					23641000	10136000	134860000	440220000	259140000		16888500	2.78073e+08	1	138.396	0.00194293	138.4	93.949	138.4													1	109.714	0.0116651	109.71
518	Q53GD2	Fibrinogen-like 2 variant (Fragment)								KBD Unique	None	None	0	3	1				43174000	36620000	30939000			262010000		36911000		0.999614	34.1325	0.000588293	106.55	97.013	106.55					0.999442	32.5287	0.000588293	97.203					0.998788	29.1589	0.00132221	97.203
519	A4D213	DKFZP586J0619 protein	DKFZP586J0619 tcag7.531							None	None	None	0	0	1								434480000					1	82.4167	0.010593	82.417	50.986	82.417
520	A4QPA1	PTGFRN protein (Fragment)	PTGFRN							None	None	None	0	0	0													1	164.335	1.01899e-30	164.33	93.112	164.33
521	A4QPA1	PTGFRN protein (Fragment)	PTGFRN							None	OA Unique	None	0	1	2				35139000			138140000	275840000				206990000	1	109.439	0.00205298	166.07	123.96	109.44	1	85.7306	0.026012	85.731	1	92.0512	0.0288715	92.051					1	166.066	0.0038627	166.07
522	A4QPA1	PTGFRN protein (Fragment)	PTGFRN							None	None	None	0	0	1							17468000						1	87.1812	0.0243078	87.181	55.246	87.181
523	A5D8U1	Matrilin 4	MATN4					0.0375112	0.398088	KBD Unique	OA Unique	None	0	2	2					30802000	60324000	118000000	2311300000			45563000	1214650000	1	227.305	5.30716e-90	227.3	223.96	227.3
524	H7C0M6	Sialoadhesin (Fragment)	SIGLEC1							KBD Unique	None	KBD Unique	0	2	0				13160000		6992000					10076000		1	99.752	2.21833e-40	229.29	162.86	99.752													1	229.293	2.21833e-40	229.29
525	H7C0M6	Sialoadhesin (Fragment)	SIGLEC1							None	None	None	0	1	0				6617900									1	138.767	2.09157e-14	138.77	124.21	138.77													1	138.767	2.09157e-14	138.77
526	B3KTA8	cDNA FLJ37971 fis, clone CTONG2009958, highly similar to CERULOPLASMIN		4.4922	0.0113365	7.76288	0.0608968	0.578677	0.40257	Up	None	None	3	2	3	67710000	170420000	54447000	489730000		386480000	317630000	761910000	1191700000	9.75257e+07	438105000	757080000	1	64.0638	2.07588e-94	229.02	206.21	192.24	0.999999	59.6615	2.07588e-94	198.51	0.999996	54.422	3.23084e-25	189.45	0.999984	48.0814	1.1801e-20	169.4	1	64.0638	2.11561e-25	192.24
527	B3KTA8	cDNA FLJ37971 fis, clone CTONG2009958, highly similar to CERULOPLASMIN		1.50113	0.705675					None	None	None	3	3	1	76241000	192820000	100380000	479590000	16171000	58819000	1077200000			123147000	184860000		1	91.9687	3.27536e-225	309.29	286.05	91.969	1	203.114	1.94334e-39	203.11	1	134.14	4.68212e-14	134.14	1	190.435	4.86892e-34	190.44	1	287.416	2.50345e-157	287.42
528	Q59F71	Metalloendopeptidase (EC 3.4.24.-) (Fragment)								None	CK Unique	None	3	1	0	16640000	14491000	15228000	26447000						15453000			1	163.877	6.68326e-06	163.88	127.54	163.88	1	152.973	6.68326e-06	152.97	1	152.973	6.68326e-06	152.97	1	112.748	0.00208661	112.75	1	163.877	1.38262e-05	163.88
529	K7EMC3	Apolipoprotein C-IV	APOC4							None	None	None	0	1	0				5620500									1	93.4285	0.0192823	93.429	55.106	93.429													1	93.4285	0.0192823	93.429
530	L7RXH0	Integrin, alpha V	ITGAV	2.58444	0.247749	15.1102	0.0342522	0.17104	0.0528493	None	Up	None	3	3	3	27105000	49995000	18771000	154320000	56068000	37385000	419680000	755120000	273830000	31957000	82591000	4.82877e+08	1	84.1687	2.18319e-14	156.69	144.11	84.169	1	73.4663	0.00900852	73.466	1	77.1846	0.00487135	77.185	1	128.675	6.09641e-06	128.68	1	156.004	2.18319e-14	156
531	L7RXH0	Integrin, alpha V	ITGAV							None	None	None	0	1	1				20676000					61556000				1	73.5749	4.41745e-10	203.02	154.27	201.84													0.999997	55.0773	4.41745e-10	203.02
532	L7RXH0	Integrin, alpha V	ITGAV	2.12343	0.499177	17.8144	0.0538667	0.119198	0.149112	None	None	None	3	2	3	18108000	75998000	35976000	172020000		12127000	425090000	1302100000	590140000	4.33607e+07	92073500	7.72443e+08	1	221.47	3.06243e-80	243.41	201.02	221.47	1	110.735	3.16668e-05	110.74	1	115.816	5.73279e-39	200.39	1	183.562	1.32462e-30	183.56	1	154.47	3.06243e-80	243.41
533	L7RXH0	Integrin, alpha V	ITGAV							None	None	None	0	0	0													1	118.011	0.0130345	118.01	69.769	118.01									1	89.7035	0.030721	89.703
534	L7RXH0	Integrin, alpha V	ITGAV							None	None	None	0	1	1				168710000				611830000					1	65.4454	0	326.56	306.96	285.65	0.999996	54.5568	0	280.4									0.99991	40.4743	1.78832e-293	326.56
535	A6NCT7	Collagen alpha-1(XVI) chain	COL16A1							None	None	None	0	1	0				4542200									1	84.6583	0.00959242	84.658	66.75	84.658													1	84.6583	0.00959242	84.658
536	A6NCT7	Collagen alpha-1(XVI) chain	COL16A1	1.09691	0.851022	7.24798	0.0417521	0.15134	0.0448307	None	Up	Down	2	2	3	32250000		23440000	18669000	42418000		125650000	223200000	256610000	27845000	30543500	201820000	1	123.591	5.56076e-91	250.47	226.83	227.46	0.999999	58.696	8.09793e-12	130.39	1	113.018	5.56076e-91	250.47	0.999998	57.0371	1.4635e-14	139.04	1	83.9886	2.56768e-34	192.55
537	Q9P255	Zinc finger protein 492 (Zinc finger protein 115)	ZNF492 KIAA1473 ZNF115			3.42327	0.0111373			None	Up	None	3	1	3	2570500000	56166000	1590300000	1072600000			5049100000	5008900000	4377800000	1.40566e+09		4.81193e+09	1	135.84	2.73963e-14	138.63	81.915	138.63	1	117.172	1.35774e-08	122.33	0.999997	55.1791	0.0236503	55.314	1	127.971	1.34809e-12	133.05	1	135.84	2.73963e-14	138.63
538	Q9P255	Zinc finger protein 492 (Zinc finger protein 115)	ZNF492 KIAA1473 ZNF115			3.42327	0.0111373			None	Up	None	3	1	3	2570500000	56166000	1590300000	1072600000			5049100000	5008900000	4377800000	1.40566e+09		4.81193e+09	1	135.84	2.73963e-14	138.63	81.915	138.63	1	117.172	1.35774e-08	122.33	0.999997	55.1791	0.0236503	55.314	1	127.971	1.34809e-12	133.05	1	135.84	2.73963e-14	138.63
539	A6NLG9	Biglycan		0.376689	0.373423	0.806939	0.84574	0.466812	0.646785	None	None	None	3	3	3	339140000	29154000000	23743000000	19934000000	65367000	54076000	101670000	656660000	42200000000	17745380000	6684481000	1.43194e+10	1	67.9304	9.09095e-154	265.53	213.37	67.93	1	67.9304	9.09095e-154	265.53	0.797481	5.95255	1.7714e-23	211.26	0.666427	3.00561	2.56789e-05	128.22	0.929208	11.1813	2.07306e-70	196.57
540	A6NLG9	Biglycan		2.52485	0.213709	5.15223	0.20646	0.490049	0.368839	None	None	None	3	3	3	235060000	13774000	18725000000	14301000000	20037000000	13568000000	48398000000	49358000000	1499900	6.32461e+09	1.59687e+10	32585833300	1	67.9304	9.09095e-154	297.18	238.11	67.93	1	67.9304	9.09095e-154	265.53	0.849028	7.50025	2.20146e-05	128.96	0.790882	5.7772	2.0093e-148	297.18	0.896134	9.359	7.19849e-110	271.6
541	A6NLG9	Biglycan						0.195268	0.00244093	None	None	Down	1	3	3	1024600000			663360000	1274100000	680990000	3708500000	5382900000	4318100000		8.72817e+08	4.46983e+09	1	178.15	1.50587e-199	290.66	253.96	178.15	1	87.363	6.31165e-110	272.65	1	91.8546	1.62764e-52	240.6	1	112.506	2.69074e-133	277.06	1	160.685	1.66127e-110	278.38
542	A6NMZ7	Collagen alpha-6(VI) chain	COL6A6							None	None	None	0	0	1								24373000					1	113.499	0.00975159	113.5	61.712	113.5
543	A6XAA7	Gremlin	GREM1 hCG_1811964			4.52758	0.00121663			None	Up	None	2	1	3		227920000	235670000	43589000			960210000	1046800000	1141400000	231795000		1049470000	1	188.578	0	363.37	350.95	188.58					1	331.419	2.60679e-267	331.42	1	363.368	0	363.37	1	249.297	1.08615e-80	249.3
544	B3KWK7	Insulin-like growth factor binding protein 3, isoform CRA_b (Insulin-like growth factor-binding protein 3) (cDNA FLJ43234 fis, clone HCHON2002964, highly similar to Insulin-like growth factor-binding protein 3)	IGFBP3 hCG_1735376							None	None	None	0	0	1								46721000					1	137.796	2.63517e-14	137.8	122.41	137.8
545	B3KWK7	Insulin-like growth factor binding protein 3, isoform CRA_b (Insulin-like growth factor-binding protein 3) (cDNA FLJ43234 fis, clone HCHON2002964, highly similar to Insulin-like growth factor-binding protein 3)	IGFBP3 hCG_1735376							None	None	None	0	1	0				111360000									1	117.312	0.000881606	117.31	63.537	117.31													1	117.312	0.000881606	117.31
546	A8K369	cDNA FLJ76707, highly similar to Homo sapiens transmembrane protein 87A, mRNA						0.227808	0.232484	KBD Unique	OA Unique	None	0	2	3				50497000		14159000	87328000	253720000	84679000		32328000	141909000	1	156.917	0.000991393	156.92	96.327	156.92													1	116.521	0.00118205	116.52
547	A8K0R3	Osteoglycin (Osteoinductive factor, mimecan), isoform CRA_a (cDNA FLJ78199, highly similar to Homo sapiens osteoglycin (osteoinductive factor, mimecan) (OGN), transcript variant 3, mRNA) (cDNA PSEC0219 fis, clone HEMBA1005229, highly similar to Mimecan)	OGN hCG_31130	3.02922	0.0127557	10.5905	3.22382e-06	0.286032	7.47907e-05	Up	Up	Down	3	3	3	9594800000	19869000000	13538000000	55503000000	38652000000	36107000000	148090000000	151550000000	155770000000	1.43339e+10	4.34207e+10	1.51803e+11	1	83.4175	8.71929e-66	261.03	204.6	83.418	1	119.274	0.00618395	126.62	1	119.406	0.00407522	130.27	1	159.039	0.00572173	159.04	1	62.3026	0.00572173	163.77
548	A8K0R3	Osteoglycin (Osteoinductive factor, mimecan), isoform CRA_a (cDNA FLJ78199, highly similar to Homo sapiens osteoglycin (osteoinductive factor, mimecan) (OGN), transcript variant 3, mRNA) (cDNA PSEC0219 fis, clone HEMBA1005229, highly similar to Mimecan)	OGN hCG_31130							None	OA Unique	OA Unique	0	0	2							233620000		576450000			405035000	0.999999	62.0502	2.80953e-102	237.31	211.44	149.34					0.862188	7.20927	0.0116109	45.596
549	A8K0R3	Osteoglycin (Osteoinductive factor, mimecan), isoform CRA_a (cDNA FLJ78199, highly similar to Homo sapiens osteoglycin (osteoinductive factor, mimecan) (OGN), transcript variant 3, mRNA) (cDNA PSEC0219 fis, clone HEMBA1005229, highly similar to Mimecan)	OGN hCG_31130	4.94104	0.0688759	34.6485	0.50638	0.142605	0.439584	None	None	None	2	3	3		609090000	366090000	1533500000	3365600000	2328500000	7398500	7335800	50668000000	487590000	2409200000	1.68942e+10	0.999968	44.9	1.12998e-280	319.32	286.8	149.34					0.990629	20.241	1.12998e-280	319.32	0.999488	32.9013	1.56024e-102	235.7	0.990631	20.2424	3.8176e-54	187.51
550	A8K0R3	Osteoglycin (Osteoinductive factor, mimecan), isoform CRA_a (cDNA FLJ78199, highly similar to Homo sapiens osteoglycin (osteoinductive factor, mimecan) (OGN), transcript variant 3, mRNA) (cDNA PSEC0219 fis, clone HEMBA1005229, highly similar to Mimecan)	OGN hCG_31130							None	None	None	0	0	0													0.999962	43.6769	6.162e-17	97.542	86.121	97.542									0.999962	43.6769	6.162e-17	97.542
551	A8K0R3	Osteoglycin (Osteoinductive factor, mimecan), isoform CRA_a (cDNA FLJ78199, highly similar to Homo sapiens osteoglycin (osteoinductive factor, mimecan) (OGN), transcript variant 3, mRNA) (cDNA PSEC0219 fis, clone HEMBA1005229, highly similar to Mimecan)	OGN hCG_31130							None	OA Unique	OA Unique	0	0	3							614820000	640750000	542580000			5.99383e+08	1	45.6082	2.936e-05	106.16	99.798	45.608
552	A8K0R3	Osteoglycin (Osteoinductive factor, mimecan), isoform CRA_a (cDNA FLJ78199, highly similar to Homo sapiens osteoglycin (osteoinductive factor, mimecan) (OGN), transcript variant 3, mRNA) (cDNA PSEC0219 fis, clone HEMBA1005229, highly similar to Mimecan)	OGN hCG_31130							KBD Unique	None	None	0	2	1					61341000	106500000			623720000		83920500		1	45.6082	3.30968e-11	117.67	111.21	45.608
553	A8K2T4	Complement component C7	C7							None	None	None	0	0	0													1	114.186	0.0208764	114.19	77.629	114.19
554	F5H1C0	Microfibrillar-associated protein 5 (Fragment)	MFAP5							None	None	None	0	1	1				237470000				138320000					1	95.5231	0.000563527	121.73	115.06	95.523													1	121.733	0.000563527	121.73
555	Q14CE1	GPR64 protein	GPR64							None	OA Unique	OA Unique	0	0	2								71474000	63725000			67599500	0.999093	30.4201	5.18374e-05	101.47	94.196	101.47
556	B7Z4A4	cDNA FLJ53058, highly similar to Legumain								None	None	None	0	1	1				35862000				361220000					1	89.5479	6.45543e-46	238.51	178.71	89.548													1	238.511	6.45543e-46	238.51
557	B7Z4A4	cDNA FLJ53058, highly similar to Legumain						0.248704	0.0825496	KBD Unique	OA Unique	None	0	3	3				56033000	21900000	18797000	56817000	196970000	135150000		3.22433e+07	1.29646e+08	1	171.255	1.80848e-09	171.26	152.66	171.26													1	112.634	0.000614258	112.63
558	B7Z4A4	cDNA FLJ53058, highly similar to Legumain						0.248704	0.0825496	KBD Unique	OA Unique	None	0	3	3				56033000	21900000	18797000	56817000	196970000	135150000		3.22433e+07	1.29646e+08	1	171.255	1.80848e-09	171.26	152.66	171.26													1	112.634	0.000614258	112.63
559	B4E0K9	Alpha-mannosidase (EC 3.2.1.-)								None	None	None	0	1	0				12041000									1	127.78	1.74992e-14	148.52	95.282	148.52													1	127.78	1.74992e-14	148.52
560	Q5JRP2	Disintegrin and metalloproteinase domain-containing protein 12 (Fragment)	ADAM12							None	None	None	0	0	0													1	79.8202	0.00159861	79.82	57.287	79.82													1	79.8202	0.00159861	79.82
561	B4DK26	cDNA FLJ61301, highly similar to CD276 antigen								KBD Unique	None	KBD Unique	0	3	0				67571000	40589000	42183000					5.01143e+07		1	170.163	3.28287e-65	228.32	209.9	170.16													1	228.318	3.28287e-65	228.32
562	B4DK26	cDNA FLJ61301, highly similar to CD276 antigen						0.240794	0.0393516	KBD Unique	OA Unique	Down	0	3	3				242630000	158560000	157020000	684550000	1141400000	492260000		186070000	7.72737e+08	1	198.318	2.11036e-29	210.31	184.89	198.32													1	210.311	2.11036e-29	210.31
563	B4DK26	cDNA FLJ61301, highly similar to CD276 antigen								None	None	None	0	0	1								162610000					1	172.804	1.25933e-43	172.8	130.8	172.8													1	103.181	0.00174803	103.18
564	G3V0E5	Transferrin receptor (P90, CD71), isoform CRA_c (Transferrin receptor protein 1)	TFRC hCG_22086							None	OA Unique	None	0	1	3				72375000			76101000	133660000	59291000			89684000	1	123.639	5.54064e-30	202.44	179.56	123.64													1	202.442	5.54064e-30	202.44
565	D3DVN8	Iduronidase, alpha-L-, isoform CRA_a	IDUA hCG_34451							None	None	KBD Unique	1	3	0	4222600			7888000	16148000	8444100					10826700		0.986681	18.6969	0.00133388	95.651	78.144	73.91	0.904727	9.77546	0.0360337	45.434									0.977456	16.3706	0.00151461	83.729
566	E9PNW2	Transmembrane 9 superfamily member (Fragment)	TM9SF1							None	None	None	0	1	0				8889200									1	81.5478	0.0251311	81.548	33.044	81.548													1	80.4381	0.0251311	80.438
567	A8K8F6	cDNA FLJ78417, highly similar to Homo sapiens low density lipoprotein receptor-related protein associated protein 1 (LRPAP1), mRNA								None	None	None	1	1	3	24194000			92933000			391970000	752010000	248430000			4.64137e+08	1	194.697	1.38467e-85	253.88	201.19	194.7	1	194.241	1.28762e-18	194.24									1	253.882	1.38467e-85	253.88
568	A8K8T0	cDNA FLJ78760, highly similar to Homo sapiens integrin, alpha 11 (ITGA11), transcript variant 1, mRNA								None	None	None	0	1	0				11399000									0.948092	12.6161	3.36993e-19	148.97	127.29	148.97													0.948092	12.6161	3.36993e-19	148.97
569	A8K8T0	cDNA FLJ78760, highly similar to Homo sapiens integrin, alpha 11 (ITGA11), transcript variant 1, mRNA								None	None	None	0	0	0													0.981979	17.1607	8.02779e-28	109.97	88.508	58.722
570	A8K8T0	cDNA FLJ78760, highly similar to Homo sapiens integrin, alpha 11 (ITGA11), transcript variant 1, mRNA								None	None	None	0	1	0				10871000									0.999792	36.8304	7.61963e-66	178.33	162.56	178.33													0.999792	36.8304	7.61963e-66	178.33
571	A8K8T0	cDNA FLJ78760, highly similar to Homo sapiens integrin, alpha 11 (ITGA11), transcript variant 1, mRNA								None	None	None	0	0	0													1	180.88	2.68252e-53	180.88	130.27	180.88													1	180.88	2.68252e-53	180.88
572	A8K8T0	cDNA FLJ78760, highly similar to Homo sapiens integrin, alpha 11 (ITGA11), transcript variant 1, mRNA								None	None	None	0	1	1				11987000			16777000						1	131.031	0.000138755	139.88	111.37	131.03													1	139.878	0.00330994	139.88
573	E9PBC5	Plasma kallikrein	KLKB1							None	None	None	0	1	0				26890000									0.999985	48.3786	0.0100526	113.14	52.488	113.14													0.999985	48.3786	0.0100526	113.14
574	E9PBC5	Plasma kallikrein	KLKB1							None	OA Unique	OA Unique	0	0	2								365280000	275320000			320300000	1	132.857	1.19149e-24	145.81	112.73	132.86													1	145.815	1.19149e-24	145.81
575	E9PBC5	Plasma kallikrein	KLKB1							None	OA Unique	None	0	1	3				62274000			252940000	551090000	305010000			369680000	1	190.26	6.71222e-16	190.26	143.06	190.26													1	161.19	1.15714e-08	161.19
577	Q6AWA9	Uncharacterized protein DKFZp686A03134 (Fragment)	DKFZp686A03134							None	None	None	0	1	0				32042000									1	342.433	7.12552e-284	342.43	292.23	342.43													1	342.433	7.12552e-284	342.43
578	Q6AWA9	Uncharacterized protein DKFZp686A03134 (Fragment)	DKFZp686A03134							None	None	None	0	1	0				19512000									0.965414	14.4581	1.50834e-21	182.39	164.96	182.39													0.965414	14.4581	8.36864e-06	182.39
579	Q9UH97	Hematopoietic progenitor cell antigen CD34 (Fragment)	CD34							None	None	None	0	0	0													1	140.446	4.69871e-09	140.45	81.096	140.45													1	75.6522	0.0308043	75.652
580	B7ZL93	GPR107 protein (Fragment)	GPR107							None	None	None	0	0	0													0.999732	35.7644	2.83113e-08	103.76	89.33	103.76													0.999732	35.7644	2.83113e-08	103.76
581	A8KAM8	Platelet-derived growth factor receptor beta (PDGF-R-beta) (PDGFR-beta) (EC 2.7.10.1) (Beta platelet-derived growth factor receptor) (Beta-type platelet-derived growth factor receptor)								None	None	None	0	1	0				24268000									1	77.7442	2.11718e-06	133.89	95.807	77.744													1	133.893	2.11718e-06	133.89
582	B4DUJ2	cDNA FLJ54063, highly similar to Homo sapiens CD74 antigen, transcript variant 2, mRNA								None	None	None	0	1	0				13371000									1	103.388	3.48224e-14	124.2	115.71	124.2													1	103.388	3.48224e-14	124.2
583	B2R8K9	Aminopeptidase (EC 3.4.11.-)								KBD Unique	None	None	0	3	1				42158000	25317000	31805000			85190000		3.30933e+07		1	140.483	5.22045e-30	176.95	176.95	140.48													1	176.948	2.58324e-05	176.95
584	B2R8K9	Aminopeptidase (EC 3.4.11.-)								None	None	None	0	1	0				5687200									0.999971	46.0892	1.05618e-07	115.12	106.84	115.12													0.999971	46.0892	1.05618e-07	115.12
585	Q59F32	Myosin VIIA variant (Fragment)								None	None	None	0	0	1							560290000						0.5	0	0.0110973	67.952	34.724	67.952
586	Q59F32	Myosin VIIA variant (Fragment)								None	None	None	0	0	1							560290000						0.5	0	0.0110973	67.952	34.724	67.952
587	J3QRJ3	Thy-1 membrane glycoprotein	THY1					0.228025	0.01932	KBD Unique	OA Unique	Down	0	3	3				301060000	190760000	353800000	1109000000	1713800000	885660000		2.81873e+08	1.23615e+09	1	249.775	0	339.86	322.14	249.78													1	49.7651	5.24271e-103	238.63
588	J3QRJ3	Thy-1 membrane glycoprotein	THY1					0.214239	0.251913	KBD Unique	OA Unique	None	0	3	3				229810000	65348000	109500000	360470000	1354600000	173750000		134886000	6.29607e+08	1	195.919	0	479.73	403.58	195.92													1	321.819	3.57499e-239	321.82
589	B1ALB4	Protein SMG7 (Fragment)	SMG7							None	None	None	0	0	0													1	85.6701	0.0124075	85.67	44.59	85.67	1	85.6701	0.0124075	85.67
590	H0YGE9	Cation-dependent mannose-6-phosphate receptor (Fragment)	M6PR							None	OA Unique	None	0	1	2				52856000			277620000	872990000				575305000	1	235.892	7.06856e-101	264.22	187.75	264.22													1	152.679	9.93824e-15	156.57
591	Q53QN4	Uncharacterized protein FRZB (Fragment)	FRZB			8.46933	0.00956854			None	Up	None	2	1	3		70789000	85617000	84343000			599450000	813870000	573660000	78203000		6.62327e+08	1	111.648	0.011286	111.65	71.545	111.65					1	95.3523	0.0211248	95.352	1	91.9001	0.0223905	91.9	1	87.7543	0.0239105	87.754
592	P08236	Beta-glucuronidase (EC 3.2.1.31) (Beta-G1)	GUSB							None	None	None	1	0	0		32520000											1	109.943	0.0141389	111.28	52.618	109.94					1	111.278	0.0141389	111.28
593	P08236	Beta-glucuronidase (EC 3.2.1.31) (Beta-G1)	GUSB	2.98721	0.0112878	21.1587	0.0634733	0.141181	0.0835736	Up	None	None	3	3	3	11992000	15004000	10832000	47384000	37265000	28351000	134080000	462200000	204110000	1.26093e+07	3.76667e+07	2.66797e+08	1	181.624	7.30108e-23	211.64	176.42	181.62	1	127.765	0.000143886	127.76	1	172.694	1.45286e-08	172.69	1	177.063	6.36695e-09	177.06	1	211.642	7.30108e-23	211.64
594	B7Z9M1	cDNA, FLJ78885, highly similar to Neutral amino acid transporter A								None	None	None	0	1	1						3781200	42294000						1	148.183	5.00232e-11	148.18	138.23	148.18									1	65.4716	0.0100202	65.472
595	B7Z9M1	cDNA, FLJ78885, highly similar to Neutral amino acid transporter A								None	None	None	0	1	1						3781200	42294000						1	148.183	5.00232e-11	148.18	138.23	148.18									1	65.4716	0.0100202	65.472
596	B2R7N9	cDNA, FLJ93532, highly similar to Homo sapiens osteomodulin (OMD), mRNA								None	None	None	0	1	0				25112000									0.807506	6.22737	1.13039e-22	133.58	120.33	116.24													0.807506	6.22737	1.024e-10	116.24
597	B2R7N9	cDNA, FLJ93532, highly similar to Homo sapiens osteomodulin (OMD), mRNA		3.19114	0.0164263					Up	None	None	3	2	1	40525000	94738000	46398000		172160000	214310000			145250000	6.05537e+07	193235000		1	67.8637	1.28347e-39	176.84	163.77	67.864	1	90.8841	4.83349e-25	147.21	1	154.336	5.23935e-32	159.14	1	64.7489	7.338e-14	132.45
598	Q6IAP9	PRPF4 protein	PRPF4							None	None	None	0	0	0													1	96.9477	0.00453115	96.948	23.699	96.948
599	Q59EE5	Tissue factor pathway inhibitor (Lipoprotein-associated coagulation inhibitor) variant (Fragment)								None	None	None	0	1	0				7734500									0.820622	6.60374	0.024667	86.833	71.394	86.833													0.820622	6.60374	0.024667	86.833
600	B2R9K6	cDNA, FLJ94436, highly similar to Homo sapiens platelet derived growth factor C (PDGFC), mRNA								None	None	None	0	0	1							198600000						1	120.526	1.37605e-05	120.53	80.051	120.53
601	B2RA94	cDNA, FLJ94779								None	None	None	1	1	2	9376800			48040000			221970000	308860000				265415000	0.842327	7.27724	2.4641e-228	321.01	246.17	313.36	0.781048	5.52329	9.26097e-62	243.4									0.798123	5.96984	1.25102e-72	250.69
602	B2RA94	cDNA, FLJ94779								None	None	None	0	0	1									145220000				0.79279	5.82747	5.226e-86	258.78	192.73	258.78
603	K7EPJ4	Cartilage intermediate layer protein 2 (Cartilage intermediate layer protein 2, isoform CRA_b)	CILP2 hCG_38566							CK Unique	CK Unique	None	2	0	0		9383500	9670200							9526850			1	51.5572	4.19133e-06	100.68	94.029	51.557					1	100.678	4.19133e-06	100.68	1	51.5572	0.000934445	51.557
604	K7EPJ4	Cartilage intermediate layer protein 2 (Cartilage intermediate layer protein 2, isoform CRA_b)	CILP2 hCG_38566	0.114154	0.0377451	6.01402	0.00172005	0.0189813	0.000240877	Down	Up	Down	3	3	2	468880000	1347800000	1476800000	140910000	67953000	167100000	6189000000	7015700000		1.09783e+09	125321000	6602350000	1	208.589	5.38994e-18	208.59	185.85	208.59	1	160.531	3.32159e-05	160.53	1	170.471	6.33476e-05	170.47	1	163.427	4.27685e-05	163.43	1	163.16	4.18299e-05	163.16
605	K7EPJ4	Cartilage intermediate layer protein 2 (Cartilage intermediate layer protein 2, isoform CRA_b)	CILP2 hCG_38566	0.223036	0.00915733	14.5485	5.29025e-06	0.0153305	1.30446e-06	Down	Up	Down	3	3	2	208060000	319680000	225470000	75843000	11175000	80975000		3664000000	3641400000	251070000	5.59977e+07	3652700000	1	81.5653	5.49896e-72	254.07	210.79	81.565	1	111.388	1.19011e-05	138.45	1	152.854	5.11329e-06	152.85	1	124.302	5.49896e-72	254.07	1	72.8912	0.0128545	72.891
606	B2RAK1	cDNA, FLJ94965, highly similar to Homo sapiens leucyl/cystinyl aminopeptidase (LNPEP), mRNA								None	OA Unique	None	0	1	3				24790000			71442000	227060000	118110000			1.38871e+08	1	251.025	1.02822e-72	251.03	223.7	251.03													1	202.442	4.01666e-23	202.44
607	B2RAK1	cDNA, FLJ94965, highly similar to Homo sapiens leucyl/cystinyl aminopeptidase (LNPEP), mRNA								None	None	None	0	1	1				15934000				48815000					1	101.719	0.00325387	101.72	72.378	101.72													1	76.3258	0.0100167	76.326
608	B2RAK1	cDNA, FLJ94965, highly similar to Homo sapiens leucyl/cystinyl aminopeptidase (LNPEP), mRNA								None	None	None	0	0	0													1	93.7544	0.000534563	93.754	68.819	93.754
609	H0Y7R7	5'-nucleotidase (Fragment)	NT5E	1.77837	0.396435	16.2292	0.000529662	0.109579	9.58355e-05	None	Up	Down	2	3	3		64511000	32925000	143290000	57404000	59222000	721230000	824990000	825740000	48718000	8.66387e+07	7.90653e+08	1	80.4459	1.75778e-151	279.5	253.78	279.5					0.999962	45.6984	5.86637e-27	137.73	0.9998	39.1014	0.000594992	84.68	1	69.8114	1.00614e-116	256.49
610	H0Y7R7	5'-nucleotidase (Fragment)	NT5E					0.186115	0.064132	None	None	None	1	2	3		220240000		393820000		71009000	784010000	1675900000	1286400000		232414500	1248770000	1	147.778	3.65275e-14	193.38	155.9	147.78	1	78.9316	0.0270141	78.932	1	166.187	5.24668e-05	166.19					1	183.03	7.48095e-06	183.03
611	E9PE72	Ectonucleotide pyrophosphatase/phosphodiesterase family member 1	ENPP1							KBD Unique	None	KBD Unique	0	3	0				38185000	16654000	15326000					2.33883e+07		1	83.2061	0.023178	89.752	65.12	83.206					1	85.2117	0.0405265	85.212					1	89.7522	0.023178	89.752
612	E9PE72	Ectonucleotide pyrophosphatase/phosphodiesterase family member 1	ENPP1	3.72167	0.165811	34.7059	0.00979849	0.107234	0.0141769	None	Up	Down	3	3	3	18696000	17575000	15211000	118390000	29404000	43805000	556390000	828810000	401530000	1.71607e+07	6.38663e+07	5.95577e+08	1	98.0402	4.18125e-08	190.96	177.38	98.04	1	133.807	3.32245e-05	133.81	1	125.747	6.30293e-05	125.75	1	125.747	6.30293e-05	125.75	1	98.0402	5.53421e-05	171.85
613	B2RC09	cDNA, FLJ95794, highly similar to Homo sapiens apolipoprotein F (APOF), mRNA						0.111324	0.126629	KBD Unique	OA Unique	None	0	2	2				3962000		9821400	40411000		83402000		6891700	61906500	1	77.4314	0.000831845	87.618	70.592	77.431													1	50.8431	0.0295821	50.843
614	B2RC89	cDNA, FLJ95913, highly similar to Homo sapiens keratocan (KERA), mRNA								None	None	None	0	0	1									40972000				1	86.4978	0.001556	86.498	64.452	86.498
615	B7Z8Q7	cDNA FLJ53871, highly similar to Inter-alpha-trypsin inhibitor heavy chain H4								None	None	None	1	1	3		73641000		80469000			470950000	1680200000	1152100000			1.10108e+09	1	190.304	0	380.73	351.74	190.3					1	161.514	5.64449e-48	161.51					1	192.57	4.53584e-57	192.57
616	Q53RS1	Uncharacterized protein ADAM17 (Fragment)	ADAM17							None	None	None	0	1	0				4070400									1	90.1504	0.0137717	90.15	68.85	90.15													1	90.1504	0.0137717	90.15
617	Q53RS1	Uncharacterized protein ADAM17 (Fragment)	ADAM17							None	None	None	0	0	0													0.999652	34.5854	3.20543e-24	145.71	141.24	145.71													0.999652	34.5854	3.20543e-24	145.71
618	B2RXL4	Aquaporin	AQP12B							None	None	None	0	0	0													1	54.2757	0.0172427	54.276	14.276	54.276
619	X6R8F3	Neutrophil gelatinase-associated lipocalin	LCN2							CK Unique	None	None	2	0	1		18288000	9087400					45764000		13687700			1	88.3919	0.0107714	98.055	85.018	88.392					1	98.0545	0.0107714	98.055	1	70.5516	0.0356088	70.552
620	B3KS71	cDNA FLJ35671 fis, clone SPLEN2018180, highly similar to Cartilage-associated protein								None	None	None	0	0	1								676240000					1	216.505	3.38663e-79	216.51	198.85	216.51
621	B3KS71	cDNA FLJ35671 fis, clone SPLEN2018180, highly similar to Cartilage-associated protein								None	None	None	0	0	1								150960000					1	195.197	5.28016e-35	195.2	173.64	195.2
622	K7EP71	Heparan sulfate 2-O-sulfotransferase 1 (Fragment)	HS2ST1							None	None	None	0	1	0				12005000									1	74.5621	0.0148409	74.562	56.698	74.562													1	71.5242	0.0148409	71.524
623	C9JYM4	Golgi membrane protein 1 (Fragment)	GOLM1	1.56362	0.210308	16.9336	0.0883266	0.0923388	0.19228	None	None	None	3	2	3	42327000	44191000	20257000	66126000		45178000	359610000	1108000000	340470000	3.55917e+07	55652000	6.02693e+08	0.999755	36.1018	3.53111e-46	234.81	195.26	229.48	0.889666	9.06519	0.00461805	105.4	0.811222	6.33188	0.014337	78.939	0.88928	9.04811	0.00208661	112.75	0.842392	7.27937	1.21701e-05	135.55
624	B4DX43	cDNA FLJ52980, highly similar to CD166 antigen								None	None	None	0	0	1								90771000					1	239.191	3.37956e-77	239.19	223.05	239.19
625	B4DX43	cDNA FLJ52980, highly similar to CD166 antigen								None	None	None	0	1	0				9755600									0.999995	52.6314	3.80457e-05	125.28	78.678	125.28													0.999995	52.6314	3.80457e-05	125.28
626	B3KNV8	Polypeptide N-acetylgalactosaminyltransferase (EC 2.4.1.-) (Protein-UDP acetylgalactosaminyltransferase)				18.7749	0.0169566			CK Unique	Up	OA Unique	2	0	3	2238100	3899700					67263000	40166000	65426000	3068900		5.76183e+07	1	99.8021	0.0117113	105.57	46.362	99.802	1	83.2061	0.0239711	83.206	1	69.5982	0.0400654	69.598
627	Q6PEJ8	HP protein	HP	3.79055	0.0348027	29.9706	0.245741	0.126476	0.284313	Up	None	None	2	2	3	17285000	45223000		127640000		109300000	140630000	1821700000	847770000	31254000	118470000	936700000	1	177.427	4.21042e-133	266.94	247.22	266.94	1	118.597	4.10614e-42	185.45	1	96.8754	2.71287e-39	161.46	1	123.775	2.50871e-40	177.22	1	117.462	8.87433e-58	209.75
628	Q6PEJ8	HP protein	HP	2.86588	0.0401874	40.6439	0.203064	0.0705119	0.219727	Up	None	None	2	2	3	119880000	149130000		435260000		335690000	890230000	9684500000	5825700000	134505000	385475000	5466810000	1	137.238	7.52067e-93	269.99	235.46	253.97	1	76.192	0.00218672	105.66	1	63.4854	0.00262871	97.273					1	73.2797	0.00078589	113.76
629	Q6PEJ8	HP protein	HP	2.86588	0.0401874	40.4476	0.201831	0.070854	0.21853	Up	None	None	2	2	3	119880000	149130000		435260000		335690000	890230000	9605300000	5825700000	134505000	385475000	5440410000	1	197.629	7.52067e-93	269.99	235.46	269.99	1	100.578	0.00218672	105.66	1	88.1416	0.00262871	97.273					1	103.332	0.00078589	113.76
630	Q6PEJ8	HP protein	HP	4.8708	0.134186	47.433	0.110351	0.102688	0.135355	None	None	None	3	3	3	57992000	83152000	50013000	381260000	56078000	493750000	519950000	5532300000	3014900000	63719000	3.10363e+08	3.02238e+09	1	239.872	4.03122e-101	262.23	248	239.87	1	157.865	8.58063e-19	192.54	1	210.905	8.29094e-30	210.9	1	188.467	1.55606e-18	188.47	1	262.226	4.03122e-101	262.23
631	B3KQE1	cDNA FLJ90315 fis, clone NT2RP2001480, highly similar to Thrombospondin-3								None	None	None	1	1	3		7052400		93190000			723560000	1557300000	571690000			950850000	1	152.638	7.16446e-09	170.02	153.39	152.64					1	90.6531	0.028469	90.653	1	101.929	0.00377182	101.93	1	141.711	2.06671e-07	141.71
632	B3KQE1	cDNA FLJ90315 fis, clone NT2RP2001480, highly similar to Thrombospondin-3		10.7145	0.243989	182.752	0.185199	0.0586286	0.104915	None	None	None	2	3	3		19880000	19939000	415120000	71591000	153250000	2812400000	6793600000	1309500000	19909500	2.1332e+08	3638500000	1	336.173	1.14504e-282	336.17	300.21	336.17					1	153.946	6.54059e-27	153.95	1	121.899	9.96305e-05	121.9	1	280.17	9.25531e-136	280.17
633	Q5H9B4	Metalloproteinase inhibitor 1 (Fragment)	TIMP1	0.329555	0.00550311	5.04406	0.0408373	0.0653352	0.027793	Down	Up	Down	3	3	2	650130000	775040000	821770000	378580000	113380000	248530000		2604500000	4951300000	748980000	246830000	3777900000	1	237.526	0	365.49	302.08	237.53	1	297.201	3.78095e-157	297.2	1	365.493	0	365.49	1	336.929	1.03882e-282	336.93	1	315.13	8.01478e-203	315.13
634	Q6IAW5	CALU protein (Calumenin) (Calumenin, isoform CRA_b) (cDNA, FLJ92797, Homo sapiens calumenin (CALU), mRNA)	CALU hCG_41656 tcag7.422							None	OA Unique	OA Unique	0	0	3							131820000	326830000	176880000			2.11843e+08	1	301.486	7.33022e-201	303.7	290.93	303.7
635	B3KQQ3	cDNA PSEC0016 fis, clone NT2RM1001076, highly similar to Procollagen-lysine,2-oxoglutarate 5-dioxygenase 3				15.1448	0.252871			None	None	None	2	1	3		6705300	6554500	27772000			47886000	203310000	50029000	6629900		1.00408e+08	1	113.622	0.000997215	159.58	119.54	113.62					1	89.2472	0.014072	89.247	1	102.609	0.00806061	102.61	1	136.988	0.000994694	136.99
636	O95084	Serine protease 23 (EC 3.4.21.-) (Putative secreted protein Zsig13)	PRSS23 ZSIG13 UNQ270/PRO307							None	None	None	0	1	1				27091000				175470000					1	238.007	2.36022e-52	238.01	221.17	238.01													1	65.2948	0.0307256	65.295
637	O95084	Serine protease 23 (EC 3.4.21.-) (Putative secreted protein Zsig13)	PRSS23 ZSIG13 UNQ270/PRO307							None	None	None	0	0	0													1	69.4507	0.0247738	69.451	54.249	69.451													1	69.4507	0.0247738	69.451
638	H7BZJ3	Protein disulfide-isomerase A3 (Fragment)	PDIA3							None	None	None	0	1	1				4468100			12450000						0.984545	18.2829	2.56543e-05	132.78	120.93	132.78													0.974826	16.1581	0.000146577	127.76
639	Q8N294	cDNA FLJ33633 fis, clone BRAMY2022786, highly similar to Homo sapiens dickkopf-3 (DKK-3) mRNA		0.607593	0.529931					None	CK Unique	KBD Unique	3	3	0	7963700	12014000	38926000	23016000	4935100	7838400				1.96346e+07	1.19298e+07		1	155.711	2.65109e-31	186.78	186.78	186.78	1	74.0571	0.00527079	90.827	1	155.711	2.2621e-06	186.78	1	139.119	4.65497e-05	173.37	1	92.6749	0.000117709	123.75
640	Q8N294	cDNA FLJ33633 fis, clone BRAMY2022786, highly similar to Homo sapiens dickkopf-3 (DKK-3) mRNA								None	None	None	2	1	1		22855000	22919000	19025000			65936000			22887000			0.992027	20.9487	0.000625604	163.16	135.73	111.06					0.985747	18.3985	0.00182148	109.66	0.99038	20.1263	0.000625604	163.16	0.992027	20.9487	0.00150154	111.06
641	F5H627	Tumor necrosis factor receptor superfamily member 3	LTBR							None	None	None	0	1	1				6871200					16488000				1	93.2032	0.00246512	93.203	82.878	93.203													1	74.4602	0.00896559	74.46
642	E9PP15	Low-density lipoprotein receptor-related protein 8 (Fragment)	LRP8							None	None	None	0	0	0													0.999999	62.8278	0.023336	68.551	34.666	68.551													0.999999	62.8278	0.023336	68.551
643	Q53H91	Phospholipid transfer protein isoform a variant (Fragment)		1.87806	0.398083	14.9477	0.00806473	0.125642	0.0099358	None	Up	Down	2	2	3		30729000	9994400		25056000	51425000	372890000	265270000	274920000	20361700	38240500	304360000	1	122.344	7.60015e-120	286.4	257.6	122.34	1	215.077	1.86822e-19	215.08	1	126.765	1.53909e-59	251.34	1	129.838	4.24687e-05	129.84	1	271.143	4.60271e-102	271.14
644	Q53H91	Phospholipid transfer protein isoform a variant (Fragment)						0.128912	0.00232059	KBD Unique	OA Unique	Down	0	3	3				325790000	37199000	101660000	1074300000	1080500000	1449600000		154883000	1.20147e+09	1	197.734	6.49075e-72	252.69	217.24	197.73													1	252.689	6.49075e-72	252.69
645	B3KUI0	cDNA FLJ39945 fis, clone SPLEN2023977, highly similar to Homo sapiens CD97 antigen (CD97), transcript variant 2, mRNA								None	None	None	0	0	0													1	153.946	1.29394e-22	153.95	128.39	153.95
646	B3KUI0	cDNA FLJ39945 fis, clone SPLEN2023977, highly similar to Homo sapiens CD97 antigen (CD97), transcript variant 2, mRNA								KBD Unique	None	KBD Unique	0	3	0				9628000	9755400	12357000					1.05801e+07		0.865825	8.09764	1.82943e-60	183	147.34	88.73													0.853696	7.66048	4.28158e-14	159.22
647	B3KVV1	cDNA FLJ41563 fis, clone CTONG1000341, highly similar to THROMBOMODULIN								None	None	None	1	0	0			18698000										0.942015	12.1074	1.73909e-19	147.71	119.69	147.71					0.942015	12.1074	1.73909e-19	147.71	0.5	0	1.14943e-07	138.63	0.914509	10.2927	9.13233e-10	131.37
648	B3KVV1	cDNA FLJ41563 fis, clone CTONG1000341, highly similar to THROMBOMODULIN								None	None	None	1	0	0			18698000										0.5	0	1.14943e-07	138.63	118.86	138.63									0.5	0	1.14943e-07	138.63
649	B3KWI4	cDNA FLJ43122 fis, clone CTONG3003737, highly similar to Leucine-rich repeat-containing protein 15						0.133628	0.169866	KBD Unique	OA Unique	None	0	2	3					15483000	25809000	85579000	268820000	109110000		20646000	154503000	1	126.267	7.12501e-192	309.94	275.41	309.94
650	B3KXM6	cDNA FLJ45735 fis, clone JCMLC2000273, highly similar to Integrin alpha-M								None	None	None	0	1	0				6119300									1	117.512	3.5446e-05	138.98	111.72	138.98													1	117.512	3.5446e-05	138.98
651	B3KXM6	cDNA FLJ45735 fis, clone JCMLC2000273, highly similar to Integrin alpha-M								None	None	None	0	1	0						15342000							1	135.662	1.38842e-08	135.66	116.88	135.66
652	B3KXM6	cDNA FLJ45735 fis, clone JCMLC2000273, highly similar to Integrin alpha-M								None	None	None	0	1	0						15342000							1	135.662	1.38842e-08	135.66	116.88	135.66
653	B4DDJ5	Macrophage scavenger receptor types I and II (cDNA FLJ55770, highly similar to Macrophage scavenger receptor types I and II)	MSR1							None	None	None	0	1	0				8445900									1	96.9477	0.0175108	96.948	92.591	96.948													1	96.9477	0.0175108	96.948
654	B4DDJ5	Macrophage scavenger receptor types I and II (cDNA FLJ55770, highly similar to Macrophage scavenger receptor types I and II)	MSR1							KBD Unique	None	None	0	2	1				27684000		17691000		89492000			22687500		0.999566	33.6281	0.000577377	180.44	108.94	180.44													0.999566	33.6281	0.000577377	180.44
655	B4DDJ5	Macrophage scavenger receptor types I and II (cDNA FLJ55770, highly similar to Macrophage scavenger receptor types I and II)	MSR1							None	None	None	0	1	0				9089000									1	83.8618	0.000451584	122.26	110.77	83.862													1	122.258	0.000451584	122.26
656	B4DIF5	Cell cycle control protein								None	None	None	0	1	0				12933000									0.999742	35.8753	0.00110741	80.609	70.552	80.609													0.999742	35.8753	0.00110741	80.609
657	B4DDQ4	cDNA FLJ53707, highly similar to Lysyl oxidase homolog 2								None	None	None	0	1	0				13609000									0.967549	14.7444	6.04606e-31	180.05	171.76	180.05													0.967549	14.7444	6.04606e-31	180.05
658	Q5VVQ7	C4b-binding protein beta chain (Fragment)	C4BPB							None	None	None	0	1	1				29901000				110410000					1	151.974	0.000701755	151.97	136.31	151.97													1	150.362	0.000768446	150.36
659	B4DEC8	cDNA FLJ56340, highly similar to Beta-1,3-N-acetylglucosaminyltransferase radical fringe								None	None	None	1	1	2			1516400	1995800				21956000	11377000			16666500	0.998187	27.4087	0.0131398	92.051	31.369	76.827									0.998187	27.4087	0.0236316	76.827	0.998002	26.9856	0.0141715	88.948
660	H0YKJ9	Tetraspanin-3	TSPAN3							None	None	None	1	0	1			5037200						53630000				0.949268	12.7211	3.74767e-15	125.05	118.09	57.432									0.949268	12.7211	0.0017478	57.432
661	H0YKJ9	Tetraspanin-3	TSPAN3	1.11091	0.781658	17.5624	0.00325569	0.0632549	0.0230498	None	Up	Down	3	2	2	9852600	22730000	26222000		26054000	17497000		393890000	294610000	1.96015e+07	21775500	344250000	1	113.354	6.4113e-13	202.03	179.29	202.03	0.999885	39.3808	0.00899597	85.377	1	113.354	6.4113e-13	202.03	1	88.2522	1.57476e-05	165.63
662	B4DEW5	cDNA FLJ54049, highly similar to Multimerin-2								None	None	None	0	1	0				3810900									1	119.893	6.51642e-46	207.39	181.41	207.39													1	119.893	6.51642e-46	207.39
663	B4DGC3	cDNA FLJ57921, highly similar to Apolipoprotein D				1.18728	0.437992			None	None	None	3	1	3	1425400000	1654500000	2615400000	272760000			1996100000	2634900000	2130900000	1.89843e+09		2.25397e+09	1	184.914	0	442.7	408.65	211.75	1	215.594	8.2392e-170	287.01	1	305.5	0	370.3	1	327.46	0	442.7	1	263.125	0	389.47
664	B4DGC3	cDNA FLJ57921, highly similar to Apolipoprotein D		0.0951522	0.0041623	0.846077	0.223276	0.112463	0.0110111	Down	None	Down	2	2	2	106130000	117190000			7135400	14114000	102630000	86316000		111660000	10624700	94473000	1	146.065	7.72514e-93	265.77	253.18	237.93	1	145.655	7.72514e-93	265.77	1	138.597	3.01231e-78	258.72					1	79.1345	4.38029e-23	153.12
665	E7ETU9	Procollagen-lysine,2-oxoglutarate 5-dioxygenase 2	PLOD2					0.13529	0.121838	None	None	None	1	3	2	20860000			168380000	26488000	70491000	306910000	1000700000			88453000	653805000	1	106.199	7.38452e-14	202.2	153.11	106.2	1	136.566	0.000973555	136.57	1	113.622	0.00309919	113.62	1	144.77	7.38452e-14	144.77	1	59.4259	0.00176755	167.12
666	E7ETU9	Procollagen-lysine,2-oxoglutarate 5-dioxygenase 2	PLOD2							None	None	None	0	1	0				27880000									1	100.451	0.0169461	100.45	54.733	100.45													1	100.451	0.0169461	100.45
667	E7ETU9	Procollagen-lysine,2-oxoglutarate 5-dioxygenase 2	PLOD2	3.61323	0.0967621	29.5822	0.0371742	0.122142	0.0503781	None	Up	None	3	3	3	19156000	18095000	21914000	118730000	44056000	50991000	455480000	945110000	349640000	1.97217e+07	71259000	583410000	1	163.151	0.00184428	171.73	135.85	163.15	1	109.478	0.00867887	109.48	1	88.9479	0.0214642	88.948	1	133.235	0.00184428	133.23	1	143.703	0.002486	143.7
668	B4DHZ6	Transferrin, isoform CRA_c (cDNA FLJ54029, highly similar to Serotransferrin)	TF hCG_2023558							None	None	None	0	1	0						170970000							0.717908	4.05679	9.27491e-09	147.95	108.93	147.95
669	B4DHZ6	Transferrin, isoform CRA_c (cDNA FLJ54029, highly similar to Serotransferrin)	TF hCG_2023558	2.24099	0.434303	27.6088	0.0220384	0.0811694	0.075782	None	Up	None	3	2	3	36836000	180110000	58861000	357530000	54524000		1439400000	3755700000	2419600000	9.19357e+07	206027000	2.53823e+09	0.990779	20.3118	1.99975e-09	180.67	131.26	180.67	0.967126	14.6863	0.000181349	126.29	0.867238	8.15064	1.28319e-08	142.83	0.990779	20.3118	1.99975e-09	180.67	0.977389	16.3576	1.38238e-05	132.88
670	B4DHZ6	Transferrin, isoform CRA_c (cDNA FLJ54029, highly similar to Serotransferrin)	TF hCG_2023558	1.6825	0.327063	14.6412	0.00637113	0.114916	0.030446	None	Up	Down	3	2	3	91445000	323140000	142460000	392130000		232690000	1971800000	3611400000	2572600000	1.85682e+08	312410000	2718600000	1	165.619	0	348.73	322.02	248.23	1	145.118	6.68961e-32	185.55	1	170.544	0	348.73	1	196.61	2.75367e-106	261.31	1	205.065	1.32829e-178	290.57
671	B4DJ06	cDNA FLJ56620								None	None	None	1	1	2		10180000		19372000			98711000	101050000				99880500	1	233.369	1.09425e-65	233.37	196.52	233.37	1	145.601	5.86236e-30	145.6	1	134.207	1.08403e-17	134.21					1	189.298	9.63546e-34	189.3
672	K7EQI0	Progranulin (Fragment)	GRN							None	None	OA Unique	1	0	3			10924000				156020000	100130000	114140000			123430000	1	41.257	3.03757e-22	179.03	179.03	41.257									1	90.6544	0.000651169	90.654	1	77.3901	0.000301178	77.39
673	Q92542	Nicastrin	NCSTN KIAA0253 UNQ1874/PRO4317							None	None	None	0	1	0				14172000									0.997176	25.4785	0.00529585	87.258	66.388	87.258													0.997176	25.4785	0.00529585	87.258
674	Q92542	Nicastrin	NCSTN KIAA0253 UNQ1874/PRO4317							None	None	None	0	1	0				12646000									1	112.56	5.18287e-09	112.56	75.477	112.56													1	104.026	0.000141714	104.03
675	B4DJN0	cDNA FLJ51641, highly similar to Nicastrin								None	None	None	0	1	0				10970000									1	49.3429	0.0174006	60.246	41.789	49.343													1	60.246	0.0174006	60.246
676	Q92542	Nicastrin	NCSTN KIAA0253 UNQ1874/PRO4317							None	None	None	0	0	0													1	58.4255	0.0141504	58.425	37.225	58.425
677	B4DJQ8	cDNA FLJ55694, highly similar to Dipeptidyl-peptidase 1								None	None	None	0	0	1								17972000					1	78.6526	0.0165749	78.653	59.873	78.653
678	B4DJQ8	cDNA FLJ55694, highly similar to Dipeptidyl-peptidase 1								None	OA Unique	None	0	1	2				17582000			285920000	410990000				348455000	1	173.27	8.8763e-61	175.39	161.76	173.27													1	133.474	3.79172e-14	133.47
679	B4DU57	cDNA FLJ50051, highly similar to Carboxypeptidase-like protein X2								None	None	None	1	3	1		21934000		48243000	11279000	57384000		300340000			3.89687e+07		1	92.2127	2.65485e-05	147.95	108.93	145.99					0.999987	49.0192	0.00542124	97.813					1	64.8118	0.000112501	123.79
680	B4DPC6	cDNA FLJ51022, highly similar to Extracellular matrix protein 2								None	None	None	0	0	1							211060000						0.5	0	3.65306e-05	176.65	128.78	176.65
681	B4DPC6	cDNA FLJ51022, highly similar to Extracellular matrix protein 2		4.358	0.00130599	38.0785	0.000496044	0.114448	0.000726976	Up	Up	Down	3	3	3	29764000	39730000	57562000	173450000	164630000	215630000	1629300000	1867000000	1341800000	42352000	184570000	1612700000	0.998824	29.2912	5.644e-08	188.66	140.81	188.66	0.848891	7.49562	0.0426106	68.657	0.889666	9.06519	0.00425956	105.4	0.818973	6.55525	0.000881606	117.31	0.993147	21.6114	3.33024e-05	160.59
682	B4DLK9	cDNA FLJ56855, highly similar to Macrophage mannose receptor 1								None	None	None	0	1	0				19358000									0.999952	43.2484	9.04594e-46	208.97	195.29	208.97													0.999952	43.2484	9.04594e-46	208.97
683	H3BUU9	Cadherin-11	CDH11							None	None	None	0	1	0				19209000									0.887012	8.94895	4.18772e-06	107.75	80.249	107.75													0.878243	8.58119	0.000639577	88.551
684	B4DN67	Kin of IRRE-like protein 1 (cDNA FLJ56360, highly similar to Kin of IRRE-like protein 1)	KIRREL1							None	None	None	0	1	0				4623400									1	77.221	0.0020835	77.221	62.451	77.221													1	77.221	0.0020835	77.221
685	G3XAP6	Cartilage oligomeric matrix protein (Cartilage oligomeric matrix protein, isoform CRA_b)	COMP hCG_37043	0.11994	0.00509077	5.68857	0.0013305	0.0210844	0.000596546	Down	Up	Down	3	3	3	10311000000	17232000000	12061000000	1663300000	1231000000	1855800000	79065000000	60651000000	85574000000	1.32013e+10	1.58337e+09	7.50967e+10	1	121.107	1.31291e-298	323.61	320.97	217.29	1	121.107	1.31291e-298	323.61	0.999991	50.3247	6.21269e-131	244.21	1	105.509	2.55524e-71	192.93	1	72.1883	4.37918e-94	221.26
686	G3XAP6	Cartilage oligomeric matrix protein (Cartilage oligomeric matrix protein, isoform CRA_b)	COMP hCG_37043	0.284186	0.316032	4.85542	0.00109197	0.0585296	0.00021281	None	Up	Down	3	2	3	7822800000	41696000000	18051000000	11165000000		1636600000	112690000000	104640000000	110750000000	2.25233e+10	6400800000	109360000000	1	130.27	2.4741e-156	290.28	277.65	130.27	1	88.1627	6.56608e-12	149.23	1	89.2612	6.94128e-29	210.95	1	130.27	2.45273e-22	199.7	1	179.552	8.1673e-47	226.42
687	G3XAP6	Cartilage oligomeric matrix protein (Cartilage oligomeric matrix protein, isoform CRA_b)	COMP hCG_37043							None	None	None	0	0	0													1	131.02	2.64935e-38	131.02	129.21	131.02
688	B4DNB1	cDNA FLJ52001, highly similar to SPARC-related modular calcium-binding protein 2 (cDNA, FLJ78819, highly similar to SPARC-related modular calcium-binding protein 2)								None	None	OA Unique	1	0	2		6510400					53830000		143230000			98530000	1	221.445	9.01742e-26	221.44	131.9	221.44					1	147.909	3.97497e-05	147.91
689	B4DNE0	cDNA FLJ52573, highly similar to Elongation factor 1-alpha 1								None	None	None	0	0	0													0.997991	27.0183	0.0224642	48.568	28.187	48.568					0.997991	27.0183	0.0224642	48.568
690	B4DNE0	cDNA FLJ52573, highly similar to Elongation factor 1-alpha 1								None	None	None	0	0	0													0.999964	47.4843	0.0224642	48.568	28.187	48.568					0.999964	47.4843	0.0224642	48.568
691	B4DNG0	Olfactomedin-like protein 3 (cDNA FLJ58142, highly similar to Olfactomedin-like protein 3)	OLFML3							None	None	None	0	0	0													1	130.509	2.03812e-07	142.14	93.902	130.51					1	130.509	2.03812e-07	142.14
692	B4DNG0	Olfactomedin-like protein 3 (cDNA FLJ58142, highly similar to Olfactomedin-like protein 3)	OLFML3	4.95416	0.501262	71.3848	0.0919947	0.0694007	0.0426522	None	None	Down	2	3	3		51166000	16360000	437560000	22527000	41715000	1756600000	3910900000	1563000000	33763000	1.67267e+08	2.41017e+09	1	213.591	1.44229e-196	305.6	276.06	213.59	1	171.322	7.37945e-53	171.32	1	176.051	9.93489e-21	176.05	1	154.357	3.93545e-21	154.36	1	126.765	3.22405e-189	305.6
693	B4DNM8	cDNA FLJ53395, highly similar to Prolyl 3-hydroxylase 1								None	None	None	0	1	1						36538000			99778000				1	73.4642	1.15771e-58	238.47	196.47	73.464
694	Q6LEP5	TIMP-3 (Fragment)								None	None	None	1	0	1			91081000				291110000						1	105.808	0.0213874	105.81	74.505	105.81									1	77.9225	0.0452637	77.923
695	H3BQ21	Signal-regulatory protein beta-1 (Fragment)	SIRPB1					0.0777452	9.41067e-05	None	None	Down	1	3	2		7897800		13535000	5962900	5472300		108090000	106030000		8323400	107060000	1	140.463	4.84205e-114	238.51	193.65	238.51					0.999998	57.2459	9.53538e-05	129.89					1	78.0677	1.73728e-05	167.12
696	H3BQ21	Signal-regulatory protein beta-1 (Fragment)	SIRPB1							None	None	None	1	1	0		8961000		8179200									1	148.523	0.000886076	148.52	113.7	148.52					1	72.2432	0.0323799	72.243					1	148.523	0.000886076	148.52
697	B4DPP8	cDNA FLJ53075, highly similar to Kininogen-1								None	None	None	0	1	0				29251000									0.550626	1.57169	1.8342e-150	276.77	248.35	276.77													0.550626	1.57169	1.8342e-150	276.77
698	Q05CF8	KNG1 protein	KNG1	1.77427	0.278001	31.4219	0.0362362	0.0564659	0.039088	None	Up	Down	3	3	3	6738200	45646000	19206000	53948000	24082000	48990000	394320000	1191000000	664180000	23863400	42340000	7.49833e+08	1	171.853	4.47273e-37	199.09	149.05	171.85	1	129.156	0.000113028	129.16	1	138.25	0.0015305	138.25	1	158.79	9.50993e-06	158.79	1	199.089	4.47273e-37	199.09
699	Q05CF8	KNG1 protein	KNG1					0.161585	0.024056	KBD Unique	OA Unique	Down	0	3	3				259820000	63277000	125120000	503980000	1169900000	1100000000		1.49406e+08	9.24627e+08	0.950592	12.842	6.9084e-22	208.63	163.88	208.63	0.819333	6.56581	6.85549e-16	151.22	0.894801	9.29713	6.9084e-22	157.24					0.950592	12.842	1.66976e-18	208.63
700	B4DQZ0	cDNA FLJ57066, highly similar to Collagen alpha-1(XI) chain						0.121135	0.335398	KBD Unique	OA Unique	None	0	2	2				21342000		13746000	43711000	245950000			17544000	144830500	1	212.554	1.03819e-36	212.55	199.19	212.55													1	196.577	8.77174e-26	196.58
701	F8WCU2	Peptidyl-prolyl cis-trans isomerase FKBP7	FKBP7	3.79532	0.0133699	21.7156	0.0323881	0.174774	0.0503174	Up	Up	None	3	3	3	21631000	33084000	17999000	122680000	77789000	75504000	291580000	821790000	465660000	24238000	91991000	5.26343e+08	1	79.4662	3.59195e-06	148.13	106.13	79.466	1	70.4119	0.0157543	70.412	1	128.363	5.81121e-05	128.36	1	90.7928	0.0029341	90.793	1	105.649	0.00201769	105.65
702	H0Y928	Thioredoxin domain-containing protein 15 (Fragment)	TXNDC15							None	None	None	0	0	1								39870000					1	93.0578	0.00475409	104.22	67.775	93.058
703	B4DS89	cDNA FLJ53091, highly similar to GDNF family receptor alpha-2								None	None	None	0	0	0													0.676907	3.21201	0.000311621	83.53	51.007	83.53
704	B4DTY8	cDNA FLJ61587, highly similar to Integrin alpha-1 (Fragment)								None	None	None	0	1	0				4272400									0.987097	18.8366	0.00292369	90.926	77.522	90.926													0.987097	18.8366	0.00292369	90.926
705	B4DTY8	cDNA FLJ61587, highly similar to Integrin alpha-1 (Fragment)								None	None	None	0	1	1				23017000				73415000					1	190.339	1.50554e-17	190.34	156.47	190.34													1	129.707	2.55241e-05	129.71
706	B4DTY8	cDNA FLJ61587, highly similar to Integrin alpha-1 (Fragment)								None	None	None	0	1	1				10581000				73415000					1	190.339	1.50554e-17	190.34	156.47	190.34													1	129.707	2.55241e-05	129.71
707	B4DTY8	cDNA FLJ61587, highly similar to Integrin alpha-1 (Fragment)						0.180476	0.103086	KBD Unique	OA Unique	None	0	2	2				76952000		28269000	211860000	371160000			52610500	291510000	1	64.8188	1.74276e-91	249.14	232.55	249.14													0.99999	50.8314	3.7907e-91	245.1
708	B4DTY8	cDNA FLJ61587, highly similar to Integrin alpha-1 (Fragment)								KBD Unique	None	KBD Unique	0	3	0				26960000	18239000	28636000					2.46117e+07		1	164.791	1.17289e-10	186.36	166.07	186.36													1	164.791	1.17289e-10	186.36
709	B4DTY8	cDNA FLJ61587, highly similar to Integrin alpha-1 (Fragment)								KBD Unique	None	KBD Unique	0	2	0				11444000	4930500						8187250		1	87.3076	0.014072	89.247	40.451	87.308													1	89.2472	0.014072	89.247
710	B4DTY8	cDNA FLJ61587, highly similar to Integrin alpha-1 (Fragment)								KBD Unique	None	KBD Unique	0	3	0				27081000	36040000	52440000					3.85203e+07		1	83.0451	1.49845e-05	135.8	110.96	83.045					1	60.2551	0.0242696	60.255					1	84.0541	1.49845e-05	135.8
711	B4DTZ8	cDNA FLJ52277, highly similar to Follistatin-related protein 1								None	None	None	0	1	1				35487000				333700000					1	83.3579	0.0131398	92.051	71.426	83.358													1	92.0512	0.0131398	92.051
712	E9PJ35	Translocon-associated protein subunit beta	SSR2	5.91715	0.0822804					None	None	None	2	2	1		37033000	9849400	106150000	171260000			709090000		23441200	138705000		1	128.896	2.84007e-20	151.9	140.62	128.9					1	118.47	1.44172e-06	118.47	1	98.5073	0.000773469	98.507	1	151.902	2.84007e-20	151.9
713	F6SDV2	Tubulointerstitial nephritis antigen-like (Tubulointerstitial nephritis antigen-like 1, isoform CRA_a)	TINAGL1 hCG_41620							None	None	None	0	0	0													0.840072	10.0616	0.0130849	41.188	34.313	41.188
714	Q92791	Endoplasmic reticulum protein SC65 (Leprecan-like protein 4) (Nucleolar autoantigen No55) (Prolyl 3-hydroxylase family member 4) (Synaptonemal complex protein SC65)	P3H4 LEPREL4 NOL55 SC65							None	None	None	0	1	1				15506000					56692000				1	184.762	2.36182e-53	184.76	181.42	184.76													1	136.402	1.13595e-21	136.4
715	Q92791	Endoplasmic reticulum protein SC65 (Leprecan-like protein 4) (Nucleolar autoantigen No55) (Prolyl 3-hydroxylase family member 4) (Synaptonemal complex protein SC65)	P3H4 LEPREL4 NOL55 SC65					0.018715	0.154582	KBD Unique	OA Unique	None	0	2	2					9198500	18225000	411520000	1053800000			13711750	732660000	1	132.857	1.82925e-17	203.39	173.06	132.86													1	203.395	1.82925e-17	203.39
716	B4DX19	cDNA FLJ57644, highly similar to Serum paraoxonase/arylesterase 1						0.224017	0.0641641	KBD Unique	OA Unique	None	0	2	3				104820000		25425000	178320000	356310000	337480000		65122500	2.90703e+08	1	213.307	4.11406e-22	218.47	176.81	213.31													1	218.466	4.11406e-22	218.47
717	B4DX19	cDNA FLJ57644, highly similar to Serum paraoxonase/arylesterase 1								None	None	None	1	1	0		8420500		43852000									1	268.932	2.29569e-294	334.04	269.39	268.93					1	162.41	2.46282e-38	162.41					1	43.3802	2.29569e-294	334.04
718	B4DZ36	cDNA FLJ58441, highly similar to Attractin								None	None	None	0	1	0				6568400									1	144.289	8.6495e-12	144.29	125.88	144.29													1	144.289	8.6495e-12	144.29
719	E9PNH1	Neutral alpha-glucosidase AB (Fragment)	GANAB							None	CK Unique	None	2	1	0	6133600		7666300	8700900						6899950			1	120.09	3.51981e-05	132.78	111.91	120.09	1	96.0149	0.0055662	96.015	1	125.747	5.14462e-05	125.75	1	132.779	3.51981e-05	132.78	1	120.09	0.000551844	120.09
720	B4DZA5	Anoctamin								KBD Unique	None	KBD Unique	0	2	0					14429000	14550000					14489500		1	113.772	2.68513e-09	144.1	119.25	144.1													1	113.772	2.68513e-09	144.1
721	E9PME7	SID1 transmembrane family member 2 (Fragment)	SIDT2							None	None	None	0	1	0				12232000									1	143.424	3.80258e-14	143.42	130.86	143.42													1	143.424	3.80258e-14	143.42
722	Q05CF8	KNG1 protein	KNG1							None	None	None	0	1	0				65348000									0.587433	1.62151	1.22802e-169	281.58	246.2	281.58					0.49646	0	2.43933e-132	261.93					0.587433	1.62151	1.22802e-169	281.58
723	Q05CF8	KNG1 protein	KNG1							None	None	OA Unique	1	0	3			13646000				129070000	210600000	495230000			278300000	0.979584	16.8216	0	441.81	378.85	441.81					0.49646	0	2.43933e-132	261.93	0.735304	4.79221	2.41811e-39	174.63
724	Q05CF8	KNG1 protein	KNG1							None	None	None	0	0	1								162270000					0.530275	1.12197	5.45788e-09	122.94	115.83	122.94					0.391243	0.567833	0.00122116	83.606
725	D3DP13	Fibrinogen beta chain, isoform CRA_e	FGB hCG_2026446							None	None	None	0	1	0				35675000									1	119.291	0.000853357	119.29	107.06	119.29													1	119.291	0.000853357	119.29
726	D3DP13	Fibrinogen beta chain, isoform CRA_e	FGB hCG_2026446					2.16011	0.425622	KBD Unique	OA Unique	None	0	2	2				260760000		77710000		81901000	74790000		169235000	78345500	1	315.912	0	362.79	342.41	343.97													1	241.282	4.62954e-225	299.27
727	D3DP13	Fibrinogen beta chain, isoform CRA_e	FGB hCG_2026446							None	None	None	0	1	0				63926000									0.999927	41.3961	1.02224e-247	297.97	268.63	297.97													0.999927	41.3961	1.02224e-247	297.97
728	D3DP13	Fibrinogen beta chain, isoform CRA_e	FGB hCG_2026446							None	None	None	0	1	0				16533000									0.967498	14.7382	2.65402e-06	104.51	98.284	104.51													0.967498	14.7382	2.65402e-06	104.51
729	B4E1I8	cDNA FLJ54228, highly similar to Leucine-rich alpha-2-glycoprotein								None	OA Unique	None	0	1	2				9343400				299980000	333620000			316800000	1	125.226	9.30158e-09	147.91	106.46	125.23													1	134.592	1.94623e-06	134.59
730	B4E1I8	cDNA FLJ54228, highly similar to Leucine-rich alpha-2-glycoprotein								None	None	None	2	1	1		21698000	11790000	20225000				370680000		16744000			1	97.0329	0.0033509	150.84	137.26	97.033					1	150.837	0.00350294	150.84	1	135.843	0.00347814	135.84	1	138.895	0.0033509	138.9
731	B4E1T4	cDNA FLJ53955, highly similar to Secreted frizzled-related protein 4								None	None	None	1	1	3	14553000			63962000			176780000	380880000	249850000			269170000	1	96.2529	0.0178056	102.41	90.214	96.253	1	74.1273	0.0408906	74.127									1	102.407	0.0178056	102.41
732	B4E1T4	cDNA FLJ53955, highly similar to Secreted frizzled-related protein 4				6.30721	0.0120049			None	Up	None	3	1	3	14118000	15893000	10252000	10304000			52257000	102630000	99060000	13421000		84649000	1	134.318	4.31298e-31	182.39	174.49	134.32	1	77.6306	0.00198255	77.631	1	99.0592	0.000789856	99.059	1	47.1549	0.0230398	47.155	1	83.0632	2.69108e-08	118.52
733	B4E216	cDNA FLJ57339, highly similar to Complement C3								None	None	None	0	0	0													1	65.6768	0.000731805	74.769	54.106	73.21													0.999998	56.3115	0.00336096	74.769
734	B4E216	cDNA FLJ57339, highly similar to Complement C3		1.44032	0.663428	13.568	0.0637851	0.106156	0.0711809	None	None	None	3	3	3	25460000	114160000	23042000	159630000	27893000	46763000	257750000	1178200000	771050000	5.42207e+07	7.80953e+07	7.35667e+08	1	93.067	0	370.44	333.01	326.09	0.996789	25.007	6.15044e-15	134.9	0.999993	51.8522	1.64349e-34	190.24	0.986719	18.7105	2.74421e-15	139.11	0.999816	37.4326	3.90551e-30	175.73
735	B4E282	cDNA FLJ52401, highly similar to Integrin alpha-10				18.958	0.0118198			CK Unique	Up	OA Unique	3	0	3	3388400	5876200	4865100				77825000	126890000	63156000	4709900		8.92903e+07	1	136.163	2.90292e-86	265.55	216.13	265.55	0.999998	56.3206	0.00026494	123.88	1	75.4436	1.08663e-05	161.17	0.999996	53.7799	0.000146577	127.76
736	Q6WN33	Chordin-like protein 2 (Chordin-related protein 2 variant III) (Fragment)	CHRDL2 CHL2							None	None	None	1	0	1	35720000								80759000				1	133.149	2.56416e-45	189.94	180.48	133.15	1	189.942	2.56416e-45	189.94
737	B4E367	cDNA FLJ61564, highly similar to Plexin domain-containing protein 2								None	OA Unique	OA Unique	0	0	2							93298000	259280000				176289000	0.977815	16.442	2.63435e-200	284.9	267.67	284.9
738	B4E3G9	cDNA FLJ61084, highly similar to Angiopoietin-1								None	None	None	0	1	0				3620500									1	95.0183	0.00375287	95.018	76.273	95.018													1	95.0183	0.00375287	95.018
739	B4E3S3	cDNA FLJ56673, highly similar to Homo sapiens adipocyte-specific adhesion molecule (ASAM), mRNA								None	None	None	0	1	0						5371700							0.5	0	3.35979e-05	134.68	120.47	134.68
740	B4E3S3	cDNA FLJ56673, highly similar to Homo sapiens adipocyte-specific adhesion molecule (ASAM), mRNA								KBD Unique	None	KBD Unique	0	2	0				28780000		5371700					17075850		0.981969	17.3609	2.34914e-80	217.45	191.56	217.45													0.981969	17.3609	1.27158e-25	217.45
741	C9J6F5	Vitrin	VIT			1.05947	0.907947			None	None	None	3	1	2	1032800000	773740000	602270000			362690000		1312100000	389270000	8.02937e+08		850685000	1	86.0142	3.36702e-05	134.84	72.882	86.014	1	123.957	9.30217e-05	123.96	1	134.844	3.36702e-05	134.84	1	103.312	0.00457891	103.31	1	76.1427	0.0303588	76.143
742	B5MEF5	Sushi, nidogen and EGF-like domain-containing protein 1	SNED1							KBD Unique	None	None	0	3	1				11608000	6537400	6216900	64054000				8.12077e+06		1	156.362	4.17565e-27	156.36	138.5	156.36													1	72.1749	0.00521782	72.175
743	B7Z236	cDNA FLJ54304, highly similar to Cadherin-13								None	OA Unique	None	0	1	2				71071000			329870000		237350000			283610000	1	125.918	8.75146e-27	151.33	136.92	151.33													1	125.918	8.75146e-27	151.33
744	B7Z236	cDNA FLJ54304, highly similar to Cadherin-13								None	OA Unique	None	0	1	2				154790000				1443400000	233310000			838355000	1	111.83	0	383.26	359.3	383.26													1	111.83	0	383.26
745	B7Z236	cDNA FLJ54304, highly similar to Cadherin-13						0.080874	0.0531514	KBD Unique	OA Unique	None	0	2	3				27652000	70887000		472040000	887600000	468000000		49269500	6.09213e+08	0.993473	21.8247	1.5794e-14	170.91	147.35	170.91													0.914347	10.2837	4.53444e-07	132.59
746	B7Z236	cDNA FLJ54304, highly similar to Cadherin-13								KBD Unique	None	KBD Unique	0	2	0					70887000	26897000					48892000		0.668452	3.04524	0.000887943	99.711	79.891	99.711
747	B7Z236	cDNA FLJ54304, highly similar to Cadherin-13								None	OA Unique	None	0	1	2				14891000			40066000	47442000				43754000	1	78.692	1.01868e-05	160.18	102.59	78.692													1	160.183	1.01868e-05	160.18
748	B7Z236	cDNA FLJ54304, highly similar to Cadherin-13								None	None	None	0	1	0				41640000									1	178.946	9.64354e-53	178.95	167.94	178.95													1	178.946	9.64354e-53	178.95
749	Q49A61	MST1 protein	MST1	3.35175	0.397359	32.0456	0.05359	0.104593	0.0229219	None	None	Down	2	3	3		7258100	3921600	39327000	8423300	8457100	104860000	255340000	177190000	5589850	18735800	179130000	1	248.206	4.33128e-169	298.84	197.38	248.21					1	116.546	0.000482819	116.55	1	94.6162	0.0037534	94.616	1	257.132	1.02038e-78	257.13
750	B7Z3E3	Reticulon								None	None	None	0	0	1								65084000					1	65.3952	0.0153452	65.395	37.534	65.395
751	B7Z3E3	Reticulon								None	None	None	0	0	1								65084000					1	65.3952	0.0153452	65.395	37.534	65.395
752	C9JGT6	Prenylcysteine oxidase 1 (Fragment)	PCYOX1	1.26247	0.768999	16.7699	0.0640529	0.0752819	0.067152	None	None	None	2	2	3	41804000		20383000	61073000		17436000	364100000	784120000	416080000	31093500	39254500	5.21433e+08	1	71.2794	9.05096e-15	155.08	132.48	71.279	1	113.757	7.25405e-05	113.76	1	87.0009	0.00168957	87.001	1	117.704	2.5765e-05	117.7	1	59.2475	2.80139e-08	134.61
753	B7Z4C9	cDNA FLJ59717, highly similar to T-brain-1 protein								None	None	None	0	0	0													1	71.0845	0.00311671	71.085	45.171	71.085
754	B7Z539	cDNA FLJ56954, highly similar to Inter-alpha-trypsin inhibitor heavy chain H1						0.108498	0.180808	KBD Unique	OA Unique	None	0	2	3				66870000		40996000	175830000	856730000	458700000		53933000	4.97087e+08	1	179.21	3.01039e-05	193.86	122.52	179.21													1	146.81	0.0023659	146.81
755	B7Z539	cDNA FLJ56954, highly similar to Inter-alpha-trypsin inhibitor heavy chain H1								None	OA Unique	OA Unique	0	0	2								514140000	303400000			408770000	0.992766	23.755	1.15745e-10	123.14	110.36	108.44
756	B7Z7D2	Lysosomal acid phosphatase (cDNA FLJ51131, highly similar to Lysosomal acid phosphatase)	ACP2							None	None	None	0	1	0				26233000									0.999969	45.1245	3.83431e-12	127.01	112.23	127.01													0.999969	45.1245	3.83431e-12	127.01
757	B7Z7D2	Lysosomal acid phosphatase (cDNA FLJ51131, highly similar to Lysosomal acid phosphatase)	ACP2							None	OA Unique	None	0	1	3				11912000			47959000	56311000	32581000			45617000	1	90.1082	4.67851e-05	129.85	97.101	90.108													1	123.625	0.000132345	123.63
758	B7Z7D2	Lysosomal acid phosphatase (cDNA FLJ51131, highly similar to Lysosomal acid phosphatase)	ACP2	4.18846	0.132433	12.438	0.00284143	0.336747	0.0139032	None	Up	Down	2	3	2	6341200		11480000	58551000	27198000	26216000	106030000		115630000	8910600	3.73217e+07	110830000	1	100.756	0.000120206	142.92	89.756	100.76	1	120.155	0.00302149	120.15	1	125.817	0.000120206	125.82	1	115.714	0.00418209	115.71	1	142.923	0.00251617	142.92
759	B7Z7D2	Lysosomal acid phosphatase (cDNA FLJ51131, highly similar to Lysosomal acid phosphatase)	ACP2							KBD Unique	None	KBD Unique	0	2	0				10647000		9759900					10203450		1	80.1016	0.000271962	119.53	102.59	80.102													1	119.528	0.000271962	119.53
760	F5GX75	Vitronectin (Fragment)	VTN	4.50378	0.102056	35.1637	0.00103281	0.12808	0.010337	None	Up	Down	3	2	3	427930000	35922000	264220000	1541100000		644950000	10261000000	6926600000	8414100000	2.42691e+08	1093025000	8533900000	1	50.7765	0	501.38	464.22	50.776	0.5	0	7.02349e-294	329.6	0.5	0	0	352.97	0.5	0	7.08206e-266	319.31	0.5	0	0	349.67
761	F5GX75	Vitronectin (Fragment)	VTN	1.39385	0.608069	13.6568	0.0014093	0.102063	0.00169827	None	Up	Down	3	3	3	427930000	1182500000	264220000	1541100000	426930000	644950000	10261000000	6926600000	8414100000	6.24883e+08	8.70993e+08	8533900000	1	50.7765	0	501.38	464.22	50.776	0.5	0	7.02349e-294	329.6	0.537613	0.654637	0	352.97	0.5	0	7.08206e-266	319.31	0.816642	6.48731	0	458.06
762	E7EQ29	Beta-galactosidase	GLB1							KBD Unique	None	KBD Unique	0	2	0				11611000	7919800						9765400		1	101.082	0.00291974	109.66	83.28	109.66													1	101.082	0.00291974	109.66
763	B7Z5I3	cDNA FLJ59593								None	None	None	0	1	1				19747000				98096000					1	140.184	7.06801e-80	243.53	211.68	243.53													1	140.184	7.06801e-80	243.53
764	H7BXL0	Fibulin-2 (Fragment)	FBLN2							None	OA Unique	None	0	1	2				46595000			693120000	439200000				566160000	1	128.853	5.10606e-254	308.03	303.74	308.03													0.999997	55.9205	2.22888e-05	103.16
765	F6SFZ6	P2X purinoceptor 4	P2RX4							None	None	None	0	1	0				5465300									1	92.8379	0.0128783	92.838	59.997	92.838													1	92.8379	0.0128783	92.838
766	F6SFZ6	P2X purinoceptor 4	P2RX4							None	OA Unique	None	0	1	2				7802200				29565000	17487000			23526000	1	94.1145	0.0189483	94.114	36.651	94.114													1	81.2963	0.0247715	81.296
767	B7Z7R8	cDNA FLJ55622, highly similar to Multimerin-1								None	None	None	0	0	1								27792000					1	136.958	3.4579e-05	136.96	76.277	136.96
768	B7Z8E7	cDNA FLJ55400, highly similar to Protein OS-9								None	None	None	1	1	0		6691100		7104400									1	209.96	2.25263e-40	209.96	161.8	209.96					1	57.8855	0.0303674	57.885					1	57.8855	0.0311849	57.885
769	B7Z9G1	cDNA, FLJ78825				8.2963	0.011883			None	Up	None	2	1	2		40259000	30076000	35585000				264000000	319520000	35167500		291760000	1	63.0829	0.00712395	118.69	21.085	118.69					0.999997	55.0513	0.0176112	102.8	0.999998	57.1354	0.0175044	103.02	1	63.0829	0.00712395	118.69
770	C9JV77	Alpha-2-HS-glycoprotein	AHSG							None	None	None	0	0	1							341400000						0.576617	1.34155	8.46644e-95	212.83	186.84	212.83
771	C9JV77	Alpha-2-HS-glycoprotein	AHSG					0.191499	0.0252134	None	None	Down	1	2	3		46605000		163340000		46616000	404820000	580140000	659610000		104978000	548190000	0.999911	40.4941	0	360.82	319.6	352.15					0.994805	22.9199	4.83029e-170	287.95					0.999911	40.4941	0	352.15
772	C9JV77	Alpha-2-HS-glycoprotein	AHSG	5.46096	0.231256	46.4661	0.000174841	0.117526	0.00430456	None	Up	Down	3	2	3	7224200	40910000	24650000	228000000		36981000	1019800000	1075700000	1286500000	24261400	132490500	1.12733e+09	1	153.808	1.09796e-28	208.08	185.85	153.81	1	104.244	0.00197785	104.24	1	150.215	3.93989e-12	150.21	1	132.587	3.75972e-06	132.59	1	208.083	1.09796e-28	208.08
774	B7ZAV4	cDNA, FLJ79318, highly similar to 24-dehydrocholesterol reductase								None	None	None	0	0	0													1	85.7306	0.00368177	85.731	30.416	85.731
775	B7ZKY6	Membrane metallo-endopeptidase	MME							None	None	None	0	1	1				6602300				62752000					1	86.2877	0.00189773	136.53	98.238	86.288													1	136.53	0.00189773	136.53
776	B7ZKY6	Membrane metallo-endopeptidase	MME							None	None	None	0	0	0													1	119.224	0.00177818	119.22	82.523	119.22
777	H0YJI6	Thioredoxin domain-containing protein 16 (Fragment)	TXNDC16							None	None	None	1	0	0			3457600										1	88.1769	0.0144277	88.177	56.647	88.177	1	87.3076	0.0144522	87.308					1	88.1769	0.0144277	88.177
778	B7ZMJ3	ADAMTSL4 protein	ADAMTSL4							None	OA Unique	None	0	1	3				271490000			543550000	1000900000	735970000			760140000	1	265.611	3.37351e-159	274.2	236.86	265.61									1	181.664	2.75241e-56	181.66	1	259.546	4.87778e-79	259.55
779	B7ZMJ3	ADAMTSL4 protein	ADAMTSL4			13.0697	1.90522e-05			None	Up	None	3	1	2	11302000	22386000	20520000	23126000			235230000	237090000		1.80693e+07		236160000	1	113.256	0.00202077	123.98	70.274	113.26	1	75.8249	0.030011	75.825	1	88.9479	0.0214642	88.948	1	104.014	0.0127569	104.01	1	85.666	0.0229403	85.666
780	B8ZZC1	Fibulin-7	FBLN7	0.552153	0.162705	9.30383	0.00867235	0.0593469	0.00748845	None	Up	Down	3	3	3	132390000	148700000	132730000	145730000	27054000	55708000	1304400000	1686000000	859710000	137940000	76164000	1283370000	1	159.669	4.21611e-77	230.71	214.48	159.67	1	111.989	1.1058e-05	111.99	1	198.903	3.22155e-50	198.9	1	228.146	7.28142e-77	228.15	1	230.71	4.21611e-77	230.71
781	H7C248	Lysyl oxidase homolog 3 (Fragment)	LOXL3							None	None	None	0	0	1								36382000					1	147.18	4.05721e-20	147.18	130.15	147.18
782	E1A689	Mutant Apo B 100								None	None	None	0	1	0				163390000									1	179.834	1.16973e-65	201.95	171.4	179.83													1	201.954	6.17314e-30	201.95
783	E1A689	Mutant Apo B 100						0.295289	0.0642754	None	None	None	1	3	2		10197000		160980000	11329000	40817000	244630000	236540000			71042000	240585000	1	231.446	1.55159e-100	266.97	238.01	266.97					1	89.3113	0.00279961	92.99					1	218.567	9.35319e-72	248.77
784	E1A689	Mutant Apo B 100						0.0888714	0.0376522	KBD Unique	OA Unique	Down	0	3	3				149520000	56006000	72925000	987640000	1606800000	538750000		92817000	1.0444e+09	1	117.375	9.34017e-05	117.37	91.251	117.37													1	56.2147	0.0226065	56.215
785	E1A689	Mutant Apo B 100								None	None	None	0	1	1				105680000				383340000					1	175.669	1.68343e-165	252.88	218.19	241.17													1	176.74	1.56035e-85	252.88
786	E1A689	Mutant Apo B 100						0.254006	0.0764148	KBD Unique	OA Unique	None	0	2	3				108170000		8076900	164690000	303670000	218120000		58123450	2.28827e+08	1	102.397	1.93985e-08	169.89	123.43	102.4													1	169.891	1.93985e-08	169.89
787	C9JA36	Sodium/potassium-transporting ATPase subunit beta-3 (Fragment)	ATP1B3							None	OA Unique	None	0	1	2				19665000				89495000	83489000			86492000	1	117.233	2.86434e-09	142.97	118.98	117.23													1	142.968	2.86434e-09	142.97
788	F5GZZ9	Scavenger receptor cysteine-rich type 1 protein M130	CD163							None	None	None	0	1	1				21286000				84849000					1	69.2757	0.00530885	94.82	79.669	69.276													1	94.8197	0.00530885	94.82
789	F5GZZ9	Scavenger receptor cysteine-rich type 1 protein M130	CD163							None	None	None	0	1	0				23486000									1	110.857	2.86434e-09	142.97	126.59	110.86													1	142.968	2.86434e-09	142.97
790	F5GZZ9	Scavenger receptor cysteine-rich type 1 protein M130	CD163							None	None	None	0	1	0				9868600									1	102.062	0.00838626	102.06	94.13	102.06													1	102.062	0.00838626	102.06
791	F5GZZ9	Scavenger receptor cysteine-rich type 1 protein M130	CD163							None	None	None	0	1	0				8029200									1	109.052	2.37089e-08	115.55	107.98	115.55													1	109.052	2.37089e-08	115.55
792	C9JSN9	Biotinidase (Fragment)	BTD							None	None	None	0	1	0				12090000									1	96.3311	0.0178689	96.331	60.451	96.331													1	96.3311	0.0178689	96.331
793	C9JV37	Prothrombin (Fragment)	F2							None	None	None	1	1	1		42332000		69437000				421080000					1	147.388	2.11967e-50	201.61	190.31	201.61					1	116.521	1.08343e-39	175.86					1	100.994	5.80234e-25	142.79
794	C9JVN1	Melanotransferrin (Fragment)	MELTF					0.0702554	0.124119	None	None	None	1	3	2	12070000			7398100	14389000	13882000	69761000	268710000			11889700	169235500	1	91.7826	0.0228404	91.853	87.497	91.783	1	61.6019	0.0415431	61.602									1	76.6045	0.0326986	76.605
795	C9JVN1	Melanotransferrin (Fragment)	MELTF							None	None	None	0	1	1						22364000	66644000000						1	135.767	0.00348131	135.77	53.488	135.77
806	Q96PQ9	Lysyl oxidase	LOX	0.713089	0.538632					None	CK Unique	KBD Unique	3	2	0	52318000	13793000	48325000		26042000	28360000				3.81453e+07	27201000		1	95.4585	0.000469737	103.17	94.462	103.17	1	79.3322	0.00141138	86.727	0.999957	43.6517	0.023086	47.814	1	95.4585	0.000469737	103.17
807	Q96PQ9	Lysyl oxidase	LOX	1.50955	0.190047	10.6532	0.00653268	0.141698	0.0080131	None	Up	Down	3	3	3	12509000	20344000	26176000	21169000	38407000	29531000	141250000	222450000	265150000	1.96763e+07	2.97023e+07	2.09617e+08	1	157.568	3.04824e-25	157.85	142.34	157.57	1	78.9872	0.00166739	78.987	1	94.4498	0.000944322	94.45	1	114.02	4.82934e-06	114.02	1	118.964	3.40505e-08	118.96
808	D2Y6X4	NADH dehydrogenase subunit 4 (EC 1.6.5.3) (Fragment)	ND4							None	None	None	0	0	0													0.939297	11.8959	0.022984	57.203	24.597	57.203
809	H7C5U2	Integrin beta (Fragment)	ITGB5							None	None	None	0	1	0				11239000									0.99934	31.7993	3.15943e-15	141.22	132.93	141.22													0.99934	31.7993	3.15943e-15	141.22
810	H7C5U2	Integrin beta (Fragment)	ITGB5							None	None	None	0	0	1								61262000					1	211.57	6.06193e-57	211.57	204.84	211.57
811	H7C5U2	Integrin beta (Fragment)	ITGB5							None	None	None	0	1	0				9215400									1	76.4173	0.00200127	76.417	66.93	76.417													1	76.4173	0.00200127	76.417
812	H7C5U2	Integrin beta (Fragment)	ITGB5							None	None	None	0	1	0				61441000									1	125.252	1.16012e-16	155.51	44.877	125.25	1	155.51	1.16012e-16	155.51	1	154.013	1.49937e-16	154.01	1	143.853	2.27303e-10	143.85	1	154.35	0.045721	154.35
813	Q8WWJ8	Integrin beta								None	OA Unique	None	0	1	2				34950000				152560000	143370000			147965000	1	167.179	4.82028e-12	190.15	151.13	167.18													1	190.152	4.82028e-12	190.15
814	Q8WWJ8	Integrin beta								KBD Unique	None	KBD Unique	0	2	0				59445000		36293000					47869000		0.999834	37.7963	4.91606e-148	295.34	272.02	295.34													0.999834	37.7963	4.91606e-148	295.34
815	D3DTX7	Collagen, type I, alpha 1, isoform CRA_a	COL1A1 hCG_29609							KBD Unique	None	KBD Unique	0	2	0				11763000	8773900						10268450		1	158.519	1.91552e-47	170.56	138.28	158.52													1	170.558	1.91552e-47	170.56
816	D6RD17	Immunoglobulin J chain (Fragment)	JCHAIN							None	OA Unique	None	0	1	3				144570000			238490000	395920000	444410000			3.59607e+08	1	172.981	1.07567e-05	180.67	154.16	172.98													1	148.321	2.58329e-05	148.32
817	D6RDV5	Ephrin-A5	EFNA5							None	None	None	2	1	1		15928000	4679400	8973500			94641000			10303700			0.998042	27.0741	5.87619e-05	126.82	99.71	95.09					0.995385	23.3381	0.00508366	100.02	0.995479	23.4278	0.00491696	101.11	0.802985	6.10209	0.00513943	99.653
818	D6W633	Protein tyrosine phosphatase, receptor type, S, isoform CRA_a	PTPRS hCG_23499							None	None	None	1	1	1	3029800			10208000				23752000					1	98.4429	2.76566e-08	118.37	108.45	98.443	1	43.8232	0.045792	43.823									1	118.368	2.76566e-08	118.37
819	D6W633	Protein tyrosine phosphatase, receptor type, S, isoform CRA_a	PTPRS hCG_23499							None	None	None	1	0	0		9032300											1	123.948	0.00163941	123.95	99.605	123.95					1	123.948	0.00163941	123.95
820	D9MWI3	Prostaglandin-endoperoxidase synthase 2 (EC 1.14.99.1) (Fragment)	PTGS2							None	None	None	1	0	0		15092000											1	113.068	0.000213681	113.07	99.163	113.07					1	113.068	0.000213681	113.07
821	D9ZGF2	Collagen, type VI, alpha 3 (Epididymis secretory sperm binding protein)	COL6A3					0.256248	0.0135424	None	None	Down	1	3	3		34860000		1263600000	522910000	284510000	2254600000	2391500000	3436000000		690340000	2.69403e+09	1	166.386	6.15772e-15	182.92	164.14	182.92					1	127.91	1.26526e-07	138.24	1	125.706	1.86404e-13	136.27	1	87.798	0.00304749	96.103
822	D9ZGF2	Collagen, type VI, alpha 3 (Epididymis secretory sperm binding protein)	COL6A3	34.2759	0.192297	111.637	2.54604e-05	0.307031	0.0239178	None	Up	Down	3	3	3	19316000	77737000	45188000	3638400000	568860000	668180000	5743200000	4932300000	5203800000	4.74137e+07	1.62515e+09	5293100000	1	424.804	0	445.76	374.82	424.8	1	297.885	1.21692e-167	297.88	1	365.157	0	365.16	1	350.537	0	350.54	1	238.122	0	445.76
823	D9ZGF2	Collagen, type VI, alpha 3 (Epididymis secretory sperm binding protein)	COL6A3					0.25739	0.0235765	None	None	Down	1	3	3	6487500			345810000	111330000	109570000	487610000	936630000	777520000		1.88903e+08	733920000	1	114.186	0.000311055	133.57	90.327	114.19	1	73.985	0.0290555	73.985	1	73.985	0.0376705	73.985					1	123.86	0.000311055	123.86
824	D9ZGF2	Collagen, type VI, alpha 3 (Epididymis secretory sperm binding protein)	COL6A3							KBD Unique	None	None	0	2	1				134720000		110790000		309690000			122755000		1	68.4451	1.47575e-79	243.23	229.91	68.445													1	68.4451	7.35937e-47	210.43
825	D9ZGF2	Collagen, type VI, alpha 3 (Epididymis secretory sperm binding protein)	COL6A3							KBD Unique	None	None	0	2	1				134720000		110790000		309690000			122755000		1	68.4451	1.47575e-79	243.23	229.91	68.445													1	68.4451	7.35937e-47	210.43
826	D9ZGF2	Collagen, type VI, alpha 3 (Epididymis secretory sperm binding protein)	COL6A3							None	None	None	0	1	0						67358000							0.999999	61.6888	4.49389e-27	134.9	92.259	134.9
827	D9ZGF2	Collagen, type VI, alpha 3 (Epididymis secretory sperm binding protein)	COL6A3	11.9406	0.00338033	56.6236	0.000249496	0.210878	0.000759262	Up	Up	Down	3	3	3	44291000	53154000	18867000	597540000	394180000	397120000	1939500000	2117000000	2529500000	3.87707e+07	4.62947e+08	2.19533e+09	0.99431	22.424	6.76315e-214	299.17	279.93	299.17	0.860329	7.89558	1.48888e-31	152.81	0.933214	11.4529	1.51016e-41	184.26	0.835684	7.06363	1.4187e-31	153.19	0.906965	9.88945	3.25218e-89	236.95
828	D9ZGF2	Collagen, type VI, alpha 3 (Epididymis secretory sperm binding protein)	COL6A3							None	None	OA Unique	1	0	2		16492000					1939500000		2529500000			2234500000	0.846131	6.53118	1.73664e-45	195.56	191.42	46.178					0.846131	6.53118	0.0251032	46.178
829	D9ZGF2	Collagen, type VI, alpha 3 (Epididymis secretory sperm binding protein)	COL6A3			0.156029	0.436844			None	None	None	2	1	2		70718000	1066100000			788480000	81237000		96140000	568409000		88688500	1	129.65	5.45912e-15	218.06	126.15	129.65					1	90.3698	0.0229516	90.37	1	163.985	0.000459895	163.99
830	D9ZGF2	Collagen, type VI, alpha 3 (Epididymis secretory sperm binding protein)	COL6A3	10.8753	0.0910423	32.1213	0.000618993	0.338569	0.0398714	None	Up	Down	3	3	2	14175000	20456000	9245000	286850000	73564000	116750000	429990000		509580000	1.46253e+07	1.59055e+08	469785000	1	104.056	4.67012e-105	257.35	238.08	104.06	1	119.619	2.33214e-08	119.62	1	96.718	0.00246966	96.718	1	78.7943	8.51091e-06	102.07	1	163.418	6.2928e-50	215.48
831	D9ZGF2	Collagen, type VI, alpha 3 (Epididymis secretory sperm binding protein)	COL6A3							None	None	None	0	1	0				17636000									0.842506	7.28309	2.17034e-23	206.1	171.56	206.1													0.842506	7.28309	2.17034e-23	206.1
832	D9ZGF2	Collagen, type VI, alpha 3 (Epididymis secretory sperm binding protein)	COL6A3							None	None	None	0	1	0				24283000									1	192.147	4.89655e-25	192.15	170.39	192.15													1	192.147	4.89655e-25	192.15
833	E5RIA2	Ectonucleotide pyrophosphatase/phosphodiesterase family member 2	ENPP2							None	None	None	1	3	1		9219600		20016000	10646000	28969000			218280000		19877000		1	117.036	0.00383665	117.04	79.478	117.04					1	71.3794	0.0371892	71.379					1	101.542	0.0144198	101.54
834	P35443	Thrombospondin-4	THBS4 TSP4			7.64791	0.0795311			None	None	None	3	1	3	120130000	216540000	107370000	143530000			293180000	1552200000	1550600000	1.48013e+08		1.13199e+09	1	262.684	2.78975e-120	269.14	253.75	267.23	1	194.077	6.03502e-39	200.16	1	241.812	3.6195e-90	246.53	1	197.042	1.11164e-45	207.39	1	264.424	2.78975e-120	269.14
835	E7ETN3	Uncharacterized protein								None	None	None	0	0	0													1	61.499	3.46283e-05	61.499	49.757	61.499					1	61.499	3.46283e-05	61.499
836	E7ETN3	Uncharacterized protein								None	None	None	0	0	0													1	61.499	3.46283e-05	61.499	49.757	61.499					1	61.499	3.46283e-05	61.499
837	E7ETN3	Uncharacterized protein								None	None	None	0	1	0				35725000									1	203.114	6.38468e-40	203.11	182.88	203.11													1	203.114	6.38468e-40	203.11
838	E7ETN3	Uncharacterized protein								None	OA Unique	None	0	1	2				21977000				342160000	111250000			226705000	1	263.556	3.51988e-177	292.83	274.1	263.56													1	208.465	3.05122e-45	208.47
839	E7ETN3	Uncharacterized protein								None	OA Unique	None	0	1	2				21977000				342160000	111250000			226705000	1	263.556	3.51988e-177	292.83	274.1	263.56													1	208.465	3.05122e-45	208.47
840	E7ETN3	Uncharacterized protein						0.0581415	0.107134	None	None	None	1	3	3		22400000		39100000	19289000	15103000	152640000	792040000	319340000		2.44973e+07	421340000	1	123.72	5.53913e-05	123.72	108.52	123.72					1	55.0106	0.0272878	55.011					1	95.4284	0.0016499	95.428
841	E7ETN3	Uncharacterized protein				2.78951	0.321693			None	None	None	2	1	2		51075000	18324000	50314000				141450000	52139000	34699500		96794500	1	198.314	6.54822e-40	198.31	181.81	198.31					1	175.848	3.77919e-30	175.85	1	180.316	1.90846e-31	180.32	1	190.786	6.68645e-35	190.79
842	E7ETN3	Uncharacterized protein								None	None	None	1	1	3		9373400		40717000			177080000	628650000	231570000			3.45767e+08	1	148.62	0.000879843	148.62	139.71	148.62					1	106.423	0.0058349	106.42					1	113.706	0.00203125	113.71
843	Q96HU3	FAM38A protein	FAM38A							None	None	None	0	0	1								90309000					1	120.09	0.000700395	120.09	76.282	120.09
844	E9PGV9	ATP-binding cassette sub-family G member 1	ABCG1							None	None	None	1	0	0			16629000										0.841805	7.26144	0.019194	49.973	23.164	49.973									0.841805	7.26144	0.019194	49.973
845	E9PRZ7	Stromal interaction molecule 1 (Fragment)	STIM1							KBD Unique	None	KBD Unique	0	2	0				18525000		11442000					14983500		1	73.6317	3.08106e-08	142.19	94.995	73.632													1	142.193	3.08106e-08	142.19
846	H0YE75	Latent-transforming growth factor beta-binding protein 3 (Fragment)	LTBP3							None	None	None	0	0	0													0.998848	29.3799	0.0069581	45.125	42.192	45.125
847	F2YYR6	Vascular cell adhesion molecule 1 (Fragment)	VCAM1							KBD Unique	None	KBD Unique	0	2	0				21879000		33629000					27754000		1	88.1055	2.66215e-15	124.03	115.74	124.03													1	88.1055	2.66215e-15	124.03
848	F5GXA0	Formylglycine-generating enzyme	SUMF1					0.0853023	0.10678	KBD Unique	OA Unique	None	0	2	3				8476500		7439200	40216000	139950000	99704000		7957850	93290000	1	109.236	1.04456e-09	184.36	155.2	109.24													1	123.801	0.000267947	123.8
849	F5GYM2	Protein Wnt	WNT5B							None	None	None	0	1	0				18857000									1	222.225	7.53203e-110	271.21	261.77	271.21													1	222.225	7.53203e-110	271.21
850	F8W7F7	Transmembrane emp24 domain-containing protein 4	TMED4	1.97483	0.048253	10.184	0.00389896	0.193915	0.00494843	None	Up	Down	3	3	2	40693000	64763000	22533000	70237000	83483000	99036000	495620000	373340000		42663000	84252000	434480000	1	189.439	9.20033e-36	196.62	182.6	189.44	1	154.187	8.82216e-26	154.19	1	99.508	8.76717e-32	184.7	1	157.975	3.80741e-26	157.97	1	63.0559	2.14258e-35	195.39
851	F8WAZ6	Mitochondrial-processing peptidase subunit beta	PMPCB	0.369987	0.025483	1.94193	0.00941586	0.190526	7.95733e-05	Down	None	Down	3	3	3	301320000	540130000	360620000	125860000	159730000	159160000	743760000	739370000	851200000	400690000	148250000	778110000	1	81.1906	0.00452968	114.78	69.065	81.191	1	113.696	0.00537993	113.7	1	98.9966	0.0161323	98.997	1	114.783	0.00452968	114.78	1	104.366	0.01252	104.37
852	G3V357	Ribonuclease pancreatic	RNASE1							None	None	None	1	0	1	5214500								88917000				1	215.069	2.70817e-06	215.07	99.291	215.07	1	80.2291	0.0295974	80.229
853	G3V357	Ribonuclease pancreatic	RNASE1	0.318984	0.0204042	5.78068	0.00270447	0.055181	0.00147933	Down	Up	Down	3	3	3	509460000	519090000	841420000	245000000	216790000	134700000	2941600000	3439700000	4428400000	6.23323e+08	198830000	3.60323e+09	1	126.658	4.71521e-80	241.4	195.72	126.66	1	68.5154	0.00524274	85.522	1	125.97	2.73249e-05	125.97	1	44.6158	0.00469161	110.86	1	141.084	2.65114e-46	241.4
854	Q59EE6	Latent transforming growth factor beta binding protein 2 variant (Fragment)								None	None	None	0	1	1				244690000			204350000						1	115.699	5.014e-06	130.98	127.56	115.7													1	128.035	5.014e-06	130.98
855	Q59EE6	Latent transforming growth factor beta binding protein 2 variant (Fragment)				17.1963	0.00244126			None	Up	None	3	1	3	101930000	86284000	67806000	528450000			1319600000	1868900000	1214100000	85340000		1.46753e+09	1	111.975	3.10025e-191	295.03	269.71	111.97	1	50.0294	2.84277e-39	170.27	1	165.376	5.15675e-39	165.38	1	150.642	7.49053e-45	188.98	1	194.753	3.73515e-59	215.79
856	Q59EE6	Latent transforming growth factor beta binding protein 2 variant (Fragment)								None	None	None	0	1	0				19742000									1	74.0191	2.27947e-11	124.98	116.12	124.98													1	74.0191	2.27947e-11	124.98
857	Q59EE6	Latent transforming growth factor beta binding protein 2 variant (Fragment)								None	None	None	1	0	0			46344000										0.838599	7.15648	2.66424e-58	163.19	161.24	163.19									0.838599	7.15648	2.66424e-58	163.19
858	G3XAI2	Laminin subunit beta-1 (Laminin, beta 1, isoform CRA_a)	LAMB1 hCG_17112					0.338809	0.324931	KBD Unique	OA Unique	None	0	3	3				216210000	142470000	102120000	146670000	981540000	231850000		153600000	4.53353e+08	1	161.669	1.98352e-40	229.82	176.95	161.67													1	224.578	9.63362e-32	224.58
859	G3XAI2	Laminin subunit beta-1 (Laminin, beta 1, isoform CRA_a)	LAMB1 hCG_17112							None	None	None	0	1	0				18537000									1	228.803	2.08776e-55	228.8	201.83	228.8													1	228.803	2.08776e-55	228.8
860	G3XAI2	Laminin subunit beta-1 (Laminin, beta 1, isoform CRA_a)	LAMB1 hCG_17112							None	None	None	0	1	0				10616000									1	77.0325	0.000183971	105	82.281	105													1	77.0325	0.000183971	105
861	G3XAP6	Cartilage oligomeric matrix protein (Cartilage oligomeric matrix protein, isoform CRA_b)	COMP hCG_37043							None	None	None	0	0	0													0.961562	13.9821	0.0178189	42.791	37.731	42.791
862	G3XAP6	Cartilage oligomeric matrix protein (Cartilage oligomeric matrix protein, isoform CRA_b)	COMP hCG_37043							None	None	None	2	1	1		32936000	19673000	14345000				222420000		26304500			1	267.925	1.81882e-136	282.62	267.42	267.93	1	156.796	7.67331e-28	156.8	1	282.622	1.81882e-136	282.62	1	172.755	2.91713e-14	172.76	1	153.753	1.87811e-14	153.75
863	Q7Z5M0	Collagenase 3 (Collagenase-3 deletion variant COL3-DEL)	MMP13							None	None	None	0	0	0													1	126.037	0.00235395	126.04	87.045	126.04
864	Q7Z5M0	Collagenase 3 (Collagenase-3 deletion variant COL3-DEL)	MMP13							None	OA Unique	None	0	1	2				23073000				322950000	174870000			248910000	1	166.863	1.06223e-06	185.96	140.8	166.86													1	169.577	2.00694e-05	169.58
865	H0Y4I5	Chondroadherin-like protein (Fragment)	CHADL			11.9896	0.0068145			None	Up	None	3	1	3	38596000	27856000	38283000	80876000			350890000	567630000	337210000	3.49117e+07		4.18577e+08	1	265.225	8.16224e-248	265.22	207.88	265.22	1	167.985	2.70422e-20	167.98	1	206.182	6.93014e-31	206.18	1	205.606	1.43963e-30	205.61	1	222.293	3.72386e-45	222.29
866	H0Y512	Adipocyte plasma membrane-associated protein (Fragment)	APMAP	2.67921	0.184519	18.5493	0.0251279	0.144437	0.109397	None	Up	None	3	2	2	12787000	6670700	3371400	29157000		11619000	98439000		183870000	7609700	20388000	141154500	1	172.991	8.4417e-44	188.26	157.71	172.99	1	102.4	0.00318727	102.4	1	119.386	0.000341543	119.39	1	98.1563	0.00360215	98.156	1	188.261	7.61558e-12	188.26
867	H0Y512	Adipocyte plasma membrane-associated protein (Fragment)	APMAP							None	None	None	0	1	1				15461000				47393000					1	132.973	5.94165e-29	211.67	163.23	211.67													1	132.973	5.94165e-29	211.67
868	H0Y7C8	Torsin-1B (Fragment)	TOR1B							None	None	None	0	1	0				2866600									1	82.4167	0.0104165	82.417	33.623	82.417													1	82.4167	0.0104165	82.417
869	H0YC24	Anthrax toxin receptor 1 (Fragment)	ANTXR1							KBD Unique	None	KBD Unique	0	2	0				41707000		7183600					24445300		1	146.785	6.11475e-13	146.79	125.25	146.79													1	89.542	0.0211749	89.542
870	H0YD57	CD82 antigen (Fragment)	CD82							None	None	None	0	1	1				11190000				50522000					1	79.9739	0.0074609	111.04	100.62	79.974													1	85.8127	0.0228788	85.813
871	H0YNA7	Signal peptide peptidase-like 2A (Fragment)	SPPL2A							None	OA Unique	None	0	1	2				30893000				491720000	247070000			369395000	1	143.789	1.80826e-08	178.67	155.31	143.79													1	178.666	1.80826e-08	178.67
872	H0YNA7	Signal peptide peptidase-like 2A (Fragment)	SPPL2A							None	OA Unique	None	0	1	2				25403000				491720000	247070000			369395000	1	143.789	1.80826e-08	178.67	155.31	143.79													1	178.666	1.80826e-08	178.67
873	P20702	Integrin alpha-X (CD11 antigen-like family member C) (Leu M5) (Leukocyte adhesion glycoprotein p150,95 alpha chain) (Leukocyte adhesion receptor p150,95) (CD antigen CD11c)	ITGAX CD11C							None	None	None	0	1	0				12219000									1	125.817	0.000372827	125.82	95.651	125.82													1	125.817	0.000372827	125.82
874	H7C0G1	Transmembrane protein 245 (Fragment)	TMEM245			13.4371	0.0191176			None	Up	None	3	1	3	3390600	3855300	2648600	16823000			24024000	60827000	48102000	3.29817e+06		4.43177e+07	0.999996	54.4717	0.00196705	155.84	88.812	154.49	0.998918	29.6531	0.0295673	76.1	0.99978	36.5815	0.032679	74.173	0.998352	27.822	0.0325239	74.269	0.999899	39.9542	0.0118522	105.36
875	J3KPA2	TM2 domain containing 1, isoform CRA_c (TM2 domain-containing protein 1)	TM2D1 hCG_1780983							None	None	None	0	1	0						7421500							1	111.947	0.00674781	111.95	71.844	111.95
876	M0QYS6	Urokinase plasminogen activator surface receptor (Fragment)	PLAUR							None	None	None	0	0	1								66838000					0.965331	13.0397	0.0231618	41.45	34.498	41.45
877	M0QYS6	Urokinase plasminogen activator surface receptor (Fragment)	PLAUR							None	None	None	0	0	1								66838000					0.732766	4.17024	0.0231618	41.45	34.498	41.45
878	M0QZH0	Reticulocalbin-3 (Fragment)	RCN3							None	None	None	1	1	3			6895400	87437000			378250000	819090000	544640000			580660000	1	108.444	7.36902e-133	266.46	258.06	108.44									1	59.5386	0.00731832	59.539	1	234.547	4.45985e-89	234.55
879	O00300	Tumor necrosis factor receptor superfamily member 11B (Osteoclastogenesis inhibitory factor) (Osteoprotegerin)	TNFRSF11B OCIF OPG							CK Unique	None	None	3	0	1	66327000	226660000	137540000						345720000	143509000			1	167.199	2.95781e-109	272.32	265.43	167.2	1	259.347	2.38694e-78	259.35	1	82.1708	2.95781e-109	272.32	1	71.5551	2.07123e-64	244.71	1	199.185	3.84744e-83	199.19
880	O00300	Tumor necrosis factor receptor superfamily member 11B (Osteoclastogenesis inhibitory factor) (Osteoprotegerin)	TNFRSF11B OCIF OPG			1.38496	0.53542			None	None	None	3	1	3	76222000	599270000	277770000			9605200	372830000	315920000	631480000	317754000		4.40077e+08	0.999994	52.2872	2.1173e-30	197.94	192.04	181.4	0.974863	15.8863	5.02828e-15	146.81	0.999513	33.127	2.1173e-30	197.94	0.999962	44.2416	8.34848e-26	192.6
881	O00300	Tumor necrosis factor receptor superfamily member 11B (Osteoclastogenesis inhibitory factor) (Osteoprotegerin)	TNFRSF11B OCIF OPG							None	None	None	0	0	0													0.61266	1.99127	1.61691e-05	86.367	77.866	86.367
882	O00300	Tumor necrosis factor receptor superfamily member 11B (Osteoclastogenesis inhibitory factor) (Osteoprotegerin)	TNFRSF11B OCIF OPG							None	None	None	0	0	0													0.998844	29.1627	0.00260035	68.82	59.414	68.82	0.998844	29.1627	0.00260035	68.82
883	O00300	Tumor necrosis factor receptor superfamily member 11B (Osteoclastogenesis inhibitory factor) (Osteoprotegerin)	TNFRSF11B OCIF OPG	0.0774188	0.0960865	1.77967	0.329607	0.0435018	0.0389366	None	None	Down	3	3	3	673720000	2427100000	848170000	210600000	48525000	46601000	1393100000	1837600000	3797200000	1316330000	1.01909e+08	2.34263e+09	1	228.606	1.12913e-82	245.15	224.29	228.61	1	197.315	5.29434e-52	237.27	1	62.528	3.22481e-41	232.6	1	80.2447	8.59925e-65	245.15	1	84.17	1.05951e-40	228.87
884	O00300	Tumor necrosis factor receptor superfamily member 11B (Osteoclastogenesis inhibitory factor) (Osteoprotegerin)	TNFRSF11B OCIF OPG							CK Unique	CK Unique	None	3	0	0	32421000	62808000	22645000							3.92913e+07			1	103.604	1.50149e-298	350.02	307.83	103.6	1	326.946	1.73805e-241	326.95	1	350.019	1.50149e-298	350.02	1	300.223	3.65045e-169	300.22	1	49.5946	0.0363449	49.595
885	O00468	Agrin [Cleaved into: Agrin N-terminal 110 kDa subunit; Agrin C-terminal 110 kDa subunit; Agrin C-terminal 90 kDa fragment (C90); Agrin C-terminal 22 kDa fragment (C22)]	AGRN AGRIN							None	None	None	0	1	0				4155100									1	76.0689	0.00979962	83	50.394	83													1	76.0689	0.00979962	83
886	O15031	Plexin-B2 (MM1)	PLXNB2 KIAA0315							None	None	None	0	1	0				7590000									1	136.327	3.45805e-14	136.33	129.12	136.33													1	136.327	3.45805e-14	136.33
887	O15031	Plexin-B2 (MM1)	PLXNB2 KIAA0315							None	None	None	0	1	0				18160000									1	51.2649	0.000891497	85.493	77.845	51.265													1	85.493	0.000891497	85.493
888	O15031	Plexin-B2 (MM1)	PLXNB2 KIAA0315							None	None	None	0	0	0													1	207.877	1.90602e-104	207.88	174.79	207.88													1	207.877	1.90602e-104	207.88
889	O15031	Plexin-B2 (MM1)	PLXNB2 KIAA0315							None	None	None	0	1	0				38316000									1	212.875	3.22635e-94	212.87	170.09	212.87													1	212.875	3.22635e-94	212.87
890	O15230	Laminin subunit alpha-5 (Laminin-10 subunit alpha) (Laminin-11 subunit alpha) (Laminin-15 subunit alpha)	LAMA5 KIAA0533 KIAA1907							None	None	None	0	1	1				24137000				110830000					1	187.309	2.8073e-10	187.31	140.12	187.31													1	118.483	0.000749803	118.48
891	O15230	Laminin subunit alpha-5 (Laminin-10 subunit alpha) (Laminin-11 subunit alpha) (Laminin-15 subunit alpha)	LAMA5 KIAA0533 KIAA1907							None	None	None	0	0	0													1	190.277	4.74745e-108	190.28	166.12	190.28
892	Q05DA4	p4HA2 protein	P4HA2			10.9472	0.0491355			None	Up	None	2	1	2	21226000		7062500	62086000			123230000		186450000	14144250		154840000	1	279.972	2.60642e-256	316.71	275.63	279.97	1	75.2264	0.000305005	75.226					1	81.8386	0.000135904	81.839	1	112.878	2.06546e-07	112.88
893	O43157	Plexin-B1 (Semaphorin receptor SEP)	PLXNB1 KIAA0407 PLXN5 SEP							None	None	None	0	1	0				3385600									1	71.5551	0.016511	71.555	42.828	71.555													1	71.5551	0.016511	71.555
894	O43827	Angiopoietin-related protein 7 (Angiopoietin-like factor) (Angiopoietin-like protein 7) (Cornea-derived transcript 6 protein)	ANGPTL7 CDT6 UNQ313/PRO356					0.386956	0.563647	KBD Unique	OA Unique	None	0	2	2				35512000		9585200	7823500	108720000			22548600	58271750	1	104.437	0.00203086	135.83	109.23	104.44													1	101.253	0.0146144	101.25
895	O43827	Angiopoietin-related protein 7 (Angiopoietin-like factor) (Angiopoietin-like protein 7) (Cornea-derived transcript 6 protein)	ANGPTL7 CDT6 UNQ313/PRO356					0.405942	0.568919	KBD Unique	OA Unique	None	0	2	3				427120000	51589000		114770000	1408800000	245310000		239354500	5.89627e+08	1	177.551	1.9908e-71	244.47	219.09	244.47	1	82.722	6.49148e-20	150.06									1	142.796	5.68406e-37	218.3
896	O43827	Angiopoietin-related protein 7 (Angiopoietin-like factor) (Angiopoietin-like protein 7) (Cornea-derived transcript 6 protein)	ANGPTL7 CDT6 UNQ313/PRO356							None	None	None	1	3	1	12182000			120580000	35051000	24698000		1071000000			6.01097e+07		1	64.2632	3.00408e-54	187.81	181.17	184.26	0.999758	36.2493	1.98927e-15	131.37									0.96854	15.0893	1.27099e-17	114.15
897	O43827	Angiopoietin-related protein 7 (Angiopoietin-like factor) (Angiopoietin-like protein 7) (Cornea-derived transcript 6 protein)	ANGPTL7 CDT6 UNQ313/PRO356							None	None	None	0	0	0													0.981597	17.2844	3.56308e-19	105.61	91.549	105.61
898	O43827	Angiopoietin-related protein 7 (Angiopoietin-like factor) (Angiopoietin-like protein 7) (Cornea-derived transcript 6 protein)	ANGPTL7 CDT6 UNQ313/PRO356							None	None	None	1	3	1	12182000			120580000	35051000	24698000		1071000000			6.01097e+07		0.893428	9.23419	3.00408e-54	187.81	181.17	187.81	0.879663	8.63966	1.98927e-15	131.37									0.813696	6.40643	1.27099e-17	114.15
899	O43854	EGF-like repeat and discoidin I-like domain-containing protein 3 (Developmentally-regulated endothelial cell locus 1 protein) (Integrin-binding protein DEL1)	EDIL3 DEL1							None	None	None	0	0	0													1	185.947	1.23878e-82	185.95	173.59	185.95
900	O43854	EGF-like repeat and discoidin I-like domain-containing protein 3 (Developmentally-regulated endothelial cell locus 1 protein) (Integrin-binding protein DEL1)	EDIL3 DEL1							None	None	None	0	0	0													1	185.947	1.23878e-82	185.95	173.59	185.95
901	O43854	EGF-like repeat and discoidin I-like domain-containing protein 3 (Developmentally-regulated endothelial cell locus 1 protein) (Integrin-binding protein DEL1)	EDIL3 DEL1							CK Unique	CK Unique	None	2	0	0	15936000	51403000								33669500			0.999998	57.4604	4.05918e-06	128.85	109.72	107.09	0.995615	23.561	0.0299869	59.155	0.99994	42.229	0.00212906	103.46	0.999998	57.4604	0.00211662	107.09
902	Q59H44	Lymphocyte antigen 75 variant (Fragment)								None	None	None	0	1	0				3224200									0.894845	9.29944	0.0207946	96.253	49.186	96.253													0.894845	9.29944	0.0207946	96.253
903	Q59H44	Lymphocyte antigen 75 variant (Fragment)								None	None	None	0	1	0				5111400									1	125.981	3.65051e-05	125.98	75.854	125.98													1	86.6702	0.0151986	86.67
904	O60687	Sushi repeat-containing protein SRPX2 (Sushi-repeat protein upregulated in leukemia)	SRPX2 SRPUL							None	OA Unique	OA Unique	0	0	2								67890000	88594000			78242000	0.99999	50.2444	2.3204e-45	220.99	191.44	220.99
905	O75106	Retina-specific copper amine oxidase (RAO) (EC 1.4.3.21) (Amine oxidase [copper-containing]) (Semicarbazide-sensitive amine oxidase) (SSAO)	AOC2					0.0442468	0.191266	KBD Unique	OA Unique	None	0	2	2				9636100	8374100			303550000	103490000		9005100	203520000	0.999981	47.261	1.57839e-14	166.6	135.64	144.68													0.999981	47.261	2.22102e-12	144.68
906	O75294	Chromosome 19 open reading frame 15, isoform CRA_e (R27328_1)	C19orf15 hCG_1642159							None	None	None	0	0	0													0.642344	2.54302	0.0126185	72.643	37.922	72.643	0.5	0	0.0262956	63.283									0.5	0	0.0181876	68.657
907	O75294	Chromosome 19 open reading frame 15, isoform CRA_e (R27328_1)	C19orf15 hCG_1642159							None	None	None	0	0	0													0.5	0	0.0181876	68.657	33.005	68.657	0.5	0	0.0262956	63.283									0.5	0	0.0181876	68.657
908	O75339	Cartilage intermediate layer protein 1 (CILP-1) (Cartilage intermediate-layer protein) [Cleaved into: Cartilage intermediate layer protein 1 C1; Cartilage intermediate layer protein 1 C2]	CILP UNQ602/PRO1188	0.13796	0.0549626	5.36769	0.0045727	0.0257019	0.00164178	None	Up	Down	3	3	3	48832000	178820000	177850000	27480000	12756000	15707000	718080000	567600000	890930000	1.35167e+08	1.86477e+07	7.25537e+08	1	121.93	3.45716e-05	143.22	118.4	121.93	1	123.625	0.000132345	123.63	1	143.216	3.55987e-05	143.22	1	138.233	3.51268e-05	138.23	1	141.954	3.67265e-05	141.95
909	O75339	Cartilage intermediate layer protein 1 (CILP-1) (Cartilage intermediate-layer protein) [Cleaved into: Cartilage intermediate layer protein 1 C1; Cartilage intermediate layer protein 1 C2]	CILP UNQ602/PRO1188							None	None	OA Unique	1	0	3			211020000				877750000	568920000	594510000			6.80393e+08	1	158.173	6.5169e-156	293.95	268.57	158.17	1	176.321	2.59317e-13	176.32	1	222.752	9.30857e-37	222.75	1	293.955	6.5169e-156	293.95	1	129.876	3.06216e-10	136.96
910	O75339	Cartilage intermediate layer protein 1 (CILP-1) (Cartilage intermediate-layer protein) [Cleaved into: Cartilage intermediate layer protein 1 C1; Cartilage intermediate layer protein 1 C2]	CILP UNQ602/PRO1188	0.175345	0.017852	2.97374	0.0136623	0.0589643	0.00267849	Down	Up	Down	3	3	3	8004100000	9130000000	15290000000	2541100000	1197400000	1946900000	26448000000	28855000000	41118000000	1.0808e+10	1.89513e+09	3.21403e+10	1	124.232	2.10481e-110	274.45	239.76	274.45	0.999992	50.7147	0.00164616	96.707	1	82.6719	3.52664e-12	188.25	1	75.8255	3.11277e-31	218.02	0.999942	42.3737	0.00248031	82.651
911	O75339	Cartilage intermediate layer protein 1 (CILP-1) (Cartilage intermediate-layer protein) [Cleaved into: Cartilage intermediate layer protein 1 C1; Cartilage intermediate layer protein 1 C2]	CILP UNQ602/PRO1188							None	None	None	1	1	1		5897500000			775470000		8006600000						1	82.2626	0.000478608	150.02	63.933	82.263					1	111.687	0.0344713	111.69					1	150.02	0.000478608	150.02
912	O75339	Cartilage intermediate layer protein 1 (CILP-1) (Cartilage intermediate-layer protein) [Cleaved into: Cartilage intermediate layer protein 1 C1; Cartilage intermediate layer protein 1 C2]	CILP UNQ602/PRO1188	0.0968693	0.0138094	3.51384	0.00804118	0.027568	0.00196883	Down	Up	Down	3	3	3	7474500000	15972000000	13975000000	2765400000	70583000	789010000	50698000000	32168000000	48627000000	1.24738e+10	1208331000	43831000000	1	88.0923	0	458.41	441.94	88.092	1	77.3901	4.98164e-70	207.5	1	80.9749	2.29177e-54	217.79	1	50.8827	7.51623e-280	332.36	1	58.0727	2.09979e-31	186.67
913	O75339	Cartilage intermediate layer protein 1 (CILP-1) (Cartilage intermediate-layer protein) [Cleaved into: Cartilage intermediate layer protein 1 C1; Cartilage intermediate layer protein 1 C2]	CILP UNQ602/PRO1188							None	None	None	1	0	0	14379000												1	88.0923	3.04008e-15	127.71	114	88.092	1	77.3901	3.04008e-15	127.71	1	80.9749	1.47738e-05	80.975	1	50.8827	0.00398944	65.423	1	58.0727	0.00978251	58.073
914	O75339	Cartilage intermediate layer protein 1 (CILP-1) (Cartilage intermediate-layer protein) [Cleaved into: Cartilage intermediate layer protein 1 C1; Cartilage intermediate layer protein 1 C2]	CILP UNQ602/PRO1188			3.53414	0.00573827			CK Unique	Up	OA Unique	3	0	2	32611000	64606000	60591000				204070000	167740000		5.26027e+07		185905000	1	319.436	0	455.05	416.25	455.05	1	228.375	1.68883e-228	300.56	1	222.462	1.08814e-228	303.07	1	147.787	5.8063e-90	229.1
915	O75339	Cartilage intermediate layer protein 1 (CILP-1) (Cartilage intermediate-layer protein) [Cleaved into: Cartilage intermediate layer protein 1 C1; Cartilage intermediate layer protein 1 C2]	CILP UNQ602/PRO1188							None	None	None	0	0	0													0.967322	14.7066	1.28696e-33	135.47	116.39	57.52
916	O75339	Cartilage intermediate layer protein 1 (CILP-1) (Cartilage intermediate-layer protein) [Cleaved into: Cartilage intermediate layer protein 1 C1; Cartilage intermediate layer protein 1 C2]	CILP UNQ602/PRO1188							None	None	None	0	0	0													0.5	0	1.28696e-33	135.47	116.39	135.47
917	O75339	Cartilage intermediate layer protein 1 (CILP-1) (Cartilage intermediate-layer protein) [Cleaved into: Cartilage intermediate layer protein 1 C1; Cartilage intermediate layer protein 1 C2]	CILP UNQ602/PRO1188	0.107028	0.00608627	6.96191	0.000442381	0.0153734	0.000225788	Down	Up	Down	3	3	3	3153200000	5514400000	4609800000	1041200000	104940000	274920000	35363000000	29765000000	27308000000	4425800000	4.73687e+08	30812000000	1	51.1468	1.04168e-202	308.74	261.18	51.147	1	58.6706	2.43673e-48	233.37	1	135.09	3.99266e-72	246.53	1	109.6	4.1171e-37	178	1	147.695	1.26643e-12	147.7
918	O75462	Cytokine receptor-like factor 1 (Cytokine-like factor 1) (CLF-1) (ZcytoR5)	CRLF1 UNQ288/PRO327							None	None	OA Unique	1	0	2		11289000						97802000	70311000			84056500	1	184.873	1.21067e-36	214.18	181.09	214.18					1	92.6307	1.98494e-06	123.07					1	81.5525	0.000156998	104.88
919	O75462	Cytokine receptor-like factor 1 (Cytokine-like factor 1) (CLF-1) (ZcytoR5)	CRLF1 UNQ288/PRO327							None	None	OA Unique	1	0	2		11289000						97802000	70311000			84056500	0.943759	12.2481	1.21067e-36	214.18	181.09	104.88					0.913356	10.229	1.98494e-06	123.07					0.943759	12.2481	0.000156998	104.88
920	O75462	Cytokine receptor-like factor 1 (Cytokine-like factor 1) (CLF-1) (ZcytoR5)	CRLF1 UNQ288/PRO327	0.805655	0.81333	5.43852	0.159214	0.148139	0.149637	None	None	None	3	3	3	14942000	184810000	122880000	219390000	21166000	19374000	259730000	370010000	1124900000	107544000	8.66433e+07	584880000	1	191.4	4.78428e-72	255.07	235.08	191.4	1	88.6806	0.000764896	119.53	1	108.667	2.85904e-35	226.4	1	168.738	1.91499e-05	168.74	1	250.723	2.30378e-59	250.72
921	O75462	Cytokine receptor-like factor 1 (Cytokine-like factor 1) (CLF-1) (ZcytoR5)	CRLF1 UNQ288/PRO327	0.777926	0.608346					None	CK Unique	KBD Unique	2	2	0		48681000	27834000	39277000		20246000				38257500	29761500		1	93.8124	2.81448e-05	111.18	101.42	93.812					1	76.3005	0.00179392	76.301	1	55.2672	0.0160327	55.267	1	47.2216	2.81448e-05	111.18
922	O75829	Leukocyte cell-derived chemotaxin 1 (Chondromodulin) [Cleaved into: Chondrosurfactant protein (CH-SP); Chondromodulin-1 (Chondromodulin-I) (ChM-I)]	CNMD CHMI LECT1 MYETS1							None	CK Unique	None	2	1	0		14075000	13147000	38587000						13611000			0.989152	19.9287	5.99362e-78	178.33	164.51	73.657					0.525754	0.447819	4.74308e-09	70.073	0.983663	18.0267	0.000186234	48.405	0.989152	19.9287	2.1747e-11	73.657
923	O75829	Leukocyte cell-derived chemotaxin 1 (Chondromodulin) [Cleaved into: Chondrosurfactant protein (CH-SP); Chondromodulin-1 (Chondromodulin-I) (ChM-I)]	CNMD CHMI LECT1 MYETS1			18.7302	0.0339944			None	Up	None	3	1	3	49690000	56243000	124000000	129930000			1059200000	2290700000	956780000	7.66443e+07		1435560000	0.993983	22.1803	7.54414e-149	251.04	232.3	212.66	0.968412	14.8653	1.47182e-51	158.62	0.981126	17.1586	4.26208e-77	173.05	0.993983	22.1803	4.41784e-101	212.66	0.989152	19.9287	7.18907e-24	124.37
924	O75976	Carboxypeptidase D (EC 3.4.17.22) (Metallocarboxypeptidase D) (gp180)	CPD							None	None	None	0	0	0													0.999998	56.9796	0.0126597	63.062	32.623	63.062
925	O95631	Netrin-1 (Epididymis tissue protein Li 131P)	NTN1 NTN1L							None	None	None	1	1	3		20519000		22984000			87935000	83790000	103010000			9.15783e+07	1	146.17	3.60941e-05	146.17	102.95	146.17					1	80.3185	0.00555595	80.318					1	84.8205	0.00346221	84.821
926	O95631	Netrin-1 (Epididymis tissue protein Li 131P)	NTN1 NTN1L					0.190122	0.129249	KBD Unique	OA Unique	None	0	3	3				39115000	35797000	18448000	114910000	75843000	300300000		31120000	1.63684e+08	1	268.735	0	313.01	292.7	268.73					1	313.006	0	313.01					1	211.778	9.45543e-19	211.78
927	P01023	Alpha-2-macroglobulin (Alpha-2-M) (C3 and PZP-like alpha-2-macroglobulin domain-containing protein 5)	A2M CPAMD5 FWP007							None	None	None	0	0	1									2146400				1	45.3692	1.63486e-11	100.45	72.485	45.369					1	61.7031	0.00453429	61.703
928	P01023	Alpha-2-macroglobulin (Alpha-2-M) (C3 and PZP-like alpha-2-macroglobulin domain-containing protein 5)	A2M CPAMD5 FWP007							None	None	None	0	1	0				73774000									0.999994	51.9196	7.60112e-78	198.02	182.5	198.02													0.999994	51.9196	7.60112e-78	198.02
929	P01871	Immunoglobulin heavy constant mu (Ig mu chain C region) (Ig mu chain C region BOT) (Ig mu chain C region GAL) (Ig mu chain C region OU)	IGHM	9.80071	0.419518	40.9209	0.0185575	0.239504	0.0624048	None	Up	None	2	2	3		25851000	5651400	291500000		17246000	436730000	761190000	735740000	15751200	154373000	6.44553e+08	1	138.811	0	439.77	411.41	138.81					1	275.226	4.27824e-138	275.23	1	161.841	3.70801e-29	161.84	1	334.786	0	386.49
930	P01871	Immunoglobulin heavy constant mu (Ig mu chain C region) (Ig mu chain C region BOT) (Ig mu chain C region GAL) (Ig mu chain C region OU)	IGHM					0.591011	0.294156	None	None	None	1	3	3			1768500	91457000	12165000	95761000	59259000	143820000	134280000		66461000	112453000	0.999993	51.3677	3.49771e-101	275.67	228.48	275.67					0.986867	18.7591	0.0250446	90.108	0.5	0	0.0233809	84.615	0.998611	28.5675	3.32707e-05	157.38
931	P01871	Immunoglobulin heavy constant mu (Ig mu chain C region) (Ig mu chain C region BOT) (Ig mu chain C region GAL) (Ig mu chain C region OU)	IGHM					0.591011	0.294156	None	None	None	1	3	3			1768500	91457000	12165000	95761000	59259000	143820000	134280000		66461000	112453000	0.5	0	0.000201128	187.78	170.39	75.739									0.5	0	0.0233809	84.615	0.5	0	0.0018757	131.06
932	P01871	Immunoglobulin heavy constant mu (Ig mu chain C region) (Ig mu chain C region BOT) (Ig mu chain C region GAL) (Ig mu chain C region OU)	IGHM					0.568297	0.387259	KBD Unique	OA Unique	None	0	2	2				89378000		26150000	77108000	126180000			57764000	101644000	1	213.523	2.46588e-214	305.75	294.65	213.52													1	305.75	2.46588e-214	305.75
933	P01871	Immunoglobulin heavy constant mu (Ig mu chain C region) (Ig mu chain C region BOT) (Ig mu chain C region GAL) (Ig mu chain C region OU)	IGHM							None	None	None	0	1	0				75054000									1	158.237	1.18911e-58	167.07	163.09	167.07													1	158.237	1.18911e-58	167.07
934	P01871	Immunoglobulin heavy constant mu (Ig mu chain C region) (Ig mu chain C region BOT) (Ig mu chain C region GAL) (Ig mu chain C region OU)	IGHM							None	None	None	0	1	0				75054000									1	154.021	1.18911e-58	167.07	163.09	167.07													1	154.021	1.18911e-58	167.07
935	P02458	Collagen alpha-1(II) chain (Alpha-1 type II collagen) [Cleaved into: Collagen alpha-1(II) chain; Chondrocalcin]	COL2A1					0.140739	0.10825	KBD Unique	OA Unique	None	0	2	3				455360000	512940000		1746800000	5240500000	3332900000		484150000	3.44007e+09	1	148.721	6.39275e-47	228.12	192.57	148.72	1	64.6747	1.40825e-28	160.27	1	128.962	8.79447e-10	128.96	1	127.355	5.82408e-37	167.32	1	146.586	2.05514e-27	155.43
936	V9HWP0	Pentaxin (Pentraxin)	HEL-S-92n APCS hCG_39427							None	CK Unique	None	3	1	0	380820000	217070000	119990000			128540000				2.39293e+08			1	178.068	8.74383e-90	226.56	214.93	226.56	1	159.956	6.12113e-57	190.88	1	178.068	8.74383e-90	226.56	1	149.281	5.52805e-51	172.49
937	V9HWF6	Alpha-1-acid glycoprotein	HEL-S-153w	0.692661	0.588331	5.06349	0.0224835	0.136795	0.0156004	None	Up	Down	3	3	3	229300000	1493200000	831390000	1047000000	165750000	556230000	3334500000	6077200000	3519900000	8.51297e+08	589660000	4.31053e+09	1	147.788	0	445.43	406.64	445.43	1	83.5928	0	329.73	1	90.9182	0	366.75	1	103.356	0	364.76	1	147.788	0	445.43
938	P02790	Hemopexin (Beta-1B-glycoprotein)	HPX	1.37371	0.538621	21.4691	0.0163684	0.0639855	0.0176248	None	Up	Down	3	3	3	206180000	393170000	213520000	638450000	177300000	300900000	3717700000	8448600000	5285300000	2.70957e+08	3.72217e+08	5817200000	1	212.815	5.83513e-61	212.82	178.01	212.82	1	161.19	2.88444e-14	161.19	1	117.251	6.18739e-05	117.25	1	64.9182	0.0248825	64.918	1	183.853	1.37282e-15	183.85
939	P02790	Hemopexin (Beta-1B-glycoprotein)	HPX							None	None	None	0	1	0				10565000									1	192.65	1.60202e-44	192.65	186.07	192.65													1	192.65	1.60202e-44	192.65
940	P03951	Coagulation factor XI (FXI) (EC 3.4.21.27) (Plasma thromboplastin antecedent) (PTA) [Cleaved into: Coagulation factor XIa heavy chain; Coagulation factor XIa light chain]	F11					0.0920589	0.000459501	KBD Unique	OA Unique	Down	0	3	2				44590000	14782000	24130000	318110000		286590000		27834000	302350000	0.999831	37.7272	0.00324003	111.39	92.135	111.39													0.999831	37.7272	0.00324003	111.39
941	P03951	Coagulation factor XI (FXI) (EC 3.4.21.27) (Plasma thromboplastin antecedent) (PTA) [Cleaved into: Coagulation factor XIa heavy chain; Coagulation factor XIa light chain]	F11							None	None	None	0	1	1						16362000			138640000				1	119.377	5.48117e-46	211.7	176.5	119.38									1	68.5672	0.00186119	68.567	1	121.312	2.3943e-11	121.31
942	P03951	Coagulation factor XI (FXI) (EC 3.4.21.27) (Plasma thromboplastin antecedent) (PTA) [Cleaved into: Coagulation factor XIa heavy chain; Coagulation factor XIa light chain]	F11							None	None	None	0	1	1						53052000		685920000					1	196.07	2.28156e-67	196.07	153.04	196.07
943	P04196	Histidine-rich glycoprotein (Histidine-proline-rich glycoprotein) (HPRG)	HRG							None	None	None	0	0	0													0.448948	0	0.000196216	112.15	102.5	107.74					0.333333	0	0.000196216	112.15					0.448948	0	0.00104321	107.74
944	P04196	Histidine-rich glycoprotein (Histidine-proline-rich glycoprotein) (HPRG)	HRG							None	None	None	1	1	0		26088000			87966000								0.797993	6.50327	0.000196216	112.15	102.5	92.039					0.664128	5.97109	0.000196216	112.15					0.448948	0	0.00104321	107.74
945	P04196	Histidine-rich glycoprotein (Histidine-proline-rich glycoprotein) (HPRG)	HRG							KBD Unique	None	KBD Unique	0	2	0				31768000	17812000						24790000		0.916094	10.8144	3.19736e-13	192.54	162.48	192.54					0.333333	0	0.000196216	112.15					0.816742	7.53291	0.000311611	124.86
946	P04196	Histidine-rich glycoprotein (Histidine-proline-rich glycoprotein) (HPRG)	HRG	5.1239	0.365217	19.6228	0.00724251	0.26112	0.0564205	None	Up	None	3	3	3	25443000	75638000	36323000	601680000	18474000	83890000	674010000	1228100000	794140000	4.58013e+07	2.34681e+08	898750000	1	235.205	0	338.61	319.48	308.84	1	187.894	1.14302e-119	263.59	1	221.157	3.18344e-178	296.85	1	205.378	3.85293e-137	271.64	1	240.74	1.95189e-225	314.17
947	P05164	Myeloperoxidase (MPO) (EC 1.11.2.2) [Cleaved into: Myeloperoxidase; 89 kDa myeloperoxidase; 84 kDa myeloperoxidase; Myeloperoxidase light chain; Myeloperoxidase heavy chain]	MPO			52.8921	0.178026			CK Unique	None	OA Unique	2	0	2	12763000	6940700						270630000	771540000	9851850		521085000	1	69.6021	7.61198e-11	138.55	106.21	138.55	0.999968	44.9251	0.000685133	86.479	0.999409	32.2802	0.00807822	64.83
948	P05164	Myeloperoxidase (MPO) (EC 1.11.2.2) [Cleaved into: Myeloperoxidase; 89 kDa myeloperoxidase; 84 kDa myeloperoxidase; Myeloperoxidase light chain; Myeloperoxidase heavy chain]	MPO							None	None	None	0	0	0													0.994714	22.7457	0.0101133	87.184	68.873	87.184													0.994714	22.7457	0.0101133	87.184
949	P05164	Myeloperoxidase (MPO) (EC 1.11.2.2) [Cleaved into: Myeloperoxidase; 89 kDa myeloperoxidase; 84 kDa myeloperoxidase; Myeloperoxidase light chain; Myeloperoxidase heavy chain]	MPO	3.41549	0.00943574	50.4059	0.0130363	0.0677597	0.0637977	Up	Up	None	3	2	2	15707000	14008000	5159500	42505000		36904000		440980000	730940000	1.16248e+07	39704500	585960000	1	127.514	7.11457e-09	164.65	140.62	127.51	1	88.5961	0.00645434	88.596	1	120.77	0.000542547	120.77	1	77.6404	0.0136162	77.64	1	152.538	7.11457e-09	152.54
950	P05164	Myeloperoxidase (MPO) (EC 1.11.2.2) [Cleaved into: Myeloperoxidase; 89 kDa myeloperoxidase; 84 kDa myeloperoxidase; Myeloperoxidase light chain; Myeloperoxidase heavy chain]	MPO							None	CK Unique	None	2	1	0		12089000	5310800	37461000						8699900			1	100.017	0.00187024	131.44	119.08	100.02					1	131.439	0.00187024	131.44	1	93.6488	0.019175	93.649	1	100.017	0.0154458	100.02
951	P05543	Thyroxine-binding globulin (Serpin A7) (T4-binding globulin)	SERPINA7 TBG							None	None	None	0	1	1				16857000				136540000					1	267.929	4.67264e-120	267.93	219.88	267.93													1	191.058	7.57792e-34	191.06
952	P05543	Thyroxine-binding globulin (Serpin A7) (T4-binding globulin)	SERPINA7 TBG							None	OA Unique	None	0	1	2				7438300				60811000	29968000			45389500	1	46.6804	3.93024e-12	148.33	131.26	46.68													1	112.5	0.000295378	112.5
953	Q8IVC0	Serpin peptidase inhibitor, clade D (Heparin cofactor), member 1	SERPIND1							None	CK Unique	None	2	1	0	10916000	63718000		66157000						37317000			1	101.412	0.0166508	107.59	89.827	101.41	1	76.7741	0.0361758	76.774	1	104.747	0.0166508	104.75	1	107.594	0.0322458	107.59	1	101.412	0.0182968	101.41
954	P05556	Integrin beta-1 (Fibronectin receptor subunit beta) (Glycoprotein IIa) (GPIIA) (VLA-4 subunit beta) (CD antigen CD29)	ITGB1 FNRB MDF2 MSK12							KBD Unique	None	KBD Unique	0	3	0				31630000	6978500	9605200					1.60712e+07		1	62.0349	4.36535e-17	147.26	139.67	62.035													1	84.4684	0.00216845	84.468
955	P05556	Integrin beta-1 (Fibronectin receptor subunit beta) (Glycoprotein IIa) (GPIIA) (VLA-4 subunit beta) (CD antigen CD29)	ITGB1 FNRB MDF2 MSK12					0.126832	0.0557468	KBD Unique	OA Unique	None	0	2	2				68287000		33525000		486000000	316730000		50906000	401365000	1	79.0133	3.0774e-84	254.45	207.72	79.013									1	197.298	6.51407e-72	197.3	1	92.4392	1.81357e-10	185.25
956	P05556	Integrin beta-1 (Fibronectin receptor subunit beta) (Glycoprotein IIa) (GPIIA) (VLA-4 subunit beta) (CD antigen CD29)	ITGB1 FNRB MDF2 MSK12							KBD Unique	None	KBD Unique	0	2	0				25726000		4605400					15165700		0.999993	51.4289	1.06002e-31	158.52	148.76	112.57													0.999957	43.9626	1.06002e-31	158.52
957	P05556	Integrin beta-1 (Fibronectin receptor subunit beta) (Glycoprotein IIa) (GPIIA) (VLA-4 subunit beta) (CD antigen CD29)	ITGB1 FNRB MDF2 MSK12							None	None	None	0	0	0													0.583358	1.44314	0.00450769	61.361	56.938	61.361
958	P05556	Integrin beta-1 (Fibronectin receptor subunit beta) (Glycoprotein IIa) (GPIIA) (VLA-4 subunit beta) (CD antigen CD29)	ITGB1 FNRB MDF2 MSK12							None	None	None	0	0	0													0.990725	20.2827	1.28418e-13	112.57	104.67	85.498
959	P05556	Integrin beta-1 (Fibronectin receptor subunit beta) (Glycoprotein IIa) (GPIIA) (VLA-4 subunit beta) (CD antigen CD29)	ITGB1 FNRB MDF2 MSK12							None	CK Unique	None	2	1	0		15015000	7766100	38275000						11390550			1	280.523	0	351.06	342.66	351.06					1	110.661	3.36575e-06	130.79	0.999992	50.888	0.0121664	70.628	1	280.523	0	351.06
960	P05556	Integrin beta-1 (Fibronectin receptor subunit beta) (Glycoprotein IIa) (GPIIA) (VLA-4 subunit beta) (CD antigen CD29)	ITGB1 FNRB MDF2 MSK12							None	None	None	0	1	0				9224600									0.998997	29.9834	4.31885e-08	99.34	93.498	99.34													0.998997	29.9834	4.31885e-08	99.34
961	P07357	Complement component C8 alpha chain (Complement component 8 subunit alpha)	C8A					0.251215	0.219225	KBD Unique	OA Unique	None	0	2	2				227650000		33599000		717770000	322170000		130624500	519970000	1	267.286	3.96894e-159	267.29	224.2	267.29													1	249.834	1.6114e-65	249.83
962	Q6FH10	Decorin (Bone proteoglycan II)	DCN DKFZp686J19238 hCG_24110	0.430684	0.248993	3.31065	0.0458242	0.13009	0.0716126	None	Up	None	3	2	3	60440000000	39938000000	30480000000	36420000000		1152300000	174560000000	182280000000	76385000000	4.36193e+10	18786150000	1.44408e+11	1	57.5952	2.86302e-154	260.09	241.41	57.595	1	61.1654	1.89976e-130	260.09	1	40.0859	7.71824e-154	240.59	1	224.296	3.88474e-90	232.01	1	238.352	7.62019e-116	250.27
963	Q6FH10	Decorin (Bone proteoglycan II)	DCN DKFZp686J19238 hCG_24110							None	None	None	0	0	0													1	57.5952	0.000336377	74.643	57.704	57.595	1	61.1654	0.00470785	61.165	1	40.0859	0.0141355	43.156
964	Q6FH10	Decorin (Bone proteoglycan II)	DCN DKFZp686J19238 hCG_24110			1.67705	0.577923			None	None	None	2	1	2	309000000	226600000		16659000				176840000	721390000	267800000		449115000	1	99.2164	4.22459e-46	158.93	128.49	158.93	0.999969	45.0194	0.00169976	71.756	0.996687	24.6888	0.0339283	40.402	1	73.8637	1.92473e-12	103.31	0.999833	37.6266	0.0425926	40.669
965	Q6FH10	Decorin (Bone proteoglycan II)	DCN DKFZp686J19238 hCG_24110	0.567475	0.0591761	5.05368	0.000516562	0.11229	0.000287169	None	Up	Down	3	3	3	11896000000	12111000000	7440000000	6663900000	4291400000	6890100000	49378000000	48839000000	60706000000	1.04823e+10	5.94847e+09	5.29743e+10	1	146.149	0	398.14	398.14	351.15	1	67.0024	0	398.14	1	74.7968	0	337.87	1	75.2405	3.14607e-294	329.5	1	124.129	0	355.19
966	Q6FH10	Decorin (Bone proteoglycan II)	DCN DKFZp686J19238 hCG_24110	0.0692699	0.444217	0.643436	0.701058	0.107656	0.262063	None	None	None	2	2	3		23294000	2956500000	116990000		89420000	408430000	550630000	1916900000	1489897000	103205000	9.58653e+08	0.930132	10.9328	2.57964e-91	230.88	222.71	61.526	0.788945	5.36559	2.57964e-91	230.88	0.822152	5.48343	1.29338e-67	171.98	0.534623	1.10401	5.8419e-71	209.68	0.71587	3.34481	5.08728e-06	99.536
967	Q6FH10	Decorin (Bone proteoglycan II)	DCN DKFZp686J19238 hCG_24110					0.327103	0.389949	None	None	None	1	3	3		23294000		116990000	2777600000	89420000	408430000	6797200000	1916900000		994670000	3.04084e+09	0.937612	10.773	1.83539e-143	228.19	219.89	81.345	0.925014	9.92501	1.71893e-24	121.72	0.852652	7.15933	2.12706e-05	83.788	0.507847	0.976143	5.03029e-81	171.08	0.71587	3.34481	4.37855e-95	183.63
968	Q6FH10	Decorin (Bone proteoglycan II)	DCN DKFZp686J19238 hCG_24110	0.273602	0.338519	1.46674	0.760513	0.186537	0.415038	None	None	None	3	3	3	89808000	7126100000	2723400000	2576700000	53291000	89420000	13399000000	736960000	442460000	3.3131e+09	9.0647e+08	4.85947e+09	0.999179	30.485	0	361.46	327.63	154.12	0.984782	18.5402	2.10585e-161	216.96	0.981294	17.6842	1.41743e-63	198.99	0.918065	13.5043	9.26564e-117	246.2	0.979532	17.2713	1.38665e-239	277.8
969	Q6FH10	Decorin (Bone proteoglycan II)	DCN DKFZp686J19238 hCG_24110							None	None	None	1	1	0	74708000					14410000							0.994942	23.8117	2.14406e-12	92.211	75.854	81.428	0.902995	8.83427	0.00144189	50.189	0.980609	15.2069	0.0362491	47.548	0.972065	13.6412	0.0180234	52.254	0.983922	16.9561	0.00138296	55.994
970	P08254	Stromelysin-1 (SL-1) (EC 3.4.24.17) (Matrix metalloproteinase-3) (MMP-3) (Transin-1)	MMP3 STMY1							None	OA Unique	OA Unique	0	0	2								36772000	72923000			54847500	1	82.7494	0.0107751	98.048	59.257	82.749
971	X6R5C5	Carboxypeptidase (EC 3.4.16.-)	CTSA							None	None	None	0	1	0				5976200									1	77.4653	7.35748e-15	138.5	118.93	138.5													1	77.4653	7.35748e-15	138.5
972	Q59EZ3	Insulin-like growth factor 2 receptor variant (Fragment)								None	None	None	0	1	0				18873000									0.996539	24.593	2.81949e-25	157.75	147.4	157.75													0.996539	24.593	2.81949e-25	157.75
973	Q59EZ3	Insulin-like growth factor 2 receptor variant (Fragment)								None	None	None	0	1	0				9291200									1	44.5638	0.00135065	114.4	107.51	44.564													1	78.6526	0.00135065	114.4
974	Q59EZ3	Insulin-like growth factor 2 receptor variant (Fragment)								None	None	None	0	0	1								51426000					0.999958	43.7953	0.00105032	138.1	126.61	138.1
975	Q59EZ3	Insulin-like growth factor 2 receptor variant (Fragment)								None	None	None	0	1	0				9481300									0.999997	55.5874	0.000149505	103.9	88.812	103.9													0.999997	55.5874	0.000149505	103.9
976	Q59EZ3	Insulin-like growth factor 2 receptor variant (Fragment)								None	OA Unique	OA Unique	0	0	2							29901000	110080000				69990500	1	175.211	2.31405e-29	175.21	161.98	175.21
977	P12273	Prolactin-inducible protein (Gross cystic disease fluid protein 15) (GCDFP-15) (Prolactin-induced protein) (Secretory actin-binding protein) (SABP) (gp17)	PIP GCDFP15 GPIP4							None	None	None	0	0	0													1	123.208	8.19658e-23	160.56	141.29	123.21
978	P13473	Lysosome-associated membrane glycoprotein 2 (LAMP-2) (Lysosome-associated membrane protein 2) (CD107 antigen-like family member B) (LGP-96) (CD antigen CD107b)	LAMP2							None	None	None	0	0	0													1	116.8	1.74016e-43	147.67	130.41	147.67													1	116.8	1.74016e-43	147.67
979	P13473	Lysosome-associated membrane glycoprotein 2 (LAMP-2) (Lysosome-associated membrane protein 2) (CD107 antigen-like family member B) (LGP-96) (CD antigen CD107b)	LAMP2					0.151725	0.0403406	KBD Unique	OA Unique	Down	0	2	3				273300000		218390000	1395700000	2226400000	1238900000		245845000	1.62033e+09	0.999908	40.3584	4.73954e-65	225.69	175.64	225.69	0.997769	26.5178	1.90033e-30	146.76					0.997575	26.2591	2.81598e-30	144.5	0.999908	40.3584	4.73954e-65	225.69
980	P13473	Lysosome-associated membrane glycoprotein 2 (LAMP-2) (Lysosome-associated membrane protein 2) (CD107 antigen-like family member B) (LGP-96) (CD antigen CD107b)	LAMP2	3.98134	0.072117	48.6754	0.0321844	0.0817937	0.0365808	None	Up	Down	2	2	2		13068000	6009000		30707000	45245000	380750000	547830000		9538500	37976000	464290000	1	133.582	1.8674e-08	133.58	75.388	133.58					1	66.2702	0.0433185	66.27	1	66.2702	0.0433185	66.27
981	P13473	Lysosome-associated membrane glycoprotein 2 (LAMP-2) (Lysosome-associated membrane protein 2) (CD107 antigen-like family member B) (LGP-96) (CD antigen CD107b)	LAMP2					0.2613	0.00777302	KBD Unique	OA Unique	Down	0	2	2				20307000		12176000	62384000	61929000			16241500	62156500	1	133.791	0.00356366	133.79	115.06	133.79													1	131.268	0.00391486	131.27
982	P13535	Myosin-8 (Myosin heavy chain 8) (Myosin heavy chain, skeletal muscle, perinatal) (MyHC-perinatal)	MYH8							None	CK Unique	None	2	1	0	22568000	27504000		9346100						25036000			1	64.6536	0.0167914	71.349	11.923	64.654	1	71.3491	0.0167914	71.349	1	62.8229	0.037773	62.823					1	64.6536	0.0325537	64.654
983	Q5VSQ6	Procollagen-proline, 2-oxoglutarate 4-dioxygenase (Proline 4-hydroxylase), alpha polypeptide I variant (Procollagen-proline, 2-oxoglutarate 4-dioxygenase (Proline 4-hydroxylase), alpha polypeptide I, isoform CRA_a) (Procollagen-proline, 2-oxoglutarate 4-dioxygenase (Proline 4-hydroxylase), alpha polypeptide I, isoform CRA_b) (Fragment)	P4HA1 hCG_19276							None	None	None	1	1	3	13319000			52640000			114160000	735370000	184190000			3.44573e+08	1	145.405	1.26985e-17	204.69	187.25	145.41	1	77.6744	0.0093036	77.674	1	95.0183	0.00246874	95.018	1	131.369	1.17028e-07	131.37	1	74.6109	1.26985e-17	204.69
984	P14415	Sodium/potassium-transporting ATPase subunit beta-2 (Adhesion molecule in glia) (AMOG) (Sodium/potassium-dependent ATPase subunit beta-2)	ATP1B2							None	None	None	0	0	1									58275000				1	131.284	5.64067e-16	147.95	118.47	131.28
985	P14415	Sodium/potassium-transporting ATPase subunit beta-2 (Adhesion molecule in glia) (AMOG) (Sodium/potassium-dependent ATPase subunit beta-2)	ATP1B2							None	None	None	0	1	1				11517000				56453000					1	93.0847	9.20344e-21	151.26	118.76	151.26													1	65.8288	0.000133793	120.53
986	Q59FC6	Tumor rejection antigen (Gp96) 1 variant (Fragment)				18.8072	0.00173614			None	Up	None	3	1	3	37754000	81422000	62453000	235850000			1148000000	1383600000	884330000	60543000		1.13864e+09	1	47.2368	5.60209e-157	291.57	269.34	47.237	1	147.262	3.19227e-12	147.26	1	282.916	1.73857e-136	282.92	1	132.79	1.69448e-14	152.4	1	150.683	7.30466e-13	150.68
987	Q59FC6	Tumor rejection antigen (Gp96) 1 variant (Fragment)								None	None	None	1	0	1			52915000					54680000					0.56743	1.17857	2.45944e-41	181.67	166.17	126.55									0.548556	0.846179	2.45944e-41	181.67	0.527998	0.490465	0.0150093	51.029
988	Q59FC6	Tumor rejection antigen (Gp96) 1 variant (Fragment)								None	None	None	1	1	3		67770000		251620000			311770000	573800000	404670000			430080000	0.972258	15.4464	6.16129e-239	311.92	274.13	311.92					0.912283	10.1705	1.1837e-45	196.19					0.880633	8.6791	2.79166e-102	244.78
989	P19652	Alpha-1-acid glycoprotein 2 (AGP 2) (Orosomucoid-2) (OMD 2)	ORM2 AGP2							None	None	None	0	1	0				9194800									1	102.737	0.0012493	116.55	93.968	116.55													1	102.737	0.0012493	116.55
990	P19652	Alpha-1-acid glycoprotein 2 (AGP 2) (Orosomucoid-2) (OMD 2)	ORM2 AGP2	0.861483	0.831329	21.9812	0.111066	0.0391918	0.0438553	None	None	Down	2	3	3		227310000	109490000	281120000	48501000	105600000	2110900000	6103600000	2890400000	168400000	1.45074e+08	3.70163e+09	1	110.703	1.57658e-254	326.69	299.12	315.2					1	107.655	1.57658e-254	326.69	0.999999	62.8766	3.54273e-117	271.48	1	82.4601	1.60416e-178	300.95
991	P22792	Carboxypeptidase N subunit 2 (Carboxypeptidase N 83 kDa chain) (Carboxypeptidase N large subunit) (Carboxypeptidase N polypeptide 2) (Carboxypeptidase N regulatory subunit)	CPN2 ACBP							None	None	None	0	1	0				22394000									0.688756	3.44963	0.0012871	99.407	80.869	99.407													0.688756	3.44963	0.0012871	99.407
992	P22792	Carboxypeptidase N subunit 2 (Carboxypeptidase N 83 kDa chain) (Carboxypeptidase N large subunit) (Carboxypeptidase N polypeptide 2) (Carboxypeptidase N regulatory subunit)	CPN2 ACBP							None	None	None	0	1	0				22394000									0.999999	56.6953	0.0012871	99.407	80.869	99.407													0.999999	56.6953	0.0012871	99.407
993	P23142	Fibulin-1 (FIBL-1)	FBLN1 PP213	1.75336	0.522385	38.774	0.0199271	0.0452199	0.0213303	None	Up	Down	3	3	3	138360000	627530000	24464000	823800000	80593000	481380000	15508000000	7587100000	7550100000	2.63451e+08	4.61924e+08	1.02151e+10	1	232.149	2.06924e-109	265.12	240.78	232.15	1	123.139	2.58973e-67	237.46	1	241.788	7.05987e-68	241.79	1	226.999	2.88724e-55	227	1	218.431	6.43756e-46	223.97
994	P23142	Fibulin-1 (FIBL-1)	FBLN1 PP213							None	None	None	1	0	0		35174000											1	70.0483	2.57713e-67	184.88	183.02	184.88					1	70.0483	2.57713e-67	184.88
995	P23142	Fibulin-1 (FIBL-1)	FBLN1 PP213							None	None	None	1	0	0		35174000											0.999976	46.1699	2.57713e-67	184.88	183.02	184.88					0.999976	46.1699	2.57713e-67	184.88
996	V9HWC6	Peptidyl-prolyl cis-trans isomerase (PPIase) (EC 5.2.1.8)	HEL-S-39			3.03133	0.0138487			CK Unique	Up	OA Unique	3	0	2	23784000	32560000	26914000				70267000		97988000	2.77527e+07		84127500	1	244.003	1.45613e-127	285.13	245.13	244	1	224.658	8.0304e-32	224.66	1	224.658	8.0304e-32	224.66	1	71.0845	1.45613e-127	285.13
997	P24821	Tenascin (TN) (Cytotactin) (GMEM) (GP 150-225) (Glioma-associated-extracellular matrix antigen) (Hexabrachion) (JI) (Myotendinous antigen) (Neuronectin) (Tenascin-C) (TN-C)	TNC HXB							None	OA Unique	None	0	1	2				288180000			264320000	988940000				626630000	1	291.064	6.69451e-191	291.06	262.77	291.06													1	103.022	6.80821e-89	237.46
998	P24821	Tenascin (TN) (Cytotactin) (GMEM) (GP 150-225) (Glioma-associated-extracellular matrix antigen) (Hexabrachion) (JI) (Myotendinous antigen) (Neuronectin) (Tenascin-C) (TN-C)	TNC HXB							None	None	None	0	1	1				37009000				1049100000					1	141.781	7.95542e-68	185.02	183.3	141.78													1	91.6597	5.74438e-08	91.66
999	P24821	Tenascin (TN) (Cytotactin) (GMEM) (GP 150-225) (Glioma-associated-extracellular matrix antigen) (Hexabrachion) (JI) (Myotendinous antigen) (Neuronectin) (Tenascin-C) (TN-C)	TNC HXB							None	None	None	1	1	3		56246000		1970400000			2521800000	4837400000	3834600000			3.73127e+09	1	211.404	6.0876e-101	211.4	203.37	211.4					1	183.933	6.909e-83	183.93					1	181.876	1.01119e-82	181.88
1000	P24821	Tenascin (TN) (Cytotactin) (GMEM) (GP 150-225) (Glioma-associated-extracellular matrix antigen) (Hexabrachion) (JI) (Myotendinous antigen) (Neuronectin) (Tenascin-C) (TN-C)	TNC HXB	17.2743	0.397825	150.07	0.221136	0.115108	0.155723	None	None	None	2	3	3	57568000	235880000		6250500000	183270000	1169900000	35068000000	156710000	30832000000	146724000	2.53456e+09	2.20189e+10	1	68.0334	0	345.38	335.54	68.033	1	244	6.69776e-80	244	1	250.52	1.61015e-80	250.52					1	77.5268	0	345.38
1001	P24821	Tenascin (TN) (Cytotactin) (GMEM) (GP 150-225) (Glioma-associated-extracellular matrix antigen) (Hexabrachion) (JI) (Myotendinous antigen) (Neuronectin) (Tenascin-C) (TN-C)	TNC HXB	39.7734	0.0204734	270.793	0.00661547	0.146877	0.0121735	Up	Up	Down	3	3	3	73245000	269850000	23753000	7338900000	3115100000	4136800000	26177000000	45838000000	27325000000	1.22283e+08	4863600000	3.31133e+10	1	192.564	2.93125e-228	320.07	287.74	220.21	1	142.557	1.4182e-14	163.8	1	213.323	2.0626e-72	245.48	1	105.149	1.63574e-05	120.66	1	176.51	1.07139e-136	280.36
1002	P24821	Tenascin (TN) (Cytotactin) (GMEM) (GP 150-225) (Glioma-associated-extracellular matrix antigen) (Hexabrachion) (JI) (Myotendinous antigen) (Neuronectin) (Tenascin-C) (TN-C)	TNC HXB					0.14149	0.292911	None	None	None	1	2	3		17014000		6517900000		85886000	9531900000	47357000000	13121000000		3301893000	2.33366e+10	1	102.727	0	395.9	332.58	102.73					1	168.016	3.94561e-09	168.02					1	362.644	0	362.64
1003	P24821	Tenascin (TN) (Cytotactin) (GMEM) (GP 150-225) (Glioma-associated-extracellular matrix antigen) (Hexabrachion) (JI) (Myotendinous antigen) (Neuronectin) (Tenascin-C) (TN-C)	TNC HXB					1.78736	0.516817	KBD Unique	OA Unique	None	0	3	3				1805200000	238830000	482850000	128040000	500250000	785460000		8.42293e+08	471250000	1	135.216	6.18093e-66	221.13	15.979	186.86													1	103.477	9.87514e-66	219.01
1004	P24821	Tenascin (TN) (Cytotactin) (GMEM) (GP 150-225) (Glioma-associated-extracellular matrix antigen) (Hexabrachion) (JI) (Myotendinous antigen) (Neuronectin) (Tenascin-C) (TN-C)	TNC HXB							None	None	None	0	0	0													1	66.044	0.000162996	76.733	63.545	76.733
1005	P24821	Tenascin (TN) (Cytotactin) (GMEM) (GP 150-225) (Glioma-associated-extracellular matrix antigen) (Hexabrachion) (JI) (Myotendinous antigen) (Neuronectin) (Tenascin-C) (TN-C)	TNC HXB					0.850238	0.835935	KBD Unique	OA Unique	None	0	3	2				1805200000	402290000	797530000	418720000		1937500000		1.00167e+09	1178110000	1	223.98	9.41944e-170	286.68	197.2	227.19													1	195.702	6.33801e-150	275.04
1006	P24821	Tenascin (TN) (Cytotactin) (GMEM) (GP 150-225) (Glioma-associated-extracellular matrix antigen) (Hexabrachion) (JI) (Myotendinous antigen) (Neuronectin) (Tenascin-C) (TN-C)	TNC HXB							None	None	None	0	1	1				60985000				280270000					1	171.033	2.54902e-77	173.2	164.79	171.03													1	173.199	2.54902e-77	173.2
1007	P24821	Tenascin (TN) (Cytotactin) (GMEM) (GP 150-225) (Glioma-associated-extracellular matrix antigen) (Hexabrachion) (JI) (Myotendinous antigen) (Neuronectin) (Tenascin-C) (TN-C)	TNC HXB							None	None	None	0	1	1				60985000				280270000					1	171.033	2.54902e-77	173.2	164.79	171.03													1	173.199	2.54902e-77	173.2
1008	P24821	Tenascin (TN) (Cytotactin) (GMEM) (GP 150-225) (Glioma-associated-extracellular matrix antigen) (Hexabrachion) (JI) (Myotendinous antigen) (Neuronectin) (Tenascin-C) (TN-C)	TNC HXB	13.3162	0.194238	58.1136	0.000205754	0.229142	0.00772153	None	Up	Down	3	3	3	518350000	417410000	77979000	9822600000	1514900000	2161700000	17800000000	22578000000	18534000000	337913000	4.49973e+09	1.96373e+10	1	158.011	2.56179e-145	281.32	245.83	158.01	1	172.755	1.91281e-20	172.76	1	243.403	7.09244e-70	243.4	1	153.753	5.66602e-20	153.75	1	57.0193	2.56179e-145	281.32
1009	P24821	Tenascin (TN) (Cytotactin) (GMEM) (GP 150-225) (Glioma-associated-extracellular matrix antigen) (Hexabrachion) (JI) (Myotendinous antigen) (Neuronectin) (Tenascin-C) (TN-C)	TNC HXB							None	None	None	0	1	1						155980000	302530000						1	96.4916	0.0177908	96.492	37.574	96.492
1010	P24821	Tenascin (TN) (Cytotactin) (GMEM) (GP 150-225) (Glioma-associated-extracellular matrix antigen) (Hexabrachion) (JI) (Myotendinous antigen) (Neuronectin) (Tenascin-C) (TN-C)	TNC HXB					0.182683	0.00163094	KBD Unique	OA Unique	Down	0	3	3				3471400000	1119700000	2164700000	11681000000	14550000000	10750000000		2.25193e+09	12327000000	1	107.594	0.0039957	130.77	107.46	107.59													1	117.16	0.00770001	117.16
1011	P24821	Tenascin (TN) (Cytotactin) (GMEM) (GP 150-225) (Glioma-associated-extracellular matrix antigen) (Hexabrachion) (JI) (Myotendinous antigen) (Neuronectin) (Tenascin-C) (TN-C)	TNC HXB					0.29069	0.0396498	KBD Unique	OA Unique	Down	0	3	3				239480000	15621000	24653000	301530000	301490000	359360000		9.32513e+07	3.20793e+08	1	134.369	7.36499e-67	220.65	200.53	220.65													1	126.569	1.29807e-57	206.85
1012	P24821	Tenascin (TN) (Cytotactin) (GMEM) (GP 150-225) (Glioma-associated-extracellular matrix antigen) (Hexabrachion) (JI) (Myotendinous antigen) (Neuronectin) (Tenascin-C) (TN-C)	TNC HXB					0.207878	0.148122	None	None	None	1	3	3		11638000		8178100000	2363900000	3958100000	10355000000	43271000000	16127000000		4.83337e+09	23251000000	1	101.595	4.04119e-65	245.69	214.27	101.6					1	120.574	0.000282473	120.57					1	84.4793	6.69392e-43	234.17
1013	P24821	Tenascin (TN) (Cytotactin) (GMEM) (GP 150-225) (Glioma-associated-extracellular matrix antigen) (Hexabrachion) (JI) (Myotendinous antigen) (Neuronectin) (Tenascin-C) (TN-C)	TNC HXB							None	OA Unique	OA Unique	0	0	2							160490000		128640000			144565000	1	78.0923	3.81971e-48	175.08	161.43	113.4
1014	P24821	Tenascin (TN) (Cytotactin) (GMEM) (GP 150-225) (Glioma-associated-extracellular matrix antigen) (Hexabrachion) (JI) (Myotendinous antigen) (Neuronectin) (Tenascin-C) (TN-C)	TNC HXB							None	OA Unique	None	0	1	3				89437000			160490000	184840000	128640000			157990000	1	68.3818	3.81971e-48	208.38	189.8	113.4													0.89771	9.43302	1.24888e-29	208.38
1015	Q59GD4	Collagen, type V, alpha 3 preproprotein variant (Fragment)								None	OA Unique	None	0	1	2				28709000			28835000	102880000				65857500	1	251.912	4.42906e-73	251.91	198.69	251.91													1	155.663	2.13698e-14	155.66
1016	P27487	Dipeptidyl peptidase 4 (EC 3.4.14.5) (ADABP) (Adenosine deaminase complexing protein 2) (ADCP-2) (Dipeptidyl peptidase IV) (DPP IV) (T-cell activation antigen CD26) (TP103) (CD antigen CD26) [Cleaved into: Dipeptidyl peptidase 4 membrane form (Dipeptidyl peptidase IV membrane form); Dipeptidyl peptidase 4 soluble form (Dipeptidyl peptidase IV soluble form)]	DPP4 ADCP2 CD26					0.124524	0.0631817	KBD Unique	OA Unique	None	0	2	2				47479000		11827000		290210000	186050000		29653000	238130000	0.5	0	1.05369e-14	172.26	161.21	157.58													0.5	0	3.2789e-06	127.62
1017	P27487	Dipeptidyl peptidase 4 (EC 3.4.14.5) (ADABP) (Adenosine deaminase complexing protein 2) (ADCP-2) (Dipeptidyl peptidase IV) (DPP IV) (T-cell activation antigen CD26) (TP103) (CD antigen CD26) [Cleaved into: Dipeptidyl peptidase 4 membrane form (Dipeptidyl peptidase IV membrane form); Dipeptidyl peptidase 4 soluble form (Dipeptidyl peptidase IV soluble form)]	DPP4 ADCP2 CD26					0.124524	0.0631817	KBD Unique	OA Unique	None	0	2	2				47479000		11827000		290210000	186050000		29653000	238130000	0.5	0	1.05369e-14	172.26	161.21	157.58													0.5	0	3.2789e-06	127.62
1018	P27487	Dipeptidyl peptidase 4 (EC 3.4.14.5) (ADABP) (Adenosine deaminase complexing protein 2) (ADCP-2) (Dipeptidyl peptidase IV) (DPP IV) (T-cell activation antigen CD26) (TP103) (CD antigen CD26) [Cleaved into: Dipeptidyl peptidase 4 membrane form (Dipeptidyl peptidase IV membrane form); Dipeptidyl peptidase 4 soluble form (Dipeptidyl peptidase IV soluble form)]	DPP4 ADCP2 CD26							None	None	None	0	1	0				8638000									1	130.068	4.3604e-08	130.07	124.58	130.07													1	130.068	4.3604e-08	130.07
1019	P27487	Dipeptidyl peptidase 4 (EC 3.4.14.5) (ADABP) (Adenosine deaminase complexing protein 2) (ADCP-2) (Dipeptidyl peptidase IV) (DPP IV) (T-cell activation antigen CD26) (TP103) (CD antigen CD26) [Cleaved into: Dipeptidyl peptidase 4 membrane form (Dipeptidyl peptidase IV membrane form); Dipeptidyl peptidase 4 soluble form (Dipeptidyl peptidase IV soluble form)]	DPP4 ADCP2 CD26							KBD Unique	None	KBD Unique	0	2	0				16839000	10539000						13689000		1	85.3773	6.66522e-22	168.85	132.42	85.377													1	168.846	0.000398027	168.85
1020	P33908	Mannosyl-oligosaccharide 1,2-alpha-mannosidase IA (EC 3.2.1.113) (Man(9)-alpha-mannosidase) (Man9-mannosidase) (Mannosidase alpha class 1A member 1) (Processing alpha-1,2-mannosidase IA) (Alpha-1,2-mannosidase IA)	MAN1A1							None	None	None	1	1	0		15941000			6349000								1	75.2127	0.0171295	75.213	56.43	75.213					1	60.6819	0.0279277	60.682
1021	Q7Z5Y6	Bone morphogenetic protein 8A (BMP-8A)	BMP8A							None	None	KBD Unique	1	2	0	3677800			6003800		13144000					9573900		1	78.1489	0.00657257	112.17	68.925	78.149	1	69.4234	0.0403476	69.423	1	96.2529	0.0340631	96.253					1	98.2993	0.0166014	98.299
1022	P43652	Afamin (Alpha-albumin) (Alpha-Alb)	AFM ALB2 ALBA							None	None	None	0	1	0				49028000									0.997657	26.2923	0.019555	84.522	20.957	84.522					0.997657	26.2923	0.019555	84.522					0.853314	7.6472	0.0393242	68.557
1023	P43652	Afamin (Alpha-albumin) (Alpha-Alb)	AFM ALB2 ALBA							None	None	None	0	1	0				12045000									1	109.664	0.00375236	109.66	97.617	109.66													1	109.664	0.00375236	109.66
1024	P43652	Afamin (Alpha-albumin) (Alpha-Alb)	AFM ALB2 ALBA							None	None	None	0	1	1				19543000				154760000					1	277.102	1.57517e-257	277.1	226.04	277.1									1	73.4663	0.027266	73.466	1	214.26	1.79477e-18	214.26
1025	P47972	Neuronal pentraxin-2 (NP2) (Neuronal pentraxin II) (NP-II)	NPTX2							None	None	None	0	1	0				3561500									1	89.4035	0.00228192	89.403	62.731	89.403													1	89.4035	0.00228192	89.403
1026	P51888	Prolargin (Proline-arginine-rich end leucine-rich repeat protein)	PRELP SLRR2A							None	None	None	1	0	0		9041500											1	58.831	4.80843e-27	126.63	109.55	58.831					1	62.3783	1.22618e-06	109.41	0.52081	0	4.80843e-27	126.63
1027	P51888	Prolargin (Proline-arginine-rich end leucine-rich repeat protein)	PRELP SLRR2A							None	None	None	1	1	2		10643000000		2286400000			336980000		308490000			322735000	1	58.831	2.88895e-140	210.67	193.98	58.831					1	62.3783	1.22618e-06	109.41	0.866144	8.10954	5.12941e-53	155.2	0.970474	15.1678	7.23763e-18	115.01
1028	P51888	Prolargin (Proline-arginine-rich end leucine-rich repeat protein)	PRELP SLRR2A	0.20888	0.358073	0.751632	0.680138	0.277902	0.0611434	None	None	None	3	2	3	4258500000	17747000000	3287200000	3475900000	46194000		5136100000	7551100000	6323600000	8430900000	1761047000	6.33693e+09	1	58.831	0	332.39	315.31	58.831	1	163.488	5.01211e-130	257.35	1	62.3783	2.40024e-164	276.34	1	171.234	1.07114e-183	281.68	1	189.316	1.5024e-146	268.13
1029	P51888	Prolargin (Proline-arginine-rich end leucine-rich repeat protein)	PRELP SLRR2A	0.0229666	0.000563329	0.892134	0.756901	0.0257434	0.0488202	Down	None	Down	3	3	3	119720000000	125870000000	90429000000	1545600000	2557800000	3613800000	84343000000	49031000000	166400000000	1.12006e+11	2572400000	9.99247e+10	1	143.604	2.06325e-85	220.17	209.84	148.87	1	143.604	4.68674e-53	178.42	1	120.083	6.0586e-71	209.4	1	110.041	5.52288e-58	188.69	1	91.74	5.45316e-58	188.8
1030	P51888	Prolargin (Proline-arginine-rich end leucine-rich repeat protein)	PRELP SLRR2A							CK Unique	CK Unique	None	2	0	0	363790000		20852000							192321000			1	118.053	1.24639e-45	148.87	135.78	148.87	1	118.053	1.24639e-45	148.87	0.99999	50.1917	6.89362e-05	70.647	0.999908	40.3615	0.00252419	52.707
1031	P51888	Prolargin (Proline-arginine-rich end leucine-rich repeat protein)	PRELP SLRR2A							None	None	None	0	0	1									8791500000				0.576007	1.97314	0.00466768	99.752	71.98	99.752
1032	P51888	Prolargin (Proline-arginine-rich end leucine-rich repeat protein)	PRELP SLRR2A	0.493345	0.106393	10.3818	0.00148866	0.0475201	0.00109267	None	Up	Down	3	3	2	639310000	1102100000	549360000	474450000	233160000	422530000	8725100000	7129800000		763590000	3.76713e+08	7927450000	0.999262	31.355	0	321.03	232.54	226.51	0.838768	10.1722	2.60878e-109	273.24	0.99887	32.475	1.96167e-31	222.81	0.905194	9.82738	3.87181e-226	299.42	0.994174	22.6816	5.06426e-23	209.19
1033	P51888	Prolargin (Proline-arginine-rich end leucine-rich repeat protein)	PRELP SLRR2A							None	None	None	1	1	1	129710000			22342000					39437000				1	71.1461	1.19484e-06	111.33	102.38	111.33	1	71.1461	1.19484e-06	111.33									0.518631	1.1098	0.026183	48.314
1034	P51888	Prolargin (Proline-arginine-rich end leucine-rich repeat protein)	PRELP SLRR2A	1.081	0.887755	1.6385	0.405381	0.659752	0.535961	None	None	None	3	3	2	370060000	224090000	129340000	76053000	454790000	251250000	218940000	571350000		2.41163e+08	2.60698e+08	395145000	1	83.6641	0	418.74	398.53	418.74	0.999999	61.3536	7.76906e-21	173.28	0.999999	62.2064	1.04595e-20	171.09	0.999997	55.1274	1.19492e-20	167.05	1	70.6148	1.55644e-25	193.64
1035	Q9UIU0	Dihydropyridine receptor alpha 2 subunit	CACNA2D1							KBD Unique	None	None	0	3	1				22630000	22528000	27410000			50977000		2.41893e+07		0.878111	8.57587	0.0154457	100.02	45.812	65.305													0.820107	6.58856	0.0154457	100.02
1036	Q9UIU0	Dihydropyridine receptor alpha 2 subunit	CACNA2D1							None	None	None	0	1	0				9813800									1	145.708	2.06401e-11	145.71	121.72	145.71													1	145.708	2.06401e-11	145.71
1037	Q9UIU0	Dihydropyridine receptor alpha 2 subunit	CACNA2D1							None	None	None	1	1	0			3200600	21496000									1	164.335	1.44002e-08	164.33	159.39	164.33									1	68.0687	0.0348992	68.069	1	164.335	1.44002e-08	164.33
1038	Q9UIU0	Dihydropyridine receptor alpha 2 subunit	CACNA2D1							None	None	None	0	1	0				37697000									1	93.2861	5.12736e-12	144.57	122.53	144.57													1	93.2861	5.12736e-12	144.57
1039	Q8N6T2	GDF10 protein								None	None	None	0	0	0													0.88913	9.0415	0.0108326	91.867	42.449	88.948					0.88913	9.0415	0.0131499	88.948	0.860976	7.919	0.0108326	91.867
1040	Q8N6T2	GDF10 protein				3.08868	0.0594128			None	None	None	3	1	2	44822000	94114000	69124000	13205000			275000000		153420000	6.93533e+07		214210000	1	107.4	1.71036e-06	135.56	121.79	107.4	1	113.459	0.00156601	113.46	1	135.558	1.71036e-06	135.56	1	87.363	0.00672355	87.363	1	90.6853	0.00606982	90.685
1041	P80108	Phosphatidylinositol-glycan-specific phospholipase D (PI-G PLD) (EC 3.1.4.50) (Glycoprotein phospholipase D) (Glycosyl-phosphatidylinositol-specific phospholipase D) (GPI-PLD) (GPI-specific phospholipase D)	GPLD1 PIGPLD1							CK Unique	CK Unique	None	2	0	0		19578000	18406000							18992000			1	64.3531	0.0217775	132.09	108.3	132.09					1	64.3531	0.0217775	132.09	0.99985	38.2501	0.0339738	102.77
1042	P82987	ADAMTS-like protein 3 (ADAMTSL-3) (Punctin-2)	ADAMTSL3 KIAA1233							None	None	OA Unique	1	0	2	6999800							67042000	93060000			80051000	1	197.209	8.06864e-81	204.5	141.95	197.21	1	123.792	0.000112501	123.79	1	157.378	2.37661e-21	157.38
1043	P82987	ADAMTS-like protein 3 (ADAMTSL-3) (Punctin-2)	ADAMTSL3 KIAA1233			4.56863	0.00233602			None	Up	None	3	1	3	68415000	137630000	77815000	20009000			383410000	393310000	520130000	94620000		4.32283e+08	1	81.9504	0.00546939	98.044	80.608	81.95	1	72.2748	0.0308745	72.275	1	98.044	0.00546939	98.044	1	79.9739	0.0134784	79.974	1	78.0978	0.0153857	78.098
1044	P82987	ADAMTS-like protein 3 (ADAMTSL-3) (Punctin-2)	ADAMTSL3 KIAA1233							None	None	None	0	0	0													0.999538	33.3499	0.00754866	65.225	60.335	65.225
1045	P82987	ADAMTS-like protein 3 (ADAMTSL-3) (Punctin-2)	ADAMTSL3 KIAA1233							None	CK Unique	None	3	1	0	21322000	42786000	15530000	4388600						26546000			1	114.281	0.00324695	157.33	60.258	114.28	1	128.607	0.0043431	128.61	1	157.329	0.00521343	157.33	1	141.389	0.00324695	141.39	1	114.281	0.00910335	114.28
1046	P98161	Polycystin-1 (PC1) (Autosomal dominant polycystic kidney disease 1 protein)	PKD1							None	None	None	0	0	0													1	61.4093	0.0124302	61.409	54.829	61.409	1	61.4093	0.0124302	61.409
1047	Q02388	Collagen alpha-1(VII) chain (Long-chain collagen) (LC collagen)	COL7A1							KBD Unique	None	KBD Unique	0	2	0				12114000		8497900					10305950		1	84.17	0.00568481	96.342	42.591	84.17													1	96.3419	0.00568481	96.342
1048	Q02413	Desmoglein-1 (Cadherin family member 4) (Desmosomal glycoprotein 1) (DG1) (DGI) (Pemphigus foliaceus antigen)	DSG1 CDHF4			26.6803	0.204685			CK Unique	None	OA Unique	2	0	2	6458800		5888900				250170000		79270000	6173850		164720000	1	191.527	1.19089e-08	191.53	166.39	191.53	1	75.7881	0.0215293	75.788					1	108.348	0.0036615	108.35
1049	Q03591	Complement factor H-related protein 1 (FHR-1) (H factor-like protein 1) (H-factor-like 1) (H36)	CFHR1 CFHL CFHL1 CFHL1P CFHR1P FHR1 HFL1 HFL2	3.30559	0.404234	30.9449	0.00440116	0.106822	0.0083205	None	Up	Down	3	3	3	15699000	147070000	113370000	750710000	42182000	119910000	2904100000	3639700000	2001300000	9.20463e+07	3.04267e+08	2.84837e+09	0.999368	31.9911	2.39761e-93	269.33	241.64	259.35	0.867589	8.16389	1.92346e-09	180.97	0.892108	9.17458	1.00447e-08	158.41	0.895353	9.32268	1.98399e-12	194.5	0.993138	21.6058	7.96865e-93	265.61
1050	Q05707	Collagen alpha-1(XIV) chain (Undulin)	COL14A1 UND			130.448	0.340586			None	None	None	2	1	3		20500000	4596200	604830000			704010000	3854100000	352530000	12548100		1636880000	1	185.667	1.08203e-109	266.35	225.24	185.67					1	125.975	2.52034e-18	140.08	1	110.985	0.000359972	110.98	1	167.55	1.08203e-109	266.35
1051	Q05707	Collagen alpha-1(XIV) chain (Undulin)	COL14A1 UND			130.448	0.340586			None	None	None	2	1	3		20500000	4596200	543630000			704010000	3854100000	352530000	12548100		1636880000	1	185.667	4.4809e-80	250.05	226.2	185.67					1	125.975	2.52034e-18	140.08	1	110.985	0.000359972	110.98	1	167.55	1.27322e-79	245.4
1052	Q05707	Collagen alpha-1(XIV) chain (Undulin)	COL14A1 UND							None	None	None	0	1	1					100740000			572140000					1	89.4035	0.00641878	89.403	28.814	89.403
1053	Q05707	Collagen alpha-1(XIV) chain (Undulin)	COL14A1 UND	22.4134	0.212013	112.878	0.275528	0.198563	0.242274	None	None	None	2	3	3		25683000	49012000	1581600000	253390000	676260000	1945100000	9078300000	1623700000	37347500	8.37083e+08	4215700000	1	160.653	3.40759e-179	306.21	268.51	256.13					0.999876	39.051	0.006499	76.588	0.99991	40.4368	0.00581113	70.98	1	160.653	4.44258e-136	284.91
1054	Q05DB4	HEBP2 protein (Fragment)	HEBP2							None	None	None	1	0	0		10047000000											0.874919	7.77778	0.0247375	81.95	26.867	81.95					0.874919	7.77778	0.0247375	81.95
1055	Q05DB4	HEBP2 protein (Fragment)	HEBP2							None	None	None	1	0	0		10047000000											0.874919	7.77778	0.0247375	81.95	26.867	81.95					0.874919	7.77778	0.0247375	81.95
1056	Q07954	Prolow-density lipoprotein receptor-related protein 1 (LRP-1) (Alpha-2-macroglobulin receptor) (A2MR) (Apolipoprotein E receptor) (APOER) (CD antigen CD91) [Cleaved into: Low-density lipoprotein receptor-related protein 1 85 kDa subunit (LRP-85); Low-density lipoprotein receptor-related protein 1 515 kDa subunit (LRP-515); Low-density lipoprotein receptor-related protein 1 intracellular domain (L…	LRP1 A2MR APR	2.1688	0.537195	6.72184	0.177168	0.322649	0.182269	None	None	None	2	3	3		46568000	22261000	162710000	22314000	38890000	207830000	391560000	94596000	34414500	74638000	2.31329e+08	1	117.913	1.83418e-65	177.73	160.58	169.13	1	102.172	4.44859e-44	139.81	1	117.913	3.49634e-58	169.13	0.999918	40.8856	2.28184e-05	60.541	1	88.9359	1.32432e-13	119.75
1057	Q07954	Prolow-density lipoprotein receptor-related protein 1 (LRP-1) (Alpha-2-macroglobulin receptor) (A2MR) (Apolipoprotein E receptor) (APOER) (CD antigen CD91) [Cleaved into: Low-density lipoprotein receptor-related protein 1 85 kDa subunit (LRP-85); Low-density lipoprotein receptor-related protein 1 515 kDa subunit (LRP-515); Low-density lipoprotein receptor-related protein 1 intracellular domain (L…	LRP1 A2MR APR							None	None	None	0	1	0				20494000									1	173.592	0.00406117	173.59	169.24	173.59													1	173.592	0.00406117	173.59
1058	Q07954	Prolow-density lipoprotein receptor-related protein 1 (LRP-1) (Alpha-2-macroglobulin receptor) (A2MR) (Apolipoprotein E receptor) (APOER) (CD antigen CD91) [Cleaved into: Low-density lipoprotein receptor-related protein 1 85 kDa subunit (LRP-85); Low-density lipoprotein receptor-related protein 1 515 kDa subunit (LRP-515); Low-density lipoprotein receptor-related protein 1 intracellular domain (L…	LRP1 A2MR APR							None	None	None	0	1	0				78029000									1	109.236	4.93293e-298	350.95	336.83	109.24													1	350.95	4.93293e-298	350.95
1059	Q07954	Prolow-density lipoprotein receptor-related protein 1 (LRP-1) (Alpha-2-macroglobulin receptor) (A2MR) (Apolipoprotein E receptor) (APOER) (CD antigen CD91) [Cleaved into: Low-density lipoprotein receptor-related protein 1 85 kDa subunit (LRP-85); Low-density lipoprotein receptor-related protein 1 515 kDa subunit (LRP-515); Low-density lipoprotein receptor-related protein 1 intracellular domain (L…	LRP1 A2MR APR							None	None	None	1	1	3		10774000		62657000			143950000	329100000	153300000			2.08783e+08	1	70.1001	5.78819e-11	206.23	186.09	70.1					1	68.8461	0.0388201	68.846					1	166.614	0.00172333	166.61
1060	Q07954	Prolow-density lipoprotein receptor-related protein 1 (LRP-1) (Alpha-2-macroglobulin receptor) (A2MR) (Apolipoprotein E receptor) (APOER) (CD antigen CD91) [Cleaved into: Low-density lipoprotein receptor-related protein 1 85 kDa subunit (LRP-85); Low-density lipoprotein receptor-related protein 1 515 kDa subunit (LRP-515); Low-density lipoprotein receptor-related protein 1 intracellular domain (L…	LRP1 A2MR APR					0.205734	0.0276036	None	None	Down	1	2	2			2986900	32288000		7142300		92877000	98780000		19715150	95828500	1	114.868	1.421e-136	259.23	227.81	114.87					1	90.7309	0.00596538	90.731	1	93.3452	0.0267225	93.345	1	259.23	1.19864e-77	259.23
1061	Q07954	Prolow-density lipoprotein receptor-related protein 1 (LRP-1) (Alpha-2-macroglobulin receptor) (A2MR) (Apolipoprotein E receptor) (APOER) (CD antigen CD91) [Cleaved into: Low-density lipoprotein receptor-related protein 1 85 kDa subunit (LRP-85); Low-density lipoprotein receptor-related protein 1 515 kDa subunit (LRP-515); Low-density lipoprotein receptor-related protein 1 intracellular domain (L…	LRP1 A2MR APR	2.6374	0.148366	34.4513	0.0253222	0.0765546	0.0299753	None	Up	Down	3	3	3	18007000	6769500	19023000	63479000	21272000	30766000	392390000	781490000	335070000	1.45998e+07	3.85057e+07	5.02983e+08	1	133.235	1.64433e-27	164.96	120.56	133.23	1	95.5016	0.0182728	95.502	1	160.879	1.64433e-27	160.88	1	133.235	0.00184428	133.23	1	164.955	0.0038694	164.96
1062	Q07954	Prolow-density lipoprotein receptor-related protein 1 (LRP-1) (Alpha-2-macroglobulin receptor) (A2MR) (Apolipoprotein E receptor) (APOER) (CD antigen CD91) [Cleaved into: Low-density lipoprotein receptor-related protein 1 85 kDa subunit (LRP-85); Low-density lipoprotein receptor-related protein 1 515 kDa subunit (LRP-515); Low-density lipoprotein receptor-related protein 1 intracellular domain (L…	LRP1 A2MR APR	3.28901	0.0734947	9.04013	0.134551	0.363823	0.111109	None	None	None	2	3	2	55029000	26711000		171120000	146780000	85365000	235710000	503230000		40870000	1.34422e+08	369470000	1	125.584	0.00334076	164.53	116.03	125.58	1	109.862	0.0127664	109.86	1	139.138	0.00334076	139.14					1	164.533	0.00550967	164.53
1063	Q07954	Prolow-density lipoprotein receptor-related protein 1 (LRP-1) (Alpha-2-macroglobulin receptor) (A2MR) (Apolipoprotein E receptor) (APOER) (CD antigen CD91) [Cleaved into: Low-density lipoprotein receptor-related protein 1 85 kDa subunit (LRP-85); Low-density lipoprotein receptor-related protein 1 515 kDa subunit (LRP-515); Low-density lipoprotein receptor-related protein 1 intracellular domain (L…	LRP1 A2MR APR							None	None	KBD Unique	1	3	0		10142000		33840000	30965000	21053000					2.86193e+07		1	142.208	1.09383e-115	245.09	237.89	142.21					1	133.616	1.12921e-21	133.62					1	245.086	1.09383e-115	245.09
1064	Q07954	Prolow-density lipoprotein receptor-related protein 1 (LRP-1) (Alpha-2-macroglobulin receptor) (A2MR) (Apolipoprotein E receptor) (APOER) (CD antigen CD91) [Cleaved into: Low-density lipoprotein receptor-related protein 1 85 kDa subunit (LRP-85); Low-density lipoprotein receptor-related protein 1 515 kDa subunit (LRP-515); Low-density lipoprotein receptor-related protein 1 intracellular domain (L…	LRP1 A2MR APR	4.06677	0.158649	31.9917	0.00991684	0.12712	0.0158431	None	Up	Down	3	3	3	15701000	20866000	15579000	131680000	47170000	33216000	718950000	619450000	329840000	17382000	7.06887e+07	556080000	0.999876	39.063	2.63966e-203	320.02	308.87	320.02	0.843236	7.30702	6.55287e-06	177.78	0.991	20.4182	2.58522e-26	220.1	0.978285	16.5371	9.31006e-19	211.84	0.987023	18.8115	2.83718e-86	265.67
1065	Q07954	Prolow-density lipoprotein receptor-related protein 1 (LRP-1) (Alpha-2-macroglobulin receptor) (A2MR) (Apolipoprotein E receptor) (APOER) (CD antigen CD91) [Cleaved into: Low-density lipoprotein receptor-related protein 1 85 kDa subunit (LRP-85); Low-density lipoprotein receptor-related protein 1 515 kDa subunit (LRP-515); Low-density lipoprotein receptor-related protein 1 intracellular domain (L…	LRP1 A2MR APR	2.3186	0.176772	15.898	0.0170497	0.145842	0.0242784	None	Up	Down	3	3	3	80774000	166770000	67741000	401010000	168490000	161520000	1214700000	2461300000	1336400000	105095000	2.43673e+08	1670800000	1	145.457	5.06346e-08	189.57	121.35	145.46	1	147.623	2.71681e-05	147.62	1	170.889	6.09303e-05	170.89	1	166.692	5.42398e-05	166.69	1	183.03	7.48095e-06	183.03
1066	Q07954	Prolow-density lipoprotein receptor-related protein 1 (LRP-1) (Alpha-2-macroglobulin receptor) (A2MR) (Apolipoprotein E receptor) (APOER) (CD antigen CD91) [Cleaved into: Low-density lipoprotein receptor-related protein 1 85 kDa subunit (LRP-85); Low-density lipoprotein receptor-related protein 1 515 kDa subunit (LRP-515); Low-density lipoprotein receptor-related protein 1 intracellular domain (L…	LRP1 A2MR APR							None	None	None	2	1	1	10941000	15430000		75193000				562410000		13185500			1	106.379	9.15437e-41	208.33	142.06	106.38	1	68.4405	0.00317162	108.9	1	74.4602	0.00898021	83.775					1	199.076	3.35851e-12	199.08
1067	Q07954	Prolow-density lipoprotein receptor-related protein 1 (LRP-1) (Alpha-2-macroglobulin receptor) (A2MR) (Apolipoprotein E receptor) (APOER) (CD antigen CD91) [Cleaved into: Low-density lipoprotein receptor-related protein 1 85 kDa subunit (LRP-85); Low-density lipoprotein receptor-related protein 1 515 kDa subunit (LRP-515); Low-density lipoprotein receptor-related protein 1 intracellular domain (L…	LRP1 A2MR APR	2.48555	0.420166	44.3485	0.00110229	0.0560459	0.00151337	None	Up	Down	3	3	3	45685000	56357000	37408000	267020000	18429000	61161000	1707500000	2519200000	1957700000	4.64833e+07	1.15537e+08	2.06147e+09	1	192.918	5.94896e-18	207.83	121.82	192.92	1	142.427	3.69299e-05	142.43	1	150.608	2.14573e-05	150.61	1	142.427	3.69299e-05	142.43	1	185.599	3.91035e-06	185.6
1068	Q07954	Prolow-density lipoprotein receptor-related protein 1 (LRP-1) (Alpha-2-macroglobulin receptor) (A2MR) (Apolipoprotein E receptor) (APOER) (CD antigen CD91) [Cleaved into: Low-density lipoprotein receptor-related protein 1 85 kDa subunit (LRP-85); Low-density lipoprotein receptor-related protein 1 515 kDa subunit (LRP-515); Low-density lipoprotein receptor-related protein 1 intracellular domain (L…	LRP1 A2MR APR							None	None	None	0	0	0													0.538133	0.663724	2.2968e-13	108.4	101.46	108.4
1069	Q07954	Prolow-density lipoprotein receptor-related protein 1 (LRP-1) (Alpha-2-macroglobulin receptor) (A2MR) (Apolipoprotein E receptor) (APOER) (CD antigen CD91) [Cleaved into: Low-density lipoprotein receptor-related protein 1 85 kDa subunit (LRP-85); Low-density lipoprotein receptor-related protein 1 515 kDa subunit (LRP-515); Low-density lipoprotein receptor-related protein 1 intracellular domain (L…	LRP1 A2MR APR							None	None	None	0	1	0				17326000									1	105.362	2.2968e-13	108.4	101.46	108.4													1	76.1637	0.00124675	83.039
1070	Q07954	Prolow-density lipoprotein receptor-related protein 1 (LRP-1) (Alpha-2-macroglobulin receptor) (A2MR) (Apolipoprotein E receptor) (APOER) (CD antigen CD91) [Cleaved into: Low-density lipoprotein receptor-related protein 1 85 kDa subunit (LRP-85); Low-density lipoprotein receptor-related protein 1 515 kDa subunit (LRP-515); Low-density lipoprotein receptor-related protein 1 intracellular domain (L…	LRP1 A2MR APR	3.39123	0.225186	38.1469	0.0398021	0.0888991	0.0492946	None	Up	Down	3	3	2	13285000	22543000	13164000	103960000	10369000	51814000		856190000	389740000	1.63307e+07	55381000	622965000	1	66.0227	2.27418e-12	194.06	154.05	66.023	1	116.238	0.000953277	116.24	1	140.006	6.23221e-07	140.01	1	112.498	0.00188061	112.5	1	194.056	2.27418e-12	194.06
1071	Q07954	Prolow-density lipoprotein receptor-related protein 1 (LRP-1) (Alpha-2-macroglobulin receptor) (A2MR) (Apolipoprotein E receptor) (APOER) (CD antigen CD91) [Cleaved into: Low-density lipoprotein receptor-related protein 1 85 kDa subunit (LRP-85); Low-density lipoprotein receptor-related protein 1 515 kDa subunit (LRP-515); Low-density lipoprotein receptor-related protein 1 intracellular domain (L…	LRP1 A2MR APR	3.86287	0.222019	21.3521	0.0139771	0.180913	0.0291539	None	Up	Down	3	3	3	35277000	51139000	25704000	289290000	48770000	95045000	592130000	1161000000	640870000	3.73733e+07	1.44368e+08	798000000	1	131.654	9.77285e-19	211.64	143.27	211.64	1	120.009	7.16781e-06	153.97	1	119.639	7.7414e-06	155.15	1	114.472	9.50993e-06	158.79	1	130.601	1.02187e-08	192.38
1072	Q07954	Prolow-density lipoprotein receptor-related protein 1 (LRP-1) (Alpha-2-macroglobulin receptor) (A2MR) (Apolipoprotein E receptor) (APOER) (CD antigen CD91) [Cleaved into: Low-density lipoprotein receptor-related protein 1 85 kDa subunit (LRP-85); Low-density lipoprotein receptor-related protein 1 515 kDa subunit (LRP-515); Low-density lipoprotein receptor-related protein 1 intracellular domain (L…	LRP1 A2MR APR					0.044258	0.0225836	KBD Unique	OA Unique	Down	0	3	3				116790000	24276000	30076000	984610000	1967900000	914410000		5.70473e+07	1.28897e+09	1	307.954	1.68779e-284	343.87	330.44	307.95													1	217.088	1.68779e-284	343.87
1073	Q07954	Prolow-density lipoprotein receptor-related protein 1 (LRP-1) (Alpha-2-macroglobulin receptor) (A2MR) (Apolipoprotein E receptor) (APOER) (CD antigen CD91) [Cleaved into: Low-density lipoprotein receptor-related protein 1 85 kDa subunit (LRP-85); Low-density lipoprotein receptor-related protein 1 515 kDa subunit (LRP-515); Low-density lipoprotein receptor-related protein 1 intracellular domain (L…	LRP1 A2MR APR	4.9204	0.383997	58.5444	0.0545635	0.0840457	0.0223987	None	None	Down	2	3	3		11155000	6922800	98364000	15954000	19107000	397260000	791640000	398630000	9038900	44475000	5.29177e+08	1	93.7771	1.2395e-93	270.1	242.77	270.1					0.987965	19.1429	0.0034443	85.536	0.998086	27.1714	0.000293999	123.51	0.999997	55.8918	1.14974e-64	248.21
1074	Q07954	Prolow-density lipoprotein receptor-related protein 1 (LRP-1) (Alpha-2-macroglobulin receptor) (A2MR) (Apolipoprotein E receptor) (APOER) (CD antigen CD91) [Cleaved into: Low-density lipoprotein receptor-related protein 1 85 kDa subunit (LRP-85); Low-density lipoprotein receptor-related protein 1 515 kDa subunit (LRP-515); Low-density lipoprotein receptor-related protein 1 intracellular domain (L…	LRP1 A2MR APR							None	None	None	0	0	0													0.999997	55.2596	1.61534e-48	166.38	124.98	166.38
1075	Q07954	Prolow-density lipoprotein receptor-related protein 1 (LRP-1) (Alpha-2-macroglobulin receptor) (A2MR) (Apolipoprotein E receptor) (APOER) (CD antigen CD91) [Cleaved into: Low-density lipoprotein receptor-related protein 1 85 kDa subunit (LRP-85); Low-density lipoprotein receptor-related protein 1 515 kDa subunit (LRP-515); Low-density lipoprotein receptor-related protein 1 intracellular domain (L…	LRP1 A2MR APR							None	None	None	0	0	0													0.997765	26.4971	1.61534e-48	166.38	124.98	166.38
1076	Q07954	Prolow-density lipoprotein receptor-related protein 1 (LRP-1) (Alpha-2-macroglobulin receptor) (A2MR) (Apolipoprotein E receptor) (APOER) (CD antigen CD91) [Cleaved into: Low-density lipoprotein receptor-related protein 1 85 kDa subunit (LRP-85); Low-density lipoprotein receptor-related protein 1 515 kDa subunit (LRP-515); Low-density lipoprotein receptor-related protein 1 intracellular domain (L…	LRP1 A2MR APR	3.1809	0.0688542	23.2687	0.00369702	0.136703	0.00581435	None	Up	Down	3	3	3	46300000	56766000	16106000	190650000	82334000	106090000	742400000	1210800000	819780000	39724000	126358000	9.24327e+08	1	84.4175	1.98723e-78	257.19	238.83	231.74	0.999752	36.0592	5.66682e-05	128.35	0.999954	43.4054	9.9322e-10	179.67	0.996838	24.9872	0.000677006	113.54	1	75.3223	1.84623e-66	252.42
1077	Q07954	Prolow-density lipoprotein receptor-related protein 1 (LRP-1) (Alpha-2-macroglobulin receptor) (A2MR) (Apolipoprotein E receptor) (APOER) (CD antigen CD91) [Cleaved into: Low-density lipoprotein receptor-related protein 1 85 kDa subunit (LRP-85); Low-density lipoprotein receptor-related protein 1 515 kDa subunit (LRP-515); Low-density lipoprotein receptor-related protein 1 intracellular domain (L…	LRP1 A2MR APR							None	None	None	0	0	0													0.984215	17.9484	0.00247658	96.64	62.774	96.64													0.984215	17.9484	0.00247658	96.64
1078	Q07954	Prolow-density lipoprotein receptor-related protein 1 (LRP-1) (Alpha-2-macroglobulin receptor) (A2MR) (Apolipoprotein E receptor) (APOER) (CD antigen CD91) [Cleaved into: Low-density lipoprotein receptor-related protein 1 85 kDa subunit (LRP-85); Low-density lipoprotein receptor-related protein 1 515 kDa subunit (LRP-515); Low-density lipoprotein receptor-related protein 1 intracellular domain (L…	LRP1 A2MR APR	3.02353	0.455287	15.0066	0.341541	0.20148	0.264879	None	None	None	2	3	2		18772000	14344000	110030000	27882000	12279000	435910000	61049000		16558000	5.00637e+07	248479500	1	238.918	1.55028e-158	238.92	226.34	238.92					1	160.675	1.1178e-08	160.67	1	183.987	1.14149e-09	183.99	1	129.819	9.16138e-05	129.82
1079	Q07954	Prolow-density lipoprotein receptor-related protein 1 (LRP-1) (Alpha-2-macroglobulin receptor) (A2MR) (Apolipoprotein E receptor) (APOER) (CD antigen CD91) [Cleaved into: Low-density lipoprotein receptor-related protein 1 85 kDa subunit (LRP-85); Low-density lipoprotein receptor-related protein 1 515 kDa subunit (LRP-515); Low-density lipoprotein receptor-related protein 1 intracellular domain (L…	LRP1 A2MR APR	3.62781	0.303533					None	None	None	2	2	1		14267000	10825000	69472000		21557000	306580000			12546000	45514500		1	232.394	3.24031e-138	278.37	249.41	232.39					1	135.987	5.88648e-07	135.99	1	109.236	0.00199738	109.24	1	240.845	1.12038e-52	240.85
1080	Q07954	Prolow-density lipoprotein receptor-related protein 1 (LRP-1) (Alpha-2-macroglobulin receptor) (A2MR) (Apolipoprotein E receptor) (APOER) (CD antigen CD91) [Cleaved into: Low-density lipoprotein receptor-related protein 1 85 kDa subunit (LRP-85); Low-density lipoprotein receptor-related protein 1 515 kDa subunit (LRP-515); Low-density lipoprotein receptor-related protein 1 intracellular domain (L…	LRP1 A2MR APR							KBD Unique	None	None	0	2	1				3958800	7966400			24480000			5962600		1	124.922	0.00338561	138.06	71.069	124.92													1	120.155	0.00338561	138.06
1081	Q07954	Prolow-density lipoprotein receptor-related protein 1 (LRP-1) (Alpha-2-macroglobulin receptor) (A2MR) (Apolipoprotein E receptor) (APOER) (CD antigen CD91) [Cleaved into: Low-density lipoprotein receptor-related protein 1 85 kDa subunit (LRP-85); Low-density lipoprotein receptor-related protein 1 515 kDa subunit (LRP-515); Low-density lipoprotein receptor-related protein 1 intracellular domain (L…	LRP1 A2MR APR	1.0737	0.872876	20.8966	0.0375751	0.0513819	0.0380432	None	Up	Down	3	3	2	56976000	141730000	82716000	164230000	73297000	64637000	1260000000	2660500000		9.38073e+07	1.00721e+08	1960250000	1	220.173	1.94657e-61	220.17	174.2	220.17	1	133.05	1.50056e-05	133.05	1	125.97	2.73249e-05	125.97	1	156.013	1.15084e-05	156.01	1	218.107	1.94657e-61	218.11
1082	Q0PNF2	FEX1								None	None	None	0	1	0				5447500									0.99999	50.1094	0.000775117	102.64	90.254	102.64													0.99999	50.1094	0.000775117	102.64
1083	Q0PNF2	FEX1								None	None	None	0	1	1				47093000				338840000					1	142.005	2.26227e-11	142.01	103.49	142.01													1	122.306	5.54438e-07	122.31
1084	Q0PNF2	FEX1								None	None	None	0	1	0				19341000									1	75.3872	1.69094e-05	166.69	138.95	75.387													1	166.692	1.69094e-05	166.69
1085	Q12797	Aspartyl/asparaginyl beta-hydroxylase (EC 1.14.11.16) (Aspartate beta-hydroxylase) (ASP beta-hydroxylase) (Peptide-aspartate beta-dioxygenase)	ASPH BAH			33.4921	0.0268275			None	Up	None	3	1	3	19732000	19196000	18241000	164280000			558170000	984270000	372270000	1.90563e+07		6.38237e+08	1	108.47	2.58647e-14	170.72	70.567	108.47	1	132.779	2.56543e-05	132.78	1	132.779	2.56543e-05	132.78	1	121.83	0.000500682	121.83	1	170.716	1.93066e-05	170.72
1086	Q59FV9	PTK7 protein tyrosine kinase 7 isoform a variant (Fragment)								None	OA Unique	None	0	1	2						9692300		15043000	34088000			24565500	1	54.1033	2.3769e-14	147.39	131.13	54.103
1087	Q59FV9	PTK7 protein tyrosine kinase 7 isoform a variant (Fragment)								None	None	None	0	0	0													1	69.5478	0.0012501	69.548	61.36	69.548													1	68.4198	0.00162699	68.42
1088	Q13433	Zinc transporter ZIP6 (Estrogen-regulated protein LIV-1) (Solute carrier family 39 member 6) (Zrt- and Irt-like protein 6) (ZIP-6)	SLC39A6 LIV1 ZIP6							None	None	None	0	0	1							6854100						1	125.817	0.000120206	125.82	88.259	125.82
1089	Q13433	Zinc transporter ZIP6 (Estrogen-regulated protein LIV-1) (Solute carrier family 39 member 6) (Zrt- and Irt-like protein 6) (ZIP-6)	SLC39A6 LIV1 ZIP6							None	None	None	0	1	0				12138000									0.997488	25.9889	7.19337e-09	152.7	114.4	152.7	0.867139	8.14691	0.0331509	71.555									0.997488	25.9889	7.19337e-09	152.7
1090	Q13641	Trophoblast glycoprotein (5T4 oncofetal antigen) (5T4 oncofetal trophoblast glycoprotein) (5T4 oncotrophoblast glycoprotein) (M6P1) (Wnt-activated inhibitory factor 1) (WAIF1)	TPBG 5T4							None	None	None	0	1	0				4865800									0.999999	62.3994	0.00372597	72.187	61.372	72.187													0.99997	45.1813	0.0282069	49.149
1091	Q13641	Trophoblast glycoprotein (5T4 oncofetal antigen) (5T4 oncofetal trophoblast glycoprotein) (5T4 oncotrophoblast glycoprotein) (M6P1) (Wnt-activated inhibitory factor 1) (WAIF1)	TPBG 5T4							None	OA Unique	OA Unique	0	0	3							111970000	130130000	128110000			1.23403e+08	1	89.3739	0.000125388	101.04	63.861	89.374
1092	Q13641	Trophoblast glycoprotein (5T4 oncofetal antigen) (5T4 oncofetal trophoblast glycoprotein) (5T4 oncotrophoblast glycoprotein) (M6P1) (Wnt-activated inhibitory factor 1) (WAIF1)	TPBG 5T4							None	OA Unique	OA Unique	0	0	2							26747000		23189000			24968000	1	79.5139	2.41514e-05	113.28	96.197	79.514
1093	Q75MQ2	Uncharacterized protein SEMA3A (Fragment)	SEMA3A							None	None	None	1	0	0	11646000												1	75.1019	9.93489e-21	176.05	152.45	75.102	1	176.051	9.93489e-21	176.05	1	67.1154	0.0120676	67.115	1	69.1076	0.00919945	69.108
1094	Q14766	Latent-transforming growth factor beta-binding protein 1 (LTBP-1) (Transforming growth factor beta-1-binding protein 1) (TGF-beta1-BP-1)	LTBP1							None	None	None	1	1	2			9012100	26007000			66411000	169880000				118145500	0.999854	38.3617	1.89787e-44	169.92	157.09	114.57									0.99969	35.084	0.0013156	92.886	0.999854	38.3617	1.89787e-44	169.92
1095	Q14766	Latent-transforming growth factor beta-binding protein 1 (LTBP-1) (Transforming growth factor beta-1-binding protein 1) (TGF-beta1-BP-1)	LTBP1							None	None	None	0	1	0				70138000									1	127.706	2.42299e-40	178.53	167.28	178.53	0.999958	43.8132	1.05325e-07	86.987	1	86.4379	1.88812e-09	90.754	1	121.798	2.28768e-20	125.52	1	127.706	2.42299e-40	178.53
1096	Q14766	Latent-transforming growth factor beta-binding protein 1 (LTBP-1) (Transforming growth factor beta-1-binding protein 1) (TGF-beta1-BP-1)	LTBP1							None	None	None	0	0	0													1	68.9238	2.28768e-20	125.52	104.27	125.52					0.99995	42.9802	1.88812e-09	90.754	1	68.9238	2.28768e-20	125.52	1	65.8709	2.13205e-11	101.53
1097	Q14766	Latent-transforming growth factor beta-binding protein 1 (LTBP-1) (Transforming growth factor beta-1-binding protein 1) (TGF-beta1-BP-1)	LTBP1			4.10361	0.000265862			CK Unique	Up	OA Unique	3	0	2	46166000	45681000	38180000					185600000	170120000	4.33423e+07		177860000	1	102.39	9.4332e-21	155.24	128.46	102.39	1	44.0288	0.000131963	104.84	1	48.3756	7.21957e-11	138.75	1	92.1328	0.00120902	92.133
1098	Q15198	Platelet-derived growth factor receptor-like protein (PDGFR-like protein) (PDGF receptor beta-like tumor suppressor)	PDGFRL PRLTS			13.1013	2.76888e-05			None	Up	None	3	1	3	29449000	80350000	60589000	100090000			692550000	749510000	790240000	56796000		744100000	1	98.9017	1.05227e-05	132.47	102.73	98.902	1	101.929	0.00323338	101.93	1	77.3868	0.00857231	77.387	1	107.055	0.00254255	107.06	1	75.8194	0.010706	75.819
1099	V9HW95	Epididymis secretory protein Li 84	HEL-S-84							None	None	None	1	1	2			16290000	57950000			336140000	1215100000				775620000	1	228.617	3.87029e-105	228.62	212.73	228.62									1	91.5828	1.43857e-07	91.583	1	63.901	2.69823e-71	192.67
1100	Q6IBJ4	SGCB protein	SGCB					0.108821	0.166008	None	None	None	1	2	2		7603600		39280000		23560000	168610000	408850000			31420000	288730000	1	88.3797	2.3427e-14	185.33	125.98	185.33					0.99997	45.26	0.00940675	84.882					1	66.3709	6.23031e-06	152.04
1101	Q16853	Membrane primary amine oxidase (EC 1.4.3.21) (Copper amine oxidase) (HPAO) (Semicarbazide-sensitive amine oxidase) (SSAO) (Vascular adhesion protein 1) (VAP-1)	AOC3 VAP1							None	None	None	0	1	1				5892500					80796000				1	64.2947	0.00407372	66.467	49.037	64.295													1	57.0089	0.013441	57.009
1102	Q16853	Membrane primary amine oxidase (EC 1.4.3.21) (Copper amine oxidase) (HPAO) (Semicarbazide-sensitive amine oxidase) (SSAO) (Vascular adhesion protein 1) (VAP-1)	AOC3 VAP1							None	OA Unique	None	0	1	3					26490000		273260000	428980000	897010000			5.33083e+08	0.999832	37.7458	3.59571e-05	140.16	81.488	121.61													0.999572	33.6811	0.000445237	120.99
1103	Q2TA85	C10orf54 protein (Fragment)	C10orf54							None	None	None	0	1	0				9561300									1	125.86	4.40065e-08	125.86	114.82	125.86													1	125.86	4.40065e-08	125.86
1104	Q3B7K3	IKIP protein (Fragment)	IKIP					0.156676	0.168423	KBD Unique	OA Unique	None	0	3	2				22333000	11773000	10511000		153990000	35858000		1.48723e+07	94924000	1	119.028	8.39865e-09	193.3	155	119.03													1	134.382	1.22784e-05	134.38
1105	Q3B7K3	IKIP protein (Fragment)	IKIP							None	None	None	0	1	0				16409000									0.996195	24.1799	0	318.7	254.06	318.7													0.991041	20.4383	9.40442e-94	255.34
1106	Q3SY74	Protocadherin gamma subfamily B, 1	PCDHGB1							None	None	None	0	1	0				9938100									1	85.6723	0.00373562	85.672	59.555	85.672													1	77.2786	0.00871967	77.279
1107	Q4AC94	C2 domain-containing protein 3	C2CD3							None	OA Unique	OA Unique	0	0	2							198210000	196470000				197340000	0.999581	34.7391	0.0123965	88.496	61.524	88.496
1108	Q53FR6	Cartilage oligomeric matrix protein variant (Fragment)								None	None	None	0	0	0													0.997028	25.2572	0.00293681	48.226	38.599	48.226
1109	Q58EX2	Protein sidekick-2	SDK2 KIAA1514							None	None	None	0	0	0													1	110.366	1.1986e-13	110.37	89.985	110.37
1110	Q58EX2	Protein sidekick-2	SDK2 KIAA1514							None	None	None	1	1	3		7499000		8386200			211700000	196540000	74509000			1.60916e+08	1	75.3782	0.000407533	126.41	109.17	75.378					1	66.6213	0.0427053	66.621					1	126.412	0.000407533	126.41
1111	Q58EX2	Protein sidekick-2	SDK2 KIAA1514							None	None	None	0	0	1								286850000					1	158.815	1.53585e-20	158.81	119.55	158.81
1112	Q58EX2	Protein sidekick-2	SDK2 KIAA1514							None	None	None	3	1	1	10490000	29130000	12929000	16665000				236500000		1.75163e+07			1	127.118	0.00458295	127.12	88.326	127.12	1	114.783	0.0086874	114.78	1	116.884	0.00780424	116.88	1	101.643	0.0181826	101.64	1	113.889	0.00942852	113.89
1113	Q58EX2	Protein sidekick-2	SDK2 KIAA1514							None	None	None	1	1	2			4801000	13750000			62829000	150030000				106429500	1	163.352	5.9433e-120	267.11	232.11	267.11									0.994711	22.7434	0.00150444	92.457	1	97.1289	1.57816e-28	165.64
1114	Q58EX2	Protein sidekick-2	SDK2 KIAA1514							None	None	None	0	1	0					9281700								1	148.268	3.52062e-14	148.27	89.287	148.27													1	90.9056	0.0115956	90.906
1115	Q58EX2	Protein sidekick-2	SDK2 KIAA1514					0.0802875	0.000365037	KBD Unique	OA Unique	Down	0	3	2				12158000	14926000	21958000	190720000	216500000			1.63473e+07	203610000	1	122.52	5.12666e-09	144.51	129.13	122.52									1	76.588	0.010481	76.588	1	119.617	0.000284504	119.62
1116	Q5CZ68	Uncharacterized protein DKFZp686D20108 (Fragment)	DKFZp686D20108							None	None	None	0	0	0													1	81.3106	0.00181873	81.311	69.025	81.311													1	63.1281	0.0113233	63.128
1117	Q5HYE3	Uncharacterized protein DKFZp686H1812	DKFZp686H1812							None	None	None	0	1	1				168560000			420080000						1	130.729	4.37916e-88	227.48	186.9	227.48													1	130.729	7.05292e-47	227.48
1118	Q5JRA6	Transport and Golgi organization protein 1 homolog (TANGO1) (C219-reactive peptide) (D320) (Melanoma inhibitory activity protein 3)	MIA3 KIAA0268 TANGO UNQ6077/PRO20088							None	None	None	0	1	0				4839500									1	121.012	1.06543e-08	174.77	161.39	174.77													1	121.012	1.06543e-08	174.77
1119	Q5JSG7	Proprotein convertase subtilisin/kexin type 5 (Fragment)	PCSK5							None	None	None	0	1	0				4990900									1	102.661	0.00216981	102.66	102.64	102.66													1	102.661	0.00216981	102.66
1120	Q5KU26	Collectin-12 (Collectin placenta protein 1) (CL-P1) (hCL-P1) (Nurse cell scavenger receptor 2) (Scavenger receptor class A member 4) (Scavenger receptor with C-type lectin)	COLEC12 CLP1 NSR2 SCARA4 SRCL							None	None	None	0	1	0				27683000									0.991194	20.5138	2.31365e-14	184.55	152.03	184.55													0.991194	20.5138	2.31365e-14	184.55
1121	Q5KU26	Collectin-12 (Collectin placenta protein 1) (CL-P1) (hCL-P1) (Nurse cell scavenger receptor 2) (Scavenger receptor class A member 4) (Scavenger receptor with C-type lectin)	COLEC12 CLP1 NSR2 SCARA4 SRCL							None	None	None	0	1	0				27683000									1	80.3303	2.31365e-14	184.55	152.03	184.55													1	80.3303	2.31365e-14	184.55
1122	Q5KU26	Collectin-12 (Collectin placenta protein 1) (CL-P1) (hCL-P1) (Nurse cell scavenger receptor 2) (Scavenger receptor class A member 4) (Scavenger receptor with C-type lectin)	COLEC12 CLP1 NSR2 SCARA4 SRCL							None	None	None	0	1	1				21527000			164430000						0.999987	49.01	0	372.73	345.3	242.07													0.999931	41.6342	5.17511e-59	235.21
1123	Q5KU26	Collectin-12 (Collectin placenta protein 1) (CL-P1) (hCL-P1) (Nurse cell scavenger receptor 2) (Scavenger receptor class A member 4) (Scavenger receptor with C-type lectin)	COLEC12 CLP1 NSR2 SCARA4 SRCL					0.138282	0.00437395	KBD Unique	OA Unique	Down	0	3	3				44397000	25800000	21776000	232700000	271070000	161340000		3.06577e+07	2.21703e+08	0.971943	15.3959	5.226e-86	258.78	205.66	88.101													0.79279	5.82747	5.226e-86	258.78
1124	Q5T795	Midasin (Fragment)	MDN1							None	None	None	1	1	0		45955000		8996600									1	65.3952	0.00423989	80.979	57.151	65.395					1	80.9793	0.00423989	80.979					1	65.3952	0.0329859	65.395
1125	Q5U000	Cathepsin Z								None	None	None	0	0	0													1	126.676	0.0021426	126.68	72.966	126.68
1126	Q687X5	Metalloreductase STEAP4 (EC 1.16.1.9) (Six-transmembrane epithelial antigen of prostate 4) (SixTransMembrane protein of prostate 2) (Tumor necrosis factor, alpha-induced protein 9)	STEAP4 STAMP2 TNFAIP9	3.96942	0.0715074	17.6855	0.101242	0.224445	0.0699994	None	None	None	2	3	3	18207000	27418000		128430000	69336000	73891000	234030000	649680000	326640000	22812500	9.05523e+07	403450000	1	153.331	1.23691e-73	261.58	189.97	153.33	1	129.889	9.53538e-05	129.89	1	175.153	1.12937e-05	175.15	1	69.0102	0.0421385	69.01	1	261.584	1.23691e-73	261.58
1127	Q68CP4	Heparan-alpha-glucosaminide N-acetyltransferase (EC 2.3.1.78) (Transmembrane protein 76)	HGSNAT TMEM76							None	None	None	0	1	0				8976000									1	140.485	1.17121e-05	140.49	114.93	140.49													1	140.485	1.17121e-05	140.49
1128	Q68CP4	Heparan-alpha-glucosaminide N-acetyltransferase (EC 2.3.1.78) (Transmembrane protein 76)	HGSNAT TMEM76							None	None	None	0	1	0				13479000									1	155.663	1.93258e-09	155.66	128.55	155.66													1	155.663	1.93258e-09	155.66
1129	Q68DQ2	Very large A-kinase anchor protein (vlAKAP) (Beta/gamma crystallin domain-containing protein 3)	CRYBG3							None	None	None	0	0	1								765230000					1	54.6997	0.0226409	54.7	23.81	54.7
1130	Q68DQ2	Very large A-kinase anchor protein (vlAKAP) (Beta/gamma crystallin domain-containing protein 3)	CRYBG3							None	None	None	0	0	1								765230000					1	54.6997	0.0226409	54.7	23.81	54.7
1131	Q6AZY7	Scavenger receptor class A member 3 (Cellular stress response gene protein)	SCARA3 CSR							None	OA Unique	OA Unique	0	0	2							74237000	165820000				120028500	1	211.676	2.60012e-57	211.68	196.36	211.68
1132	Q6AZY7	Scavenger receptor class A member 3 (Cellular stress response gene protein)	SCARA3 CSR							KBD Unique	None	KBD Unique	0	2	0					22377000	16319000					19348000		0.983297	17.6989	5.85619e-61	175.21	156.45	175.21													0.873238	8.38145	1.22069e-30	148.44
1133	Q6AZY7	Scavenger receptor class A member 3 (Cellular stress response gene protein)	SCARA3 CSR					0.0797687	0.0229288	None	None	Down	1	3	3		23847000		48786000	32799000	29485000	450800000	676190000	265410000		3.70233e+07	4.64133e+08	1	160.561	0.000158978	186.25	164.01	160.56					1	117.89	0.00101964	117.89	1	74.2687	0.0372446	74.269	1	148.523	0.000886076	148.52
1134	Q6AZY7	Scavenger receptor class A member 3 (Cellular stress response gene protein)	SCARA3 CSR							None	None	None	1	1	0		10612000		32615000									1	88.2641	0.000327572	88.264	67.668	88.264					1	64.2492	0.00740744	64.249					1	88.2641	0.000327572	88.264
1135	Q6AZY7	Scavenger receptor class A member 3 (Cellular stress response gene protein)	SCARA3 CSR							None	None	None	0	0	1								15055000					1	106.199	0.00595202	106.2	72.773	106.2
1136	Q6EMK4	Vasorin (Protein slit-like 2)	VASN SLITL2 UNQ314/PRO357/PRO1282							None	None	None	1	1	0		8161900		23840000									1	139.394	2.50555e-09	145.25	126.47	139.39					1	95.5732	0.00526277	95.573					1	145.248	0.000481723	145.25
1137	Q6FHG6	PRELP protein (Fragment)	PRELP							None	None	None	0	0	0													1	81.1436	3.15599e-12	95.71	83.767	81.144
1138	Q6FHG6	PRELP protein (Fragment)	PRELP							None	None	None	0	0	0													1	81.1436	3.15599e-12	95.71	83.767	81.144
1139	Q6IAG3	IL17B protein	IL17B							None	None	None	1	0	1			2363900				9586300						1	98.5231	0.0197227	98.523	61.364	98.523									1	94.2618	0.0215246	94.262
1140	Q6LDQ3	Sulfated glycoprotein 2 (Fragment)								None	None	OA Unique	1	0	3	26170000						22727000	46422000	53405000			4.08513e+07	1	91.6567	2.53057e-47	225.23	209.47	91.657	1	225.228	2.53057e-47	225.23	1	211.379	1.70642e-29	211.38	1	192.861	1.82563e-18	192.86
1141	Q6MZM7	Uncharacterized protein DKFZp686O12165 (Fragment)	DKFZp686O12165	3.76917	0.266273	16.0344	0.00170198	0.235068	0.00953906	None	Up	Down	3	3	3	163880000	5401100000	103720000	14414000000	3080000000	3872300000	35342000000	23921000000	31631000000	1.88957e+09	7122100000	30298000000	1	107.465	1.75855e-22	208.17	162.58	107.46	1	126.671	1.14832e-08	144.77	1	144.768	9.45455e-09	175.41	1	199.333	1.82529e-16	199.33	1	79.7406	8.26568e-09	154.84
1142	Q6N084	Uncharacterized protein DKFZp686L11144 (Fragment)	DKFZp686L11144							None	None	None	0	1	0				19623000									1	136.408	2.83478e-119	210.34	190.24	210.34													1	136.408	4.25875e-46	210.34
1143	Q6P528	ASPN protein	ASPN	12.0023	0.12408	82.7137	0.0002539	0.145106	0.00126998	None	Up	Down	3	3	3	557410000	456470000	309420000	10166000000	1900500000	3816100000	40342000000	38396000000	30717000000	441100000	5294200000	36485000000	1	102.704	8.19326e-192	308.91	260.49	171.73	1	86.8091	1.83992e-98	242.97	1	93.1352	3.38351e-79	260.22	1	72.2203	4.69824e-118	215.72	1	65.4127	1.1639e-147	291.08
1144	Q6Q4G3	Aminopeptidase Q (AP-Q) (APQ) (EC 3.4.11.-) (CHL2 antigen) (Laeverin)	LVRN AQPEP							None	None	None	0	0	0													1	84.3105	0.00499429	84.31	69.637	84.31
1145	Q6Q4G3	Aminopeptidase Q (AP-Q) (APQ) (EC 3.4.11.-) (CHL2 antigen) (Laeverin)	LVRN AQPEP							None	None	None	0	0	0													1	126.037	0.00235395	126.04	26.527	126.04
1146	Q6UVK1	Chondroitin sulfate proteoglycan 4 (Chondroitin sulfate proteoglycan NG2) (Melanoma chondroitin sulfate proteoglycan) (Melanoma-associated chondroitin sulfate proteoglycan)	CSPG4 MCSP	2.53948	0.110388	21.4407	0.155326	0.118442	0.179247	None	None	None	2	2	3	43334000	34130000		119510000		77208000	612010000	1469200000	410110000	38732000	98359000	830440000	1	199.029	1.93523e-131	249.96	238.49	199.03	1	213.771	5.44425e-85	213.77	1	196.151	7.65255e-72	196.15					1	179.805	5.19224e-67	179.81
1147	Q6UVK1	Chondroitin sulfate proteoglycan 4 (Chondroitin sulfate proteoglycan NG2) (Melanoma chondroitin sulfate proteoglycan) (Melanoma-associated chondroitin sulfate proteoglycan)	CSPG4 MCSP	0.351327	0.259344					None	CK Unique	KBD Unique	3	2	0	97825000	36760000	35654000	19130000		20743000				5.67463e+07	19936500		1	109.721	5.10167e-22	210.35	179.28	109.72	1	182.082	8.76264e-09	182.08	1	210.352	5.10167e-22	210.35	1	86.4628	5.10167e-22	210.35	1	176.425	4.0518e-08	176.42
1148	Q6UVK1	Chondroitin sulfate proteoglycan 4 (Chondroitin sulfate proteoglycan NG2) (Melanoma chondroitin sulfate proteoglycan) (Melanoma-associated chondroitin sulfate proteoglycan)	CSPG4 MCSP	0.351327	0.259344					None	CK Unique	KBD Unique	3	2	0	97825000	36760000	35654000	19130000		20743000				5.67463e+07	19936500		1	109.721	5.10167e-22	210.35	179.28	109.72	1	182.082	8.76264e-09	182.08	1	210.352	5.10167e-22	210.35	1	86.4628	5.10167e-22	210.35	1	176.425	4.0518e-08	176.42
1149	Q6UVK1	Chondroitin sulfate proteoglycan 4 (Chondroitin sulfate proteoglycan NG2) (Melanoma chondroitin sulfate proteoglycan) (Melanoma-associated chondroitin sulfate proteoglycan)	CSPG4 MCSP	1.57722	0.514191	19.4817	0.0577717	0.0809589	0.143221	None	None	None	3	2	3	69419000	56675000	52597000	155860000		32030000	910760000	1975200000	595250000	5.95637e+07	93945000	1.1604e+09	1	167.179	1.55346e-31	221.55	189.13	167.18	1	88.4407	9.84754e-05	124.67	1	105.204	2.49018e-09	160.67	1	188.961	1.24684e-12	188.96	1	178.713	7.31887e-10	178.71
1150	Q6UVK1	Chondroitin sulfate proteoglycan 4 (Chondroitin sulfate proteoglycan NG2) (Melanoma chondroitin sulfate proteoglycan) (Melanoma-associated chondroitin sulfate proteoglycan)	CSPG4 MCSP							None	None	None	0	0	0													1	113.099	5.52634e-19	113.1	94.266	113.1
1151	Q6UVK1	Chondroitin sulfate proteoglycan 4 (Chondroitin sulfate proteoglycan NG2) (Melanoma chondroitin sulfate proteoglycan) (Melanoma-associated chondroitin sulfate proteoglycan)	CSPG4 MCSP							None	None	None	0	0	0													1	113.099	5.52634e-19	113.1	94.266	113.1
1152	Q6UWX4	HHIP-like protein 2	HHIPL2 HHIP3 KIAA1822L UNQ841/PRO1779							None	None	None	1	0	0		40447000											1	115.76	3.7655e-08	115.76	111.31	115.76					1	115.76	3.7655e-08	115.76
1153	Q6UXX5	Inter-alpha-trypsin inhibitor heavy chain H6 (Inter-alpha-trypsin inhibitor heavy chain H5-like protein) (Inter-alpha inhibitor H5-like protein)	ITIH6 ITIH5L UNQ6369/PRO21074	0.506605	0.148273	4.93141	0.0127188	0.10273	0.0317908	None	Up	Down	3	2	3	26403000	48249000	31851000	22230000	13740000		146620000	238640000	139950000	35501000	17985000	175070000	0.998033	27.0534	1.36644e-30	201.06	173.79	201.06	0.846097	7.40175	0.000678785	95.666	0.964564	14.3489	1.4617e-22	182.17	0.891438	9.14414	9.59258e-09	131.71	0.879075	8.61508	0.000675636	95.094
1154	Q6UXX5	Inter-alpha-trypsin inhibitor heavy chain H6 (Inter-alpha-trypsin inhibitor heavy chain H5-like protein) (Inter-alpha inhibitor H5-like protein)	ITIH6 ITIH5L UNQ6369/PRO21074							None	None	None	0	0	0													1	49.266	0.00953493	49.266	41.82	49.266	1	47.0575	0.0121496	47.058	1	49.266	0.00953493	49.266
1155	Q6V0I7	Protocadherin Fat 4 (hFat4) (Cadherin family member 14) (FAT tumor suppressor homolog 4) (Fat-like cadherin protein FAT-J)	FAT4 CDHF14 FATJ Nbla00548							None	None	None	0	0	0													1	152.538	4.71919e-23	152.54	132.02	152.54
1156	Q6V0I7	Protocadherin Fat 4 (hFat4) (Cadherin family member 14) (FAT tumor suppressor homolog 4) (Fat-like cadherin protein FAT-J)	FAT4 CDHF14 FATJ Nbla00548							None	None	None	0	1	0				12504000									1	121.24	3.67345e-05	132.39	87.944	132.39													1	121.24	3.67345e-05	132.39
1157	Q6V0I7	Protocadherin Fat 4 (hFat4) (Cadherin family member 14) (FAT tumor suppressor homolog 4) (Fat-like cadherin protein FAT-J)	FAT4 CDHF14 FATJ Nbla00548							None	None	None	1	2	1			12277000	190530000		411230000			3993100000		300880000		1	58.831	0.0183185	84.17	31.38	58.831									1	45.2069	0.0435108	45.207	1	48.1115	0.0346231	48.112
1158	Q6YHK3	CD109 antigen (150 kDa TGF-beta-1-binding protein) (C3 and PZP-like alpha-2-macroglobulin domain-containing protein 7) (Platelet-specific Gov antigen) (p180) (r150) (CD antigen CD109)	CD109 CPAMD7	4.20521	0.0976603	19.2006	0.138462	0.219014	0.102334	None	None	None	2	3	3		61778000	44365000	249960000	302440000	117130000	600400000	1762800000	693820000	53071500	2.23177e+08	1.01901e+09	1	166.066	0.00188024	171.56	110.78	166.07					1	130.748	0.00188024	130.75	1	73.1566	0.0343196	73.157	1	171.565	0.00353483	171.56
1159	Q6YHK3	CD109 antigen (150 kDa TGF-beta-1-binding protein) (C3 and PZP-like alpha-2-macroglobulin domain-containing protein 7) (Platelet-specific Gov antigen) (p180) (r150) (CD antigen CD109)	CD109 CPAMD7							None	None	None	0	0	0													0.999919	40.8975	0.00996761	81.625	56.77	81.625
1160	Q6YHK3	CD109 antigen (150 kDa TGF-beta-1-binding protein) (C3 and PZP-like alpha-2-macroglobulin domain-containing protein 7) (Platelet-specific Gov antigen) (p180) (r150) (CD antigen CD109)	CD109 CPAMD7							None	None	None	0	1	0				10183000									1	98.5574	2.87761e-29	213.84	202.11	213.84													1	98.5574	2.87761e-29	213.84
1161	Q6YHK3	CD109 antigen (150 kDa TGF-beta-1-binding protein) (C3 and PZP-like alpha-2-macroglobulin domain-containing protein 7) (Platelet-specific Gov antigen) (p180) (r150) (CD antigen CD109)	CD109 CPAMD7					0.159417	0.0634272	None	None	None	1	2	3			53178000	318420000	215530000		1287800000	2429000000	1307300000		266975000	1674700000	1	152.272	6.47207e-06	164.64	136.82	152.27					1	77.6404	0.0317667	77.64	1	156.48	8.38759e-06	156.48	1	138.247	1.19198e-05	138.25
1162	Q6YHK3	CD109 antigen (150 kDa TGF-beta-1-binding protein) (C3 and PZP-like alpha-2-macroglobulin domain-containing protein 7) (Platelet-specific Gov antigen) (p180) (r150) (CD antigen CD109)	CD109 CPAMD7							None	OA Unique	None	0	1	3				46386000			200550000	525310000	202950000			3.09603e+08	1	262.878	7.58504e-190	307.15	291.94	277.31													1	240.634	7.59246e-94	256.57
1163	Q6YHK3	CD109 antigen (150 kDa TGF-beta-1-binding protein) (C3 and PZP-like alpha-2-macroglobulin domain-containing protein 7) (Platelet-specific Gov antigen) (p180) (r150) (CD antigen CD109)	CD109 CPAMD7							None	OA Unique	OA Unique	0	0	2								460600000	302050000			381325000	1	222.165	1.72977e-53	222.16	199.14	222.16													1	174.239	1.72977e-53	174.24
1164	Q6YHK3	CD109 antigen (150 kDa TGF-beta-1-binding protein) (C3 and PZP-like alpha-2-macroglobulin domain-containing protein 7) (Platelet-specific Gov antigen) (p180) (r150) (CD antigen CD109)	CD109 CPAMD7	3.36308	0.0492187	26.7819	0.011684	0.125573	0.0167226	Up	Up	Down	3	3	3	88816000	85349000	72020000	407460000	172430000	248050000	1744800000	3158700000	1689800000	8.20617e+07	275980000	2.19777e+09	1	330.408	6.55044e-229	330.41	301.61	330.41	1	82.1708	0.00527162	99.752	1	84.8822	3.39263e-05	132.44	1	205.523	1.19433e-37	205.52	1	121.36	0.000144987	127.83
1165	Q6ZMJ2	Scavenger receptor class A member 5 (Scavenger receptor hlg)	SCARA5 UNQ2938/PRO28700							None	None	None	0	0	0													1	67.385	0.0165628	67.385	52.241	67.385													1	67.385	0.0165628	67.385
1166	Q6ZMJ2	Scavenger receptor class A member 5 (Scavenger receptor hlg)	SCARA5 UNQ2938/PRO28700							None	None	None	0	1	1				5451200				117990000					1	183.722	6.5191e-06	183.72	140.48	183.72													1	102.061	0.00477046	102.06
1167	Q6ZSU2	Disks large homolog 2 (cDNA FLJ45207 fis, clone BRCAN2010665, highly similar to Channel associated protein of synapse-110)	DLG2							None	None	None	0	0	0													1	69.3834	0.0248457	81.381	42.163	69.383
1168	Q75T13	GPI inositol-deacylase (EC 3.1.-.-) (Post-GPI attachment to proteins factor 1) (hPGAP1)	PGAP1 UNQ3024/PRO9822							None	None	None	0	1	0				10899000									0.5	0	0.0018672	77.746	61.981	77.746													0.5	0	0.0018672	77.746
1169	Q75T13	GPI inositol-deacylase (EC 3.1.-.-) (Post-GPI attachment to proteins factor 1) (hPGAP1)	PGAP1 UNQ3024/PRO9822							None	None	None	0	1	0				10899000									0.5	0	0.0018672	77.746	61.981	77.746													0.5	0	0.0018672	77.746
1170	Q7LGC8	Carbohydrate sulfotransferase 3 (EC 2.8.2.17) (Chondroitin 6-O-sulfotransferase 1) (C6ST-1) (Chondroitin 6-sulfotransferase) (Galactose/N-acetylglucosamine/N-acetylglucosamine 6-O-sulfotransferase 0) (GST-0)	CHST3							None	None	None	2	1	1	15512000	14864000		4982300				43749000		15188000			1	128.847	7.08573e-33	169.65	155.99	128.85	1	136.957	5.01467e-07	136.96	1	169.652	4.27339e-09	169.65					1	90.6531	0.00375861	90.653
1171	Q7LGC8	Carbohydrate sulfotransferase 3 (EC 2.8.2.17) (Chondroitin 6-O-sulfotransferase 1) (C6ST-1) (Chondroitin 6-sulfotransferase) (Galactose/N-acetylglucosamine/N-acetylglucosamine 6-O-sulfotransferase 0) (GST-0)	CHST3	0.335907	0.0173987	4.48432	0.0206642	0.0749069	0.0415439	Down	Up	Down	3	2	3	76379000	98846000	103330000	21654000		40725000	243170000	492430000	513530000	9.28517e+07	31189500	4.16377e+08	1	135.767	0.0033538	161.11	75.752	135.77	1	138.826	0.0033538	138.83	1	103.748	0.0171436	103.75	1	103.748	0.00336657	147.08	1	159.197	0.00576852	159.2
1172	Q7Z7M9	Polypeptide N-acetylgalactosaminyltransferase 5 (EC 2.4.1.41) (Polypeptide GalNAc transferase 5) (GalNAc-T5) (pp-GaNTase 5) (Protein-UDP acetylgalactosaminyltransferase 5) (UDP-GalNAc:polypeptide N-acetylgalactosaminyltransferase 5)	GALNT5							None	None	None	0	1	0					7204700								1	110.977	6.99155e-06	150.1	138.61	110.98													1	150.103	6.99155e-06	150.1
1173	Q7Z7M9	Polypeptide N-acetylgalactosaminyltransferase 5 (EC 2.4.1.41) (Polypeptide GalNAc transferase 5) (GalNAc-T5) (pp-GaNTase 5) (Protein-UDP acetylgalactosaminyltransferase 5) (UDP-GalNAc:polypeptide N-acetylgalactosaminyltransferase 5)	GALNT5							None	None	None	0	1	1				13155000				117300000					1	139.947	1.92955e-20	139.95	127.02	139.95													1	64.4883	0.00336518	64.488
1174	Q7Z7M9	Polypeptide N-acetylgalactosaminyltransferase 5 (EC 2.4.1.41) (Polypeptide GalNAc transferase 5) (GalNAc-T5) (pp-GaNTase 5) (Protein-UDP acetylgalactosaminyltransferase 5) (UDP-GalNAc:polypeptide N-acetylgalactosaminyltransferase 5)	GALNT5							None	None	None	0	1	0				21692000									1	175.732	8.13431e-41	175.73	121.32	175.73													1	157.956	2.92023e-05	157.96
1175	Q86WC4	Osteopetrosis-associated transmembrane protein 1 (Chloride channel 7 beta subunit)	OSTM1 GL HSPC019 UNQ6098/PRO21201							None	None	None	0	1	0				11345000									1	202.559	1.02771e-16	202.56	156.88	202.56													1	202.559	1.02771e-16	202.56
1176	Q86XS5	Angiopoietin-related protein 5 (Angiopoietin-like protein 5)	ANGPTL5 UNQ5795/PRO19600							None	None	None	1	1	1		2397800			2835500			33421000					1	77.9225	0.015673	106.36	64.704	77.923					1	106.356	0.015673	106.36
1177	Q8IUX7	Adipocyte enhancer-binding protein 1 (AE-binding protein 1) (Aortic carboxypeptidase-like protein)	AEBP1 ACLP	27.7776	0.0627723	152.101	0.00926846	0.182626	0.0211786	None	Up	Down	3	3	3	49775000	45279000	19552000	1797900000	423670000	961910000	3555300000	7774300000	6102100000	38202000	1061160000	5.81057e+09	1	118.26	7.16128e-116	247.64	234.16	208.73	0.999999	58.699	2.49181e-30	144.48	1	75.3589	2.7549e-51	174.25	0.999997	55.6898	3.71598e-10	119.32	1	114.488	7.16128e-116	247.64
1178	Q8IUX7	Adipocyte enhancer-binding protein 1 (AE-binding protein 1) (Aortic carboxypeptidase-like protein)	AEBP1 ACLP					0.404319	0.24116	None	None	None	1	2	3		4801200		97150000		52607000	119600000	299210000	136780000		74878500	1.85197e+08	1	83.8618	7.23522e-09	176.6	140.07	83.862					1	71.0162	0.0277262	71.016					1	93.8207	7.23522e-09	176.6
1179	Q8IVN8	Somatomedin-B and thrombospondin type-1 domain-containing protein (RPE-spondin)	SBSPON C8orf84 RPESP							None	None	None	0	0	0													1	87.5265	5.64966e-83	181.26	172.76	181.26
1180	Q8IW00	V-set and transmembrane domain-containing protein 4 [Cleaved into: Peptide Lv]	VSTM4 C10orf72							CK Unique	CK Unique	None	2	0	0		21252000	8646600							14949300			1	87.149	0.000387437	126.07	89.672	87.149					1	126.067	0.000387437	126.07	1	118.177	0.000985514	118.18
1181	Q8IW00	V-set and transmembrane domain-containing protein 4 [Cleaved into: Peptide Lv]	VSTM4 C10orf72							None	OA Unique	None	0	1	2				7101700			31290000		44704000			37997000	1	151.257	1.55531e-09	151.26	130.32	151.26									1	71.0845	0.0221175	71.085	1	117.091	0.000455716	117.09
1182	X6RK76	Inositol 1,4,5-trisphosphate receptor-interacting protein (Fragment)	ITPRIP							None	None	None	0	1	0				3990700									1	113.003	0.000471898	116.77	98.02	116.77													1	113.003	0.000471898	116.77
1183	Q8IWU5	Extracellular sulfatase Sulf-2 (hSulf-2) (EC 3.1.6.-)	SULF2 KIAA1247 UNQ559/PRO1120			6.90544	0.0781695			None	None	None	3	1	3	62453000	88841000	47093000			9887500	377380000	218070000	774500000	66129000		456650000	1	192.281	0.000191936	192.28	176.08	192.28	1	143.004	0.00321869	143	1	178.604	0.00359724	178.6	1	190.494	0.000256116	190.49
1184	Q8IWU5	Extracellular sulfatase Sulf-2 (hSulf-2) (EC 3.1.6.-)	SULF2 KIAA1247 UNQ559/PRO1120			6.98061	0.014989			CK Unique	Up	OA Unique	3	0	3	33143000	26022000	20563000				159000000	135800000	261750000	26576000		1.85517e+08	1	78.6483	4.31469e-08	115.76	89.286	115.76	1	71.6714	4.31469e-08	115.76	1	78.6483	4.31469e-08	115.76	0.999999	60.2538	0.00172888	84.166
1185	Q8IWU5	Extracellular sulfatase Sulf-2 (hSulf-2) (EC 3.1.6.-)	SULF2 KIAA1247 UNQ559/PRO1120	0.10472	0.0633605	4.43487	0.121483	0.0236128	0.072684	None	None	None	2	2	3		105600000	65446000		6327900	11584000	454870000	170820000	512160000	85523000	8955950	3.79283e+08	1	202.963	6.39396e-72	252.82	232.83	202.96					1	165.176	1.52496e-05	165.18	1	252.824	6.39396e-72	252.82
1186	Q8IWU5	Extracellular sulfatase Sulf-2 (hSulf-2) (EC 3.1.6.-)	SULF2 KIAA1247 UNQ559/PRO1120							None	None	None	3	1	1	17819000	20400000	17962000	16794000			251230000			18727000			0.999998	57.2705	1.09429e-11	147.58	104.64	147.58	0.999871	38.9014	0.000314266	114.72	0.999983	47.7672	4.26604e-05	124.3	0.999897	39.8811	3.30678e-05	126.34	0.999841	37.9775	0.00197785	104.24
1187	Q8IWU5	Extracellular sulfatase Sulf-2 (hSulf-2) (EC 3.1.6.-)	SULF2 KIAA1247 UNQ559/PRO1120							None	None	None	0	0	0													0.310639	0	0.00706872	55.588	53.066	55.588									0.310639	0	0.00706872	55.588
1188	Q8IWU5	Extracellular sulfatase Sulf-2 (hSulf-2) (EC 3.1.6.-)	SULF2 KIAA1247 UNQ559/PRO1120							None	None	None	0	0	0													0.310639	0	0.00706872	55.588	53.066	55.588									0.310639	0	0.00706872	55.588
1189	Q8IWU5	Extracellular sulfatase Sulf-2 (hSulf-2) (EC 3.1.6.-)	SULF2 KIAA1247 UNQ559/PRO1120			7.37322	0.188553			CK Unique	None	OA Unique	2	0	2		22333000	15109000				198690000		77378000	18721000		138034000	0.99998	46.9598	8.39869e-70	206.94	200.85	206.94					0.99998	46.9598	8.39869e-70	206.94	0.998799	29.3705	4.32589e-10	118.57
1190	Q8IWY4	Signal peptide, CUB and EGF-like domain-containing protein 1	SCUBE1							None	None	None	0	1	0				14047000									1	70.4531	3.94012e-14	135.47	121.05	70.453													1	70.4531	3.94012e-14	135.47
1191	Q8IWY4	Signal peptide, CUB and EGF-like domain-containing protein 1	SCUBE1	2.40862	0.121832					None	None	None	3	2	1	25169000	73560000	12540000	95271000		83399000	63442000			3.70897e+07	89335000		1	134.903	4.24795e-14	172.82	161.76	134.9	1	124.62	1.82313e-05	124.62	1	142.098	1.32396e-12	150.57	1	94.4606	0.00129191	94.461	1	172.82	4.76097e-14	172.82
1192	Q8IZJ3	C3 and PZP-like alpha-2-macroglobulin domain-containing protein 8	CPAMD8 KIAA1283							CK Unique	CK Unique	None	2	0	0	7902000	10187000								9044500			1	83.8618	0.0102532	83.862	64.591	83.862	1	53.2519	0.0361975	53.252	1	61.4803	0.0271656	61.48	1	83.8618	0.0102532	83.862
1193	Q8IZJ3	C3 and PZP-like alpha-2-macroglobulin domain-containing protein 8	CPAMD8 KIAA1283							None	None	None	1	0	0			28268000										1	139.981	2.04028e-15	139.98	126.11	139.98	1	42.0519	0.0309554	42.052					1	139.981	2.04028e-15	139.98
1194	Q8N2E1	cDNA PSEC0226 fis, clone HEMBA1005833, moderately similar to Mus musculus carboxypeptidase X2 mRNA								None	OA Unique	None	0	1	2				10165000			74757000	143080000				108918500	1	208.109	5.74404e-18	208.11	158.69	208.11													1	192.639	3.11607e-08	192.64
1195	Q8N2E1	cDNA PSEC0226 fis, clone HEMBA1005833, moderately similar to Mus musculus carboxypeptidase X2 mRNA								None	None	None	0	1	0				12198000									1	95.9093	0.0209206	95.909	69.8	95.909													1	95.9093	0.0209206	95.909
1196	Q8N766	ER membrane protein complex subunit 1	EMC1 KIAA0090 PSEC0263					0.0853582	0.0600261	None	None	None	1	3	2	5772200			55685000	43758000	25328000		689350000	285140000		4.15903e+07	487245000	1	90.8095	3.09595e-22	220.1	179.11	220.1	0.993181	21.633	0.0365539	70.056	0.996782	24.9101	0.0280018	79.974					0.973165	15.5949	0.02933	73.841
1197	Q8NBJ5	Procollagen galactosyltransferase 1 (EC 2.4.1.50) (Collagen beta(1-O)galactosyltransferase 1) (ColGalT 1) (Glycosyltransferase 25 family member 1) (Hydroxylysine galactosyltransferase 1)	COLGALT1 GLT25D1 PSEC0241							None	None	None	0	0	0													0.5	0	0.00184332	68.653	58.277	68.653													0.5	0	0.00184332	68.653
1198	Q8NBJ5	Procollagen galactosyltransferase 1 (EC 2.4.1.50) (Collagen beta(1-O)galactosyltransferase 1) (ColGalT 1) (Glycosyltransferase 25 family member 1) (Hydroxylysine galactosyltransferase 1)	COLGALT1 GLT25D1 PSEC0241							None	OA Unique	None	0	1	3				45288000			151850000	420960000	170310000			2.47707e+08	0.998774	29.1101	1.30394e-31	187.31	156.72	186.23													0.998774	29.1101	2.63283e-31	186.23
1199	Q8NCG5	Carbohydrate sulfotransferase 4 (EC 2.8.2.-) (Galactose/N-acetylglucosamine/N-acetylglucosamine 6-O-sulfotransferase 3) (GST-3) (High endothelial cells N-acetylglucosamine 6-O-sulfotransferase) (HEC-GlcNAc6ST) (L-selectin ligand sulfotransferase) (LSST) (N-acetylglucosamine 6-O-sulfotransferase 2) (GlcNAc6ST-2) (Gn6st-2)	CHST4			5.15042	0.0240357			CK Unique	Up	OA Unique	3	0	3	15934000	29363000	32598000				189180000	86062000	125950000	25965000		1.33731e+08	1	180.673	5.34838e-31	230.06	171.25	180.67	1	91.8667	0.0132012	91.867	1	167.123	0.00176755	167.12	1	80.2312	4.3293e-06	191.1
1200	Q8TCJ2	Dolichyl-diphosphooligosaccharide--protein glycosyltransferase subunit STT3B (Oligosaccharyl transferase subunit STT3B) (STT3-B) (EC 2.4.99.18) (Source of immunodominant MHC-associated peptides homolog)	STT3B SIMP							None	None	None	1	1	3		18239000		82611000			211780000	721860000	289410000			4.07683e+08	1	81.3355	6.17597e-05	126.07	114.02	81.335					1	93.1105	0.00540082	93.111	1	68.5575	0.0378454	68.557	1	55.0839	0.00517128	89.08
1201	Q8TCJ2	Dolichyl-diphosphooligosaccharide--protein glycosyltransferase subunit STT3B (Oligosaccharyl transferase subunit STT3B) (STT3-B) (EC 2.4.99.18) (Source of immunodominant MHC-associated peptides homolog)	STT3B SIMP	3.87523	0.223818	20.816	0.0517076	0.186166	0.172793	None	None	None	3	2	3	33168000	30349000	18807000	175170000	37513000		347050000	966310000	400300000	2.74413e+07	106341500	571220000	0.876864	8.52673	1.09791e-138	279.86	238.65	185.33	0.875857	8.48591	1.43297e-29	176.81	0.870087	8.27033	3.9717e-25	155.03	0.781469	5.6592	0.000429429	99.413	0.875131	8.45702	2.14942e-29	175.51
1202	Q8TCJ2	Dolichyl-diphosphooligosaccharide--protein glycosyltransferase subunit STT3B (Oligosaccharyl transferase subunit STT3B) (STT3-B) (EC 2.4.99.18) (Source of immunodominant MHC-associated peptides homolog)	STT3B SIMP							None	None	None	0	1	0						58105000							0.588715	1.62855	0.000675353	91.475	82.378	91.475
1203	Q8WUJ3	Cell migration-inducing and hyaluronan-binding protein (EC 3.2.1.35)	CEMIP KIAA1199			1.90866	0.122093			None	None	None	2	1	2	13590000	17175000		3296800				34444000	24276000	15382500		29360000	1	117.16	0.000349928	129.4	89.855	117.16	1	129.397	0.00421595	129.4	1	117.16	0.00770001	117.16	1	127.844	0.000349928	127.84	1	88.9423	0.0234749	88.942
1204	Q92542	Nicastrin	NCSTN KIAA0253 UNQ1874/PRO4317	1.40031	0.069989					None	CK Unique	KBD Unique	2	3	0	16191000		11838000	21452000	19136000	18286000				14014500	1.96247e+07		1	106.624	5.37764e-10	117.21	104.02	106.62	1	109.264	1.04142e-06	109.26					1	68.0736	0.00108281	68.074	1	108.324	1.21246e-06	108.32
1205	Q92626	Peroxidasin homolog (EC 1.11.1.7) (Melanoma-associated antigen MG50) (Vascular peroxidase 1) (p53-responsive gene 2 protein)	PXDN KIAA0230 MG50 PRG2 VPO VPO1					0.117124	0.269771	KBD Unique	OA Unique	None	0	2	3				56202000		19173000	95142000	637120000	233060000		37687500	321774000	0.996666	24.7563	2.58329e-05	171.56	141.31	160.59													0.990008	19.9599	2.58329e-05	148.32
1206	Q92626	Peroxidasin homolog (EC 1.11.1.7) (Melanoma-associated antigen MG50) (Vascular peroxidase 1) (p53-responsive gene 2 protein)	PXDN KIAA0230 MG50 PRG2 VPO VPO1							None	None	None	0	1	0				11325000									0.998387	27.9158	5.29764e-05	128.85	124.38	128.85													0.998387	27.9158	5.29764e-05	128.85
1207	Q92626	Peroxidasin homolog (EC 1.11.1.7) (Melanoma-associated antigen MG50) (Vascular peroxidase 1) (p53-responsive gene 2 protein)	PXDN KIAA0230 MG50 PRG2 VPO VPO1							KBD Unique	None	None	0	2	1				82090000		49322000		1018900000			65706000		1	78.6898	3.8082e-29	213.18	165.34	78.69													1	97.7666	0.00128601	97.767
1208	Q92859	Neogenin (Immunoglobulin superfamily DCC subclass member 2)	NEO1 IGDCC2 NGN							None	None	None	0	0	0													1	123.948	4.84753e-12	123.95	101.37	123.95
1209	Q92896	Golgi apparatus protein 1 (CFR-1) (Cysteine-rich fibroblast growth factor receptor) (E-selectin ligand 1) (ESL-1) (Golgi sialoglycoprotein MG-160)	GLG1 CFR1 ESL1 MG160							KBD Unique	None	KBD Unique	0	3	0				37122000	16648000	24751000					2.61737e+07		1	102.277	0.000177711	118.13	94.647	102.28													1	118.127	0.000177711	118.13
1210	Q92896	Golgi apparatus protein 1 (CFR-1) (Cysteine-rich fibroblast growth factor receptor) (E-selectin ligand 1) (ESL-1) (Golgi sialoglycoprotein MG-160)	GLG1 CFR1 ESL1 MG160							None	OA Unique	OA Unique	0	0	3							10453000	33178000	14381000			1.93373e+07	1	129.466	0.00326844	144.38	74.377	129.47
1211	Q969P0	Immunoglobulin superfamily member 8 (IgSF8) (CD81 partner 3) (Glu-Trp-Ile EWI motif-containing protein 2) (EWI-2) (Keratinocytes-associated transmembrane protein 4) (KCT-4) (LIR-D1) (Prostaglandin regulatory-like protein) (PGRL) (CD antigen CD316)	IGSF8 CD81P3 EWI2 KCT4							KBD Unique	None	KBD Unique	0	2	0				10817000	9282600						10049800		1	82.1708	1.63802e-07	141.89	117.11	82.171	1	101.954	0.00377414	101.95									1	141.886	1.63802e-07	141.89
1212	Q969P0	Immunoglobulin superfamily member 8 (IgSF8) (CD81 partner 3) (Glu-Trp-Ile EWI motif-containing protein 2) (EWI-2) (Keratinocytes-associated transmembrane protein 4) (KCT-4) (LIR-D1) (Prostaglandin regulatory-like protein) (PGRL) (CD antigen CD316)	IGSF8 CD81P3 EWI2 KCT4							None	None	None	0	1	0				6507400									1	77.8466	0.00248797	77.847	68.059	77.847													1	77.8466	0.00248797	77.847
1213	Q96HE7	ERO1-like protein alpha (ERO1-L) (ERO1-L-alpha) (EC 1.8.4.-) (Endoplasmic oxidoreductin-1-like protein) (Endoplasmic reticulum oxidoreductase alpha) (Oxidoreductin-1-L-alpha)	ERO1A ERO1L UNQ434/PRO865							None	None	None	1	2	1		15109000		68989000		17481000		293310000			43235000		1	227.944	3.24241e-35	227.94	185.55	227.94	1	86.3444	0.0053817	86.344	1	105.165	0.00188851	105.17					1	202.034	9.04966e-13	202.03
1214	Q96JB6	Lysyl oxidase homolog 4 (EC 1.4.3.-) (Lysyl oxidase-like protein 4) (Lysyl oxidase-related protein C)	LOXL4 LOXC							None	None	None	0	1	0						26069000							1	97.3835	0.000982076	97.384	82.614	97.384
1215	Q96JQ0	Protocadherin-16 (Cadherin-19) (Cadherin-25) (Fibroblast cadherin-1) (Protein dachsous homolog 1)	DCHS1 CDH19 CDH25 FIB1 KIAA1773 PCDH16							None	None	None	0	0	0													1	86.0142	0.00958672	86.014	61.176	86.014
1216	Q96PD5	N-acetylmuramoyl-L-alanine amidase (EC 3.5.1.28) (Peptidoglycan recognition protein 2) (Peptidoglycan recognition protein long) (PGRP-L)	PGLYRP2 PGLYRPL PGRPL UNQ3103/PRO10102	2.03494	0.204826	6.18884	0.0034607	0.328808	0.0196113	None	Up	Down	3	3	2	30291000	64012000	24001000	119230000	36669000	84843000		268320000	219790000	3.94347e+07	8.02473e+07	244055000	1	76.7593	2.41001e-157	283.82	249.56	76.759	1	150.165	8.2393e-20	150.16	1	246.5	7.00894e-91	246.5	1	151.735	2.72451e-25	151.74	1	283.825	2.41001e-157	283.82
1217	Q96PD5	N-acetylmuramoyl-L-alanine amidase (EC 3.5.1.28) (Peptidoglycan recognition protein 2) (Peptidoglycan recognition protein long) (PGRP-L)	PGLYRP2 PGLYRPL PGRPL UNQ3103/PRO10102							None	None	None	0	1	0				17365000									1	131.037	2.82485e-15	131.04	119.18	131.04													1	131.037	2.82485e-15	131.04
1218	Q96RW7	Hemicentin-1 (Fibulin-6) (FIBL-6)	HMCN1 FIBL6							None	None	None	0	1	0				6557000									1	79.1482	0.0202615	79.148	42.128	79.148													1	79.1482	0.0202615	79.148
1219	Q96RW7	Hemicentin-1 (Fibulin-6) (FIBL-6)	HMCN1 FIBL6							None	None	None	0	1	0				13765000									1	164.425	0.00153286	164.43	123.4	164.43					1	68.6258	0.0457115	68.626					1	164.425	0.00153286	164.43
1220	X6RFN3	E3 ubiquitin-protein ligase RING2 (Fragment)	RNF2							None	OA Unique	OA Unique	0	0	3							251430000	590800000	252050000			364760000	1	67.3338	0.0159298	68.893	26.498	67.334
1221	Q9BU23	Lipase maturation factor 2 (Transmembrane protein 112B) (Transmembrane protein 153)	LMF2 TMEM112B TMEM153							None	OA Unique	None	0	1	2					4373500		49165000	206380000				127772500	1	235.312	1.03673e-84	235.31	199.8	235.31													1	175.744	1.96743e-09	175.74
1222	Q9BXX0	EMILIN-2 (Elastin microfibril interface-located protein 2) (Elastin microfibril interfacer 2) (Protein FOAP-10)	EMILIN2							None	None	None	0	1	1				51019000				114280000					0.99982	37.4407	8.81585e-27	151.33	137.43	147													0.976736	16.2308	8.81585e-27	151.33
1223	Q9BXX0	EMILIN-2 (Elastin microfibril interface-located protein 2) (Elastin microfibril interfacer 2) (Protein FOAP-10)	EMILIN2							None	None	None	0	1	0				62868000									1	94.8061	0.0213251	94.806	64.965	94.806													1	94.8061	0.0213251	94.806
1224	Q9BY76	Angiopoietin-related protein 4 (Angiopoietin-like protein 4) (Hepatic fibrinogen/angiopoietin-related protein) (HFARP) [Cleaved into: ANGPTL4 N-terminal chain; ANGPTL4 C-terminal chain]	ANGPTL4 ARP4 HFARP PGAR PP1158 PSEC0166 UNQ171/PRO197	0.629873	0.281248					None	CK Unique	KBD Unique	3	2	0	48822000	70661000	46653000		18639000	51124000				5.53787e+07	34881500		1	65.4225	9.12021e-15	168.61	143.75	65.423	1	102.577	0.000620849	102.58	1	68.5254	4.22917e-07	132.64	1	65.4225	9.12021e-15	155.2	1	168.607	3.85184e-14	168.61
1225	Q9H3R7	Dickkopf homolog 2 (Xenopus laevis), isoform CRA_a (Dickkopf-2 variant)	DKK2 hCG_19901							None	None	None	1	0	1		8041200					22943000						1	166.692	3.68035e-09	166.69	111.63	166.69					1	86.0142	0.00432826	86.014
1226	Q9HCB6	Spondin-1 (F-spondin) (Vascular smooth muscle cell growth-promoting factor)	SPON1 KIAA0762 VSGP							None	None	None	0	0	1								132780000					1	122.329	0.00049276	122.33	102.19	122.33
1227	Q9NP29	Microfibrillar protein 2 (Fragment)								None	OA Unique	OA Unique	0	0	2							276070000		385000000			330535000	0.999463	32.6958	0.0226411	67.605	31.849	67.605
1228	Q9NR99	Matrix-remodeling-associated protein 5 (Adhesion protein with leucine-rich repeats and immunoglobulin domains related to perlecan) (Adlican)	MXRA5							KBD Unique	None	None	0	3	1				57906000	17960000	25381000		279870000			33749000		0.999989	49.4129	1.55827e-31	153.94	136.34	153.94													0.999989	49.4129	1.55827e-31	153.94
1229	Q9NR99	Matrix-remodeling-associated protein 5 (Adhesion protein with leucine-rich repeats and immunoglobulin domains related to perlecan) (Adlican)	MXRA5							KBD Unique	None	None	0	3	1				57906000	17960000	25381000		279870000			33749000		1	120.914	1.55827e-31	153.94	136.34	153.94													1	120.914	1.55827e-31	153.94
1230	Q9NR99	Matrix-remodeling-associated protein 5 (Adhesion protein with leucine-rich repeats and immunoglobulin domains related to perlecan) (Adlican)	MXRA5					0.43352	0.142822	KBD Unique	OA Unique	None	0	2	3				122790000	18266000		122880000	181320000	183860000		70528000	1.62687e+08	1	143.556	0.024325	149.48	82.448	143.56													1	140.984	0.024325	140.98
1231	Q9NR99	Matrix-remodeling-associated protein 5 (Adhesion protein with leucine-rich repeats and immunoglobulin domains related to perlecan) (Adlican)	MXRA5							KBD Unique	None	KBD Unique	0	2	0				64471000		46561000					55516000		1	53.9473	0.0170378	69.314	52.289	53.947													1	69.3144	0.0170378	69.314
1232	Q9NR99	Matrix-remodeling-associated protein 5 (Adhesion protein with leucine-rich repeats and immunoglobulin domains related to perlecan) (Adlican)	MXRA5							None	None	None	0	0	0													1	114.186	0.0208764	114.19	75.984	114.19
1233	Q9NR99	Matrix-remodeling-associated protein 5 (Adhesion protein with leucine-rich repeats and immunoglobulin domains related to perlecan) (Adlican)	MXRA5	14.3173	0.185116	119.072	0.0157735	0.12024	0.00570451	None	Up	Down	2	3	3	5871000	11822000		221610000	37503000	120860000	907370000	1379300000	873440000	8846500	1.26658e+08	1053370000	1	103.255	1.00362e-34	225.67	210.52	103.26	1	81.2635	0.0116362	81.263	1	79.4891	0.013513	79.489					1	89.0288	1.00362e-34	225.67
1234	Q9NR99	Matrix-remodeling-associated protein 5 (Adhesion protein with leucine-rich repeats and immunoglobulin domains related to perlecan) (Adlican)	MXRA5					0.456647	0.159626	KBD Unique	OA Unique	None	0	3	3				160970000	42858000	54625000	194340000	265430000	106210000		86151000	188660000	1	68.8461	0.000327628	129.42	105.85	68.846													1	129.421	0.000583183	129.42
1235	Q9NR99	Matrix-remodeling-associated protein 5 (Adhesion protein with leucine-rich repeats and immunoglobulin domains related to perlecan) (Adlican)	MXRA5					0.103414	0.00402765	KBD Unique	OA Unique	Down	0	3	2				135690000	11585000	26506000		609580000	510710000		57927000	560145000	1	154.843	6.98433e-06	163.34	80.339	154.84													1	158.08	6.98433e-06	158.08
1236	Q9NR99	Matrix-remodeling-associated protein 5 (Adhesion protein with leucine-rich repeats and immunoglobulin domains related to perlecan) (Adlican)	MXRA5							None	None	None	0	1	0				26401000									0.999682	34.9682	8.55125e-196	251.03	209.74	251.03													0.98817	19.2183	1.05557e-29	198.57
1237	Q9NT22	EMILIN-3 (EMILIN-5) (Elastin microfibril interface-located protein 3) (Elastin microfibril interfacer 3) (Elastin microfibril interface-located protein 5) (Elastin microfibril interfacer 5)	EMILIN3 C20orf130 EMILIN5			2.446	0.0272322			None	Up	None	3	1	2	37832000	49453000	89250000	3346200			152310000	135560000		58845000		143935000	1	105.649	1.22969e-119	284.62	236.53	105.65	1	117.792	0.000423961	117.79	1	87.0009	1.64061e-26	221.91	1	79.659	0.000558036	115.14	1	63.7269	0.024254	63.727
1238	Q9NT22	EMILIN-3 (EMILIN-5) (Elastin microfibril interface-located protein 3) (Elastin microfibril interfacer 3) (Elastin microfibril interface-located protein 5) (Elastin microfibril interfacer 5)	EMILIN3 C20orf130 EMILIN5							None	None	None	0	0	0													1	45.1795	0.000568519	45.179	41.183	45.179					1	45.1795	0.000568519	45.179
1239	Q9NT22	EMILIN-3 (EMILIN-5) (Elastin microfibril interface-located protein 3) (Elastin microfibril interfacer 3) (Elastin microfibril interface-located protein 5) (Elastin microfibril interfacer 5)	EMILIN3 C20orf130 EMILIN5							None	None	None	1	0	0			9571900										1	137.451	1.44905e-21	137.45	123.22	137.45									1	137.451	1.44905e-21	137.45
1240	Q9P266	Junctional protein associated with coronary artery disease (JCAD)	JCAD KIAA1462							None	None	None	2	1	1		515270000	79434000			129180000	427640000			297352000			1	88.1361	0.00714604	88.136	18.972	88.136					1	82.645	0.0112626	82.645	1	81.9717	0.0364113	81.972
1241	Q9UBG0	C-type mannose receptor 2 (C-type lectin domain family 13 member E) (Endocytic receptor 180) (Macrophage mannose receptor 2) (Urokinase-type plasminogen activator receptor-associated protein) (UPAR-associated protein) (Urokinase receptor-associated protein) (CD antigen CD280)	MRC2 CLEC13E ENDO180 KIAA0709 UPARAP							None	None	None	0	1	1				46955000				125580000					1	147.84	5.08947e-65	177.4	157.01	147.84													1	177.403	5.08947e-65	177.4
1242	Q9UBG0	C-type mannose receptor 2 (C-type lectin domain family 13 member E) (Endocytic receptor 180) (Macrophage mannose receptor 2) (Urokinase-type plasminogen activator receptor-associated protein) (UPAR-associated protein) (Urokinase receptor-associated protein) (CD antigen CD280)	MRC2 CLEC13E ENDO180 KIAA0709 UPARAP					0.220612	0.177378	KBD Unique	OA Unique	None	0	3	3				19370000	5407000	4014800	12182000	81122000	37205000		9.59727e+06	43503000	1	190.531	7.49249e-78	254.19	222.77	190.53													1	164.038	1.41332e-08	164.04
1243	Q9UBG0	C-type mannose receptor 2 (C-type lectin domain family 13 member E) (Endocytic receptor 180) (Macrophage mannose receptor 2) (Urokinase-type plasminogen activator receptor-associated protein) (UPAR-associated protein) (Urokinase receptor-associated protein) (CD antigen CD280)	MRC2 CLEC13E ENDO180 KIAA0709 UPARAP					0.228714	0.120992	KBD Unique	OA Unique	None	0	3	2				70970000	37822000	68716000	135430000	381980000			5.91693e+07	258705000	1	179.935	3.67197e-06	179.94	145.73	179.94													1	80.0144	3.73245e-06	156.69
1244	Q9UBG0	C-type mannose receptor 2 (C-type lectin domain family 13 member E) (Endocytic receptor 180) (Macrophage mannose receptor 2) (Urokinase-type plasminogen activator receptor-associated protein) (UPAR-associated protein) (Urokinase receptor-associated protein) (CD antigen CD280)	MRC2 CLEC13E ENDO180 KIAA0709 UPARAP	10.295	0.24891	57.6316	0.0751086	0.178635	0.0506718	None	None	None	2	3	3	10418000	27959000		390450000	89197000	112990000	883210000	1726000000	708380000	19188500	1.97546e+08	1.10586e+09	1	189.584	3.80693e-31	223.14	206.12	189.58	1	93.0578	0.00563314	93.058	1	198.625	2.00032e-16	198.62					1	223.144	3.80693e-31	223.14
1245	Q9UBG0	C-type mannose receptor 2 (C-type lectin domain family 13 member E) (Endocytic receptor 180) (Macrophage mannose receptor 2) (Urokinase-type plasminogen activator receptor-associated protein) (UPAR-associated protein) (Urokinase receptor-associated protein) (CD antigen CD280)	MRC2 CLEC13E ENDO180 KIAA0709 UPARAP					0.236377	0.115071	None	None	None	1	2	3		6539200		224240000		38622000	550950000	800130000	316990000		131431000	5.56023e+08	1	164.796	1.65274e-178	300.75	264.07	292.49					1	94.1821	6.79566e-14	153.38					1	143.249	3.2488e-100	262.64
1246	Q9UBV2	Protein sel-1 homolog 1 (Suppressor of lin-12-like protein 1) (Sel-1L)	SEL1L TSA305 UNQ128/PRO1063							None	OA Unique	None	0	1	3				56630000			215990000	526740000	213100000			318610000	1	175.645	7.13421e-09	176.65	142.09	175.65													1	123.384	0.000305723	123.38
1247	Q9UBV2	Protein sel-1 homolog 1 (Suppressor of lin-12-like protein 1) (Sel-1L)	SEL1L TSA305 UNQ128/PRO1063							None	OA Unique	None	0	1	3				24612000			108470000	235800000	153620000			1.65963e+08	1	48.9684	1.53224e-05	112.55	104.45	48.968													1	111.621	2.11489e-05	111.62
1248	Q9UFM8	Neuroplastin (Fragment)	NPTN DKFZp566H1924	4.27675	0.0187485					Up	None	None	3	3	1	30963000	73703000	35293000	155330000	274360000	168880000			949560000	46653000	1.99523e+08		1	98.5231	0.0134711	109.01	74.188	98.523	1	83.2061	0.0284067	83.206	1	109.012	0.0134711	109.01	1	95.7414	0.0209822	95.741	1	103.833	0.0171017	103.83
1249	Q9UFM8	Neuroplastin (Fragment)	NPTN DKFZp566H1924							None	None	OA Unique	1	0	2		16938000					65500000	207710000				136605000	1	131.17	1.63178e-49	169.36	158.05	131.17	1	66.793	0.000149365	66.793	1	121.225	1.22073e-10	121.23
1250	Q9UFM8	Neuroplastin (Fragment)	NPTN DKFZp566H1924							None	None	None	0	0	0													1	91.8781	0.00233501	97.911	79.644	97.911													1	91.8781	0.00233501	97.911
1251	Q9UFM8	Neuroplastin (Fragment)	NPTN DKFZp566H1924							None	OA Unique	OA Unique	0	0	2							48310000	117950000				83130000	1	188.719	1.78456e-208	332.33	191.34	332.33													1	71.7845	0.0320852	107.66
1252	Q9UHL4	Dipeptidyl peptidase 2 (EC 3.4.14.2) (Dipeptidyl aminopeptidase II) (Dipeptidyl peptidase 7) (Dipeptidyl peptidase II) (DPP II) (Quiescent cell proline dipeptidase)	DPP7 DPP2 QPP	0.860826	0.781339	10.0872	2.8795e-05	0.0853385	5.62322e-05	None	Up	Down	3	3	3	29245000	28898000	10893000	37484000	8814000	13130000	241300000	238320000	216760000	23012000	1.98093e+07	2.32127e+08	1	109.421	1.11274e-90	249.41	228.11	109.42	1	164.678	4.29468e-29	164.68	1	139.107	8.35983e-15	139.11	1	120.112	1.93301e-08	120.11	1	188.491	2.7266e-34	188.49
1253	Q9UPN7	Serine/threonine-protein phosphatase 6 regulatory subunit 1 (SAPS domain family member 1)	PPP6R1 KIAA1115 PP6R1 SAPS1							KBD Unique	None	None	0	3	1				13442000	5697100	10575000		144520000			9904700		1	77.9225	0.0158454	77.923	18.941	77.923													1	72.4847	0.0316057	72.485
1254	Q9Y6C2	EMILIN-1 (Elastin microfibril interface-located protein 1) (Elastin microfibril interfacer 1)	EMILIN1 EMI							None	CK Unique	None	3	1	0	15127000	20238000	16317000	21418000						1.72273e+07			1	291.201	9.5467e-283	337.53	306.03	291.2	1	255.933	3.80773e-85	255.93	1	297.046	4.25062e-157	297.05	1	337.527	9.5467e-283	337.53	1	337.527	9.5467e-283	337.53
1255	Q9Y6C2	EMILIN-1 (Elastin microfibril interface-located protein 1) (Elastin microfibril interfacer 1)	EMILIN1 EMI	1.33139	0.75875	3.72139	0.00681827	0.357766	0.208757	None	Up	None	3	2	2	492040000	208800000	333210000	891820000		25993000	1406200000		1159200000	3.44683e+08	458906500	1282700000	1	201.059	4.33957e-146	286.1	218.39	201.06	1	286.096	4.33957e-146	286.1	1	254.448	4.53516e-94	254.45	1	244.556	2.65287e-80	244.56	1	193.19	1.67308e-25	193.19
1256	Q9Y6C2	EMILIN-1 (Elastin microfibril interface-located protein 1) (Elastin microfibril interfacer 1)	EMILIN1 EMI	0.710231	0.261339	7.0579	0.000807856	0.100629	0.000736162	None	Up	Down	3	3	3	615500000	423170000	454210000	533930000	225380000	300980000	3221800000	4162500000	3152300000	4.97627e+08	353430000	3512200000	1	156.013	8.57234e-192	308.55	238.45	156.01	1	308.547	8.57234e-192	308.55	1	273.436	5.6438e-110	273.44	1	265.002	1.97869e-93	265	1	267.016	1.30642e-93	267.02
1257	Q9Y6C2	EMILIN-1 (Elastin microfibril interface-located protein 1) (Elastin microfibril interfacer 1)	EMILIN1 EMI							None	None	None	0	1	0				665970000									1	124.374	4.74697e-17	158.53	48.653	124.37					1	132.094	0.000187464	132.09	1	155.735	1.10909e-16	155.73	1	155.735	0.0163833	155.73
1270	W0UUR6	Ribonuclease A F1 (Ribonuclease, RNase A family, 3 (Eosinophil cationic protein))	RAF1 RNASE3 hCG_40478							None	None	None	2	1	1	68027000		51170000	14771000					133960000	59598500			0.991975	20.921	1.41242e-05	112.07	103.88	105.5	0.805923	6.18493	0.00392163	69.763					0.991975	20.921	7.83519e-05	105.5	0.776965	5.57462	0.0314449	40.996
[truncated: 48 more columns]

## Sheet: KBD-CK
ID	Protein	Protein names	Gene names	Ratio KBD/CK	P Value KBD/CK	Significant KBD/CK	CK1	CK2	CK3	KBD1	KBD2	KBD3	Average CK	Average KBD	Localization prob	Score diff	PEP	Score	Delta score	Score for localization	Localization prob CK1	Score diff CK1	PEP CK1	Score CK1	Localization prob CK2	Score diff CK2	PEP CK2	Score CK2	Localization prob CK3	Score diff CK3	PEP CK3	Score CK3	Localization prob KBD1	Score diff KBD1	PEP KBD1	Score KBD1	Localization prob KBD2	Score diff KBD2	PEP KBD2	Score KBD2	Localization prob KBD3	Score diff KBD3	PEP KBD3	Score KBD3	Localization prob OA1	Score diff OA1	PEP OA1	Score OA1	Localization prob OA2
12	M0R122	Epithelial membrane protein 3	EMP3			CK Unique	17492000	27069000	24996000				2.31857e+07		0.841664	7.25559	0	304.51	287.49	205.8	0.841664	7.25559	8.60041e-24	205.8	0.84087	7.22975	1.45456e-18	193.81	0.817311	6.50676	1.25102e-72	250.69													0.839766	7.19403	0	304.51	0.702005
46	C9JN98	Glia-derived nexin (Fragment)	SERPINE2			CK Unique	110330000	91274000	56451000				8.60183e+07		1	208.556	1.68631e-18	208.56	189.24	208.56	1	171.616	1.76815e-05	171.62	1	166.692	1.69094e-05	166.69	1	193.965	7.08364e-09	193.96													1	142.068	1.61542e-10	142.07	1
96	K7EKF6	Angiopoietin-related protein 6	ANGPTL6			CK Unique		11116000	7941900				9528950		1	69.0301	0.00140176	107.97	89.632	69.03					1	107.966	0.00140176	107.97	1	105.252	0.00183055	105.25													1	69.0301	0.0155552	69.03
101	A0A024R7N5	Kelch-like 26 (Drosophila), isoform CRA_a	KLHL26 hCG_37049			CK Unique		1699600000	1336300000				1517950000		1	69.5982	0.011488	91.041	32.437	69.598					1	57.5984	0.0260793	57.598	1	67.9926	0.0161591	69.954	1	57.5984	0.0260582	57.598					1	57.5896	0.0260675	57.59	1	67.9926	0.0188548	67.993	1
111	Q53FU0	Carbohydrate sulfotransferase (EC 2.8.2.-) (Fragment)				CK Unique	7192800		8484300				7838550		1	80.9039	0.000169181	118.52	102.58	118.52	0.987539	18.9902	0.0390392	44.968					1	80.9039	0.000169181	118.52
115	X6RH99	Alpha-N-acetylgalactosaminide alpha-2,6-sialyltransferase 6 (Fragment)	ST6GALNAC6			CK Unique		16708000	10140000				13424000		1	80.1654	0.0233238	89.355	46.108	80.165					1	89.3546	0.0233238	89.355	1	80.1654	0.0315421	80.165
157	A0A3B3IRN5	Fibromodulin	FMOD			CK Unique	596220000	212060000	2121000000				9.76427e+08		1	97.7209	3.30088e-243	297.87	290.08	297.87	1	97.7209	3.30088e-243	297.87	1	94.09	2.80142e-136	236.73	1	95.3856	4.57837e-95	205.09													0.999861	38.7223	1.33922e-12	86.507	1
166	E5RJA8	Carboxypeptidase Q (Fragment)	CPQ			CK Unique	37215000	32550000					34882500		1	103.497	1.22876e-16	201.75	146.18	201.75	1	103.497	1.22876e-16	201.75	1	82.7304	1.20025e-08	161.67	1	64.6653	2.27105e-16	150.04													0.999989	49.4657	2.05221e-10	138.71
260	A0A087WXP0	Azurocidin	AZU1			CK Unique	64877000		75511000				70194000		1	258.82	3.30373e-181	258.82	232.7	258.82	1	214.239	2.76883e-69	214.24	1	233.791	3.30373e-181	233.79	1	142.325	3.40008e-89	231.77
261	A0A087WXP0	Azurocidin	AZU1			CK Unique	64877000		75511000				70194000		1	258.82	3.30373e-181	258.82	232.7	258.82	1	214.239	2.76883e-69	214.24	1	233.791	3.30373e-181	233.79	1	142.325	3.40008e-89	231.77
318	A0A0A6YY99	Protein TNFSF12-TNFSF13	TNFSF12-TNFSF13			CK Unique	11177000	23128000	16842000				17049000		1	124.834	0.00495051	124.83	57.841	124.83	1	91.6263	0.0224909	91.626	1	124.834	0.00495051	124.83	1	124.834	0.00495051	124.83
333	A6NL68	Solute carrier family 2, facilitated glucose transporter member 1 (Fragment)	SLC2A1			CK Unique	89549000	87845000	118690000				9.86947e+07		1	163.507	2.82393e-40	227.94	204.62	163.51	1	121.041	0.000227784	121.04	1	227.196	3.15959e-40	227.2	1	93.3481	2.88491e-40	227.81													1	163.507	2.82393e-40	227.94	1
338	B4E2U4	cDNA FLJ52115, highly similar to HLA class II histocompatibility antigen, DRalpha chain				CK Unique	11266000		14034000				12650000		1	77.0577	0.0171426	91.626	26.374	77.058	1	75.8543	0.025479	75.854					1	91.6263	0.0171426	91.626													1	75.8543	0.025479	75.854
362	A0A0U1RQT9	Synaptophysin-like protein 1 (Fragment)	SYPL1			CK Unique	13527000	26217000	22374000				20706000		0.999988	49.3394	3.88547e-21	178.22	148.92	178.22	0.999988	49.3394	3.88547e-21	178.22	0.99982	37.4357	0.000268622	105.95	0.999717	35.4862	0.00202315	83.53
409	A0A1W2PNW4	Vascular endothelial growth factor receptor 1	FLT1			CK Unique	5522200	4013200					4767700		1	87.4761	0.0131499	88.948	71.562	87.476	1	76.0641	0.0250871	76.064	1	88.9479	0.0141715	88.948																	1	88.9479	0.0131499	88.948
410	A0A1W2PNW4	Vascular endothelial growth factor receptor 1	FLT1			CK Unique	10621000	13503000	9882400				1.13355e+07		1	130.993	1.39638e-15	151.1	139.79	151.1	1	81.035	0.000112941	106.35	1	95.0067	1.09683e-06	119.96	1	69.0001	0.000924834	96.208																	1
432	A0A2R8YCX5	Semaphorin-3E	SEMA3E			CK Unique	26281000	30348000					28314500		0.947693	12.5811	1.51698e-15	140.63	127.57	140.63	0.947693	12.5811	1.51698e-15	140.63	0.912215	10.1668	0.00159768	85.224
475	A0A384NKS6	Clusterin				CK Unique	79069000		1787100000				933084500		1	79.3523	1.07585e-204	250.46	216.41	250.46	0.99998	46.911	1.96893e-48	162.37	0.99342	21.7875	0.0231651	61.212	0.654436	2.77549	0.0284515	58.158	0.5	0	1.83893e-08	110.98									1	68.819	1.58932e-60	194.55	0.989843
477	A0A384NKS6	Clusterin				CK Unique	2614500	4413900					3514200		1	83.5305	6.39615e-11	115.57	100.19	83.53	1	67.9969	6.39615e-11	115.57	1	83.5305	0.00236682	83.53
478	A0A384NKS6	Clusterin				CK Unique	2614500	4413900					3514200		1	83.5305	6.39615e-11	115.57	100.19	83.53	1	67.9969	6.39615e-11	115.57	1	83.5305	0.00236682	83.53
511	H0YEA7	N-acetylglucosamine-1-phosphotransferase subunit gamma (Fragment)	GNPTG			CK Unique	11350000	11483000	10816000				1.12163e+07		1	140.017	1.12911e-10	140.02	127.18	140.02	1	40.0847	3.85627e-08	130.56	1	100.042	0.000636156	100.04	1	140.017	1.12911e-10	140.02
516	A3KMG0	MATN1 protein (Fragment)	MATN1			CK Unique	13696000	20982000	33779000				22819000		1	251.837	2.46718e-81	251.84	235.36	251.84	1	251.837	2.46718e-81	251.84	1	203.317	1.86614e-30	203.32	1	251.837	2.46718e-81	251.84
603	K7EPJ4	Cartilage intermediate layer protein 2 (Cartilage intermediate layer protein 2, isoform CRA_b)	CILP2 hCG_38566			CK Unique		9383500	9670200				9526850		1	51.5572	4.19133e-06	100.68	94.029	51.557					1	100.678	4.19133e-06	100.68	1	51.5572	0.000934445	51.557
619	X6R8F3	Neutrophil gelatinase-associated lipocalin	LCN2			CK Unique		18288000	9087400				13687700		1	88.3919	0.0107714	98.055	85.018	88.392					1	98.0545	0.0107714	98.055	1	70.5516	0.0356088	70.552																	1
626	B3KNV8	Polypeptide N-acetylgalactosaminyltransferase (EC 2.4.1.-) (Protein-UDP acetylgalactosaminyltransferase)				CK Unique	2238100	3899700					3068900		1	99.8021	0.0117113	105.57	46.362	99.802	1	83.2061	0.0239711	83.206	1	69.5982	0.0400654	69.598																	1	71.8775	0.036385	71.877	1
735	B4E282	cDNA FLJ52401, highly similar to Integrin alpha-10				CK Unique	3388400	5876200	4865100				4709900		1	136.163	2.90292e-86	265.55	216.13	265.55	0.999998	56.3206	0.00026494	123.88	1	75.4436	1.08663e-05	161.17	0.999996	53.7799	0.000146577	127.76													1	123.502	4.82963e-59	248.68	1
879	O00300	Tumor necrosis factor receptor superfamily member 11B (Osteoclastogenesis inhibitory factor) (Osteoprotegerin)	TNFRSF11B OCIF OPG			CK Unique	66327000	226660000	137540000				143509000		1	167.199	2.95781e-109	272.32	265.43	167.2	1	259.347	2.38694e-78	259.35	1	82.1708	2.95781e-109	272.32	1	71.5551	2.07123e-64	244.71	1	199.185	3.84744e-83	199.19									1	215.077	1.92284e-100	215.08
884	O00300	Tumor necrosis factor receptor superfamily member 11B (Osteoclastogenesis inhibitory factor) (Osteoprotegerin)	TNFRSF11B OCIF OPG			CK Unique	32421000	62808000	22645000				3.92913e+07		1	103.604	1.50149e-298	350.02	307.83	103.6	1	326.946	1.73805e-241	326.95	1	350.019	1.50149e-298	350.02	1	300.223	3.65045e-169	300.22	1	49.5946	0.0363449	49.595									1	103.604	0.000687428	103.6
901	O43854	EGF-like repeat and discoidin I-like domain-containing protein 3 (Developmentally-regulated endothelial cell locus 1 protein) (Integrin-binding protein DEL1)	EDIL3 DEL1			CK Unique	15936000	51403000					33669500		0.999998	57.4604	4.05918e-06	128.85	109.72	107.09	0.995615	23.561	0.0299869	59.155	0.99994	42.229	0.00212906	103.46	0.999998	57.4604	0.00211662	107.09																	0.999996
914	O75339	Cartilage intermediate layer protein 1 (CILP-1) (Cartilage intermediate-layer protein) [Cleaved into: Cartilage intermediate layer protein 1 C1; Cartilage intermediate layer protein 1 C2]	CILP UNQ602/PRO1188			CK Unique	32611000	64606000	60591000				5.26027e+07		1	319.436	0	455.05	416.25	455.05	1	228.375	1.68883e-228	300.56	1	222.462	1.08814e-228	303.07	1	147.787	5.8063e-90	229.1													1	189.503	0	410.55	1
947	P05164	Myeloperoxidase (MPO) (EC 1.11.2.2) [Cleaved into: Myeloperoxidase; 89 kDa myeloperoxidase; 84 kDa myeloperoxidase; Myeloperoxidase light chain; Myeloperoxidase heavy chain]	MPO			CK Unique	12763000	6940700					9851850		1	69.6021	7.61198e-11	138.55	106.21	138.55	0.999968	44.9251	0.000685133	86.479	0.999409	32.2802	0.00807822	64.83																					1
996	V9HWC6	Peptidyl-prolyl cis-trans isomerase (PPIase) (EC 5.2.1.8)	HEL-S-39			CK Unique	23784000	32560000	26914000				2.77527e+07		1	244.003	1.45613e-127	285.13	245.13	244	1	224.658	8.0304e-32	224.66	1	224.658	8.0304e-32	224.66	1	71.0845	1.45613e-127	285.13													1	205.07	4.07005e-17	205.07
1030	P51888	Prolargin (Proline-arginine-rich end leucine-rich repeat protein)	PRELP SLRR2A			CK Unique	363790000		20852000				192321000		1	118.053	1.24639e-45	148.87	135.78	148.87	1	118.053	1.24639e-45	148.87	0.99999	50.1917	6.89362e-05	70.647	0.999908	40.3615	0.00252419	52.707					1	116.879	1.94658e-45	147.18	1	93.1893	2.51793e-30	131.56	1	96.572	1.27028e-36	137.62
1041	P80108	Phosphatidylinositol-glycan-specific phospholipase D (PI-G PLD) (EC 3.1.4.50) (Glycoprotein phospholipase D) (Glycosyl-phosphatidylinositol-specific phospholipase D) (GPI-PLD) (GPI-specific phospholipase D)	GPLD1 PIGPLD1			CK Unique		19578000	18406000				18992000		1	64.3531	0.0217775	132.09	108.3	132.09					1	64.3531	0.0217775	132.09	0.99985	38.2501	0.0339738	102.77
1048	Q02413	Desmoglein-1 (Cadherin family member 4) (Desmosomal glycoprotein 1) (DG1) (DGI) (Pemphigus foliaceus antigen)	DSG1 CDHF4			CK Unique	6458800		5888900				6173850		1	191.527	1.19089e-08	191.53	166.39	191.53	1	75.7881	0.0215293	75.788					1	108.348	0.0036615	108.35													1	185.993	1.04765e-06	185.99
1097	Q14766	Latent-transforming growth factor beta-binding protein 1 (LTBP-1) (Transforming growth factor beta-1-binding protein 1) (TGF-beta1-BP-1)	LTBP1			CK Unique	46166000	45681000	38180000				4.33423e+07		1	102.39	9.4332e-21	155.24	128.46	102.39	1	44.0288	0.000131963	104.84	1	48.3756	7.21957e-11	138.75	1	92.1328	0.00120902	92.133																	1
1180	Q8IW00	V-set and transmembrane domain-containing protein 4 [Cleaved into: Peptide Lv]	VSTM4 C10orf72			CK Unique		21252000	8646600				14949300		1	87.149	0.000387437	126.07	89.672	87.149					1	126.067	0.000387437	126.07	1	118.177	0.000985514	118.18									1	87.9133	0.0139713	87.913
1184	Q8IWU5	Extracellular sulfatase Sulf-2 (hSulf-2) (EC 3.1.6.-)	SULF2 KIAA1247 UNQ559/PRO1120			CK Unique	33143000	26022000	20563000				26576000		1	78.6483	4.31469e-08	115.76	89.286	115.76	1	71.6714	4.31469e-08	115.76	1	78.6483	4.31469e-08	115.76	0.999999	60.2538	0.00172888	84.166													0.999998	56.9978	0.00136398	89.831	0.999995
1189	Q8IWU5	Extracellular sulfatase Sulf-2 (hSulf-2) (EC 3.1.6.-)	SULF2 KIAA1247 UNQ559/PRO1120			CK Unique		22333000	15109000				18721000		0.99998	46.9598	8.39869e-70	206.94	200.85	206.94					0.99998	46.9598	8.39869e-70	206.94	0.998799	29.3705	4.32589e-10	118.57													0.99881	30.0565	2.33051e-53	183.15
1192	Q8IZJ3	C3 and PZP-like alpha-2-macroglobulin domain-containing protein 8	CPAMD8 KIAA1283			CK Unique	7902000	10187000					9044500		1	83.8618	0.0102532	83.862	64.591	83.862	1	53.2519	0.0361975	53.252	1	61.4803	0.0271656	61.48	1	83.8618	0.0102532	83.862
1199	Q8NCG5	Carbohydrate sulfotransferase 4 (EC 2.8.2.-) (Galactose/N-acetylglucosamine/N-acetylglucosamine 6-O-sulfotransferase 3) (GST-3) (High endothelial cells N-acetylglucosamine 6-O-sulfotransferase) (HEC-GlcNAc6ST) (L-selectin ligand sulfotransferase) (LSST) (N-acetylglucosamine 6-O-sulfotransferase 2) (GlcNAc6ST-2) (Gn6st-2)	CHST4			CK Unique	15934000	29363000	32598000				25965000		1	180.673	5.34838e-31	230.06	171.25	180.67	1	91.8667	0.0132012	91.867	1	167.123	0.00176755	167.12	1	80.2312	4.3293e-06	191.1													1	202.203	5.39969e-10	202.2	1
44	H0Y7Y8	AT-rich interactive domain-containing protein 4B (Fragment)	ARID4B	0.472597	0.0357424	Down	1180500000	1474100000	1079700000	935930000	441340000	387550000	1.24477e+09	5.88273e+08	0.687764	3.42956	0.00352731	134.66	43.678	122.5	0.5	0	0.00643153	120.52	0.5	0	0.0176248	102.77	0.5	0	0.0100808	113.1	0.5	0	0.00352731	134.66	0.5	0	0.0336747	78.178	0.5	0	0.0148555	115.46	0.5	0	0.00638481	120.65	0.5
72	H0YD65	Cathepsin F (Fragment)	CTSF	0.244792	0.0018265	Down	145710000	106170000	130510000	21436000	29341000	42829000	1.27463e+08	31202000	1	153.672	0.00337595	158.03	138.55	158.03	1	142.981	0.00337595	147.34	1	153.222	0.00528762	157.58	1	153.672	0.00542129	158.03	1	116.265	0.00639388	120.62	1	123.487	0.00446605	127.84	1	108.013	0.0106878	112.37					1
112	Q53FU0	Carbohydrate sulfotransferase (EC 2.8.2.-) (Fragment)		0.237109	0.00760565	Down	40066000	69194000	60717000	11941000	14307000	14055000	56659000	1.34343e+07	1	151.735	2.03573e-23	151.99	135.05	151.74	1	119.867	0.000274564	119.87	1	142.851	5.63463e-09	142.85	1	142.851	5.63463e-09	142.85	1	126.948	7.24077e-05	126.95	1	68.034	0.0153907	68.034	1	98.5924	0.00210259	98.592	1	142.851	5.59078e-16	142.85	1
113	Q9UKU9	Angiopoietin-related protein 2 (Angiopoietin-like protein 2)	ANGPTL2 ARP2 UNQ170/PRO196	0.219252	0.0107659	Down	848570000	1448300000	1264700000	457790000	104850000	218240000	1187190000	2.60293e+08	1	59.7055	3.3748e-169	300.78	247.03	59.705	1	218.012	1.98454e-65	249.2	1	286.186	2.41707e-128	286.19	1	174.681	5.97637e-110	273.04	1	300.782	3.3748e-169	300.78	1	89.3005	2.49511e-31	219.42	1	243.525	5.30791e-65	243.53	1	289.754	1.37415e-147	289.75	1
114	Q9UKU9	Angiopoietin-related protein 2 (Angiopoietin-like protein 2)	ANGPTL2 ARP2 UNQ170/PRO196	0.262893	0.00473373	Down	421270000	414400000	288400000	98411000	59949000	137150000	374690000	9.85033e+07	1	133.759	5.36053e-295	332.63	317.35	133.76	1	46.5581	6.26885e-78	232.87	1	108.405	7.23174e-103	247.34	1	277.068	3.88553e-151	277.07	1	115.837	1.77532e-294	326.87	1	128.124	1.0676e-13	128.12	1	238.631	9.20168e-90	238.63	1	66.8498	5.1993e-215	303.76	1
145	A0A3B3IRN5	Fibromodulin	FMOD	0.484299	0.0325599	Down	2843400000		3102200000	1310100000	2021800000	987270000	2972800000	1.43972e+09	0.974759	18.5423	8.2783e-57	148.22	137.94	43.903	0.974759	18.5423	8.2783e-57	137.44	0.686071	6.22308	2.43901e-54	135.7	0.59209	0	1.95226e-25	110.25	0.581151	3.30082	1.61456e-45	148.22	0.762052	5.36076	6.80478e-55	140.45	0.658724	3.30376	3.38998e-54	133.13	0.766528	6.22464	1.80546e-41	127.92	0.609955
146	A0A3B3IRN5	Fibromodulin	FMOD	0.250266	0.00330812	Down	2843400000		3390400000	515290000	837600000	987270000	3116900000	7.80053e+08	0.997287	27.4817	4.08904e-64	150.4	140.43	126.8	0.98822	20.4252	8.2783e-57	137.44					0.59209	0	9.21879e-36	119.64	0.771716	6.06025	1.61456e-45	148.22	0.651743	0	6.80478e-55	140.45	0.623073	8.16037	9.56614e-36	119.42	0.761042	5.82008	1.80546e-41	121.23	0.997287
286	A0A087X1T7	Aggrecan core protein	ACAN	0.223159	0.0286173	Down	3305500000	6699300000	3827800000	1313500000	1069400000	703970000	4.61087e+09	1.02896e+09	1	229.48	7.22867e-46	237.92	225.88	229.48	1	94.6921	4.67851e-05	166.19	1	117.698	1.74669e-06	187.16	1	87.2981	8.08192e-09	196.27	1	152.973	2.14351e-05	152.97	1	166.187	5.24668e-05	166.19	1	137.953	3.50067e-05	137.95	1	216.123	1.4936e-25	216.12	1
373	A0A140VJU8	Superoxide dismutase [Cu-Zn] (EC 1.15.1.1)		0.240507	0.021327	Down	2582100000	3171700000	2157500000	1552400000	162960000	187360000	2637100000	634240000	1	255.079	2.2167e-127	267.93	251.79	255.08	1	51.2109	4.67264e-120	267.93	1	143.459	4.34103e-104	255.85	1	266.893	6.28647e-120	266.89	1	246.859	3.42498e-90	246.86	1	65.805	0.0141055	65.805	1	240.112	2.2167e-127	240.11	1	141.185	5.53623e-15	141.18	1
392	A0A1B0RPQ5	Anosmin-1 (EC 3.4.21.4)	ANOS1	0.238187	0.0386172	Down	177560000	93930000	87463000	30820000	14009000	40669000	119651000	2.84993e+07	1	194.501	3.82297e-41	230.41	198.57	194.5	1	215.502	1.48659e-24	215.5	1	230.412	3.82297e-41	230.41	1	203.828	1.59055e-17	203.83	1	203.828	1.59055e-17	203.83	1	129.156	4.78822e-05	129.16	1	199.089	4.20027e-17	199.09	1	185.769	1.51408e-10	185.77	1
472	A0A384NKS6	Clusterin		0.0799406	0.010042	Down	1361200000	1788800000	1230100000	217360000		16072000	1.46003e+09	116716000	1	144.151	4.7156e-150	276.34	264.54	144.15	1	45.3692	1.62146e-19	137.36	1	45.6957	4.50864e-76	225.37	1	276.336	4.7156e-150	276.34	1	154.073	2.06484e-31	154.07					1	95.48	8.22897e-11	95.48	1	102.803	5.15863e-50	203.78	1
473	A0A384NKS6	Clusterin		0.237166	0.00307997	Down	98894000000	118390000000	88325000000	35860000000	7894000000	28726000000	1.0187e+11	24160000000	1	69.3488	0	393.42	369.19	69.349	1	198.625	0	386.44	1	88.441	4.12148e-234	264.28	1	78.692	0	360.32	1	138.449	4.02587e-216	322.01	1	59.5419	0	393.42	1	91.936	0	385.54	1	158.563	1.40186e-293	337.64	1
474	A0A384NKS6	Clusterin		0.164495	0.0317132	Down	2939900000	1951700000	1146400000	376140000	325760000	291320000	2.01267e+09	3.31073e+08	1	215.775	0	423.1	373.98	250.46	1	206.531	0	384.67	1	297.65	0	423.1	1	273.07	0	346.63	1	253.668	1.4523e-251	319.91	1	244.727	1.10783e-200	302.41	1	213.751	1.6431e-200	299.89	1	160.861	2.47778e-252	324.94	1
604	K7EPJ4	Cartilage intermediate layer protein 2 (Cartilage intermediate layer protein 2, isoform CRA_b)	CILP2 hCG_38566	0.114154	0.0377451	Down	468880000	1347800000	1476800000	140910000	67953000	167100000	1.09783e+09	125321000	1	208.589	5.38994e-18	208.59	185.85	208.59	1	160.531	3.32159e-05	160.53	1	170.471	6.33476e-05	170.47	1	163.427	4.27685e-05	163.43	1	163.16	4.18299e-05	163.16	1	105.396	0.00425956	105.4	1	165.584	5.03478e-05	165.58	1	185.327	4.28749e-06	185.33	1
605	K7EPJ4	Cartilage intermediate layer protein 2 (Cartilage intermediate layer protein 2, isoform CRA_b)	CILP2 hCG_38566	0.223036	0.00915733	Down	208060000	319680000	225470000	75843000	11175000	80975000	251070000	5.59977e+07	1	81.5653	5.49896e-72	254.07	210.79	81.565	1	111.388	1.19011e-05	138.45	1	152.854	5.11329e-06	152.85	1	124.302	5.49896e-72	254.07	1	72.8912	0.0128545	72.891	1	69.0301	0.0173813	69.03	1	88.1865	0.00713706	88.187					1
633	Q5H9B4	Metalloproteinase inhibitor 1 (Fragment)	TIMP1	0.329555	0.00550311	Down	650130000	775040000	821770000	378580000	113380000	248530000	748980000	246830000	1	237.526	0	365.49	302.08	237.53	1	297.201	3.78095e-157	297.2	1	365.493	0	365.49	1	336.929	1.03882e-282	336.93	1	315.13	8.01478e-203	315.13	1	147.368	1.14979e-11	147.37	1	178.53	2.0512e-14	178.53					1
664	B4DGC3	cDNA FLJ57921, highly similar to Apolipoprotein D		0.0951522	0.0041623	Down	106130000	117190000			7135400	14114000	111660000	10624700	1	146.065	7.72514e-93	265.77	253.18	237.93	1	145.655	7.72514e-93	265.77	1	138.597	3.01231e-78	258.72					1	79.1345	4.38029e-23	153.12	0.999999	61.6254	0.0009537	116.23	1	82.104	9.08316e-09	156.48	1	146.065	1.07431e-51	237.93	1
685	G3XAP6	Cartilage oligomeric matrix protein (Cartilage oligomeric matrix protein, isoform CRA_b)	COMP hCG_37043	0.11994	0.00509077	Down	10311000000	17232000000	12061000000	1663300000	1231000000	1855800000	1.32013e+10	1.58337e+09	1	121.107	1.31291e-298	323.61	320.97	217.29	1	121.107	1.31291e-298	323.61	0.999991	50.3247	6.21269e-131	244.21	1	105.509	2.55524e-71	192.93	1	72.1883	4.37918e-94	221.26	1	74.6223	3.53047e-77	202.74	1	76.7246	2.06817e-71	193.81	1	118.689	1.43451e-84	210.31	1
851	F8WAZ6	Mitochondrial-processing peptidase subunit beta	PMPCB	0.369987	0.025483	Down	301320000	540130000	360620000	125860000	159730000	159160000	400690000	148250000	1	81.1906	0.00452968	114.78	69.065	81.191	1	113.696	0.00537993	113.7	1	98.9966	0.0161323	98.997	1	114.783	0.00452968	114.78	1	104.366	0.01252	104.37	1	93.5608	0.0192179	93.561	1	111.008	0.00748277	111.01	1	72.4847	0.0354045	72.485	1
853	G3V357	Ribonuclease pancreatic	RNASE1	0.318984	0.0204042	Down	509460000	519090000	841420000	245000000	216790000	134700000	6.23323e+08	198830000	1	126.658	4.71521e-80	241.4	195.72	126.66	1	68.5154	0.00524274	85.522	1	125.97	2.73249e-05	125.97	1	44.6158	0.00469161	110.86	1	141.084	2.65114e-46	241.4	1	158.08	1.98944e-05	158.08	1	99.5386	0.00226751	99.539	1	118.766	4.71521e-80	203.8	1
910	O75339	Cartilage intermediate layer protein 1 (CILP-1) (Cartilage intermediate-layer protein) [Cleaved into: Cartilage intermediate layer protein 1 C1; Cartilage intermediate layer protein 1 C2]	CILP UNQ602/PRO1188	0.175345	0.017852	Down	8004100000	9130000000	15290000000	2541100000	1197400000	1946900000	1.0808e+10	1.89513e+09	1	124.232	2.10481e-110	274.45	239.76	274.45	0.999992	50.7147	0.00164616	96.707	1	82.6719	3.52664e-12	188.25	1	75.8255	3.11277e-31	218.02	0.999942	42.3737	0.00248031	82.651	1	109.379	1.12397e-23	209.21	1	104.876	4.57769e-79	257.04	1	108.751	2.75257e-95	270.85	1
912	O75339	Cartilage intermediate layer protein 1 (CILP-1) (Cartilage intermediate-layer protein) [Cleaved into: Cartilage intermediate layer protein 1 C1; Cartilage intermediate layer protein 1 C2]	CILP UNQ602/PRO1188	0.0968693	0.0138094	Down	7474500000	15972000000	13975000000	2765400000	70583000	789010000	1.24738e+10	1208331000	1	88.0923	0	458.41	441.94	88.092	1	77.3901	4.98164e-70	207.5	1	80.9749	2.29177e-54	217.79	1	50.8827	7.51623e-280	332.36	1	58.0727	2.09979e-31	186.67	0.999994	52.5919	5.10808e-25	153.36	1	50.3582	1.10953e-31	187.47	1	88.0923	2.69303e-46	213.83	1
917	O75339	Cartilage intermediate layer protein 1 (CILP-1) (Cartilage intermediate-layer protein) [Cleaved into: Cartilage intermediate layer protein 1 C1; Cartilage intermediate layer protein 1 C2]	CILP UNQ602/PRO1188	0.107028	0.00608627	Down	3153200000	5514400000	4609800000	1041200000	104940000	274920000	4425800000	4.73687e+08	1	51.1468	1.04168e-202	308.74	261.18	51.147	1	58.6706	2.43673e-48	233.37	1	135.09	3.99266e-72	246.53	1	109.6	4.1171e-37	178	1	147.695	1.26643e-12	147.7	1	97.2911	0.0011134	97.291	1	51.2649	1.03238e-15	180.64	1	139.669	6.89238e-118	273.87	1
1029	P51888	Prolargin (Proline-arginine-rich end leucine-rich repeat protein)	PRELP SLRR2A	0.0229666	0.000563329	Down	119720000000	125870000000	90429000000	1545600000	2557800000	3613800000	1.12006e+11	2572400000	1	143.604	2.06325e-85	220.17	209.84	148.87	1	143.604	4.68674e-53	178.42	1	120.083	6.0586e-71	209.4	1	110.041	5.52288e-58	188.69	1	91.74	5.45316e-58	188.8	1	137.381	7.71254e-74	185.06	1	123.384	1.57059e-58	195.01	1	127.561	3.58033e-80	220.17	1
1171	Q7LGC8	Carbohydrate sulfotransferase 3 (EC 2.8.2.17) (Chondroitin 6-O-sulfotransferase 1) (C6ST-1) (Chondroitin 6-sulfotransferase) (Galactose/N-acetylglucosamine/N-acetylglucosamine 6-O-sulfotransferase 0) (GST-0)	CHST3	0.335907	0.0173987	Down	76379000	98846000	103330000	21654000		40725000	9.28517e+07	31189500	1	135.767	0.0033538	161.11	75.752	135.77	1	138.826	0.0033538	138.83	1	103.748	0.0171436	103.75	1	103.748	0.00336657	147.08	1	159.197	0.00576852	159.2					1	112.37	0.0106878	112.37	1	147.156	0.00336936	161.11	1
1	A0T4C3	Truncated MHC class II antigen (Fragment)	HLA-DRB1			KBD Unique				171210000		70327000		120768500	1	116.026	3.1252e-26	220.81	206.02	116.03													1	169.993	3.1252e-26	220.81					1	116.026	0.00045474	116.03
16	Q53FJ5	Prosaposin (Variant Gaucher disease and variant metachromatic leukodystrophy) variant (Fragment)				KBD Unique				24541000	32720000	19322000		2.55277e+07	1	138.726	4.12112e-34	210.34	196.25	138.73													1	143.929	1.19272e-09	143.93	1	88.5614	0.00165387	88.561	1	80.3867	0.00286898	80.387	1	168.495	4.12112e-34	168.5	1
33	S5MD53	Neurotrophic tyrosine receptor kinase type 2 (Fragment)				KBD Unique				7687200	7530600			7608900	1	64.7982	8.20531e-05	126.09	106.35	64.798													1	126.086	8.20531e-05	126.09	1	62.1618	0.0230957	62.162									1
67	A0A024R599	Solute carrier family 3 (Activators of dibasic and neutral amino acid transport), member 2, isoform CRA_e	SLC3A2 hCG_2016598			KBD Unique				38000000		18902000		28451000	1	62.9238	1.89529e-13	196.24	156.32	62.924													1	196.239	1.89529e-13	196.24					1	62.9238	0.0374851	62.924
68	A0A024R599	Solute carrier family 3 (Activators of dibasic and neutral amino acid transport), member 2, isoform CRA_e	SLC3A2 hCG_2016598			KBD Unique				28299000	12540000	24881000		2.19067e+07	0.996053	24.0197	2.11157e-40	229.53	176.95	155													0.993284	21.6995	2.11157e-40	229.53	0.98981	19.8739	9.30158e-09	147.91	0.996053	24.0197	8.34496e-09	155	0.983552	17.7668	0.00834857	84.687	0.993346
69	F5H5R4	Mas-related G-protein-coupled receptor member F	MRGPRF			KBD Unique				160470000	35141000	20772000		7.21277e+07	1	221.816	2.15441e-191	308	293.79	234.39													1	250.947	1.55255e-109	272.32	1	146.995	6.57921e-09	162.26	1	114.469	0.000120176	124.42	1	221.446	6.08686e-53	242.82	1
78	A0A024R5S2	Cancer susceptibility candidate 4, isoform CRA_a	CASC4 hCG_2003796			KBD Unique				20263000		10206000		15234500	0.995651	23.597	0.00667028	180.93	92.897	180.93													0.991691	20.7682	0.0214898	146.27					0.746322	4.68643	0.0419142	84.916	0.995651	23.597	0.0189149	180.93	0.993085
144	A0A3B3IRN5	Fibromodulin	FMOD			KBD Unique				27389000	181940000			104664500	0.974759	18.5423	3.85936e-40	148.22	137.94	43.903	0.974759	18.5423	1.0003e-11	93.295									0.545475	0.949481	3.85936e-40	148.22	0.566551	1.19018	8.59572e-09	71.299	0.439037	0	3.04009e-33	109.77					0.536897
149	A0A3B3IRN5	Fibromodulin	FMOD			KBD Unique					96735000	271590000		184162500	1	50.0335	0.00357195	110.76	80.947	50.034	0.5	0	0.00357195	110.76					0.5	0	0.0325389	51.445	0.5	0	0.035579	75.378	1	94.2966	0.010575	94.297	1	50.0335	0.0235288	60.434					0.657984
160	A0A024R972	Laminin, gamma 1 (Formerly LAMB2), isoform CRA_a	LAMC1 hCG_40729			KBD Unique				91334000	6617100			48975550	1	135.415	1.12718e-44	234.24	183.17	233.46													1	87.7285	1.53798e-09	176.78	0.999999	58.6261	0.00349863	99.215	1	76.8306	0.000511599	93.716	1	135.415	7.72782e-42	233.46	1
161	A0A024R972	Laminin, gamma 1 (Formerly LAMB2), isoform CRA_a	LAMC1 hCG_40729			KBD Unique				45024000	36145000			40584500	0.998988	29.942	0.00191118	150.4	63.533	150.4													0.984867	18.1345	0.00242985	145.16	0.816922	6.49543	0.0214642	88.948					0.970079	15.1083	0.00191118	128.61	0.998988
163	A0A024R972	Laminin, gamma 1 (Formerly LAMB2), isoform CRA_a	LAMC1 hCG_40729			KBD Unique				130250000		36944000		83597000	1	202.133	2.58056e-179	306.55	275.66	249.69													1	249.203	2.58056e-179	306.55	1	102.474	3.32901e-09	126.76	1	146.031	3.5522e-19	197.3	1	173.328	5.41149e-38	224.42	1
165	A0A024R972	Laminin, gamma 1 (Formerly LAMB2), isoform CRA_a	LAMC1 hCG_40729			KBD Unique				218650000	322920000	112880000		218150000	0.999999	62.6665	1.10221e-25	218.47	189.32	205.09													0.999999	60.8029	1.10221e-25	218.47	0.99996	43.9579	4.35105e-05	163.64	0.999995	52.7334	3.89666e-06	185.61	0.999999	62.6665	7.13348e-13	205.09	0.999999
185	B7Z1D1	Alkaline phosphatase (EC 3.1.3.1)				KBD Unique				238620000	118380000	113790000		156930000	1	222.39	3.51737e-269	340.93	320.79	293.94													1	216.397	1.30715e-147	290.18	1	177.695	7.03844e-41	227.2	1	254.237	3.24723e-216	322.77	1	258.755	3.51737e-269	340.93	1
186	B7Z1D1	Alkaline phosphatase (EC 3.1.3.1)				KBD Unique				115910000	85471000	70721000		9.07007e+07	1	189.758	3.0917e-242	275.5	252.05	275.5													1	164.563	2.73638e-66	221.25	1	112.544	1.73316e-31	155.16	1	187.719	2.12667e-117	261.17	1	177.851	3.0917e-242	258.87	1
203	B2R627	cDNA, FLJ92752, highly similar to Homo sapiens integrin, alpha 5 (fibronectin receptor, alphapolypeptide) (ITGA5), mRNA				KBD Unique				21063000		21044000		21053500	0.999902	40.1008	3.27099e-41	179.47	151.26	179.47													0.999902	40.1008	3.27099e-41	179.47					0.941312	12.1691	0.00565364	63.115
210	H0YFA9	N-acetylglucosamine-6-sulfatase (Fragment)	GNS			KBD Unique				5011800		7597100		6304450	1	44.2994	0.0206118	67.08	55.547	44.299													1	67.0795	0.0206118	67.08	1	55.4006	0.0305525	55.401	1	44.2994	0.0417989	44.299
213	B3KTQ2	cDNA FLJ38589 fis, clone HCHON2010074, highly similar to LACTADHERIN				KBD Unique					70665000	59348000		65006500	1	116.372	7.31349e-10	200.6	162.88	116.37					1	96.3311	0.00728814	96.331					1	102.062	0.00368744	102.06	1	165.975	0.00166773	165.98	1	52.4897	0.00108205	176.38	1	200.603	7.31349e-10	200.6	1
217	A0A024RC61	Aminopeptidase (EC 3.4.11.-)	ANPEP hCG_27217			KBD Unique				140710000	98302000	137300000		1.25437e+08	1	84.6583	2.12579e-13	175.49	175.49	84.658													1	88.1865	6.59405e-05	170.02	1	133.912	0.00812731	133.91	1	78.692	0.00631237	78.692	1	127.917	5.44413e-05	127.92	1
218	A0A024RC61	Aminopeptidase (EC 3.4.11.-)	ANPEP hCG_27217			KBD Unique				1104400000	47299000	180130000		443943000	0.999942	42.3678	1.47941e-76	226.71	208.42	226.71													0.999942	42.3678	1.47941e-76	226.71	0.823626	6.69296	0.0434306	47.472	0.999131	30.6081	5.89892e-39	168.64	0.993435	21.7991	8.49055e-45	191.65	0.999879
219	A0A024RC61	Aminopeptidase (EC 3.4.11.-)	ANPEP hCG_27217			KBD Unique				89474000	32852000	51219000		5.78483e+07	1	79.9855	5.11985e-31	230.24	177.08	79.986													1	132.01	5.11985e-31	230.24	1	111.607	0.00137527	111.61	1	86.8981	0.0066154	86.898					1
221	A0A024RC61	Aminopeptidase (EC 3.4.11.-)	ANPEP hCG_27217			KBD Unique				67408000	89195000	74216000		7.69397e+07	0.99989	39.5714	0	367.86	336.38	367.86													0.99989	39.5714	0	367.86	0.998993	29.9635	1.42333e-214	316.61	0.99816	27.3449	1.28073e-127	279.77
226	A0A1W2PQR6	Lysosome membrane protein 2	SCARB2			KBD Unique				69434000	66231000	84133000		73266000	1	118.239	7.10143e-08	130.27	108.26	118.24	1	97.2844	8.15221e-05	97.284					1	76.768	0.000790473	76.768	1	61.4775	0.00011549	106.16	1	101.743	0.000483924	101.74	1	63.4596	0.000483924	101.74	1	116.081	4.53561e-06	116.08	1
227	B4E3A7	cDNA FLJ52057, highly similar to Periostin				KBD Unique				908410000	9748300	83091000		3.3375e+08	1	169.795	1.0551e-58	244.06	195.27	244.06													1	169.795	1.0551e-58	244.06	0.999999	62.1073	0.00405679	107.24	1	148.566	9.76813e-19	211.64	1	149.107	2.86792e-19	214.64	1
234	Q29900	HLA-DR (Fragment)				KBD Unique				13596000		8613200		11104600	1	76.1697	0.00426541	105.36	101.47	76.17													1	105.358	0.00426541	105.36					1	76.1697	0.0209256	76.17
240	Q6QIN1	CD45 (Fragment)	PTPRC			KBD Unique				25497000		14514000		20005500	1	174.045	4.3793e-13	203.52	189.71	203.52													1	109.312	8.9693e-06	146.79					1	95.1428	0.000451584	122.26					1
248	A0A087WVS4	High affinity immunoglobulin gamma Fc receptor IB	FCGR1B			KBD Unique				29837000		6584600		18210800	1	101.954	4.37504e-23	213.34	182.27	101.95													1	213.344	4.37504e-23	213.34	1	73.7813	0.0299583	73.781	1	101.954	0.00445081	101.95
264	Q8IV28	NID2 protein	NID2			KBD Unique				53883000		25028000		39455500	1	55.7239	0.000288245	100.07	86.262	55.724													1	74.1501	0.00824776	74.15					1	65.4951	0.0233661	65.495					1
274	A0A087X0S5	Collagen alpha-1(VI) chain	COL6A1			KBD Unique				809200000	191550000	423380000		474710000	1	132.01	2.50355e-05	152.28	118.02	132.01													1	152.277	0.000719506	152.28	1	123.86	0.000311055	123.86	1	138.659	0.00107846	138.66	1	138.659	0.00107846	138.66	1
278	F5H125	Cell adhesion molecule 1 (Fragment)	CADM1			KBD Unique					141410000	112260000		126835000	1	169.655	1.12542e-21	195.27	158.89	169.65																	1	172.56	1.59771e-05	172.56	1	195.267	4.50611e-09	195.27	1	155.115	1.12542e-21	155.11	1
279	F5H125	Cell adhesion molecule 1 (Fragment)	CADM1			KBD Unique				80195000	8226700	49109000		4.58436e+07	1	105.032	3.07991e-40	227.37	189.07	105.03													1	227.373	3.07991e-40	227.37	1	71.0845	0.00798338	85.288	1	108.348	0.00323975	108.35	1	154.657	8.17264e-09	154.66	1
299	B7Z938	cDNA FLJ61727, highly similar to Laminin alpha-4 chain (Fragment)				KBD Unique				17807000	10740000	22485000		1.70107e+07	0.999993	51.2769	6.47608e-31	221.8	156.45	221.8													0.999993	51.2769	6.47608e-31	221.8	0.999957	43.7064	2.12712e-09	180.18	0.999917	40.8199	1.05674e-16	202.44	0.998593	28.5119	3.18353e-06	125.46
302	B7Z938	cDNA FLJ61727, highly similar to Laminin alpha-4 chain (Fragment)				KBD Unique					22749000	29139000		25944000	1	116.41	4.62502e-06	160.86	110.57	116.41													1	83.3966	0.0106391	83.397	1	70.0893	0.0161316	70.089	1	122.547	0.00223453	122.55	1	112.023	0.00103157	112.02	1
309	Q5JB40	Selectin-like protein				KBD Unique				22305000		18530000		20417500	0.862999	7.99285	6.89817e-05	130.98	91.834	91.855													0.5	0	6.89817e-05	130.98					0.862999	7.99285	0.00648387	91.855
314	B4DVS2	cDNA FLJ57617				KBD Unique				41496000		17601000		29548500	0.5	0	0.0195477	53.278	17.53	53.278													0.5	0	0.030729	45.608					0.5	0	0.0195477	53.278	0.5	0	0.0195477	53.278
315	B4DVS2	cDNA FLJ57617				KBD Unique				41496000		17601000		29548500	0.5	0	0.0195477	53.278	17.53	53.278													0.5	0	0.030729	45.608					0.5	0	0.0195477	53.278	0.5	0	0.0195477	53.278
321	Q6ZNN4	cDNA FLJ27428 fis, clone WMD05691, highly similar to Collagen alpha 2(XI) chain				KBD Unique					46983000	69731000		58357000	1	201.476	4.92442e-23	201.48	177.62	201.48																	1	105.17	0.00119632	105.17	1	102.621	0.00140282	102.62
327	A6NLC6	V-type proton ATPase subunit S1 (Fragment)	ATP6AP1			KBD Unique				10670000	13419000	10658000		1.15823e+07	1	69.7632	2.26376e-05	108.18	96.72	69.763													1	65.7837	0.00621873	65.784	1	44.7288	0.0251564	44.729	1	67.9947	0.00450586	67.995	1	108.18	2.26376e-05	108.18	1
330	A0A172Q3A0	Fibroblast activation protein (Fragment)				KBD Unique				58400000	18586000	19500000		32162000	1	103.546	0.00545319	107.15	74.313	103.55													1	103.7	0.0074109	103.7	1	82.7494	0.0178376	82.749	1	85.7306	0.0158311	85.731	1	107.154	0.00545319	107.15	1
332	A0A172Q3A0	Fibroblast activation protein (Fragment)				KBD Unique				111700000		22124000		66912000	1	240.845	3.21193e-109	271.65	209.87	240.85													1	271.651	3.21193e-109	271.65	1	78.6526	0.00253663	109.6	1	131.826	4.05236e-05	131.83					1
349	B5A959	Soluble FGFR1 variant 2	FGFR1			KBD Unique				19084000	16722000	12029000		15945000	1	92.8379	0.00325805	168.27	119.7	92.838													1	144.089	0.00325805	144.09	1	168.266	0.0047495	168.27	1	92.8379	0.0220467	92.838
351	B4DWE0	cDNA FLJ50260, highly similar to Cytochrome b-245 heavy chain				KBD Unique				33571000		8637900		21104450	1	170.566	3.99915e-07	196.95	147.53	196.95													1	170.566	3.99915e-07	196.95					1	141.749	0.00123663	161.02
353	B4DVE1	cDNA FLJ53478, highly similar to Galectin-3-binding protein				KBD Unique				81882000		32356000		57119000	1	70.9415	0.00559636	93.258	74.946	70.942													1	93.2576	0.00559636	93.258					1	82.1708	0.00987655	82.171					1
354	B4DVE1	cDNA FLJ53478, highly similar to Galectin-3-binding protein				KBD Unique				136290000	45501000	112430000		9.80737e+07	1	140.483	7.97112e-78	253.71	199.29	140.48													1	253.71	7.97112e-78	253.71	1	142.427	3.15848e-08	142.43	1	157.244	9.46462e-09	157.24	1	162.362	1.26256e-08	162.36	1
355	B4DVE1	cDNA FLJ53478, highly similar to Galectin-3-binding protein				KBD Unique				109320000	29238000	37941000		58833000	1	105.975	0.000104072	123.86	98.969	105.98													1	120.683	0.000481564	120.68	1	68.8931	0.0419721	68.893	1	94.6921	0.00549088	94.692					1
357	B4DVE1	cDNA FLJ53478, highly similar to Galectin-3-binding protein				KBD Unique				71608000		157060000		114334000	1	178.842	9.23727e-43	178.84	133.68	178.84													1	146.162	4.10775e-06	146.16	1	89.8046	0.00368986	89.805	1	170.995	4.73033e-06	170.99					1
365	A0A140T9H1	HLA class II histocompatibility antigen, DP alpha 1 chain (Fragment)	HLA-DPA1			KBD Unique				40126000		16854000		28490000	0.999999	60.1324	3.81003e-07	120.9	114.78	120.9													0.999999	60.1324	3.81003e-07	120.9					0.99962	34.1955	0.000979752	80.859
366	A0A2K9UYS7	MHC class II antigen	HLA-DPA1			KBD Unique				7573900		15138000		11355950	0.992593	21.2715	0.00575473	67.43	61.535	67.43													0.992593	21.2715	0.00575473	67.43					0.991335	20.5847	0.0275547	44.595
371	A0A140VJJ6	Testicular tissue protein Li 70				KBD Unique				100930000		28937000		64933500	0.996658	26.7653	1.04119e-12	199.11	184.48	147.75													0.987423	20.8908	1.04119e-12	199.11					0.996658	26.7653	8.39285e-06	147.75
374	A0A140VJW3	Sushi domain containing 2, isoform CRA_a (Testicular tissue protein Li 190)	SUSD2 hCG_2043017			KBD Unique				21644000	8508000	12484000		14212000	1	69.9792	0.00534631	94.616	67.501	69.979													1	94.6162	0.00534631	94.616	1	72.0057	0.0256186	72.006	1	69.9792	0.0299352	69.979
454	A0A384MDV6	Carboxypeptidase Z, isoform CRA_b (Epididymis secretory sperm binding protein)	CPZ hCG_16447			KBD Unique				5521900		19465000		12493450	0.999929	41.4603	1.03762e-07	88.551	66.33	88.551													0.998663	28.732	0.00369096	69.081					0.999929	41.4603	1.03762e-07	88.551
507	M0QYW8	L-amino-acid oxidase (Fragment)	IL4I1			KBD Unique				56405000		37836000		47120500	1	101.381	0.00443955	104.22	57.796	101.38													1	104.221	0.00443955	104.22	1	76.2819	0.0302323	76.282	1	101.381	0.00487473	101.38
508	B3KQB2	cDNA FLJ90112 fis, clone HEMBA1006707, highly similar to Matrilin-4				KBD Unique				97334000	69755000	88192000		8.50937e+07	1	128.976	1.27605e-41	179.36	174.47	128.98													1	115.536	9.83848e-09	115.54	1	98.1213	0.000362337	98.121	1	123.142	1.46349e-39	168.14	1	144.505	1.80522e-25	144.5	1
517	Q53GD2	Fibrinogen-like 2 variant (Fragment)				KBD Unique					23641000	10136000		16888500	1	138.396	0.00194293	138.4	93.949	138.4													1	109.714	0.0116651	109.71	1	87.3076	0.0222524	87.308	1	112.842	0.00604798	112.84	1	98.0331	0.0167805	98.033	1
518	Q53GD2	Fibrinogen-like 2 variant (Fragment)				KBD Unique				43174000	36620000	30939000		36911000	0.999614	34.1325	0.000588293	106.55	97.013	106.55					0.999442	32.5287	0.000588293	97.203					0.998788	29.1589	0.00132221	97.203	0.999614	34.1325	0.000716647	106.55	0.99948	32.8351	0.000756162	105.99
523	A5D8U1	Matrilin 4	MATN4			KBD Unique					30802000	60324000		45563000	1	227.305	5.30716e-90	227.3	223.96	227.3																	1	115.555	6.6574e-10	115.55	1	172.907	3.51494e-51	172.91	1	82.8495	0.000225196	82.849	1
[truncated: 113 more rows]
[truncated: 35 more columns]

## Sheet: OA-CK
ID	Protein	Protein names	Gene names	Ratio OA/CK	P Value OA/CK	Significant OA/CK	CK1	CK2	CK3	OA1	OA2	OA3	Average CK	Average OA	Localization prob	Score diff	PEP	Score	Delta score	Score for localization	Localization prob CK1	Score diff CK1	PEP CK1	Score CK1	Localization prob CK2	Score diff CK2	PEP CK2	Score CK2	Localization prob CK3	Score diff CK3	PEP CK3	Score CK3	Localization prob KBD1	Score diff KBD1	PEP KBD1	Score KBD1	Localization prob KBD2	Score diff KBD2	PEP KBD2	Score KBD2	Localization prob KBD3	Score diff KBD3	PEP KBD3	Score KBD3	Localization prob OA1	Score diff OA1	PEP OA1	Score OA1	Localization prob OA2
[truncated: 382 more rows]
[truncated: 35 more columns]

[truncated: 1 more sheets: KBD-OA]
